# Supplementary material
Source: ML conference proceedings conference paper supplement (https://openreview.net/forum?id=awtd0XhzKQ)

Hypothesis

[Path 1]:

0: Start of execution: Beginning Search

1: Searching: query(Candidate Variable\_0)

2: Searching: query\_cakes\_from\_eggs(Candidate Variable\_0)

3: Searching: cakes\_from\_eggs(37, Candidate Variable\_0)

4: Searching: \_5830 is 37//3

5: Found: 12 is 37//3

6: Found: cakes\_from\_eggs(37, 12)

7: Found: query\_cakes\_from\_eggs(12)

8: Found: query(12) | {'Result': 'Answer = 12'}

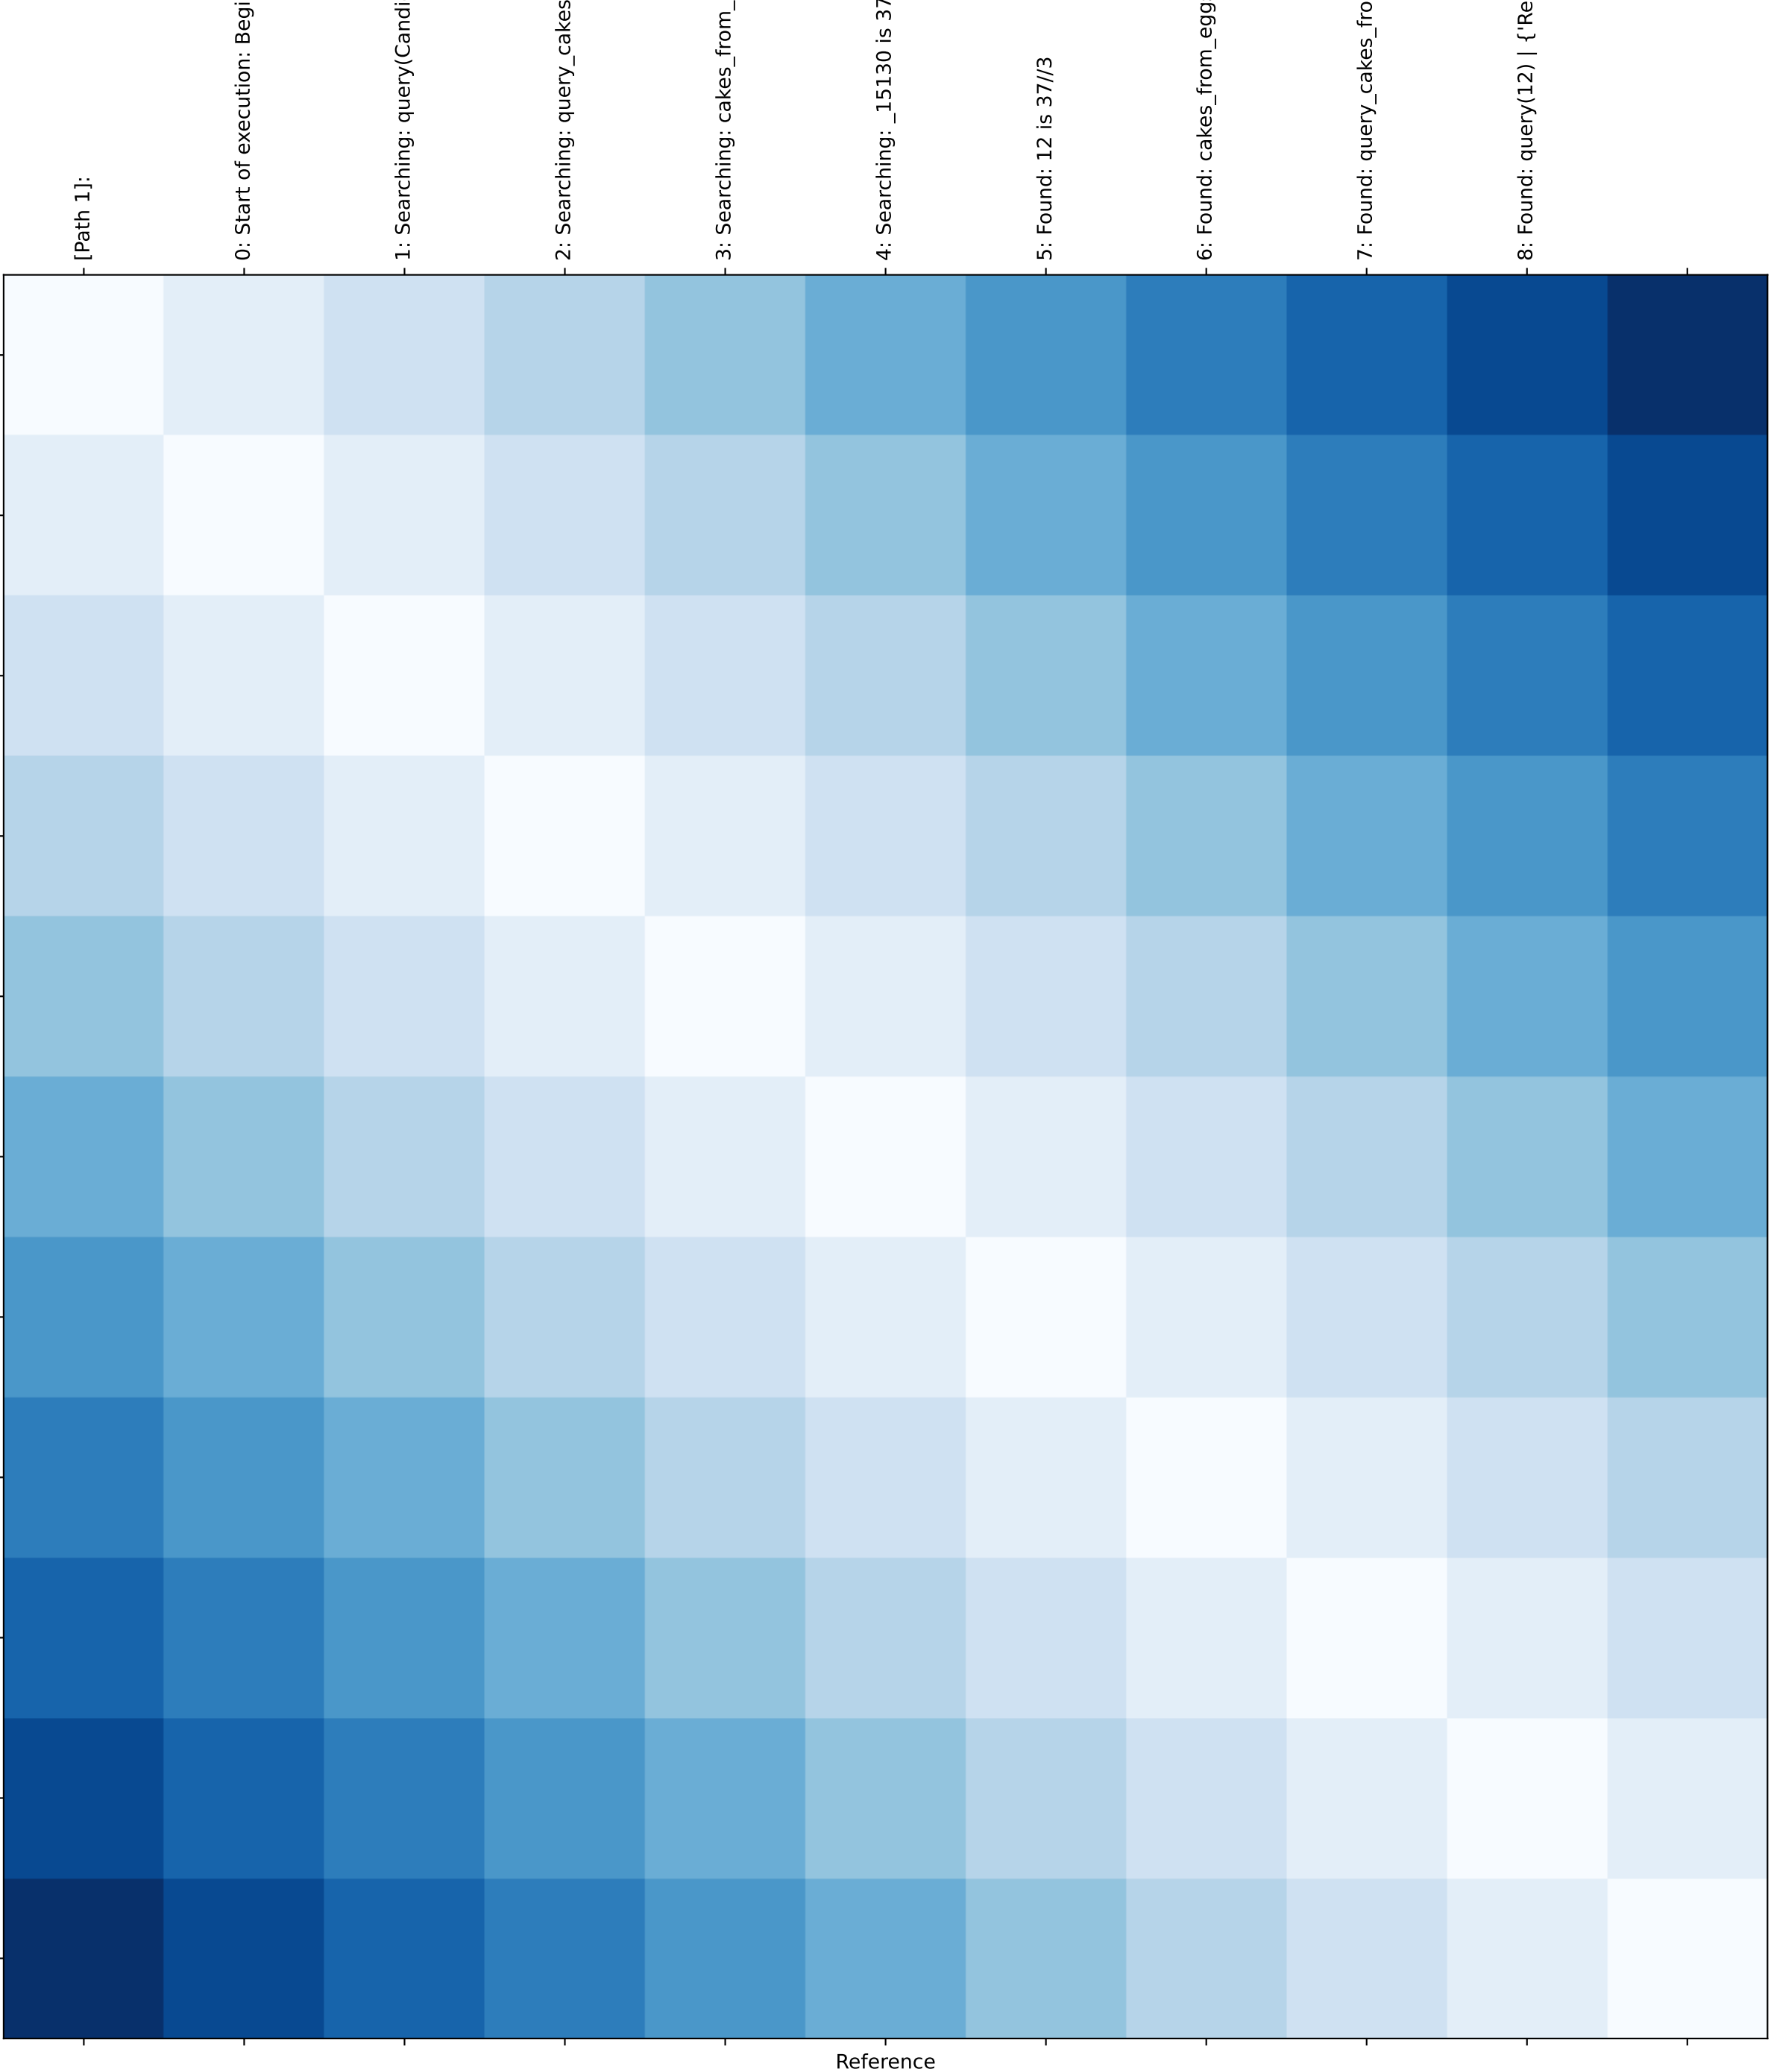

Supplement: supplementary_material [file attachment]
