# Supplementary material
Source: ML conference proceedings conference paper supplement (https://openreview.net/forum?id=awtd0XhzKQ)
Supplement: supplementary_material [file attachment]

Hypothesis

[Path 1]:

0: Start of execution: Beginning Search

1: Searching: query(Candidate Variable\_0)

2: Searching: calculate\_total\_bill(Candidate Variable\_0)

3: Searching: amount\_paid\_per\_person(Candidate Variable\_1)

4: Found: amount\_paid\_per\_person(33)

5: Searching: \_5830 is 33\*2

6: Found: 66 is 33\*2

7: Found: calculate\_total\_bill(66)

8: Found: query(66) | {'Result': 'TotalBill = 66'}

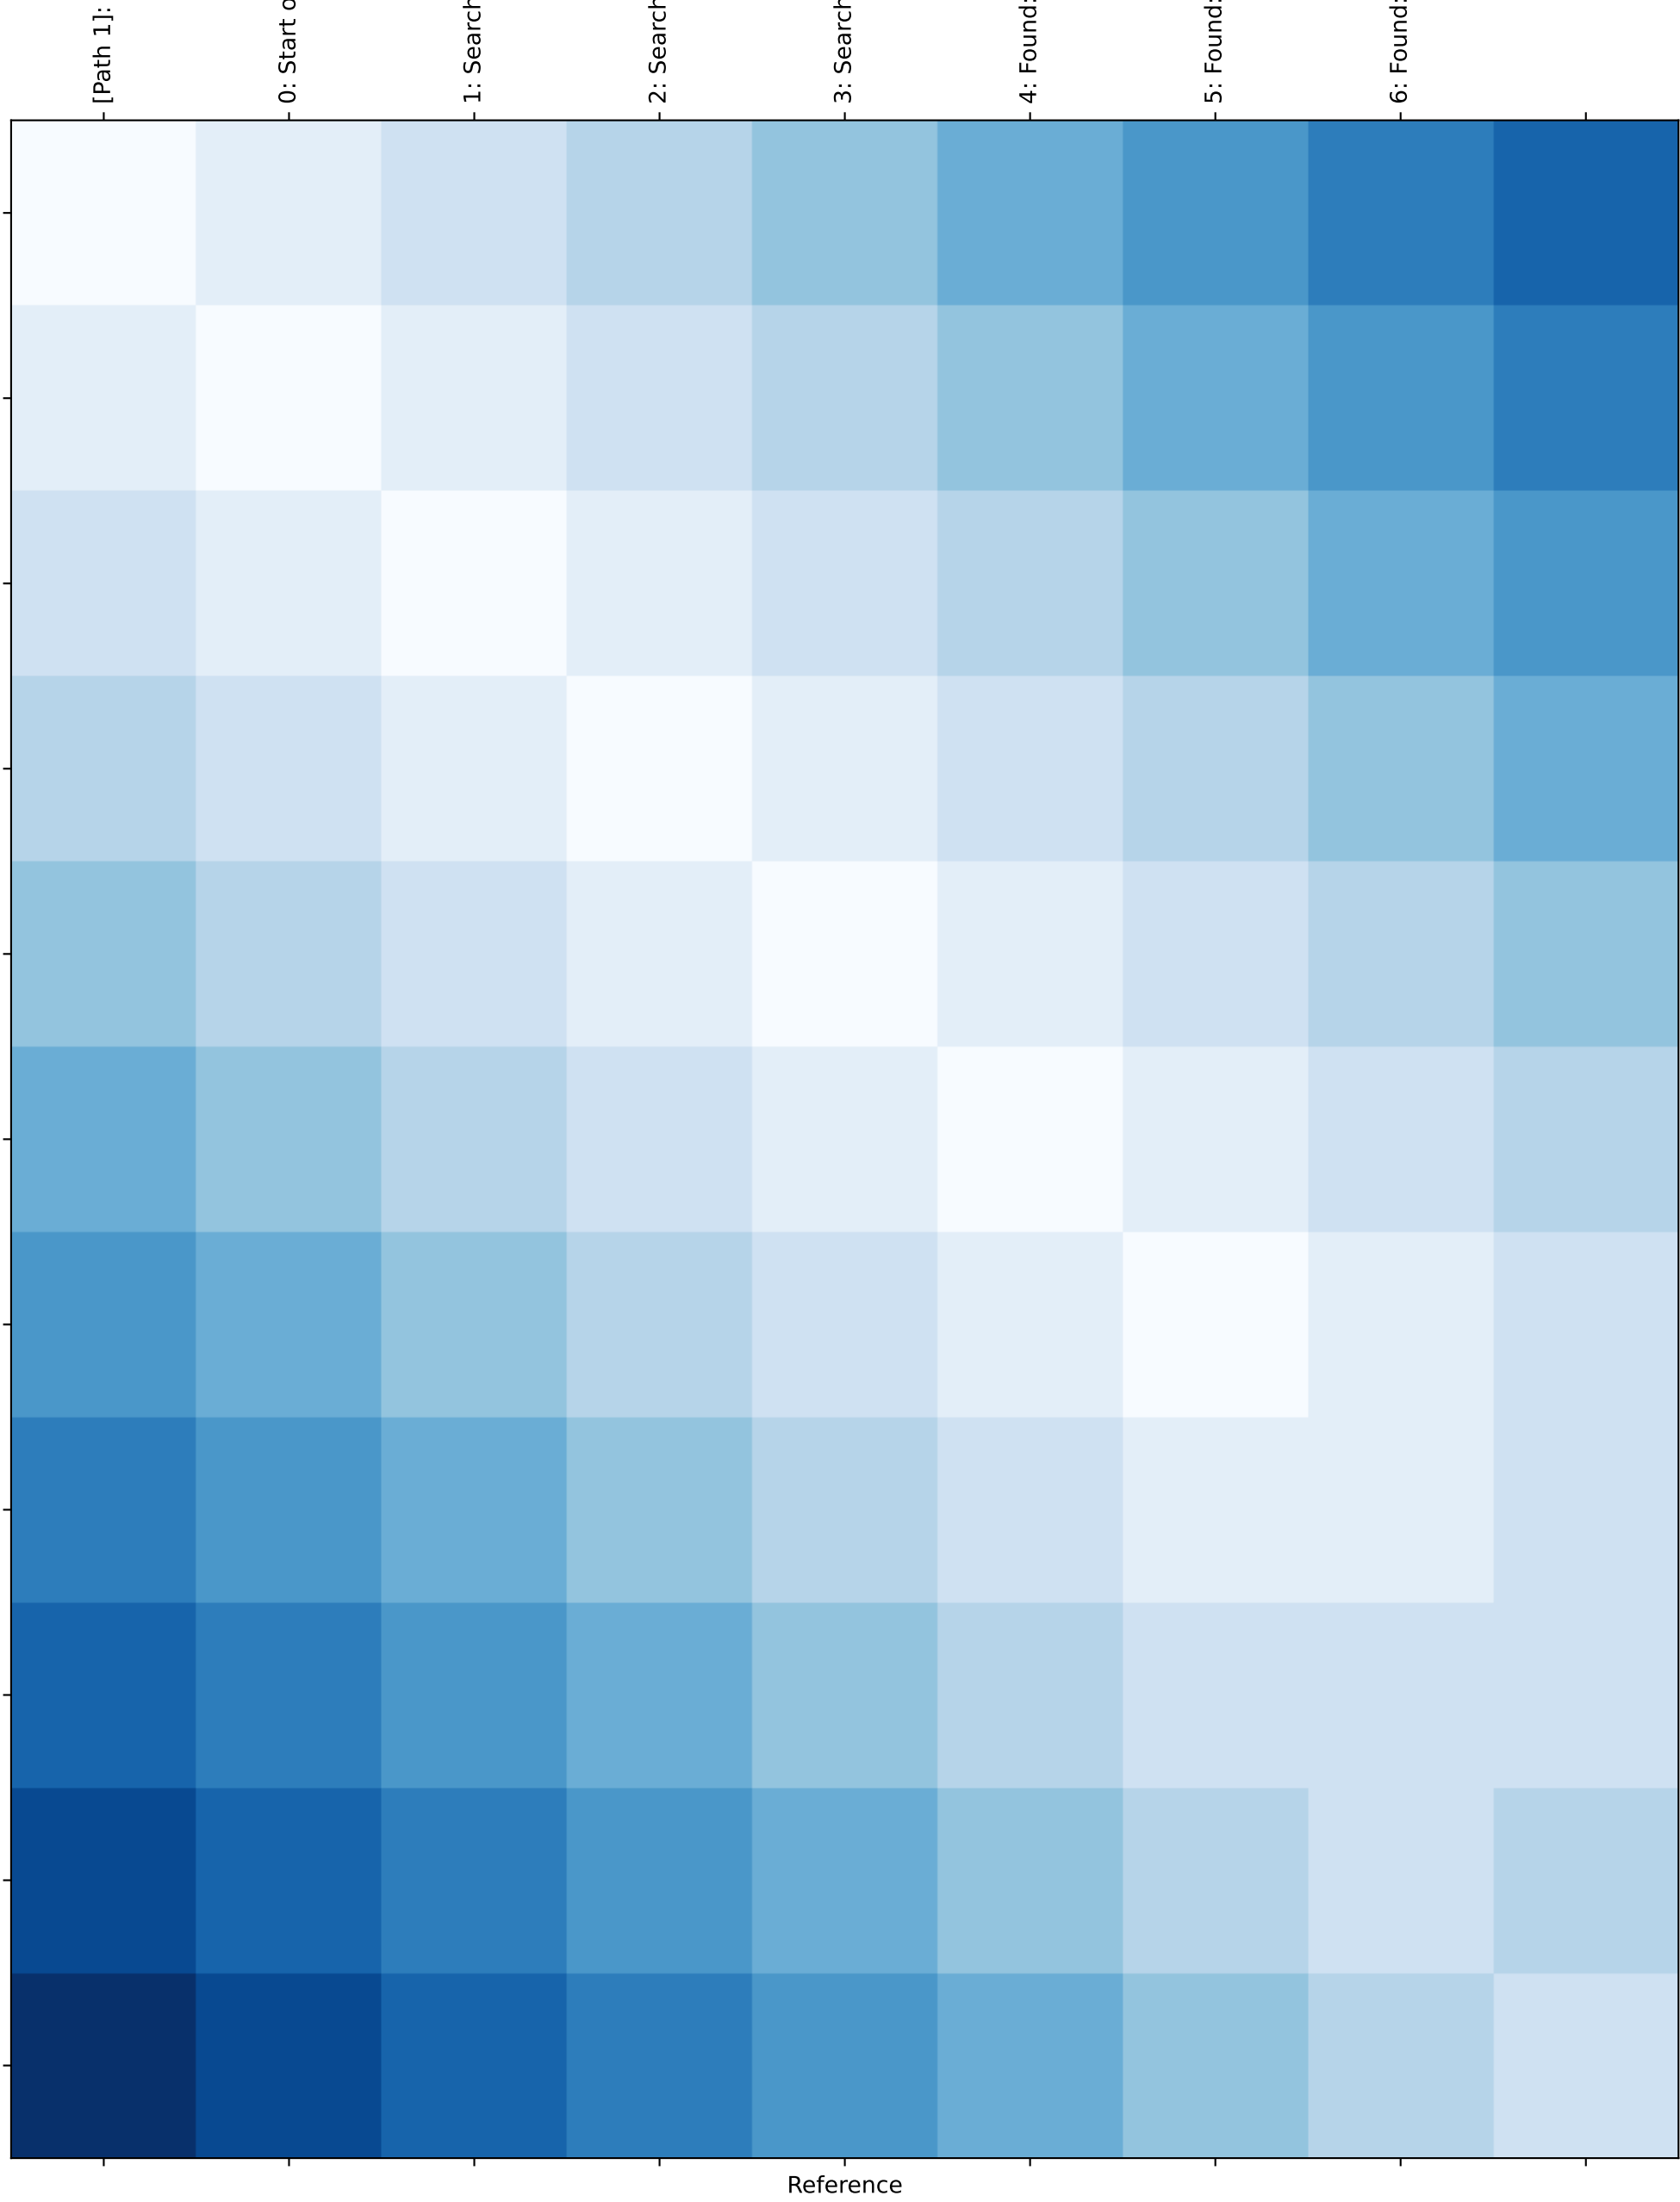

Reference
