# Supplementary material
Source: ML conference proceedings conference paper supplement (https://openreview.net/forum?id=awtd0XhzKQ)
Supplement: supplementary_material [file attachment]

Hypothesis

8: Found: query(190) | {'Result': 'FinalCakes = 190'}

7: Found: final\_cakes(173, 103, 86, 190)

6: Found: 190 is 276-86

5: Searching: \_5830 is 276-86

4: Found: 276 is 173+103

3: Searching: \_14520 is 173+103

2: Searching: final\_cakes(173, 103, 86, Candidate Variable\_0)

1: Searching: query(Candidate Variable\_0)

0: Start of execution: Beginning Search

[Path 1]:

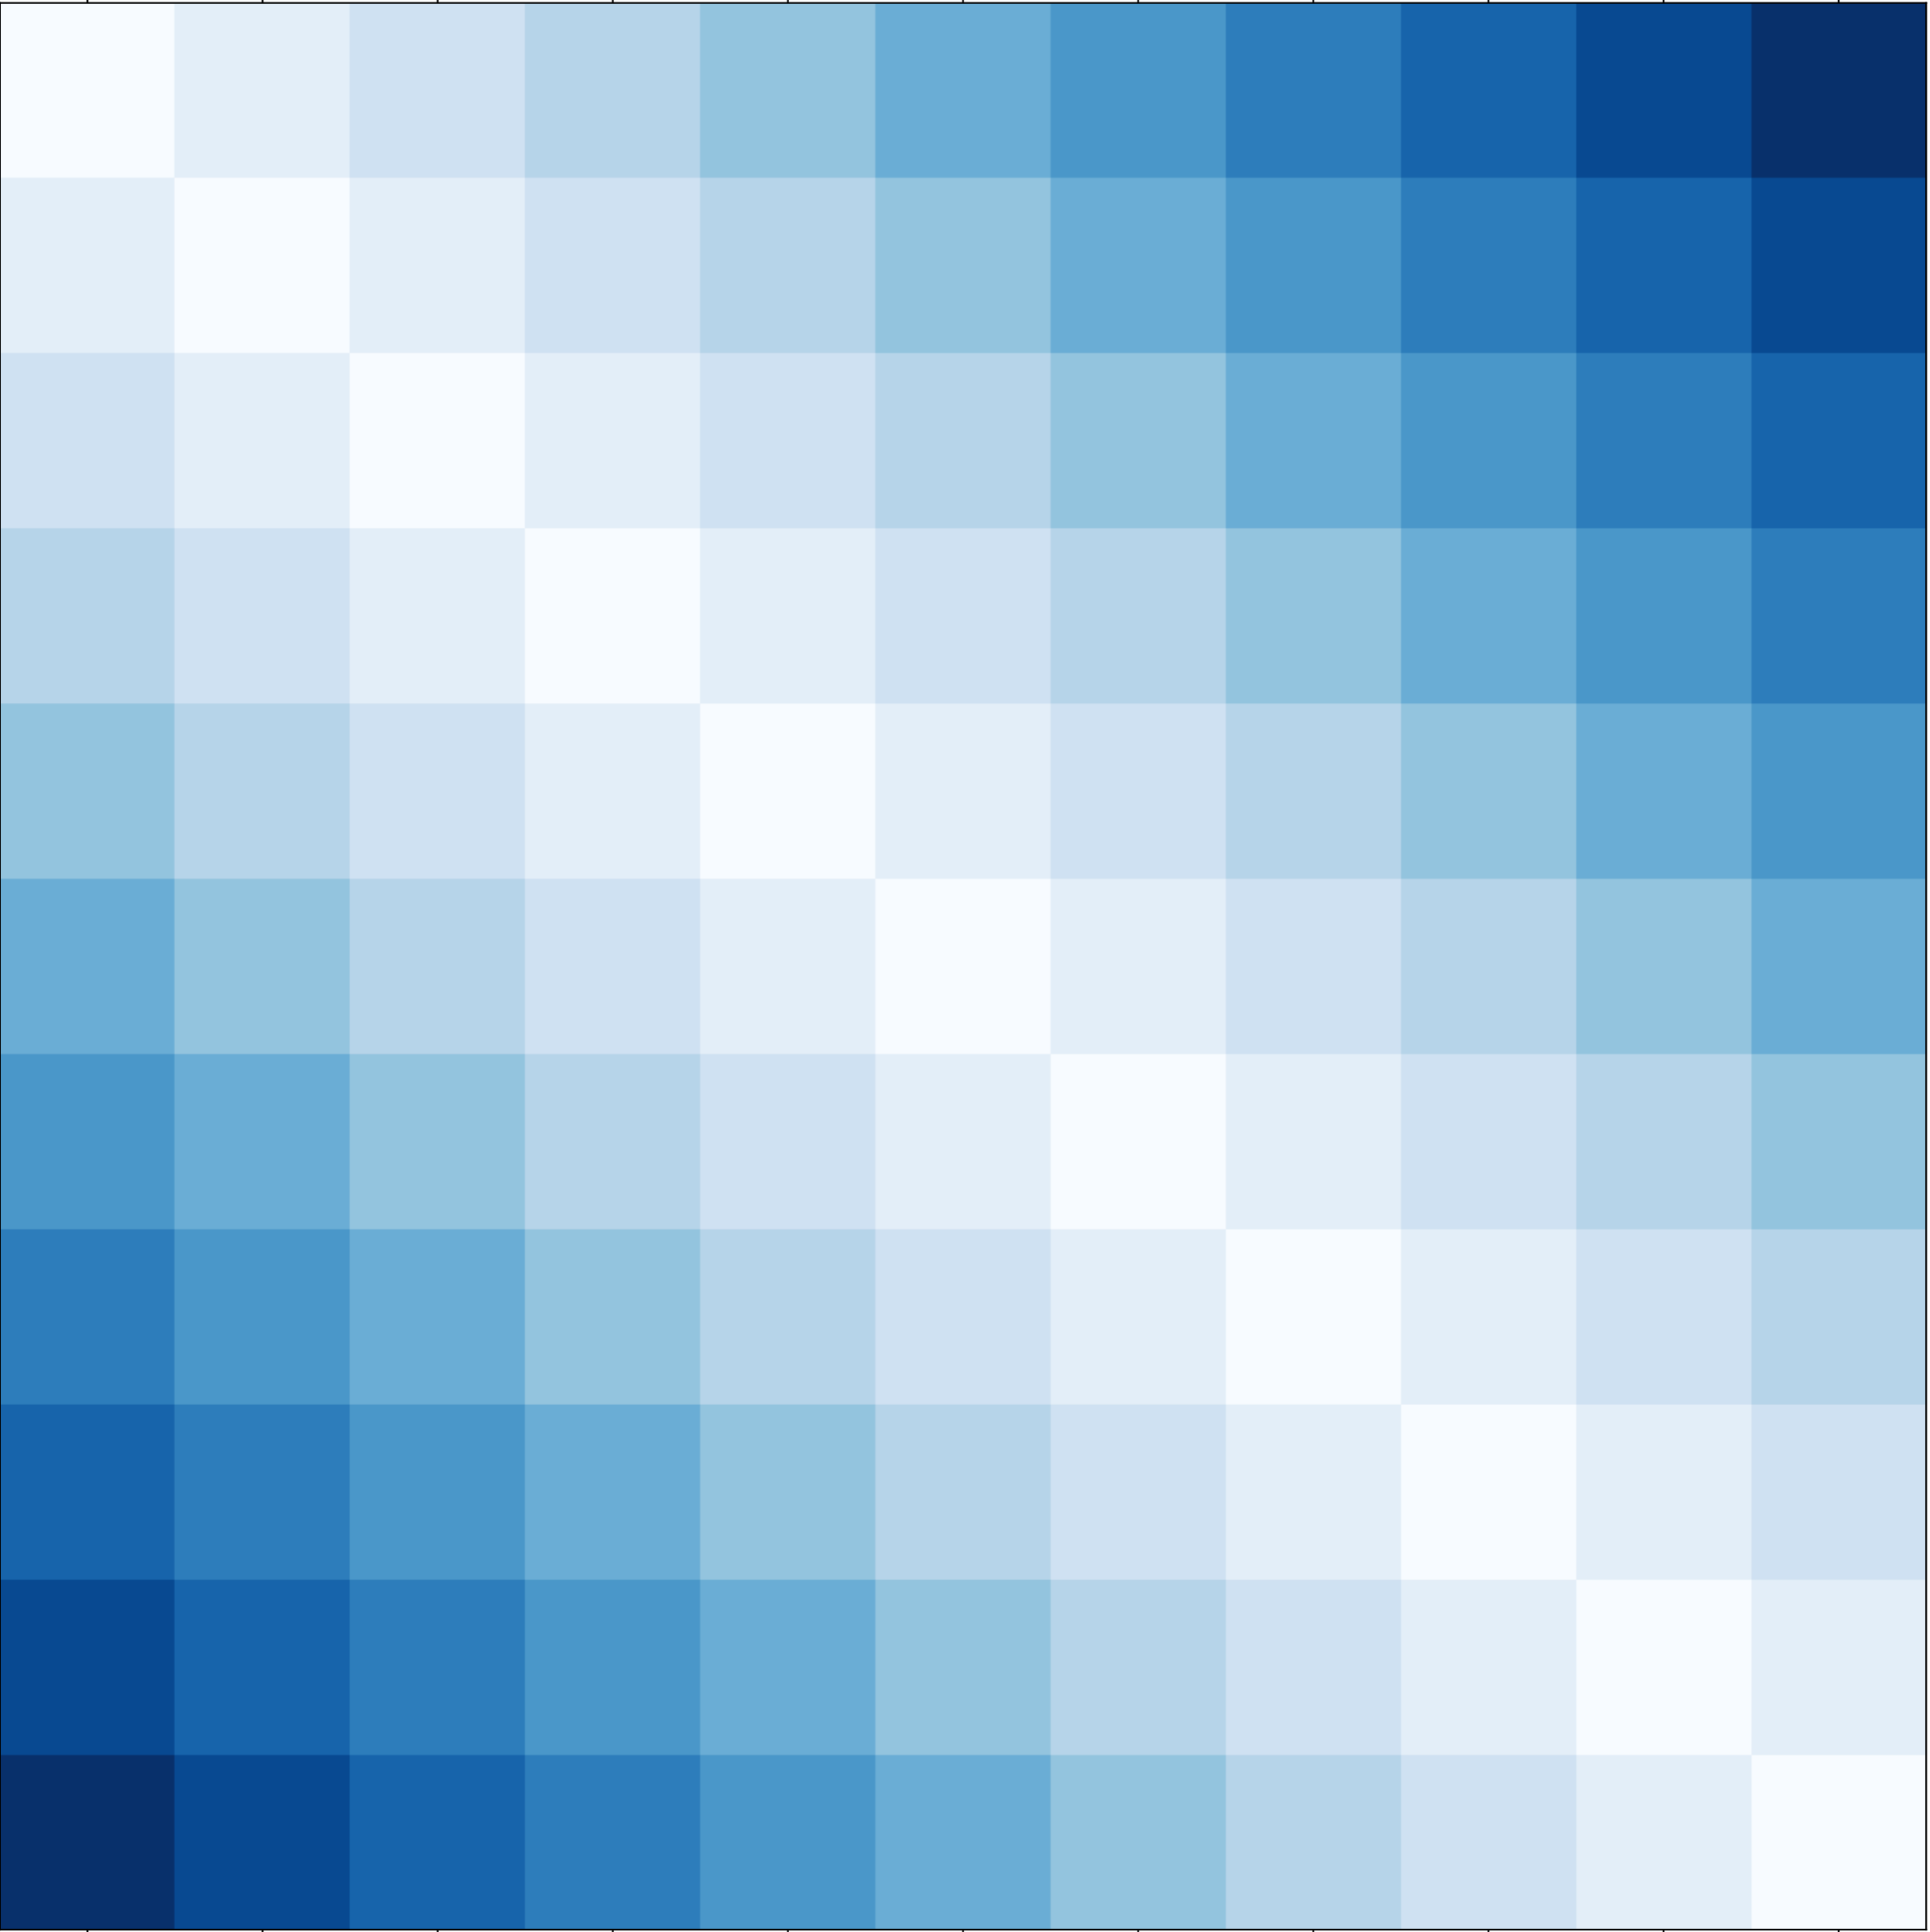

Reference
