# Supplementary material
Source: ML conference proceedings conference paper supplement (https://openreview.net/forum?id=awtd0XhzKQ)
Supplement: supplementary_material [file attachment]

Hypothesis

[Path 1]:

0: Start of execution: Beginning Search

1: Searching: query(Candidate Variable\_0)

2: Searching: smallest\_cats(18, Candidate Variable\_0)

3: Searching: find\_smallest\_cats(18, 1, Candidate Variable\_0)

4: Searching: 0 is 18 mod 1

5: Found: 0 is 18 mod 1

6: Found: find\_smallest\_cats(18, 1, 1)

7: Found: smallest\_cats(18, 1)

8: Found: query(1) | {'Result': 'SmallestCats = 1'}

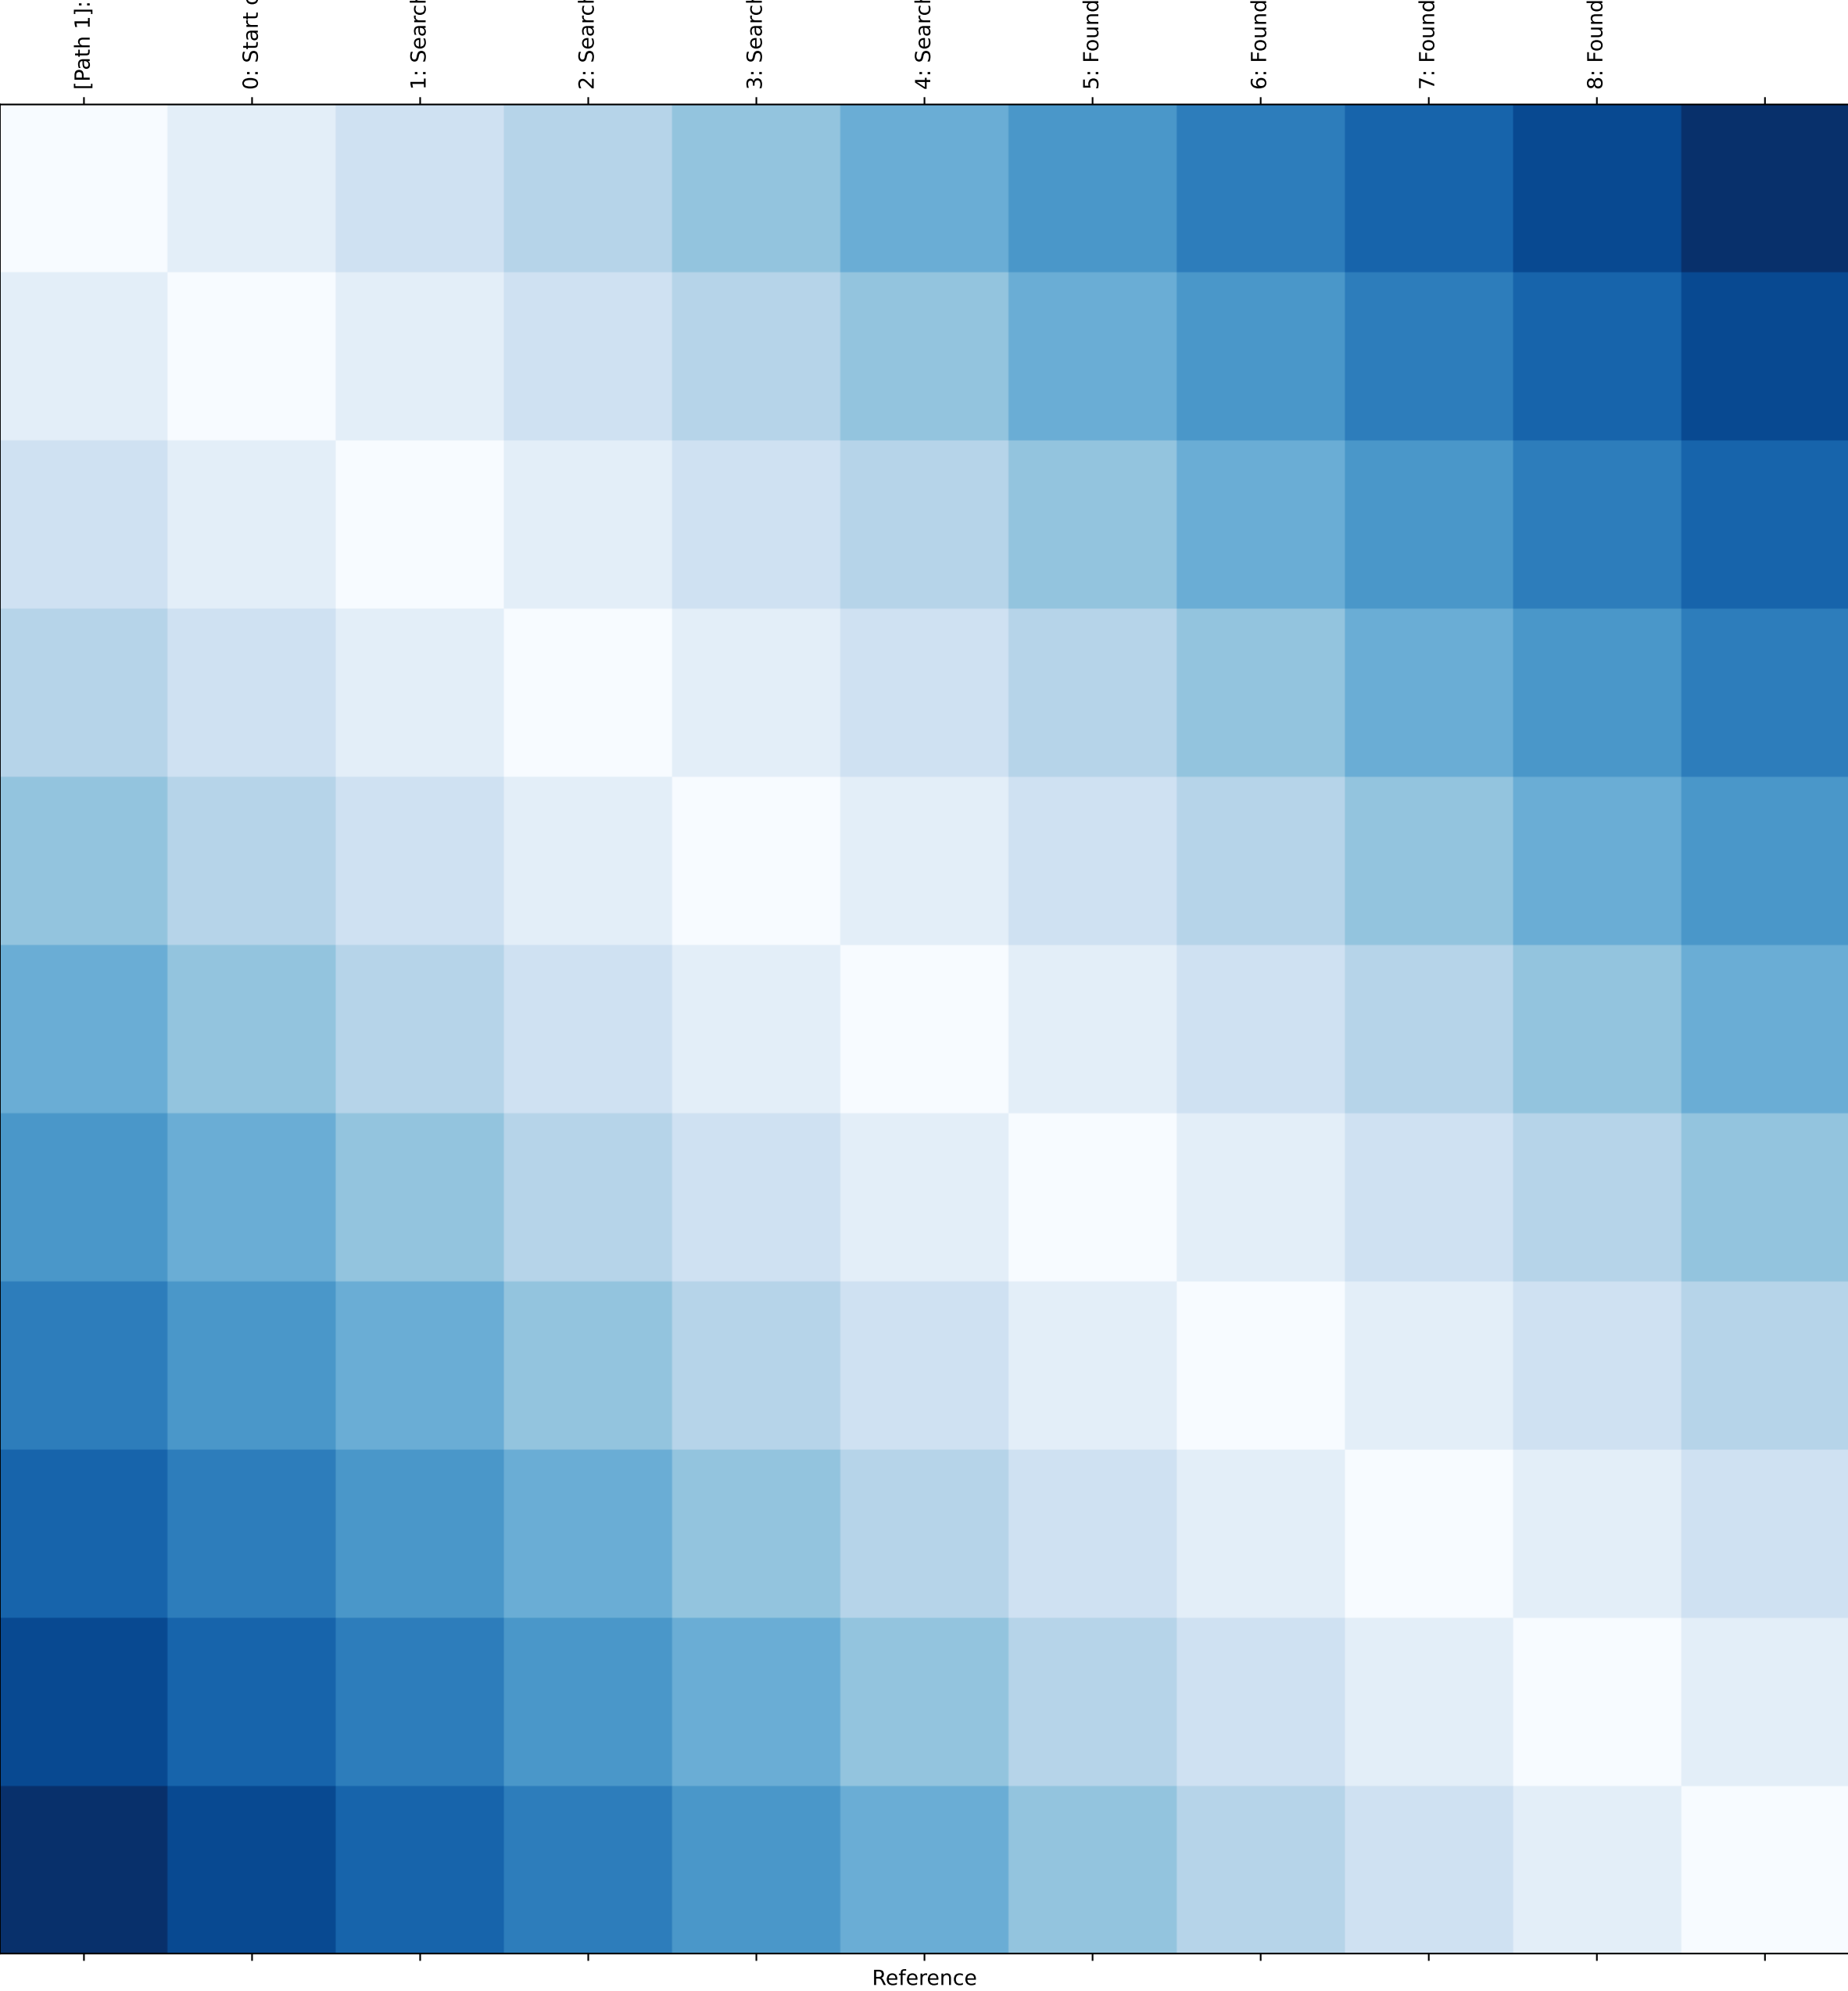

Reference
