# Supplementary material
Source: ML conference proceedings conference paper supplement (https://openreview.net/forum?id=awtd0XhzKQ)
Supplement: supplementary_material [file attachment]

Hypothesis

10: Found: query(19) | {'Result': 'Bookshelves = 19'}

9: Found: calculate\_bookshelves(38, 2, 19)

8: Found: 19 is 38//2

7: Searching: \_5830 is 38//2

6: Searching: calculate\_bookshelves(38, 2, Candidate Variable\_0)

5: Found: 2=2

4: Searching: \_15126=2

3: Found: 38=38

2: Searching: \_13900=38

1: Searching: query(Candidate Variable\_0)

0: Start of execution: Beginning Search

[Path 1]:

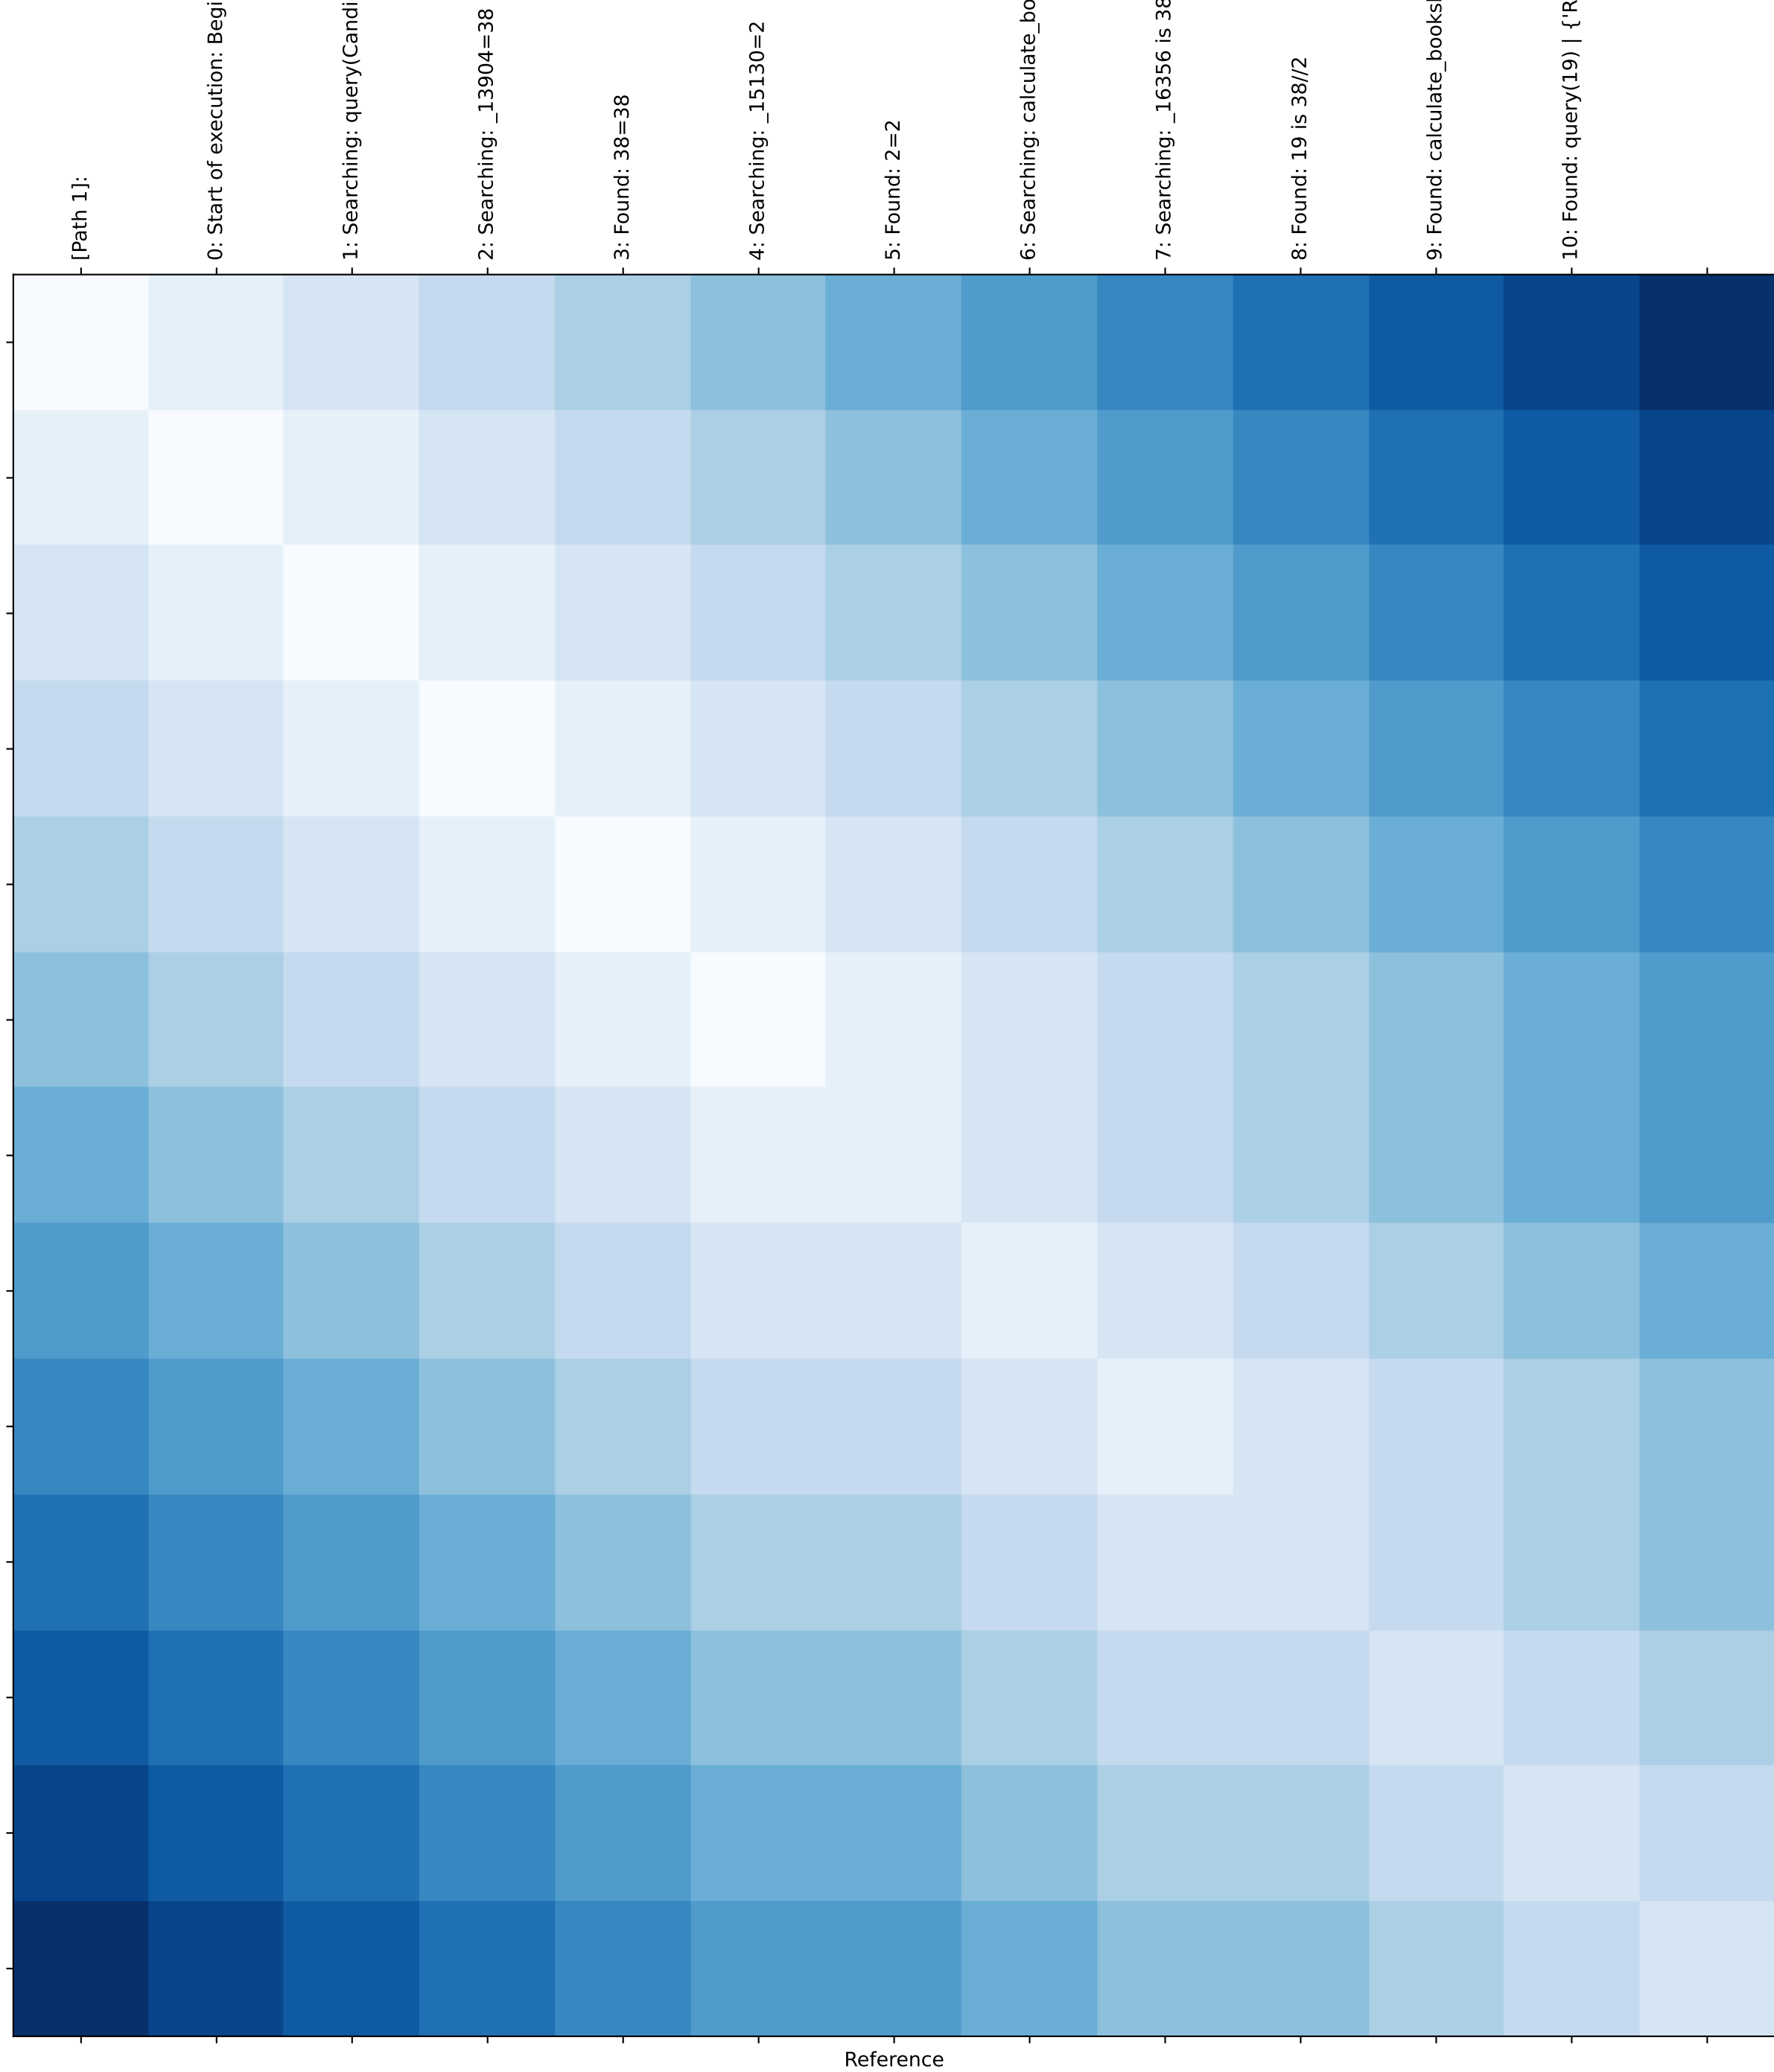

Reference
