# Supplementary material
Source: ML conference proceedings conference paper supplement (https://openreview.net/forum?id=awtd0XhzKQ)
Supplement: supplementary_material [file attachment]

Hypothesis

12: Found: query(11676) | {'Result': 'TotalLadybugs = 11676'}

11: Found: total\_ladybugs(11676)

10: Found: 11676 is 11676

9: Searching: \_5830 is 11676

8: Found: 11676 is 139\*84

7: Searching: \_16960 is 139\*84

6: Found: 84=84

5: Searching: \_15734=84

4: Found: 139=139

3: Searching: \_14508=139

2: Searching: total\_ladybugs(Candidate Variable\_0)

1: Searching: query(Candidate Variable\_0)

0: Start of execution: Beginning Search

[Path 1]:

[Path 1]:

0: Start of execution: Beginning Search

1: Searching: query(Candidate Variable\_0)

2: Searching: total\_ladybugs(Candidate Variable\_0)

3: Searching: \_14508=139

4: Found: 139=139

5: Searching: \_15734=84

6: Found: 84=84

7: Searching: \_16960 is 139\*84

8: Found: 11676 is 139\*84

9: Found: total\_ladybugs(11676)

10: Found: query(11676) | {'Result': 'TotalLadybugs = 11676'}

Reference
