# Supplementary material
Source: ML conference proceedings conference paper supplement (https://openreview.net/forum?id=awtd0XhzKQ)
Supplement: supplementary_material [file attachment]

Hypothesis

[Path 1]:

0: Start of execution: Beginning Search

1: Searching: query

2: Searching: fan\_knowledge\_of\_rickman

3: Searching: harry\_potter\_popularity(Candidate Variable\_0)

4: Found: harry\_potter\_popularity(global)

5: Searching: severus\_snape\_significance(Candidate Variable\_1)

6: Found: severus\_snape\_significance(high)

7: Searching: alan\_rickman\_in\_harry\_potter(Candidate Variable\_2)

8: Found: alan\_rickman\_in\_harry\_potter(professor\_snape)

9: Searching: global=global

10: Found: global=global

11: Searching: high=high

12: Found: high=high

13: Searching: true

14: Found: true

15: Found: fan\_knowledge\_of\_rickman

16: Found: query | {'Result': 'Yes'}

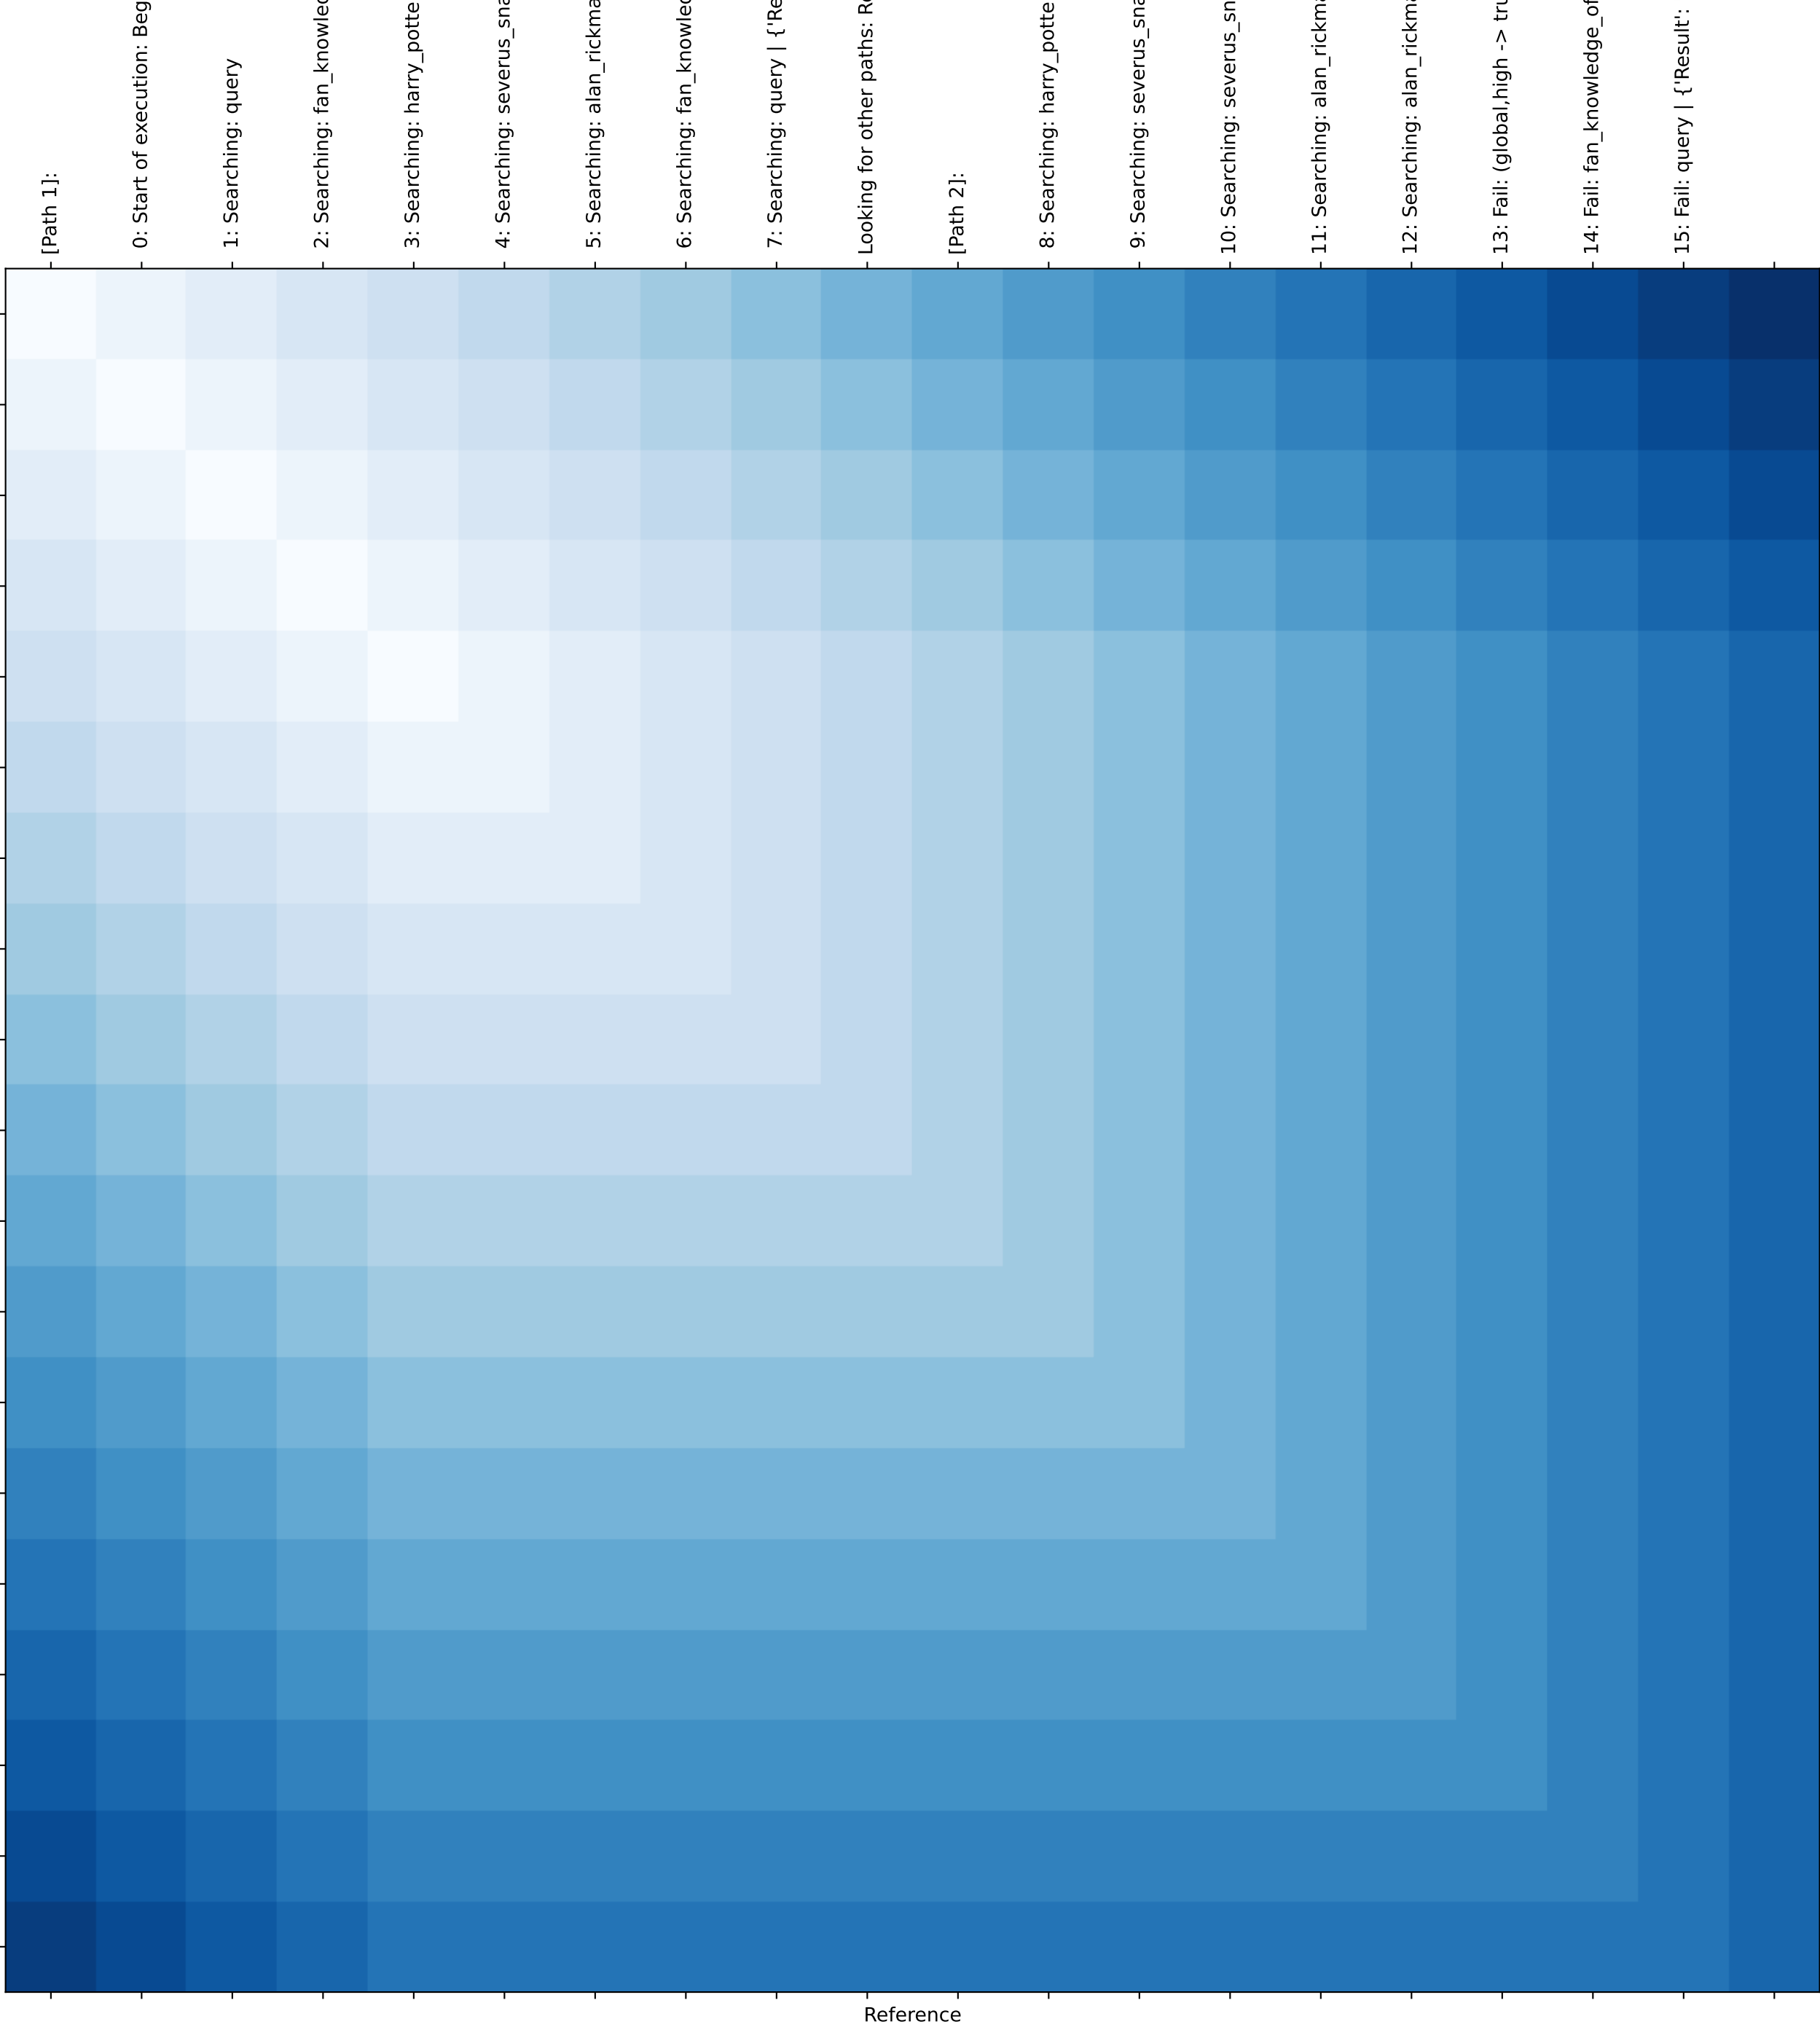

Reference
