# Supplementary material
Source: ML conference proceedings conference paper supplement (https://openreview.net/forum?id=awtd0XhzKQ)
Supplement: supplementary_material [file attachment]

Hypothesis

0: Start of execution: Beginning Search

1: Searching: query

2: Searching: uncle(joseph, danielle)

3: Searching: sibling(joseph, Candidate Variable\_0)

4: Found: sibling(joseph, jami)

5: Searching: parent(jami, danielle)

6: Fail: parent(jami, danielle) | {'Result': 'Search Failed'}

7: Fail: uncle(joseph, danielle) | {'Result': 'Search Failed'}

8: Fail: query | {'Result': 'Search Failed'}

[Path 1]:

Reference
