# Supplementary material
Source: ML conference proceedings conference paper supplement (https://openreview.net/forum?id=awtd0XhzKQ)
Supplement: supplementary_material [file attachment]

Hypothesis

[Path 1]:  
0: Start of execution: Beginning Search  
1: Searching: query  
2: Searching: apply\_criteria(Candidate Variable\_0)  
3: Searching: voldemort\_backstory(Candidate Variable\_1)  
4: Found: voldemort\_backstory(muggle\_parentage)  
5: Searching: voldemort\_admission\_criteria(Candidate Variable\_2)  
6: Found: voldemort\_admission\_criteria(pure\_bloodline)  
7: Searching: pure\_bloodline=pure\_bloodline  
8: Found: pure\_bloodline=pure\_bloodline  
9: Searching: parentage\_check(muggle\_parentage, Candidate Variable\_0)  
10: Found: parentage\_check(muggle\_parentage, true)  
11: Found: apply\_criteria(true)  
12: Searching: true  
13: Found: true  
14: Searching: true  
15: Found: true  
16: Found: query | {'Result': 'Yes'}  
Looking for other paths: Redo: apply\_criteria(Candidate Variable\_0)  
[Path 2]:  
17: Searching: \_13878=true  
18: Found: true=true  
19: Found: apply\_criteria(true)  
20: Searching: true  
21: Found: true  
22: Searching: true  
23: Found: true  
24: Found: query | {'Result': 'Yes'}  
Looking for other paths: Redo: voldemort\_backstory(Candidate Variable\_1)  
[Path 3]:  
25: Found: voldemort\_backstory(abandoned\_child)  
26: Searching: voldemort\_admission\_criteria(Candidate Variable\_3)  
27: Found: voldemort\_admission\_criteria(pure\_bloodline)  
28: Searching: pure\_bloodline=pure\_bloodline  
29: Found: pure\_bloodline=pure\_bloodline  
30: Searching: parentage\_check(abandoned\_child, Candidate Variable\_0)  
31: Found: parentage\_check(abandoned\_child, true)  
32: Found: apply\_criteria(true)  
33: Searching: true  
34: Found: true  
35: Searching: true  
36: Found: true  
37: Found: query | {'Result': 'Yes'}  
Looking for other paths: Redo: apply\_criteria(Candidate Variable\_0)  
[Path 4]:  
38: Searching: \_13878=true  
39: Found: true=true  
40: Found: apply\_criteria(true)  
41: Searching: true  
42: Found: true  
43: Searching: true  
44: Found: true  
45: Found: query | {'Result': 'Yes'}

[Path 1]:

0: Start of execution: Beginning Search  
1: Searching: query  
2: Searching: apply\_criteria(Candidate Variable\_0)  
3: Searching: voldemort\_backstory(Candidate Variable\_1)  
4: Searching: voldemort\_admission\_criteria(Candidate Variable\_2)  
5: Searching: voldemort\_admission\_criteria(pure\_bloodline)  
6: Searching: pure\_bloodline=pure\_bloodline  
7: Searching: pure\_bloodline=pure\_bloodline  
8: Searching: parentage\_check(muggle\_parentage, Candidate Variable\_0)  
9: Searching: parentage\_check(muggle\_parentage, true)  
10: Searching: apply\_criteria(true)  
11: Searching: true  
12: Searching: true  
13: Searching: query | {'Result': 'Yes'}  
Looking for other paths: Redo: apply\_criteria(Candidate Variable\_0)  
[Path 2]:  
14: Searching: voldemort\_backstory(Candidate Variable\_1)  
15: Searching: voldemort\_admission\_criteria(Candidate Variable\_2)  
16: Searching: voldemort\_admission\_criteria(pure\_bloodline)  
17: Searching: pure\_bloodline=pure\_bloodline  
18: Searching: pure\_bloodline=pure\_bloodline  
19: Searching: parentage\_check(muggle\_parentage, Candidate Variable\_0)  
20: Searching: parentage\_check(muggle\_parentage, true)  
21: Searching: true  
22: Searching: true  
23: Searching: make\_excuse(Candidate Variable\_3)  
24: Searching: query | {'Result': 'Yes'}

Reference
