# Supplementary material
Source: ML conference proceedings conference paper supplement (https://openreview.net/forum?id=awtd0XhzKQ)
Supplement: supplementary_material [file attachment]

Hypothesis

0: Start of execution: Beginning Search

1: Searching: query

2: Searching: player\_shot\_with\_left\_foot(klaas\_jan\_huntelaar)

3: Searching: can\_perform(klaas\_jan\_huntelaar, shot, left\_foot)

4: Searching: soccer\_move(klaas\_jan\_huntelaar, shot, left\_foot)

5: Found: soccer\_move(klaas\_jan\_huntelaar, shot, left\_foot)

6: Found: can\_perform(klaas\_jan\_huntelaar, shot, left\_foot)

7: Found: player\_shot\_with\_left\_foot(klaas\_jan\_huntelaar)

8: Found: query | {'Result': 'query'}

[Path 1]:

Reference
