# Supplementary material
Source: ML conference proceedings conference paper supplement (https://openreview.net/forum?id=awtd0XhzKQ)
Supplement: supplementary_material [file attachment]

Hypothesis

[Path 1]:  
0: Start of execution: Beginning Search  
1: Searching: query(Candidate Variable\_0)  
2: Searching: query\_days\_to\_surpass\_window(Candidate Variable\_0)  
3: Searching: days\_to\_surpass\_window(4, 20, Candidate Variable\_0)  
4: Searching: 4<20  
5: Found: 4<20  
6: Searching: \_16348 is 4\*2  
7: Found: 8 is 4\*2  
8: Searching: days\_to\_surpass\_window(8, 20, Candidate Variable\_1)  
9: Searching: 8<20  
10: Found: 8<20  
11: Searching: \_19422 is 8\*2  
12: Found: 16 is 8\*2  
13: Searching: days\_to\_surpass\_window(16, 20, Candidate Variable\_2)  
14: Searching: 16<20  
15: Found: 16<20  
16: Searching: \_22496 is 16\*2  
17: Found: 32 is 16\*2  
18: Searching: days\_to\_surpass\_window(32, 20, Candidate Variable\_3)  
19: Searching: 32<20  
20: Fail: 32<20 | {'Result': 'Search Failed'}  
Looking for other paths: Redo: days\_to\_surpass\_window(32, 20, Candidate Variable\_3)  
[Path 2]:  
21: Searching: 32>=20  
22: Found: 32>=20  
23: Found: days\_to\_surpass\_window(32, 20, 0)  
24: Searching: \_20654 is 0+1  
25: Found: 1 is 0+1  
26: Found: days\_to\_surpass\_window(16, 20, 1)  
27: Searching: \_17580 is 1+1  
28: Found: 2 is 1+1  
29: Found: days\_to\_surpass\_window(8, 20, 2)  
30: Searching: \_5830 is 2+1  
31: Found: 3 is 2+1  
32: Found: days\_to\_surpass\_window(4, 20, 3)  
33: Found: query\_days\_to\_surpass\_window(3)  
34: Found: query(3) | {'Result': 'Answer = 3'}  
Looking for other paths: Redo: days\_to\_surpass\_window(16, 20, Candidate Variable\_2)  
[Path 3]:  
35: Searching: 16>=20  
36: Fail: 16>=20 | {'Result': 'Search Failed'}  
37: Fail: days\_to\_surpass\_window(16, 20, Candidate Variable\_2) | {'Result': 'Search Failed'}  
Looking for other paths: Redo: days\_to\_surpass\_window(8, 20, Candidate Variable\_1)  
[Path 4]:  
38: Searching: 8>=20  
39: Fail: 8>=20 | {'Result': 'Search Failed'}  
40: Fail: days\_to\_surpass\_window(8, 20, Candidate Variable\_1) | {'Result': 'Search Failed'}  
Looking for other paths: Redo: days\_to\_surpass\_window(4, 20, Candidate Variable\_0)  
[Path 5]:  
41: Searching: 4>=20  
42: Fail: 4>=20 | {'Result': 'Search Failed'}  
43: Fail: days\_to\_surpass\_window(4, 20, Candidate Variable\_0) | {'Result': 'Search Failed'}  
44: Fail: query\_days\_to\_surpass\_window(Candidate Variable\_0) | {'Result': 'Search Failed'}  
45: Fail: query(Candidate Variable\_0) | {'Result': 'Search Failed'}

[Path 1]:

0: Start of execution: Beginning Search  
1: Searching: query(Candidate Variable\_0)  
2: Searching: query\_days\_to\_surpass\_window(Candidate Variable\_0)  
3: Searching: days\_to\_surpass\_window(4, 20, Candidate Variable\_0)  
4: Searching: 4 < 20  
5: Searching: \_15130 is 4\*2  
6: Found: 8 is 4\*2  
7: Searching: days\_to\_surpass\_window(8, 20, Candidate Variable\_1)  
8: Searching: 8 < 20  
9: Searching: \_16356 is 8\*2  
10: Found: 16 is 8\*2  
11: Searching: days\_to\_surpass\_window(16, 20, Candidate Variable\_2)  
12: Searching: 16 < 20  
13: Searching: \_5834 is 16\*2  
14: Found: 32 is 16\*2  
15: Searching: days\_to\_surpass\_window(32, 20, Candidate Variable\_3)  
16: Found: days\_to\_surpass\_window(32, 20, 0)  
17: Found: days\_to\_surpass\_window(16, 20, 1)  
18: Found: days\_to\_surpass\_window(8, 20, 2)  
19: Found: days\_to\_surpass\_window(4, 20, 3)  
20: Found: query\_days\_to\_surpass\_window(3)  
21: Found: query(3) | {'Result': 'Answer = 3'}

Reference
