# Supplementary material
Source: ML conference proceedings conference paper supplement (https://openreview.net/forum?id=awtd0XhzKQ)
Supplement: supplementary_material [file attachment]

Hypothesis

[Path 1]:

0: Start of execution: Beginning Search

1: Searching: query(Candidate Variable\_0)

2: Searching: total\_points\_scored(9, 3, 2, Candidate Variable\_0)

3: Searching: \_14520 is 9-3

4: Found: 6 is 9-3

5: Searching: \_5830 is 6\*2

6: Found: 12 is 6\*2

7: Found: total\_points\_scored(9, 3, 2, 12)

8: Found: query(12) | {'Result': 'TotalPoints = 12'}

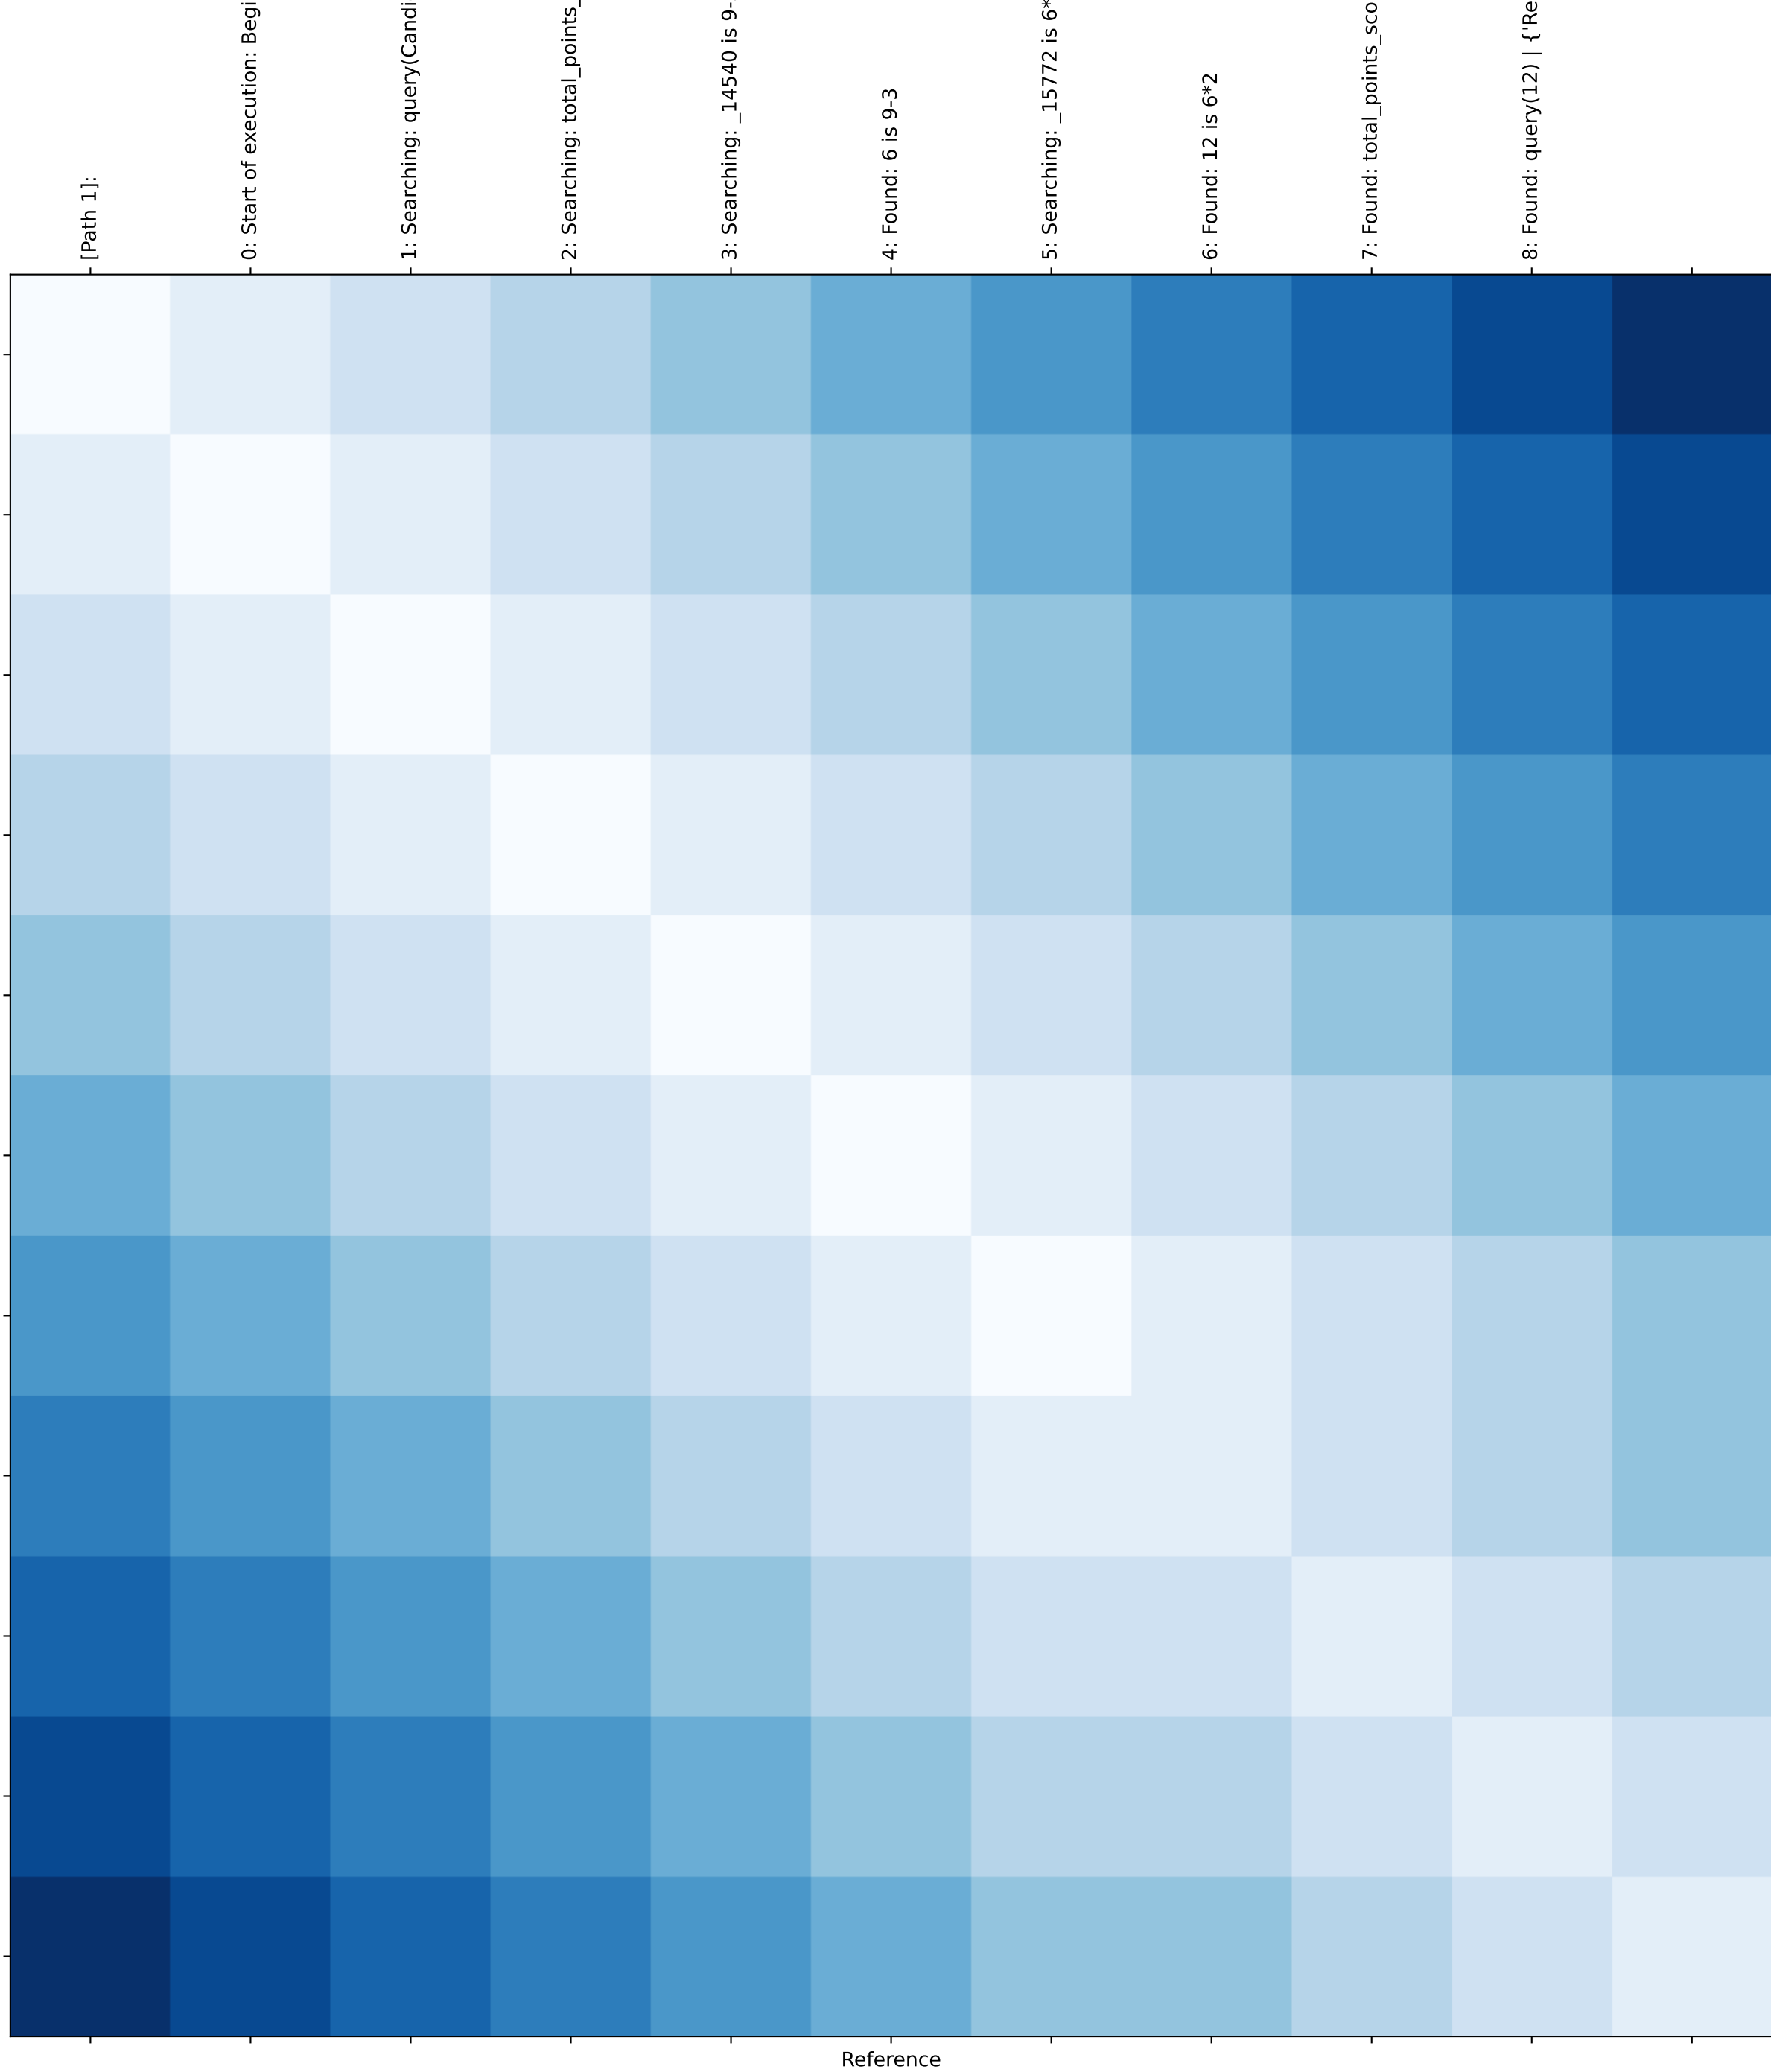

Reference
