# Supplementary material
Source: ML conference proceedings conference paper supplement (https://openreview.net/forum?id=awtd0XhzKQ)
Supplement: supplementary_material [file attachment]

Hypothesis

[Path 1]:

0: Start of execution: Beginning Search

1: Searching: query

2: Searching: have\_different\_musical\_passions

3: Searching: different\_musical\_passions(classical\_music, none)

4: Searching: squidward\_musical\_interests(Candidate Variable\_0)

5: Found: squidward\_musical\_interests(classical\_music)

6: Searching: alan\_greenSPAN\_musical\_interests(Candidate Variable\_1)

7: Found: alan\_greenSPAN\_musical\_interests(none)

8: Searching: classical\_music\=none

9: Found: classical\_music\=none

10: Found: different\_musical\_passions(classical\_music, none)

11: Found: have\_different\_musical\_passions

12: Found: query | {'Result': 'Yes'}

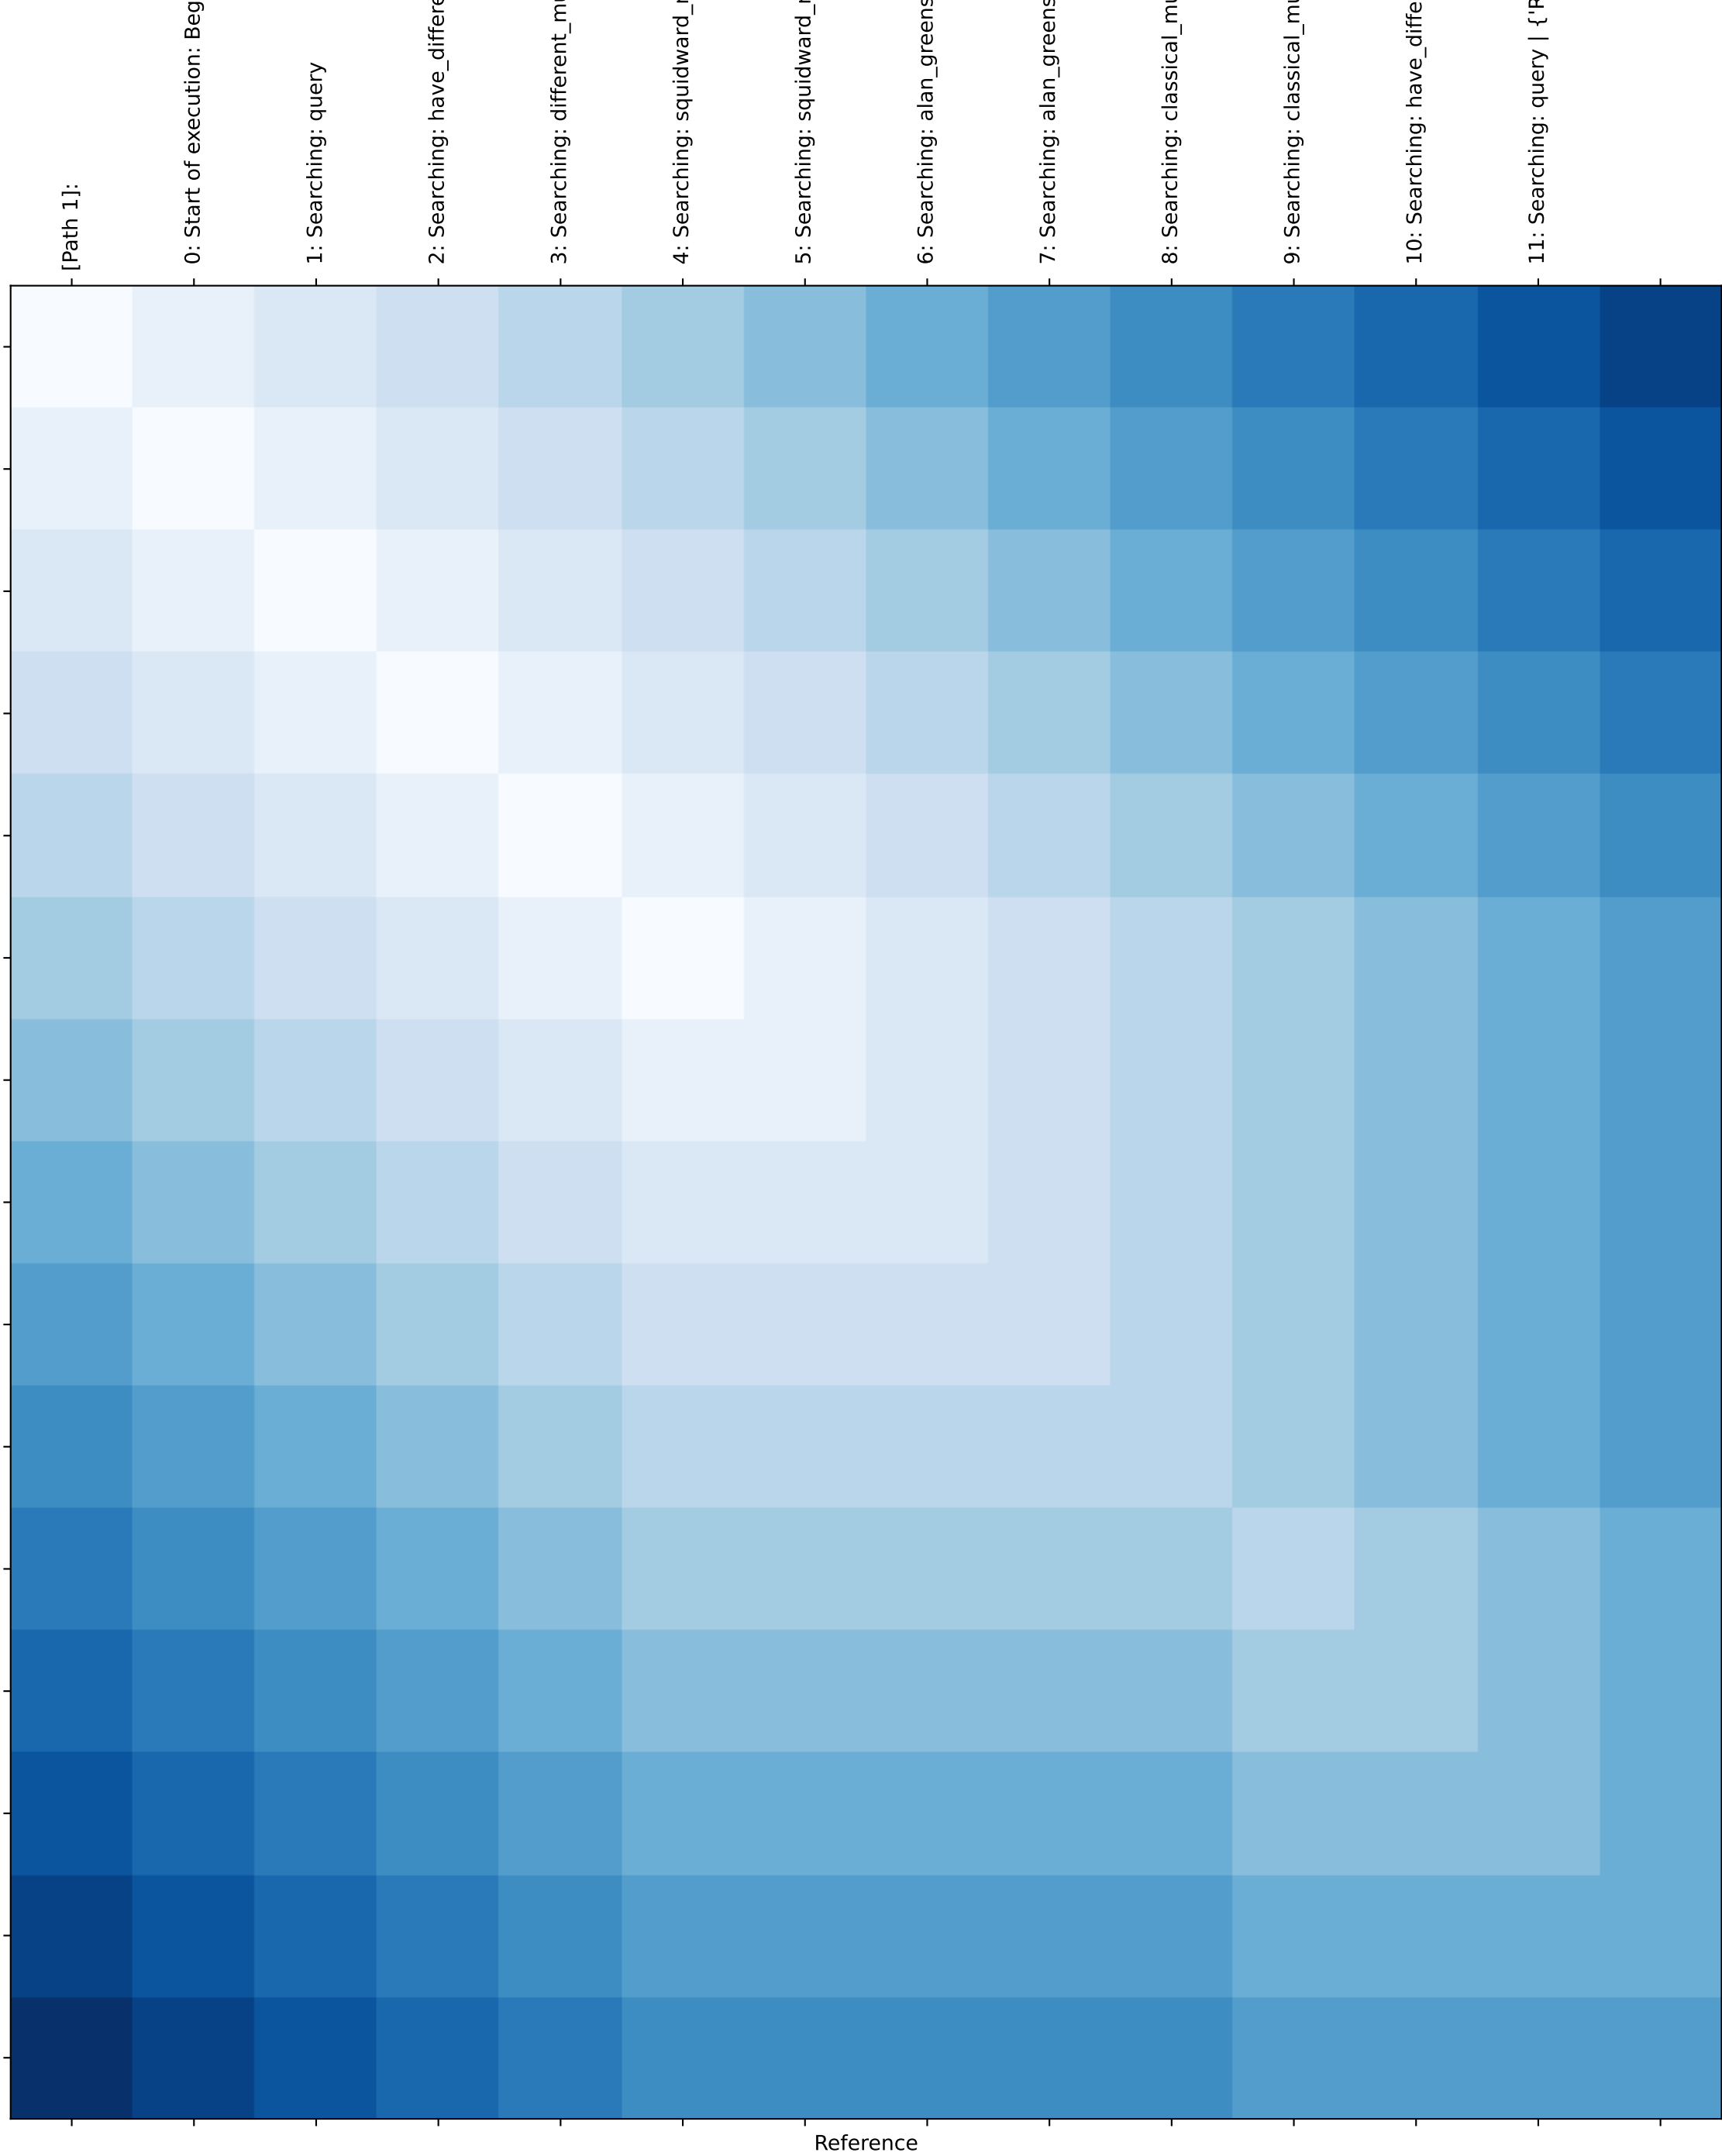

Reference
