# Supplementary material
Source: ML conference proceedings conference paper supplement (https://openreview.net/forum?id=awtd0XhzKQ)
Supplement: supplementary_material [file attachment]

Hypothesis

16: Found: query(9) | {'Result': 'Packages = 9'}

15: Found: total\_packages(9)

14: Found: 9 is 45//5

13: Searching: \_5830 is 45//5

12: Found: cupcakes\_per\_package(5)

11: Searching: cupcakes\_per\_package(Candidate Variable\_4)

10: Found: remaining\_cupcakes(45)

9: Found: 45 is 50-5

8: Searching: \_14508 is 50-5

7: Found: todd\_ate(5)

6: Searching: todd\_ate(Candidate Variable\_3)

5: Found: initial\_cupcakes(50)

4: Searching: initial\_cupcakes(Candidate Variable\_2)

3: Searching: remaining\_cupcakes(Candidate Variable\_1)

2: Searching: total\_packages(Candidate Variable\_0)

1: Searching: query(Candidate Variable\_0)

0: Start of execution: Beginning Search

[Path 1]:

[Path 1]:

0: Start of execution: Beginning Search

1: Searching: query(Candidate Variable\_0)

2: Searching: total\_packages(Candidate Variable\_0)

3: Searching: remaining\_cupcakes(Candidate Variable\_1)

4: Searching: initial\_cupcakes(Candidate Variable\_2)

5: Found: initial\_cupcakes(50)

6: Searching: todd\_ate(Candidate Variable\_3)

7: Found: todd\_ate(5)

8: Searching: \_15734 is 50-5

9: Found: 45 is 50-5

10: Found: remaining\_cupcakes(45)

11: Searching: cupcakes\_per\_package(Candidate Variable\_4)

12: Found: cupcakes\_per\_package(5)

13: Searching: \_5834 is 45//5

14: Found: 9 is 45//5

15: Found: total\_packages(9)

16: Found: query(9) | {'Result': 'Packages = 9'}

Reference
