# Supplementary material
Source: ML conference proceedings conference paper supplement (https://openreview.net/forum?id=awtd0XhzKQ)
Supplement: supplementary_material [file attachment]

Hypothesis

0: Start of execution: Beginning Search

1: Searching: query

2: Searching: do\_skeletons\_have\_hair((false, true))

3: Searching: direct\_component\_of\_skeleton(hair, Candidate Variable\_0)

4: Found: direct\_component\_of\_skeleton(hair, false)

5: Searching: indirect\_relationship\_with\_skeleton(hair, Candidate Variable\_1)

6: Found: indirect\_relationship\_with\_skeleton(hair, true)

7: Searching:

8: Found:

9: Found: do\_skeletons\_have\_hair((false, true))

10: Found: query | {'Result': 'Yes'}

[Path 1]:

0: Start of execution: Beginning Search

1: Searching: query

2: Searching: do\_skeletons\_have\_hair((false, true))

3: Searching: direct\_component\_of\_skeleton(hair, Candidate Variable\_0)

4: Searching: direct\_component\_of\_skeleton(hair, false)

5: Searching: indirect\_relationship\_with\_skeleton(hair, Candidate Variable\_1)

6: Searching: indirect\_relationship\_with\_skeleton(hair, true)

7: Searching: Answer = (false)

8: Searching: do\_skeletons\_have\_hair((false, true))

9: Searching: query | {'Result': 'Yes'}

Reference
