# Supplementary material
Source: ML conference proceedings conference paper supplement (https://openreview.net/forum?id=awtd0XhzKQ)
Supplement: supplementary_material [file attachment]

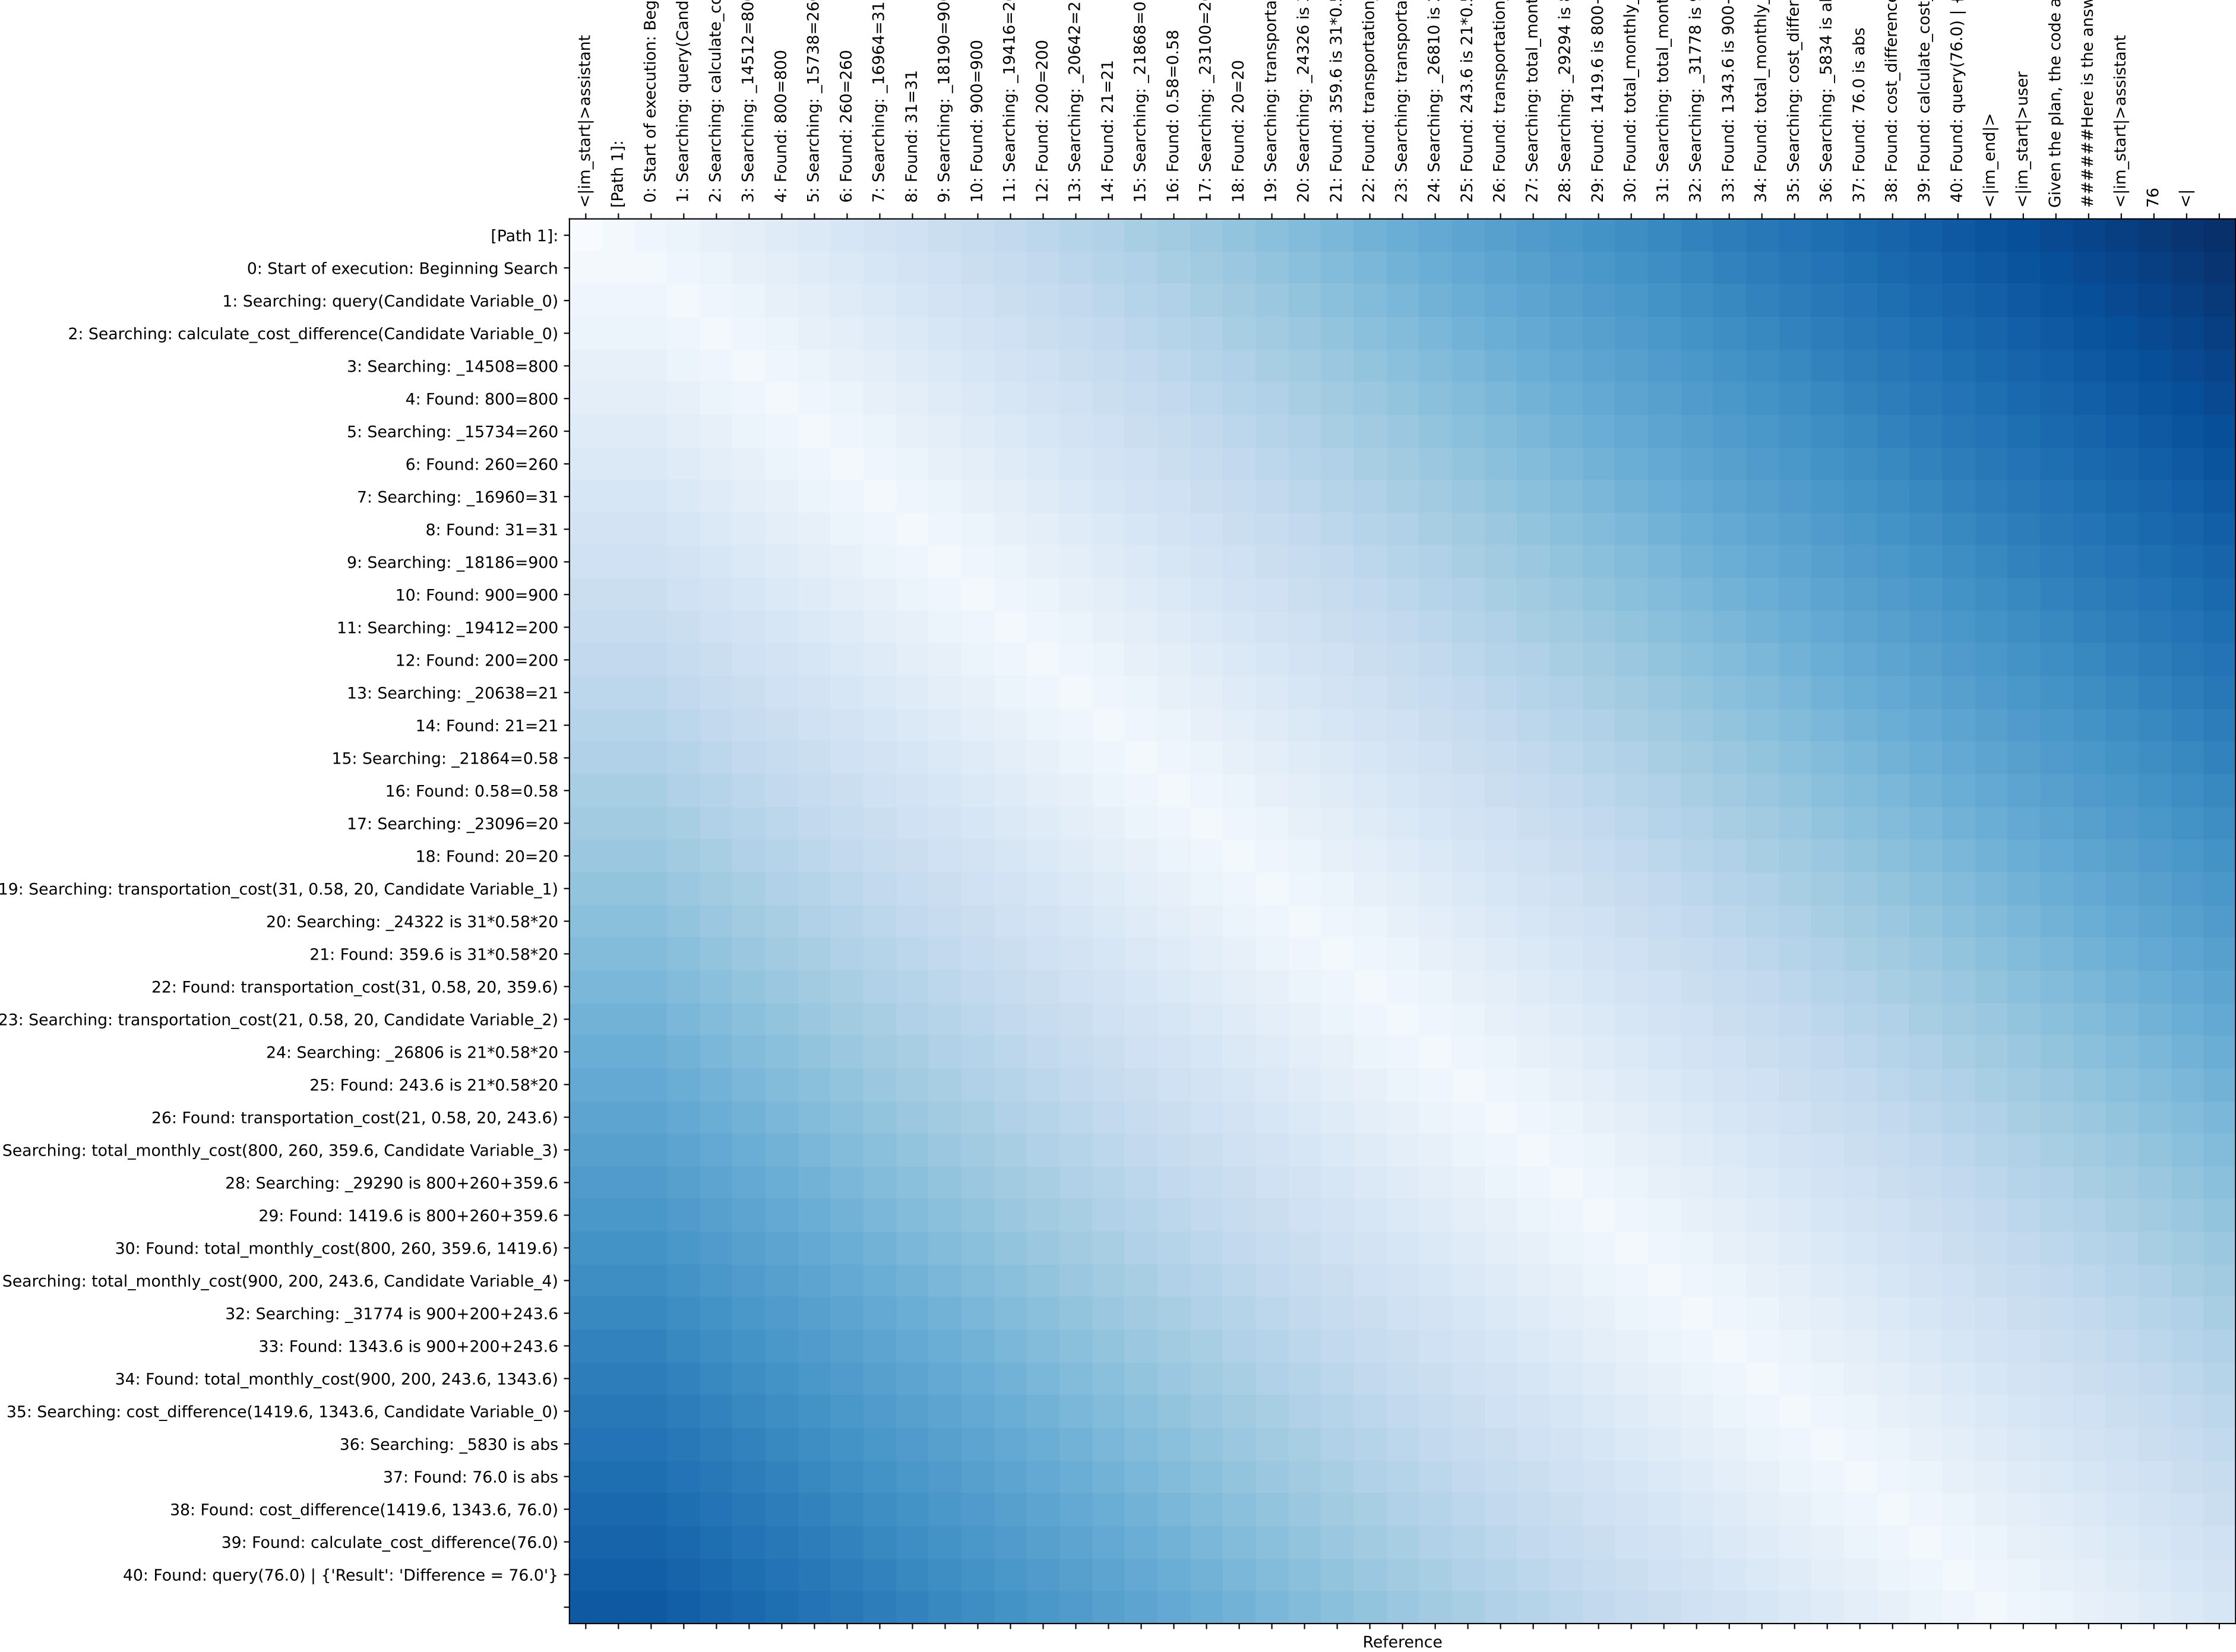

<|jim\_start|>assistant  
[Path 1]:

0: Start of execution: Beginning Search  
1: Searching: query(Candidate Variable\_0)  
2: Searching: calculate\_cost\_difference(Candidate Variable\_0)  
3: Searching: \_14508=800  
4: Found: 800=800  
5: Searching: \_15734=260  
6: Found: 260=260  
7: Searching: \_16960=31  
8: Found: 31=31  
9: Searching: \_18186=900  
10: Found: 900=900  
11: Searching: \_19412=200  
12: Found: 200=200  
13: Searching: \_20642=21  
14: Found: 21=21  
15: Searching: \_21868=0.58  
16: Found: 0.58=0.58  
17: Searching: \_23100=20  
18: Found: 20=20  
19: Searching: transportation\_cost(31, 0.58, 20, Candidate Variable\_1)  
20: Searching: \_24326 is 31\*0.58\*20  
21: Found: 359.6 is 31\*0.58\*20  
22: Found: transportation\_cost(31, 0.58, 20, 359.6)  
23: Searching: transportation\_cost(21, 0.58, 20, Candidate Variable\_2)  
24: Searching: \_26810 is 21\*0.58\*20  
25: Found: 243.6 is 21\*0.58\*20  
26: Found: transportation\_cost(21, 0.58, 20, 243.6)  
27: Searching: total\_monthly\_cost(800, 260, 359.6, Candidate Variable\_3)  
28: Searching: \_29294 is 800+260+359.6  
29: Found: 1419.6 is 800+260+359.6  
30: Found: total\_monthly\_cost(800, 260, 359.6, 1419.6)  
31: Searching: total\_monthly\_cost(900, 200, 243.6, Candidate Variable\_4)  
32: Searching: \_31778 is 900+200+243.6  
33: Found: 1343.6 is 900+200+243.6  
34: Found: total\_monthly\_cost(900, 200, 243.6, 1343.6)  
35: Searching: cost\_difference(1419.6, 1343.6, Candidate Variable\_0)  
36: Searching: \_5834 is abs  
37: Found: 76.0 is abs  
38: Found: cost\_difference(1419.6, 1343.6, 76.0)  
39: Found: calculate\_cost\_difference(76.0)  
40: Found: query(76.0) | {'Result': 'Difference = 76.0'}  
<|jim\_end|>  
<|jim\_start|>user  
Given the plan, the code a  
#####Here is the answer  
<|jim\_start|>assistant  
76  
<|

Reference
