# Supplementary material
Source: ML conference proceedings conference paper supplement (https://openreview.net/forum?id=awtd0XhzKQ)
Supplement: supplementary_material [file attachment]

Hypothesis

0: Start of execution: Beginning Search  
1: Searching: query  
2: Searching: feel different at funerals  
3: Searching: effect(Candidate Variable 0)  
4: Found: effect(removal of bodily fluids)  
5: Searching: tactile experience(Candidate Variable 1)  
6: Found: tactile experience(stiffness)  
7: Searching: different tactile experience(embalmed bodies)  
8: Found: different tactile experience(embalmed bodies)  
9: Found: feel different at funerals  
10: Found: query | {'Result': 'Yes'}  
Looking for other paths: Redo: tactile\_experience(Candidate Variable 2)  
11: Found: tactile\_experience(coolness)  
12: Searching: different tactile experience(embalmed bodies)  
13: Found: different tactile experience(embalmed bodies)  
14: Found: feel different at funerals  
15: Found: query | {'Result': 'Yes'}  
Looking for other paths: Redo: tactile\_experience(Candidate Variable 3)  
16: Found: tactile\_experience(appearance of skin)  
17: Searching: different tactile experience(embalmed bodies)  
18: Found: different tactile experience(embalmed bodies)  
19: Found: feel different at funerals  
20: Found: query | {'Result': 'Yes'}  
Looking for other paths: Redo: effect(Candidate Variable 4)  
21: Found: effect(introduction of embalming fluid)  
22: Searching: tactile\_experience(Candidate Variable 5)  
23: Found: tactile\_experience(stiffness)  
24: Searching: different tactile experience(embalmed bodies)  
25: Found: different tactile experience(embalmed bodies)  
26: Found: feel different at funerals  
27: Found: query | {'Result': 'Yes'}  
Looking for other paths: Redo: tactile\_experience(Candidate Variable 6)  
28: Found: tactile\_experience(coolness)  
29: Searching: different tactile experience(embalmed bodies)  
30: Found: different tactile experience(embalmed bodies)  
31: Found: feel different at funerals  
32: Found: query | {'Result': 'Yes'}  
Looking for other paths: Redo: tactile\_experience(Candidate Variable 7)  
33: Found: tactile\_experience(appearance of skin)  
34: Searching: different tactile experience(embalmed bodies)  
35: Found: different tactile experience(embalmed bodies)  
36: Found: feel different at funerals  
37: Found: query | {'Result': 'Yes'}  
Looking for other paths: Redo: effect(Candidate Variable 8)  
38: Found: effect(alteration of skin texture)  
39: Searching: tactile\_experience(Candidate Variable 9)  
40: Found: tactile\_experience(stiffness)  
41: Searching: different tactile experience(embalmed bodies)  
42: Found: different tactile experience(embalmed bodies)  
43: Found: feel different at funerals  
44: Found: query | {'Result': 'Yes'}  
Looking for other paths: Redo: tactile\_experience(Candidate Variable 10)  
45: Found: tactile\_experience(coolness)  
46: Searching: different tactile experience(embalmed bodies)  
47: Found: different tactile experience(embalmed bodies)  
48: Found: feel different at funerals  
49: Found: query | {'Result': 'Yes'}  
Looking for other paths: Redo: tactile\_experience(Candidate Variable 11)  
50: Found: tactile\_experience(appearance of skin)  
51: Searching: different tactile experience(embalmed bodies)  
52: Found: different tactile experience(embalmed bodies)  
53: Found: feel different at funerals  
54: Found: query | {'Result': 'Yes'}  
Looking for other paths: Redo: effect(Candidate Variable 12)  
55: Found: effect(change in body temperature)  
56: Searching: tactile\_experience(Candidate Variable 13)  
57: Found: tactile\_experience(stiffness)  
58: Searching: different tactile experience(embalmed bodies)  
59: Found: different tactile experience(embalmed bodies)  
60: Found: feel different at funerals  
61: Found: query | {'Result': 'Yes'}  
Looking for other paths: Redo: tactile\_experience(Candidate Variable 14)  
62: Found: tactile\_experience(coolness)  
63: Searching: different tactile experience(embalmed bodies)  
64: Found: different tactile experience(embalmed bodies)  
65: Found: feel different at funerals  
66: Found: query | {'Result': 'Yes'}  
Looking for other paths: Redo: tactile\_experience(Candidate Variable 15)  
67: Found: tactile\_experience(appearance of skin)  
68: Searching: different tactile experience(embalmed bodies)  
69: Found: different tactile experience(embalmed bodies)  
70: Found: feel different at funerals  
71: Found: query | {'Result': 'Yes'}

[Path 1]:

0: Start of execution: Beginning Search  
1: Searching: query  
2: Searching: feel different at funerals  
3: Searching: effect(Candidate Variable 0)  
4: Found: effect(removal of bodily fluids)  
5: Searching: tactile experience(Candidate Variable 1)  
6: Found: tactile experience(stiffness)  
7: Searching: different tactile experience(embalmed bodies)  
8: Found: different tactile experience(embalmed bodies)  
9: Found: feel different at funerals  
10: Found: query | {'Result': 'Yes'}  
11: Found: query | {'Result': 'Yes'}

Reference
