# Supplementary material
Source: ML conference proceedings conference paper supplement (https://openreview.net/forum?id=awtd0XhzKQ)
Supplement: supplementary_material [file attachment]

Hypothesis

[Path 1]:

0: Start of execution: Beginning Search

1: Searching: query(Candidate Variable\_0)

2: Searching: query\_total\_trees\_planted(Candidate Variable\_0)

3: Searching: total\_trees\_planted(75, 25, Candidate Variable\_0)

4: Searching: \_5830 is 75+25

5: Found: 100 is 75+25

6: Found: total\_trees\_planted(75, 25, 100)

7: Found: query\_total\_trees\_planted(100)

8: Found: query(100) | {'Result': 'Answer = 100'}

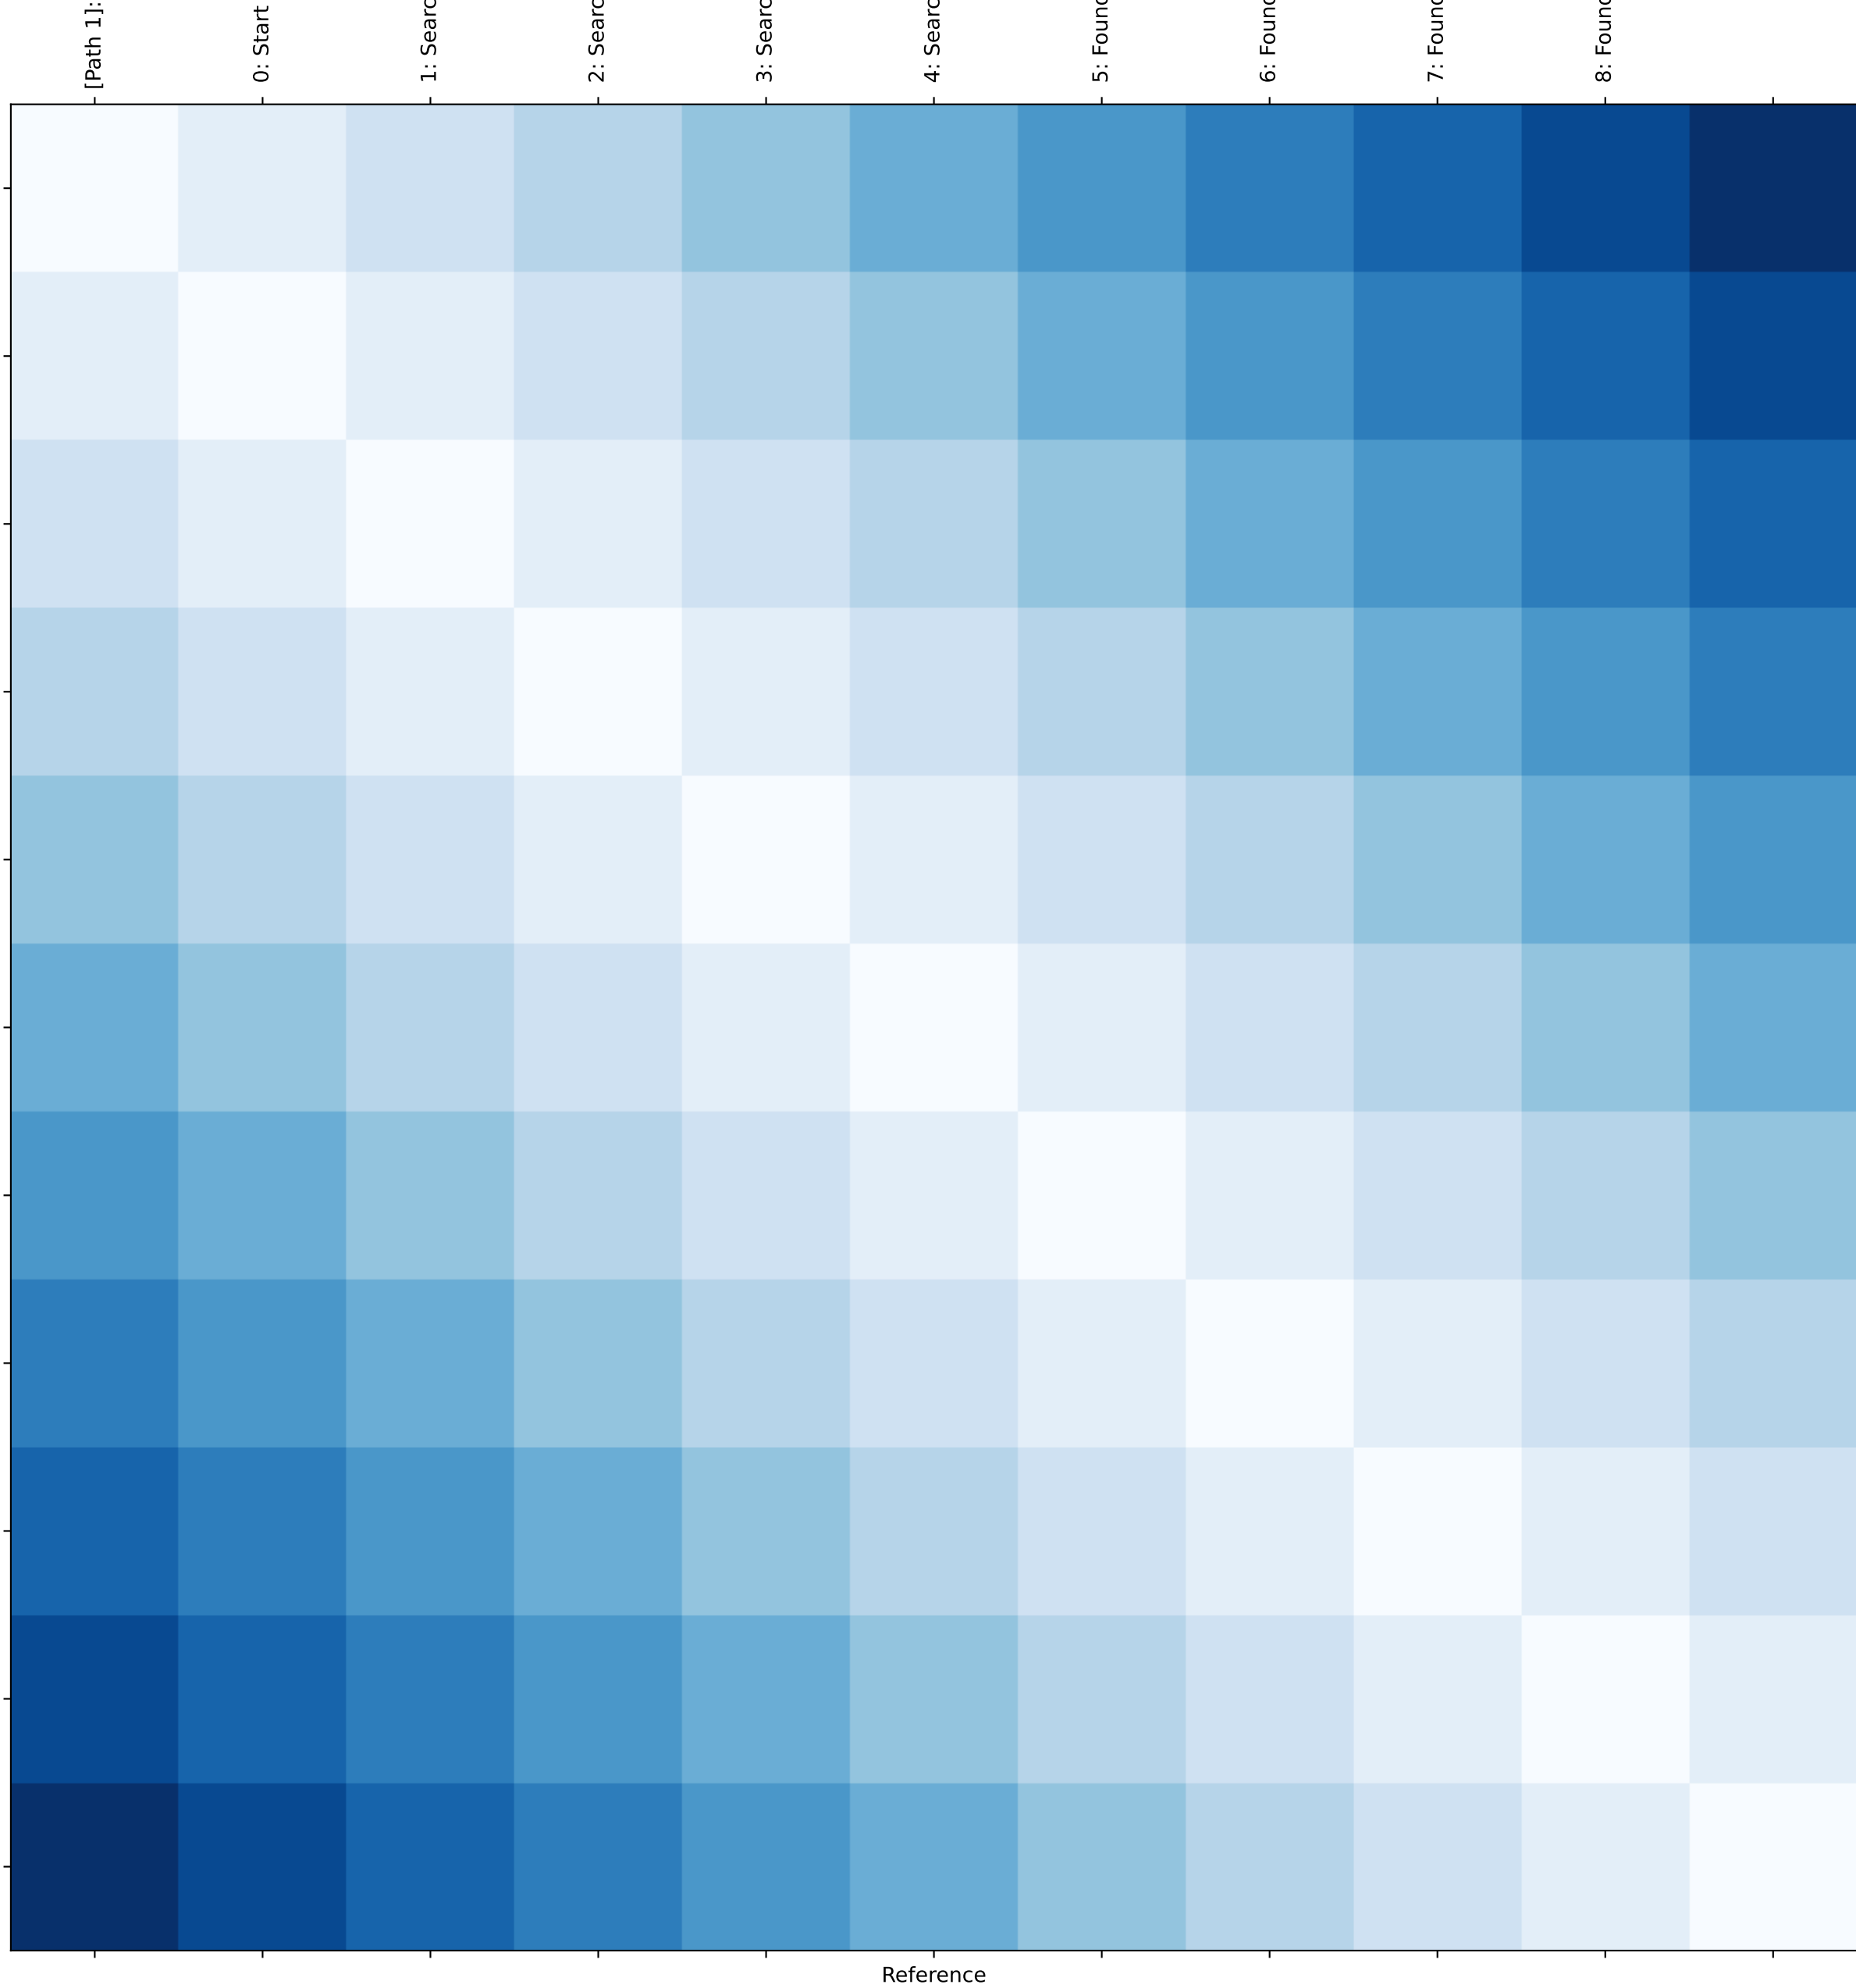

Reference
