# Supplementary material
Source: ML conference proceedings conference paper supplement (https://openreview.net/forum?id=awtd0XhzKQ)

Hypothesis

10: Found: query(1.5) | {'Result': 'X = 1.5'}

9: Found: shorter\_piece(3, 1.5)

8: Found: 1.5 is 3/2

7: Searching: \_7644 is 3/2

6: Found: 3 is 6/2

5: Searching: \_17552 is 6/2

4: Found: 6 is 6

3: Searching: \_16326 is 6

2: Searching: shorter\_piece(3, Candidate Variable\_0)

1: Searching: query(Candidate Variable\_0)

0: Start of execution: Beginning Search

[Path 1]:

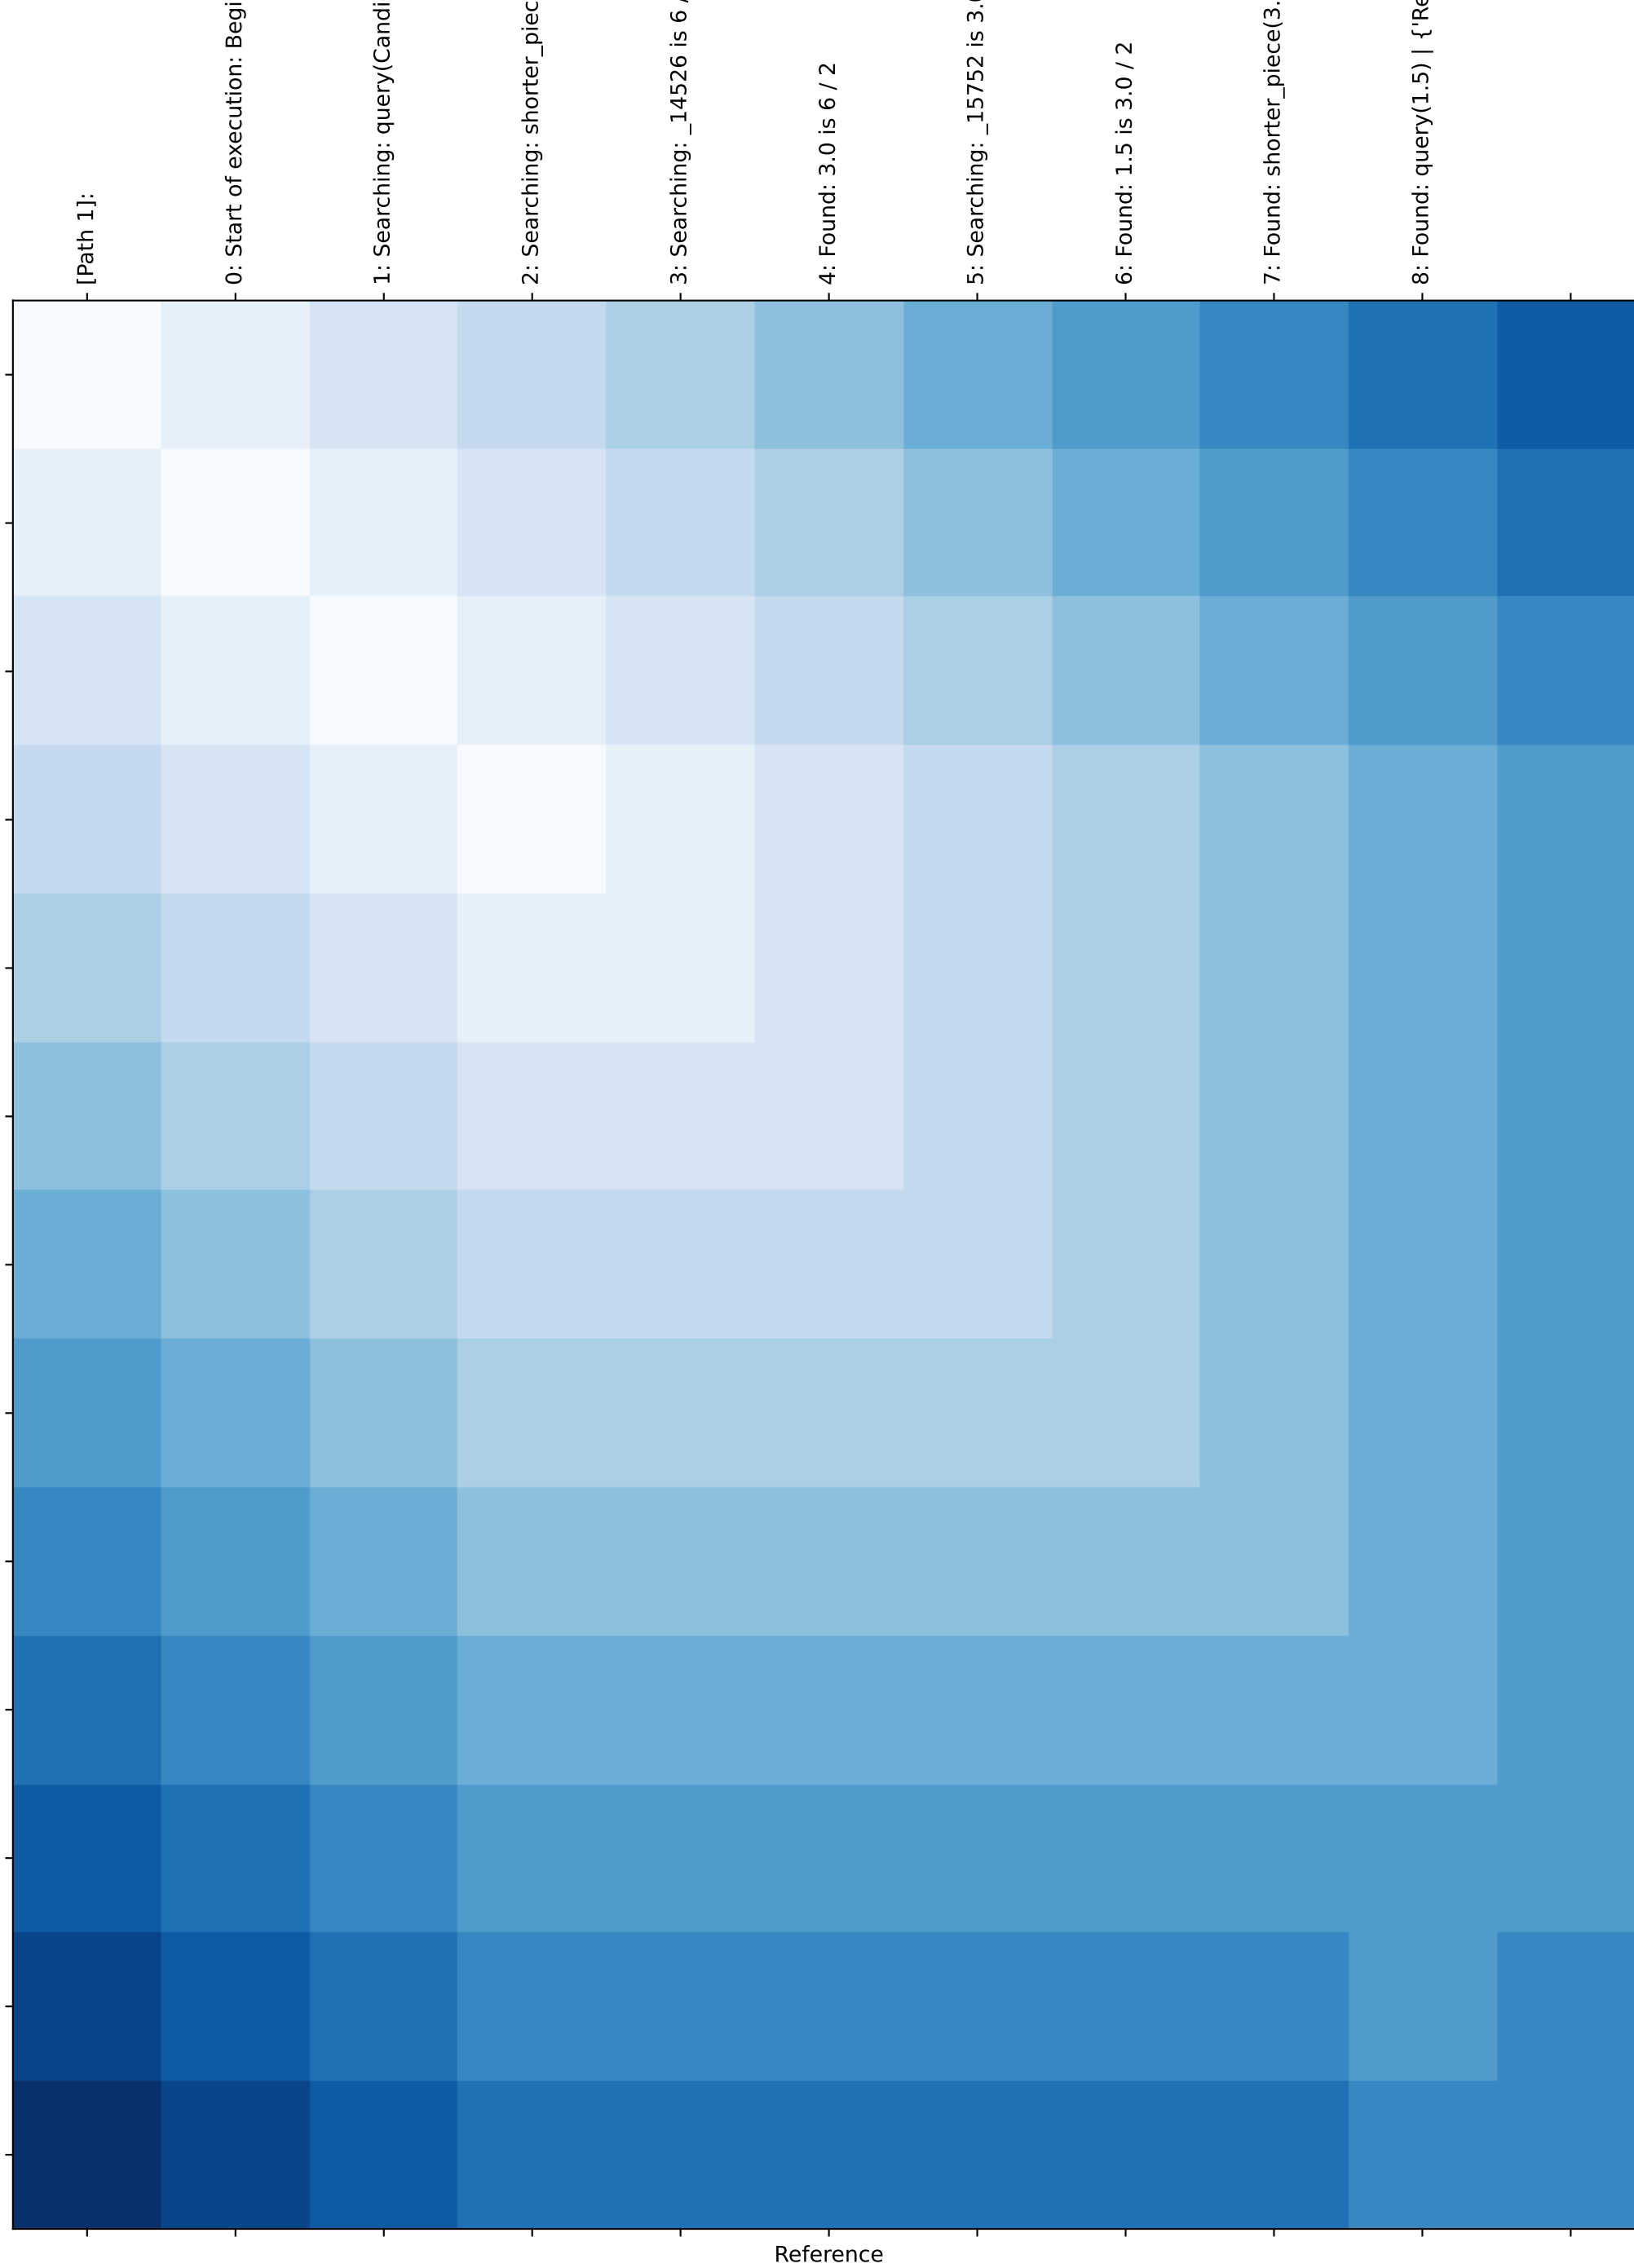

Supplement: supplementary_material [file attachment]
