# Supplementary material
Source: ML conference proceedings conference paper supplement (https://openreview.net/forum?id=awtd0XhzKQ)

Hypothesis

0: Start of execution: Beginning Search

1: Searching: query

2: Searching: cousin(lisa, jamie)

3: Searching: parent(Candidate Variable\_0, lisa)

4: Found: parent(julie, lisa)

5: Searching: parent(Candidate Variable\_1, jamie)

6: Found: parent(carlos, jamie)

7: Searching: sibling(julie, Candidate Variable\_2)

8: Fail: sibling(julie, Candidate Variable\_2) | {'Result': 'Search Failed'}

Looking for other paths: Redo: parent(Candidate Variable\_1, jamie)

[Path 2]:

9: Found: parent(julie, jamie)

10: Searching: sibling(julie, Candidate Variable\_3)

11: Fail: sibling(julie, Candidate Variable\_3) | {'Result': 'Search Failed'}

12: Fail: cousin(lisa, jamie) | {'Result': 'Search Failed'}

13: Fail: query | {'Result': 'Search Failed'}

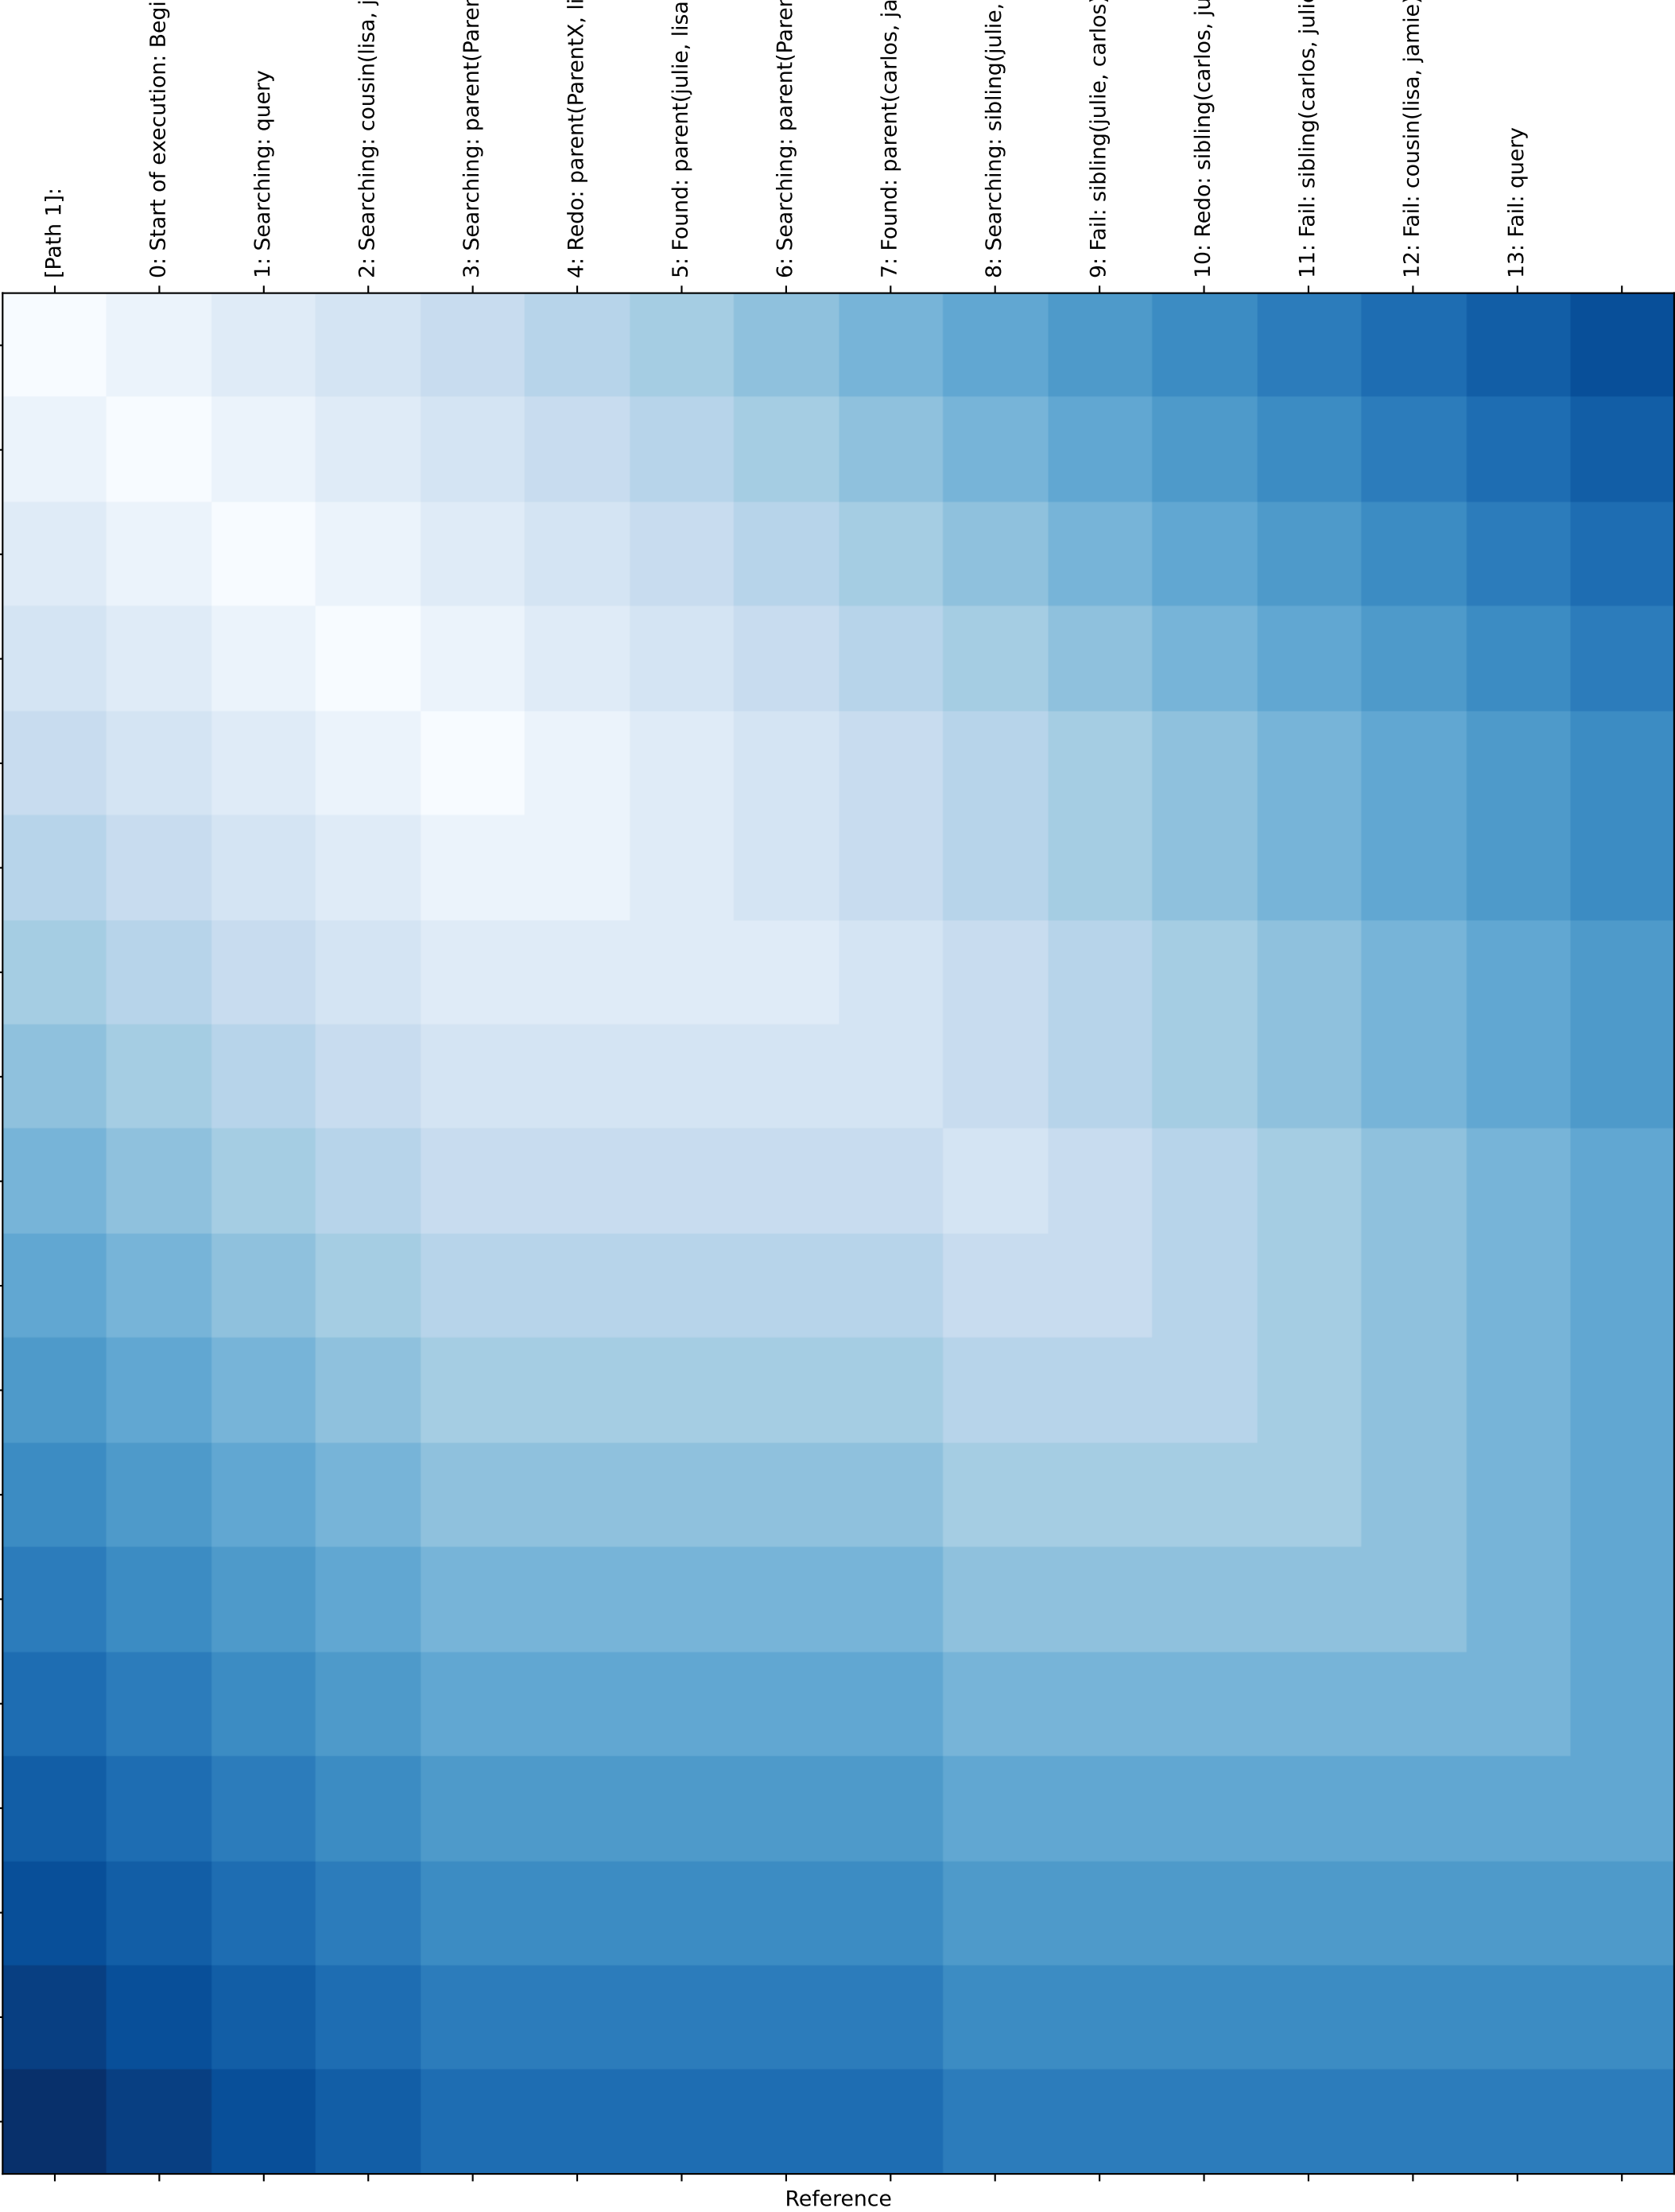

Supplement: supplementary_material [file attachment]
