# Supplementary material
Source: ML conference proceedings conference paper supplement (https://openreview.net/forum?id=awtd0XhzKQ)

Hypothesis

0: Start of execution: Beginning Search

1: Searching: query

2: Searching: earned\_direct\_kick(mario\_gomez)

3: Searching: player\_action(mario\_gomez, earn\_direct\_kick)

4: Found: player\_action(mario\_gomez, earn\_direct\_kick)

5: Found: earned\_direct\_kick(mario\_gomez)

6: Found: query | {'Result': 'query'}

[Path 1]:

Reference

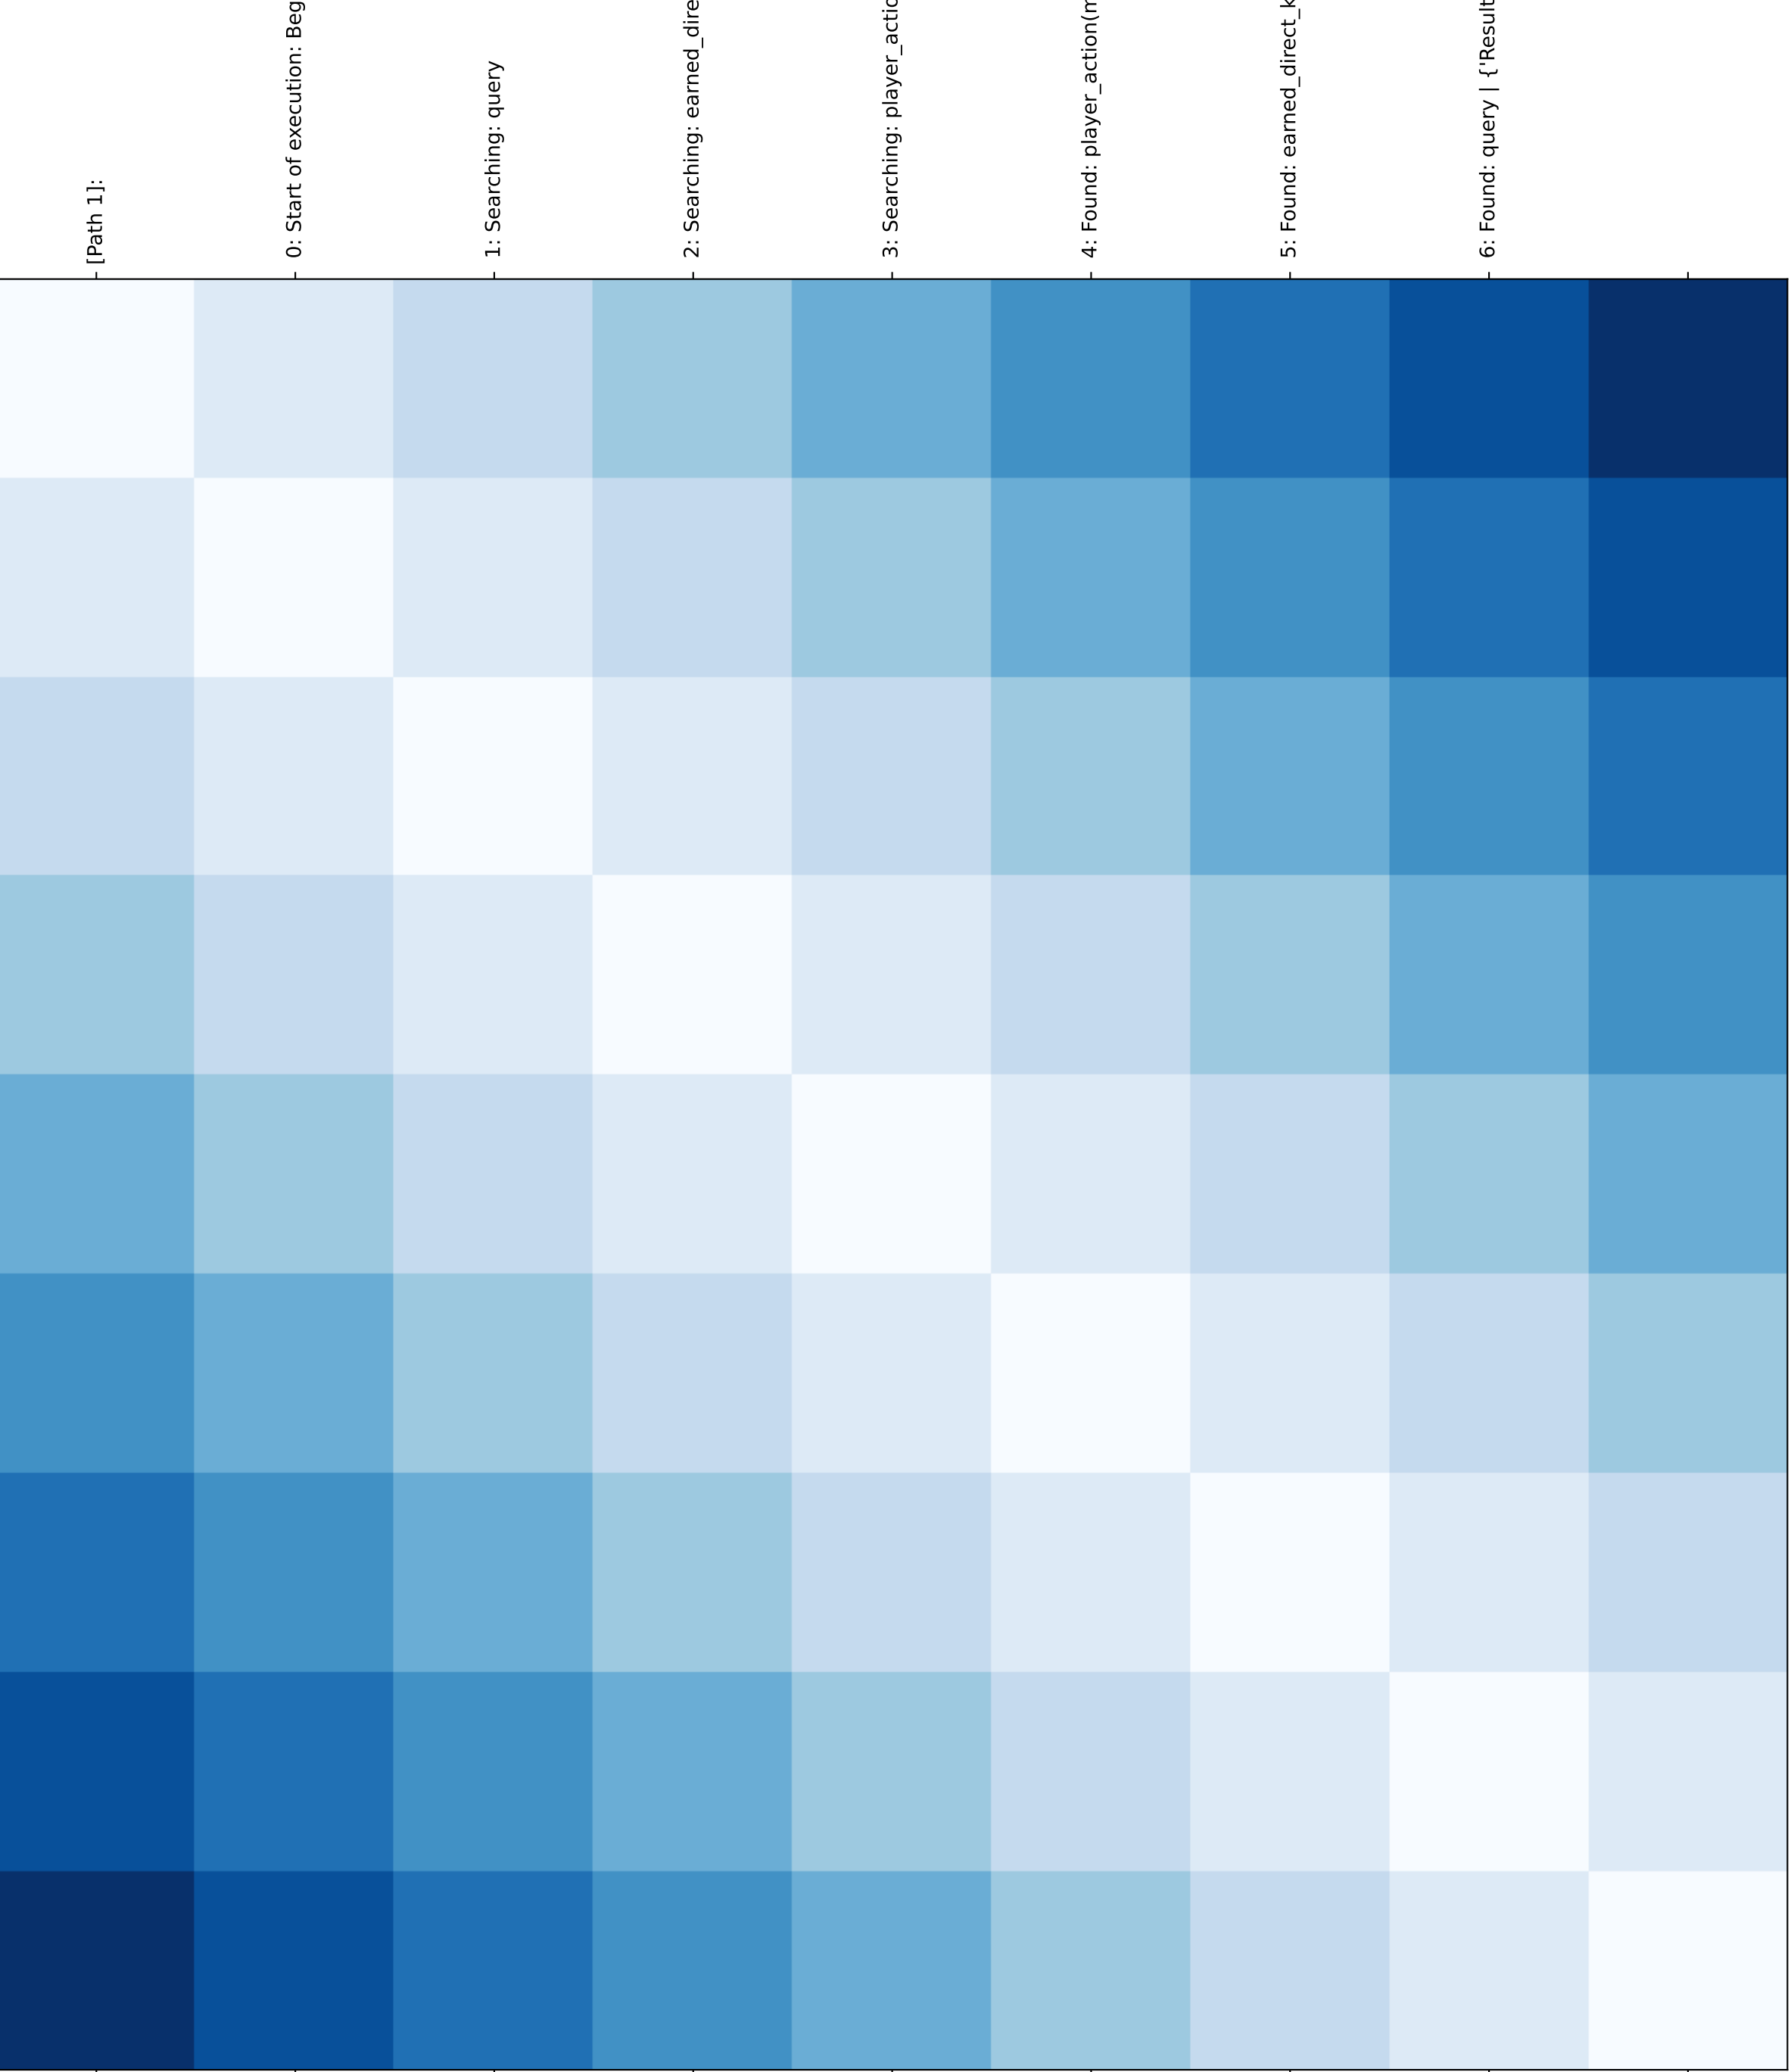

Supplement: supplementary_material [file attachment]
