# Supplementary material
Source: ML conference proceedings conference paper supplement (https://openreview.net/forum?id=awtd0XhzKQ)
Supplement: supplementary_material [file attachment]

```

0: Start of execution: Beginning Search
    1: Searching: query
absent_from_graduation(bruce lee, 1964)
    attended_graduation(bruce lee, 1964, no)
    attended_graduation(bruce lee, 1964, no)
absent_from_graduation(bruce lee, 1964)
    6: Searching: verification possible
    searching: historical_records_available(yes)
    3: Found: historical_records_available(yes)
        9: Found: verification possible
            10: Found: query | {'Result': 'Yes'}
or other paths: Redo: verification possible
                [Path 2]
    searching: biographical_sources_available(yes)
    found: biographical_sources_available(yes)
        13: Found: verification possible
            14: Found: query | {'Result': 'Yes'}

```
