# Supplementary material
Source: ML conference proceedings conference paper supplement (https://openreview.net/forum?id=awtd0XhzKQ)
Supplement: supplementary_material [file attachment]

Hypothesis

[Path 1]:  
0: Start of execution: Beginning Search  
1: Searching: query(Candidate Variable\_0)  
2: Searching: total\_stops(3, 4, Candidate Variable\_0)  
3: Searching: \_5830 is 3+4  
4: Found: 7 is 3+4  
5: Found: total\_stops(3, 4, 7)  
6: Found: query(7) | {'Result': 'Total = 7'}

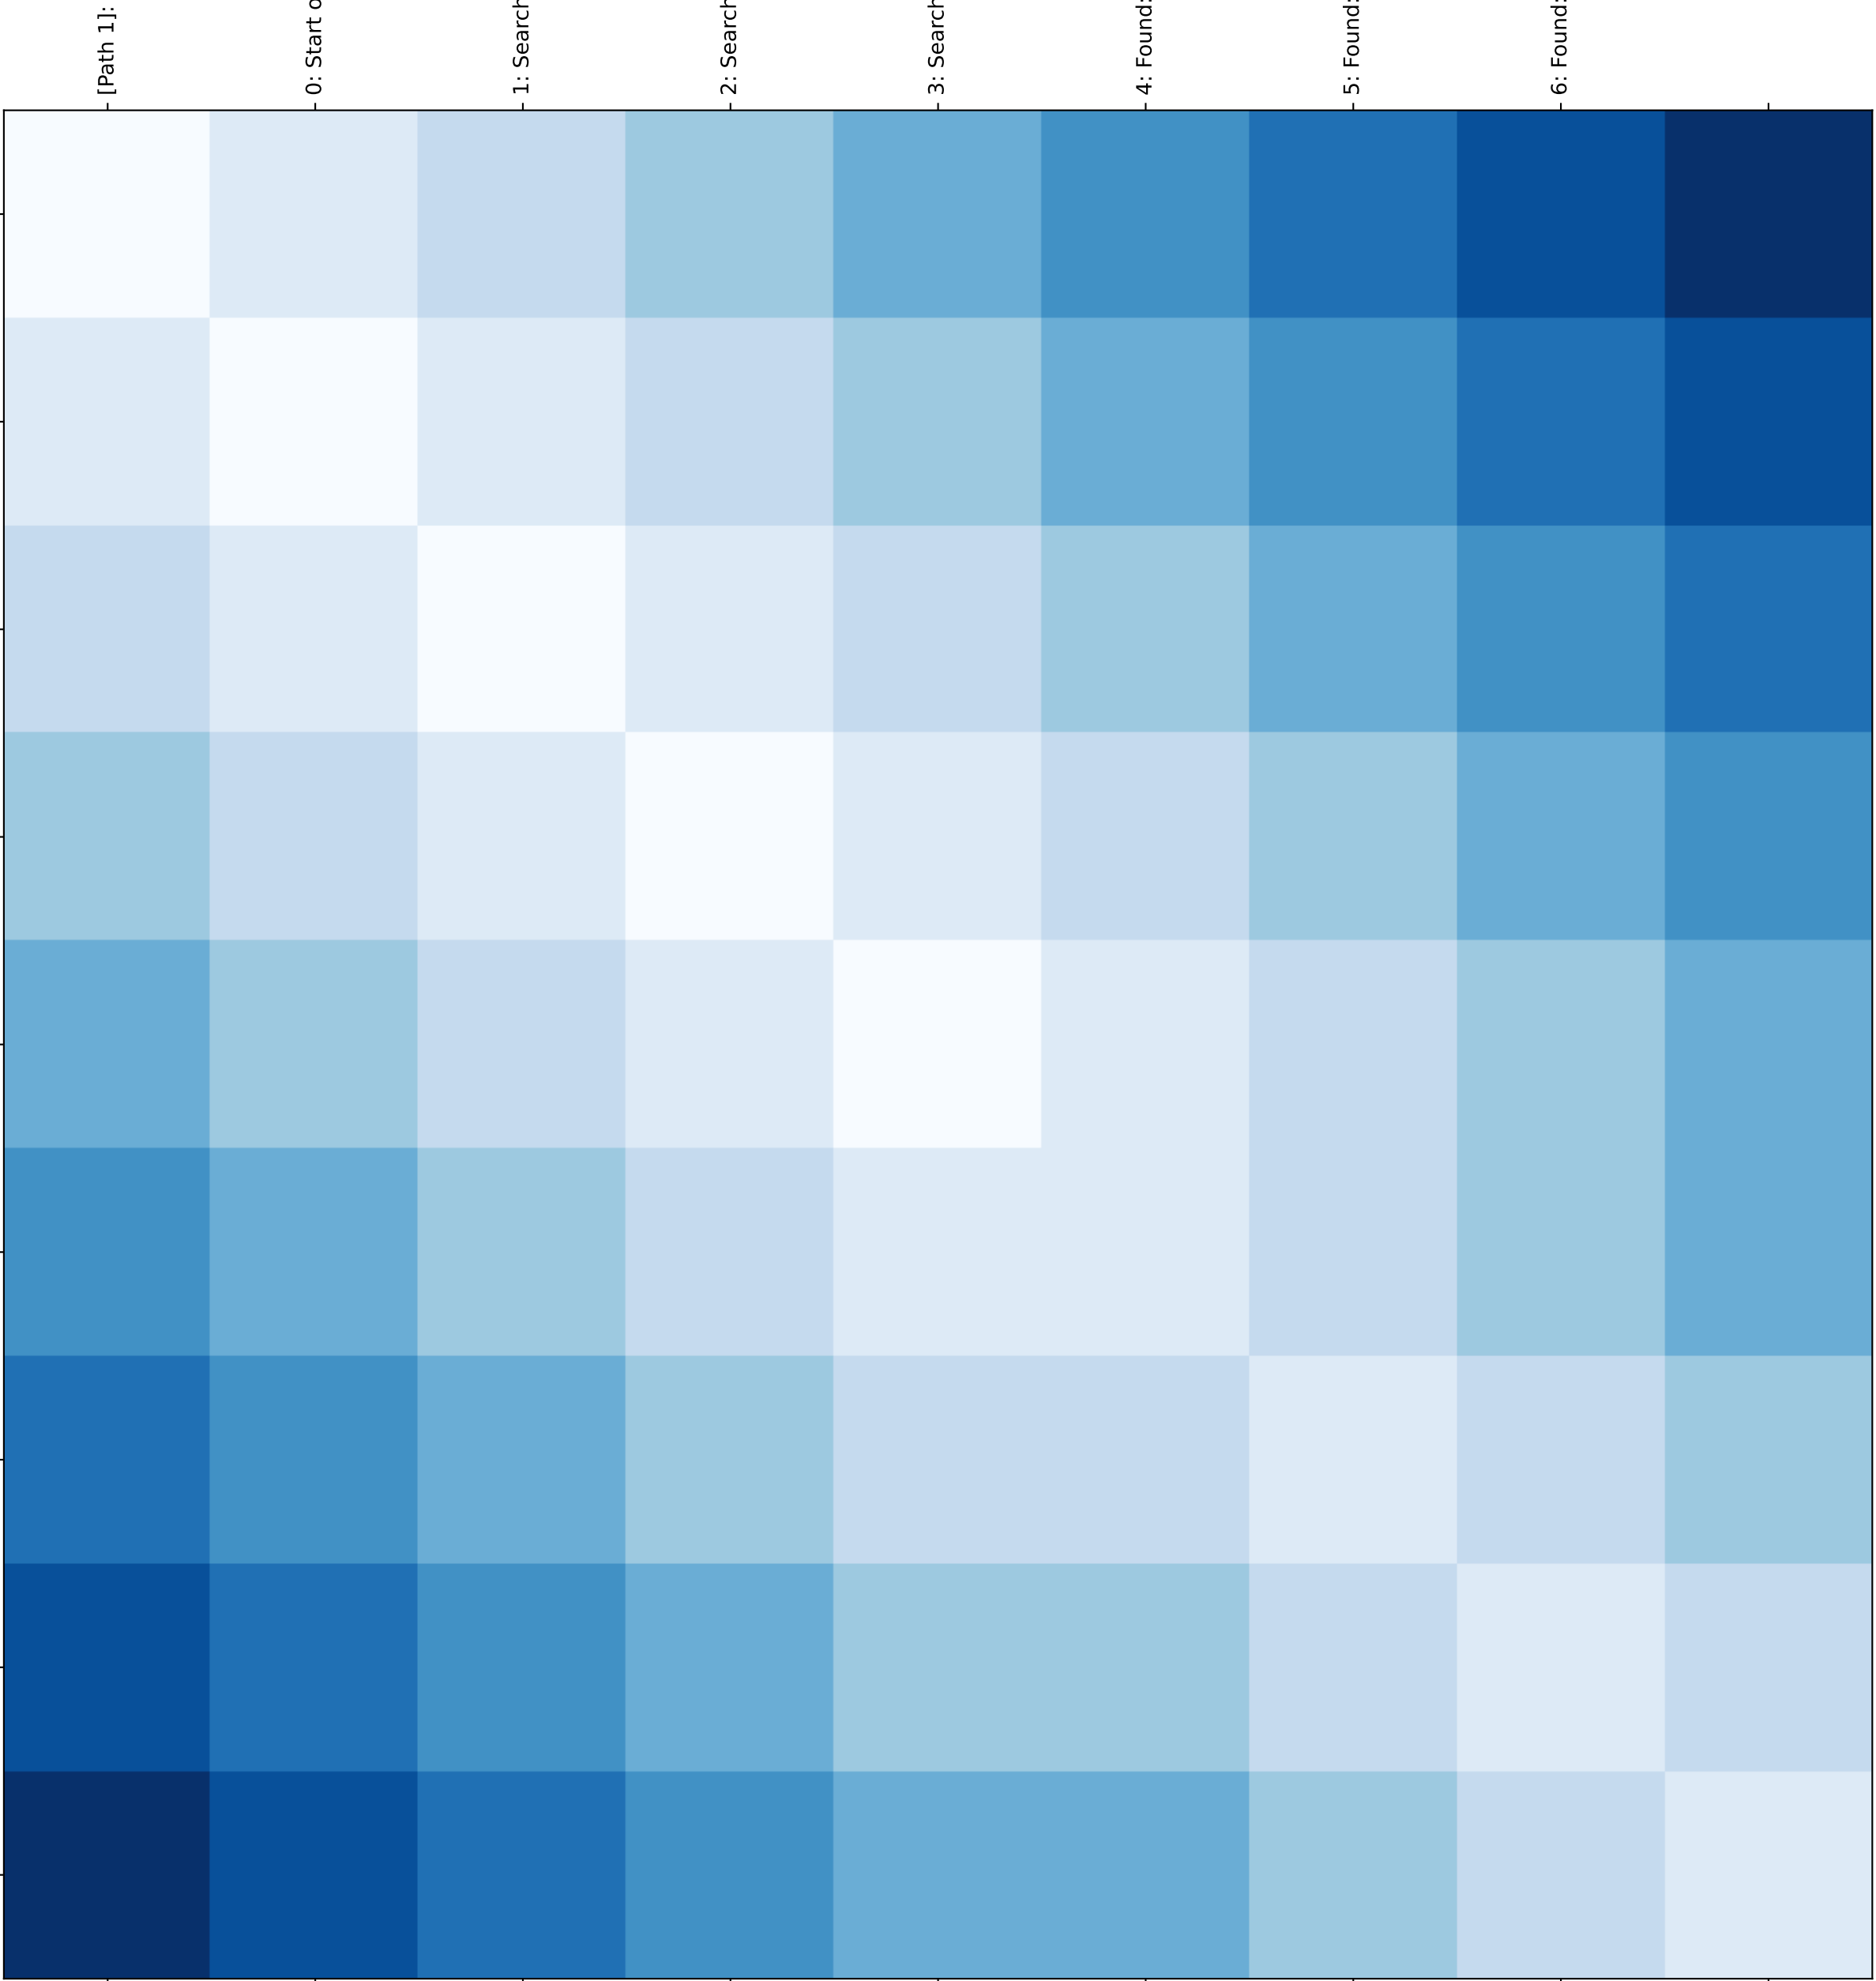

Reference
