# Supplementary material
Source: ML conference proceedings conference paper supplement (https://openreview.net/forum?id=awtd0XhzKQ)
Supplement: supplementary_material [file attachment]

Hypothesis

[Path 1]:

0: Start of execution: Beginning Search

1: Searching: query(Candidate Variable\_0)

2: Searching: cost\_per\_pack(Candidate Variable\_1)

3: Found: cost\_per\_pack(107)

4: Searching: discount(Candidate Variable\_2)

5: Found: discount(106)

6: Searching: total\_money(Candidate Variable\_3)

7: Found: total\_money(93)

8: Searching: buy\_packs(107, 106, 93, Candidate Variable\_0)

9: Searching: \_18174 is 107-106

10: Found: 1 is 107-106

11: Searching: \_5830 is 93/1

12: Found: 93 is 93/1

13: Found: buy\_packs(107, 106, 93, 93)

14: Found: query(93) | {'Result': 'Packs = 93'}

[Path 1]:

0: Start of execution: Beginning Search

1: Searching: query(Candidate Variable\_0)

2: Searching: cost\_per\_pack(Candidate Variable\_1)

3: Found: cost\_per\_pack(107)

4: Searching: discount(Candidate Variable\_2)

5: Found: discount(106)

6: Searching: total\_money(Candidate Variable\_3)

7: Found: total\_money(93)

8: Searching: buy\_packs(107, 106, 93, Candidate Variable\_0)

9: Searching: \_14524 is 107-106

10: Found: 1 is 107-106

11: Searching: \_5834 is 93/1

12: Found: 93 is 93/1

13: Found: buy\_packs(107, 106, 93, 93)

14: Found: query(93) | {'Result': 'Packs = 93'}

Reference
