# Supplementary material
Source: ML conference proceedings conference paper supplement (https://openreview.net/forum?id=awtd0XhzKQ)
Supplement: supplementary_material [file attachment]

0: Start of execution: Beginning Search

1: Searching: query(Candidate Variable\_0)

2: Searching: total\_worksheets(38, 4, Candidate Variable\_0)

3: Searching: 38 is 38+4

4: Found: 38 is 38+4

5: Searching: 38 is 38+4

6: Found: 38 is 38+4

7: Found: total\_worksheets(38, 4, 38)

8: Found: query(38) | {'Result': 'WorksheetsLeft = 38'}

9: Found: query(38) | {'Result': 'WorksheetsLeft = 38'}

Reference
