# Supplementary material
Source: ML conference proceedings conference paper supplement (https://openreview.net/forum?id=awtd0XhzKQ)
Supplement: supplementary_material [file attachment]

Hypothesis

[Path 1]:

0: Start of execution: Beginning Search

1: Searching: query(Candidate Variable\_0)

2: Searching: fill\_shelves(10, 22, 4, Candidate Variable\_0)

3: Searching: \_14520 is 10+22

4: Found: 32 is 10+22

5: Searching: \_5830 is 32//4

6: Found: 8 is 32//4

7: Found: fill\_shelves(10, 22, 4, 8)

8: Found: query(8) | {'Result': 'ShelvesFilled = 8'}

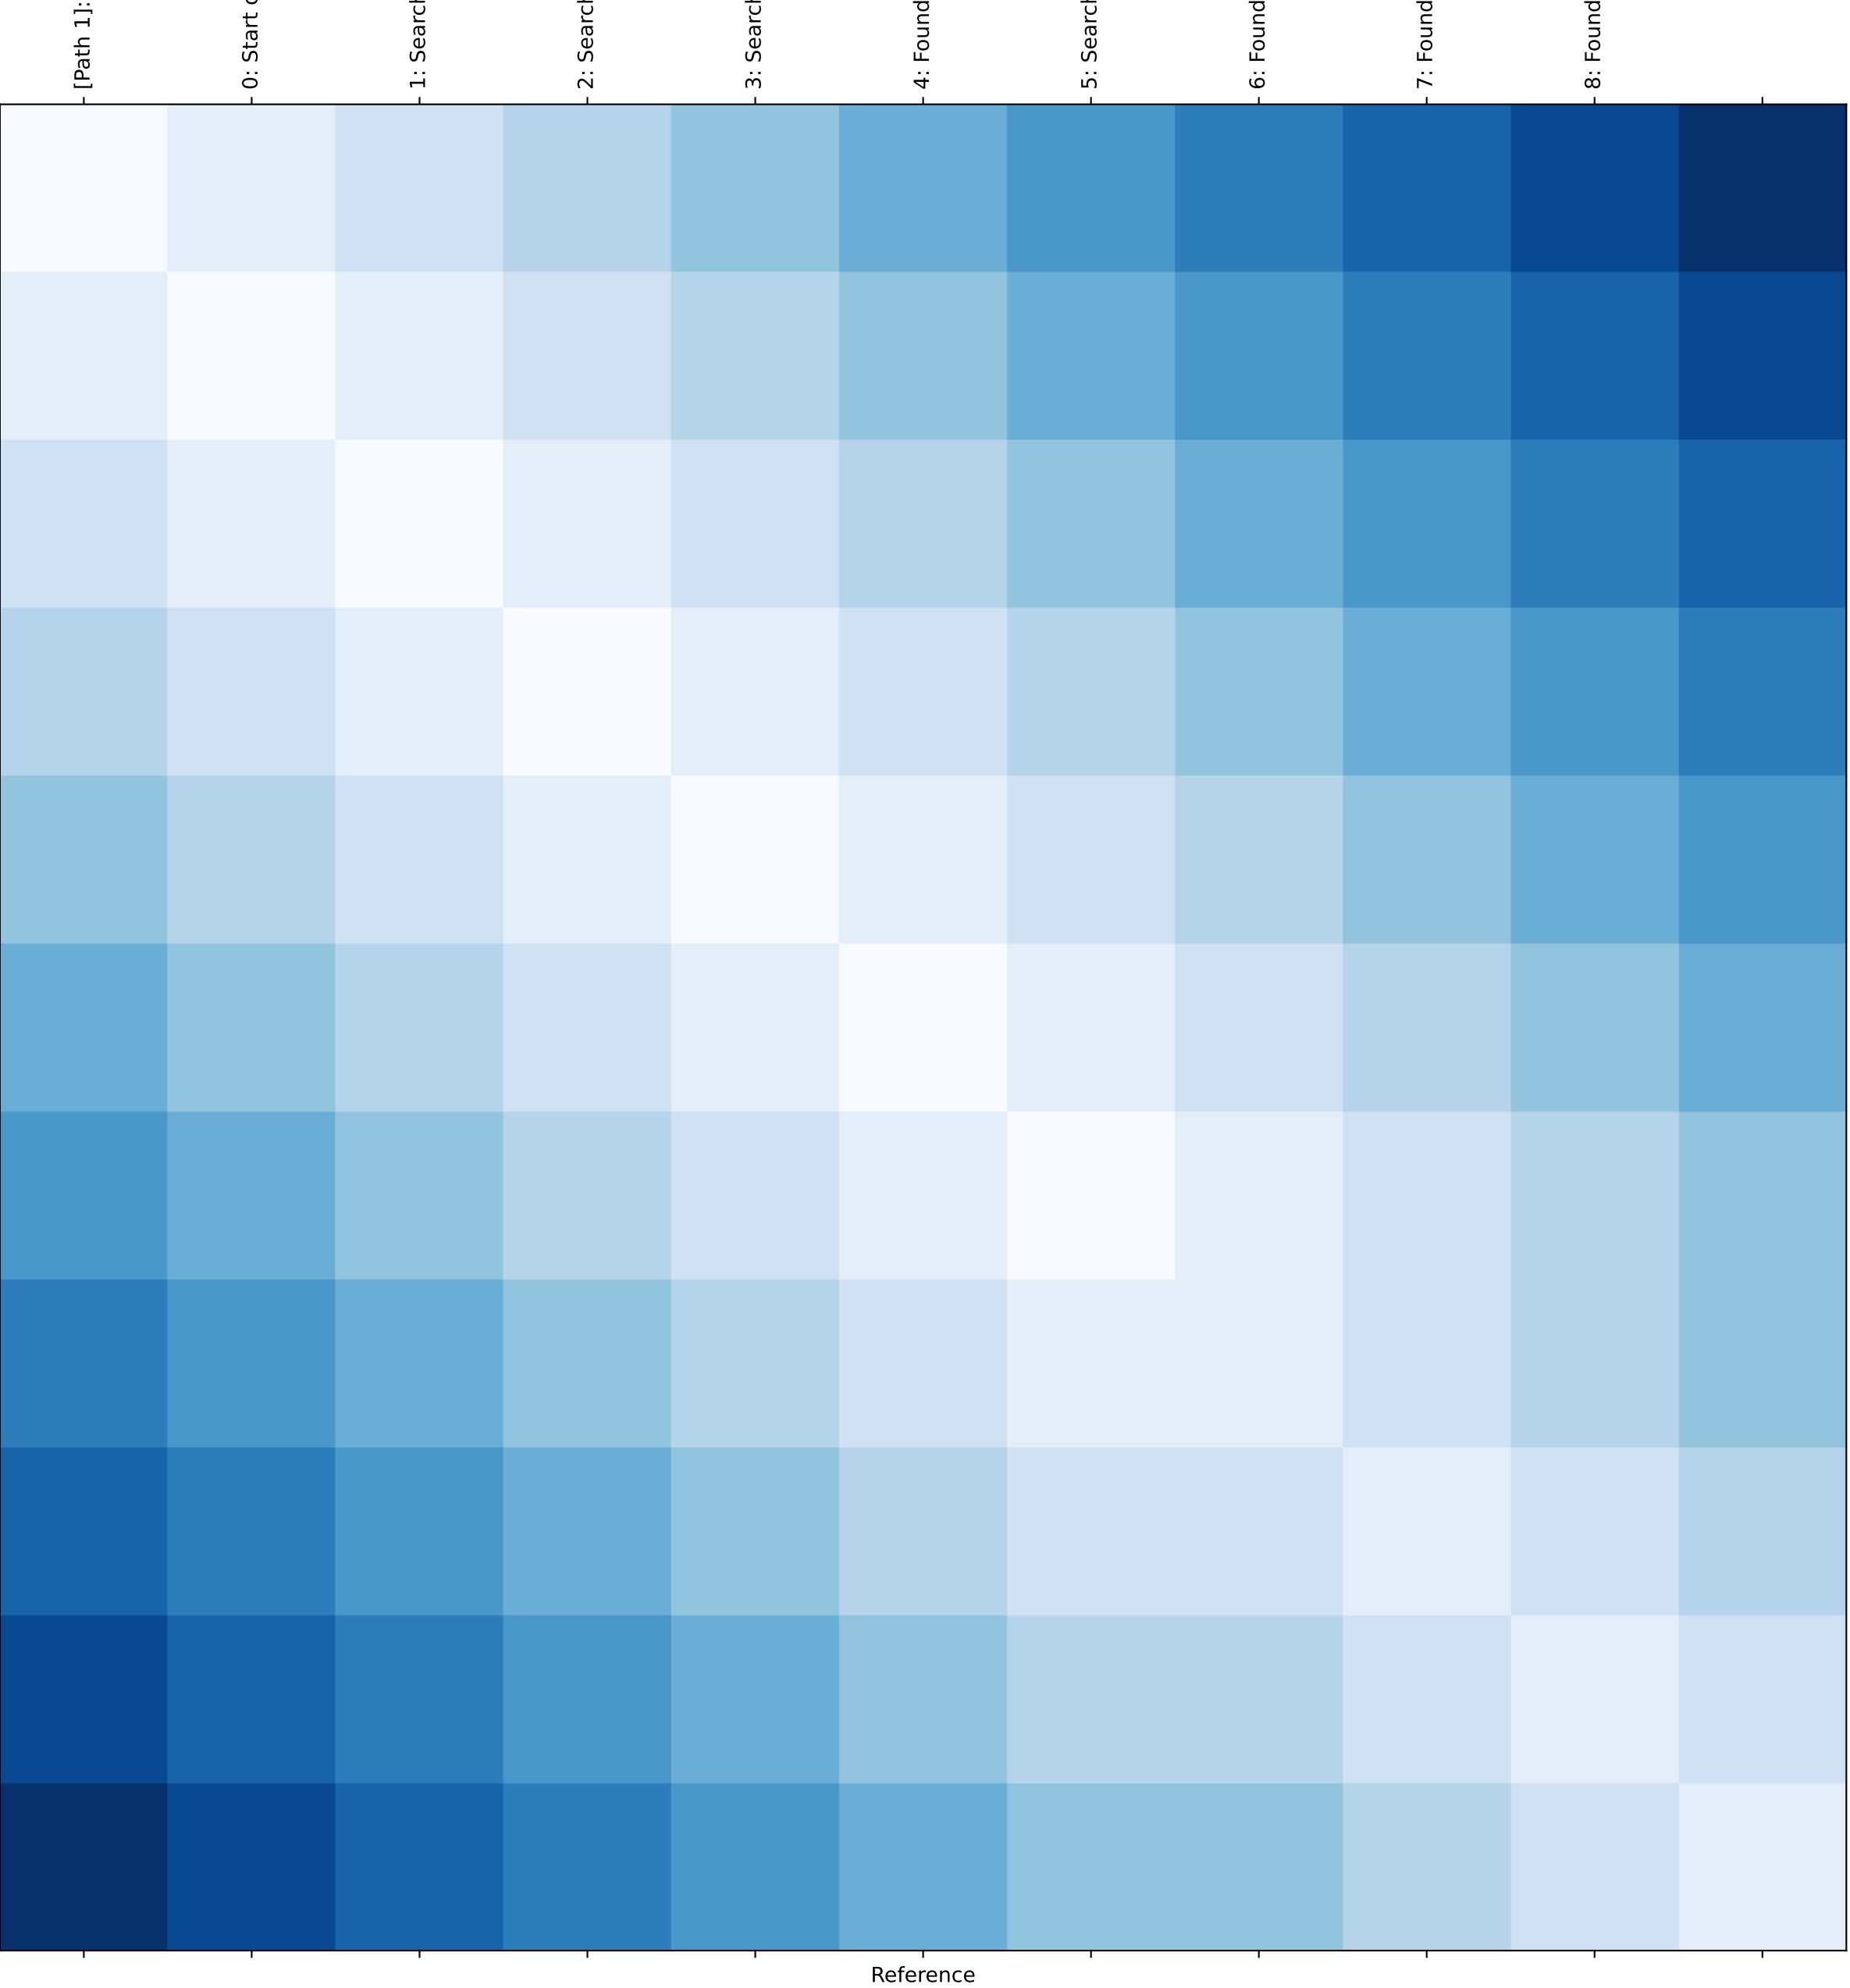

Reference
