# Supplementary material
Source: ML conference proceedings conference paper supplement (https://openreview.net/forum?id=awtd0XhzKQ)
Supplement: supplementary_material [file attachment]

Hypothesis

8: Found: query(51) | {'Result': 'SoldPastries = 51'}

7: Found: pastries\_sold(15, 48, 12, 51)

6: Found: 51 is 63-12

5: Searching: \_5830 is 63-12

4: Found: 63 is 15+48

3: Searching: \_14520 is 15+48

2: Searching: pastries\_sold(15, 48, 12, Candidate Variable\_0)

1: Searching: query(Candidate Variable\_0)

0: Start of execution: Beginning Search

[Path 1]:

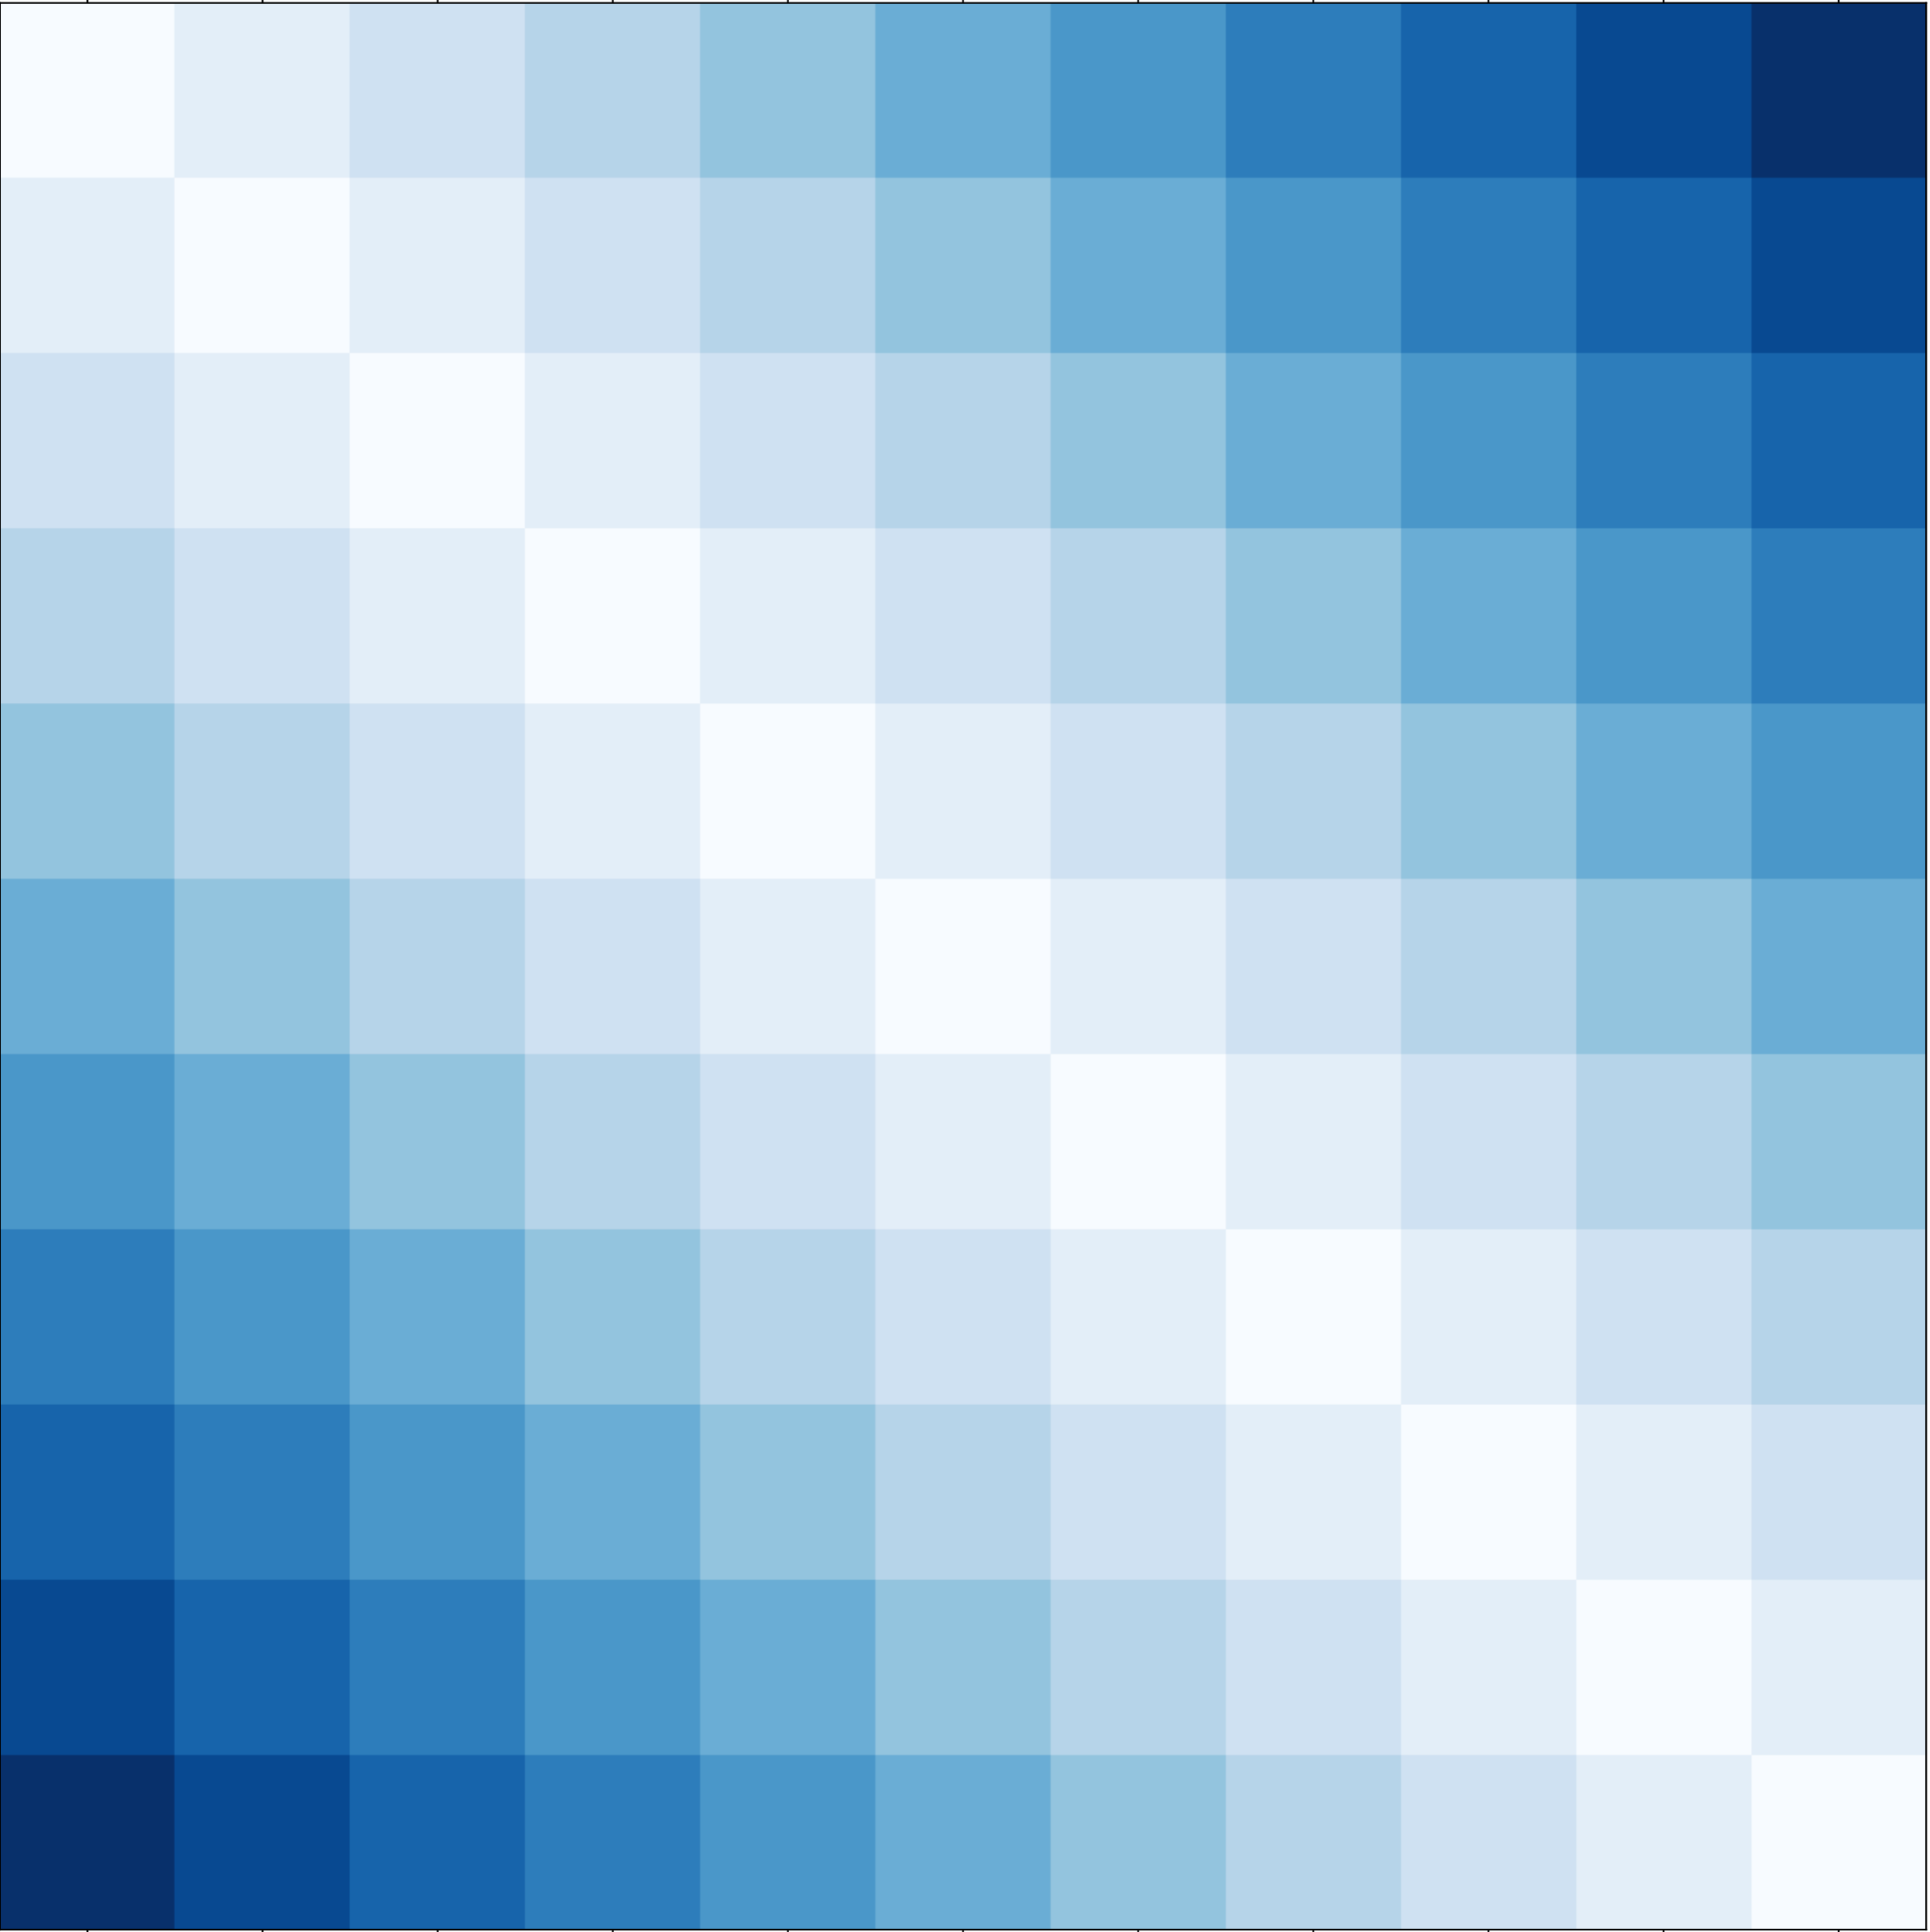

Reference
