# Supplementary material (part 4 of 8)
Source: ML conference proceedings conference paper supplement (https://openreview.net/forum?id=awtd0XhzKQ)

Hypothesis

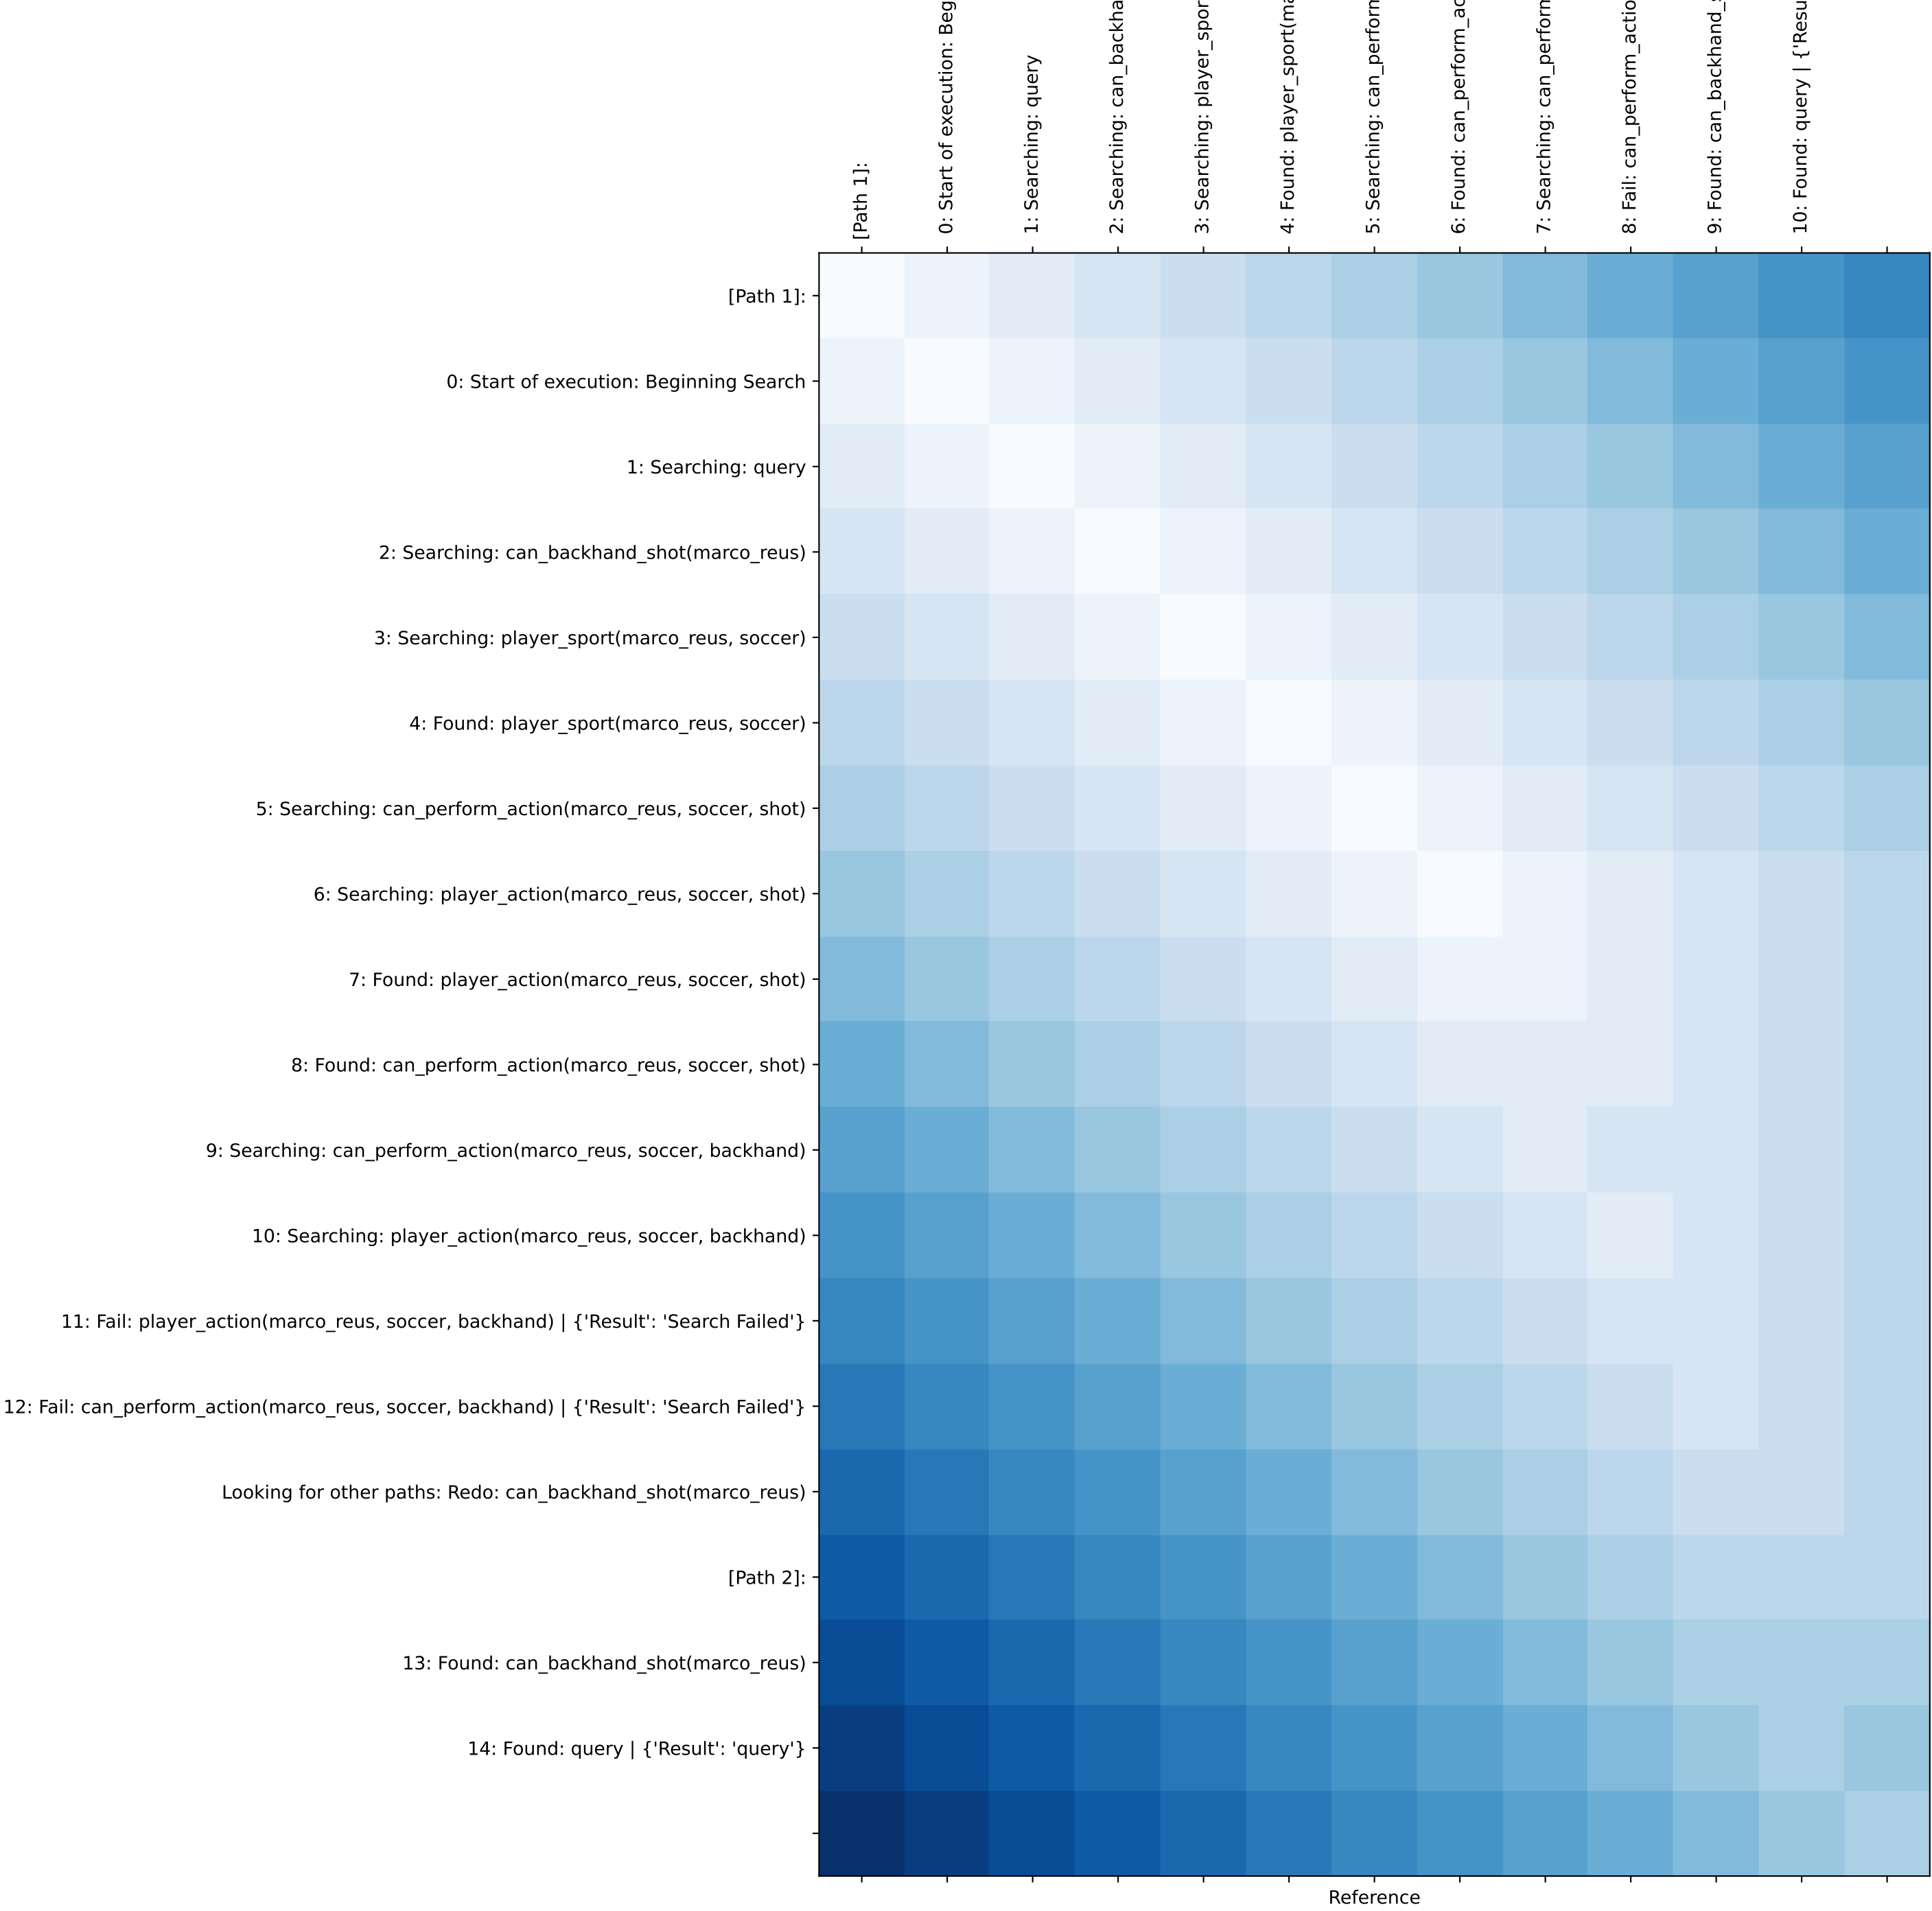

Reference

Supplement: supplementary_material [file attachment]

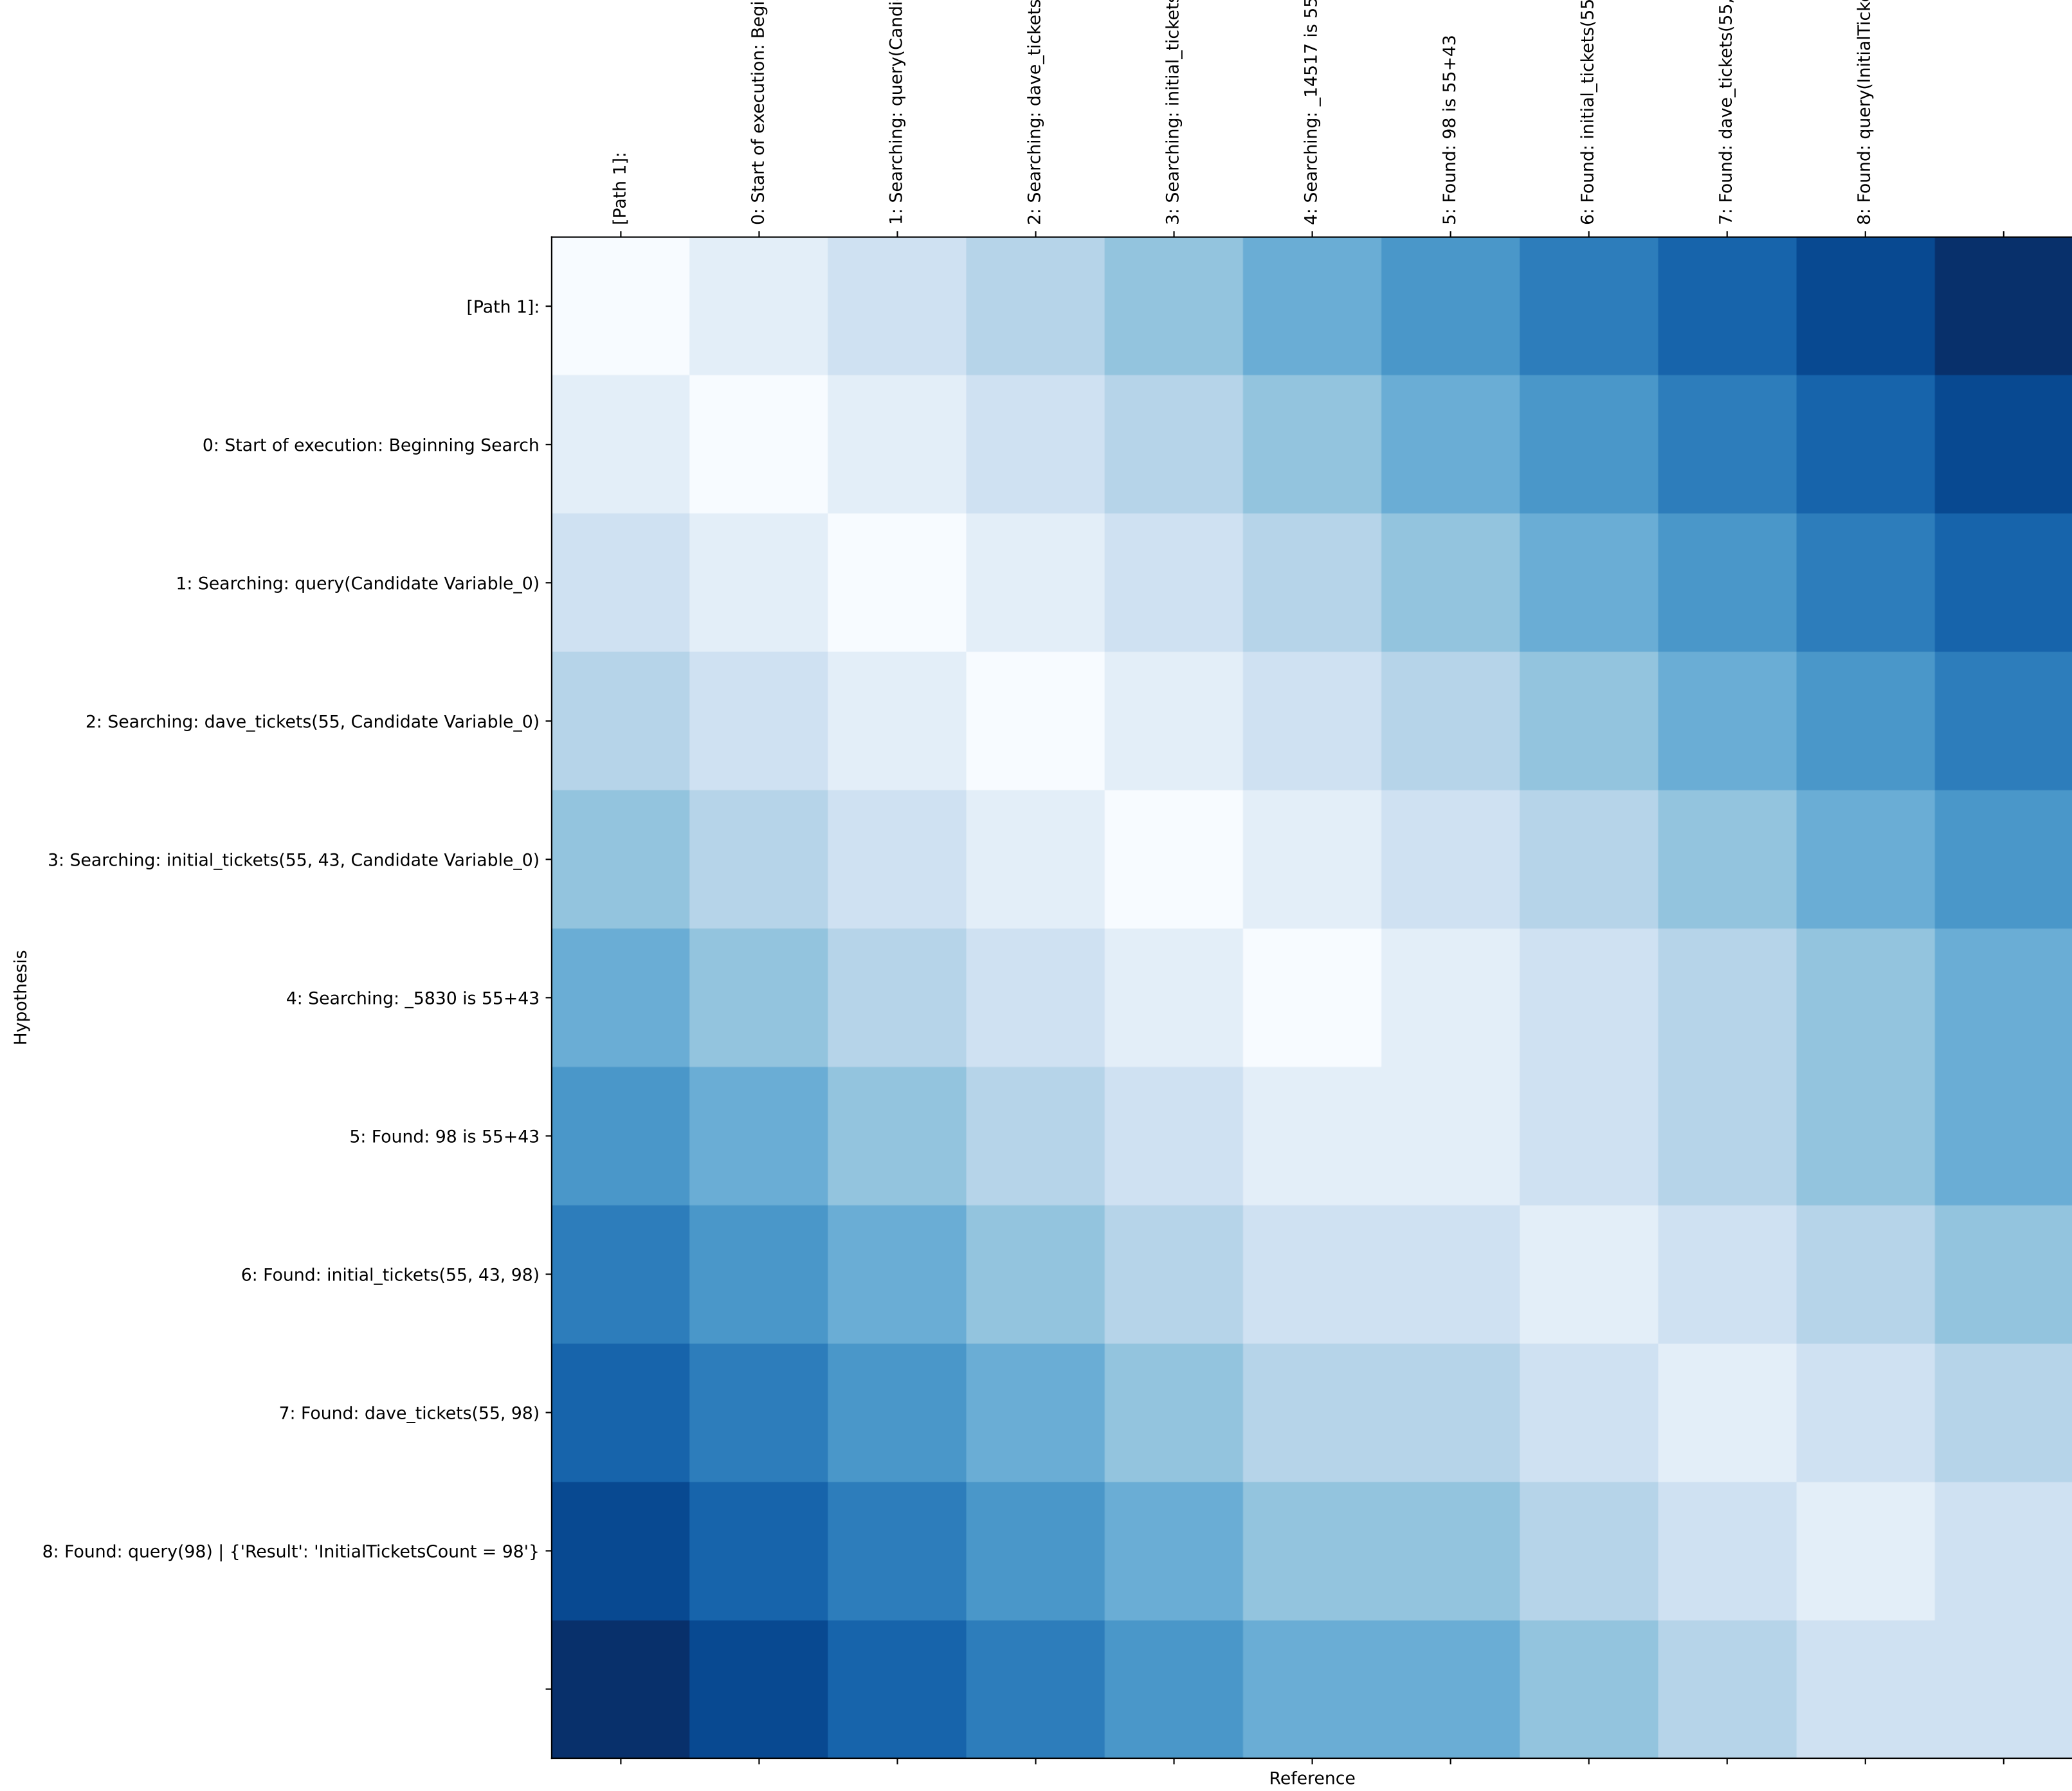

Supplement: supplementary_material [file attachment]

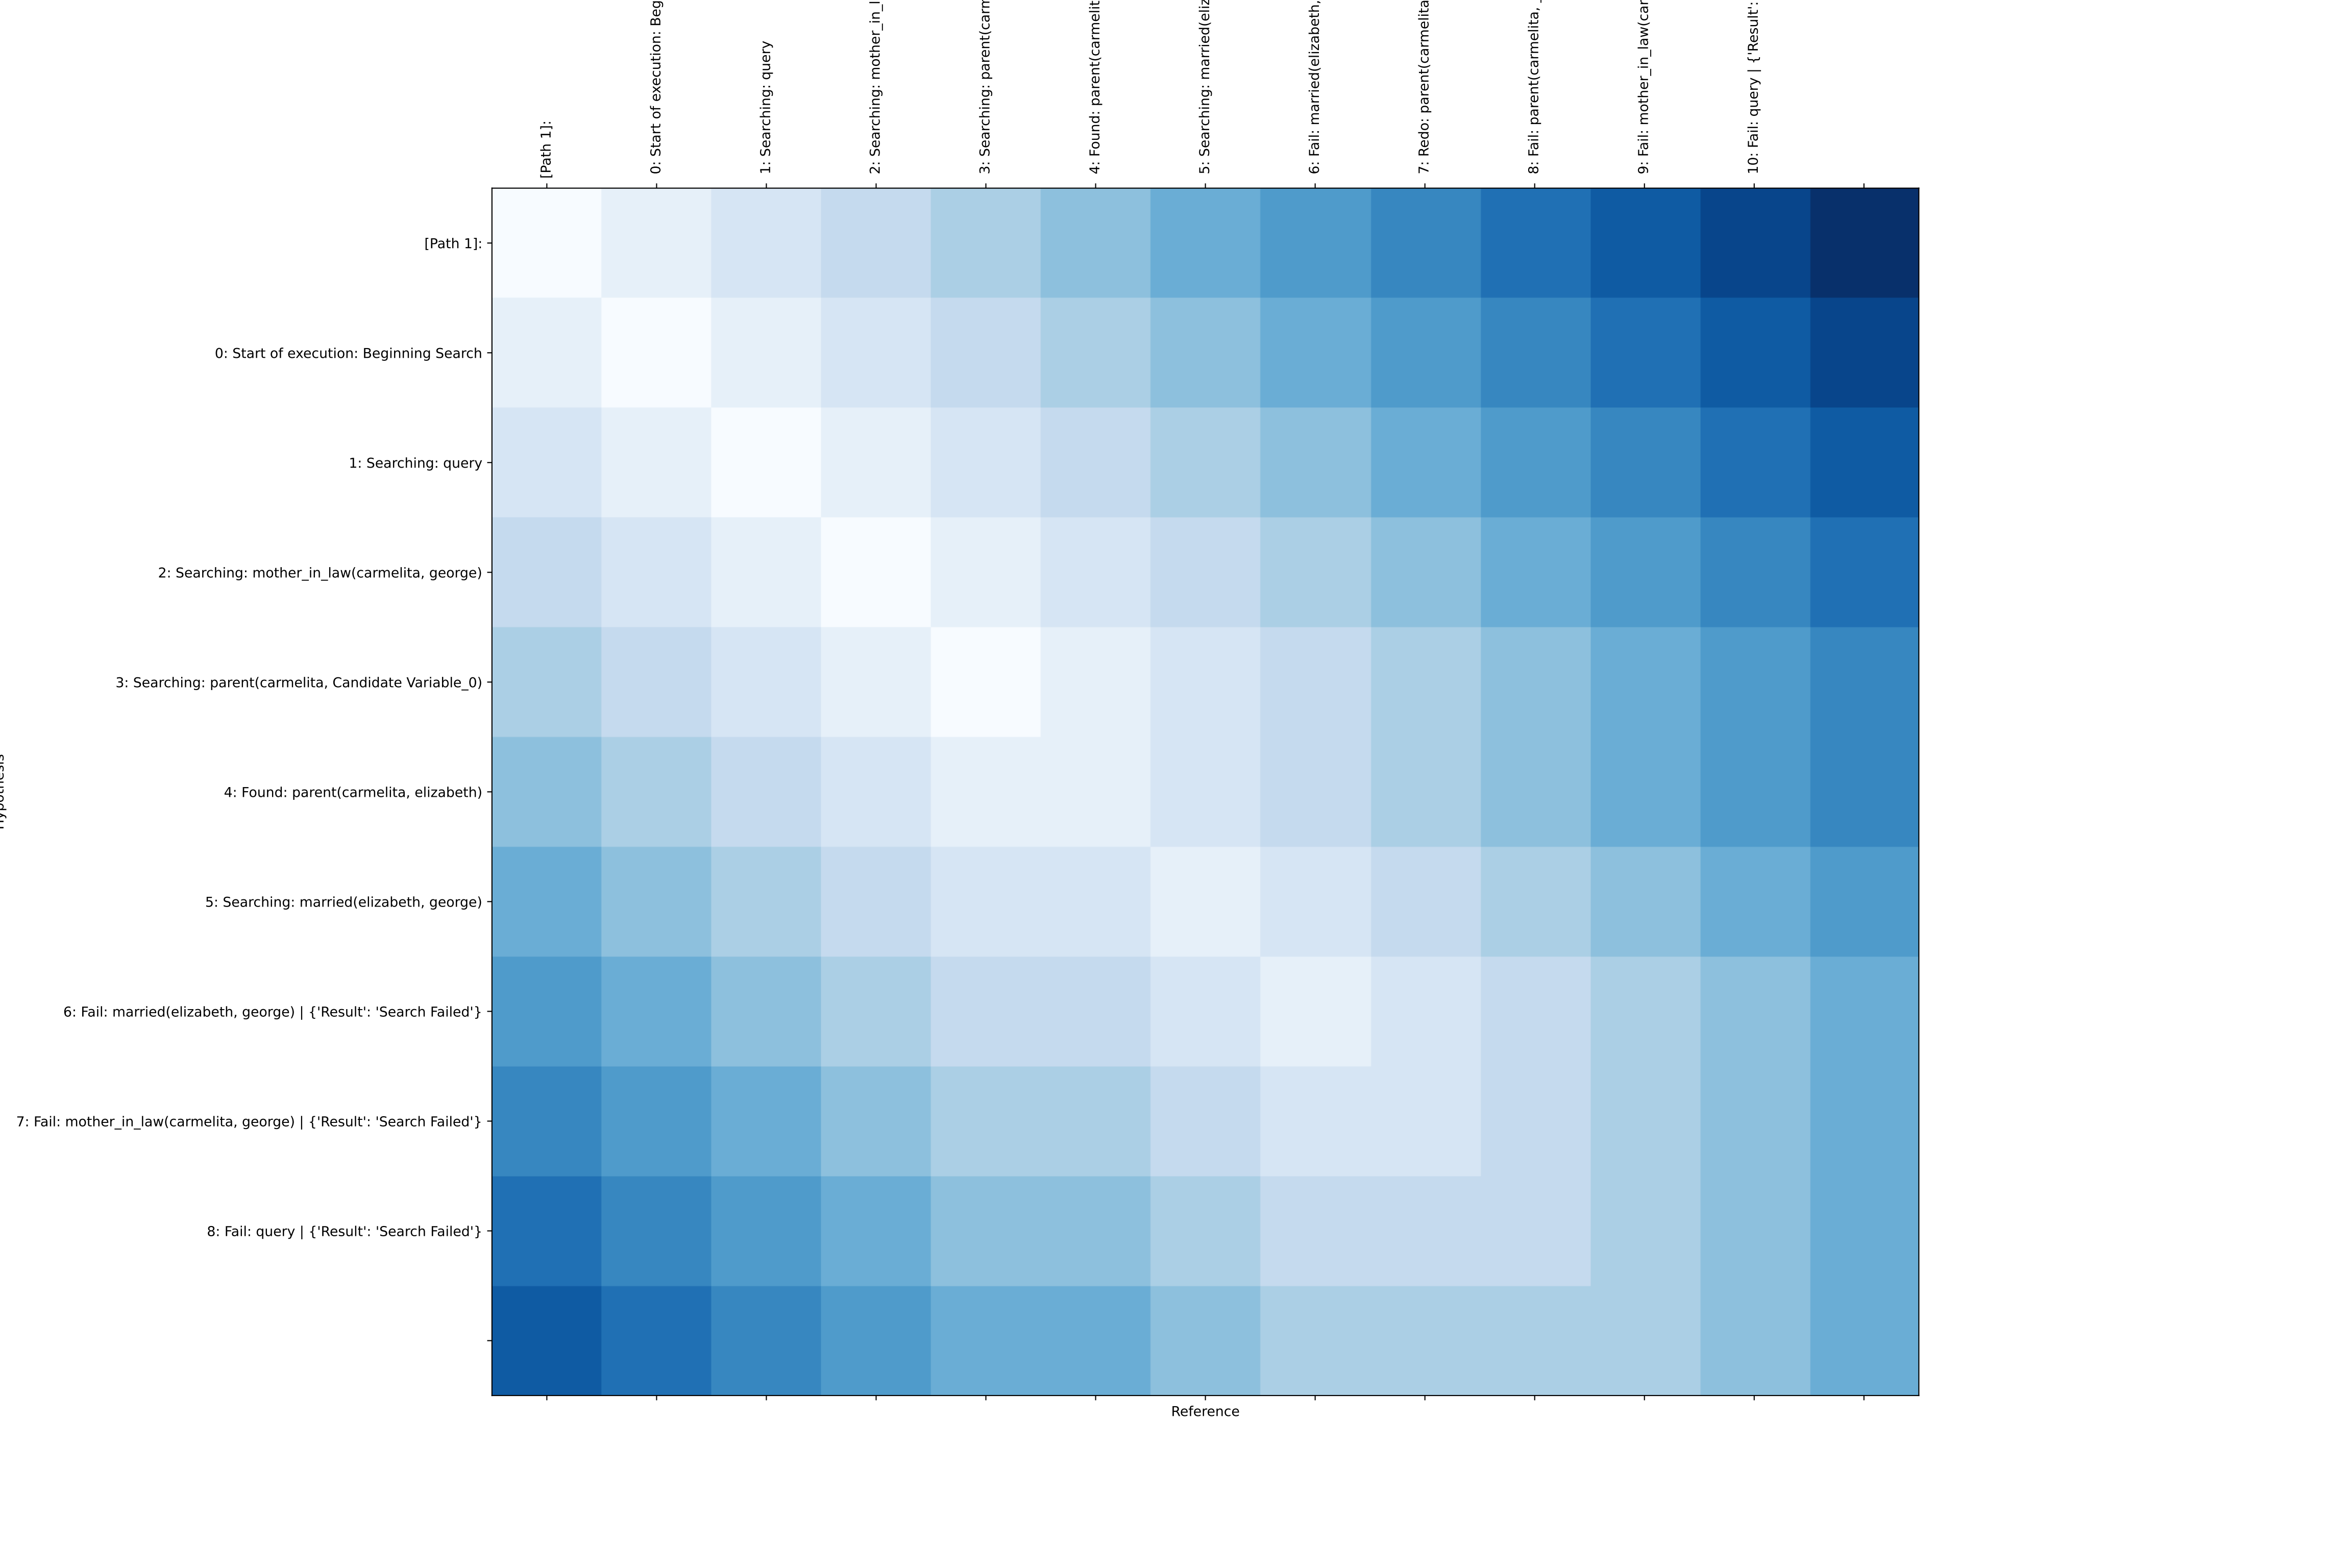

Supplement: supplementary_material [file attachment]

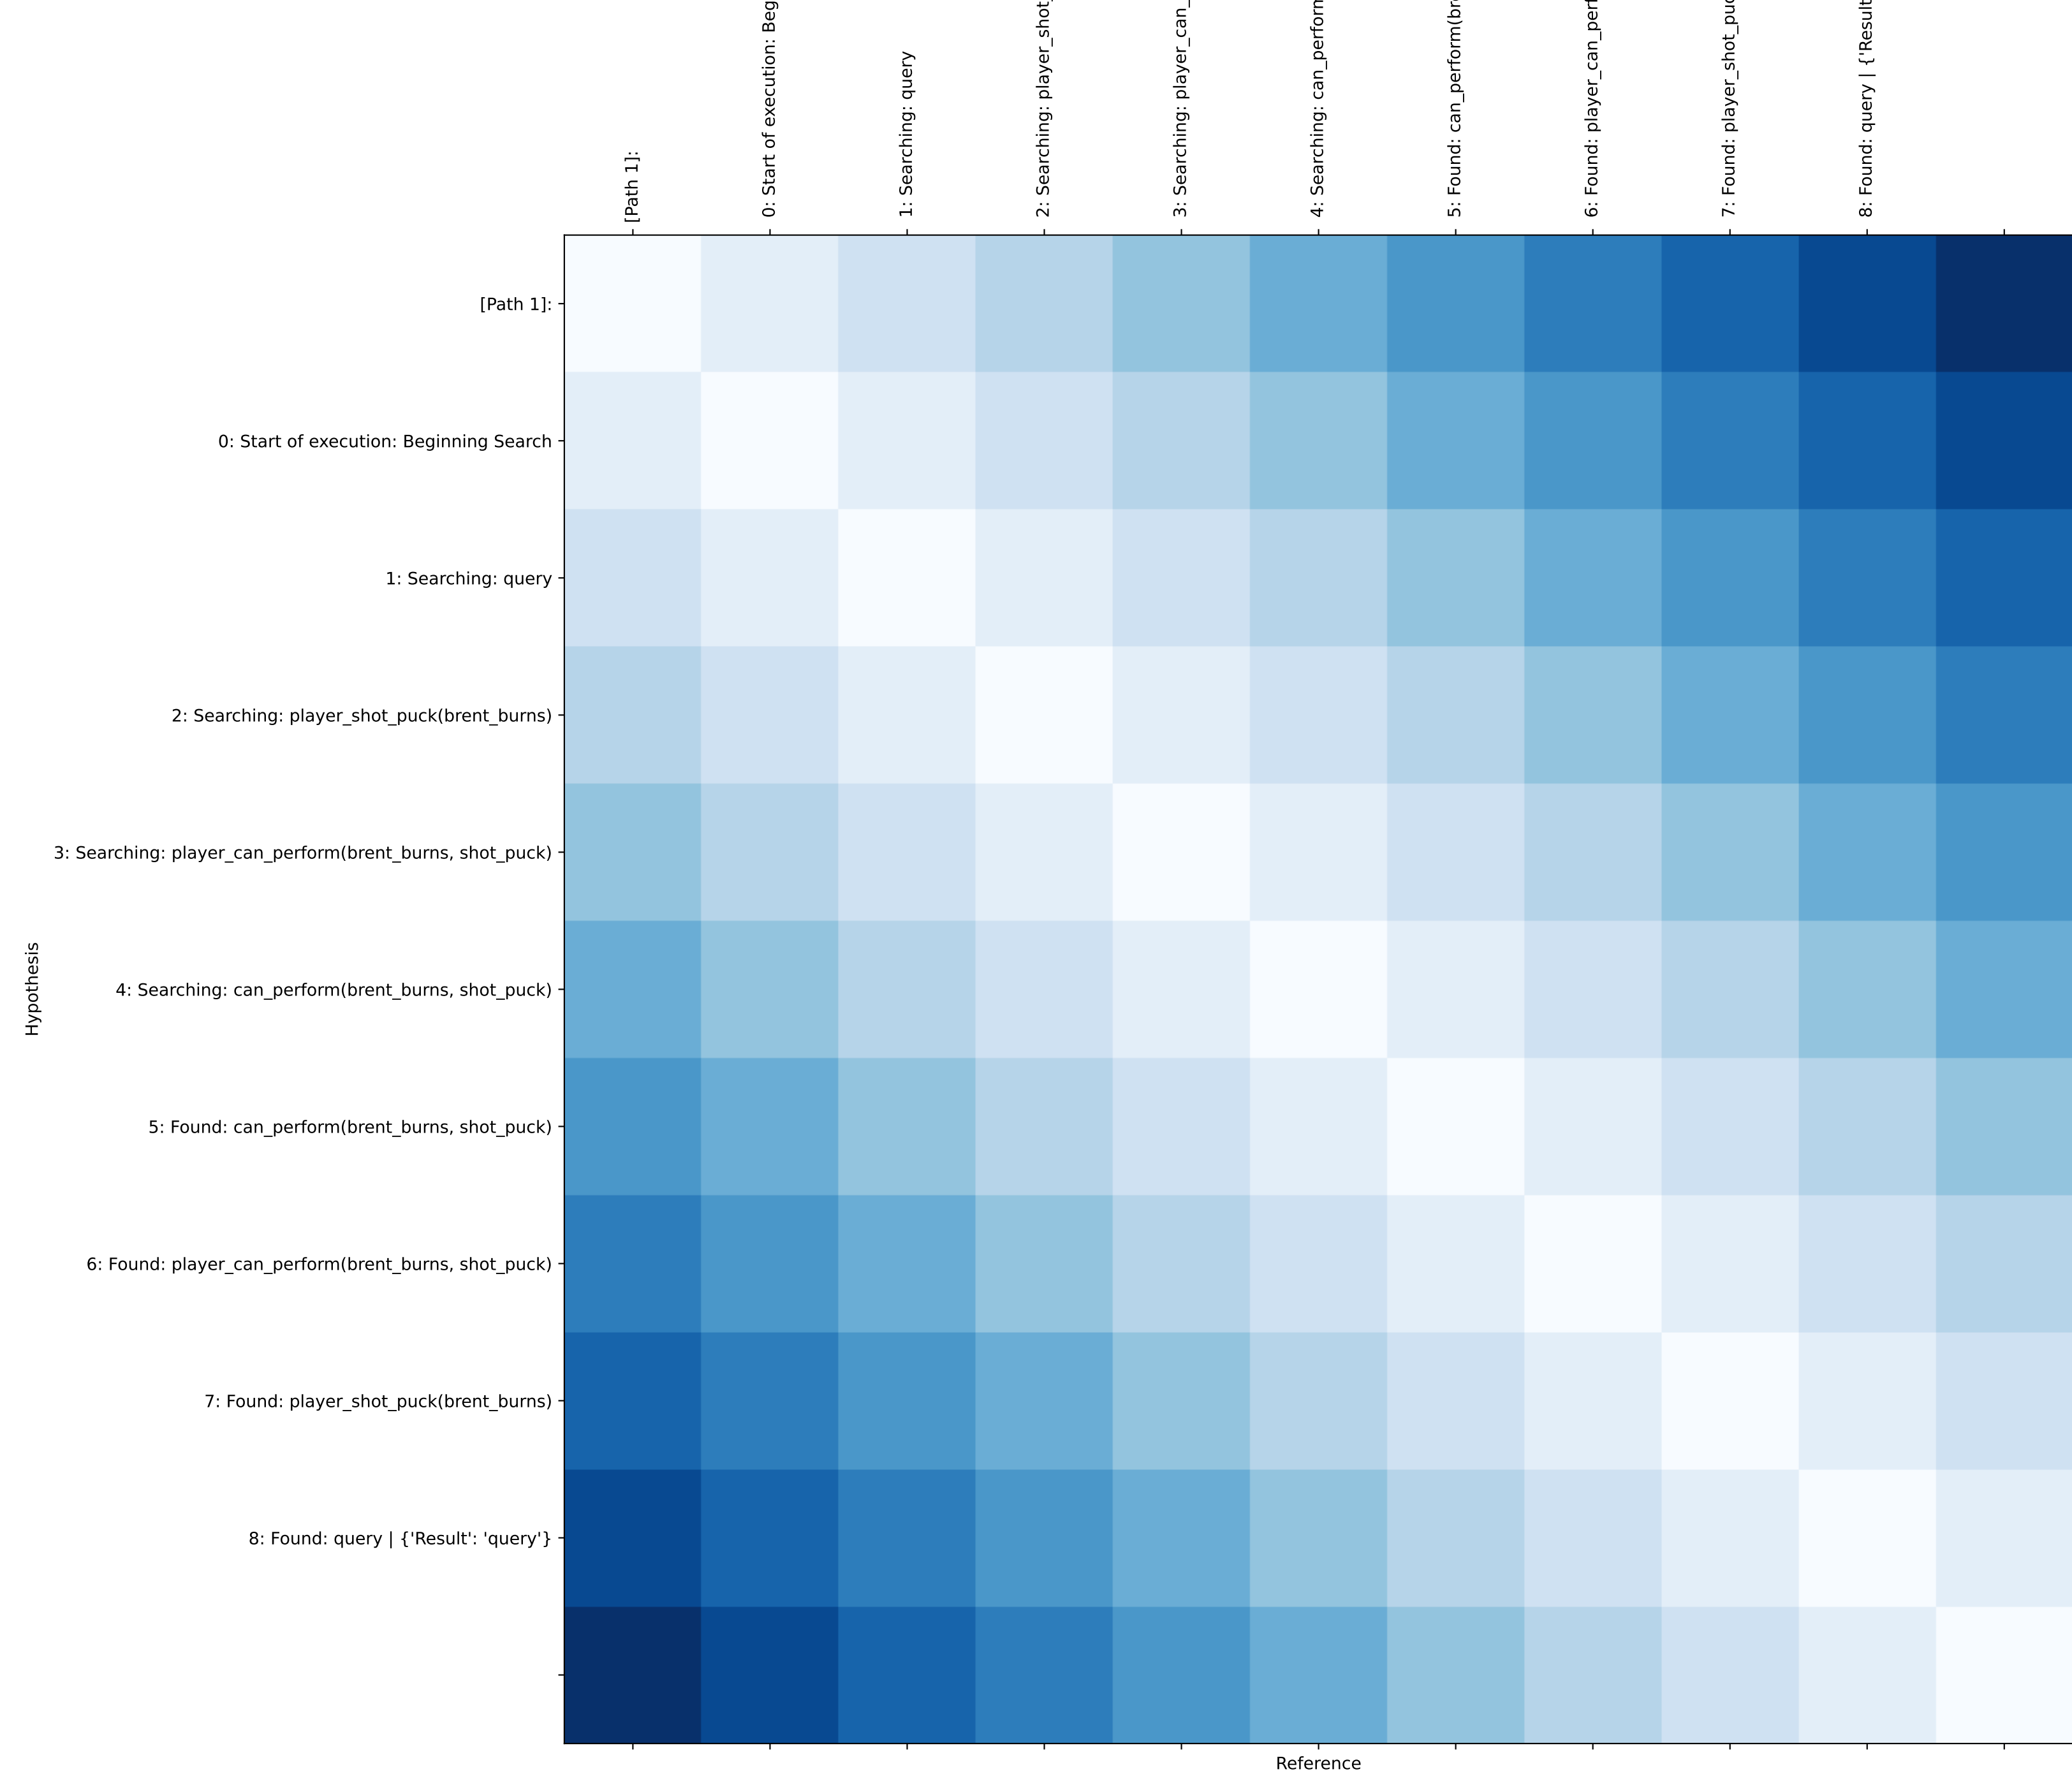

Supplement: supplementary_material [file attachment]

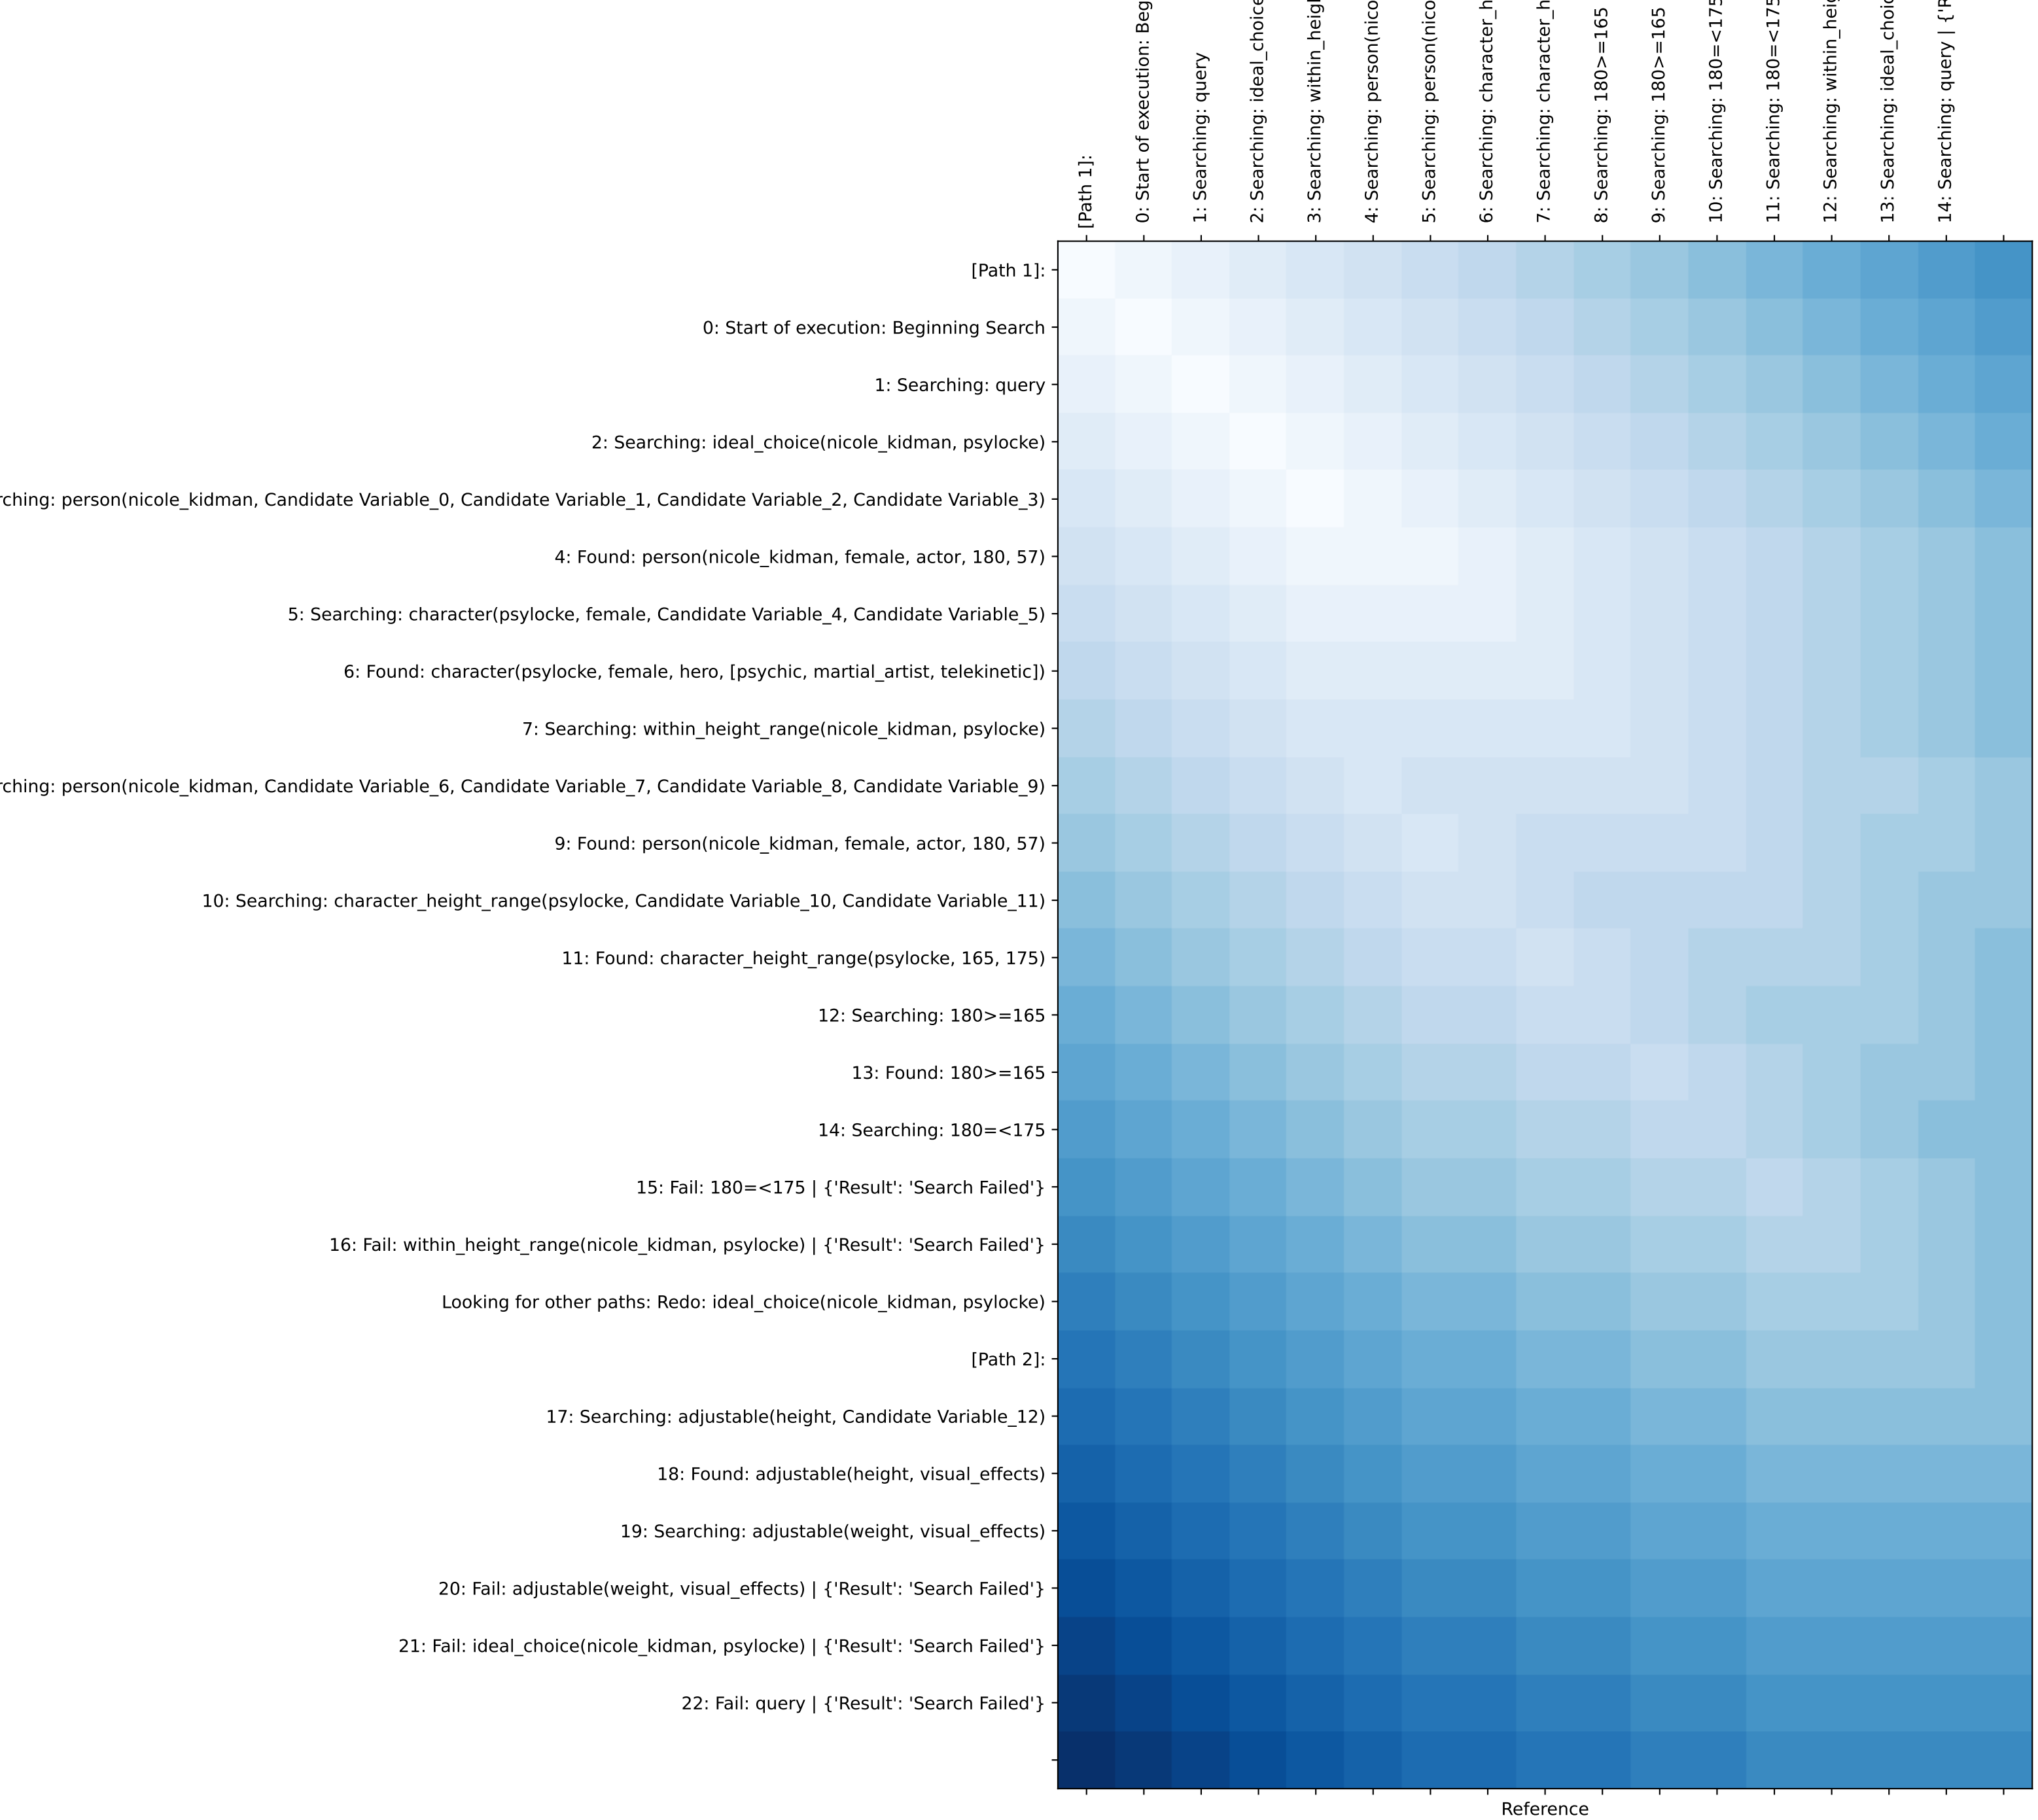

Supplement: supplementary_material [file attachment]

Hypothesis

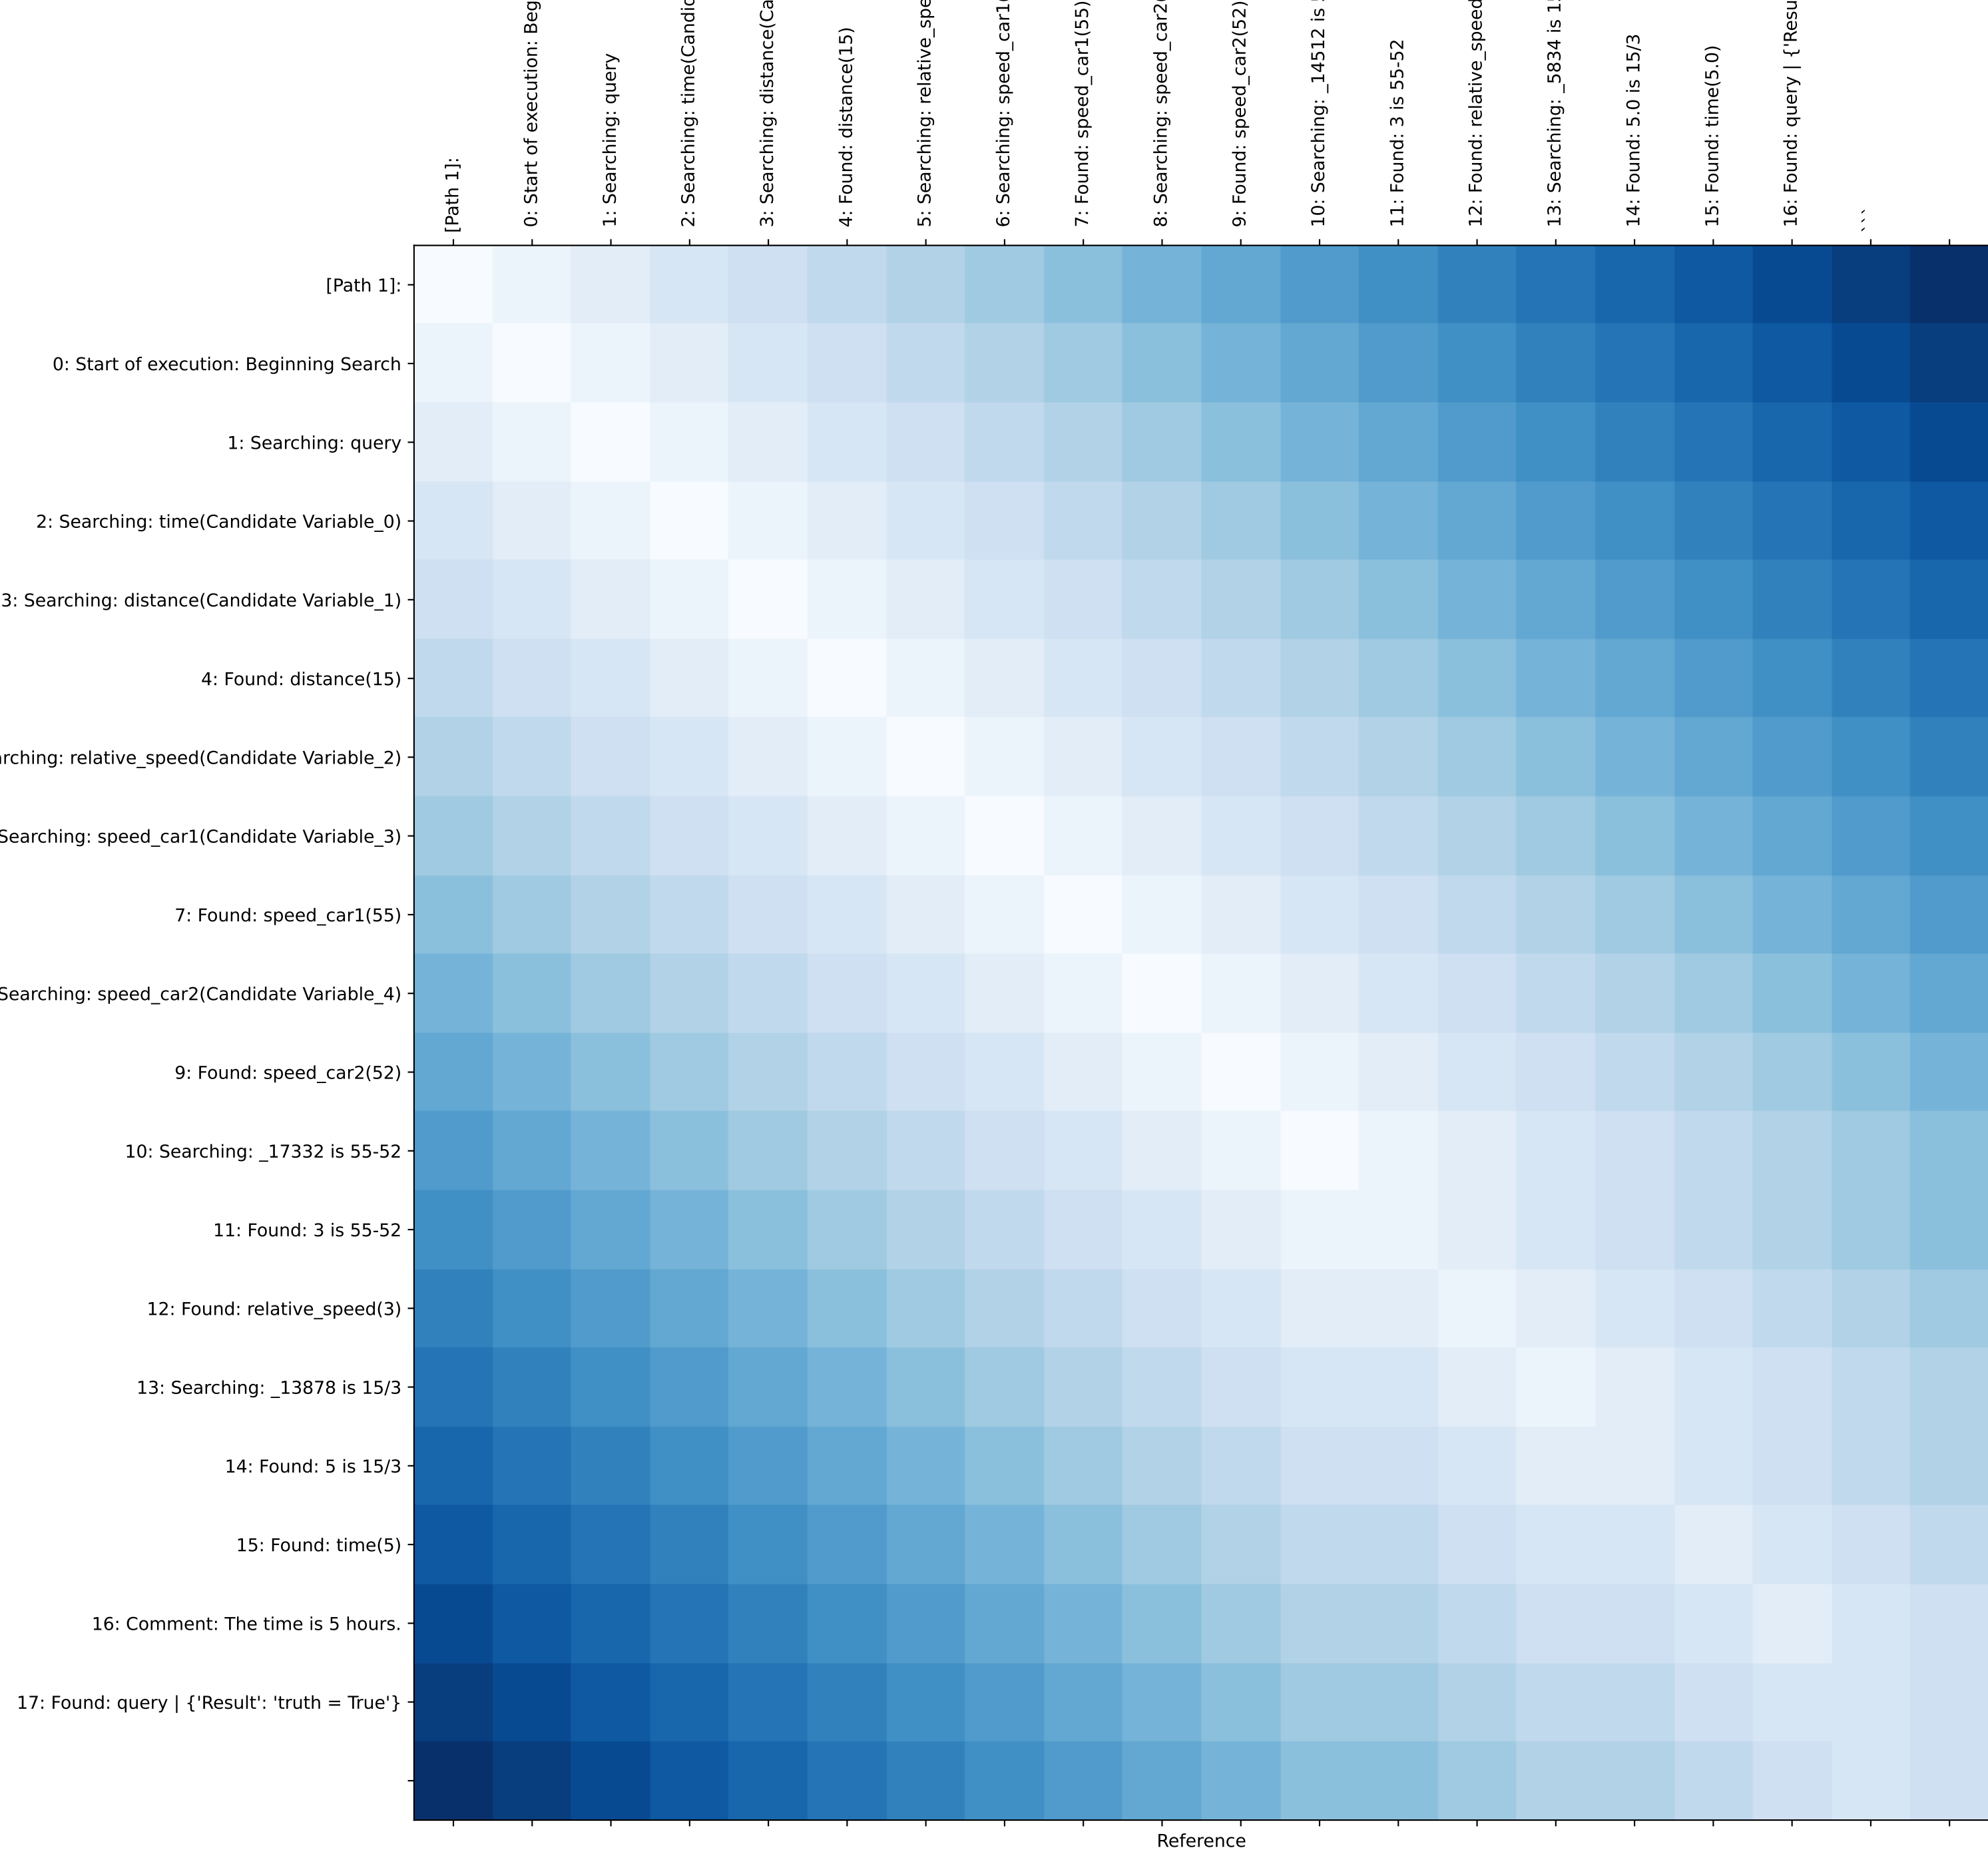

Reference

Supplement: supplementary_material [file attachment]

Hypothesis

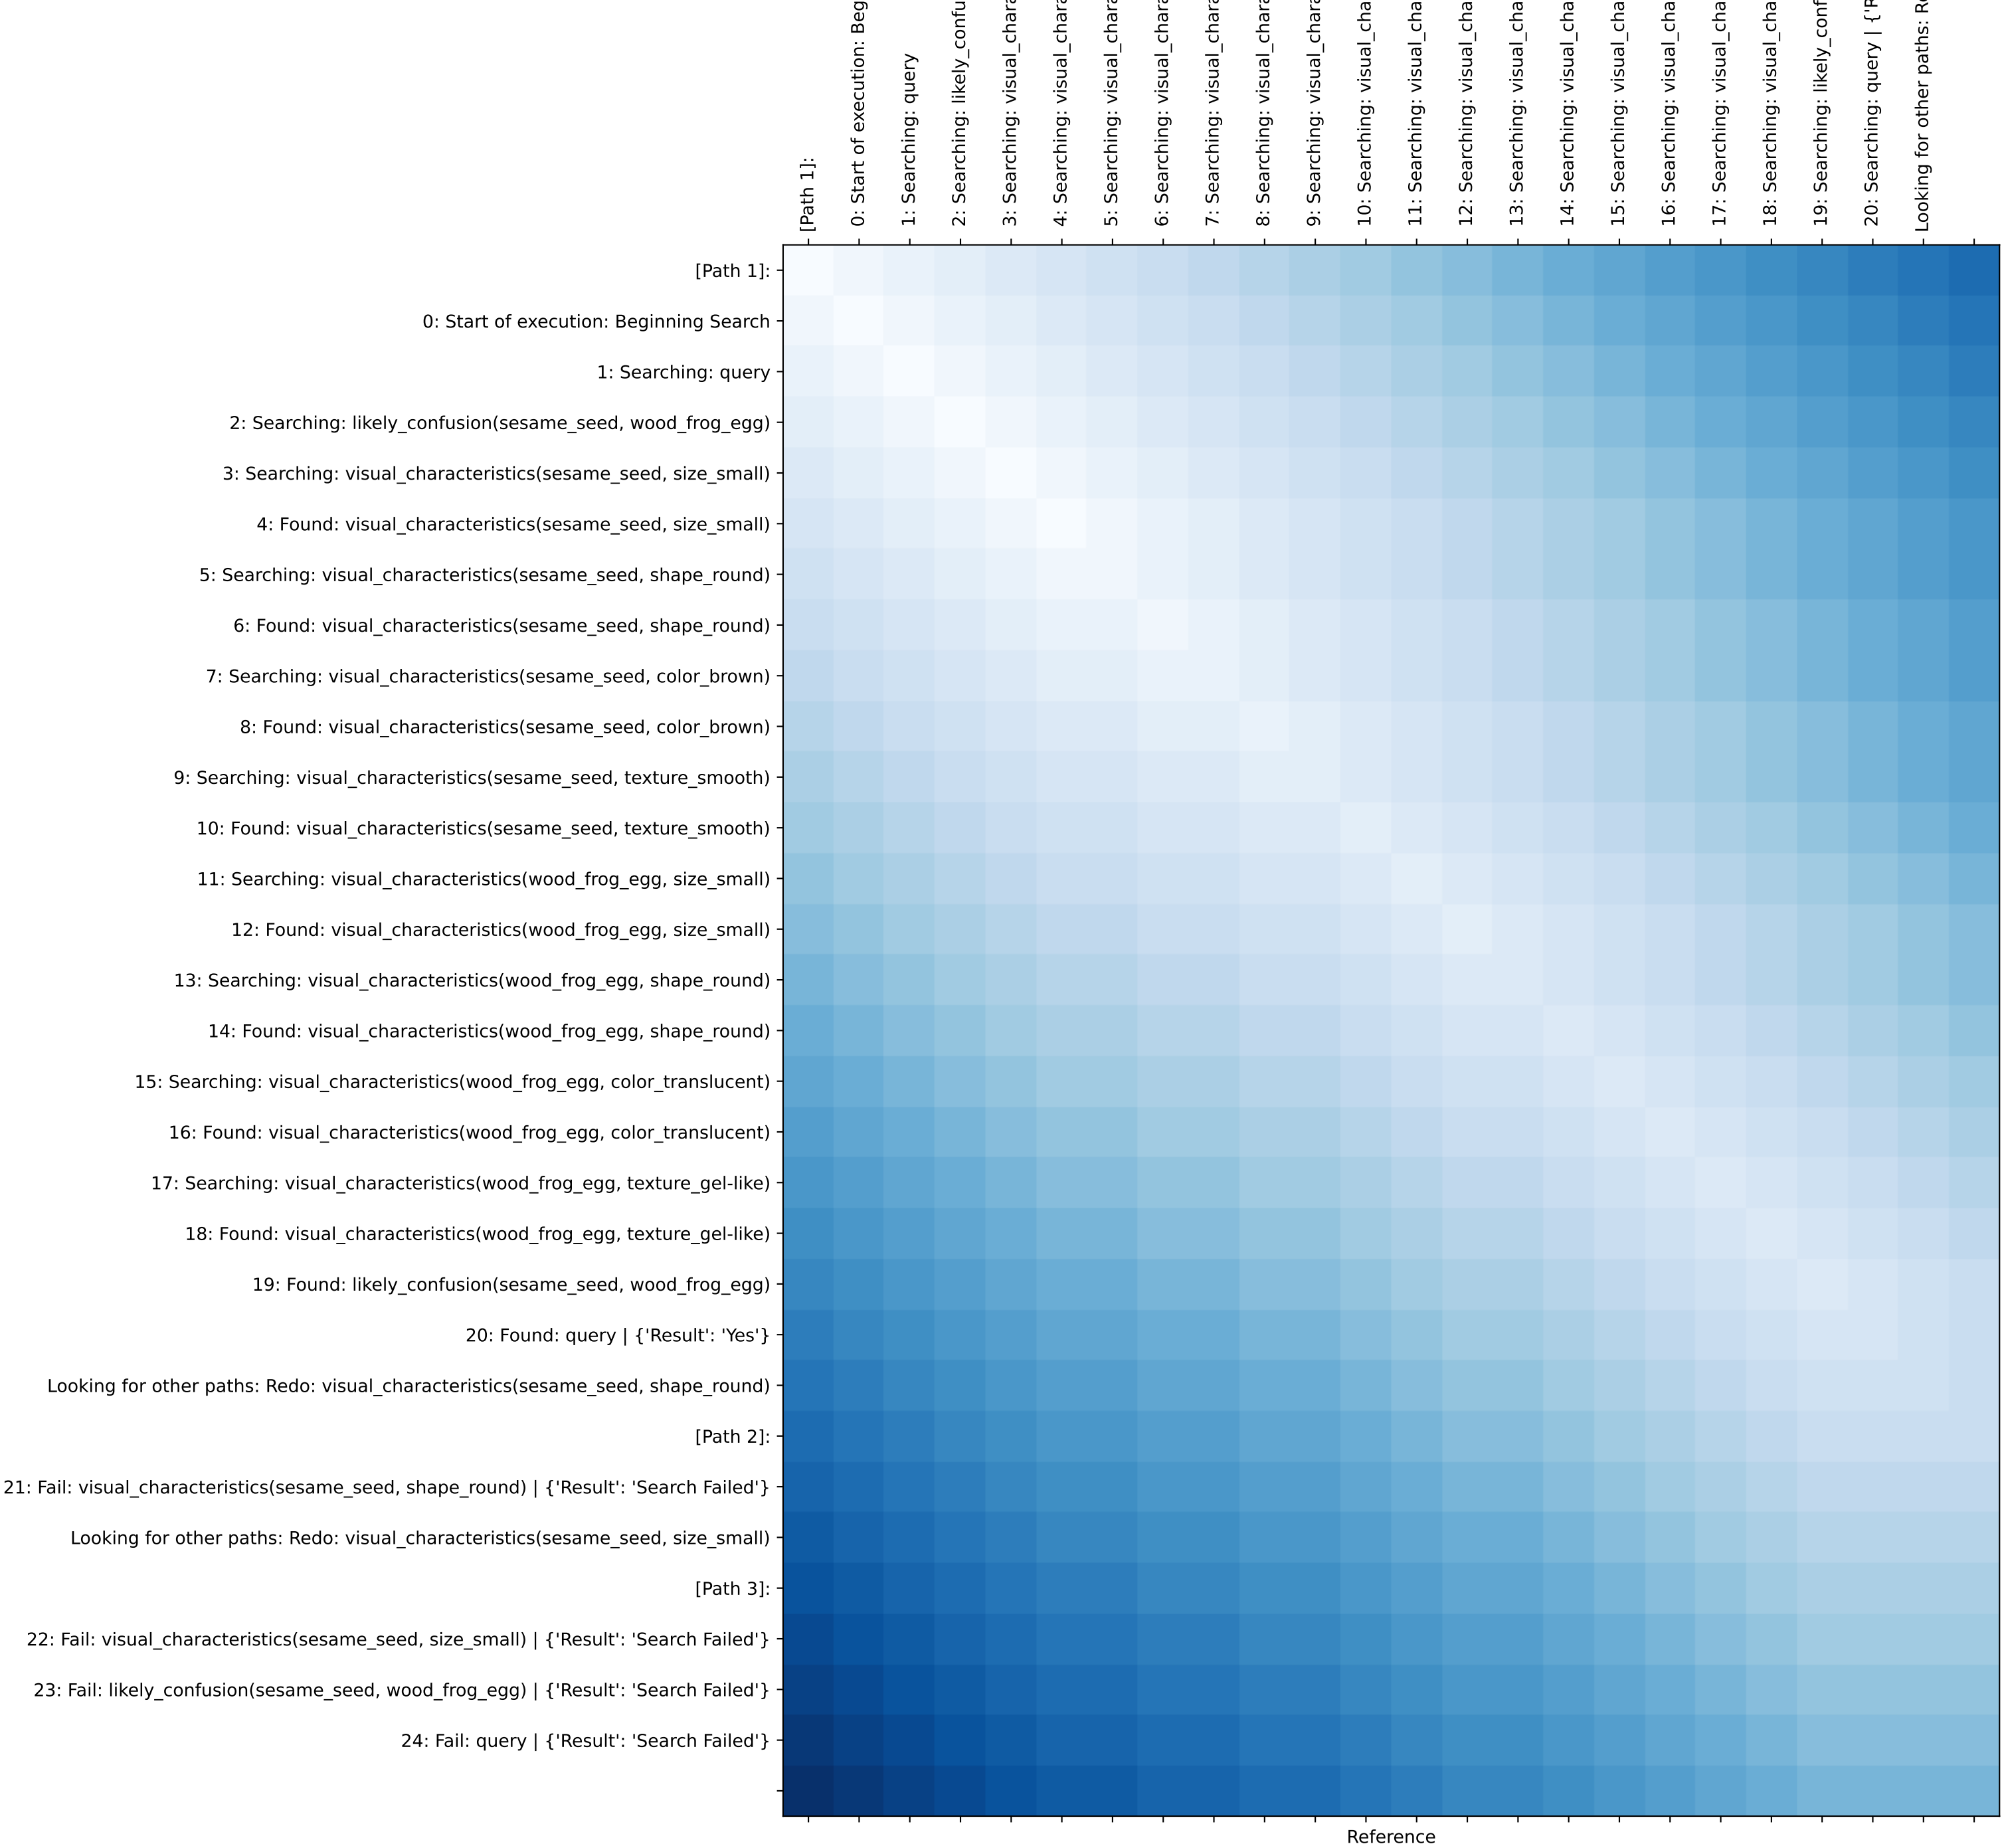

Supplement: supplementary_material [file attachment]

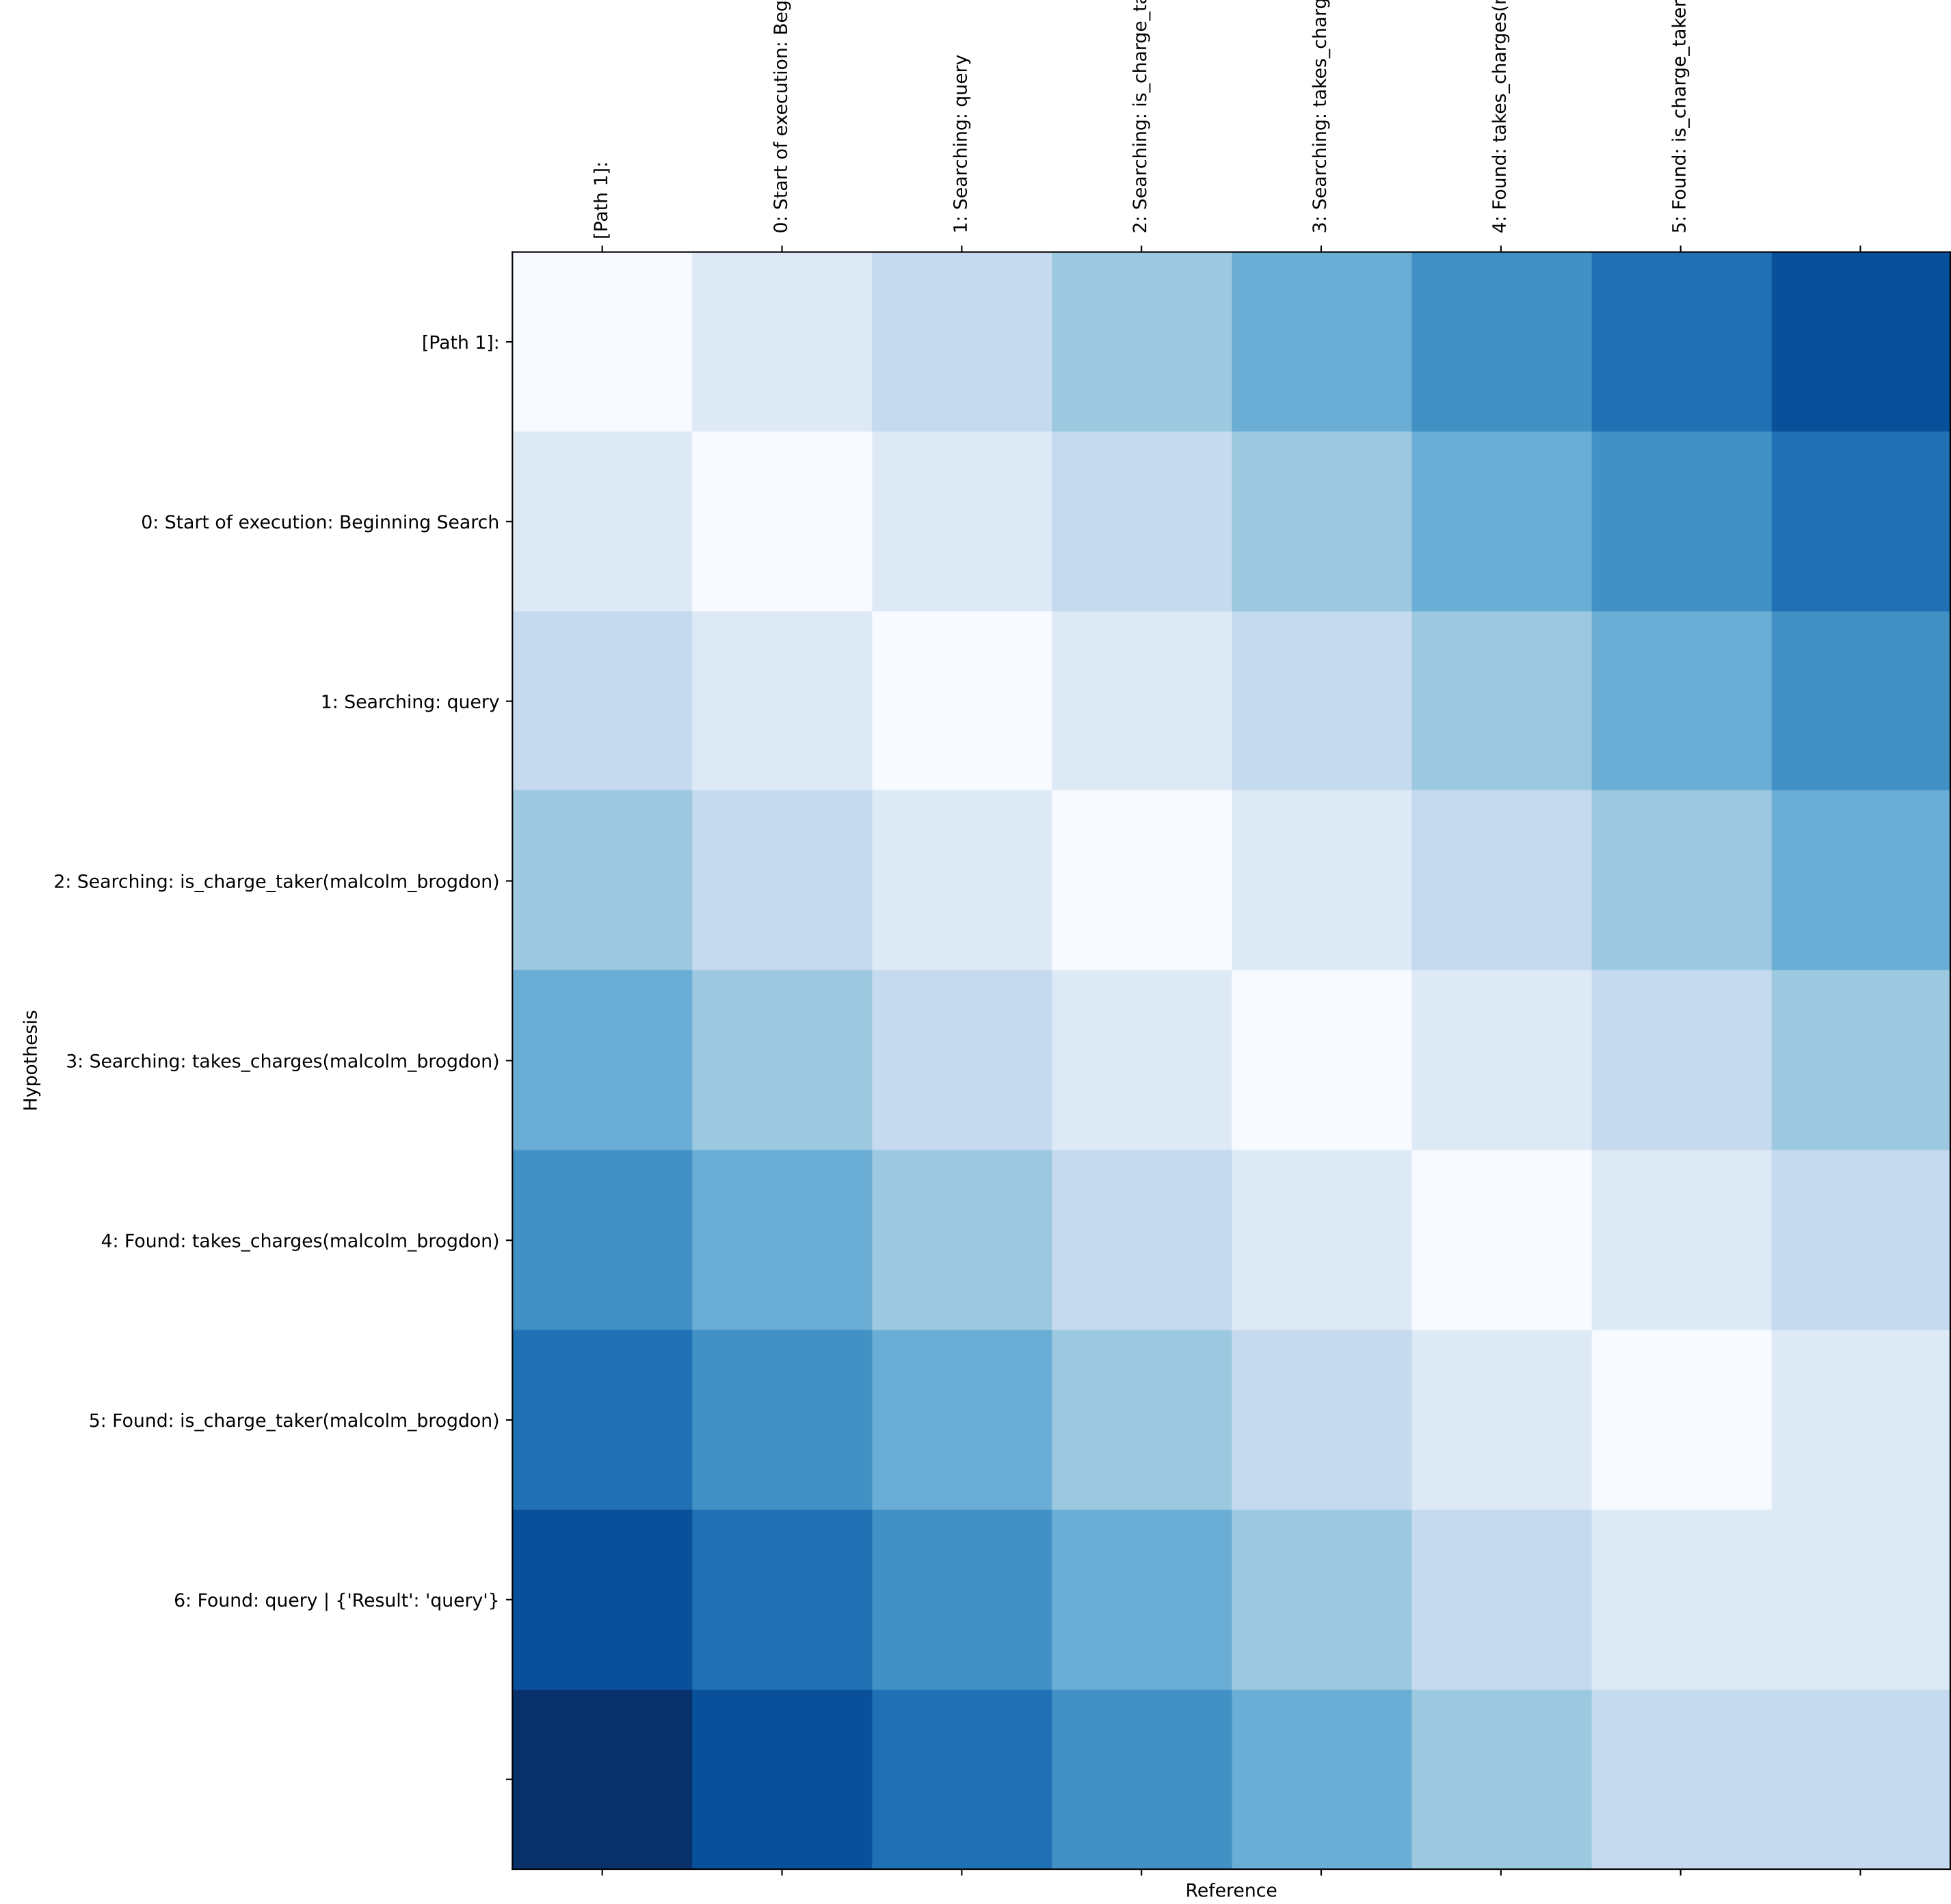

Supplement: supplementary_material [file attachment]

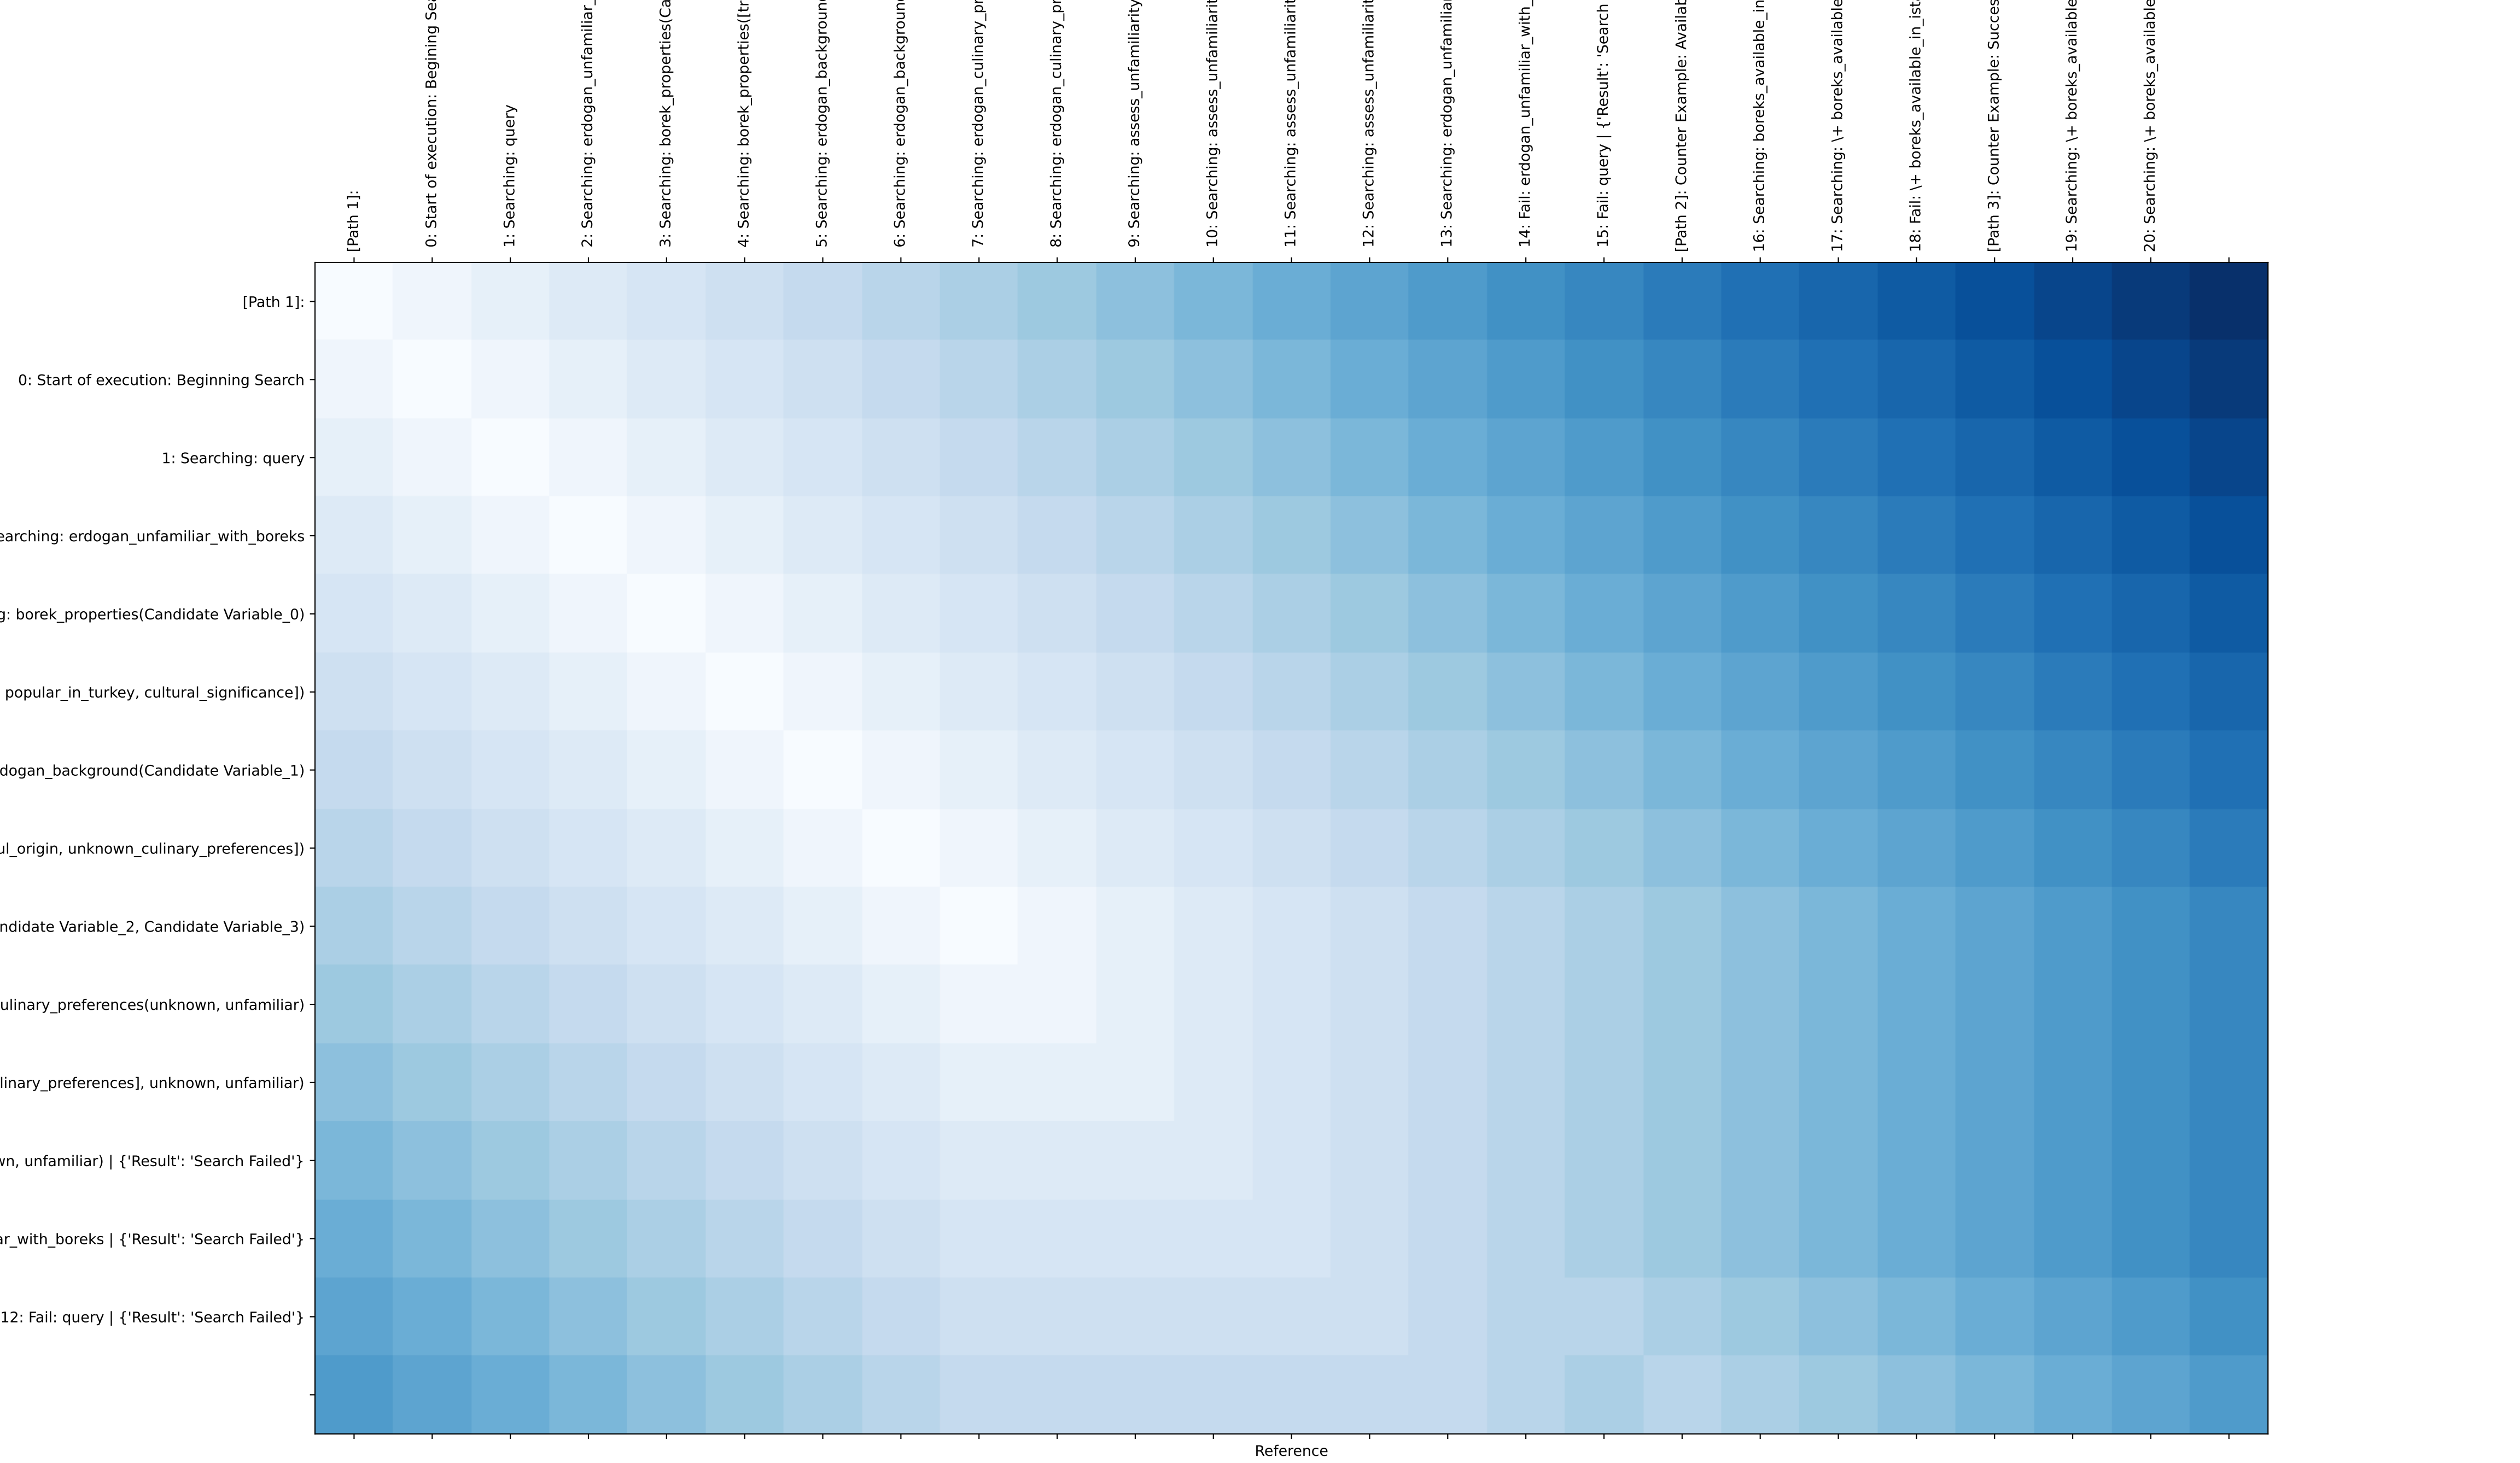

Supplement: supplementary_material [file attachment]

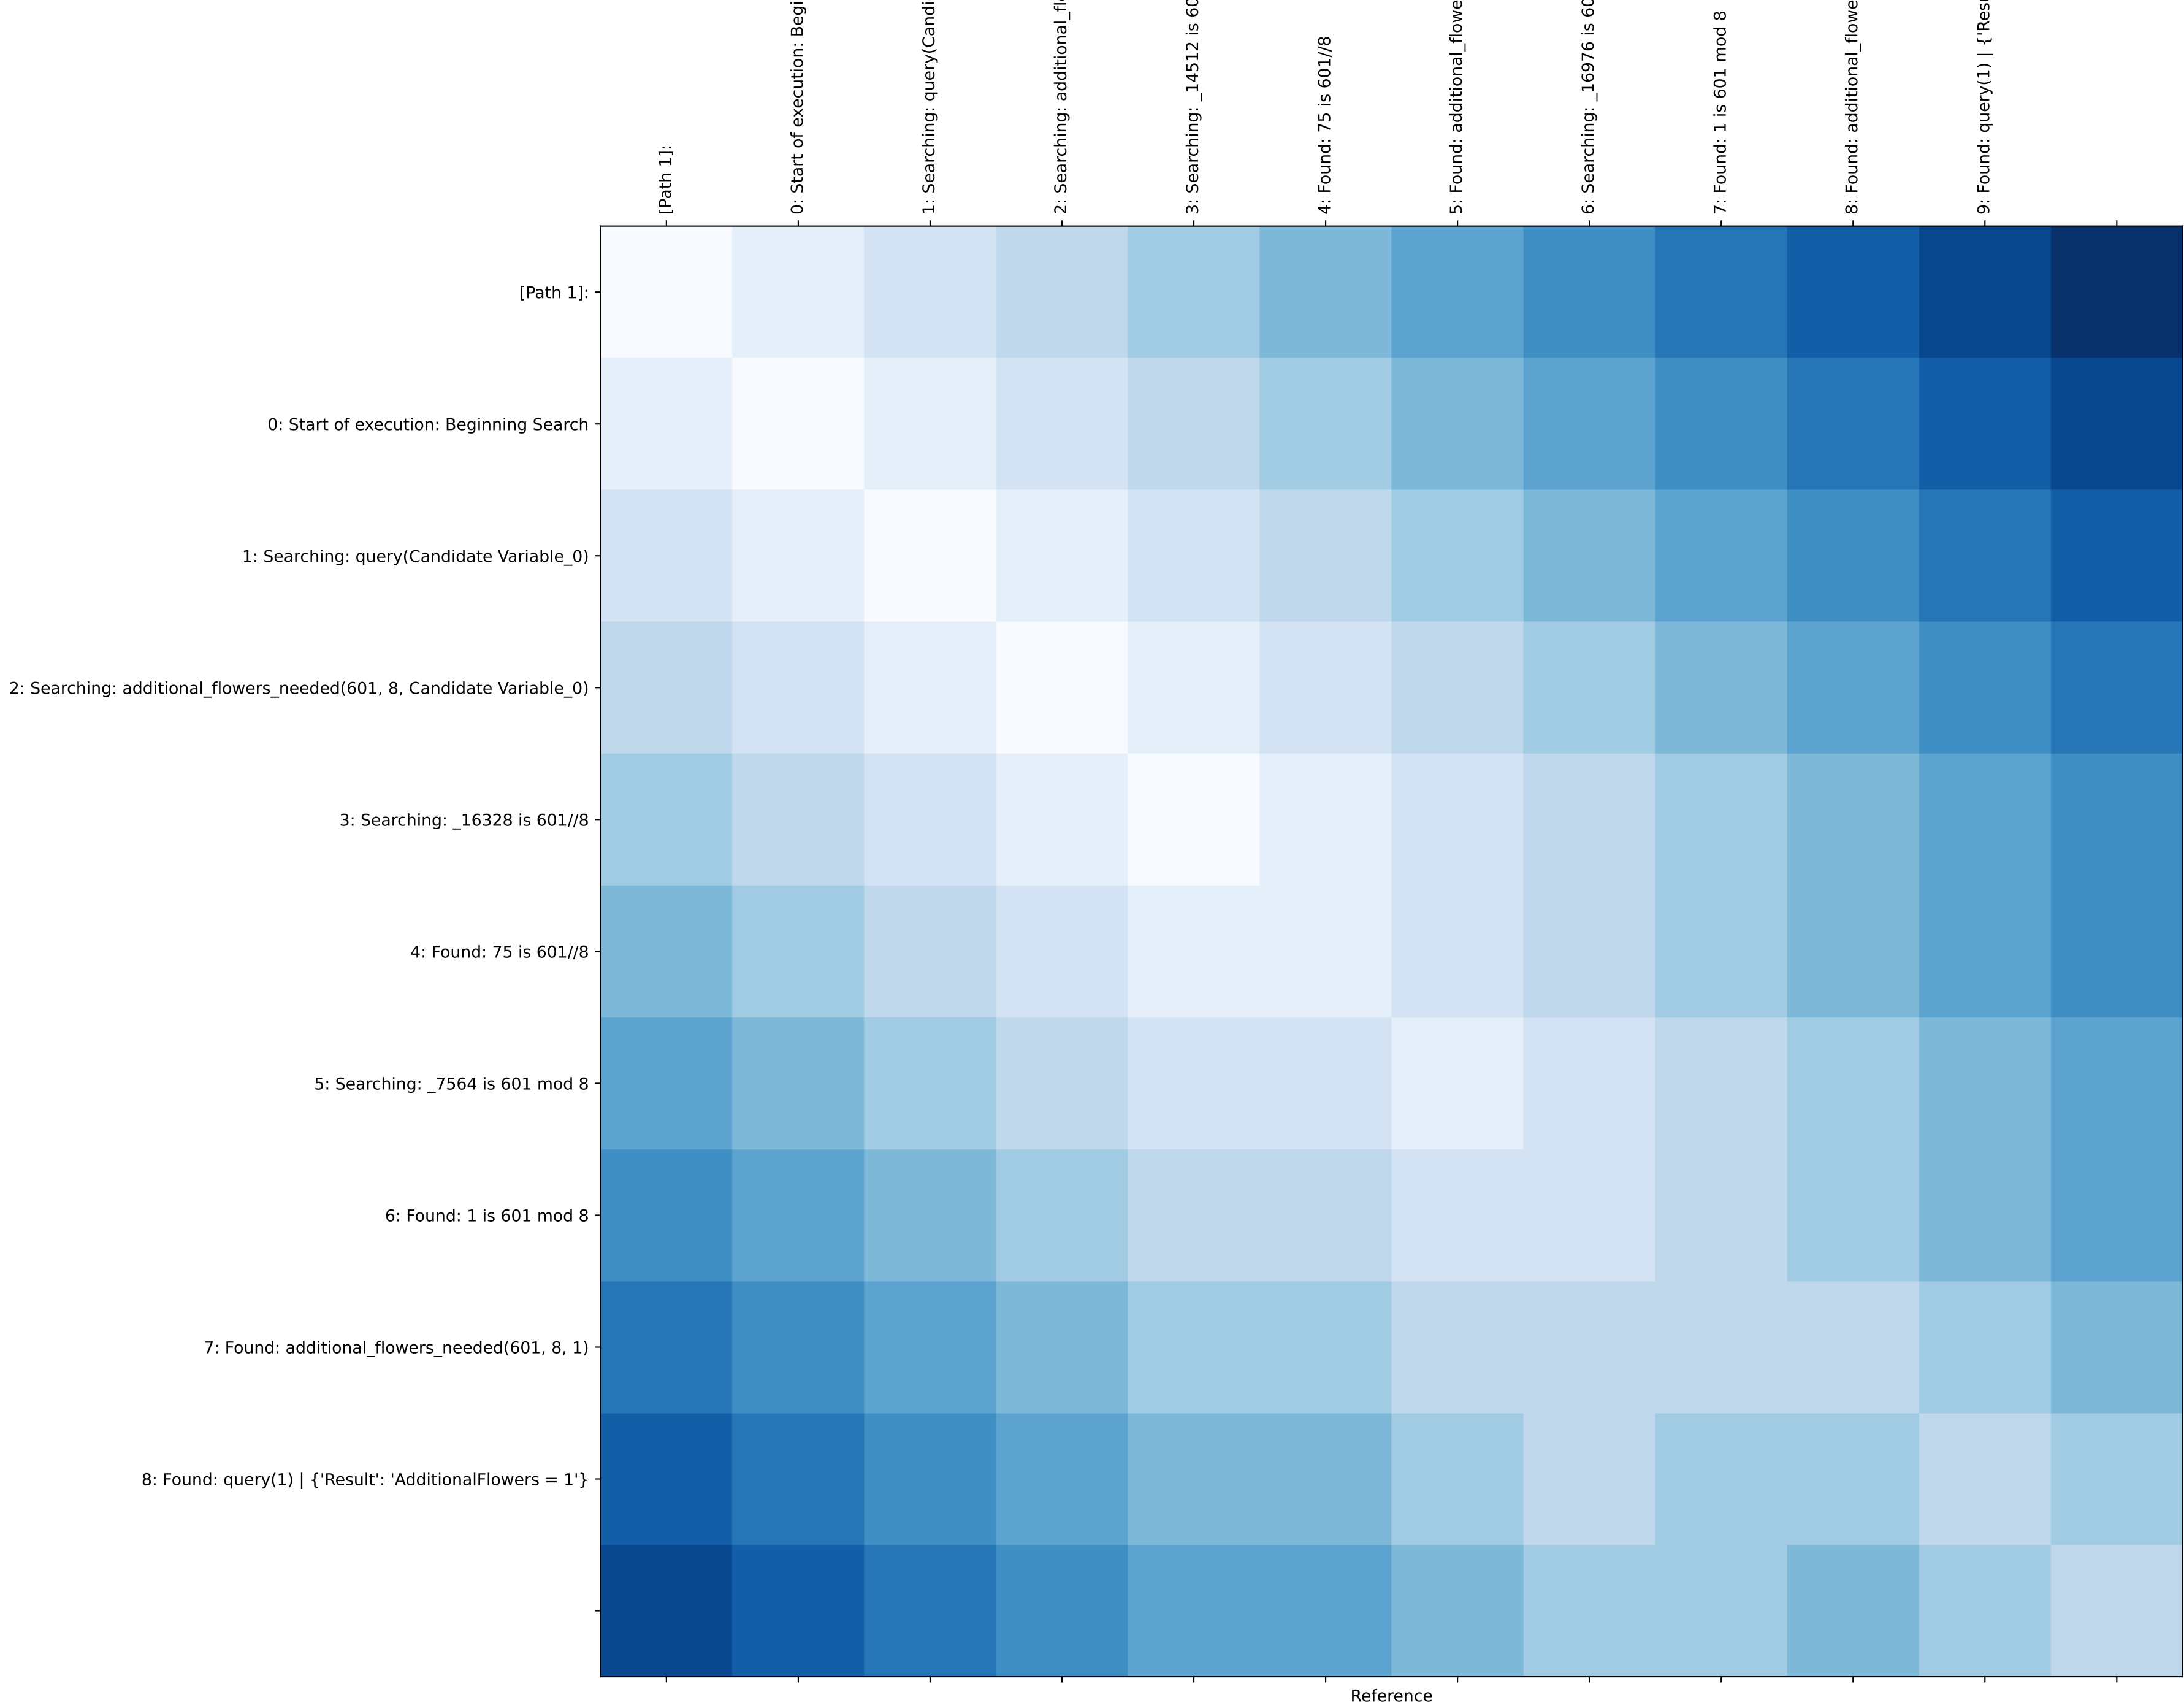

Supplement: supplementary_material [file attachment]

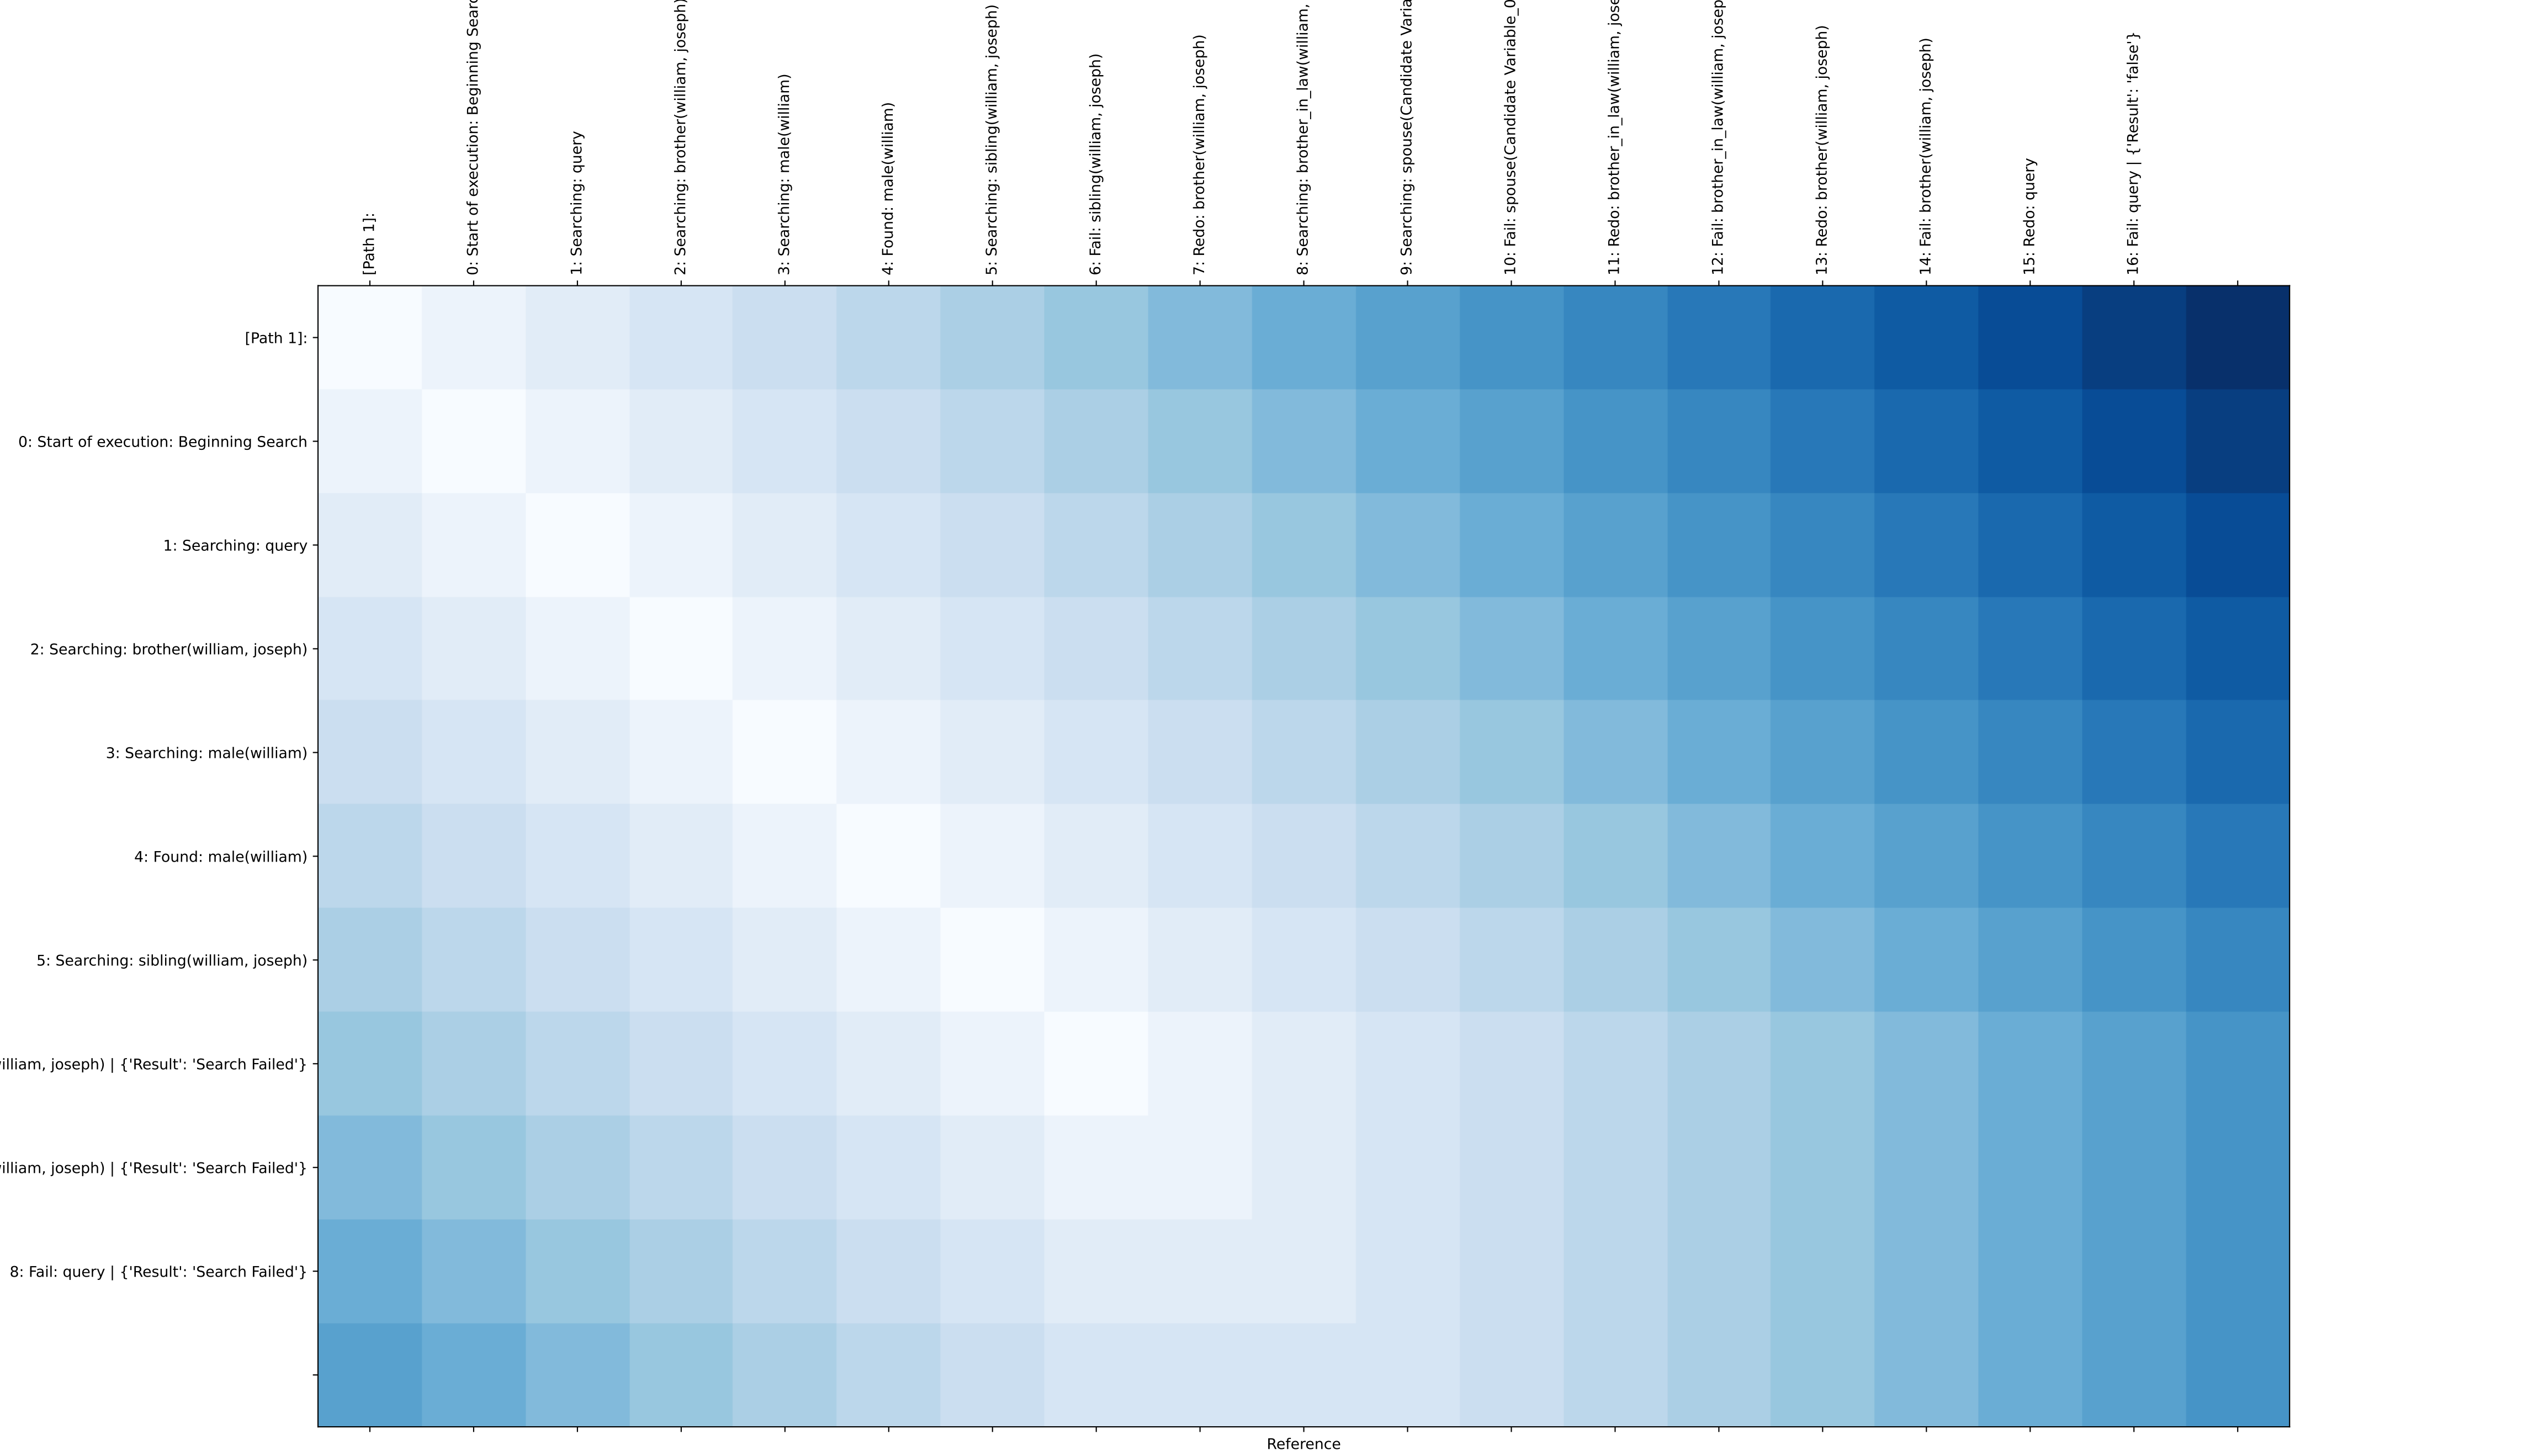

Supplement: supplementary_material [file attachment]

Hypothesis

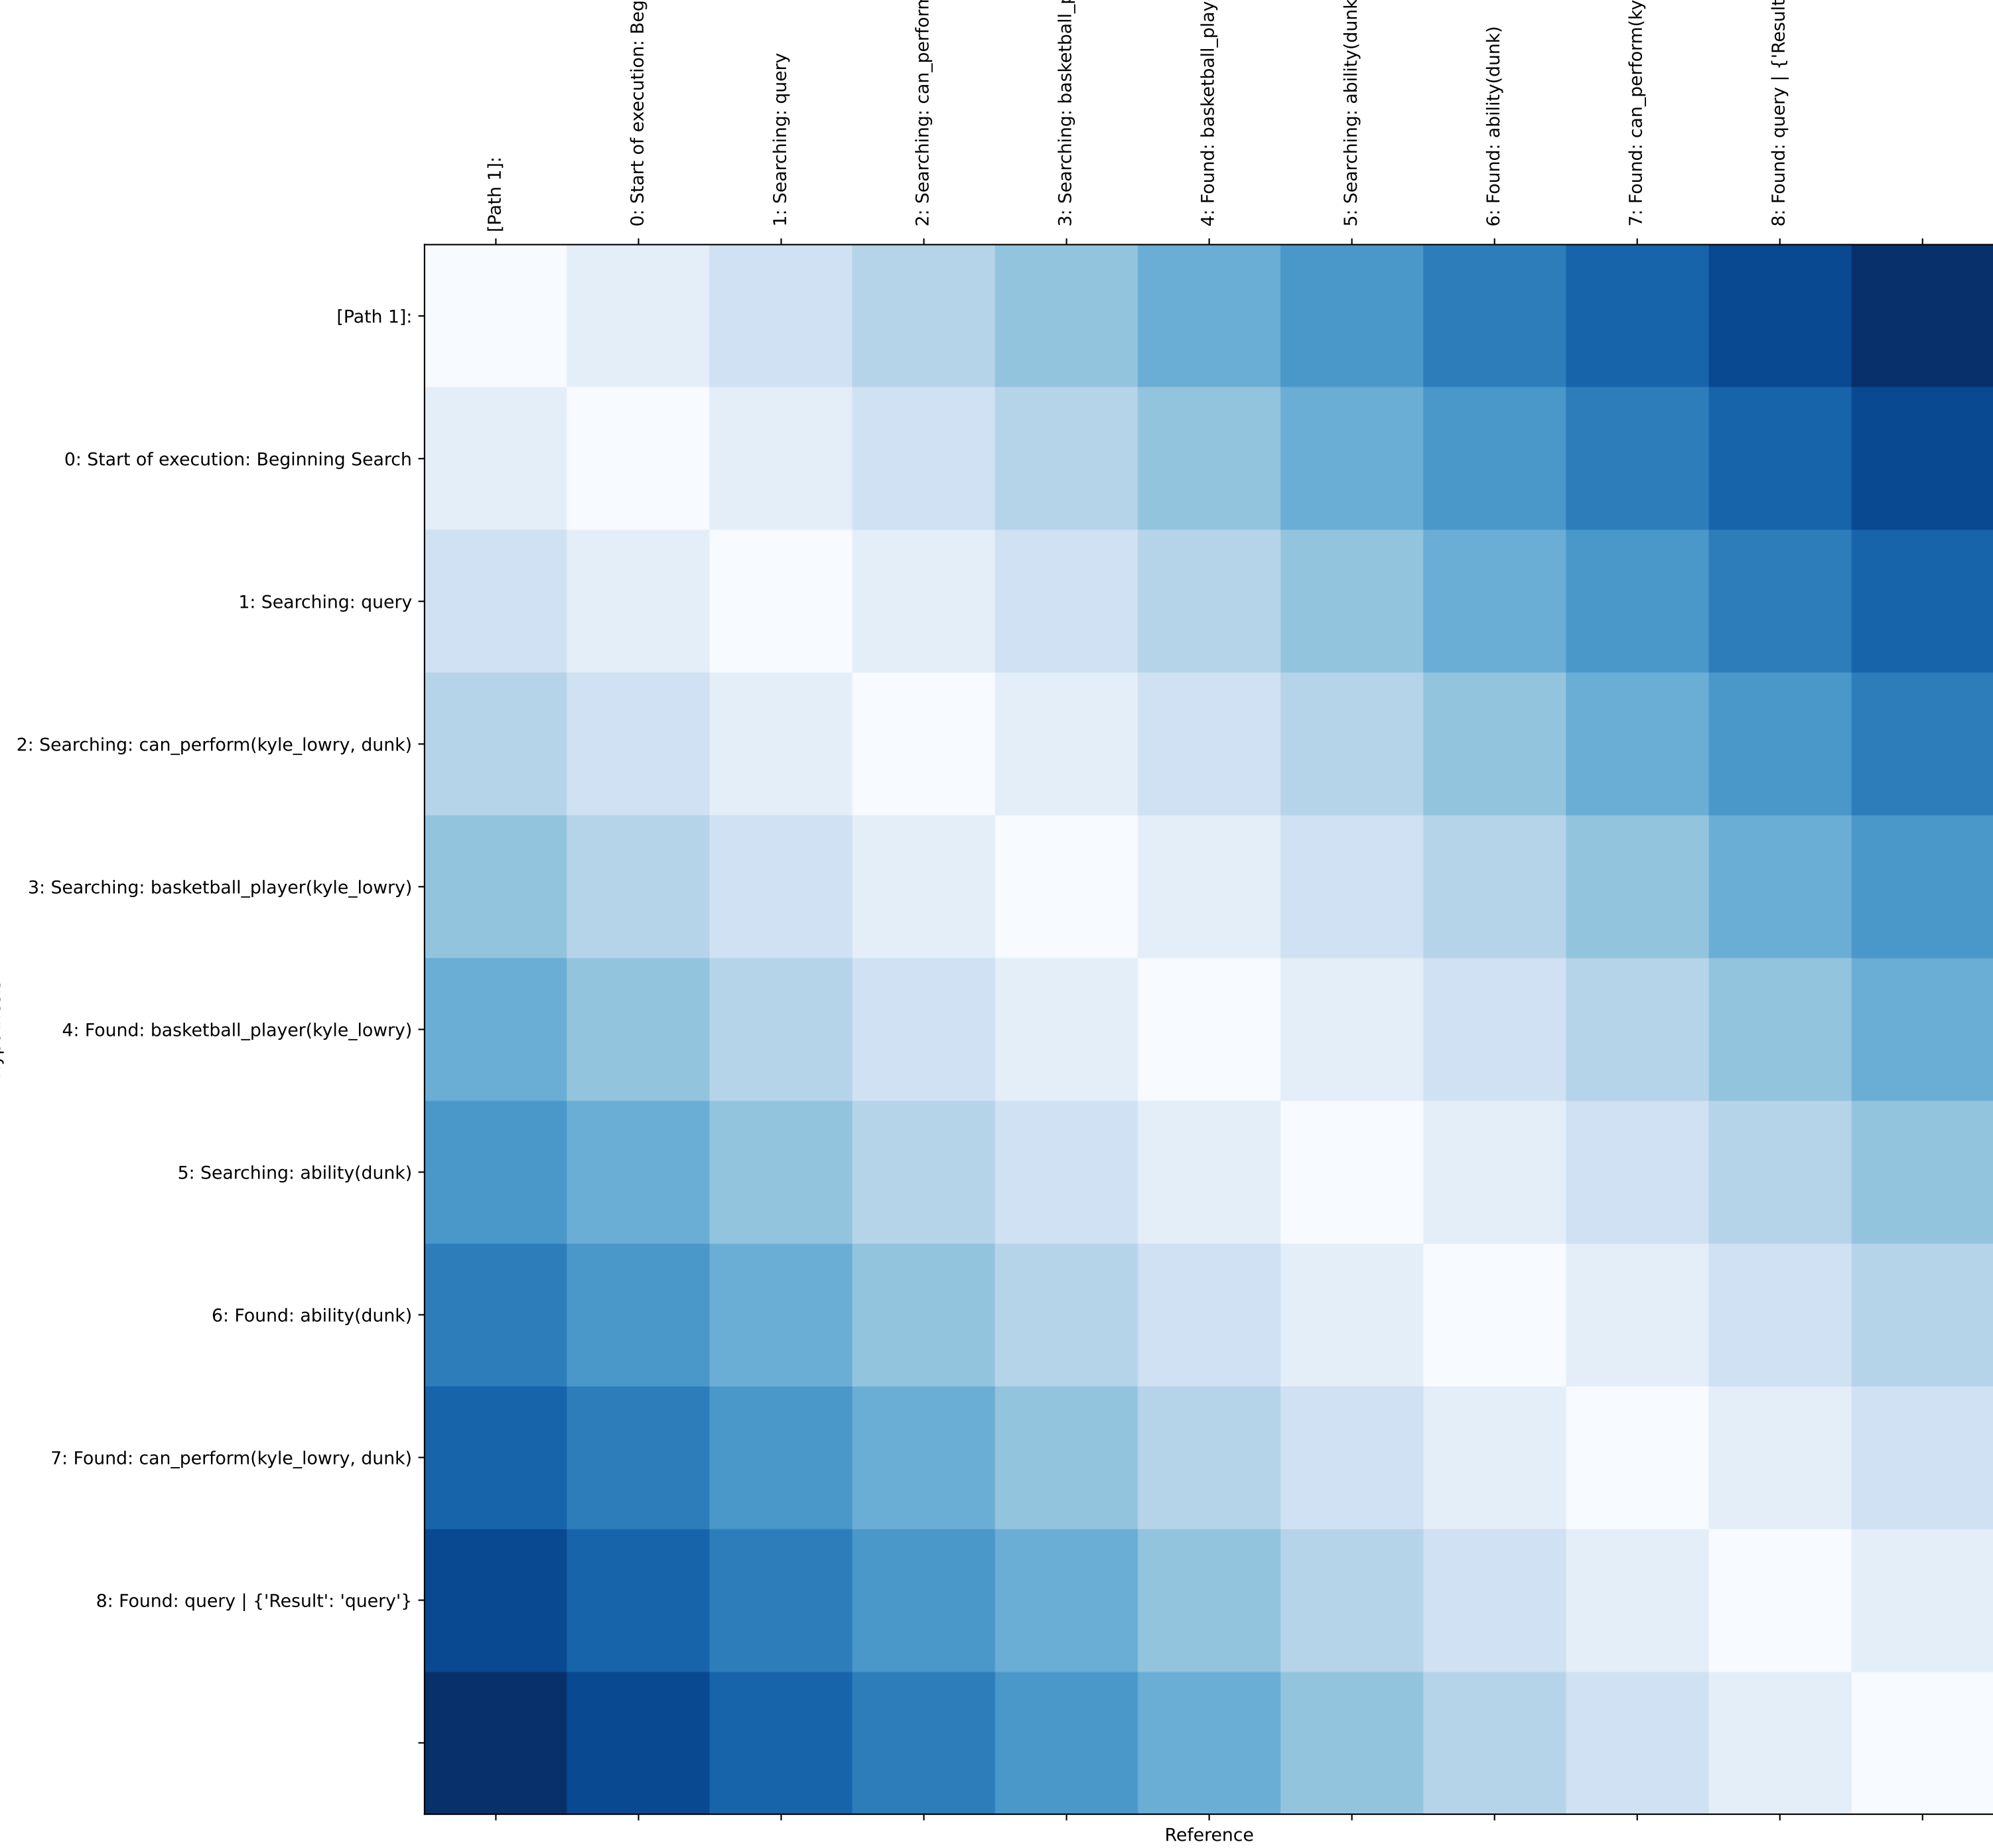

Reference

Supplement: supplementary_material [file attachment]

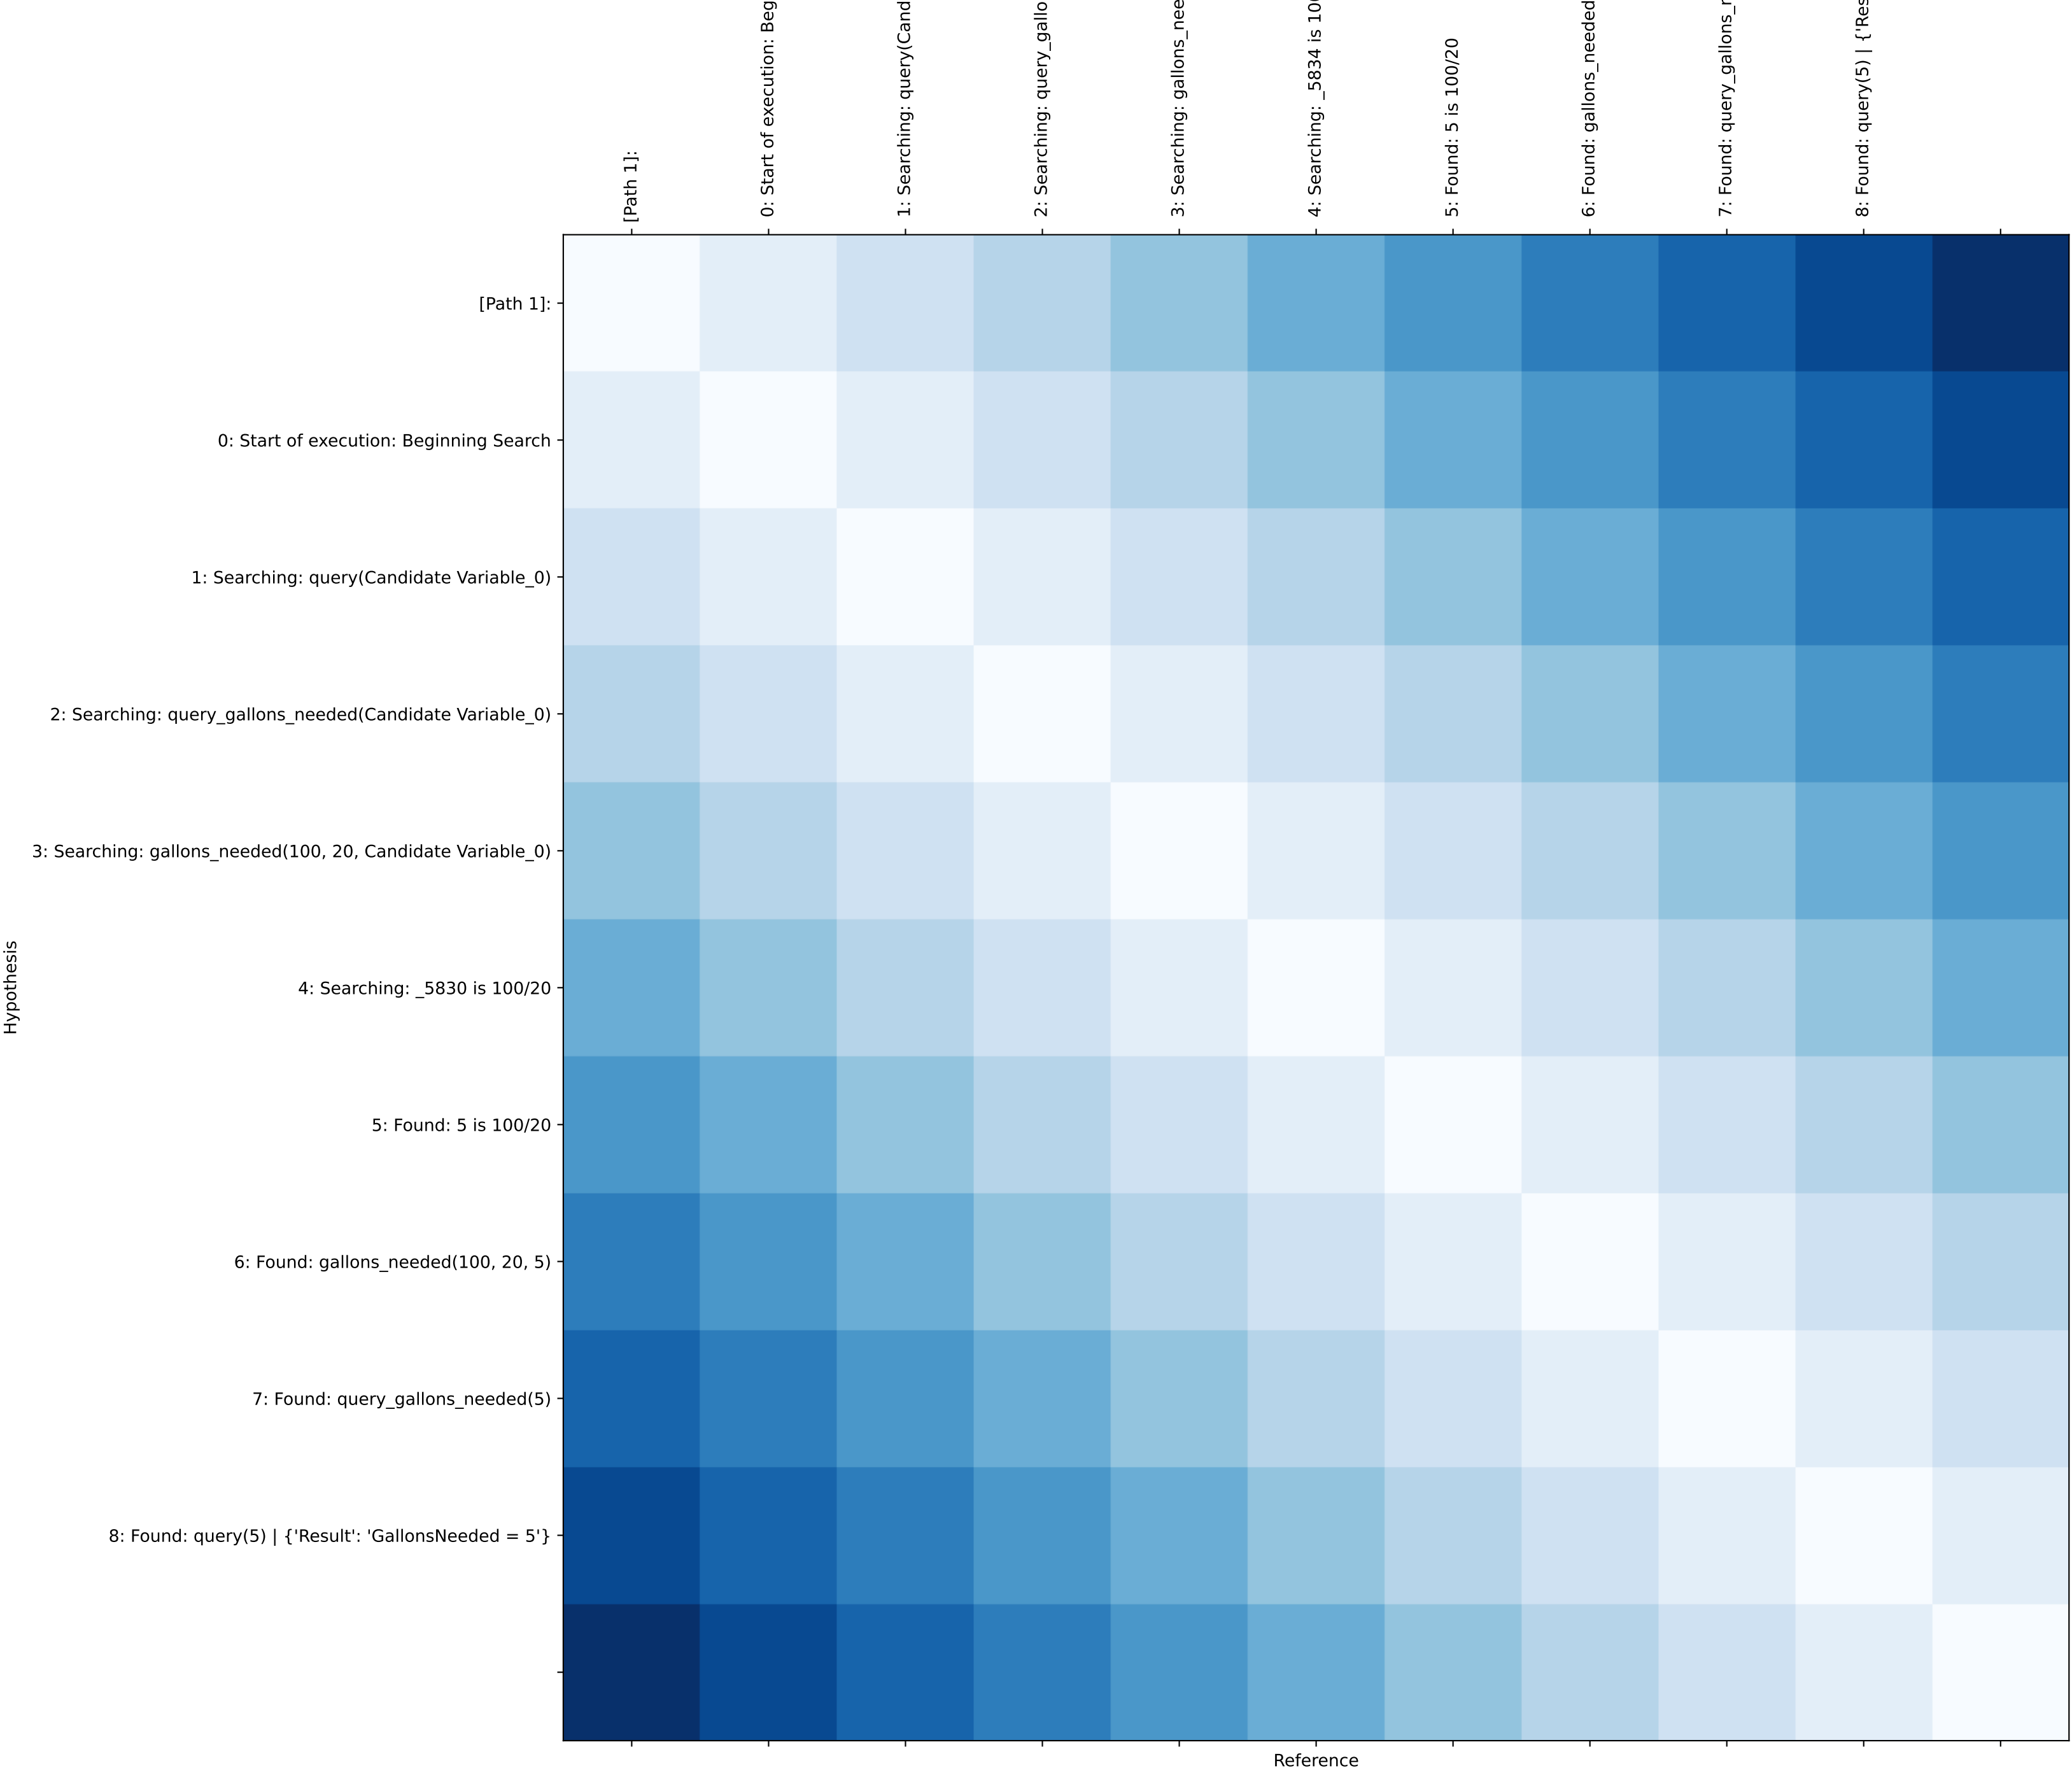

Supplement: supplementary_material [file attachment]

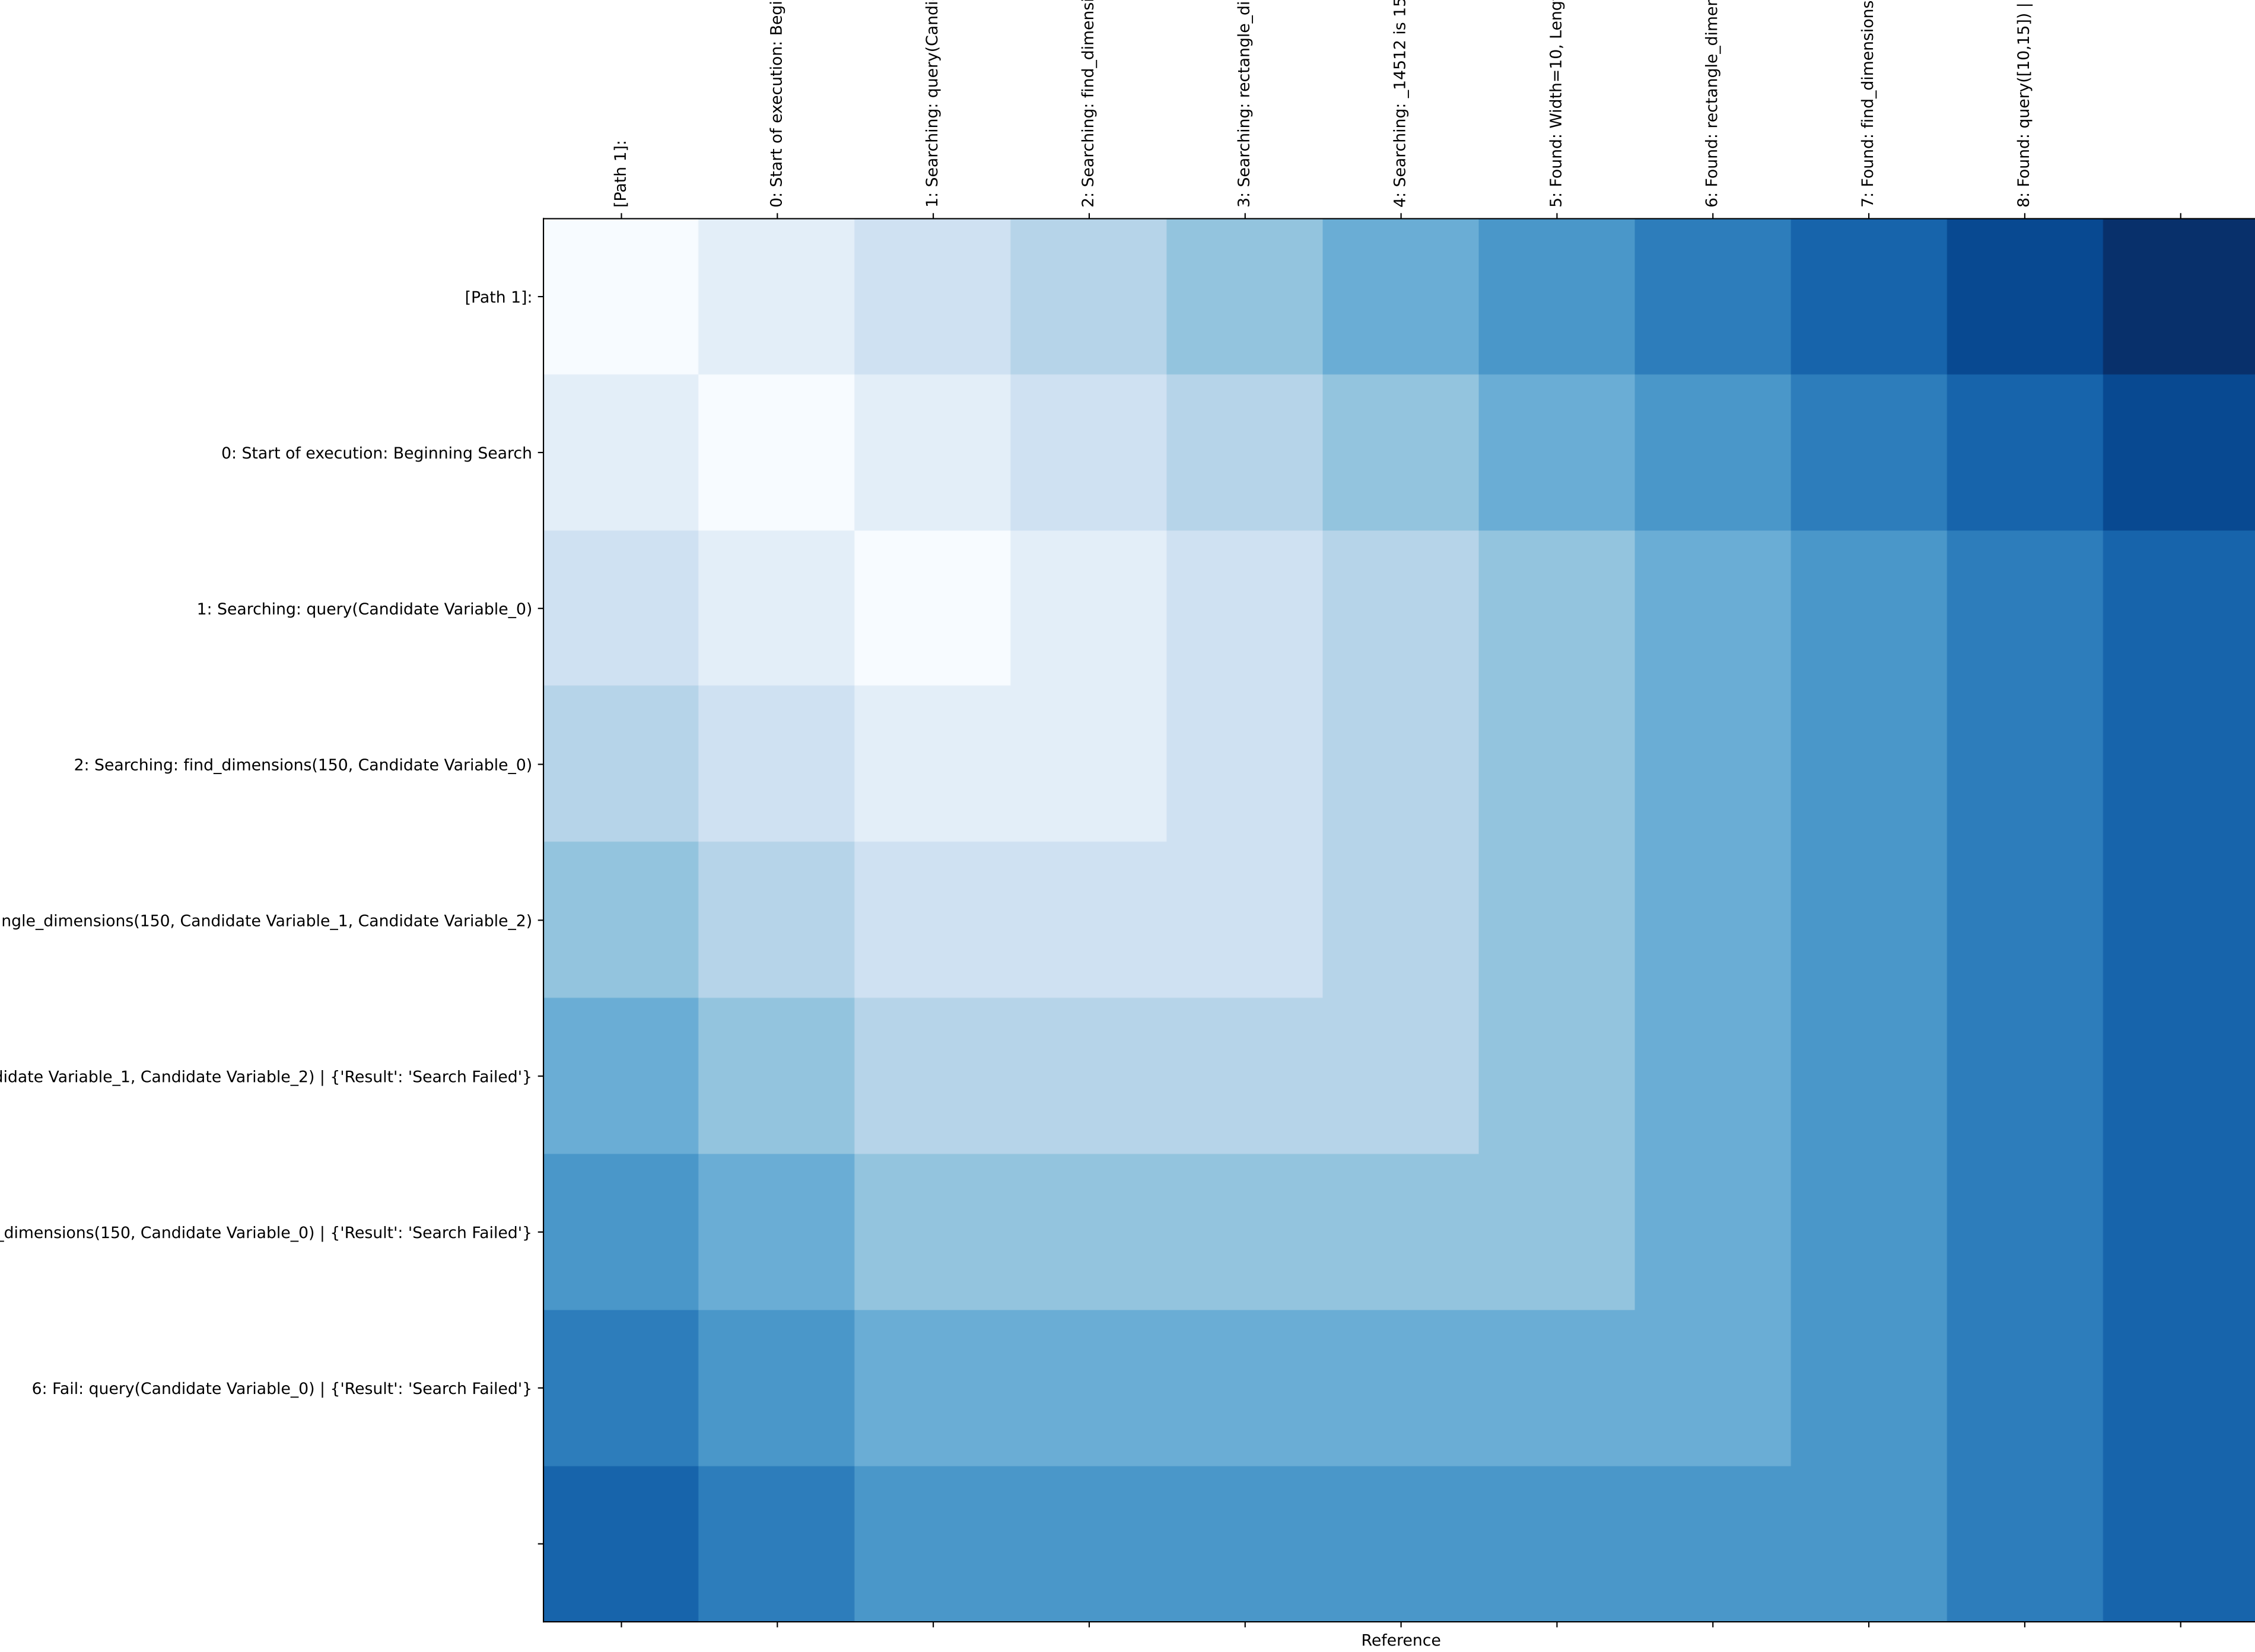

Supplement: supplementary_material [file attachment]

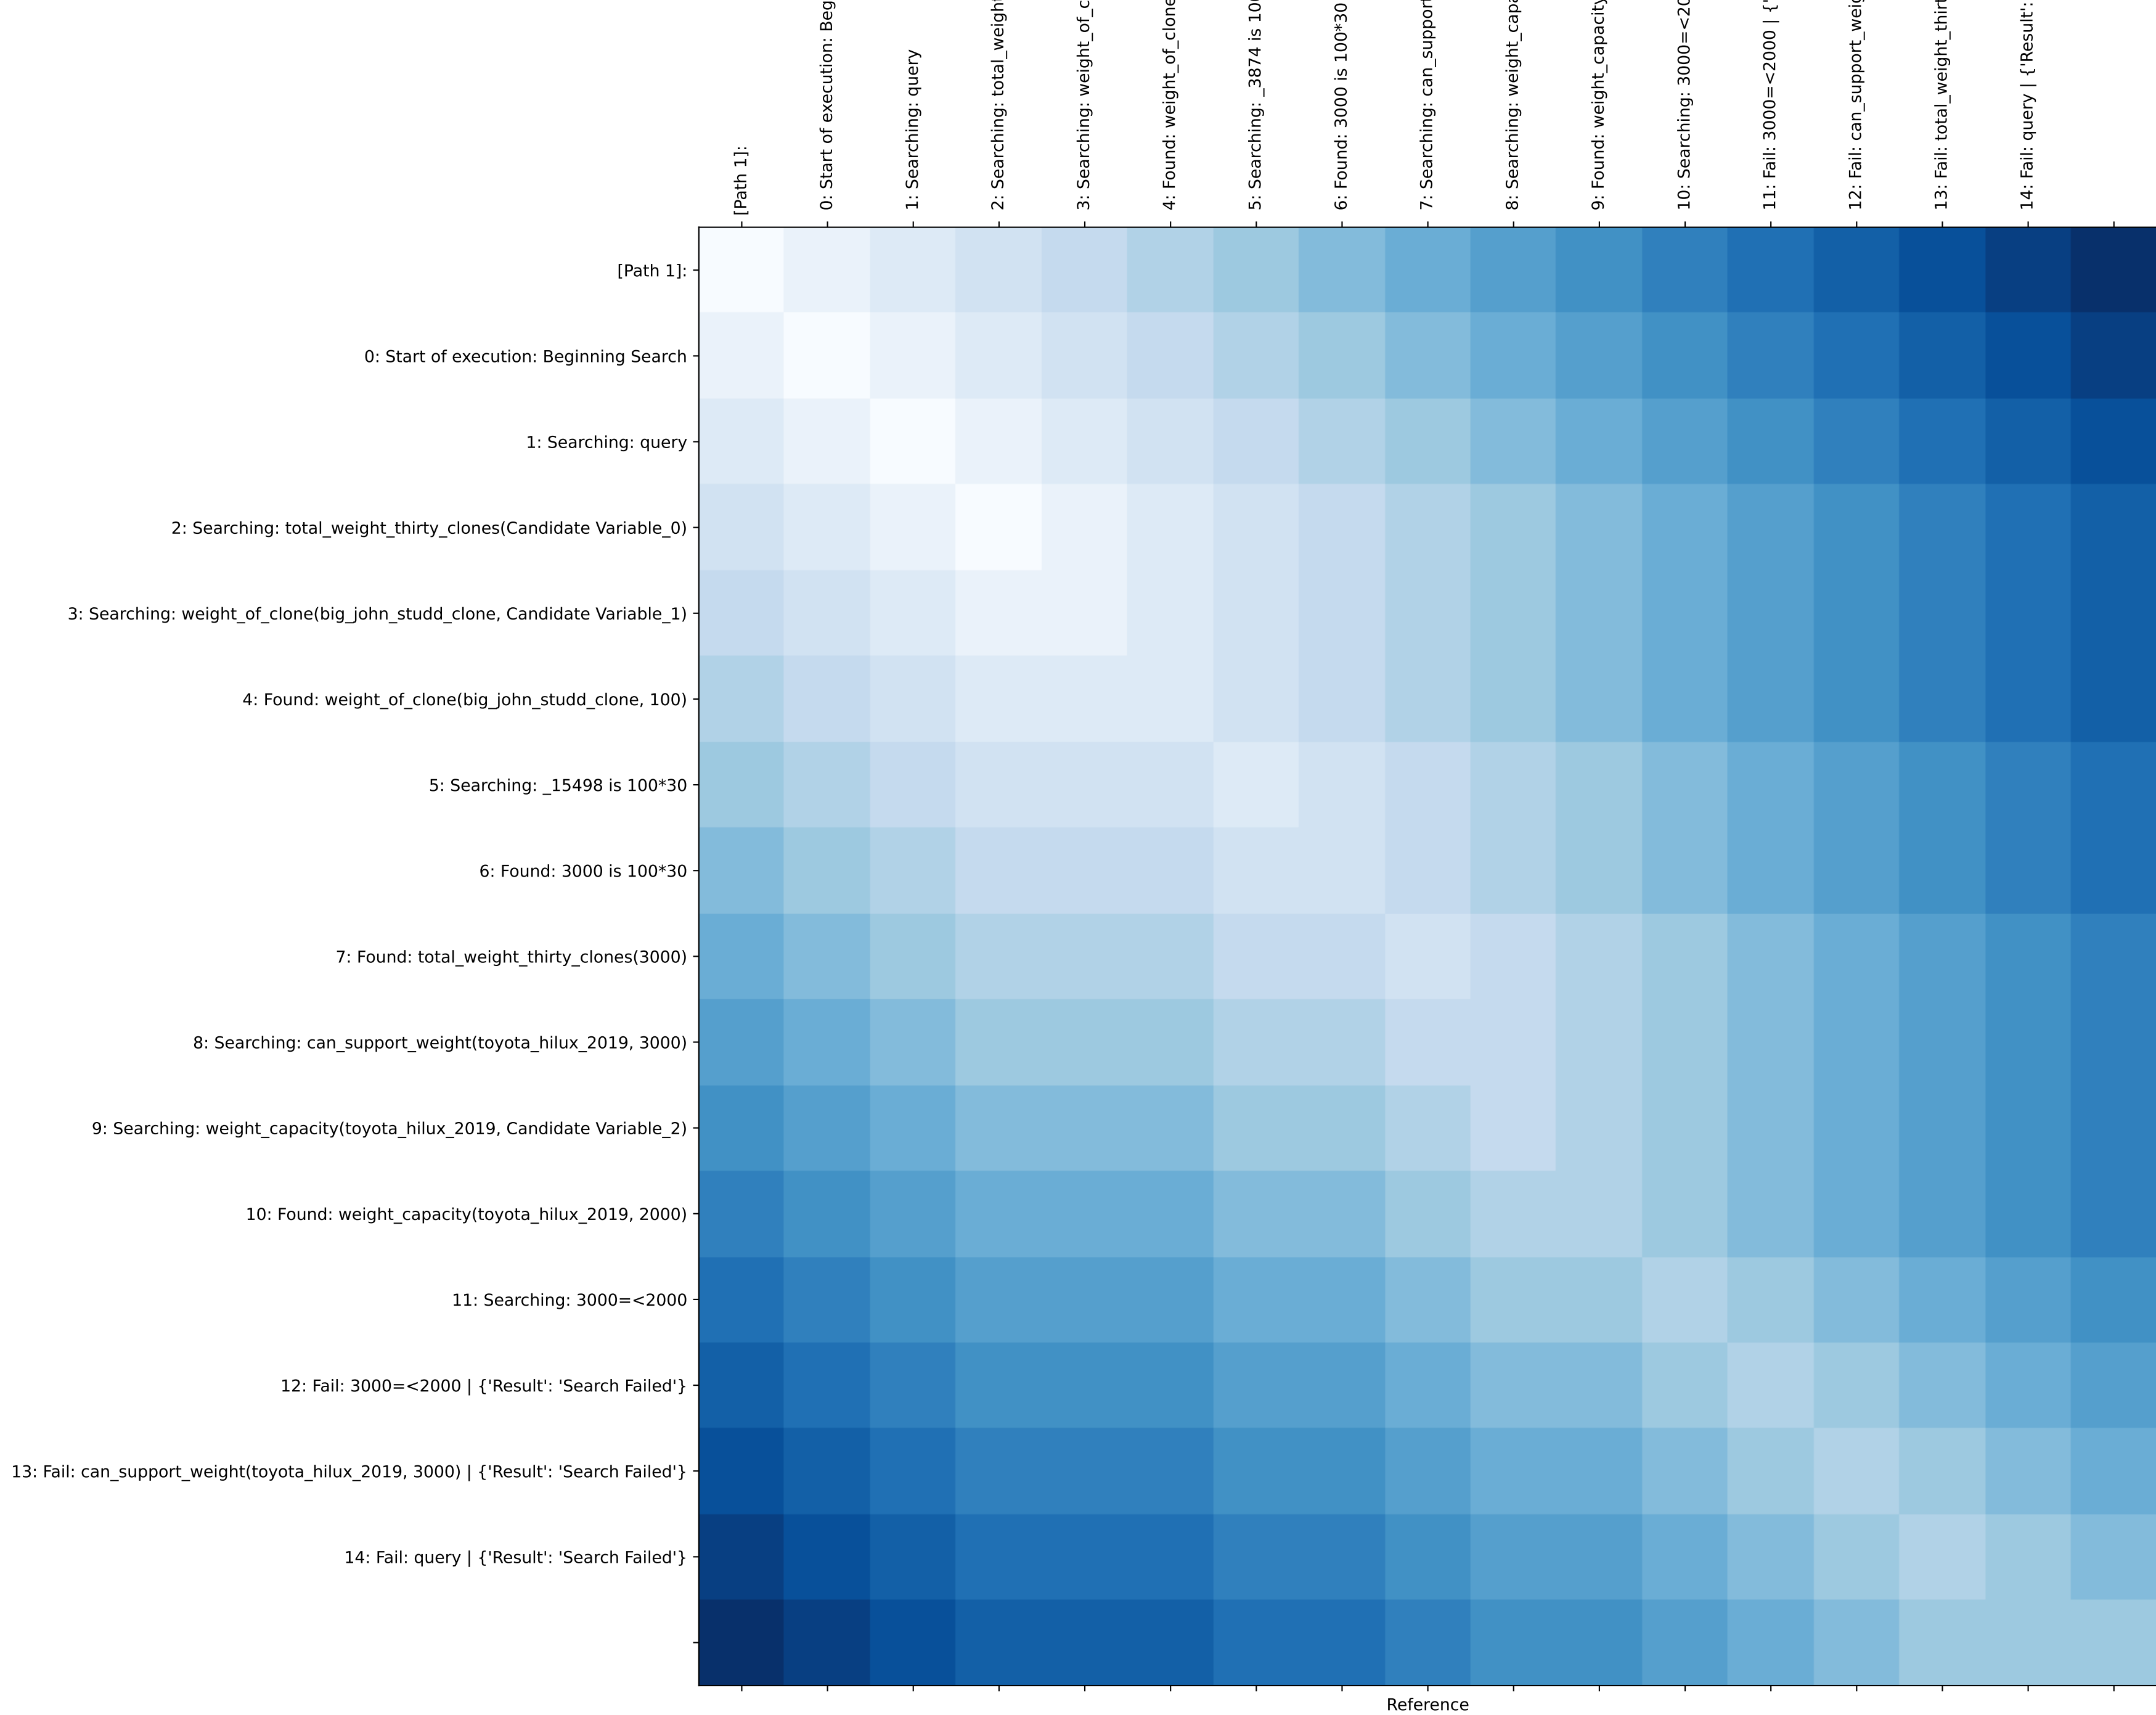

Supplement: supplementary_material [file attachment]

Hypothesis

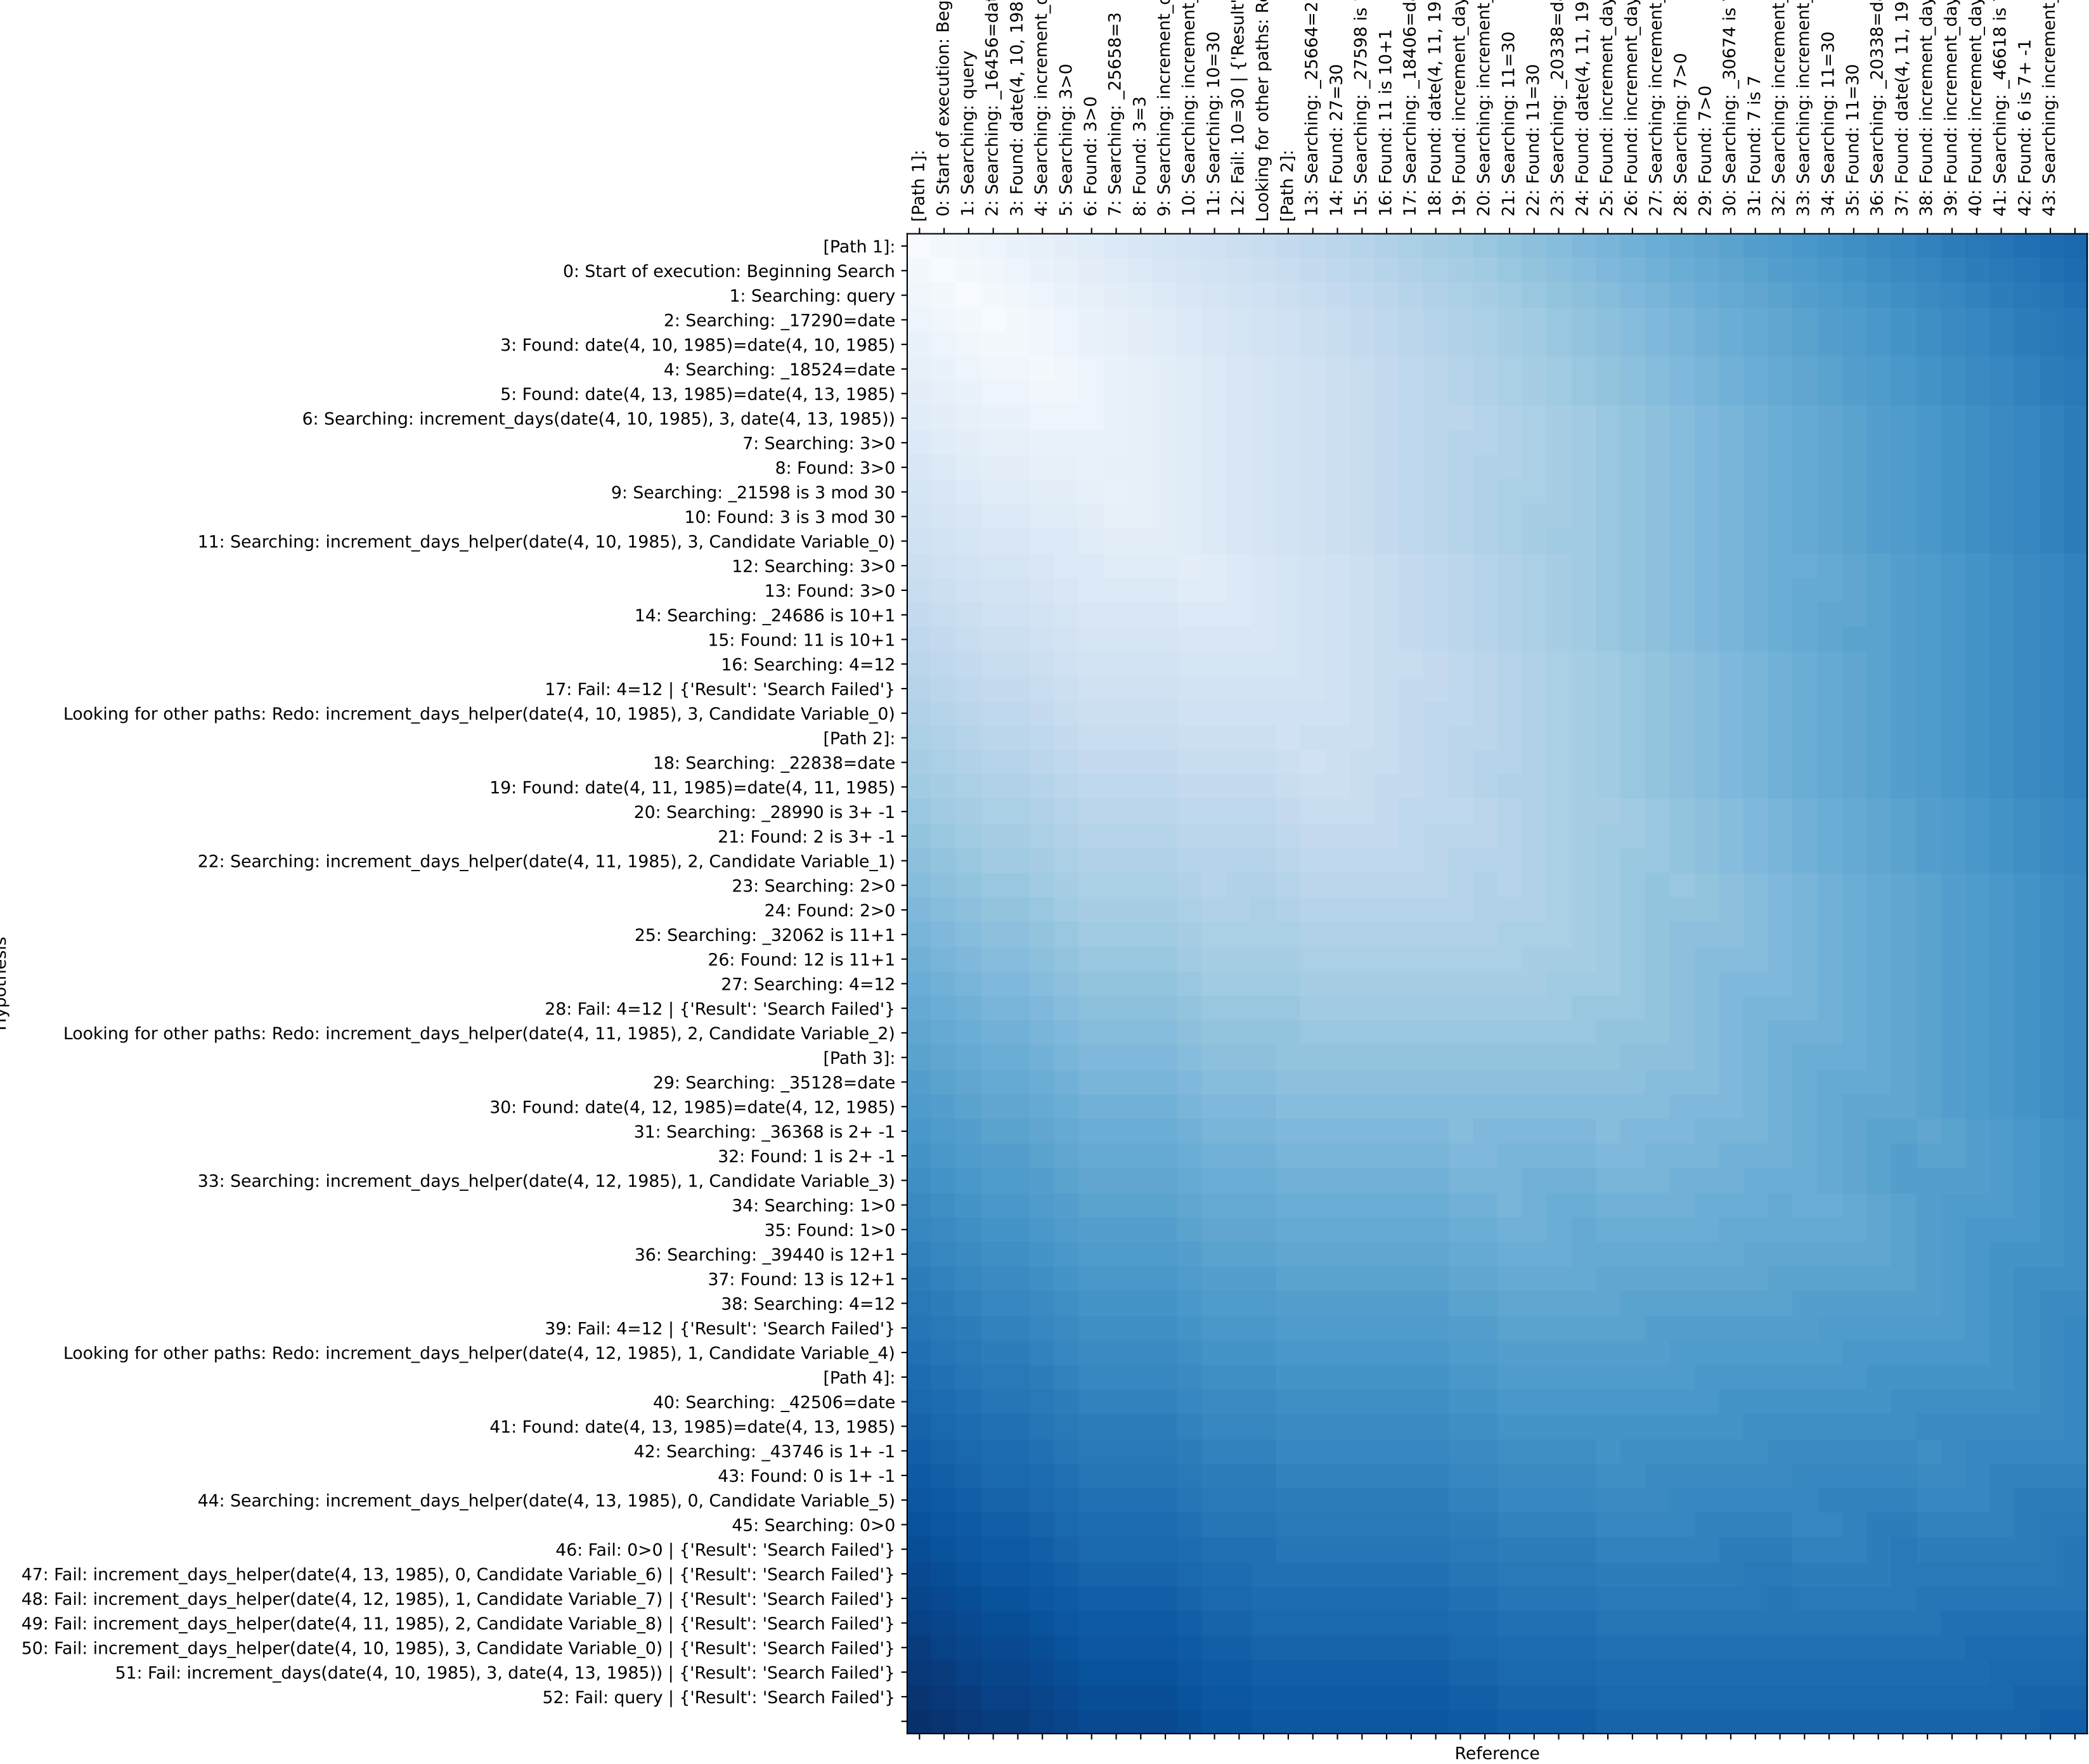

Supplement: supplementary_material [file attachment]

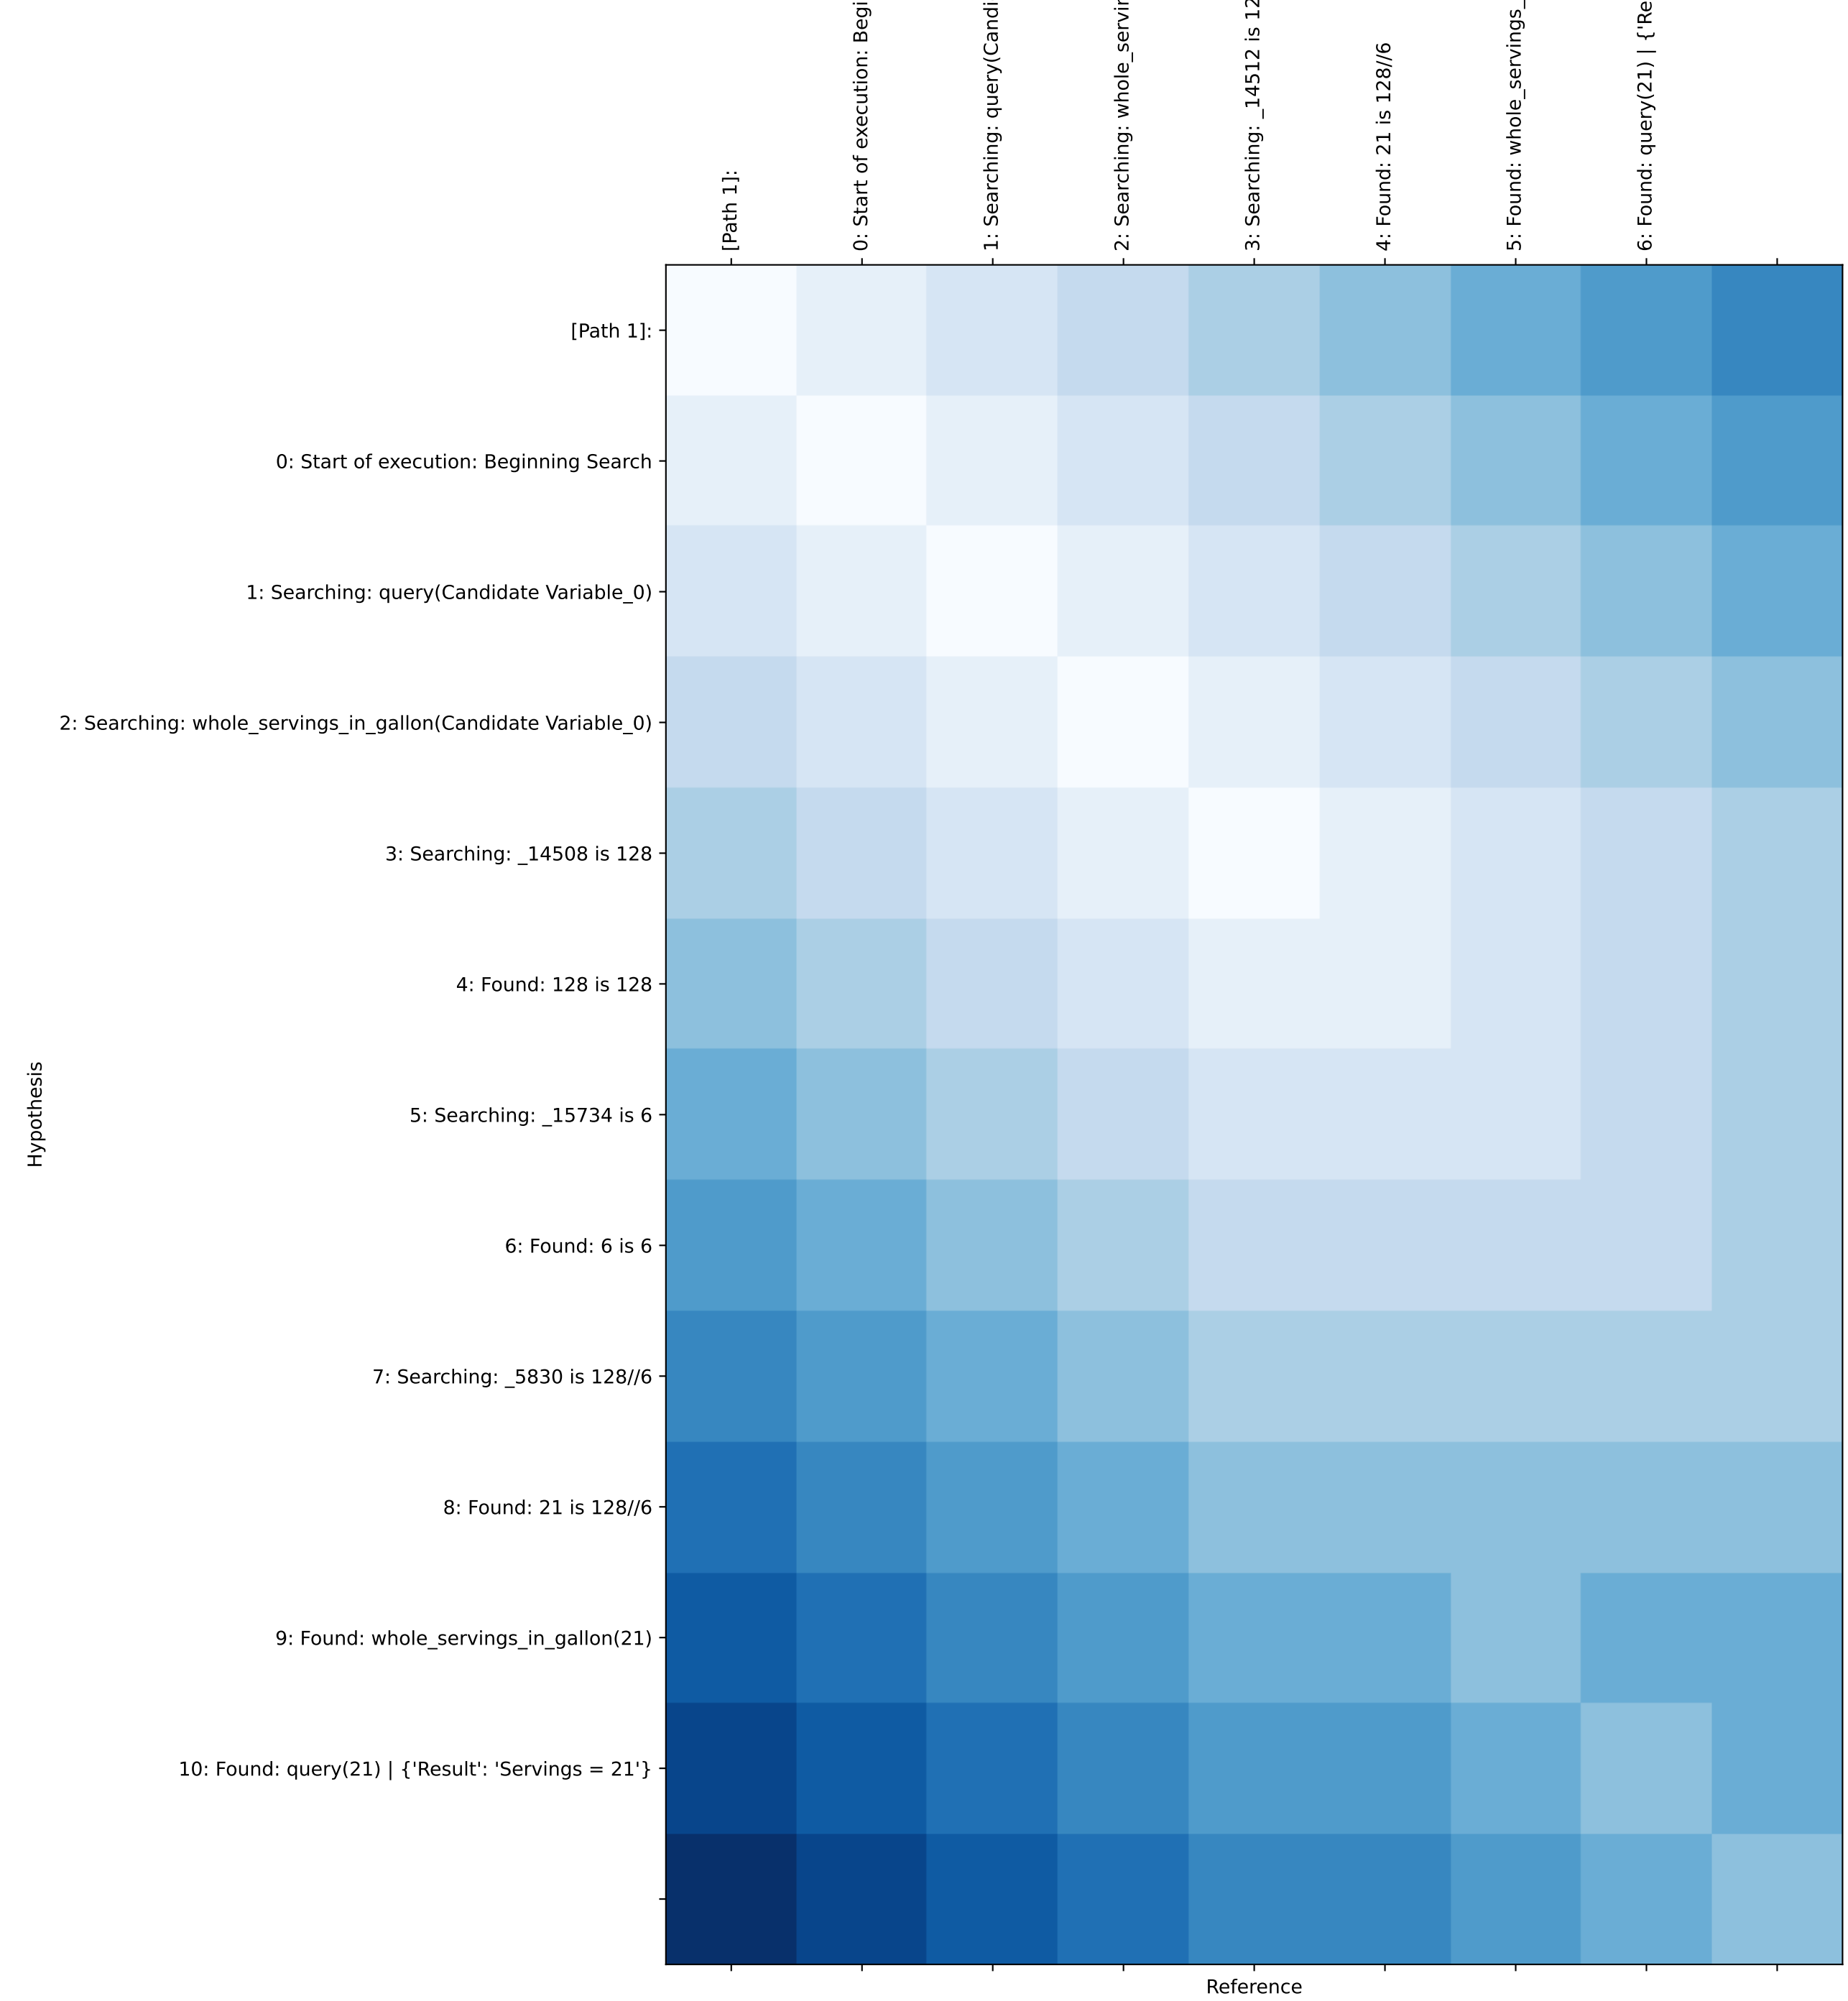

Supplement: supplementary_material [file attachment]

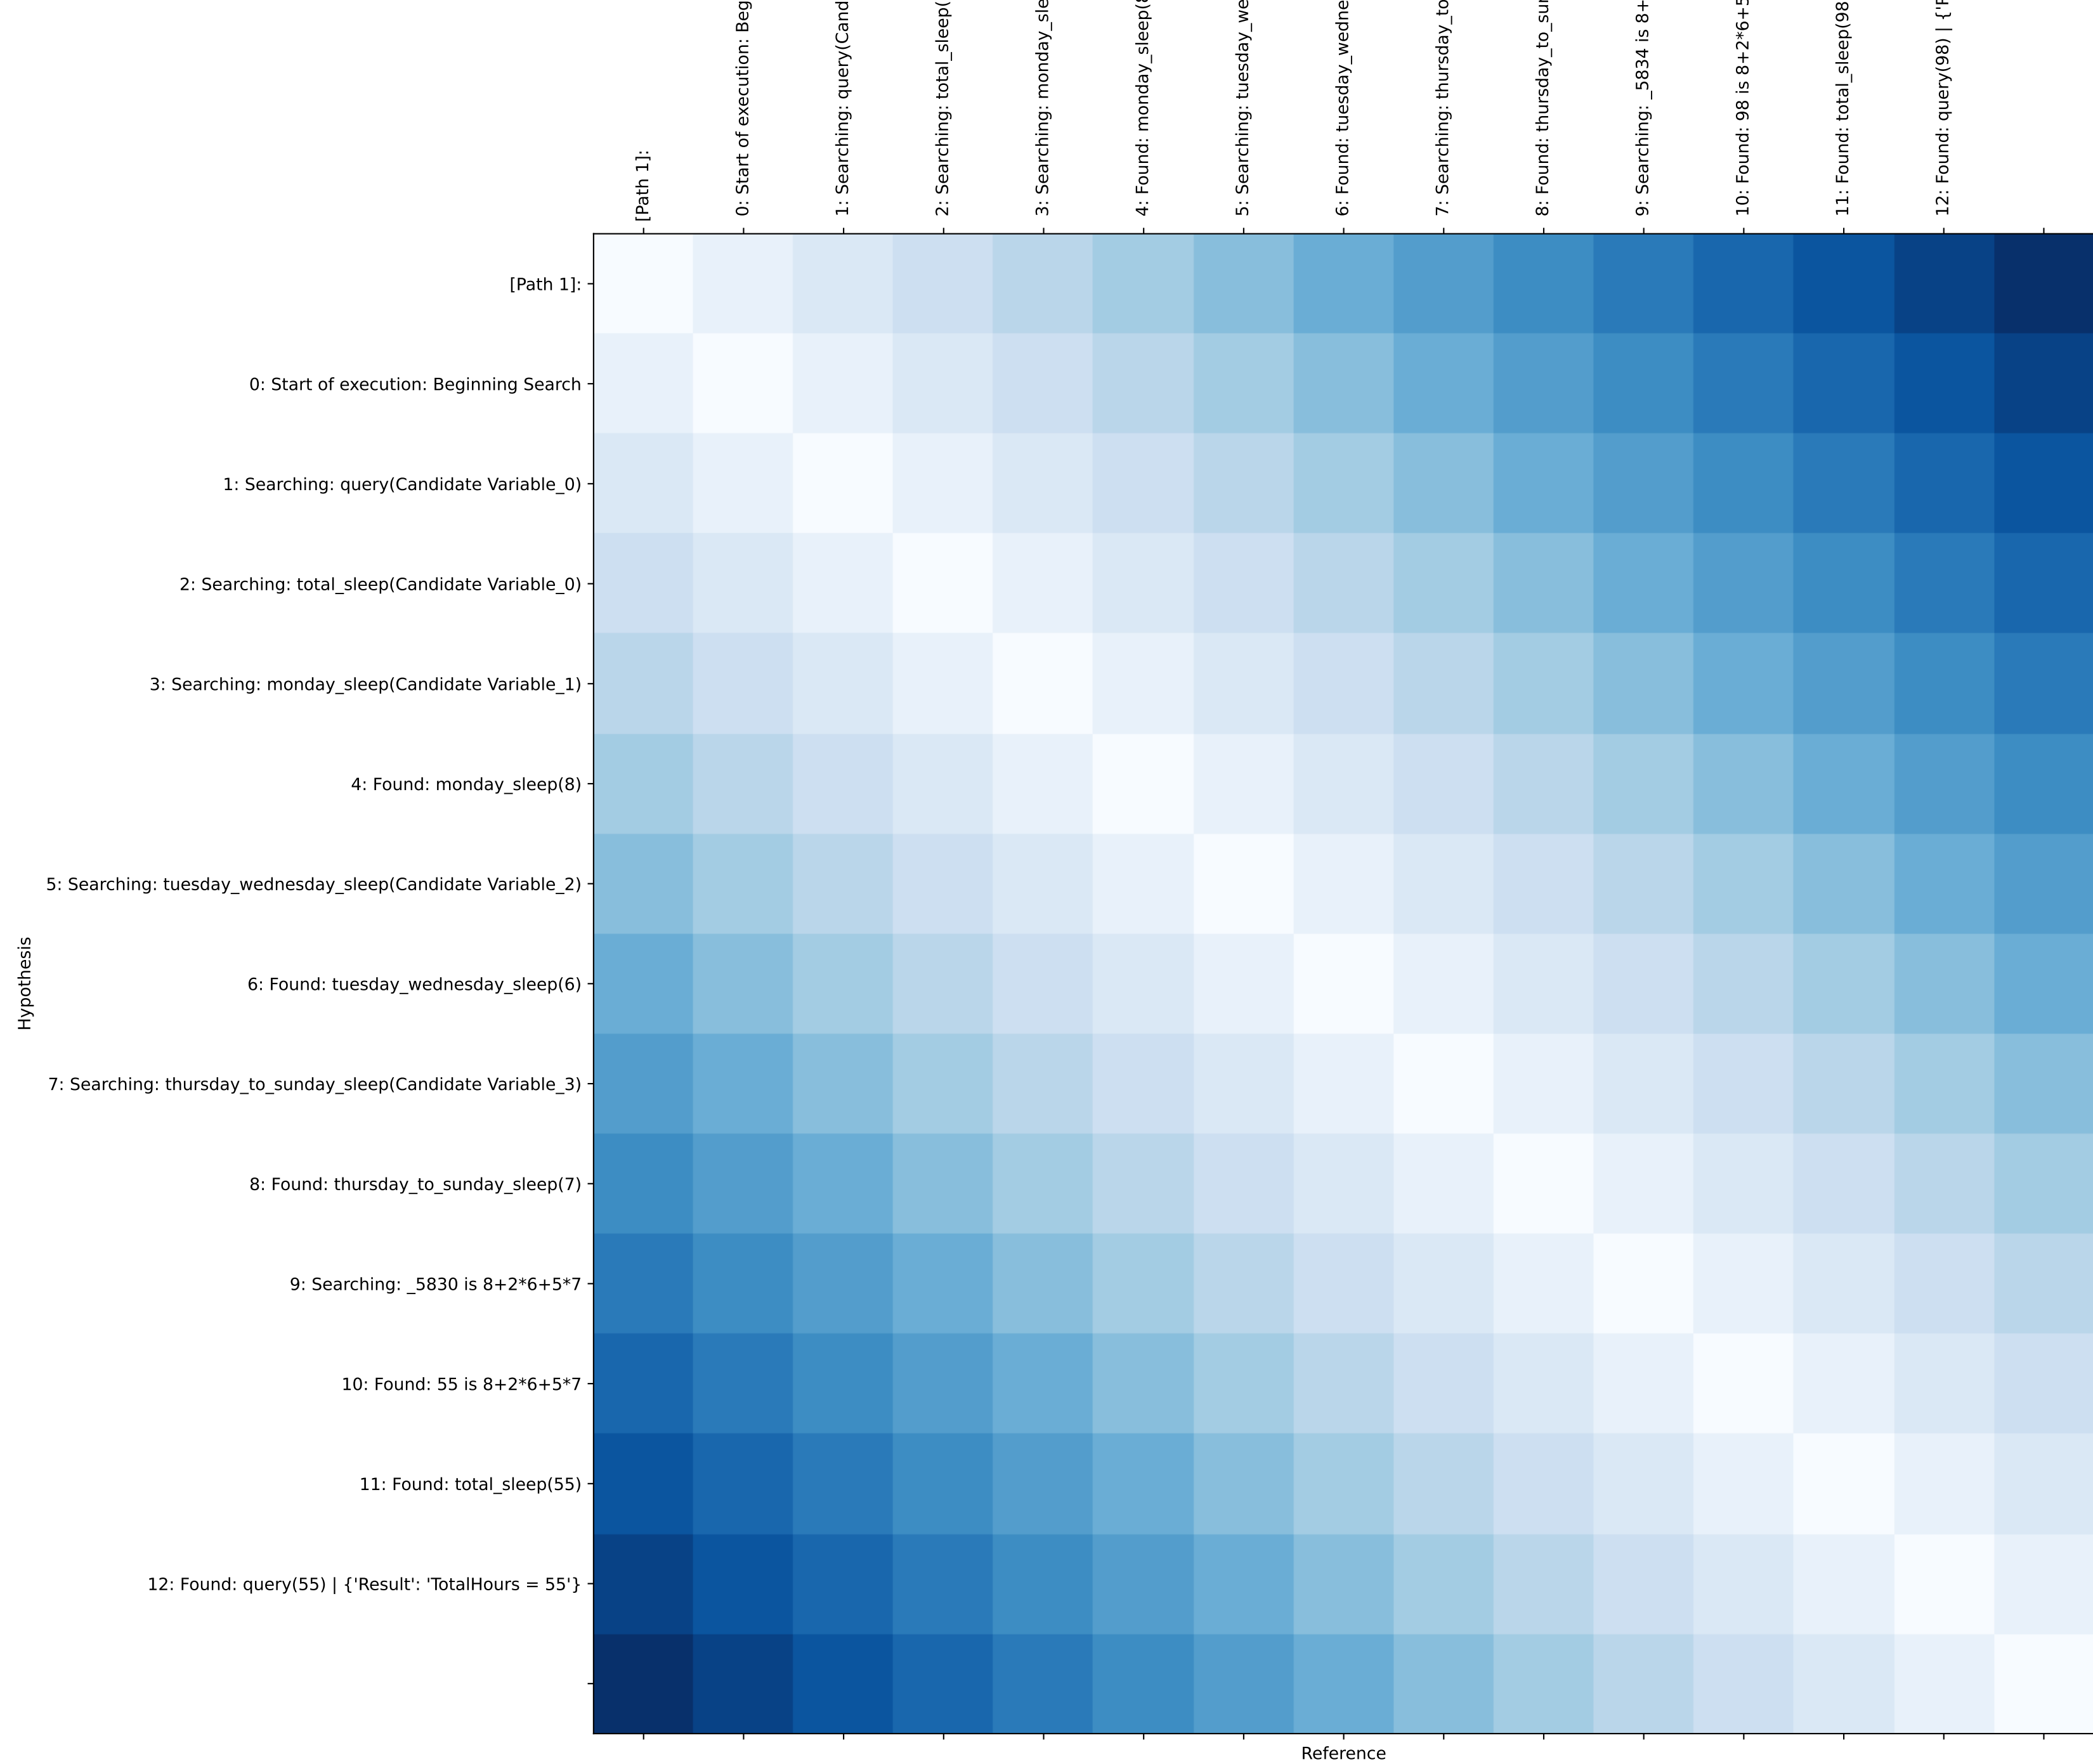

Supplement: supplementary_material [file attachment]

Hypothesis

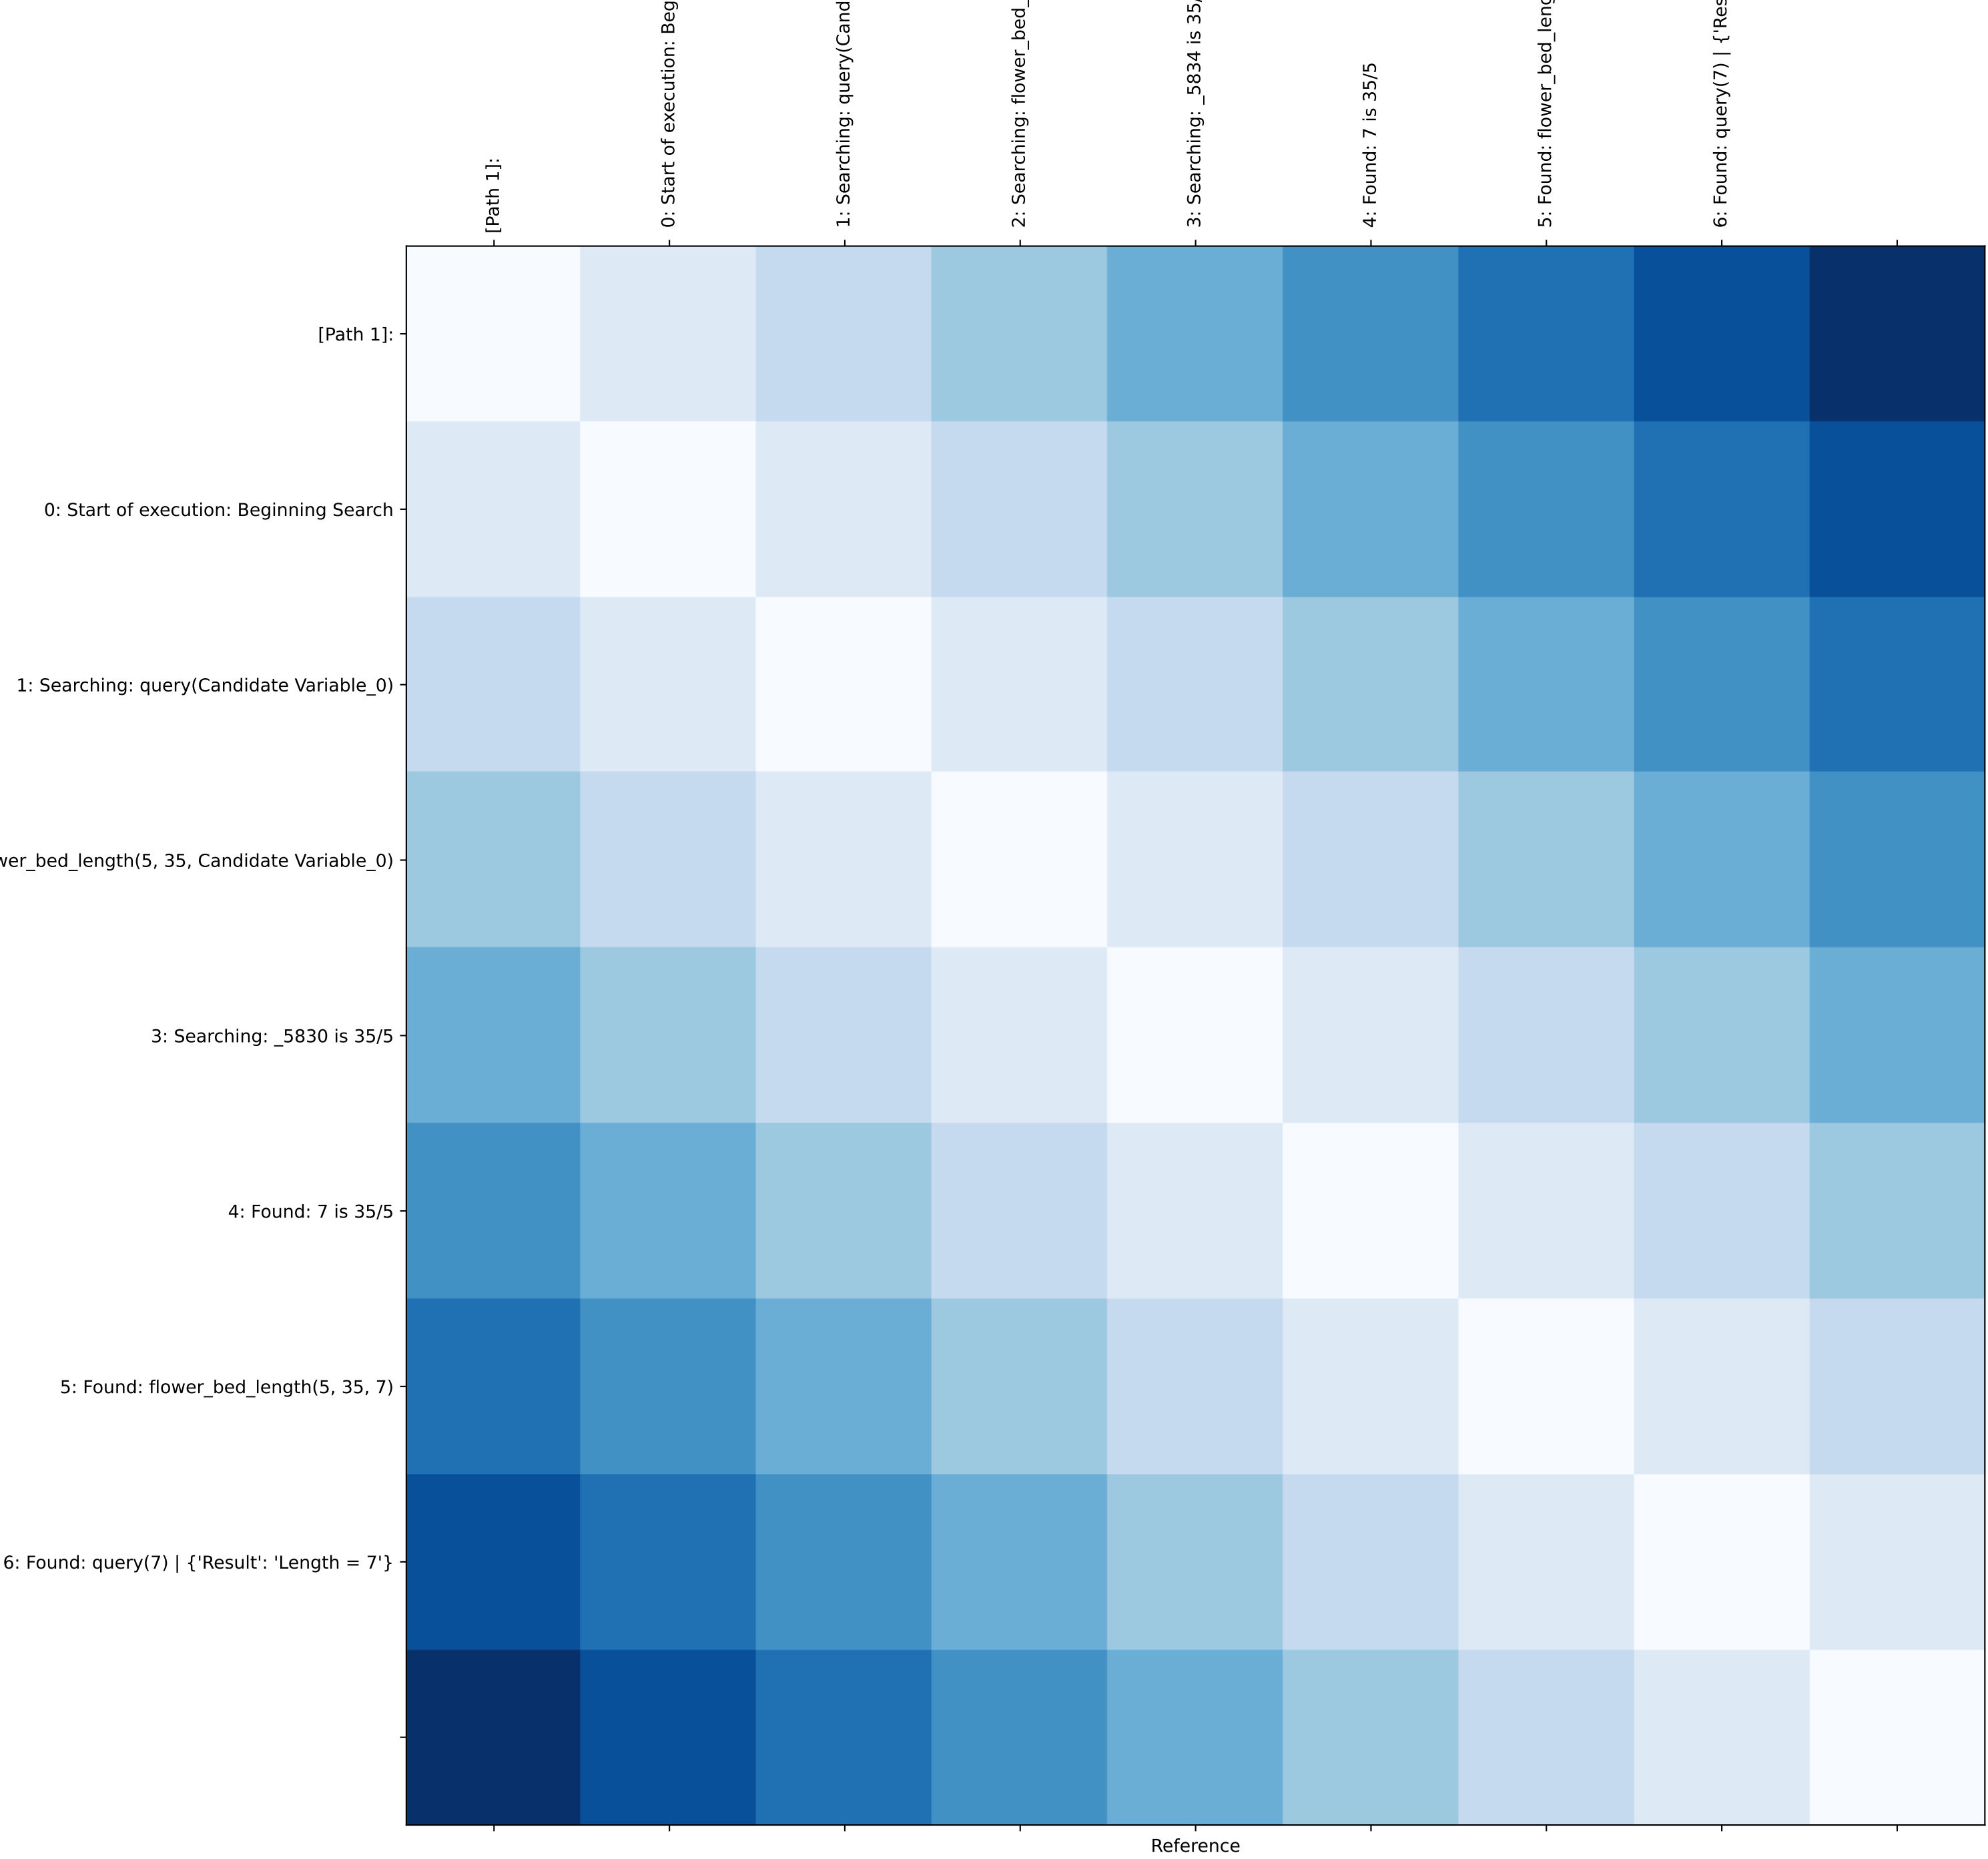

Supplement: supplementary_material [file attachment]

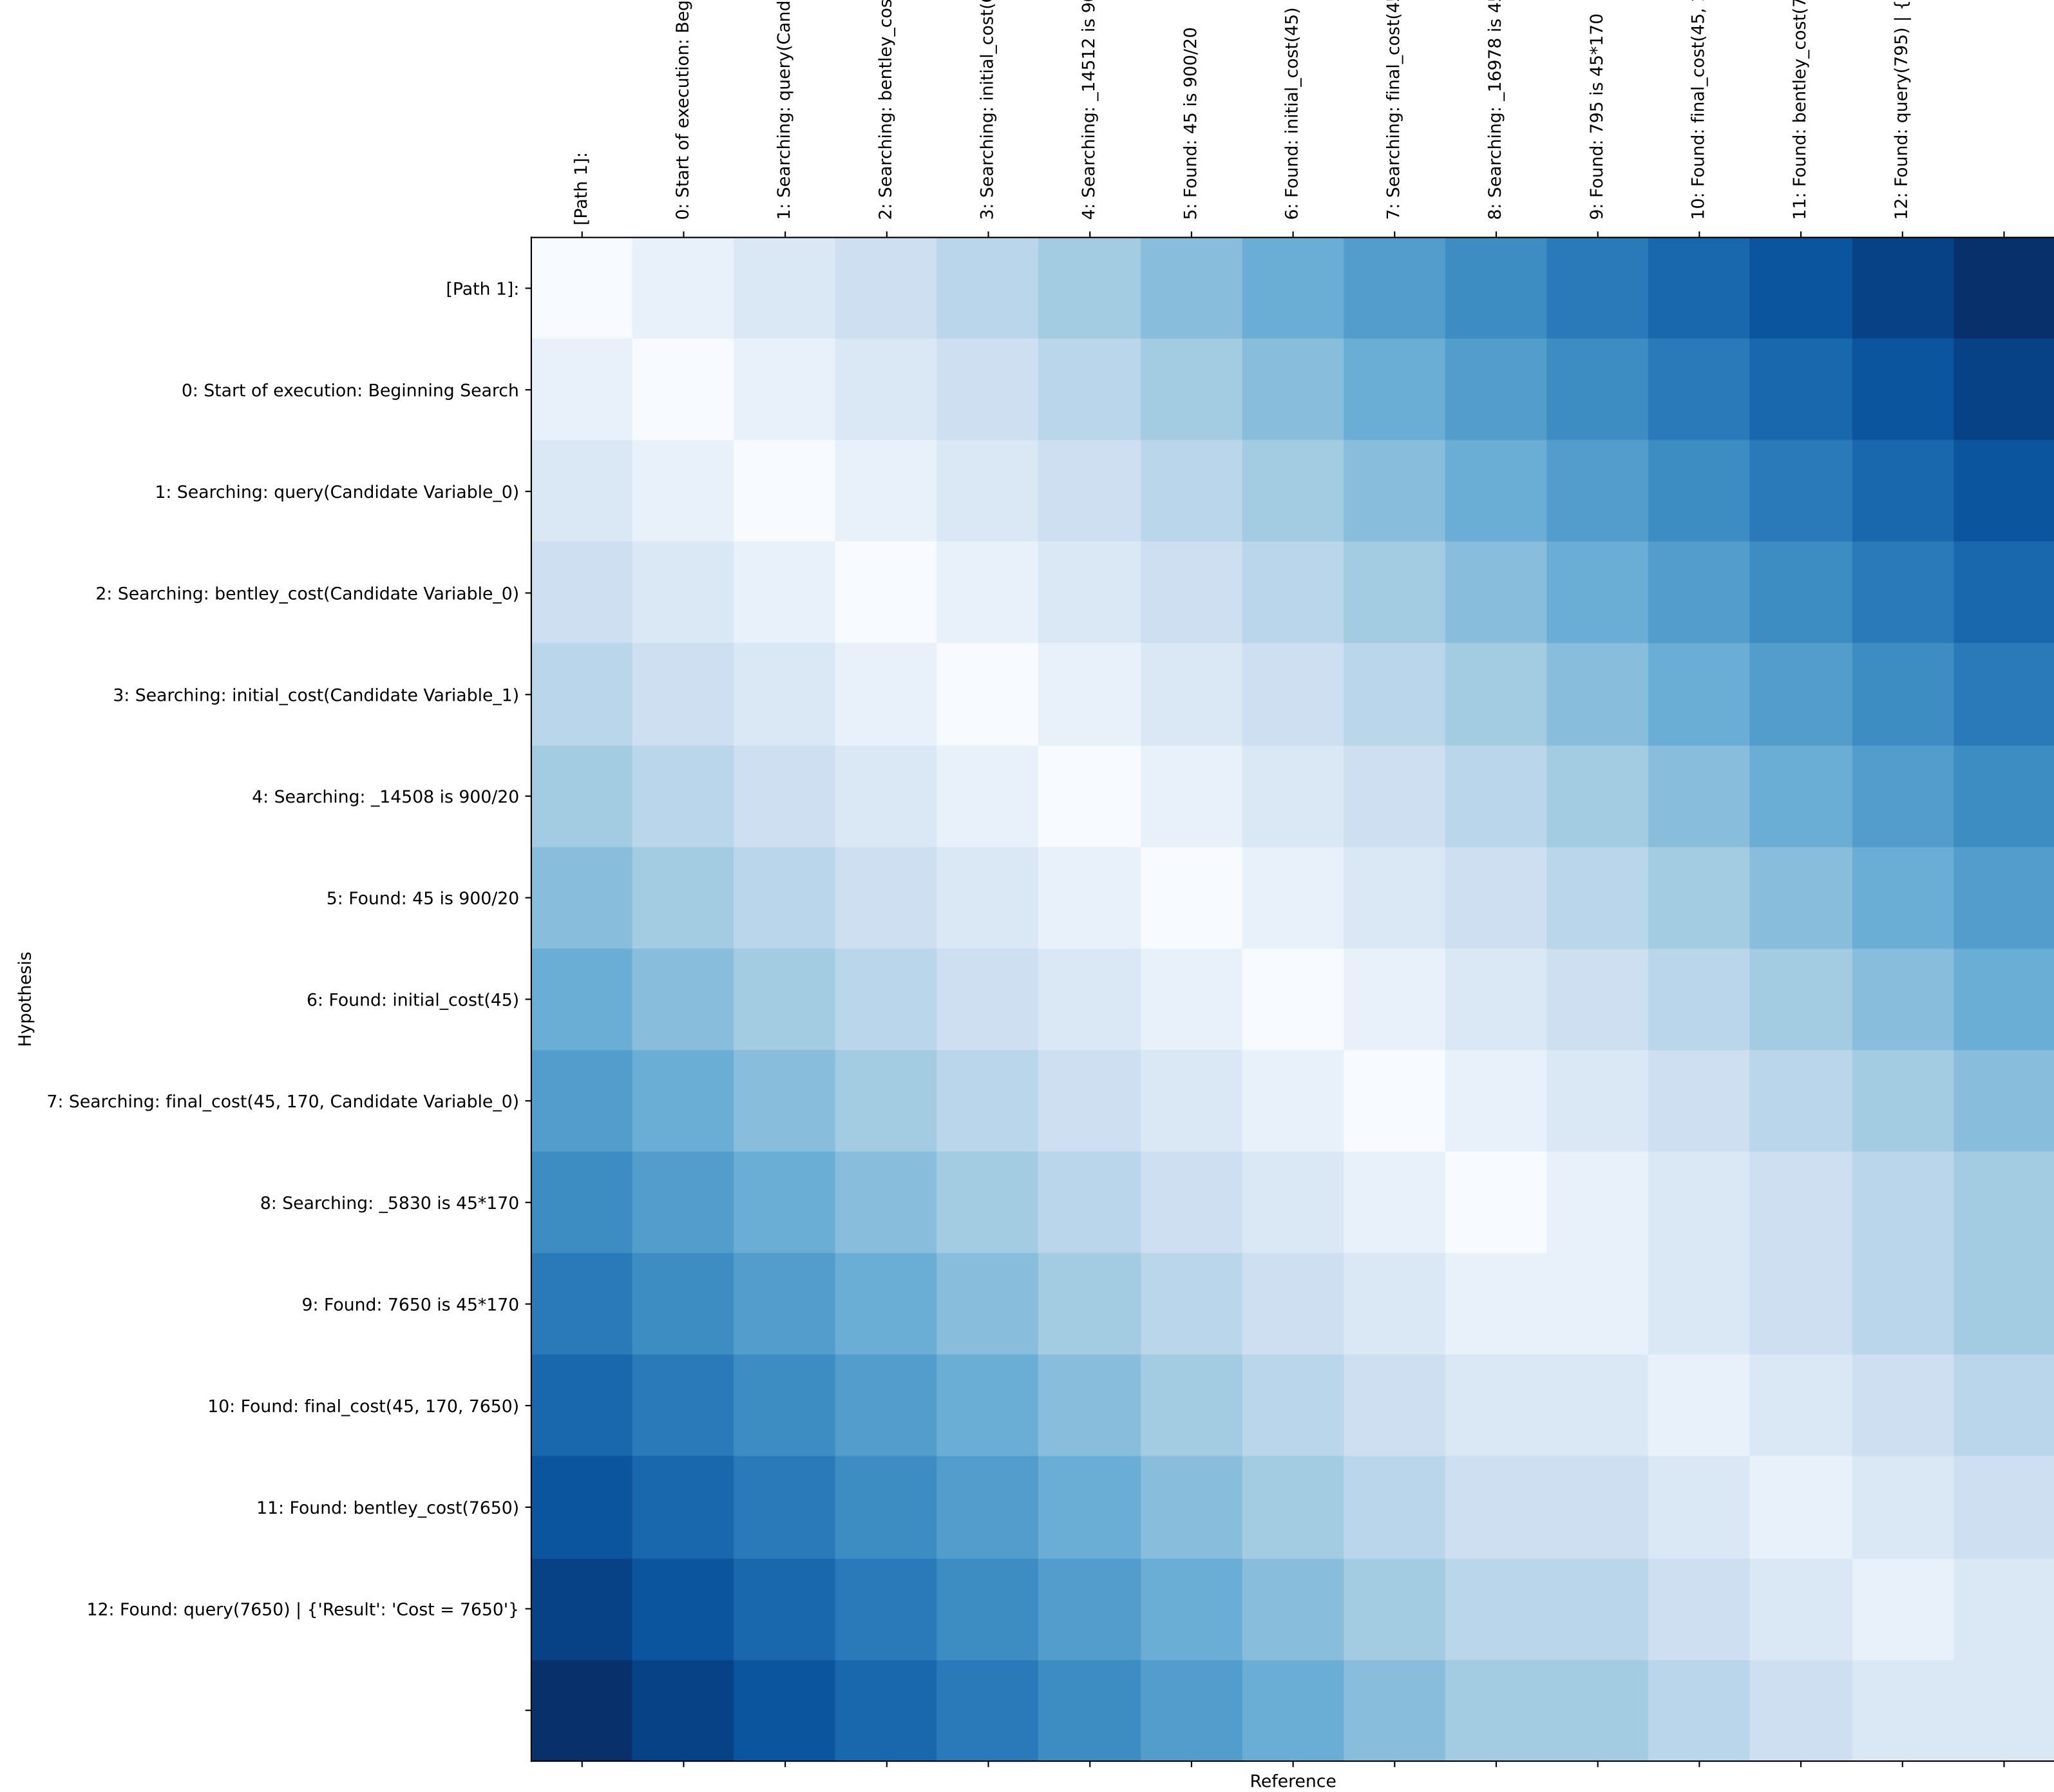

Supplement: supplementary_material [file attachment]

Hypothesis

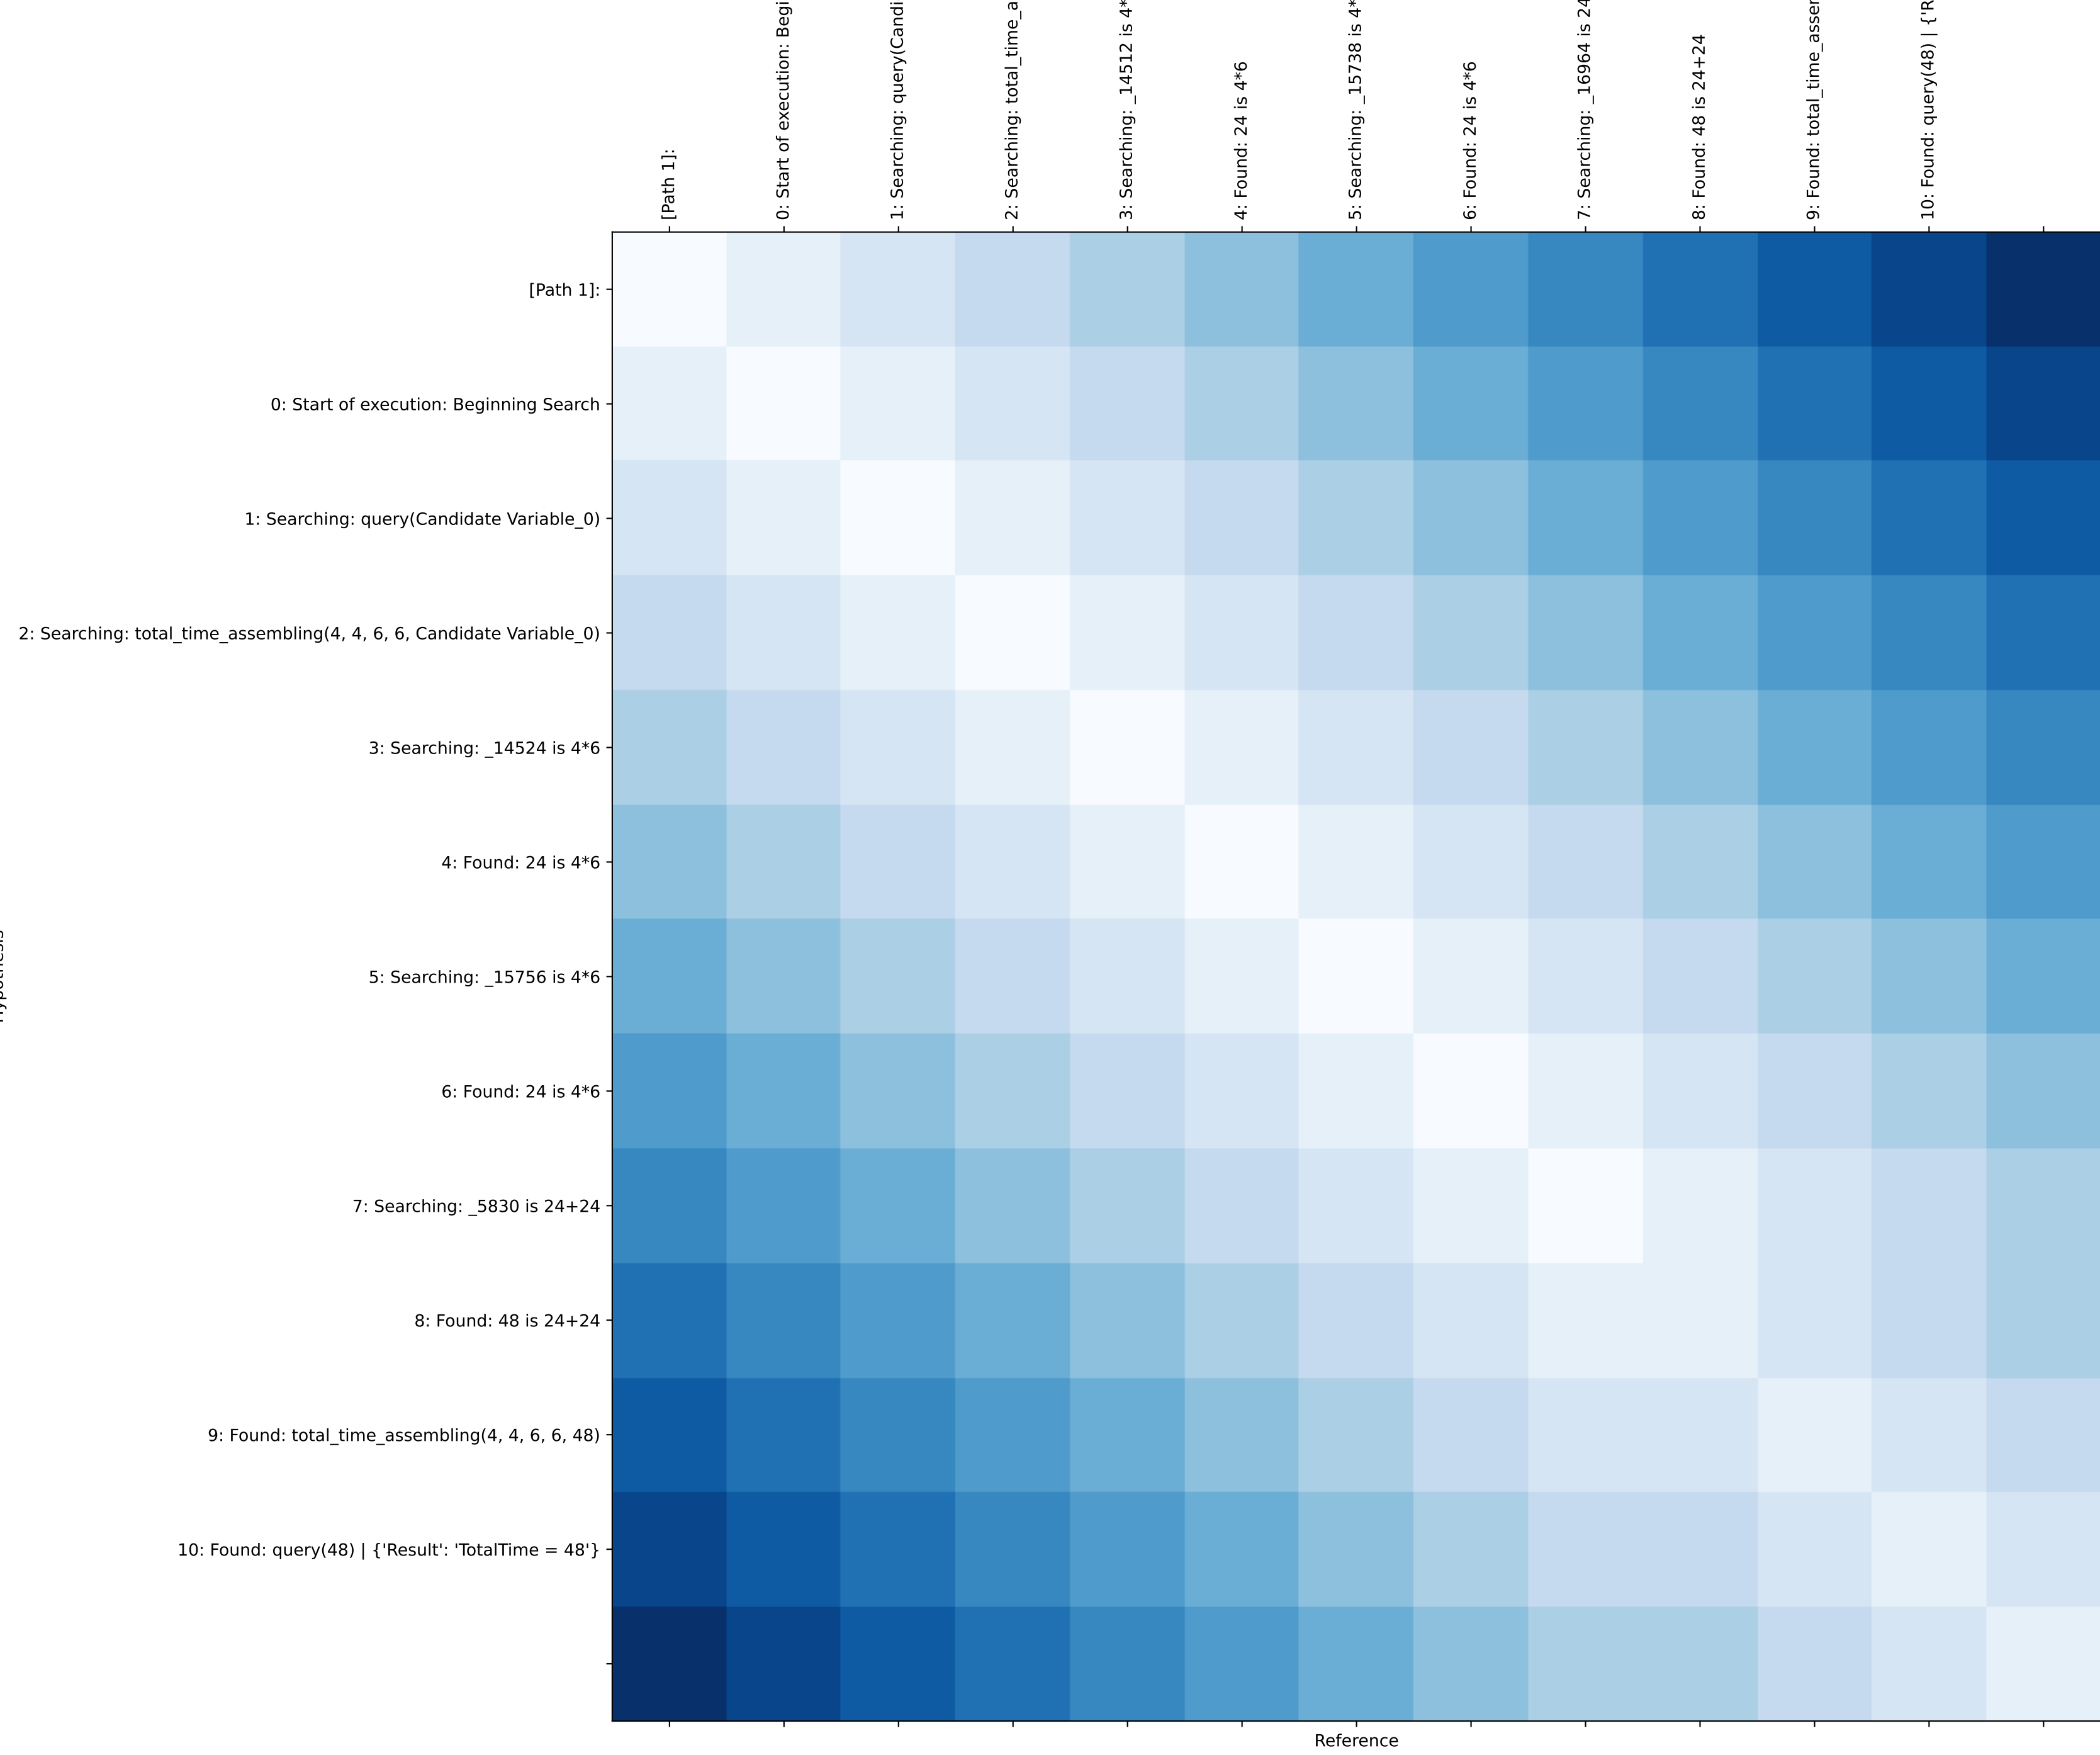

Supplement: supplementary_material [file attachment]

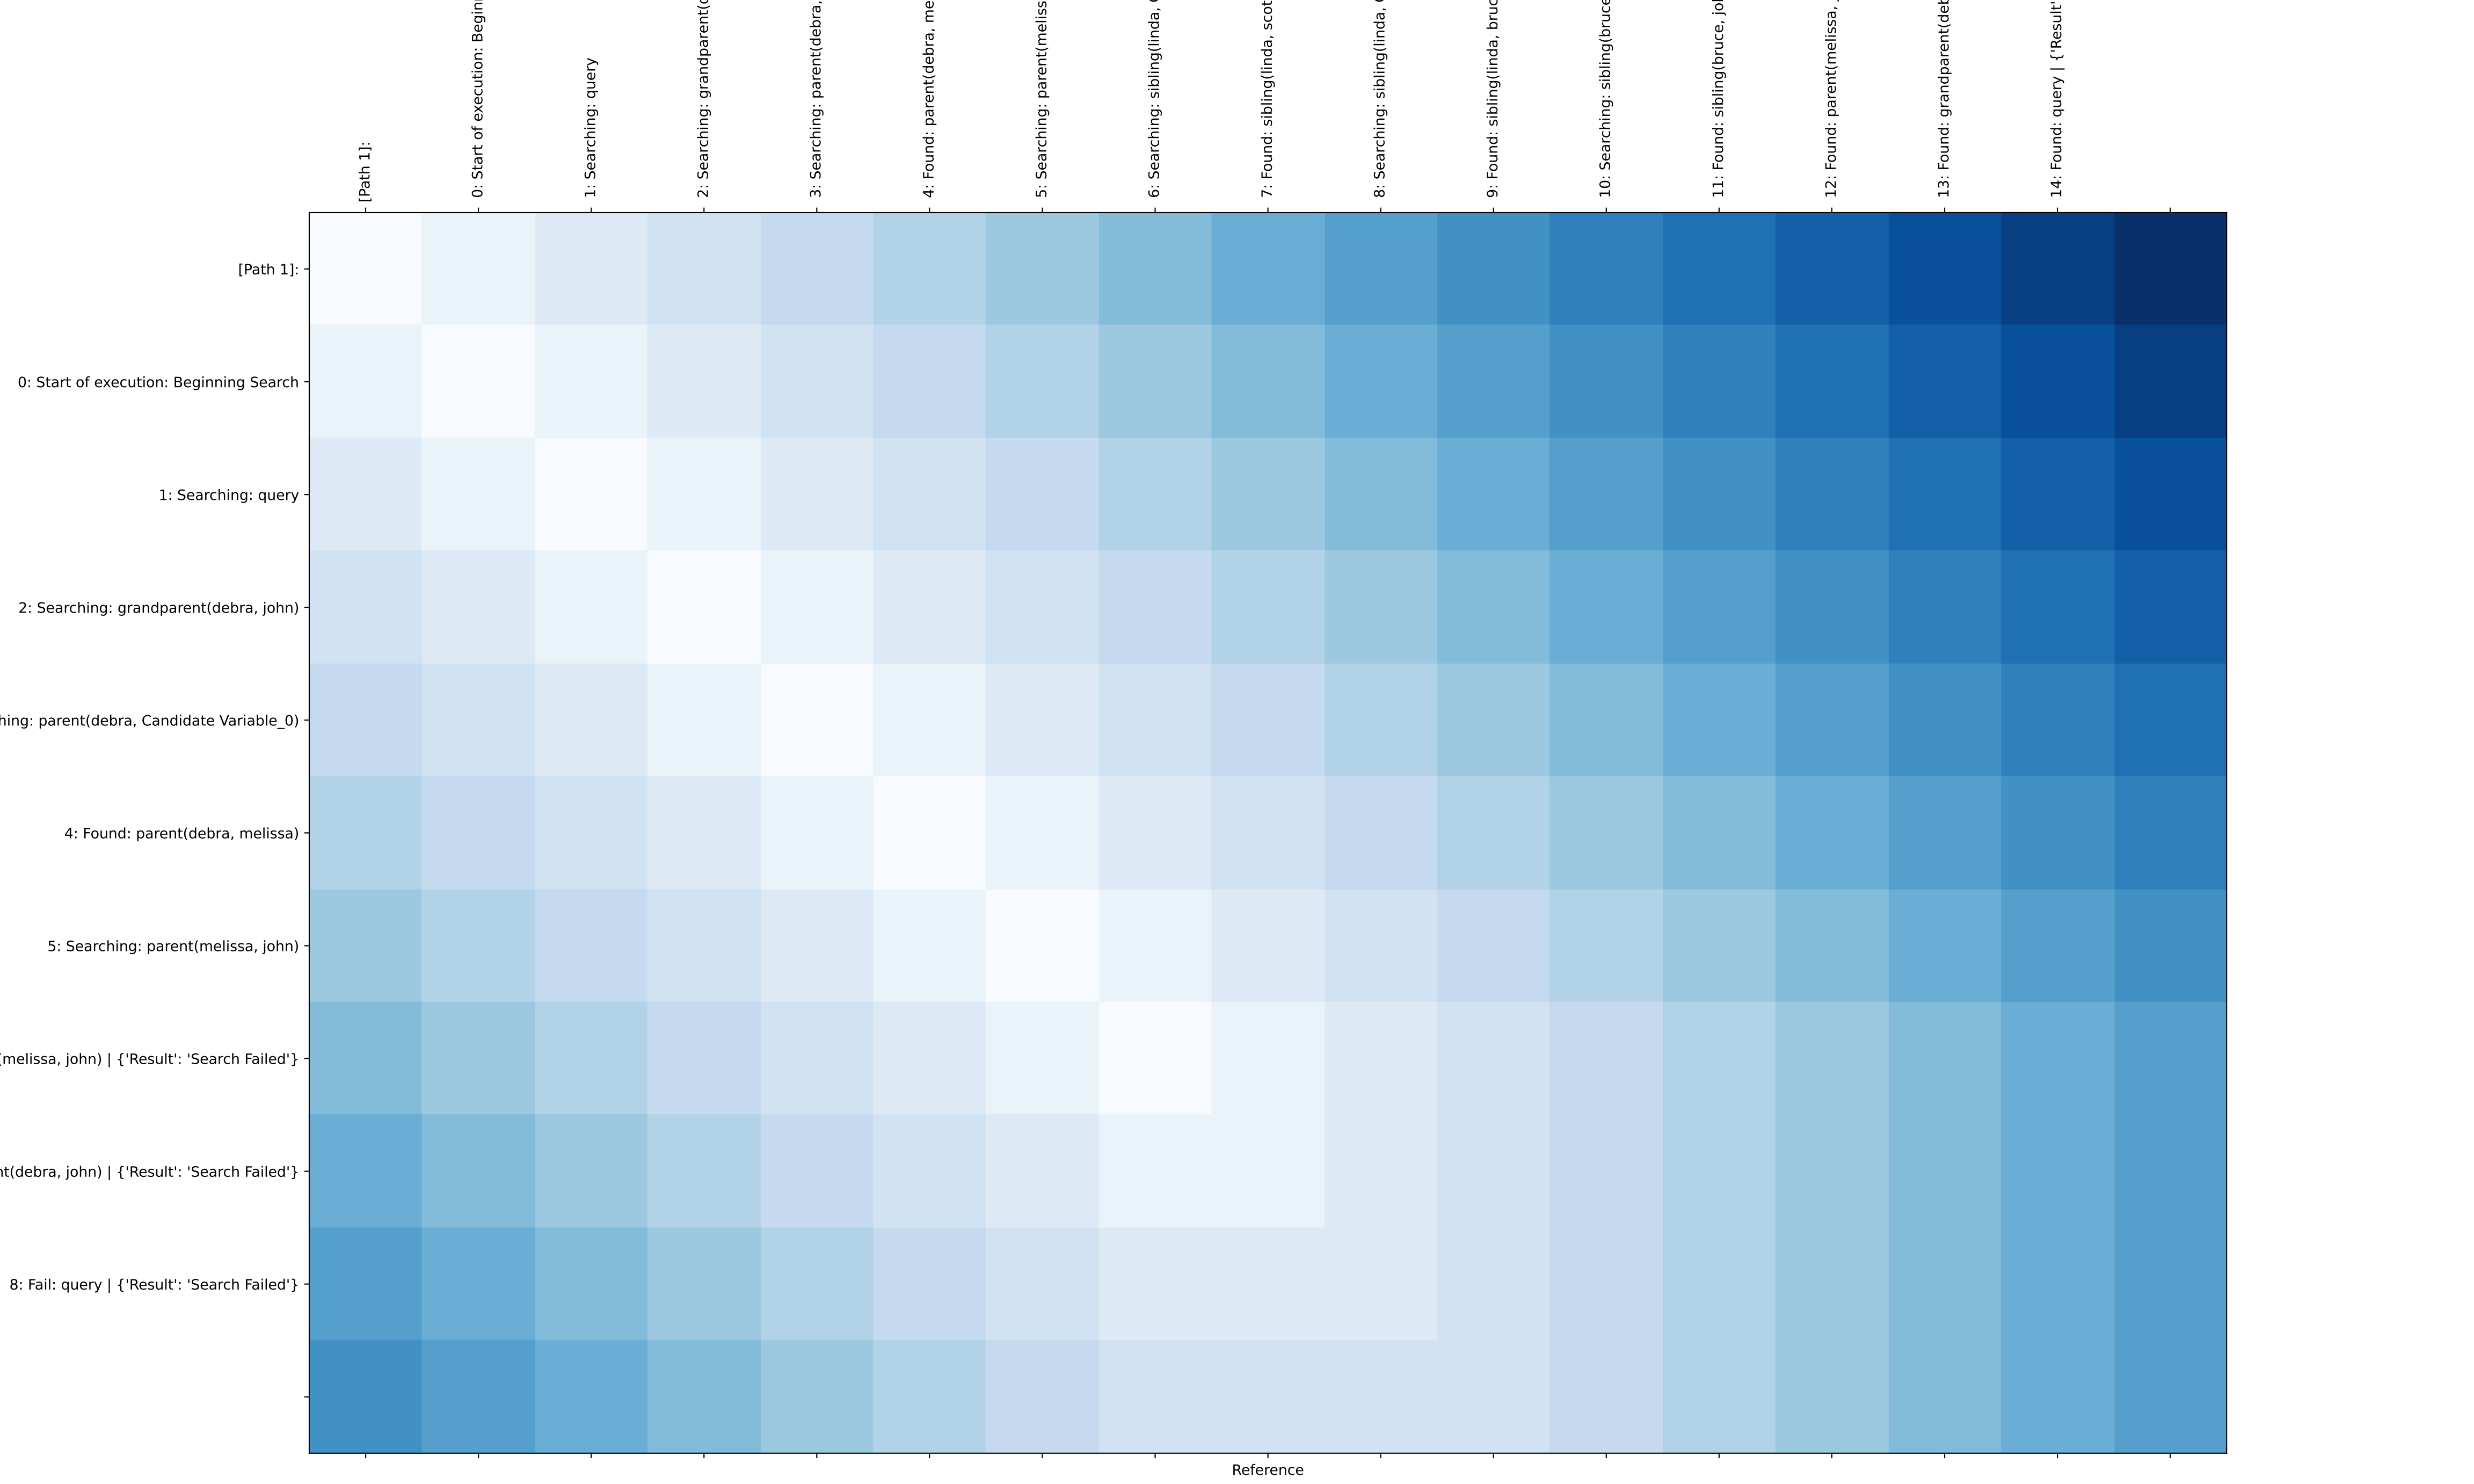

Supplement: supplementary_material [file attachment]

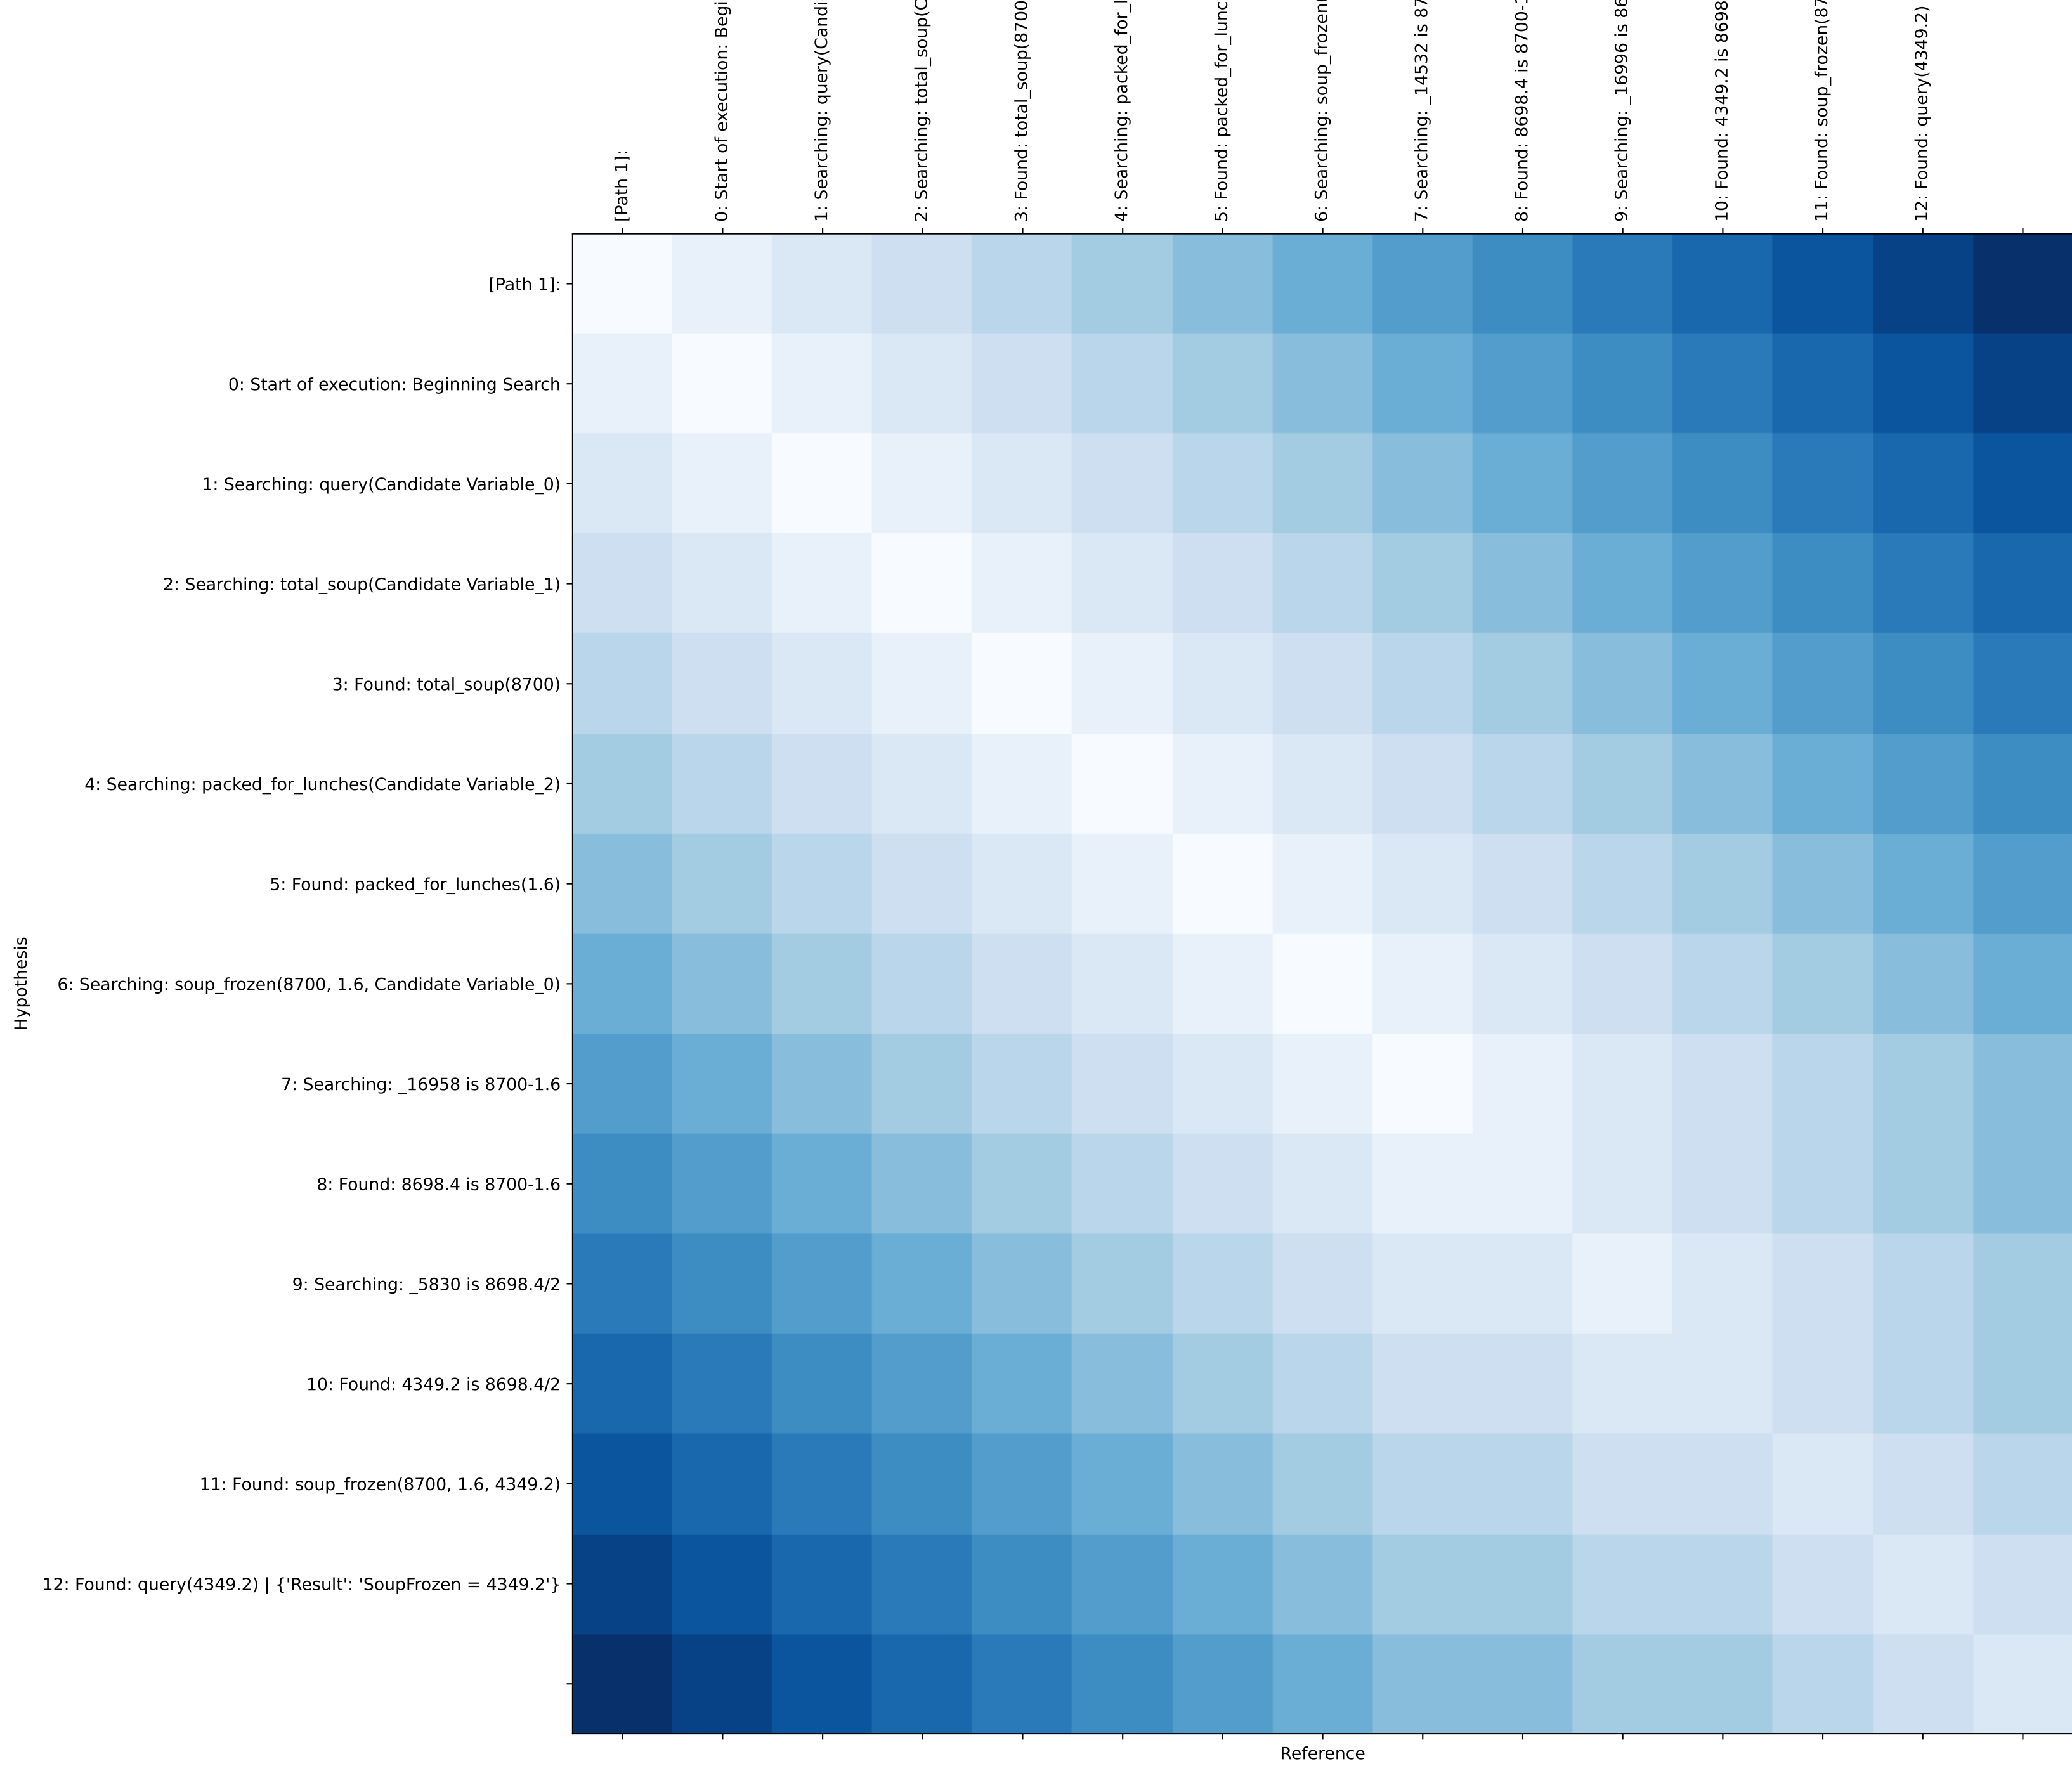

Supplement: supplementary_material [file attachment]

Hypothesis

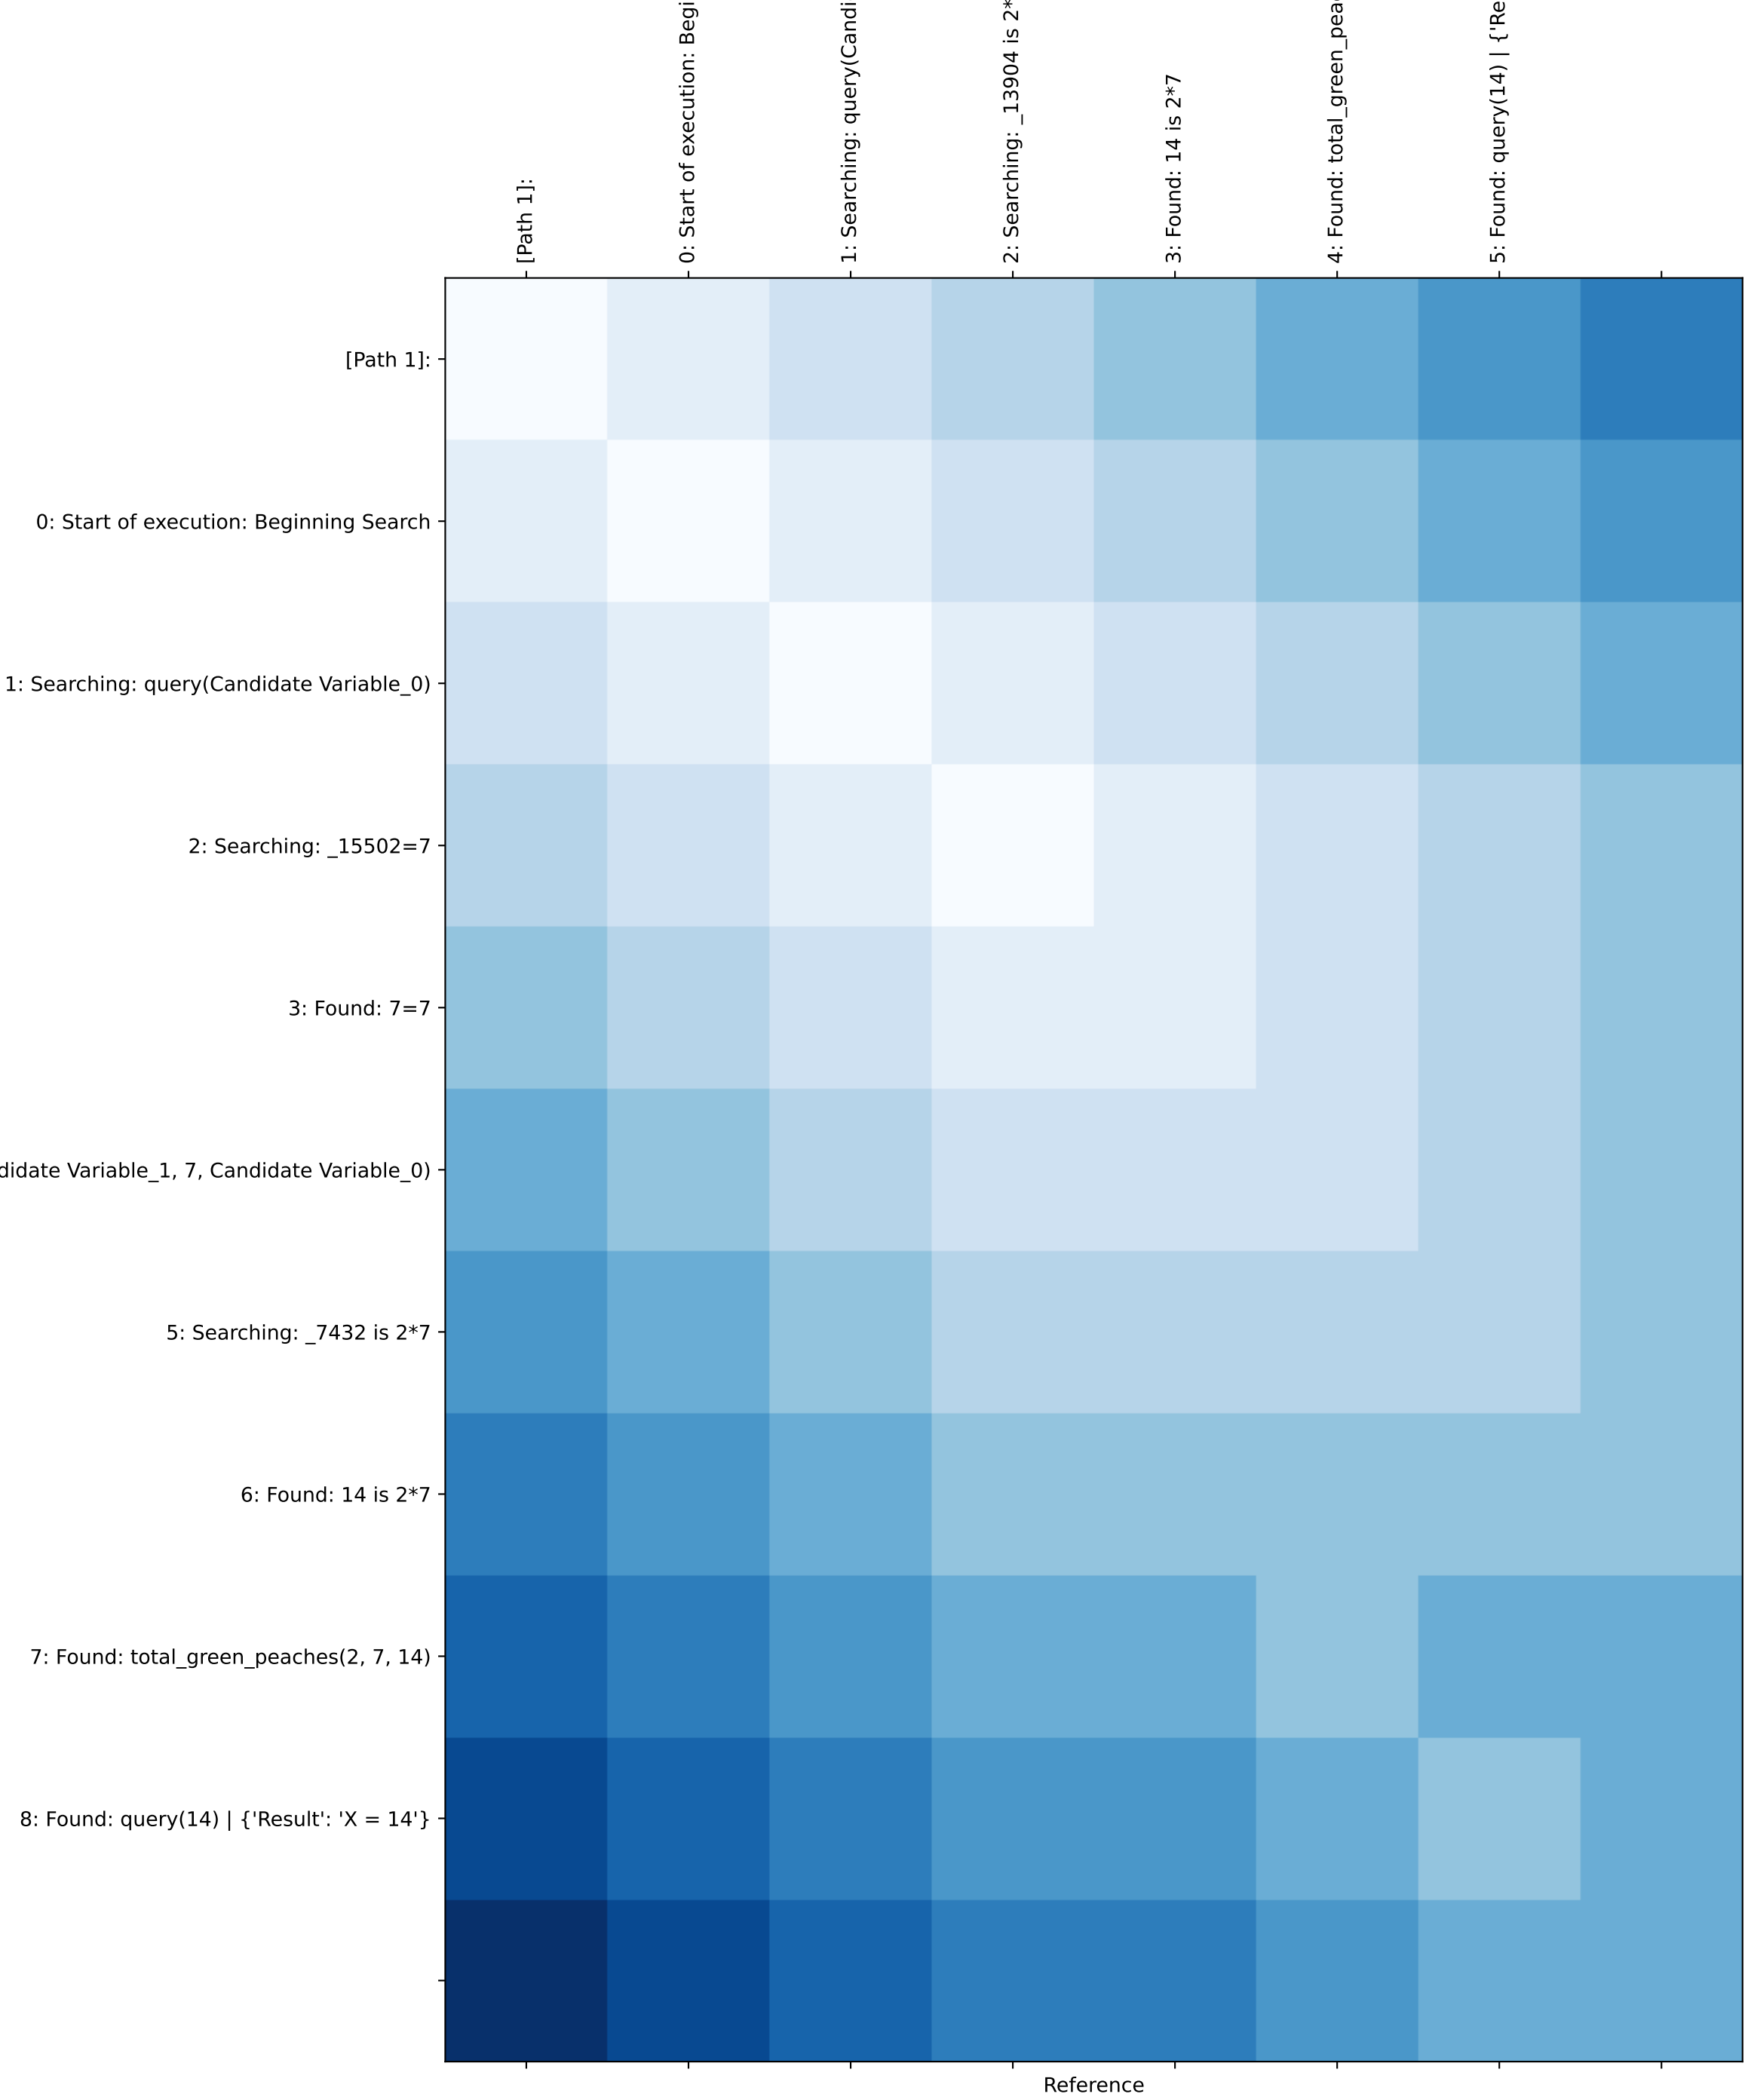

Supplement: supplementary_material [file attachment]

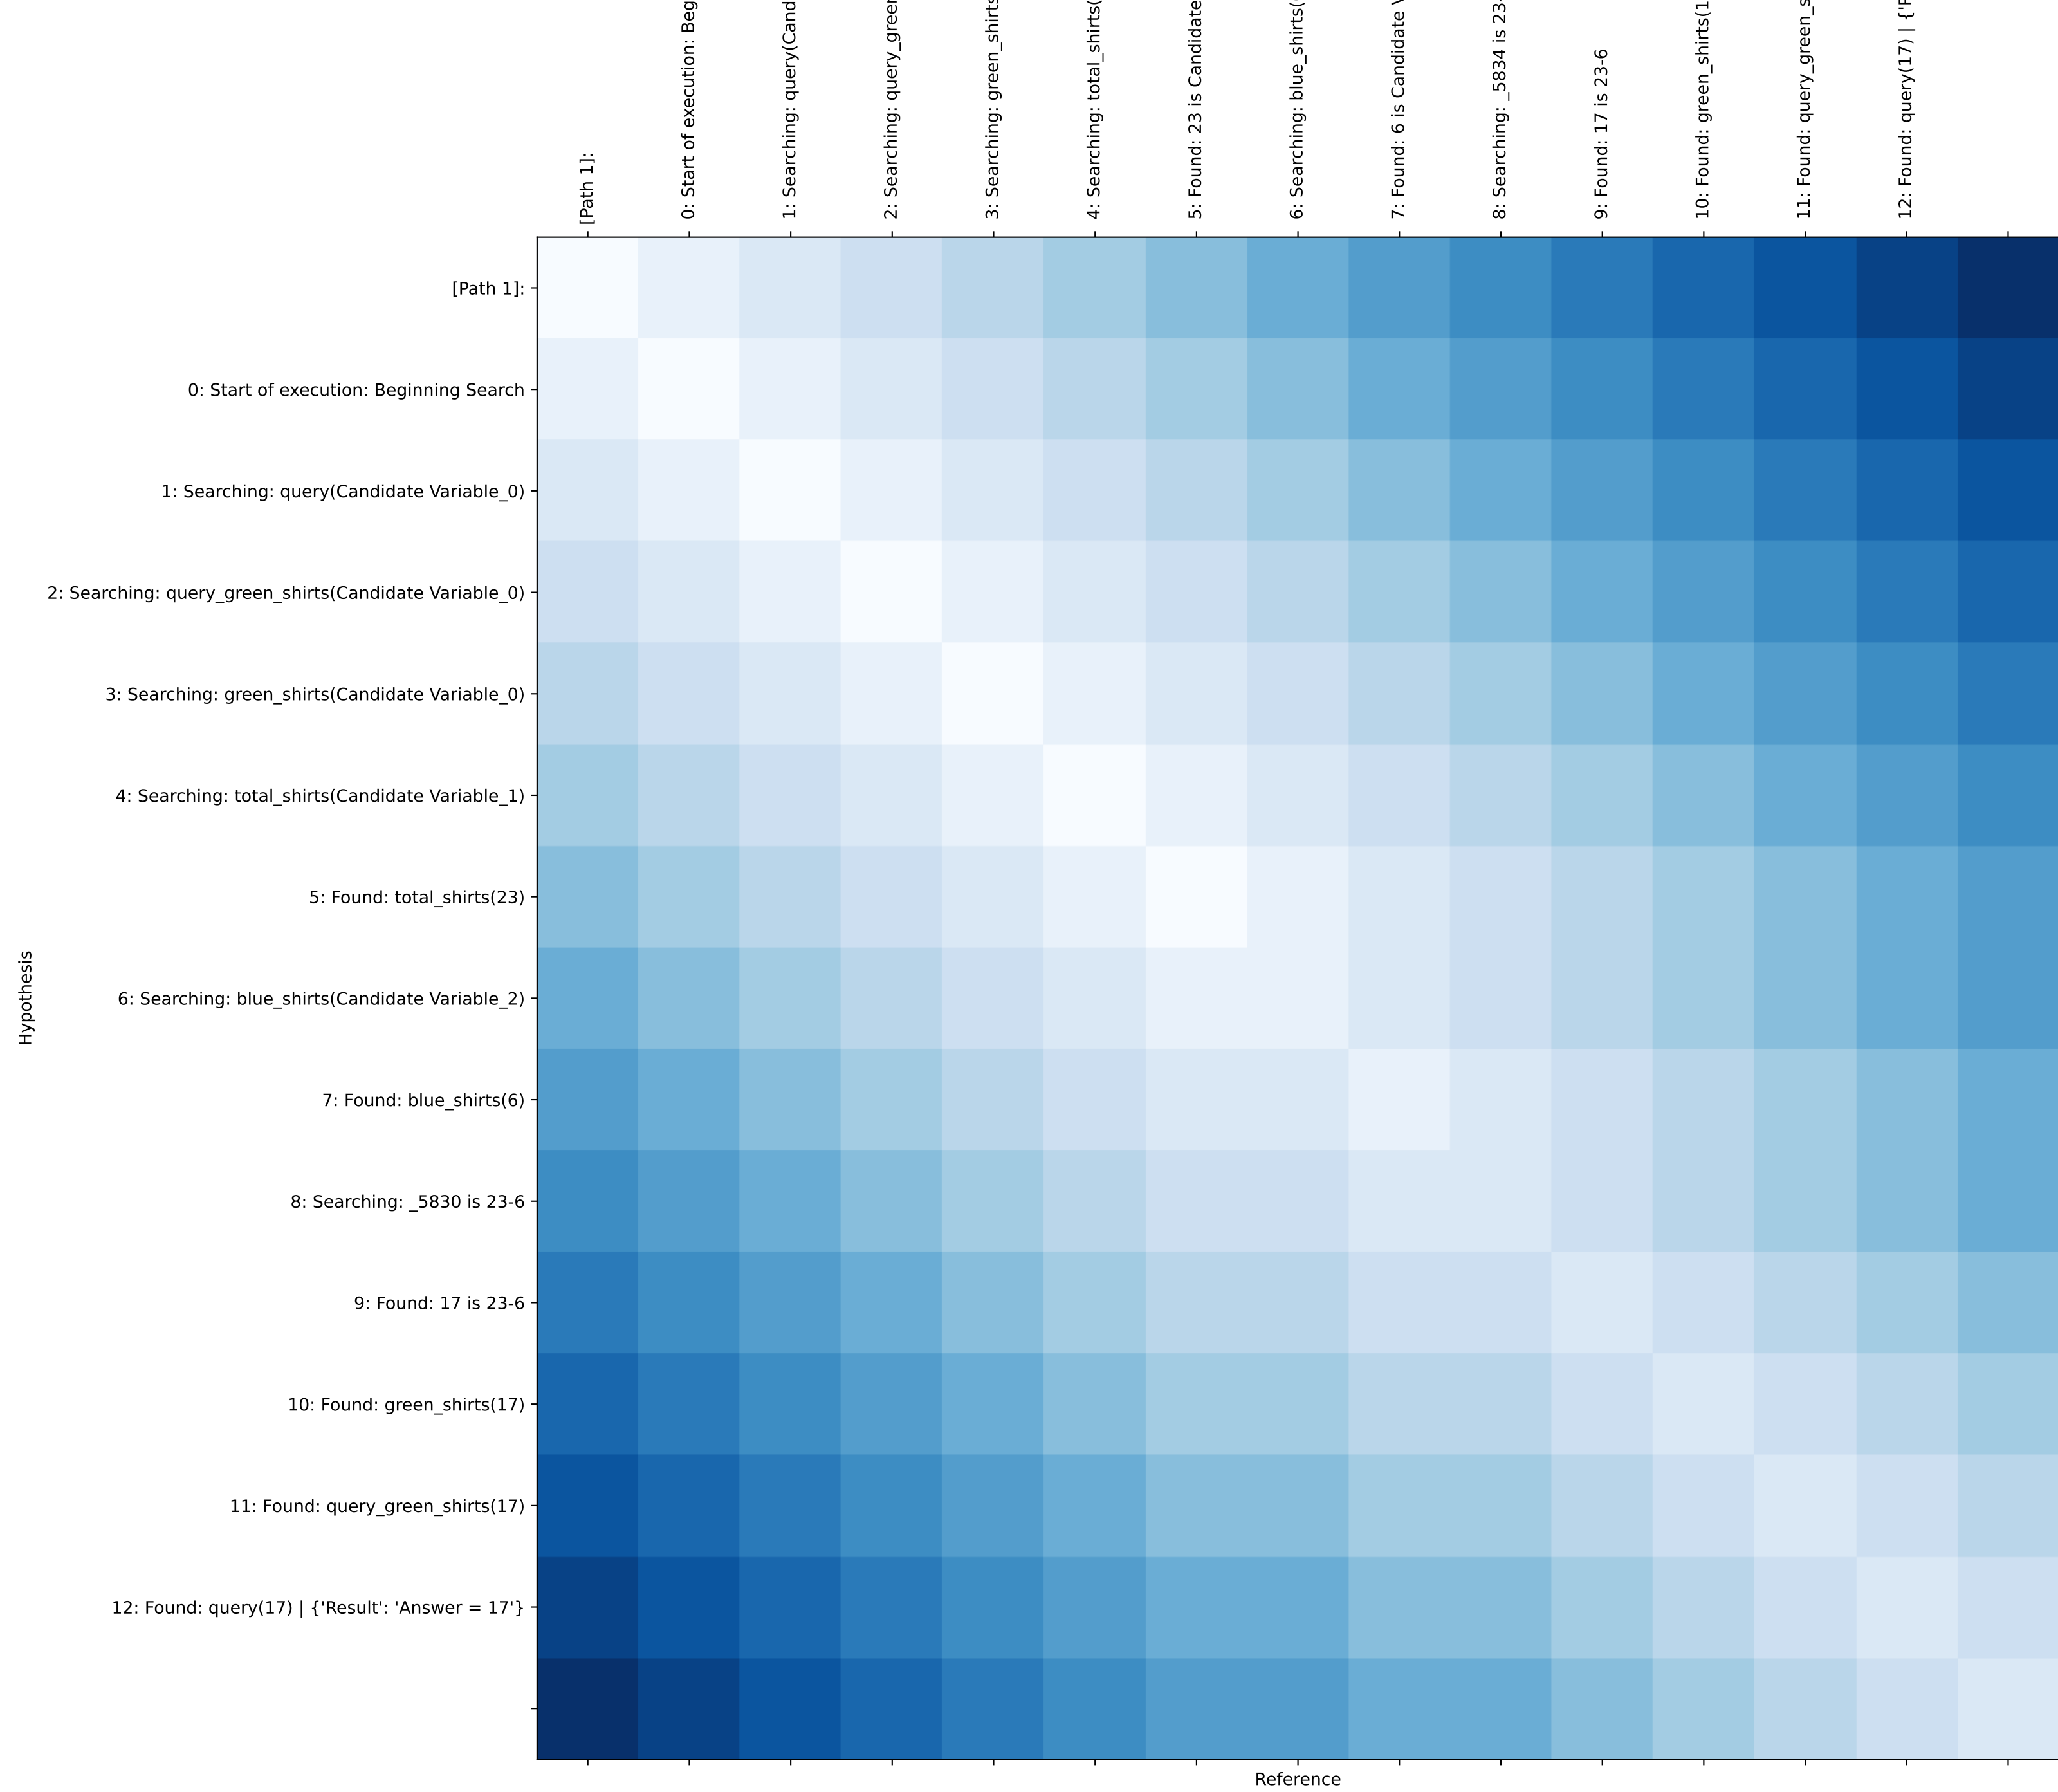

Supplement: supplementary_material [file attachment]

Hypothesis

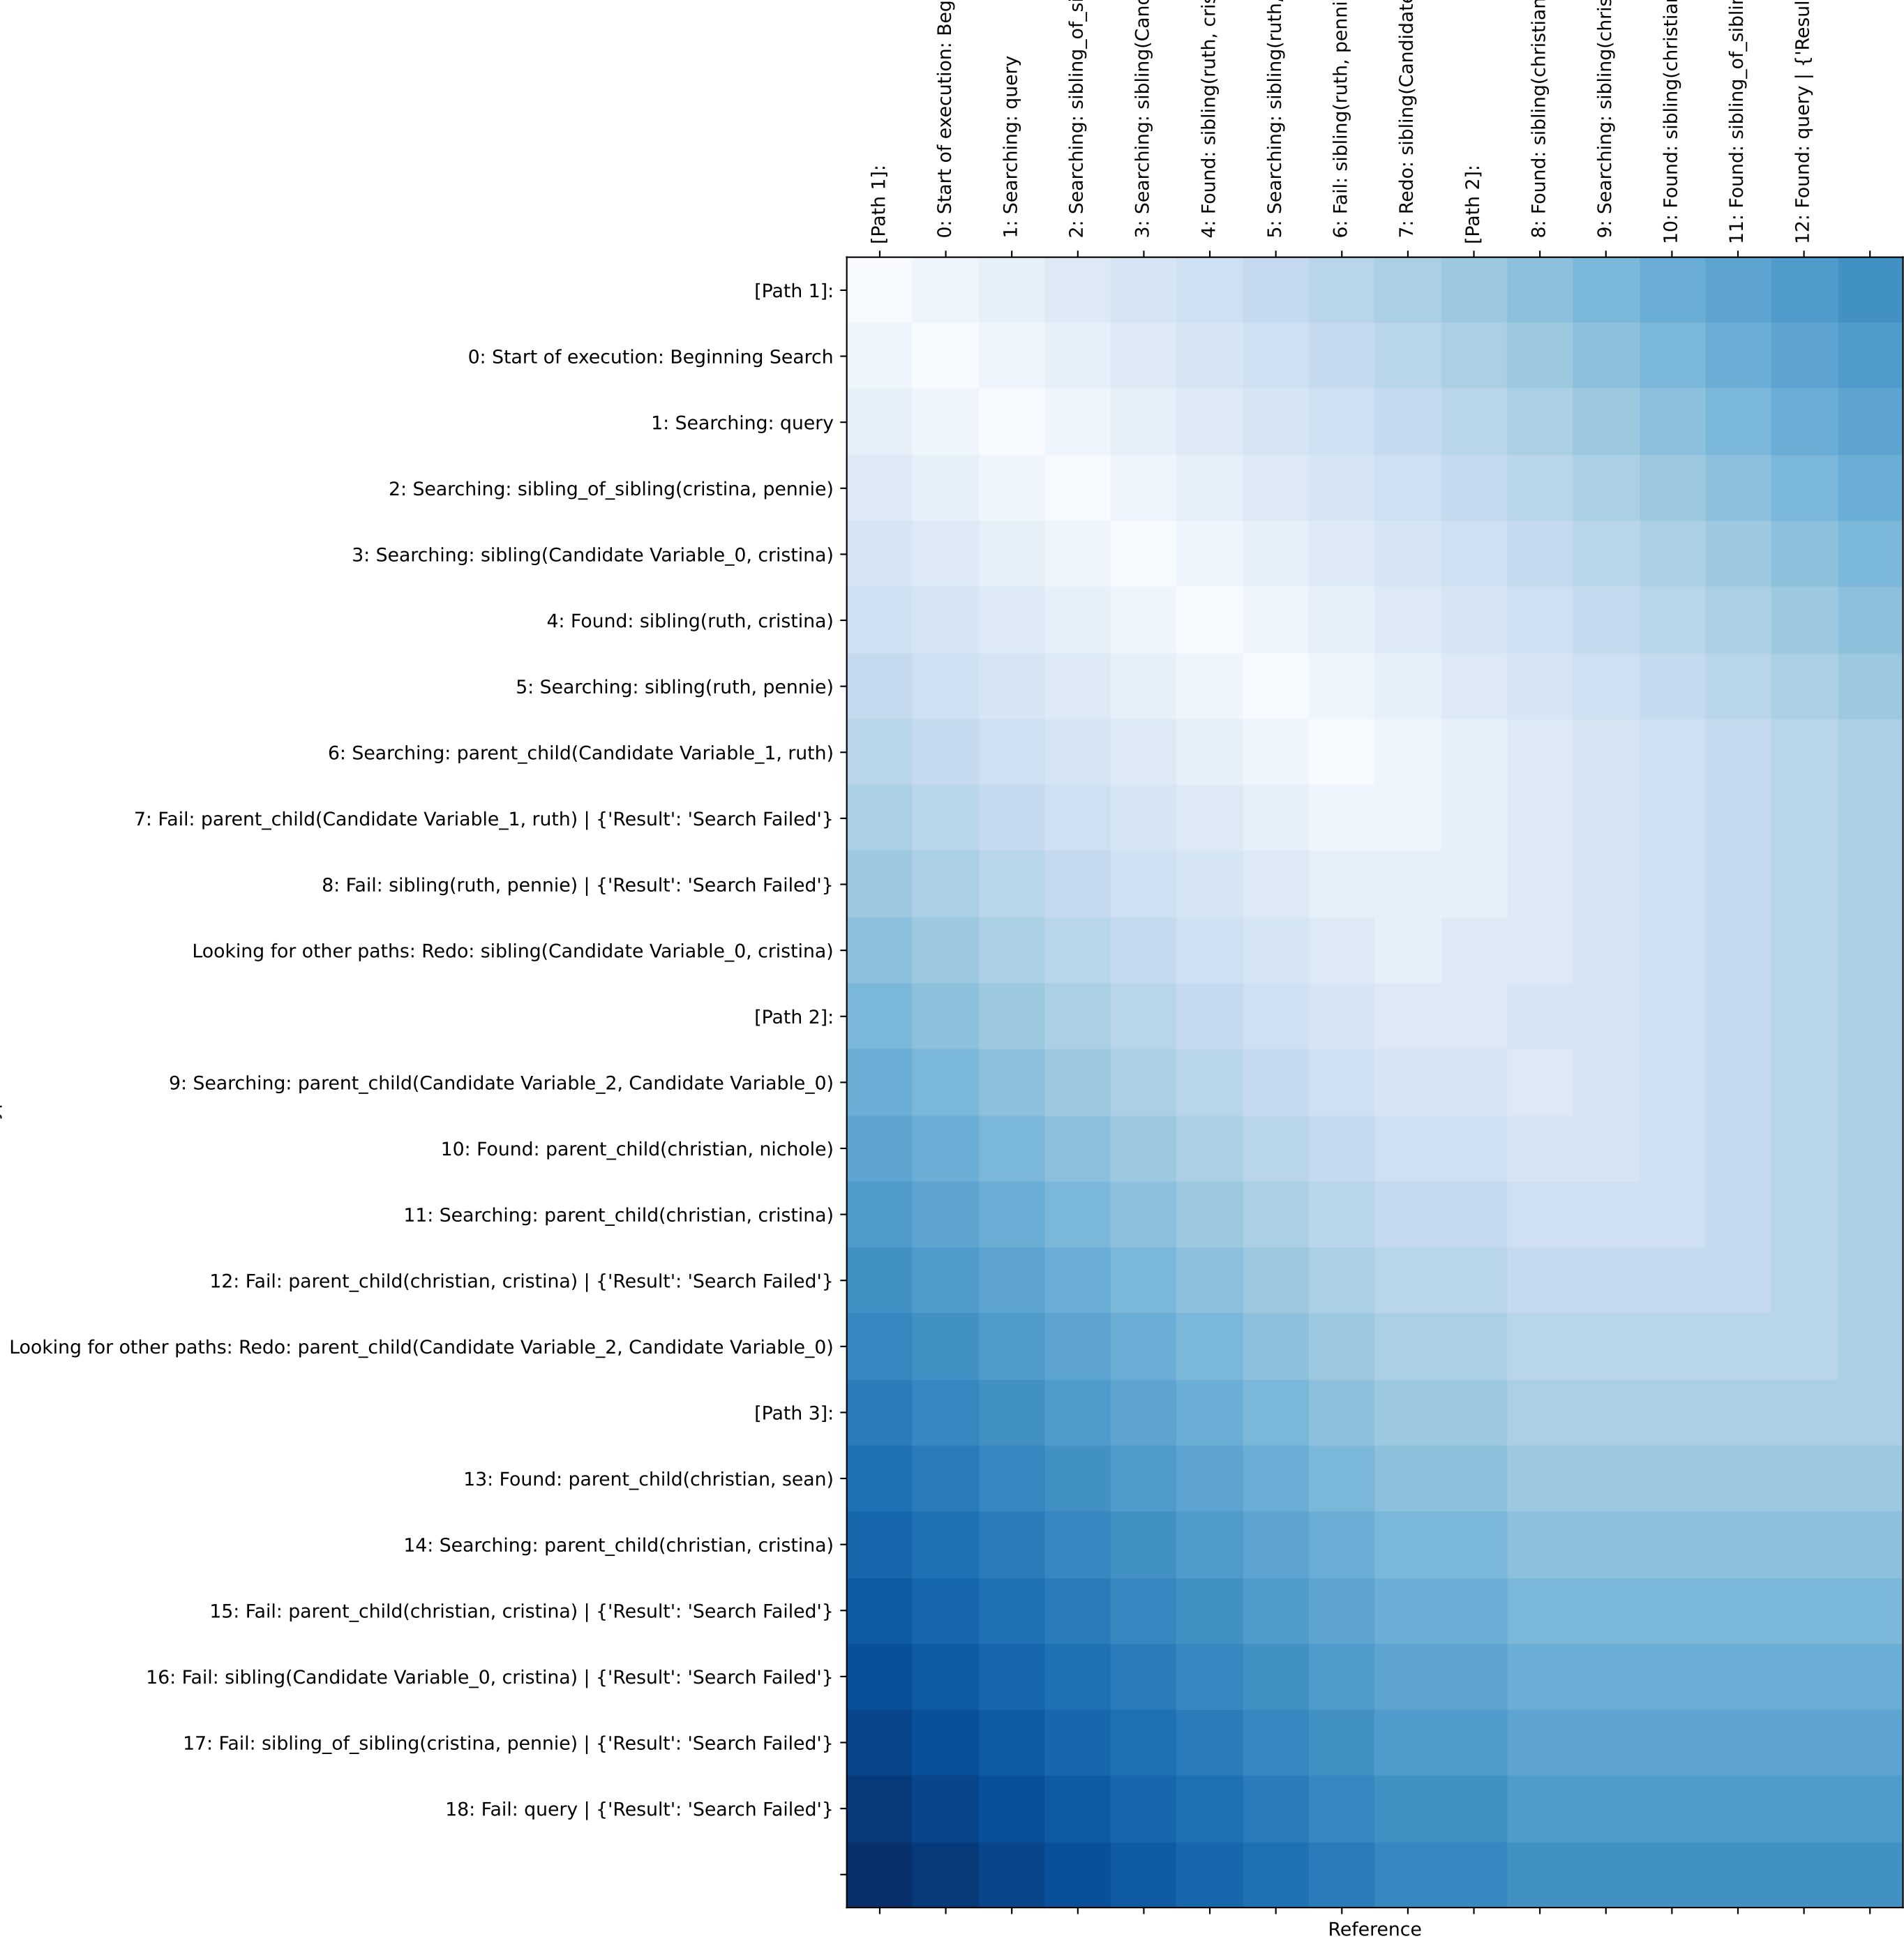

Supplement: supplementary_material [file attachment]

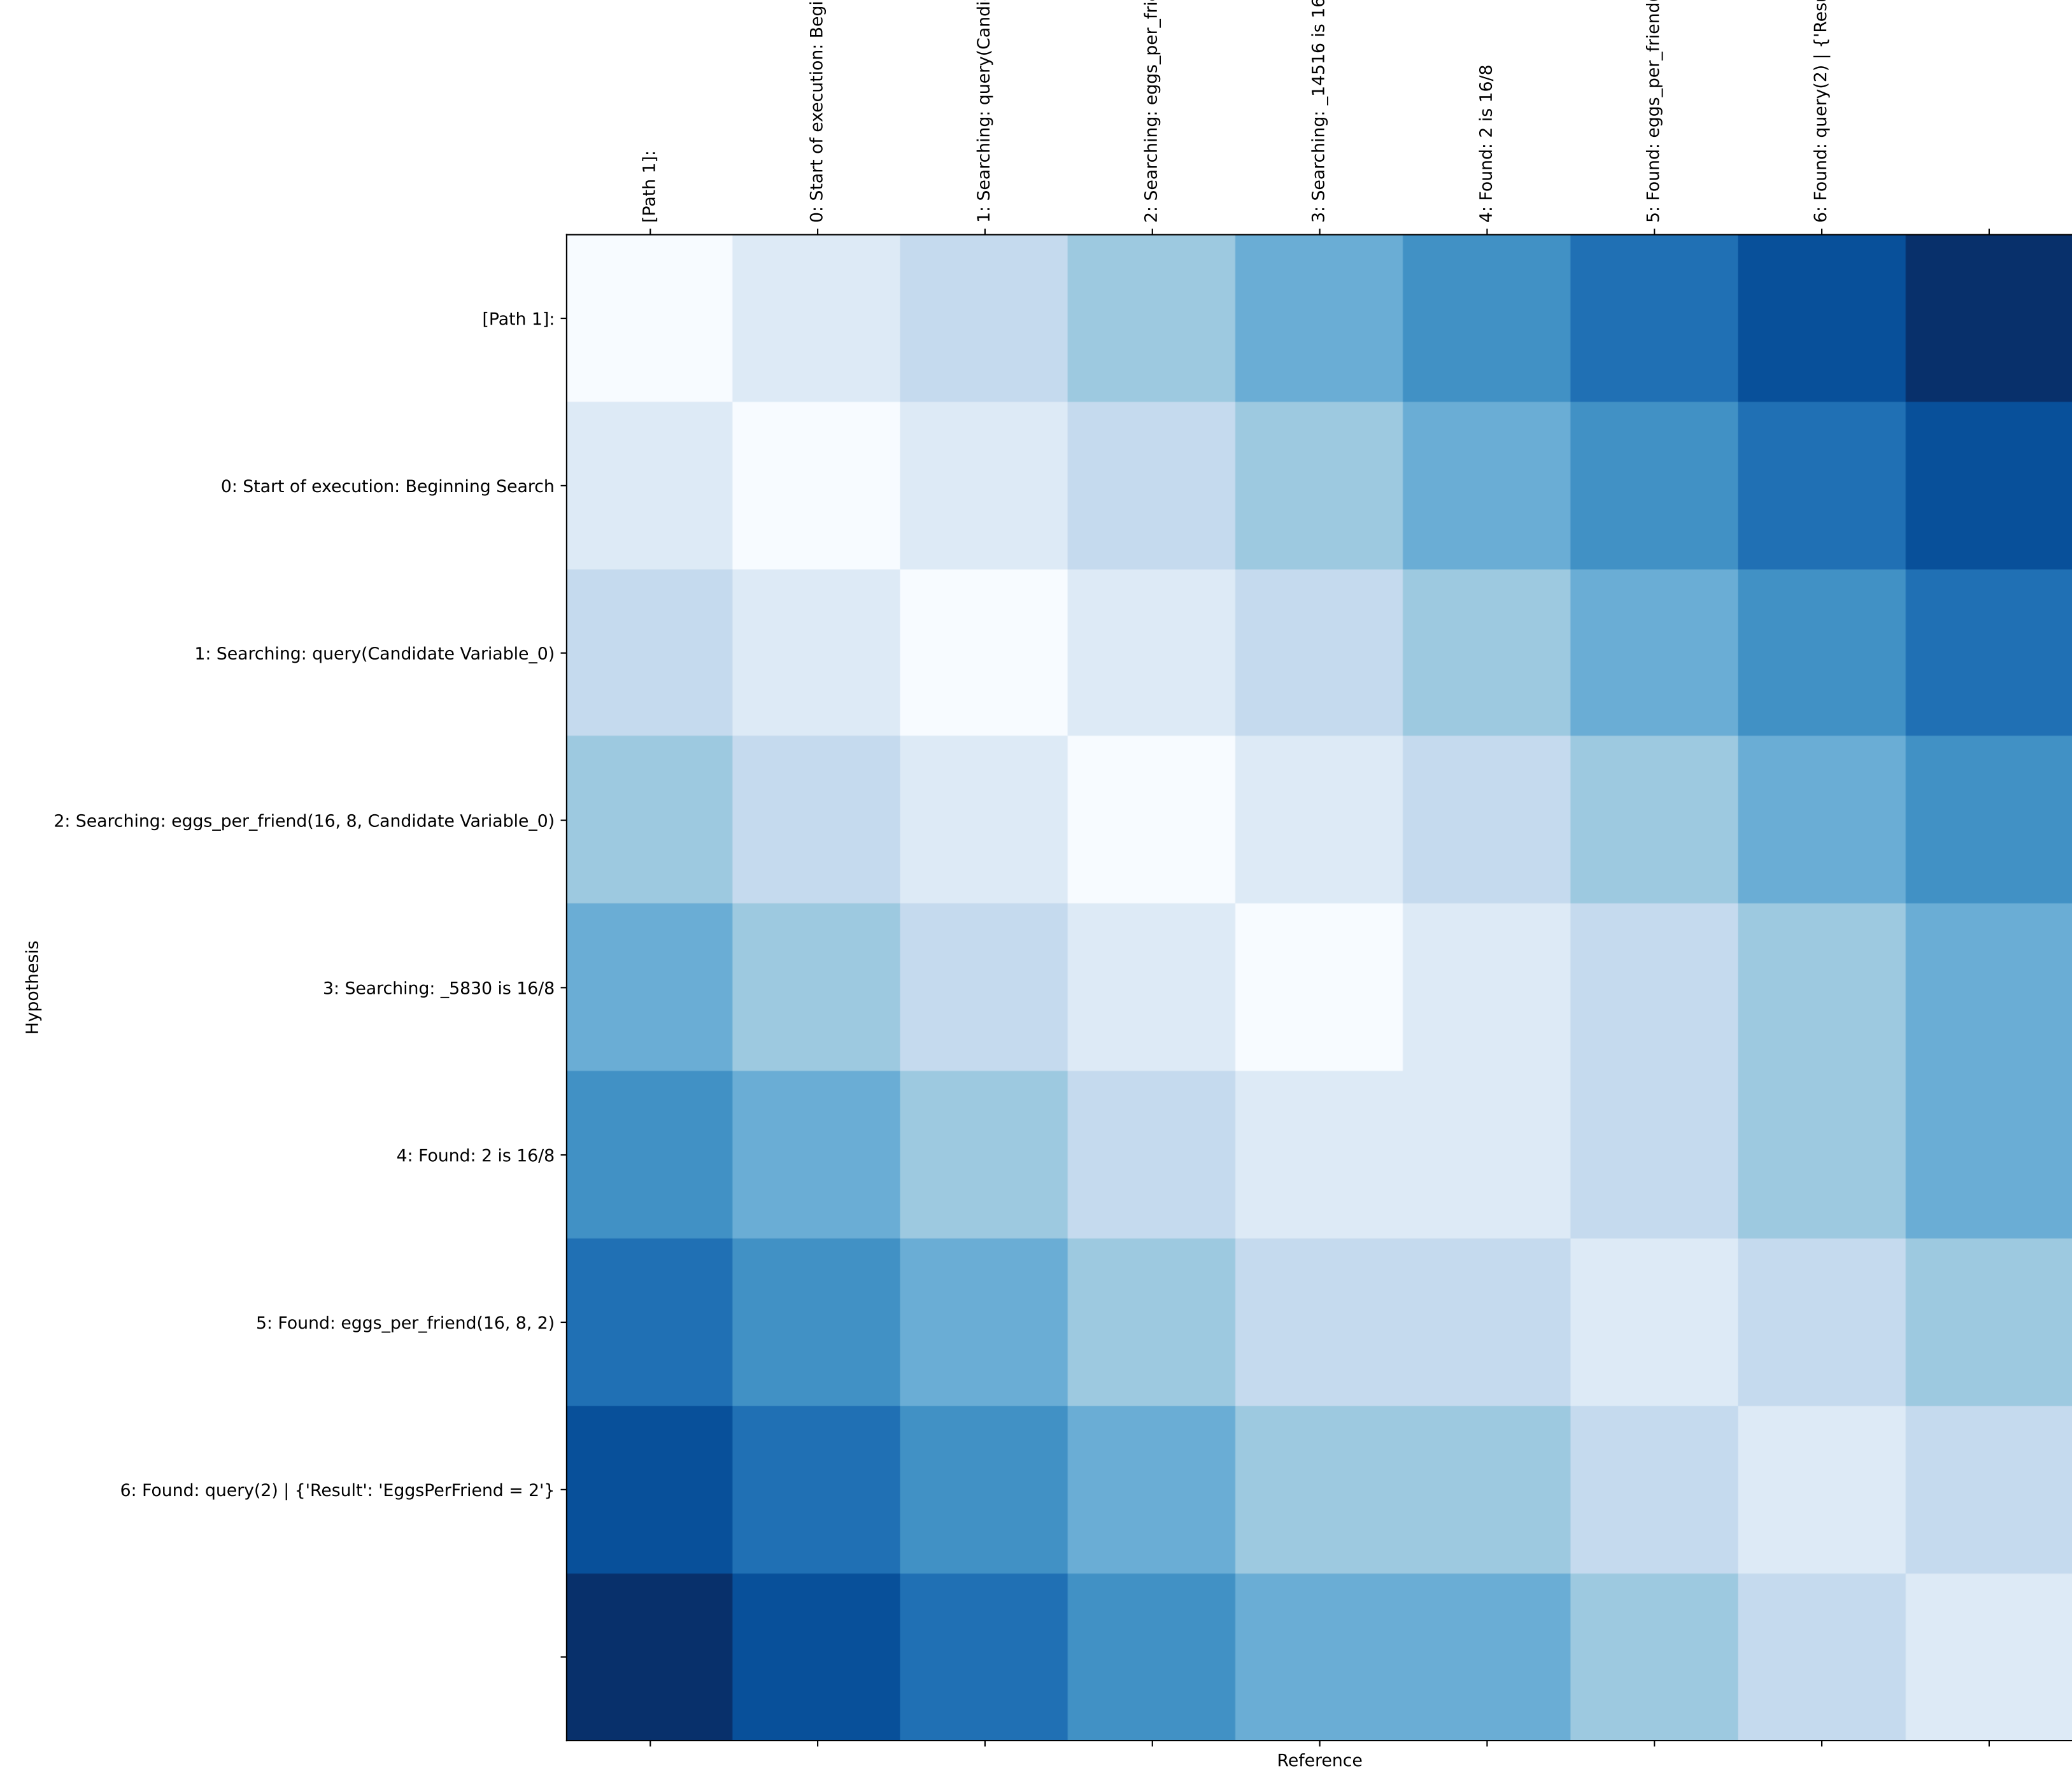

Supplement: supplementary_material [file attachment]

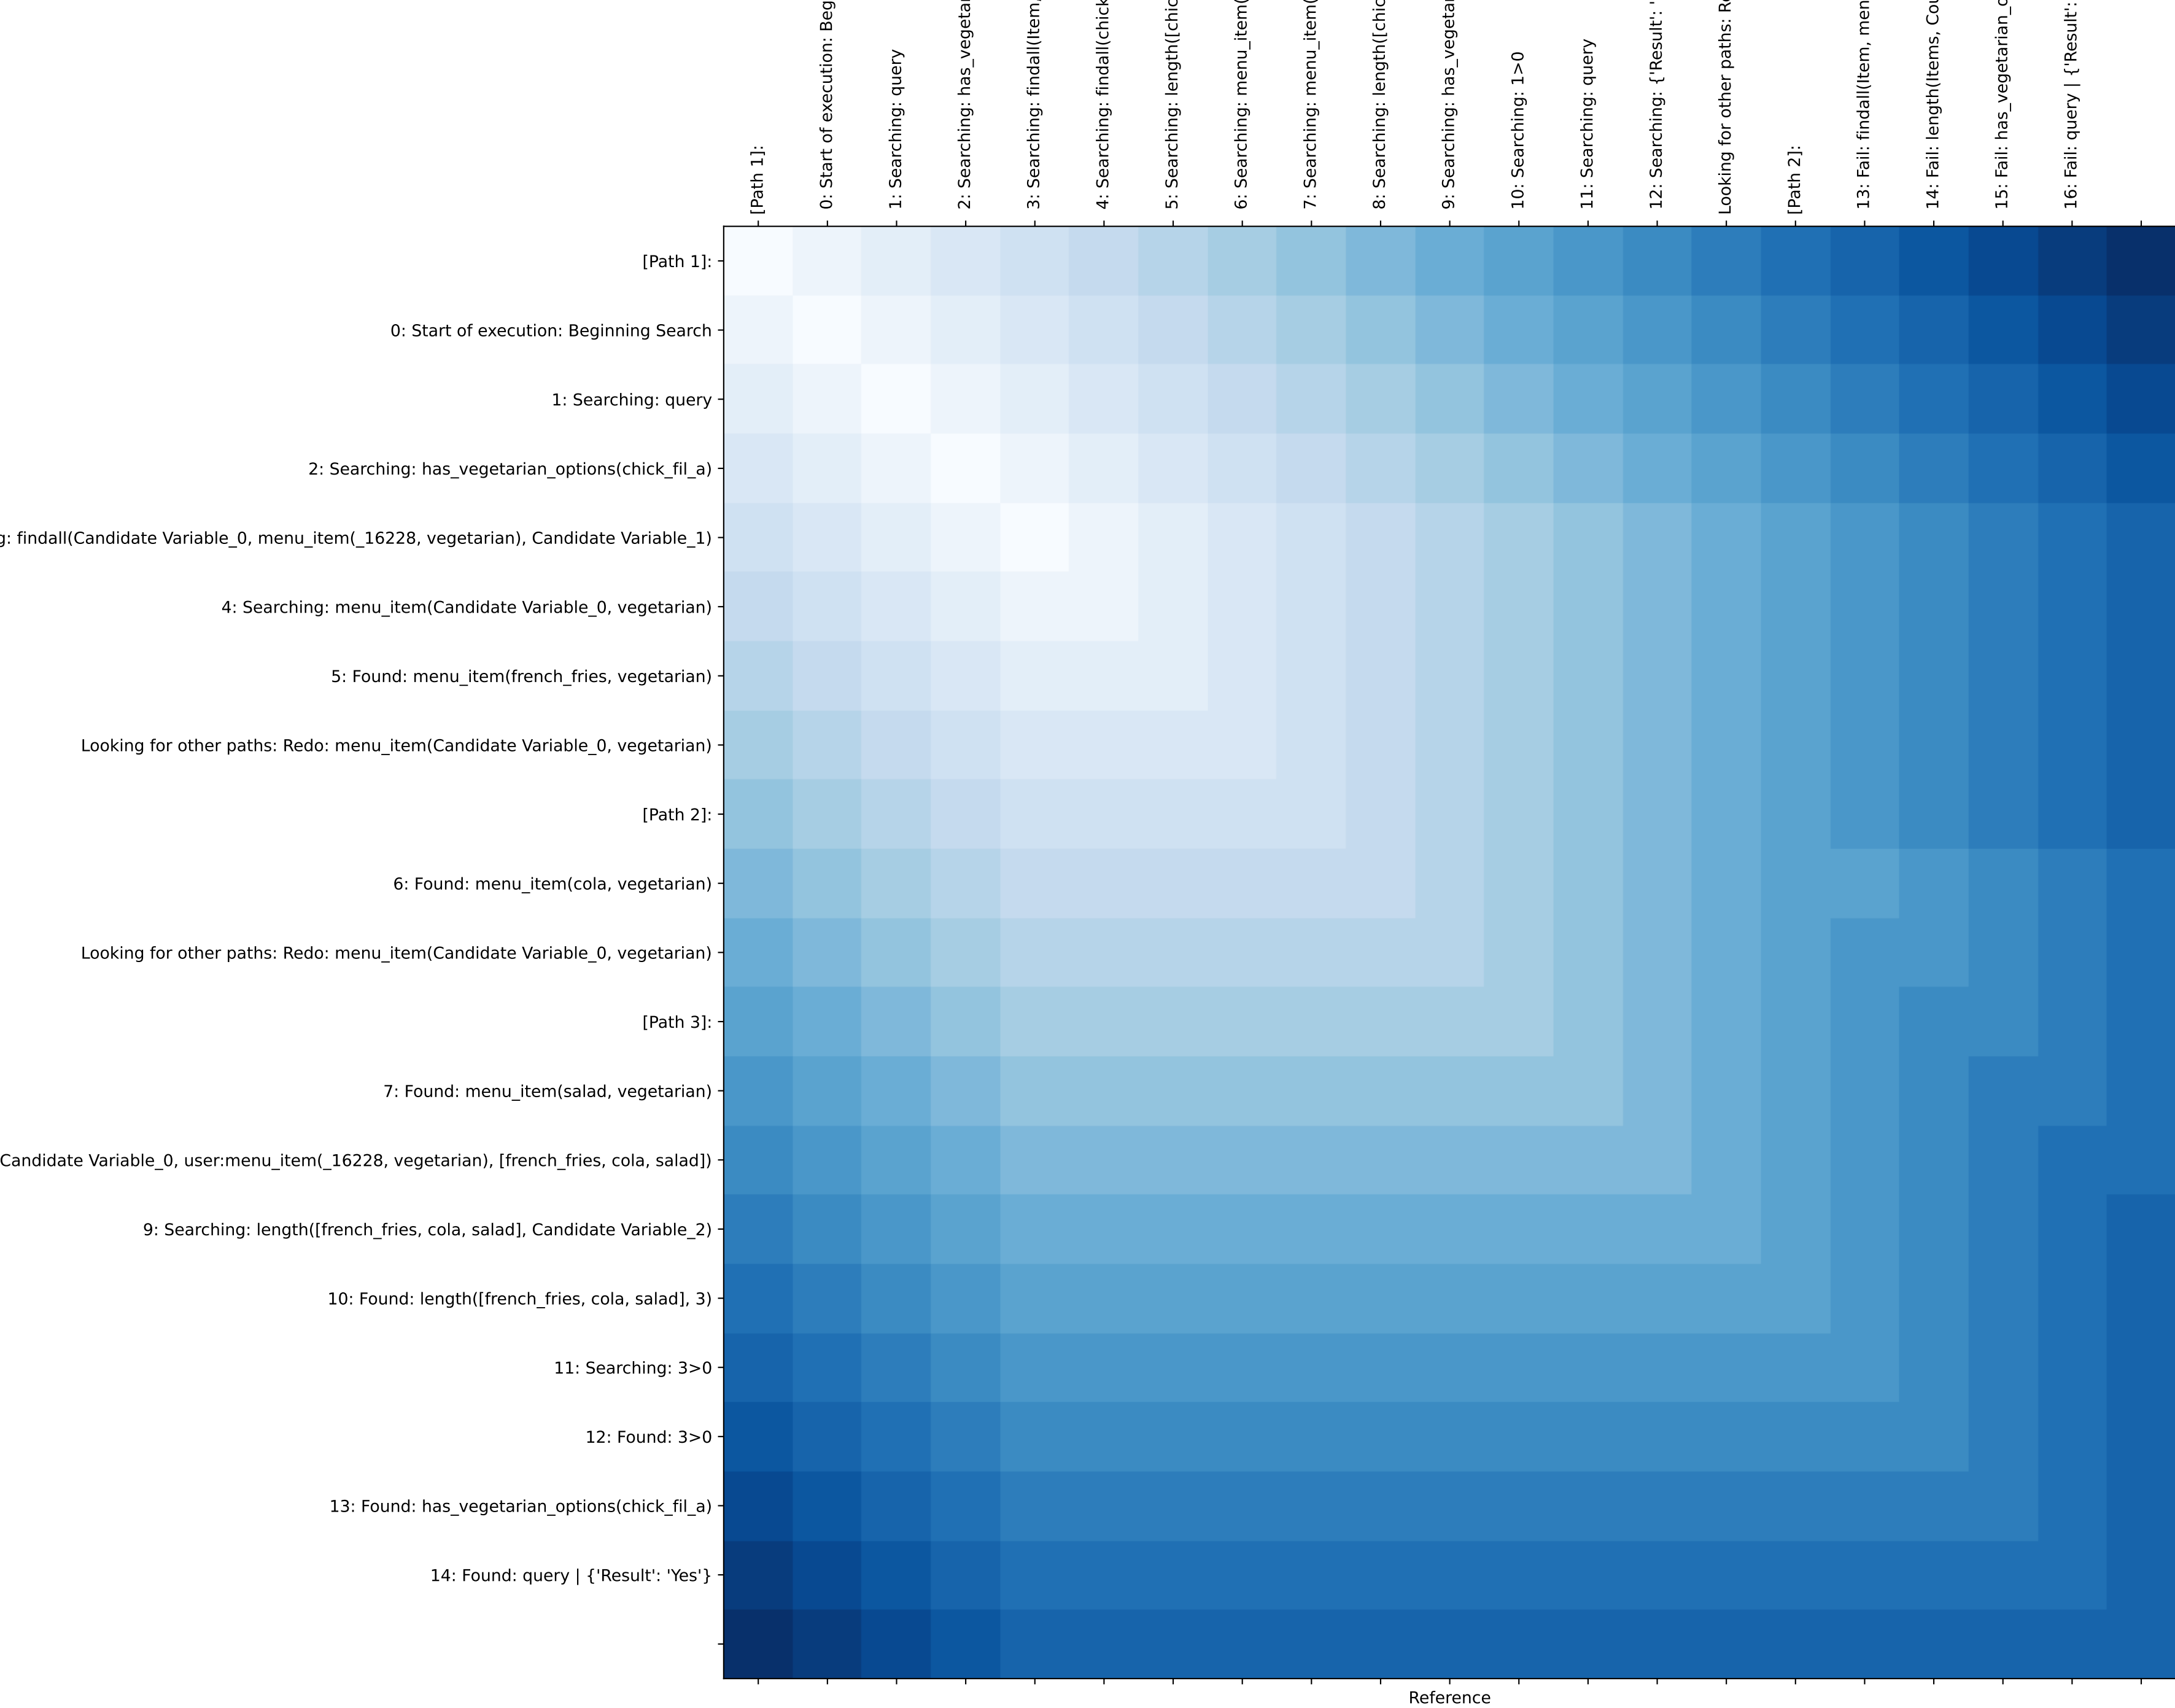

Supplement: supplementary_material [file attachment]

Hypothesis

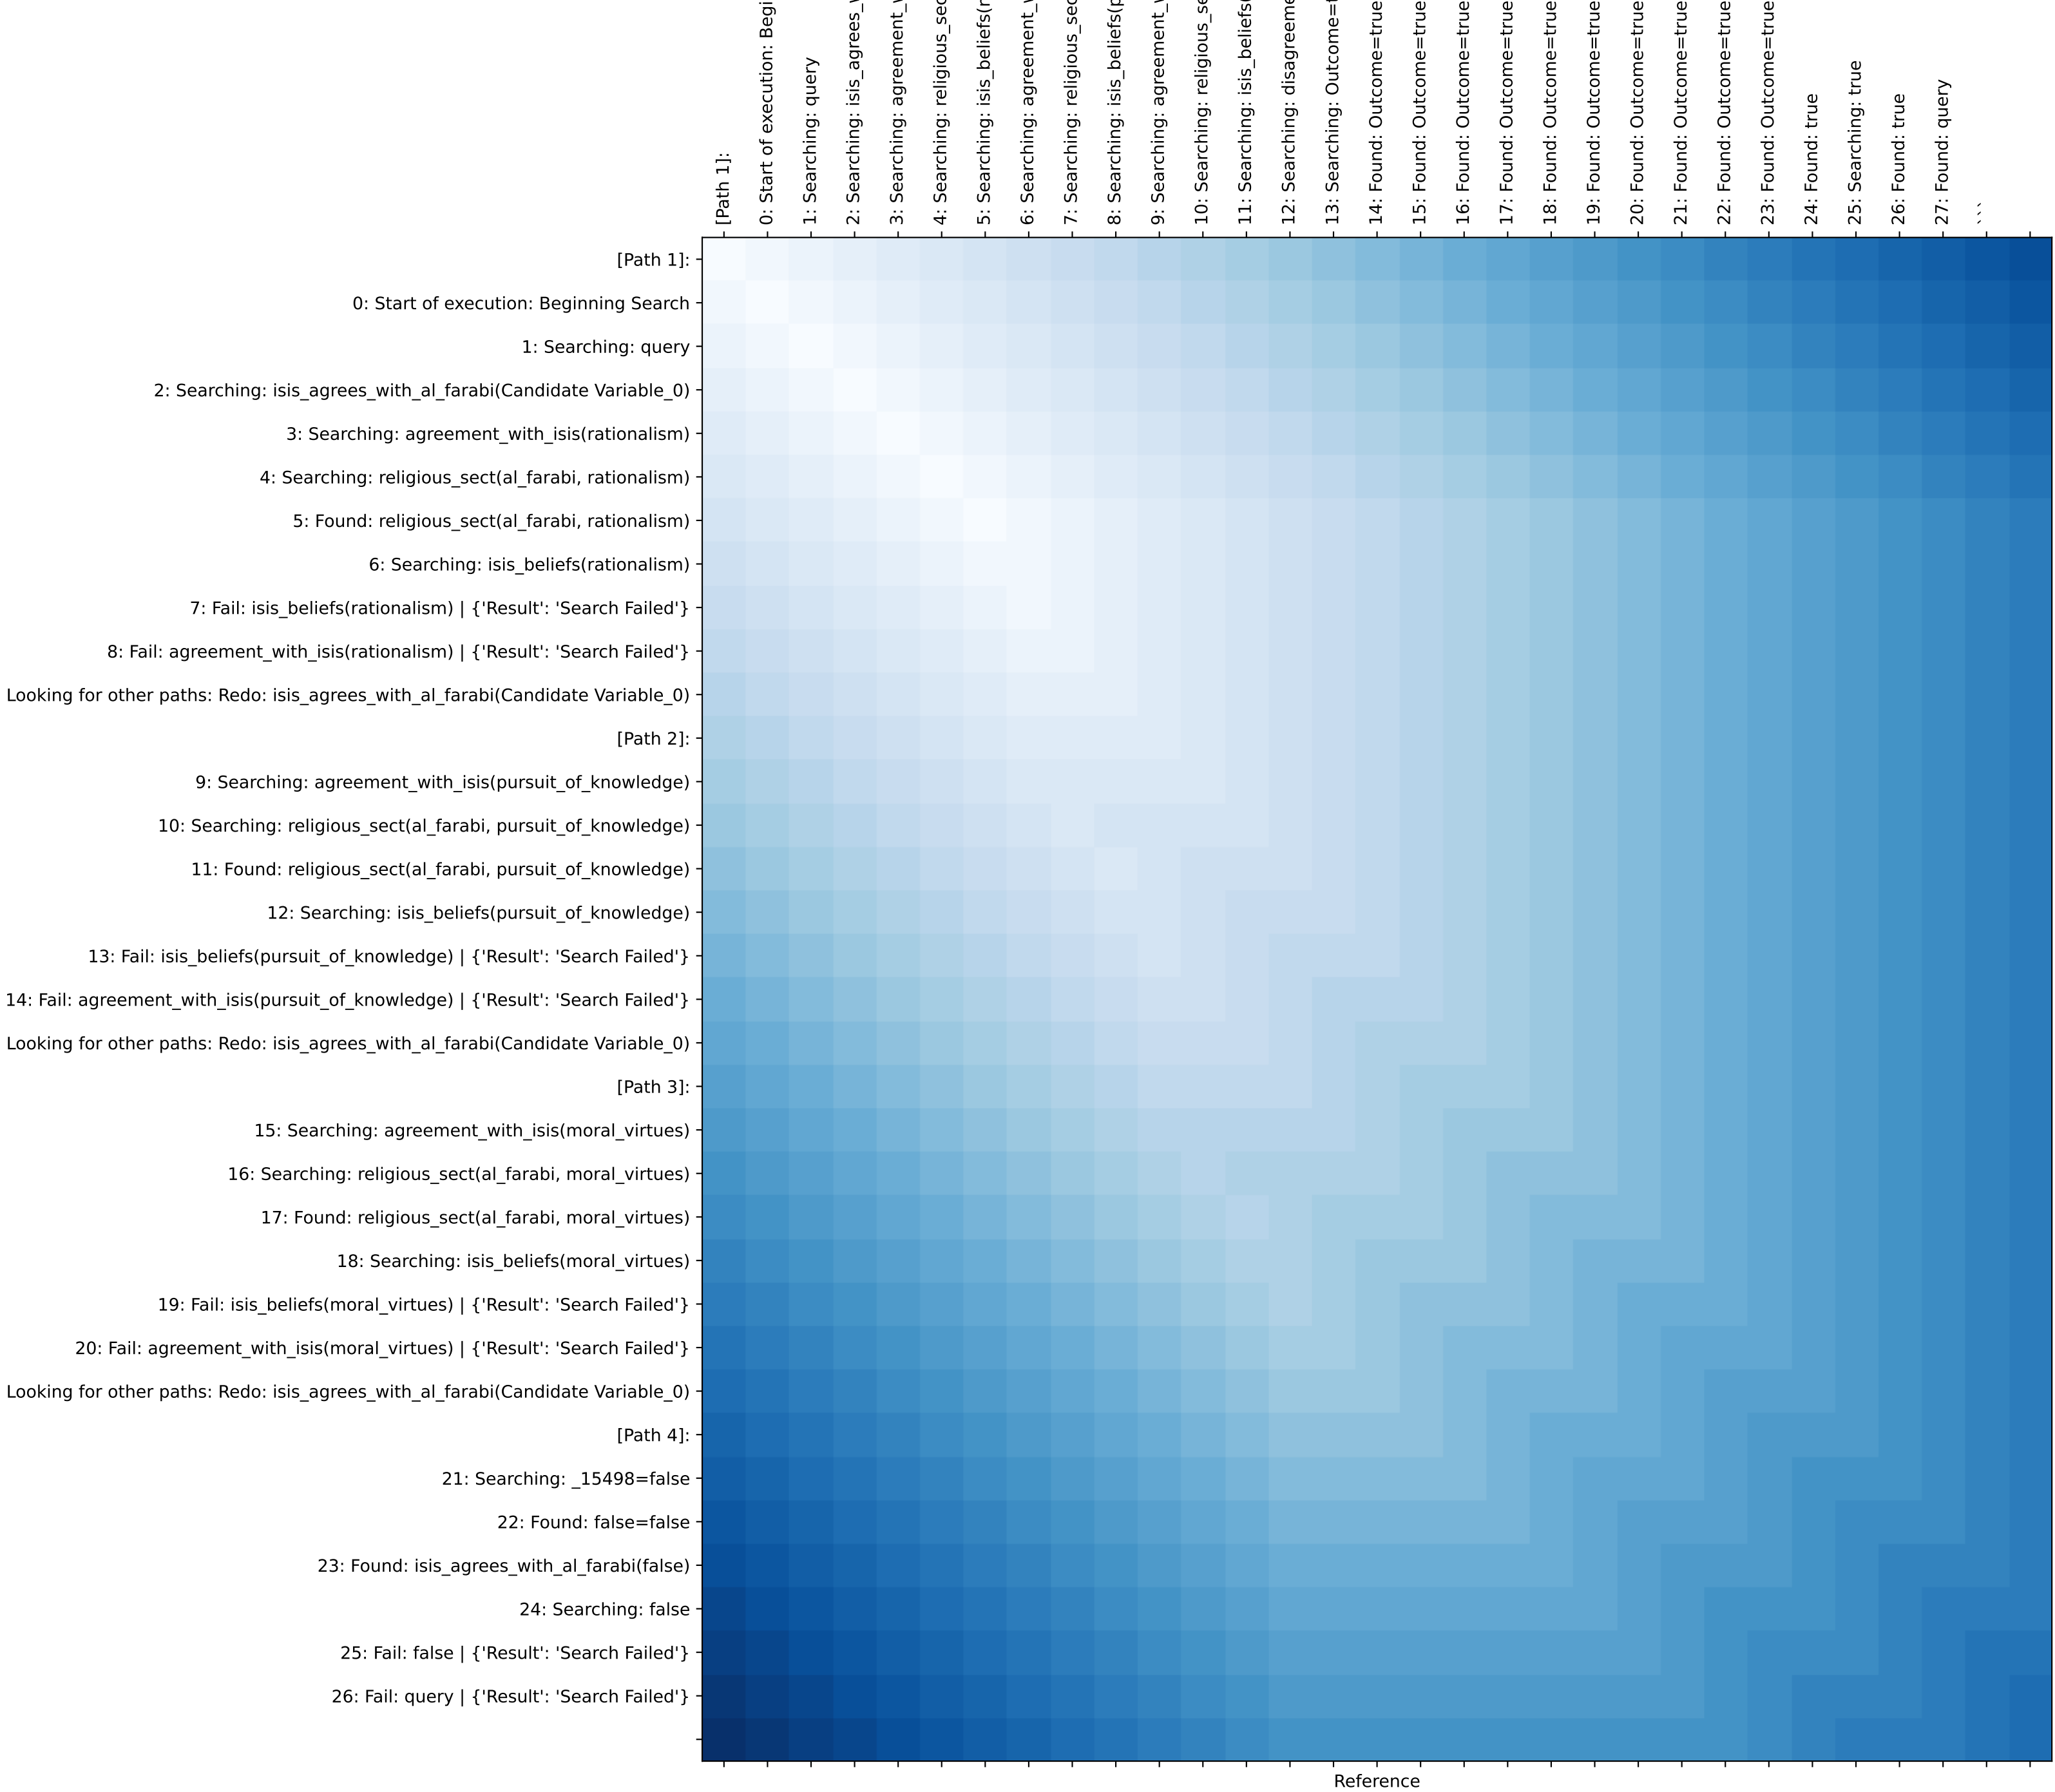

Reference

Supplement: supplementary_material [file attachment]

Hypothesis

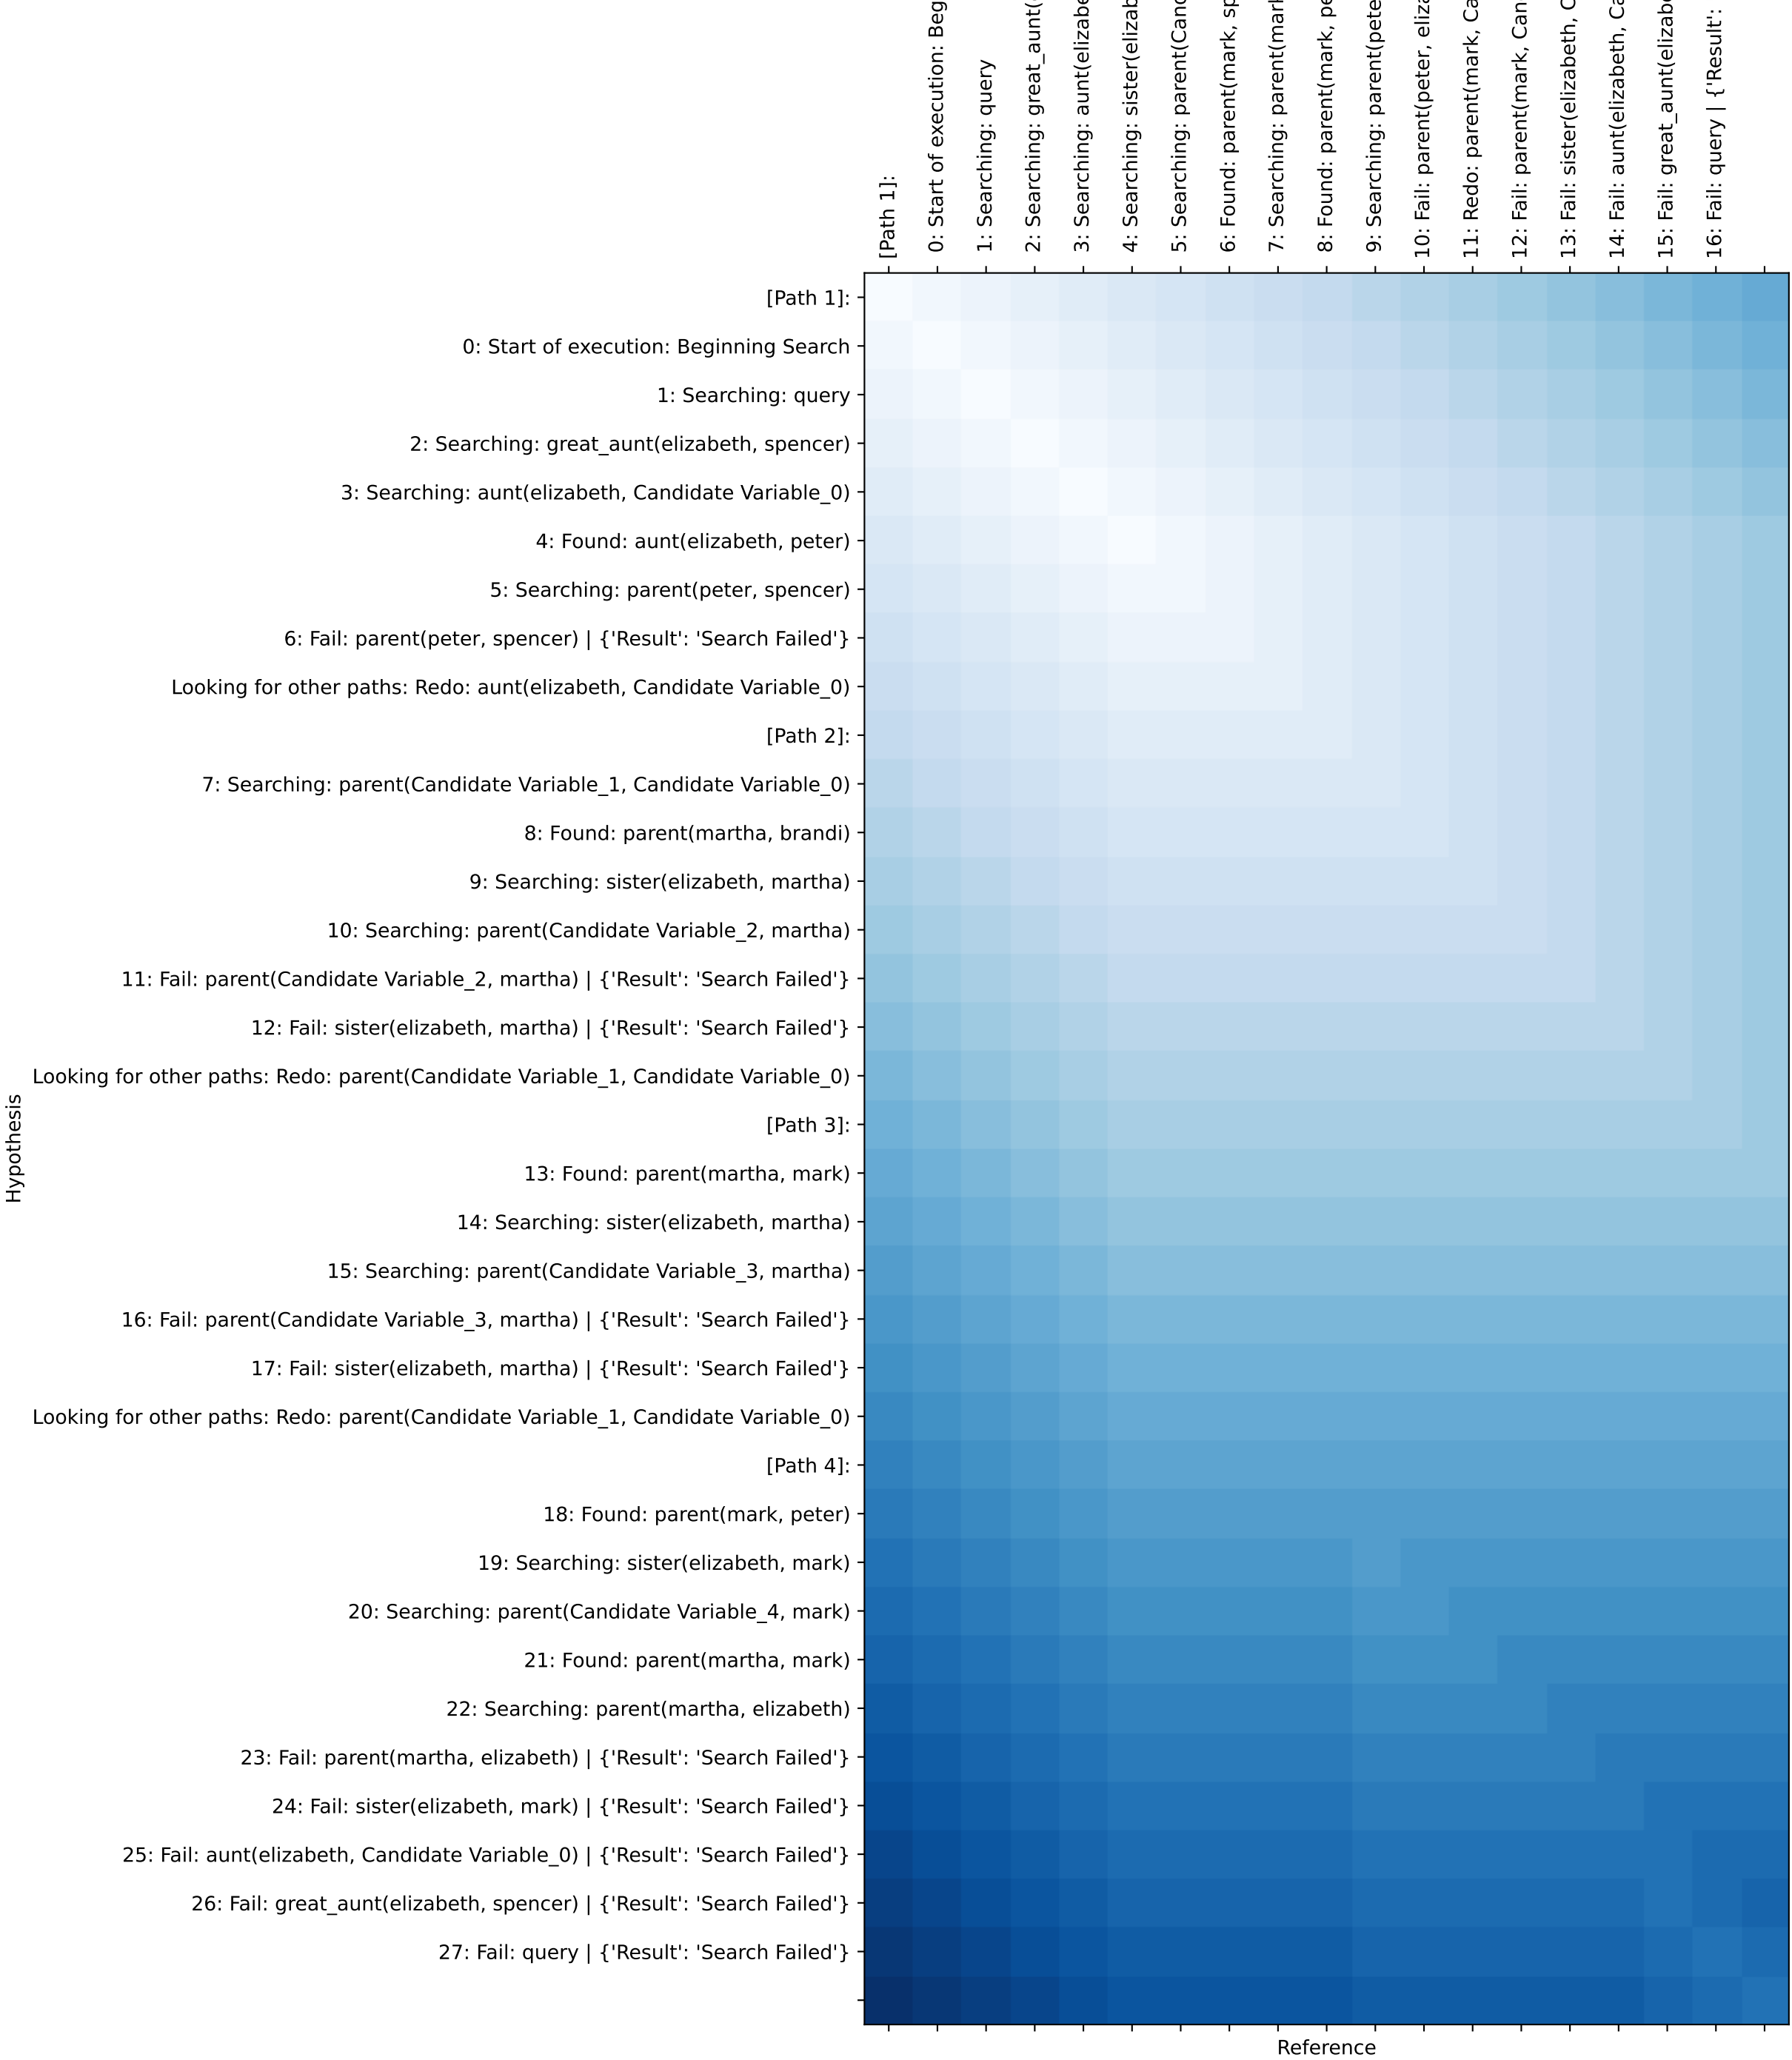

Reference

Supplement: supplementary_material [file attachment]

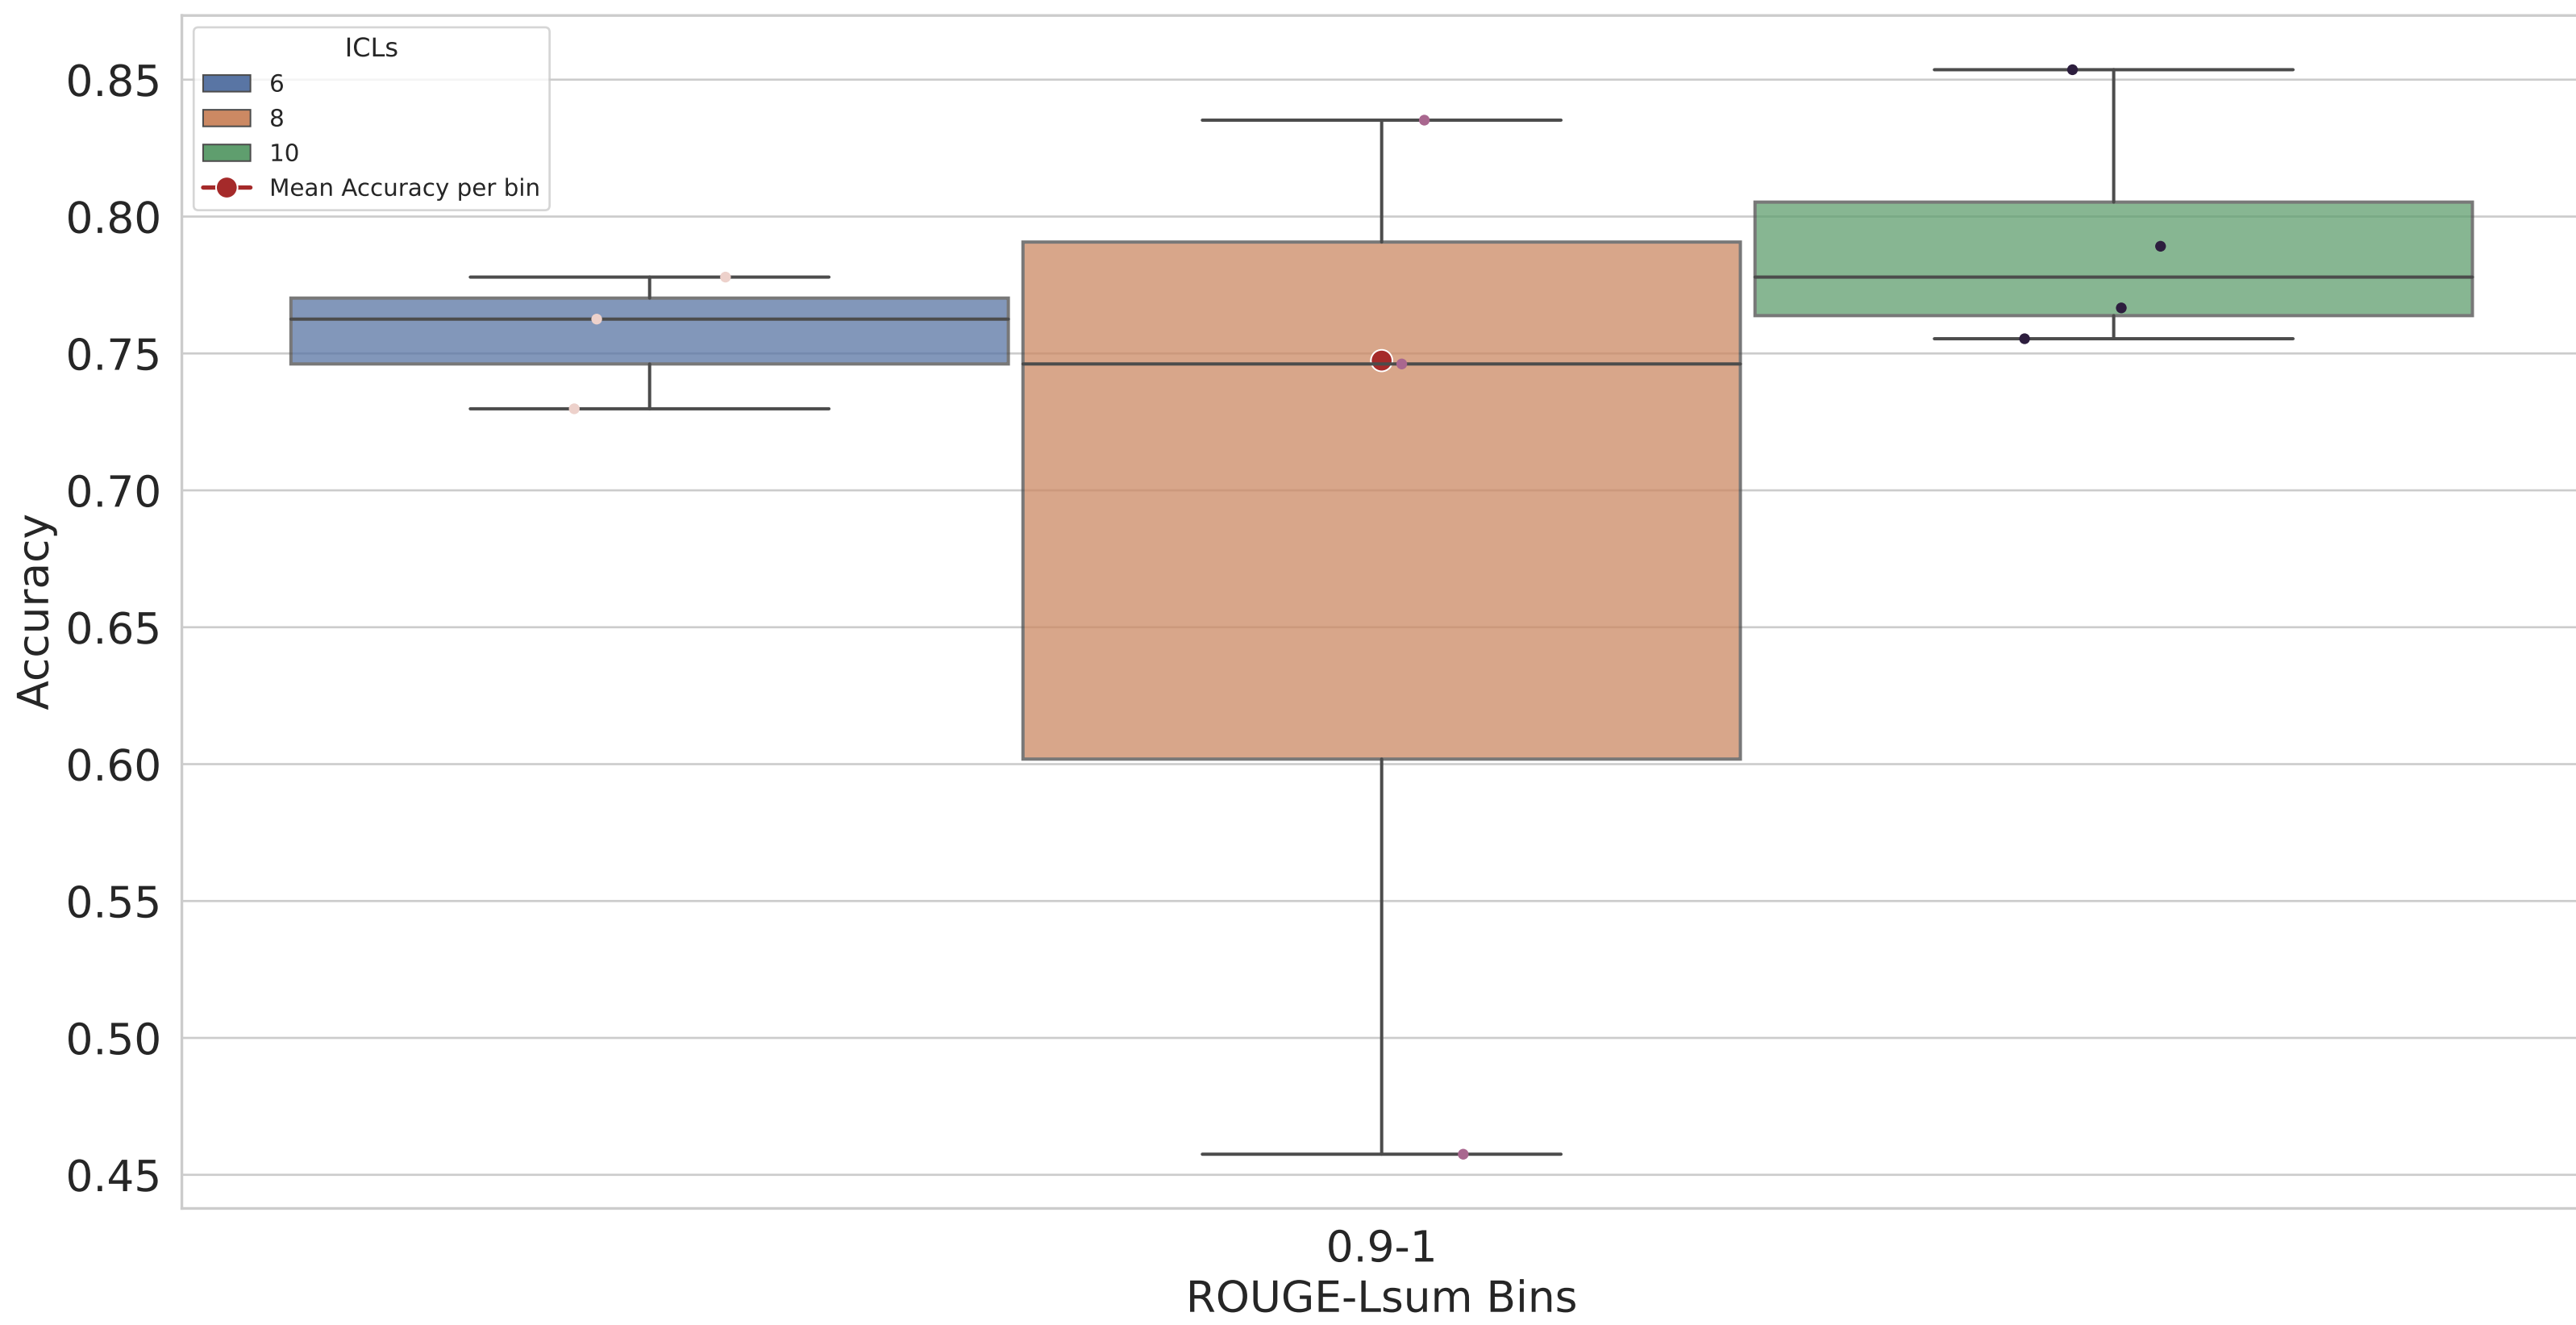

Supplement: supplementary_material [file attachment]

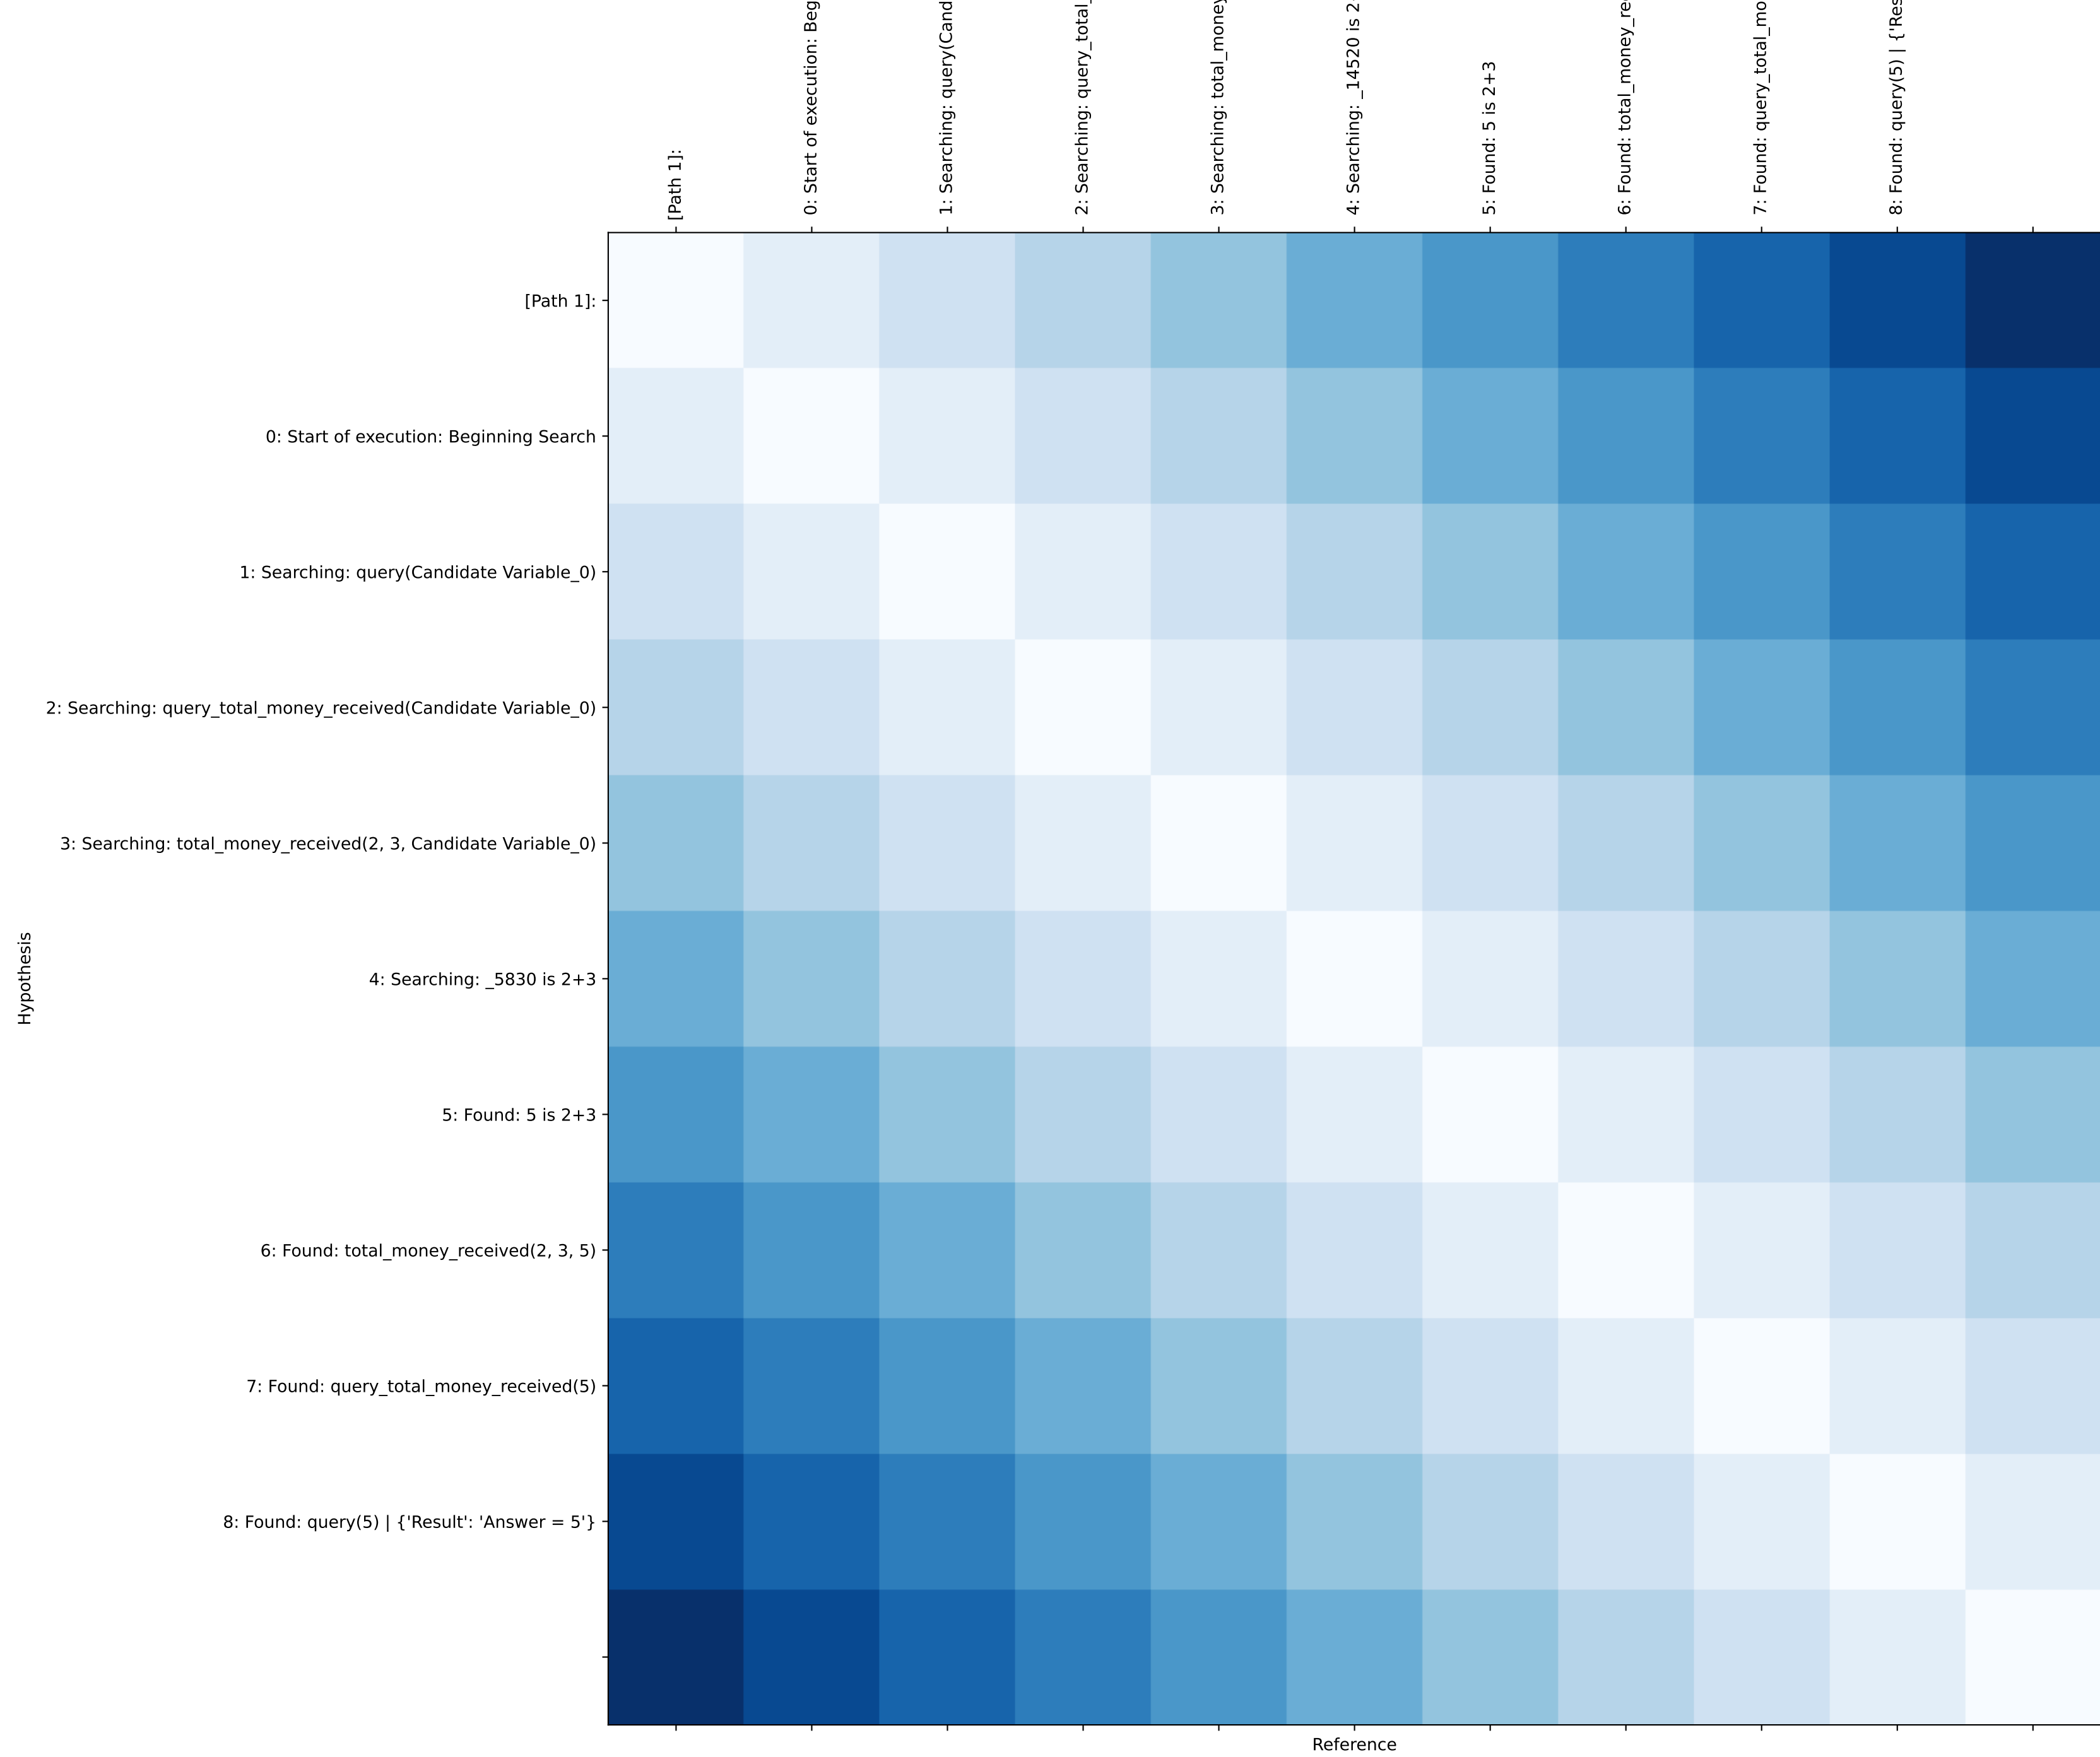

Supplement: supplementary_material [file attachment]

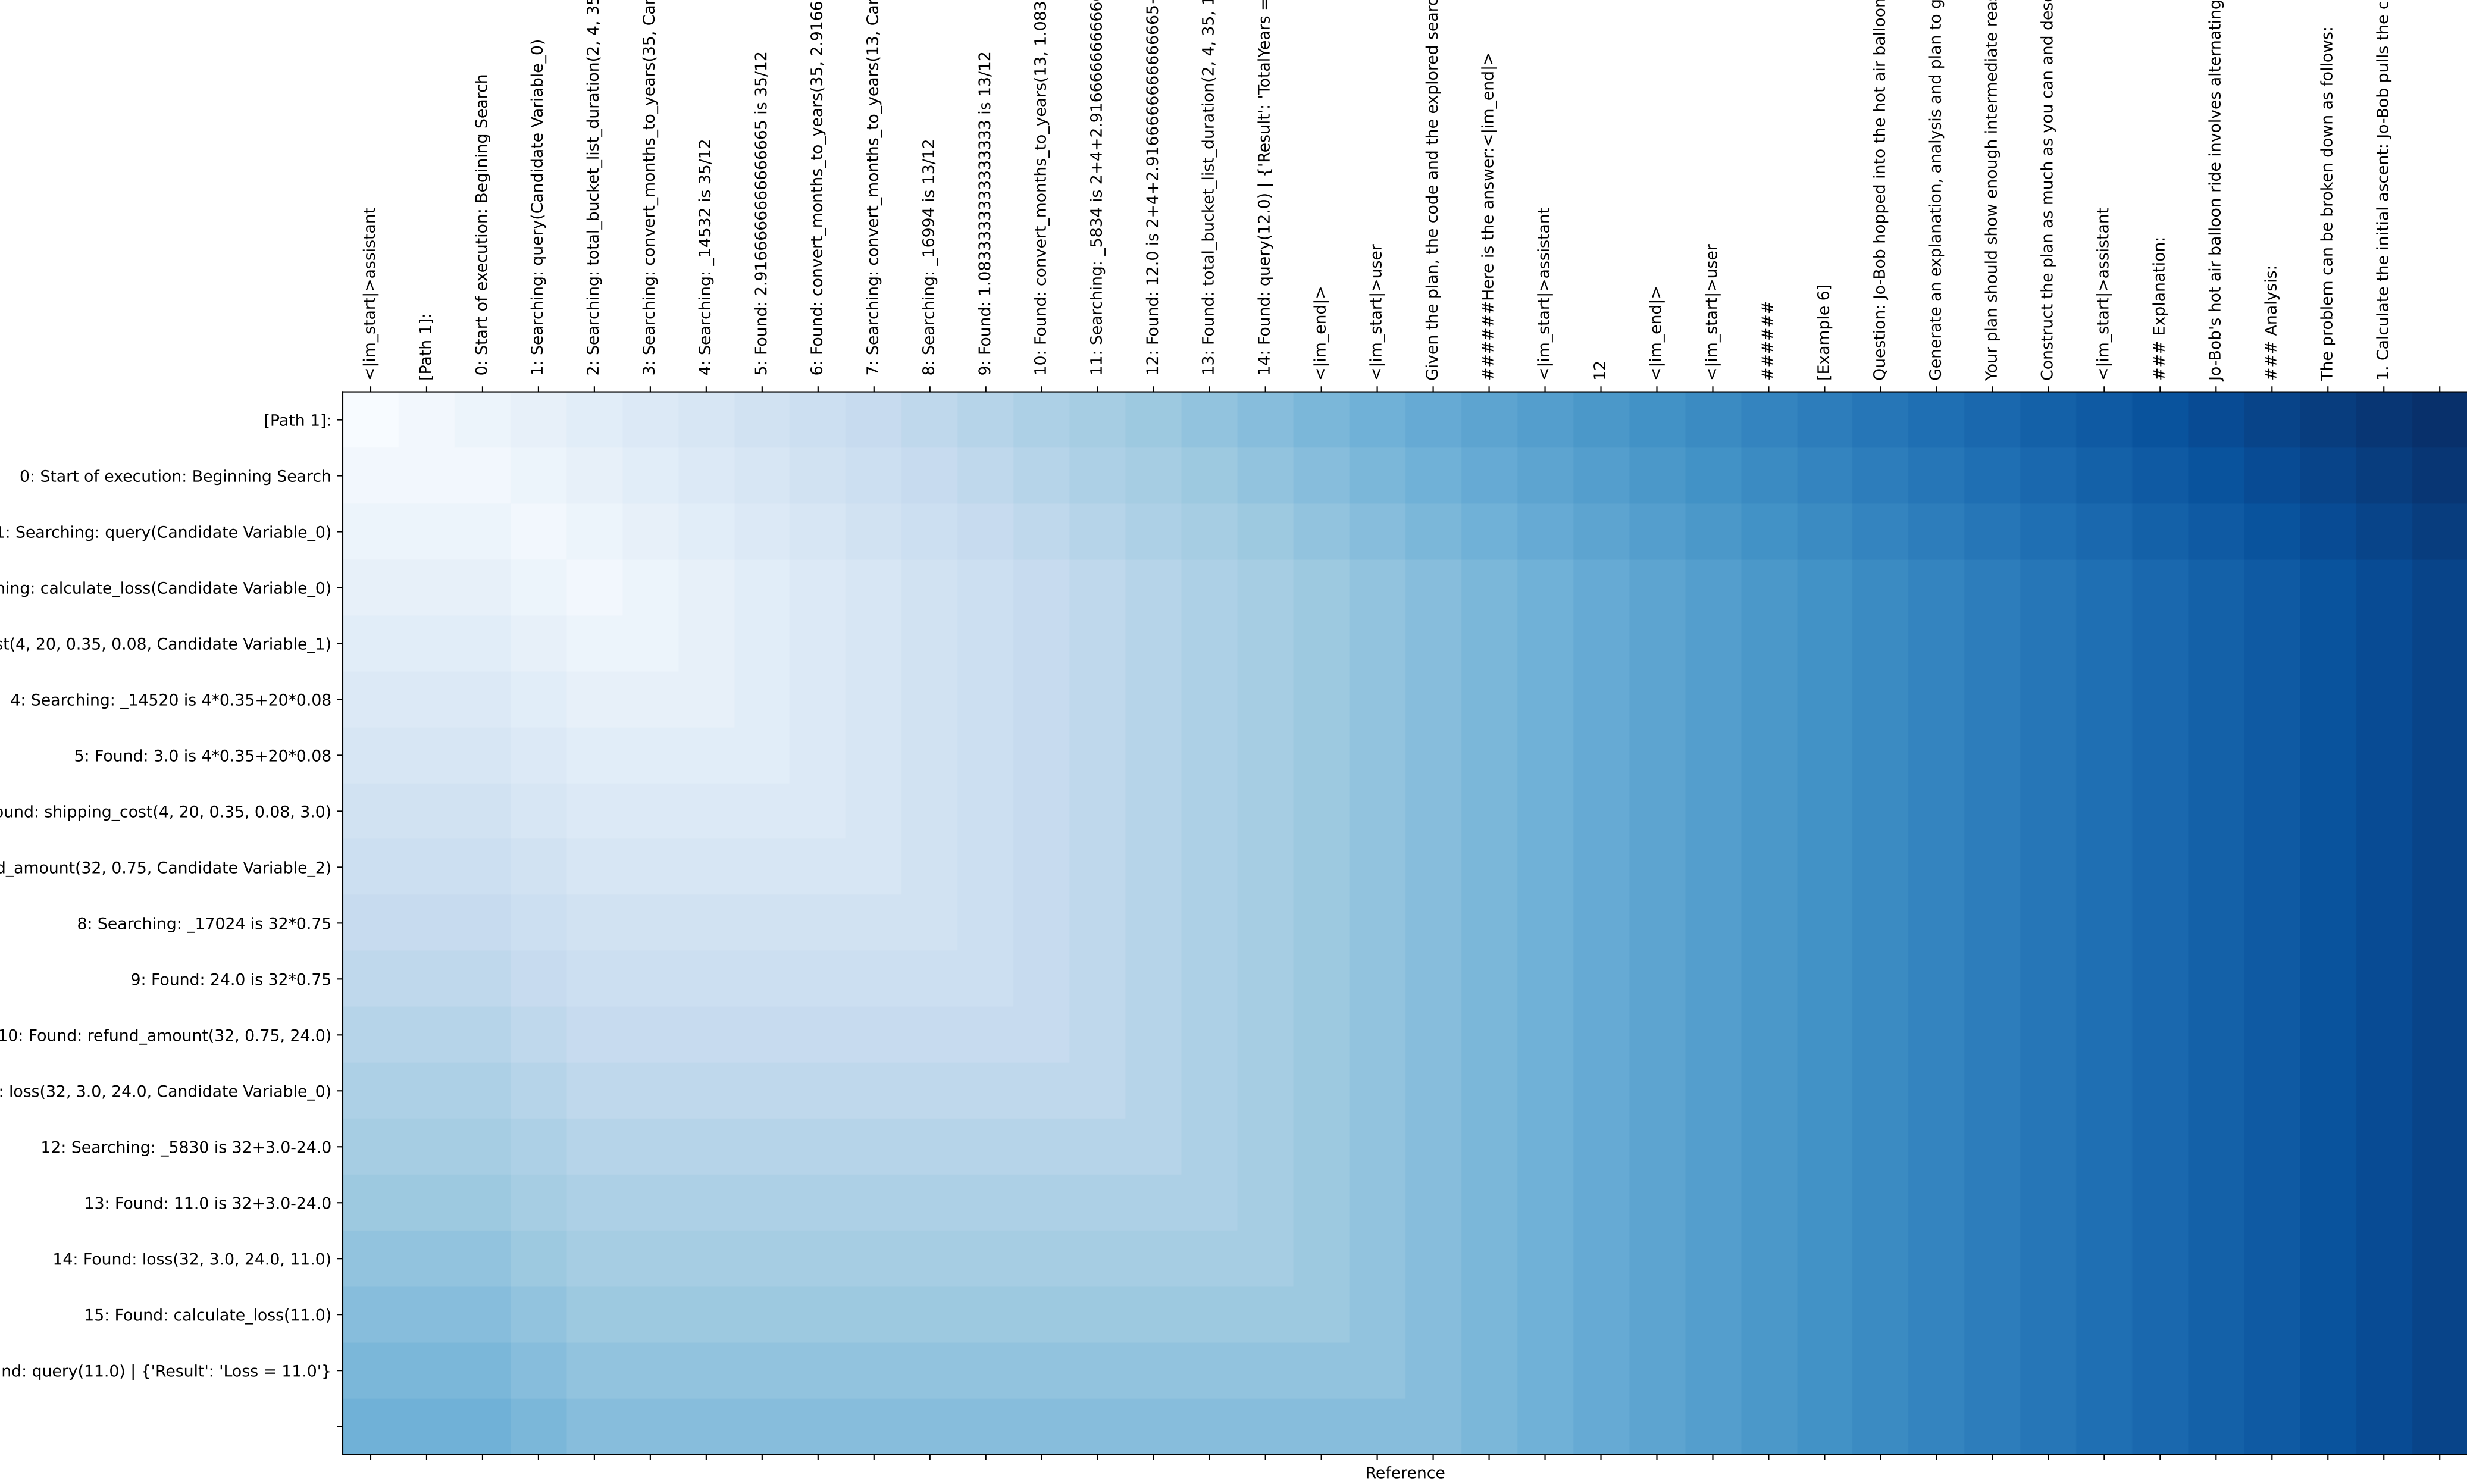

Supplement: supplementary_material [file attachment]

Hypothesis

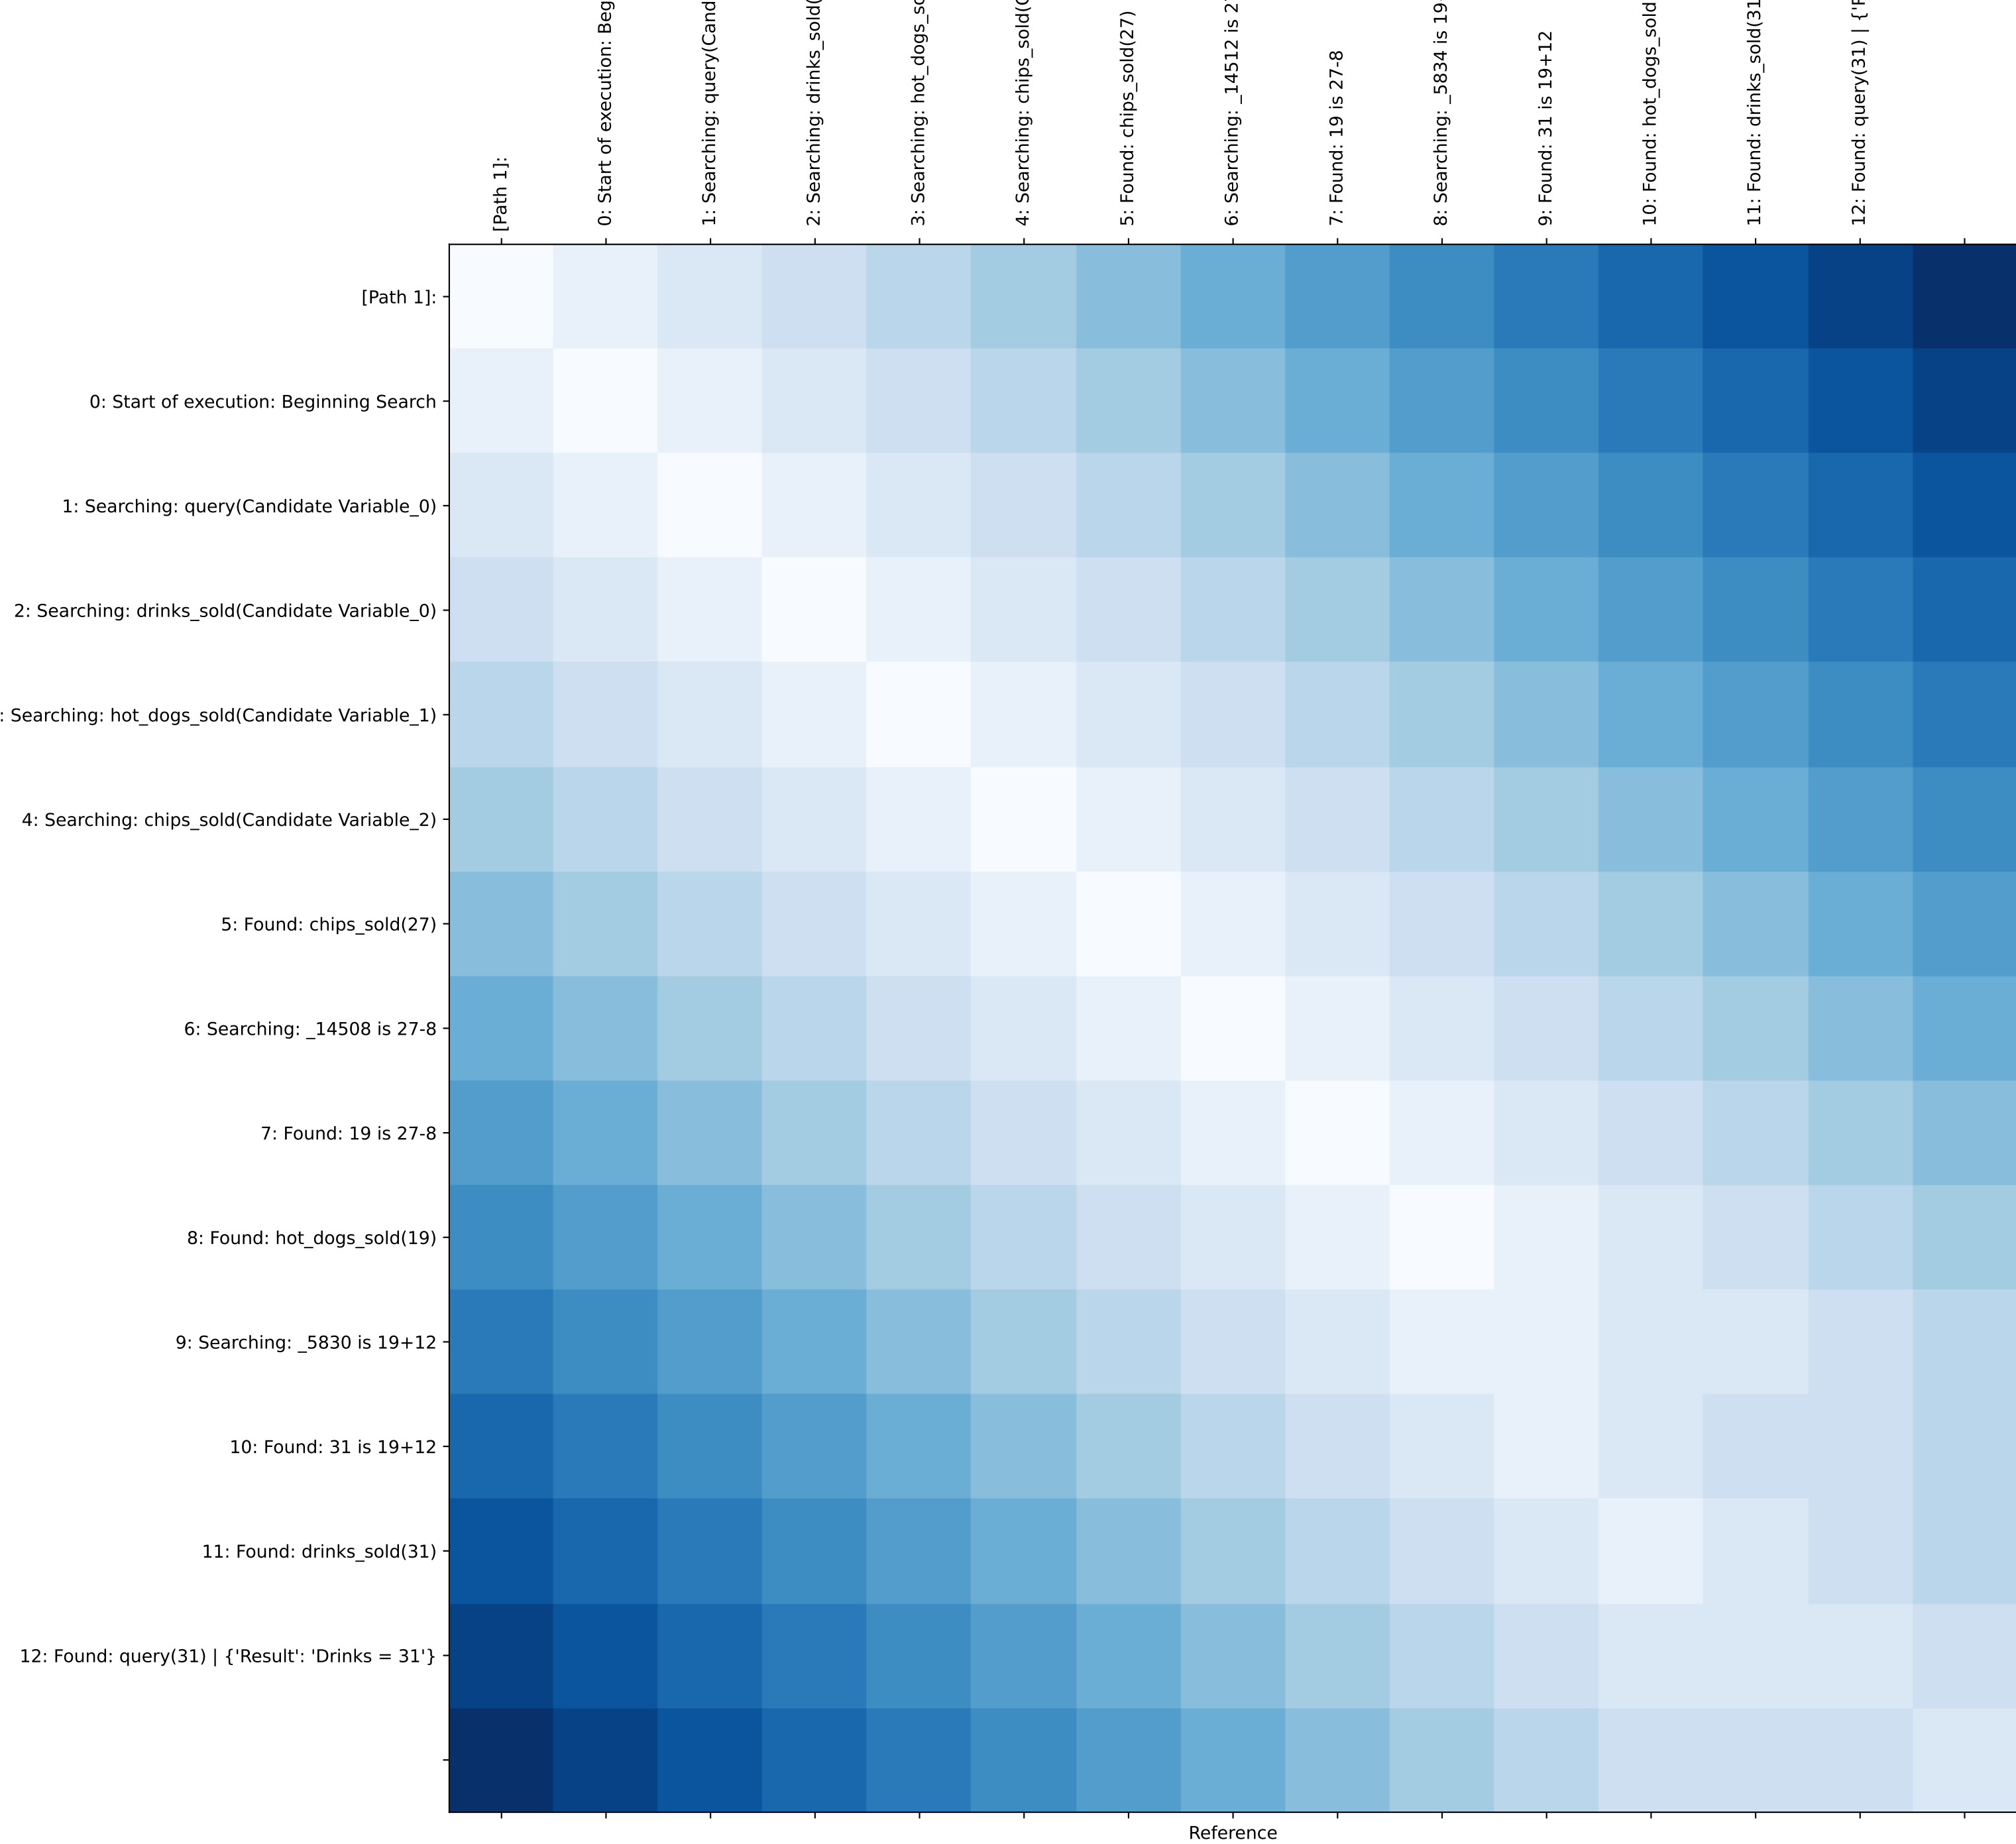

Supplement: supplementary_material [file attachment]

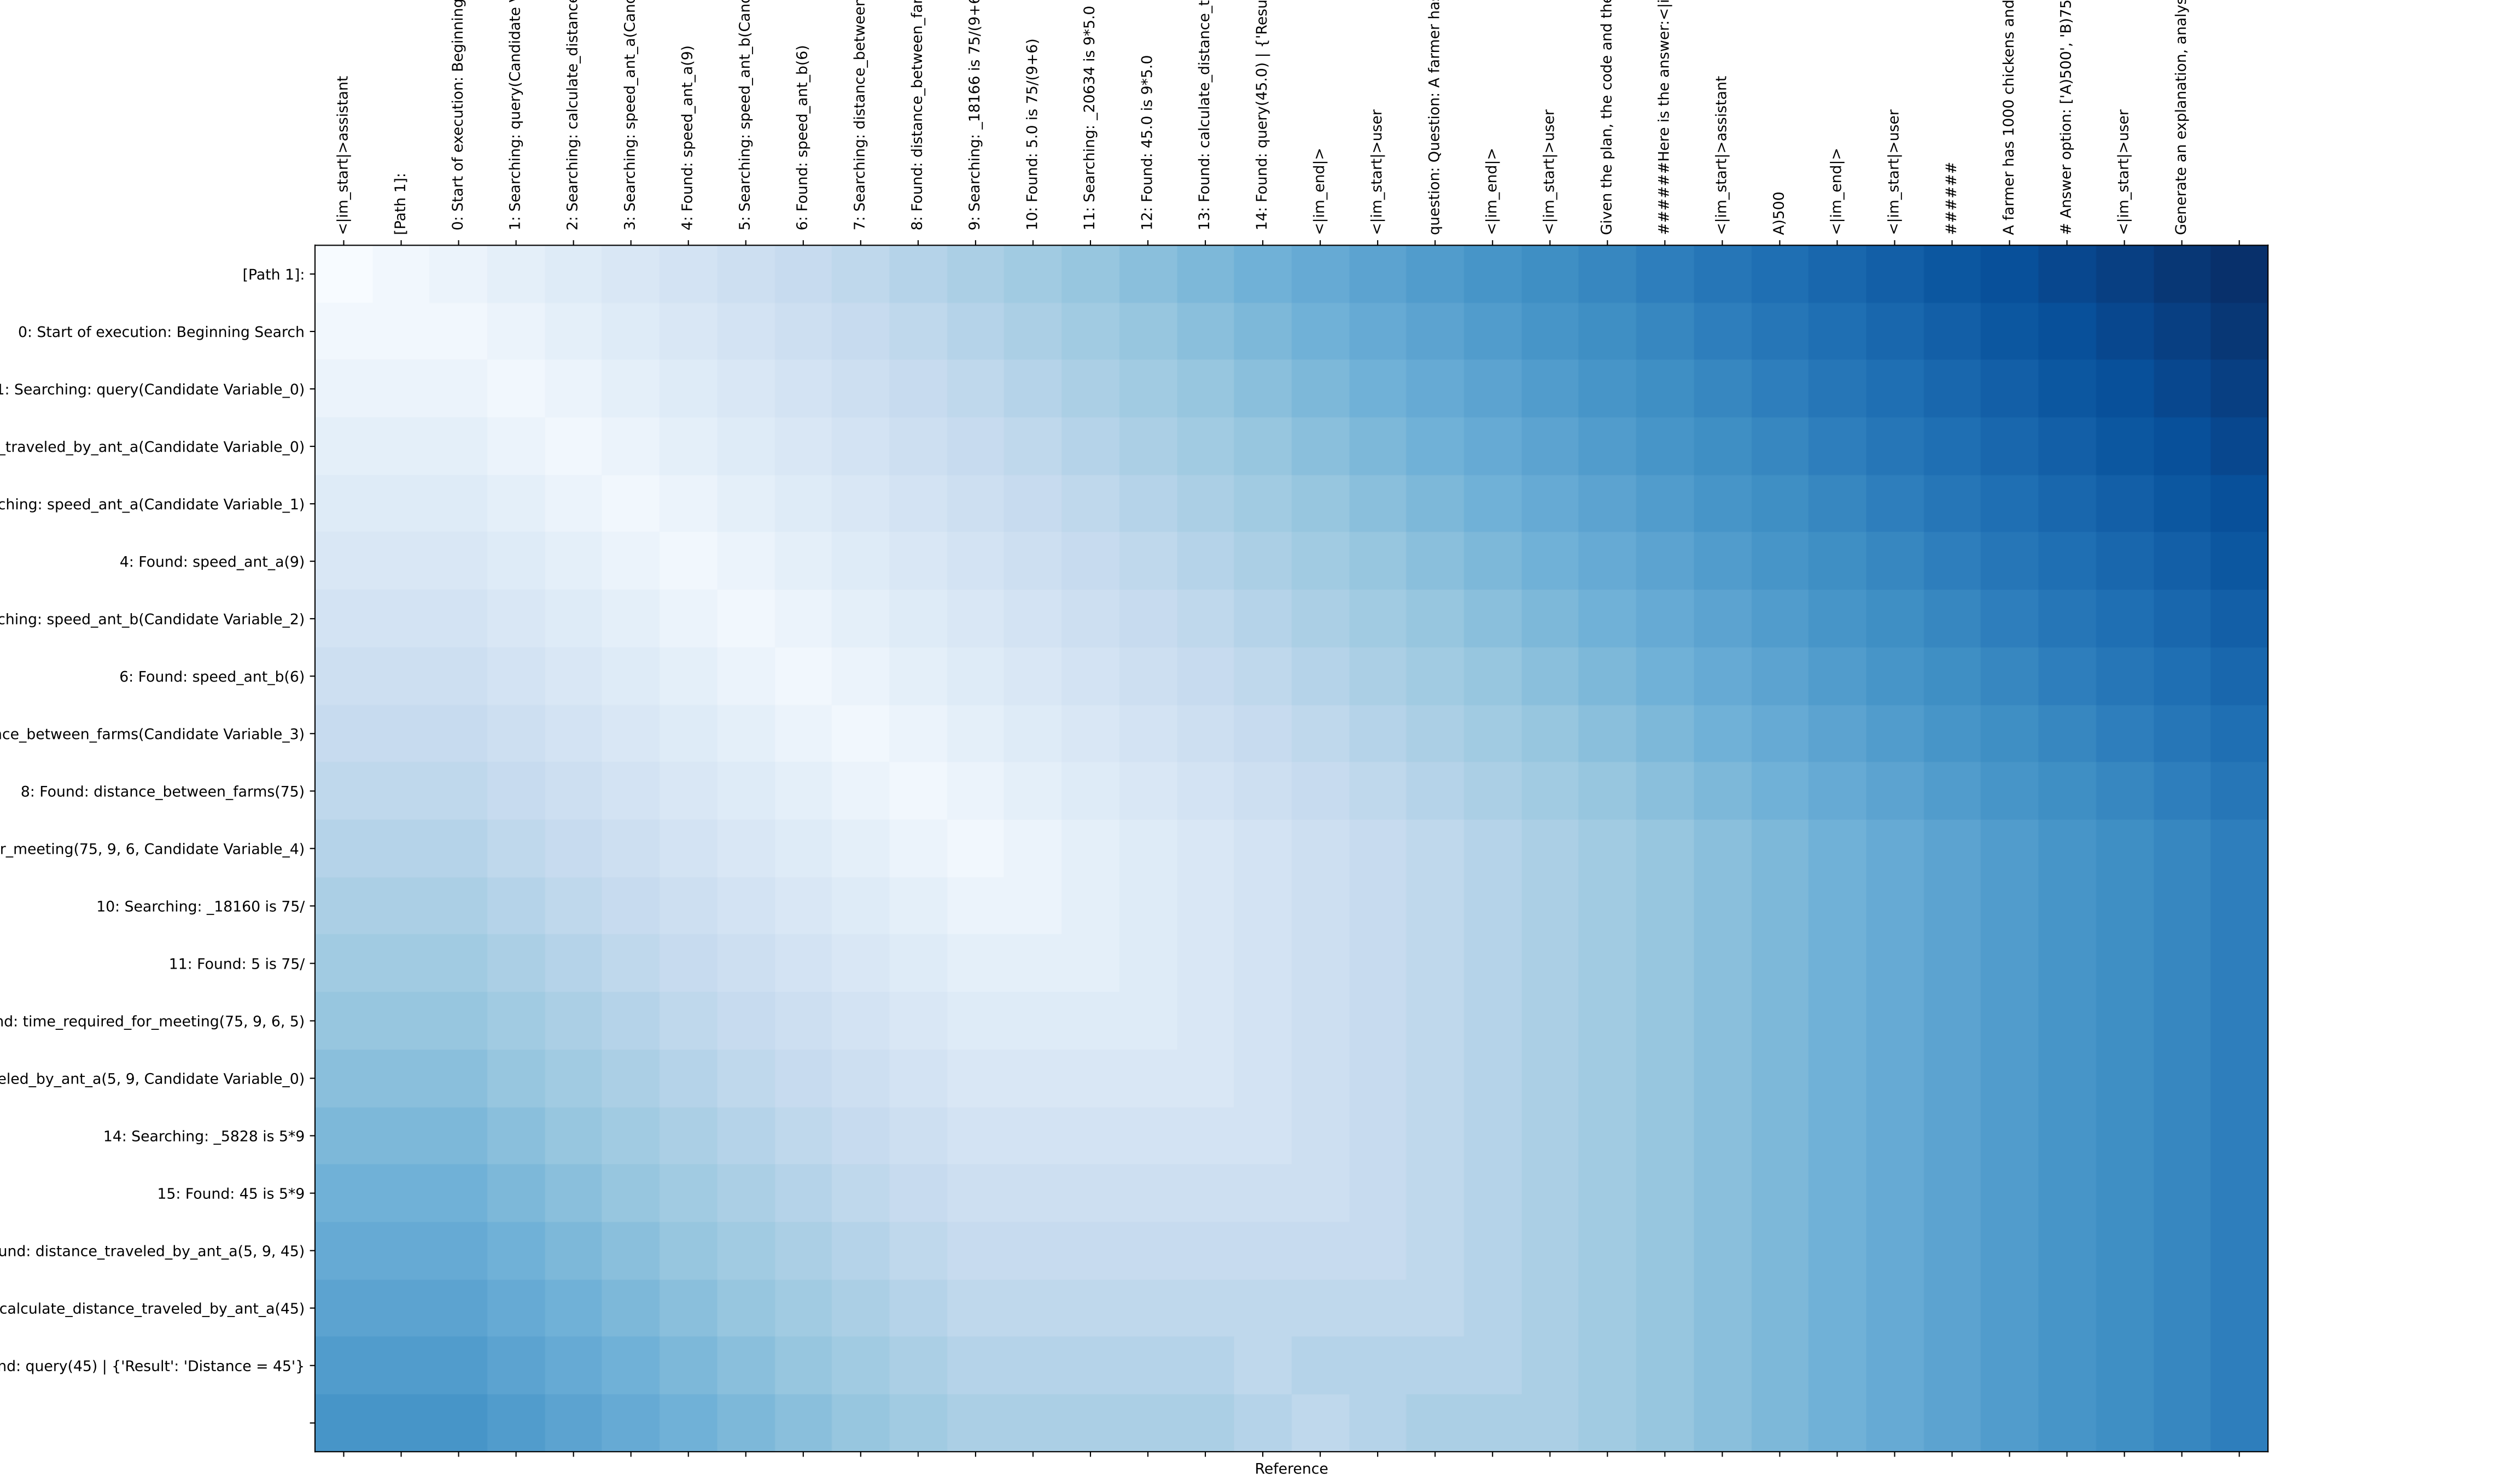

Supplement: supplementary_material [file attachment]

Hypothesis

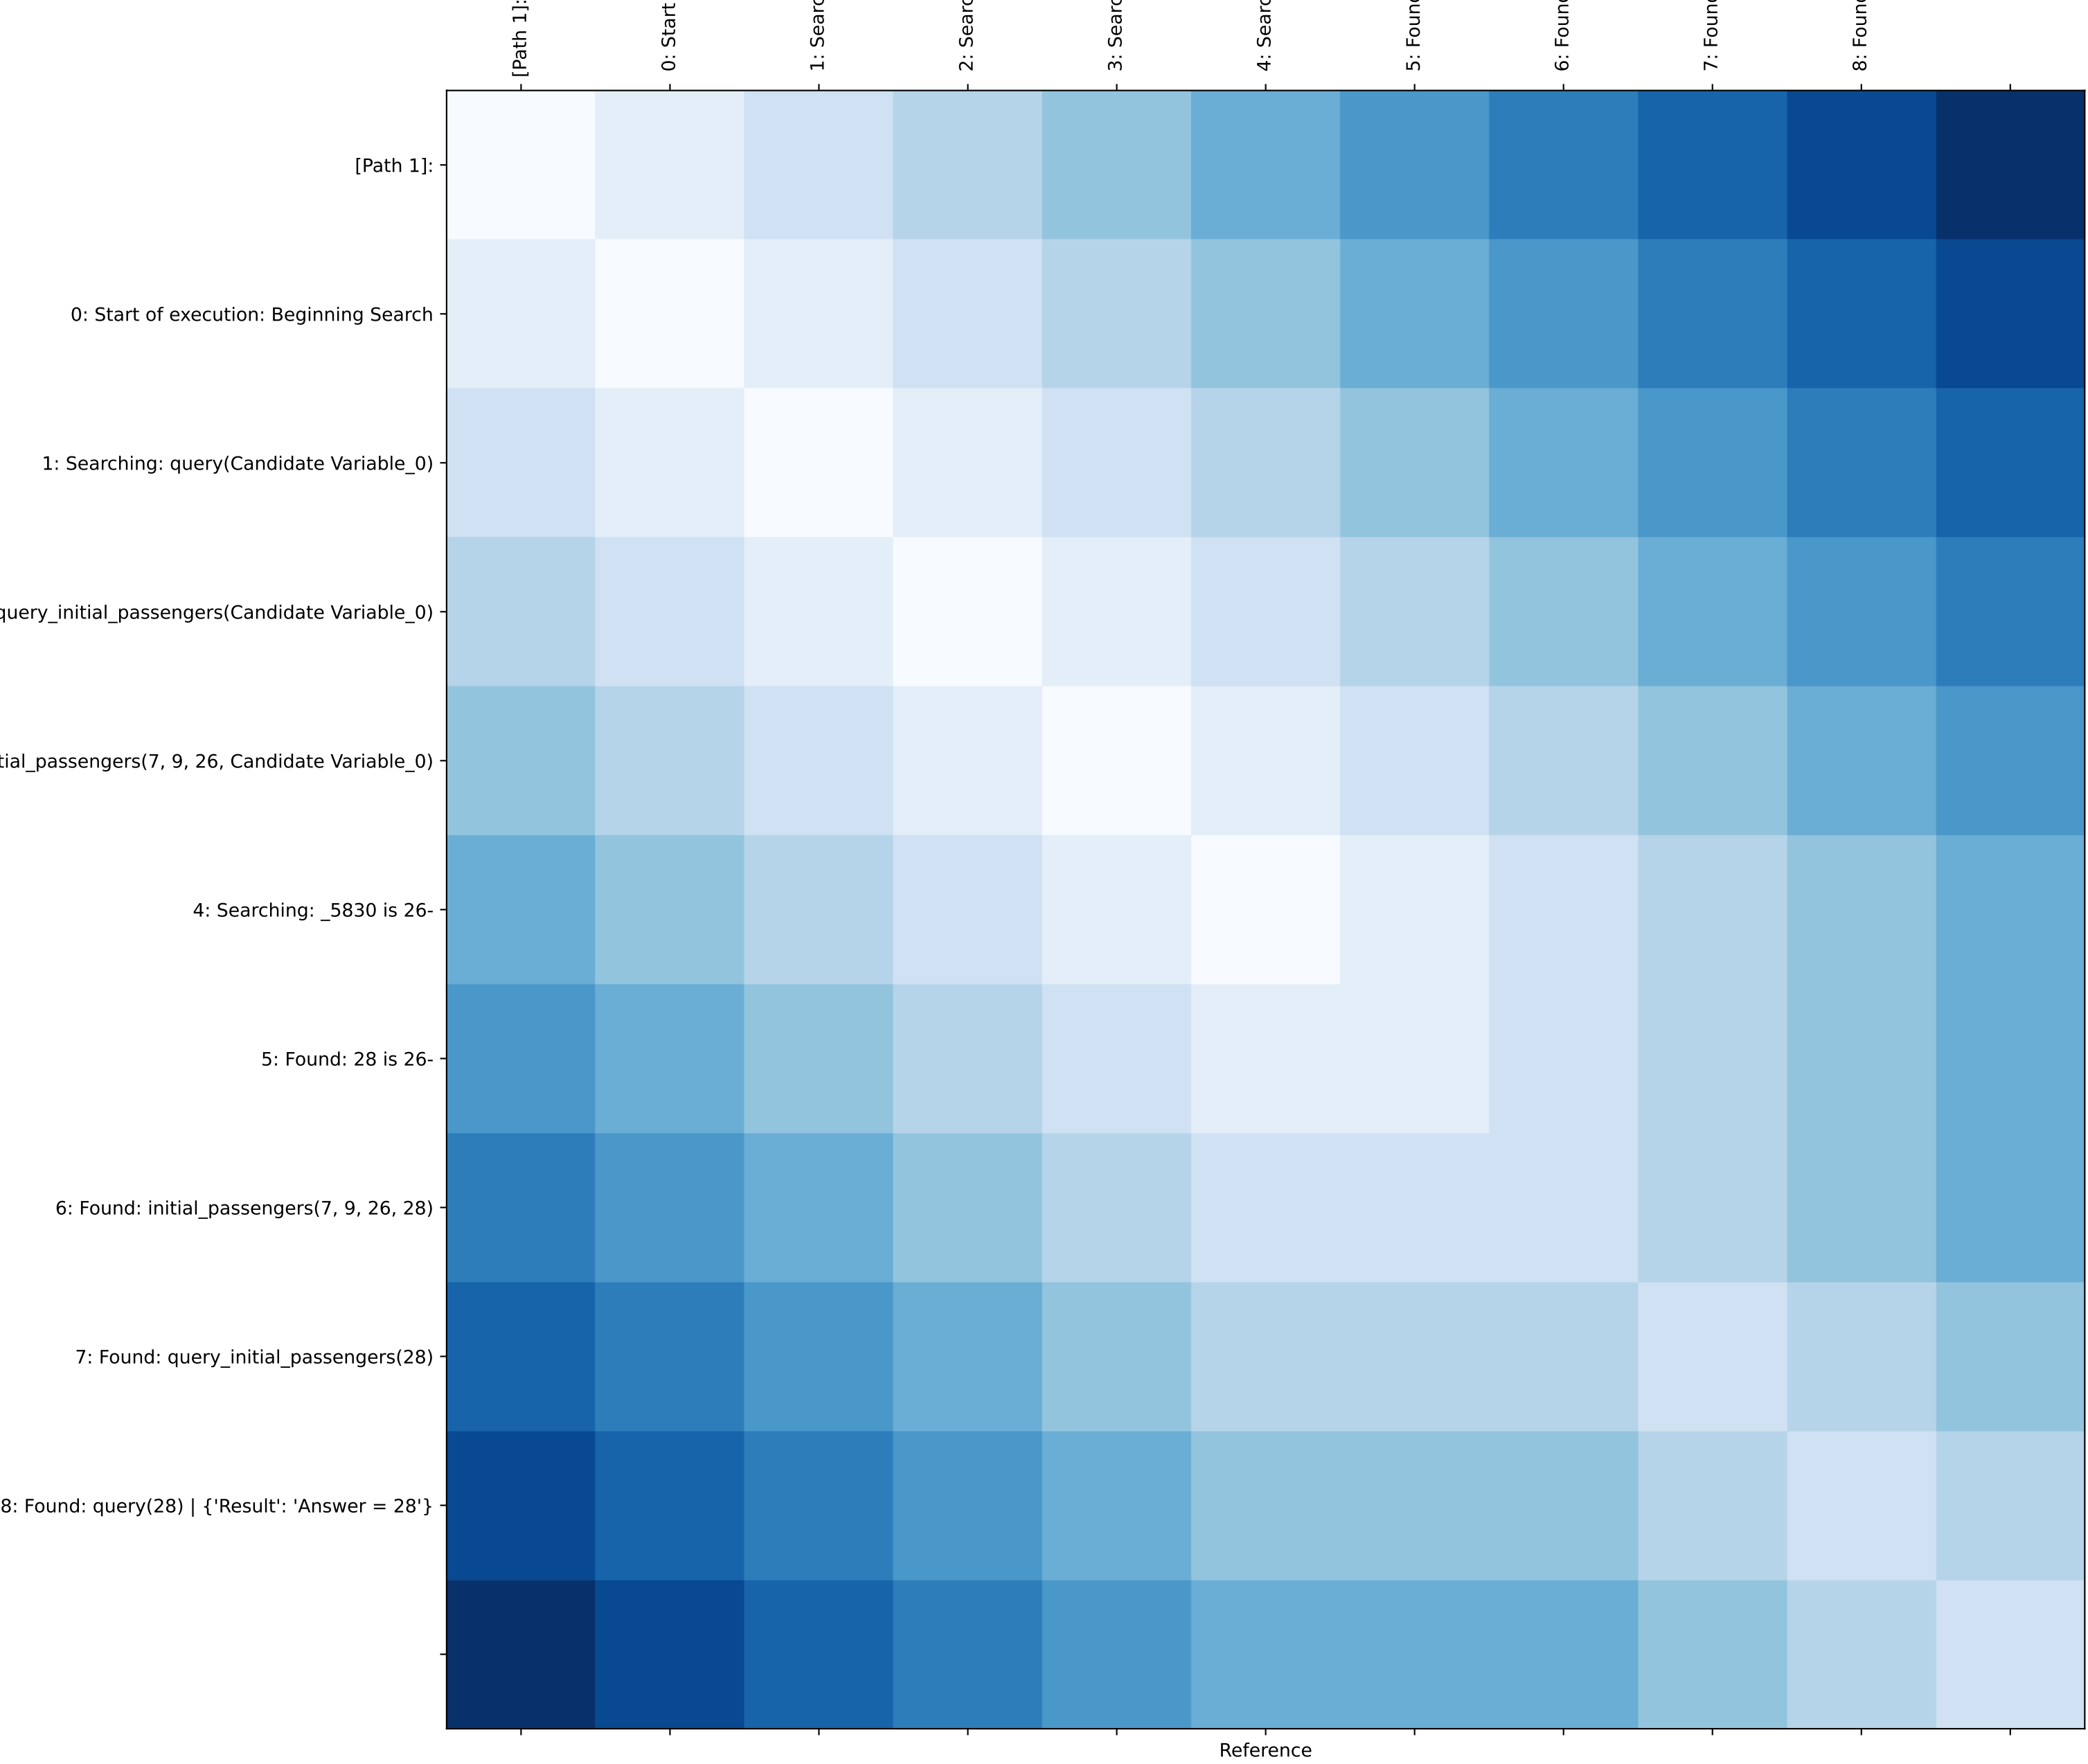

Reference

Supplement: supplementary_material [file attachment]

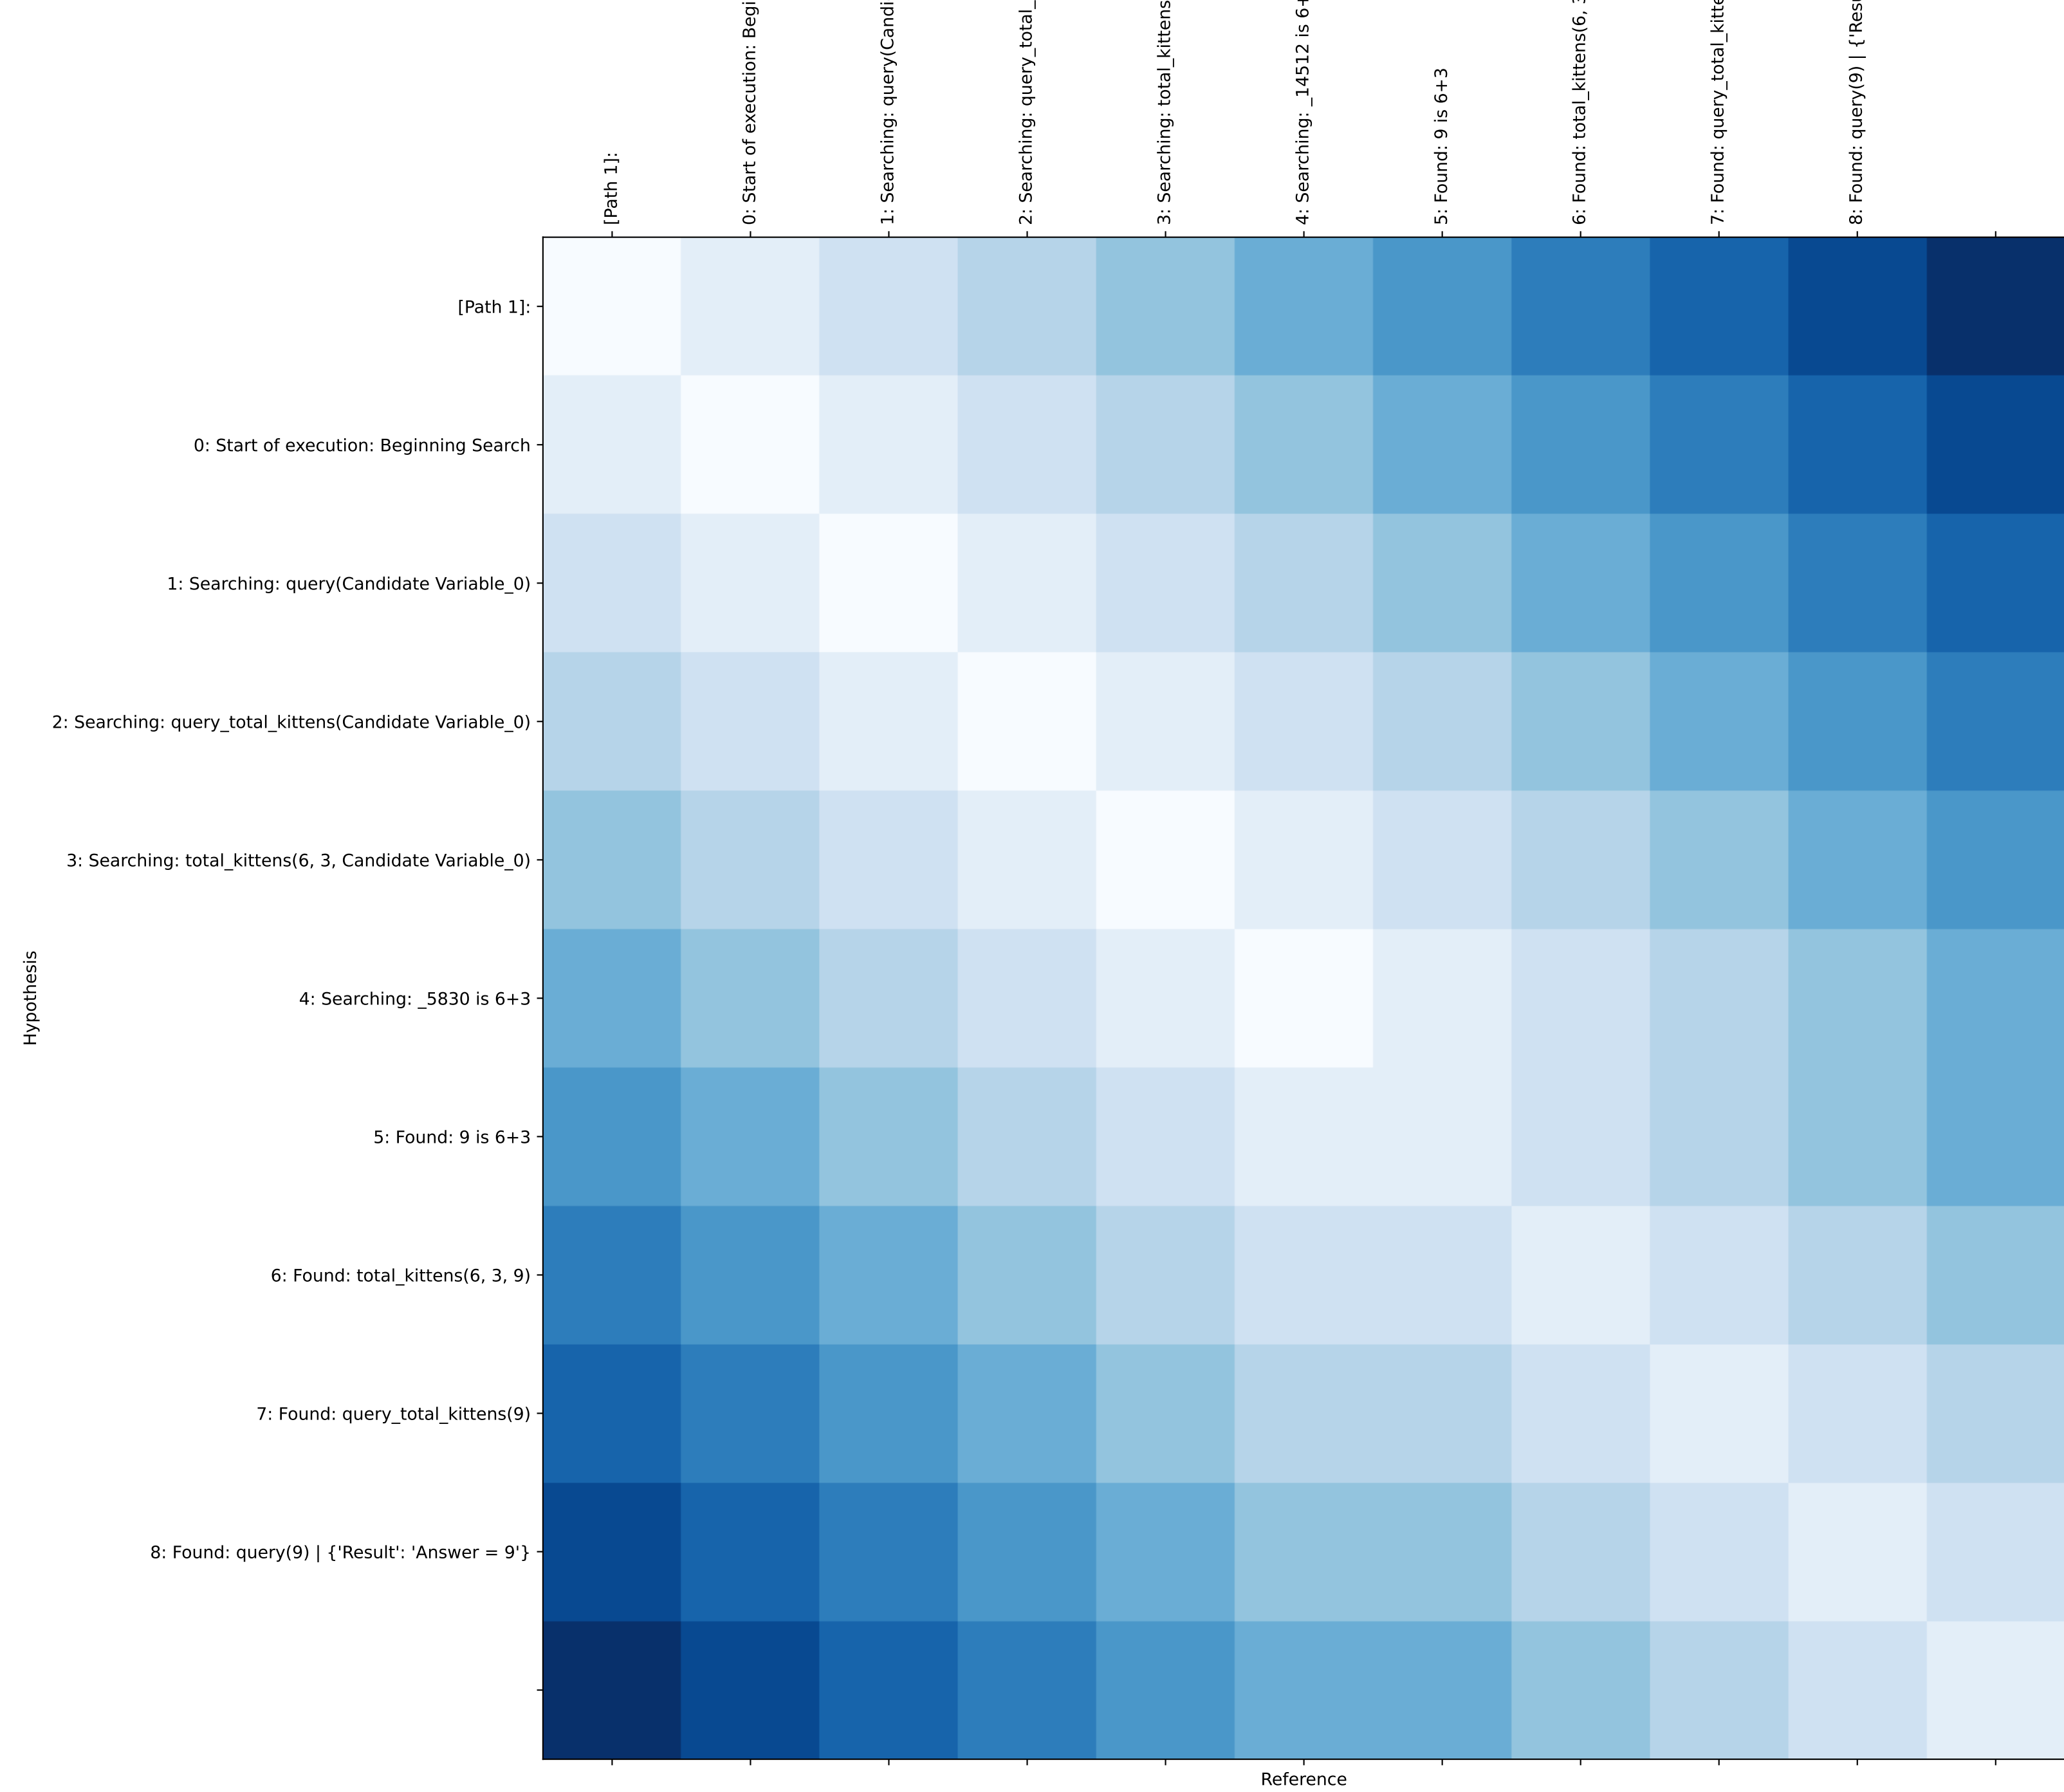

Supplement: supplementary_material [file attachment]

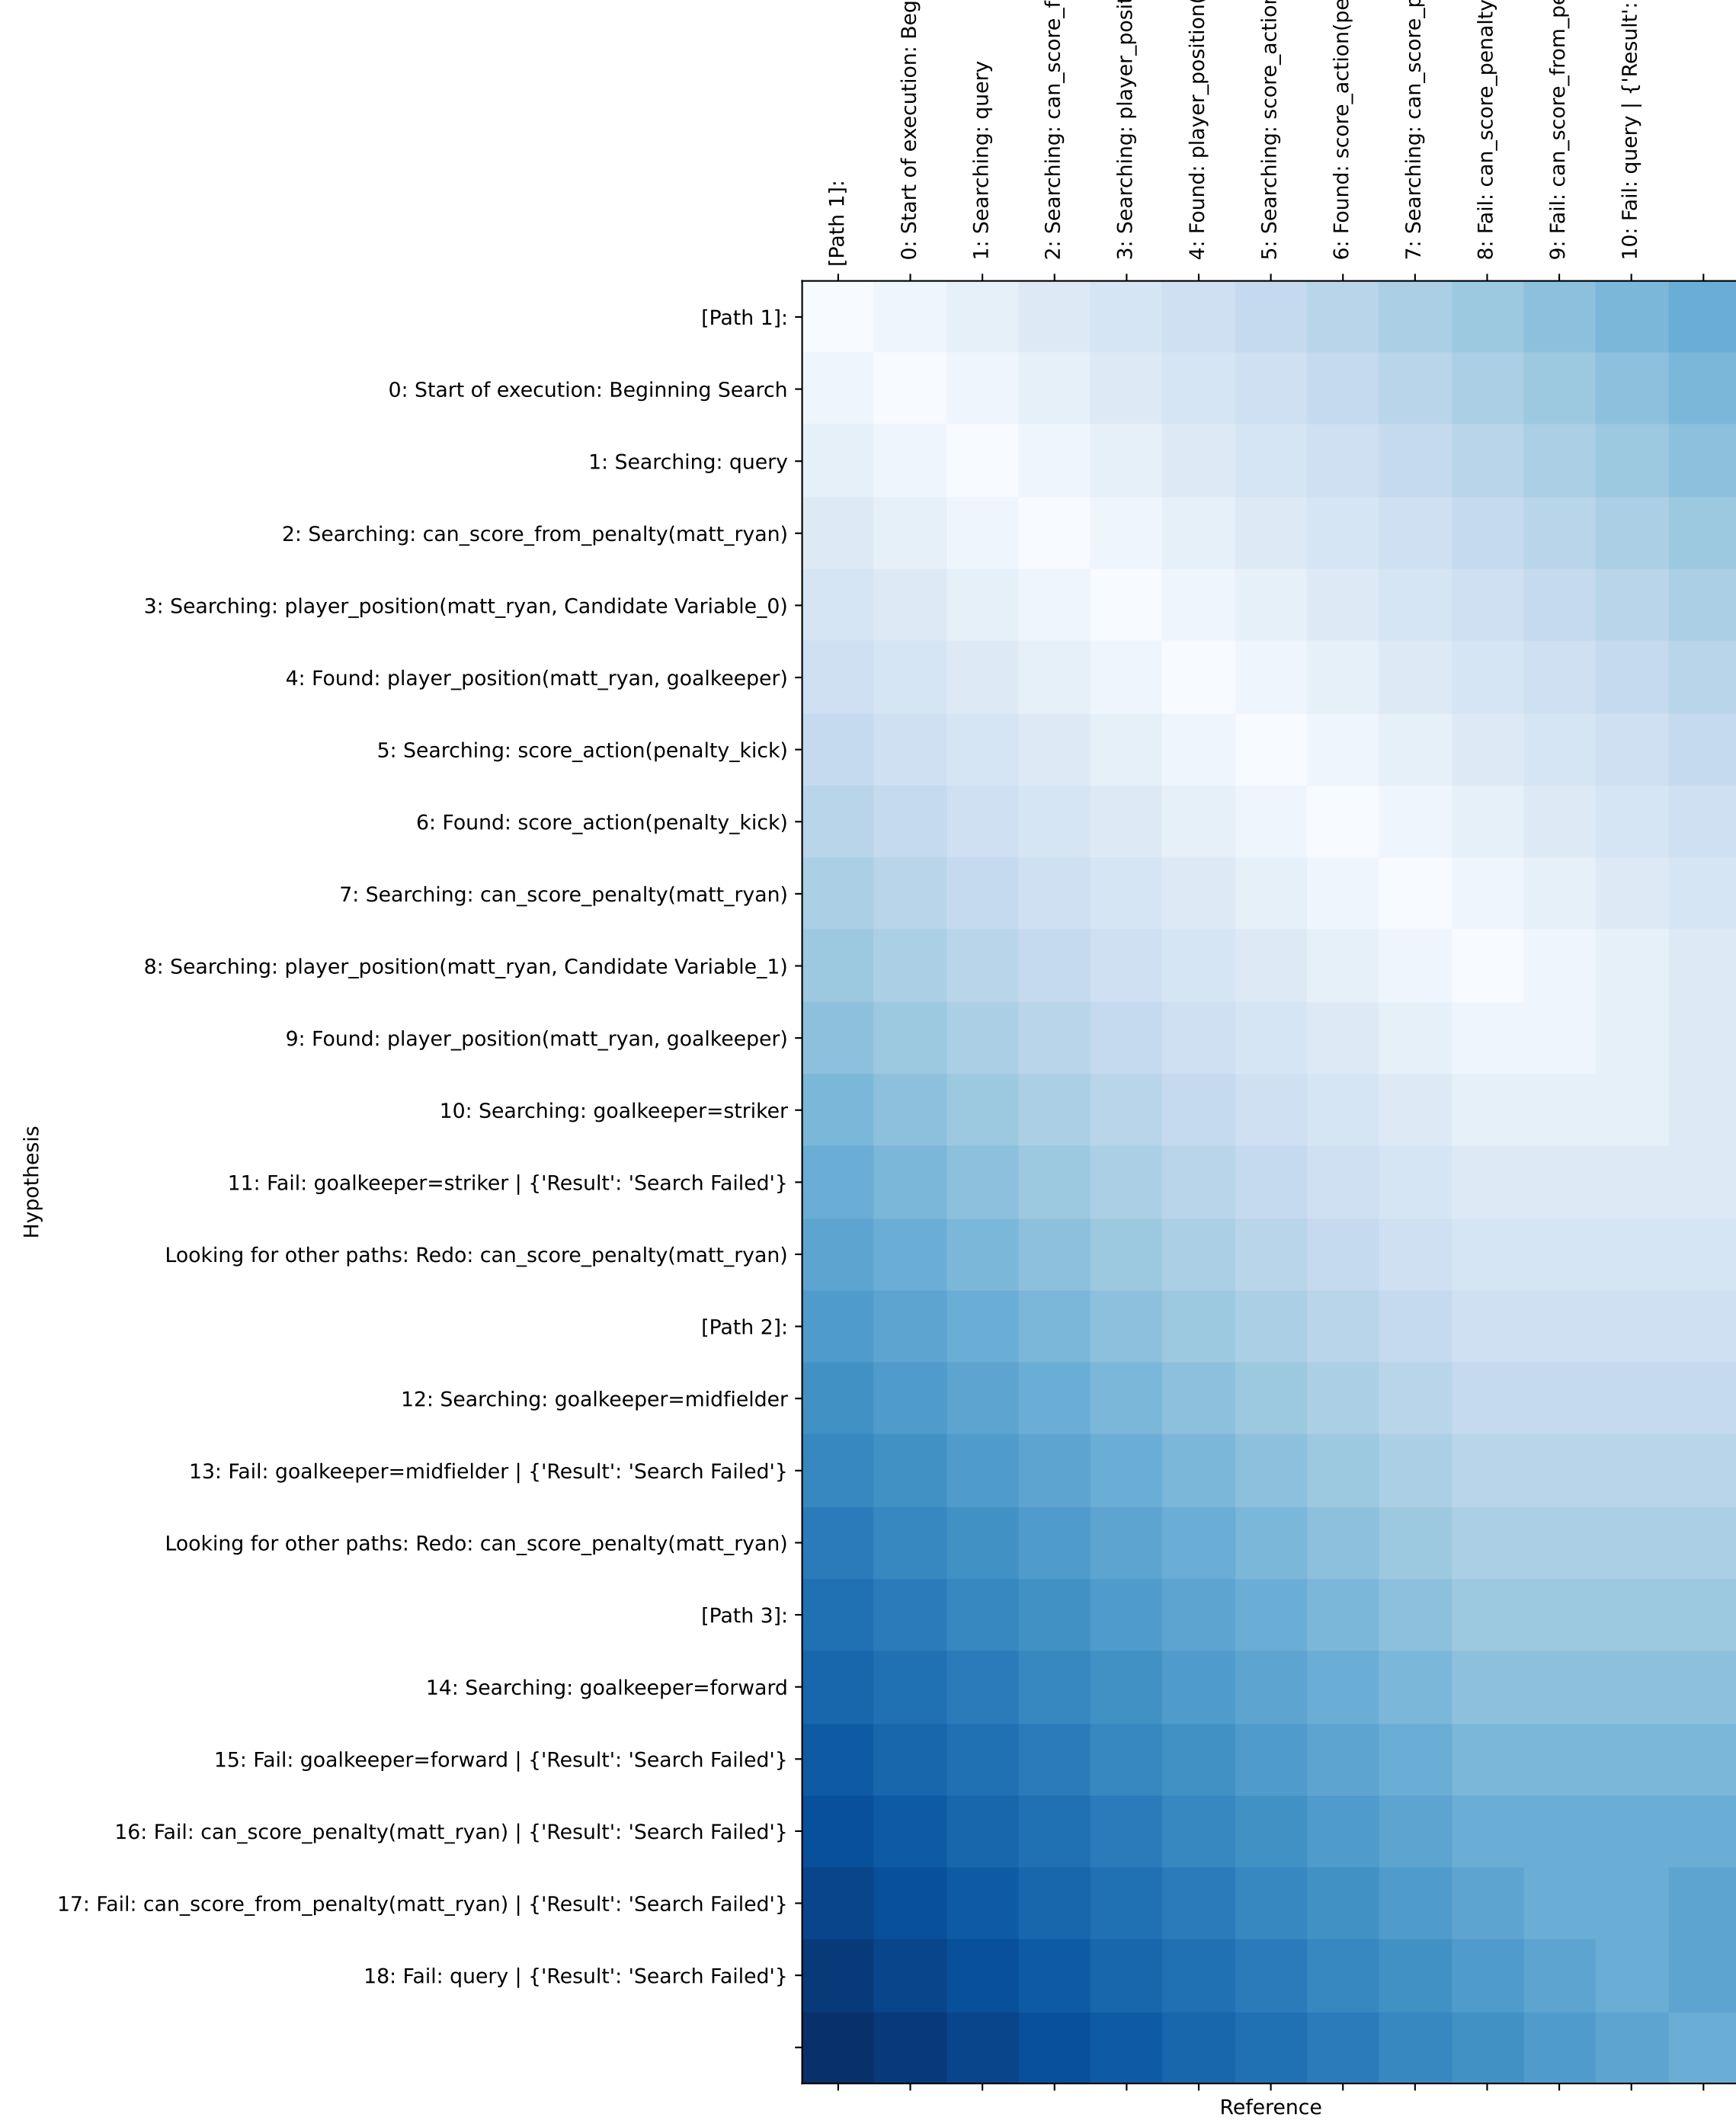

Supplement: supplementary_material [file attachment]

Hypothesis

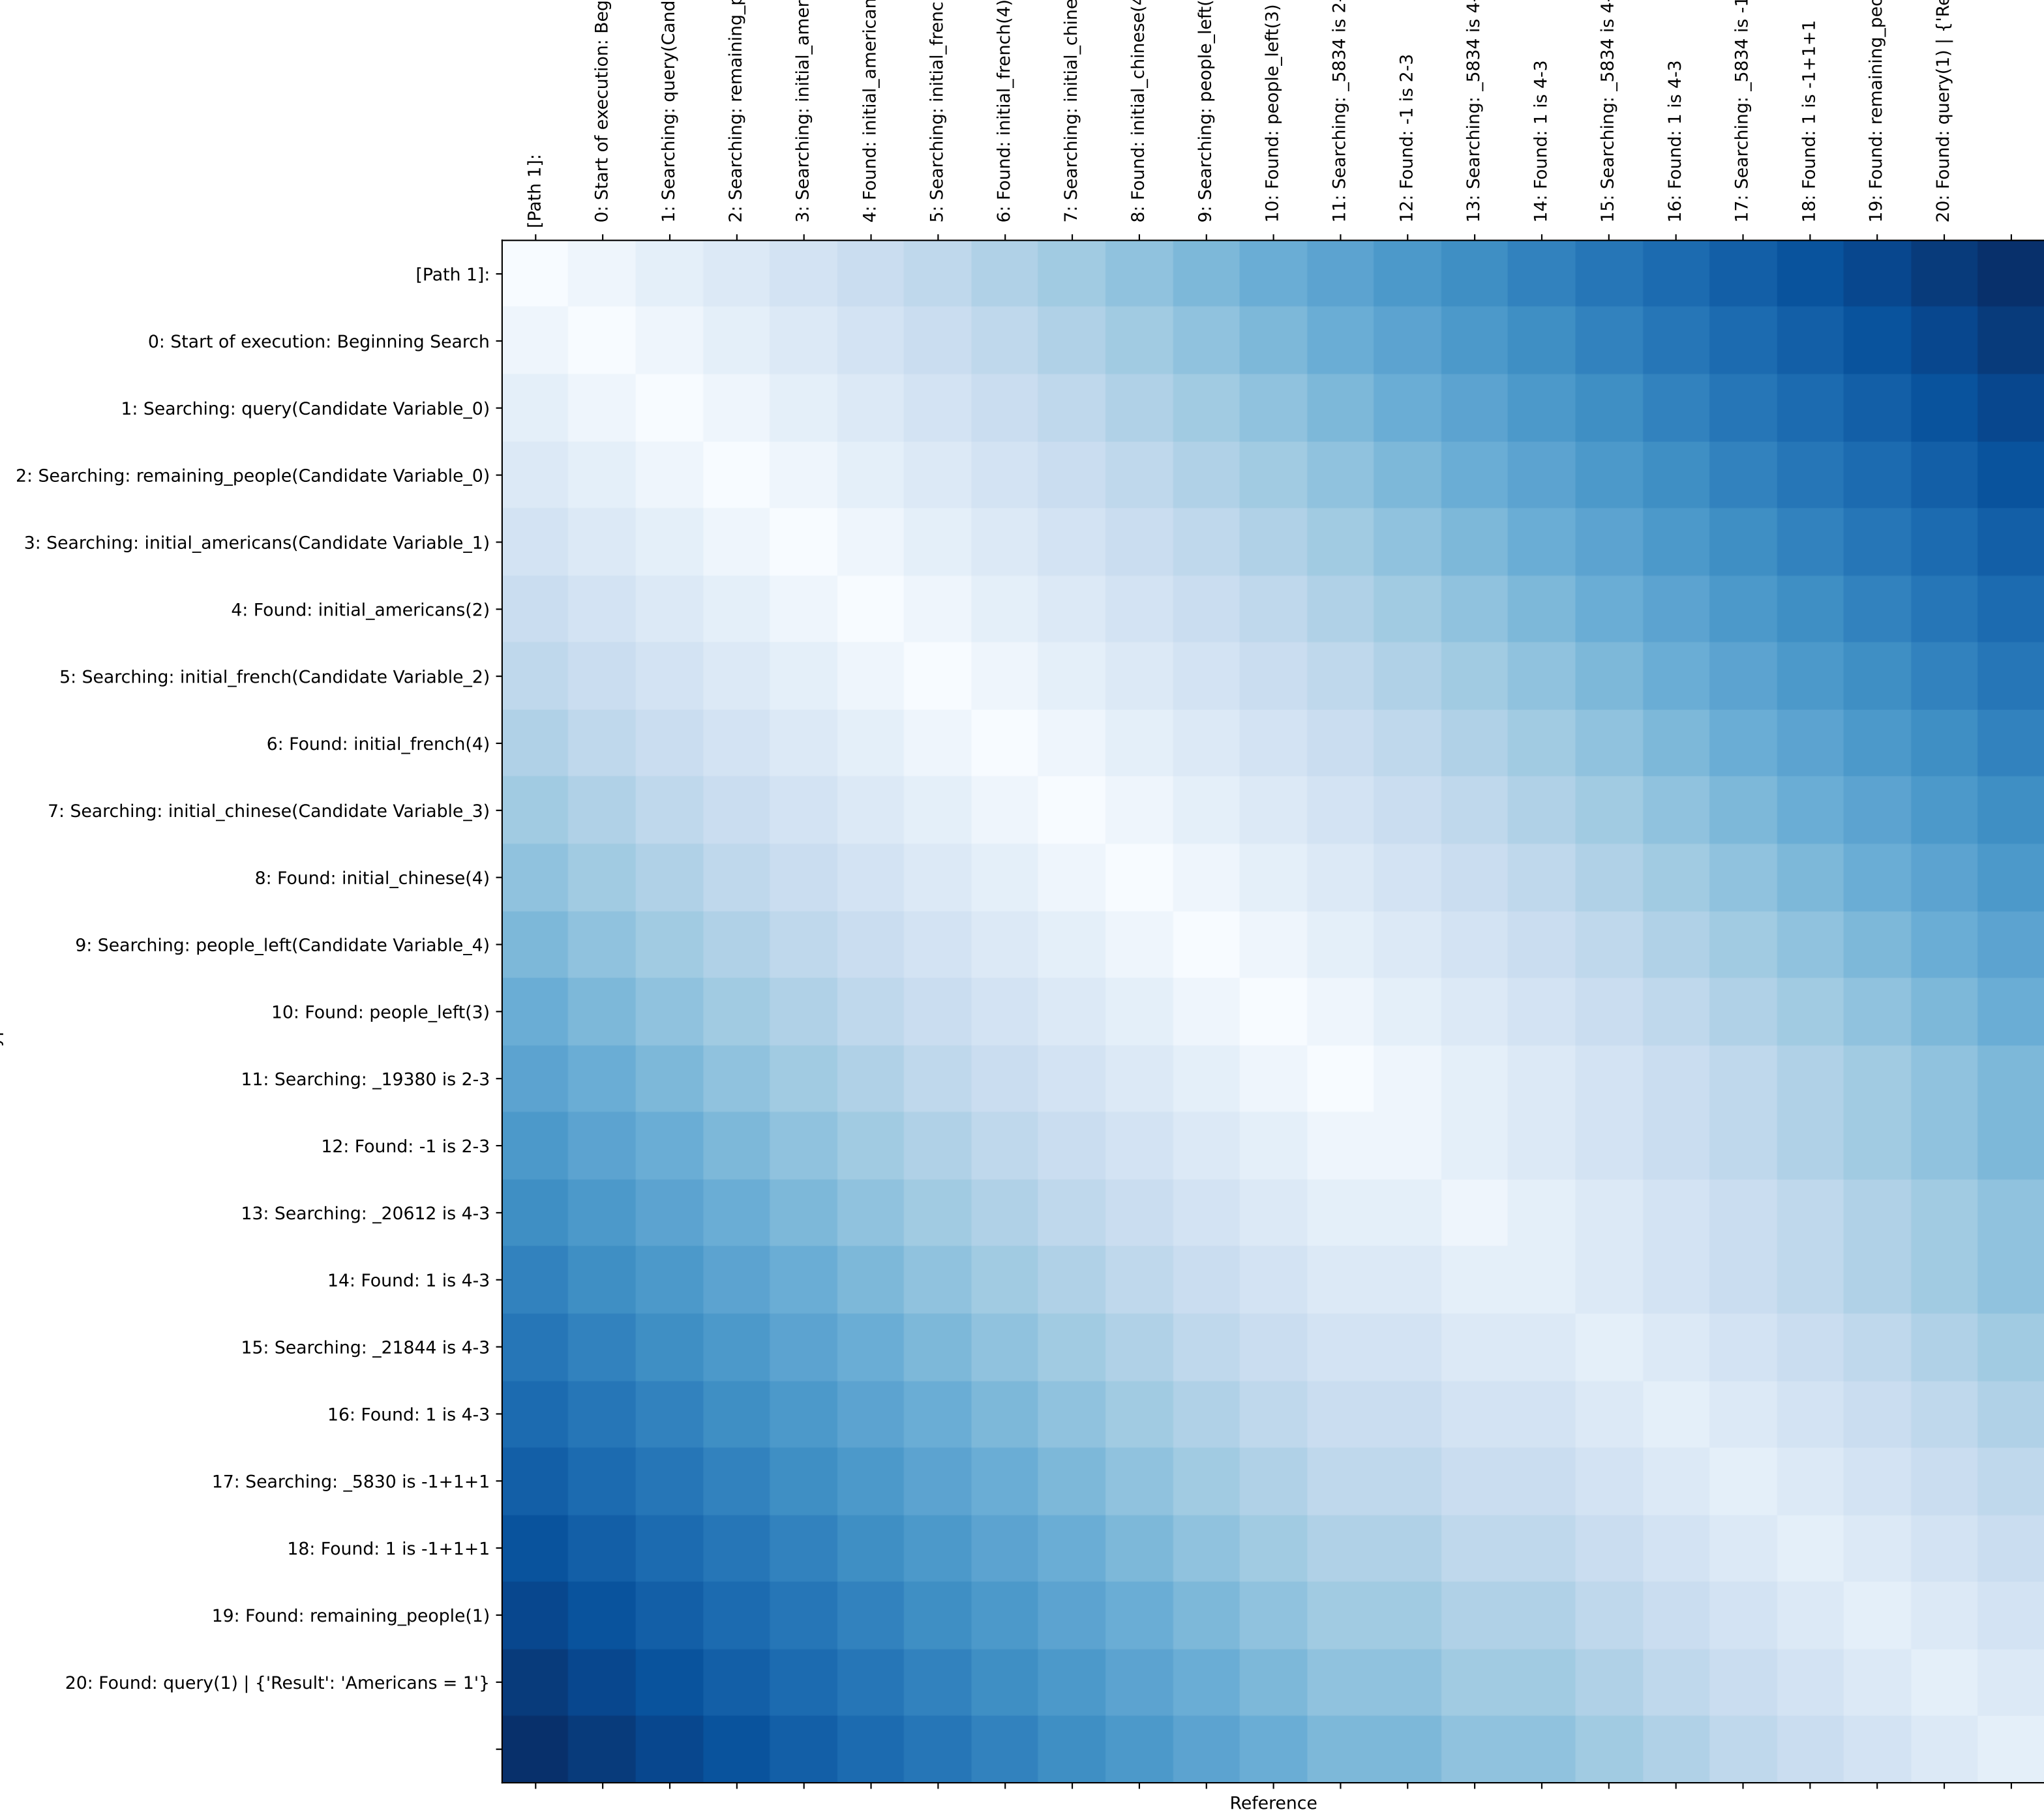

Supplement: supplementary_material [file attachment]

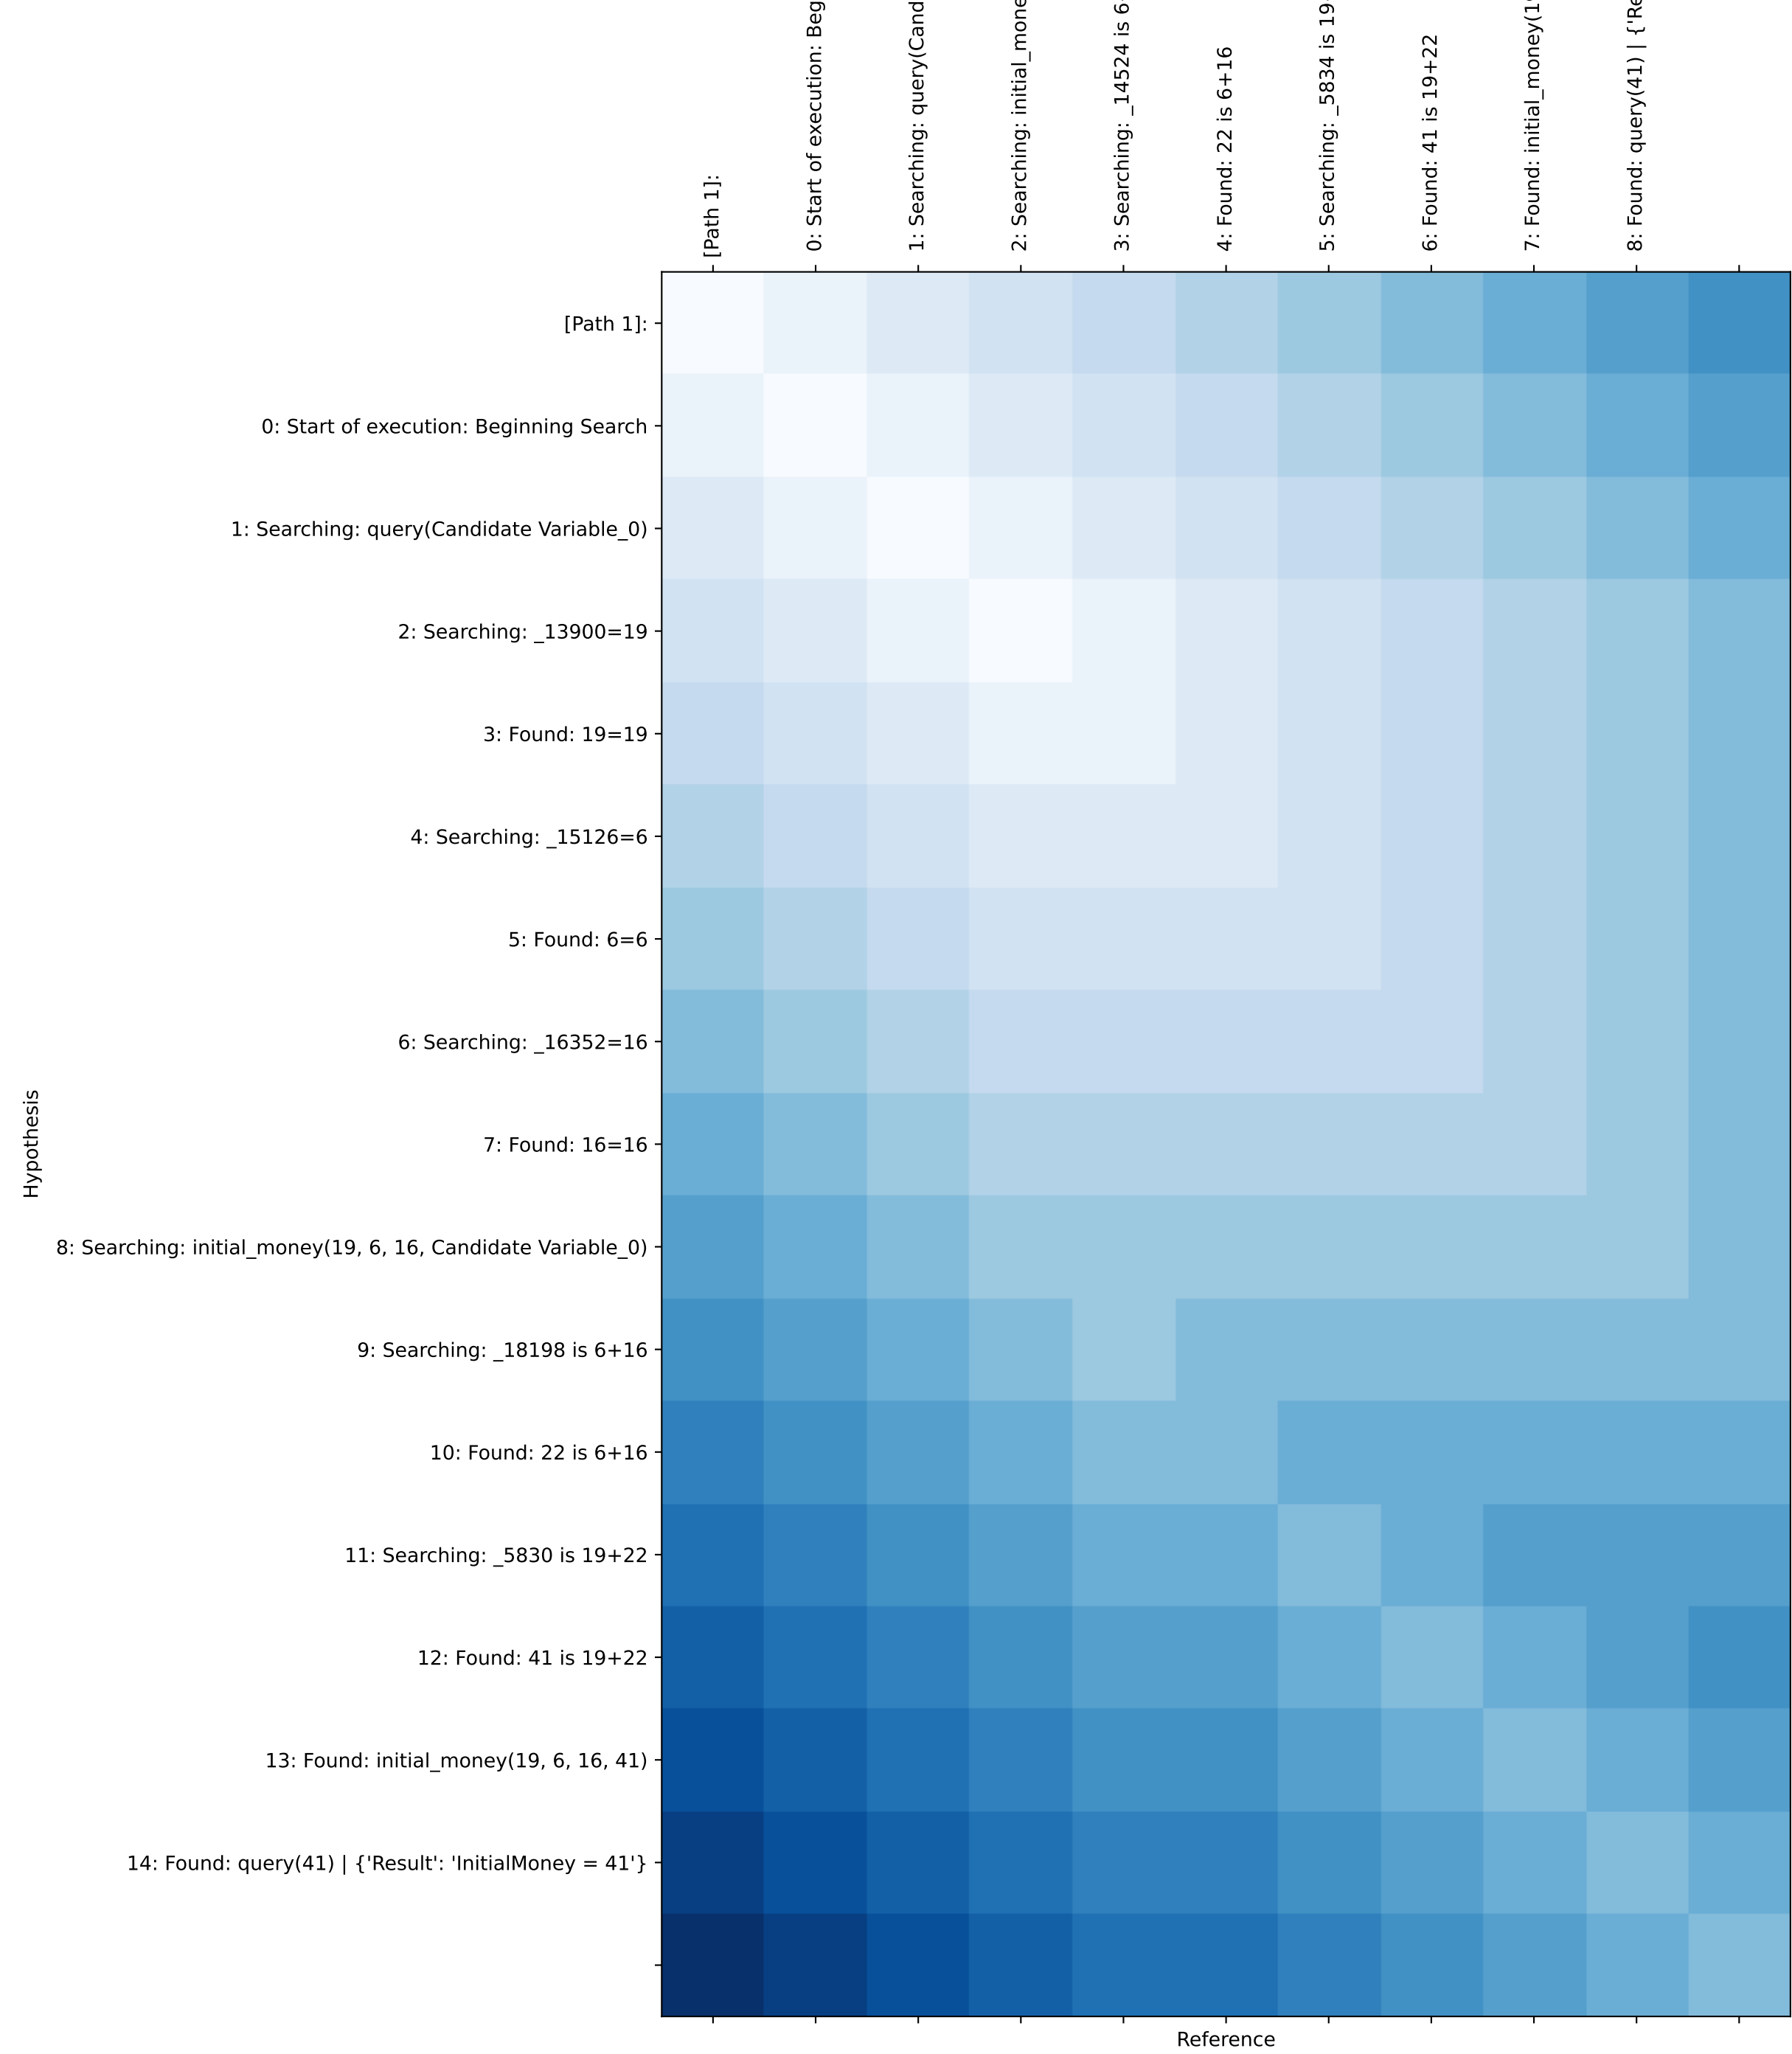

Supplement: supplementary_material [file attachment]

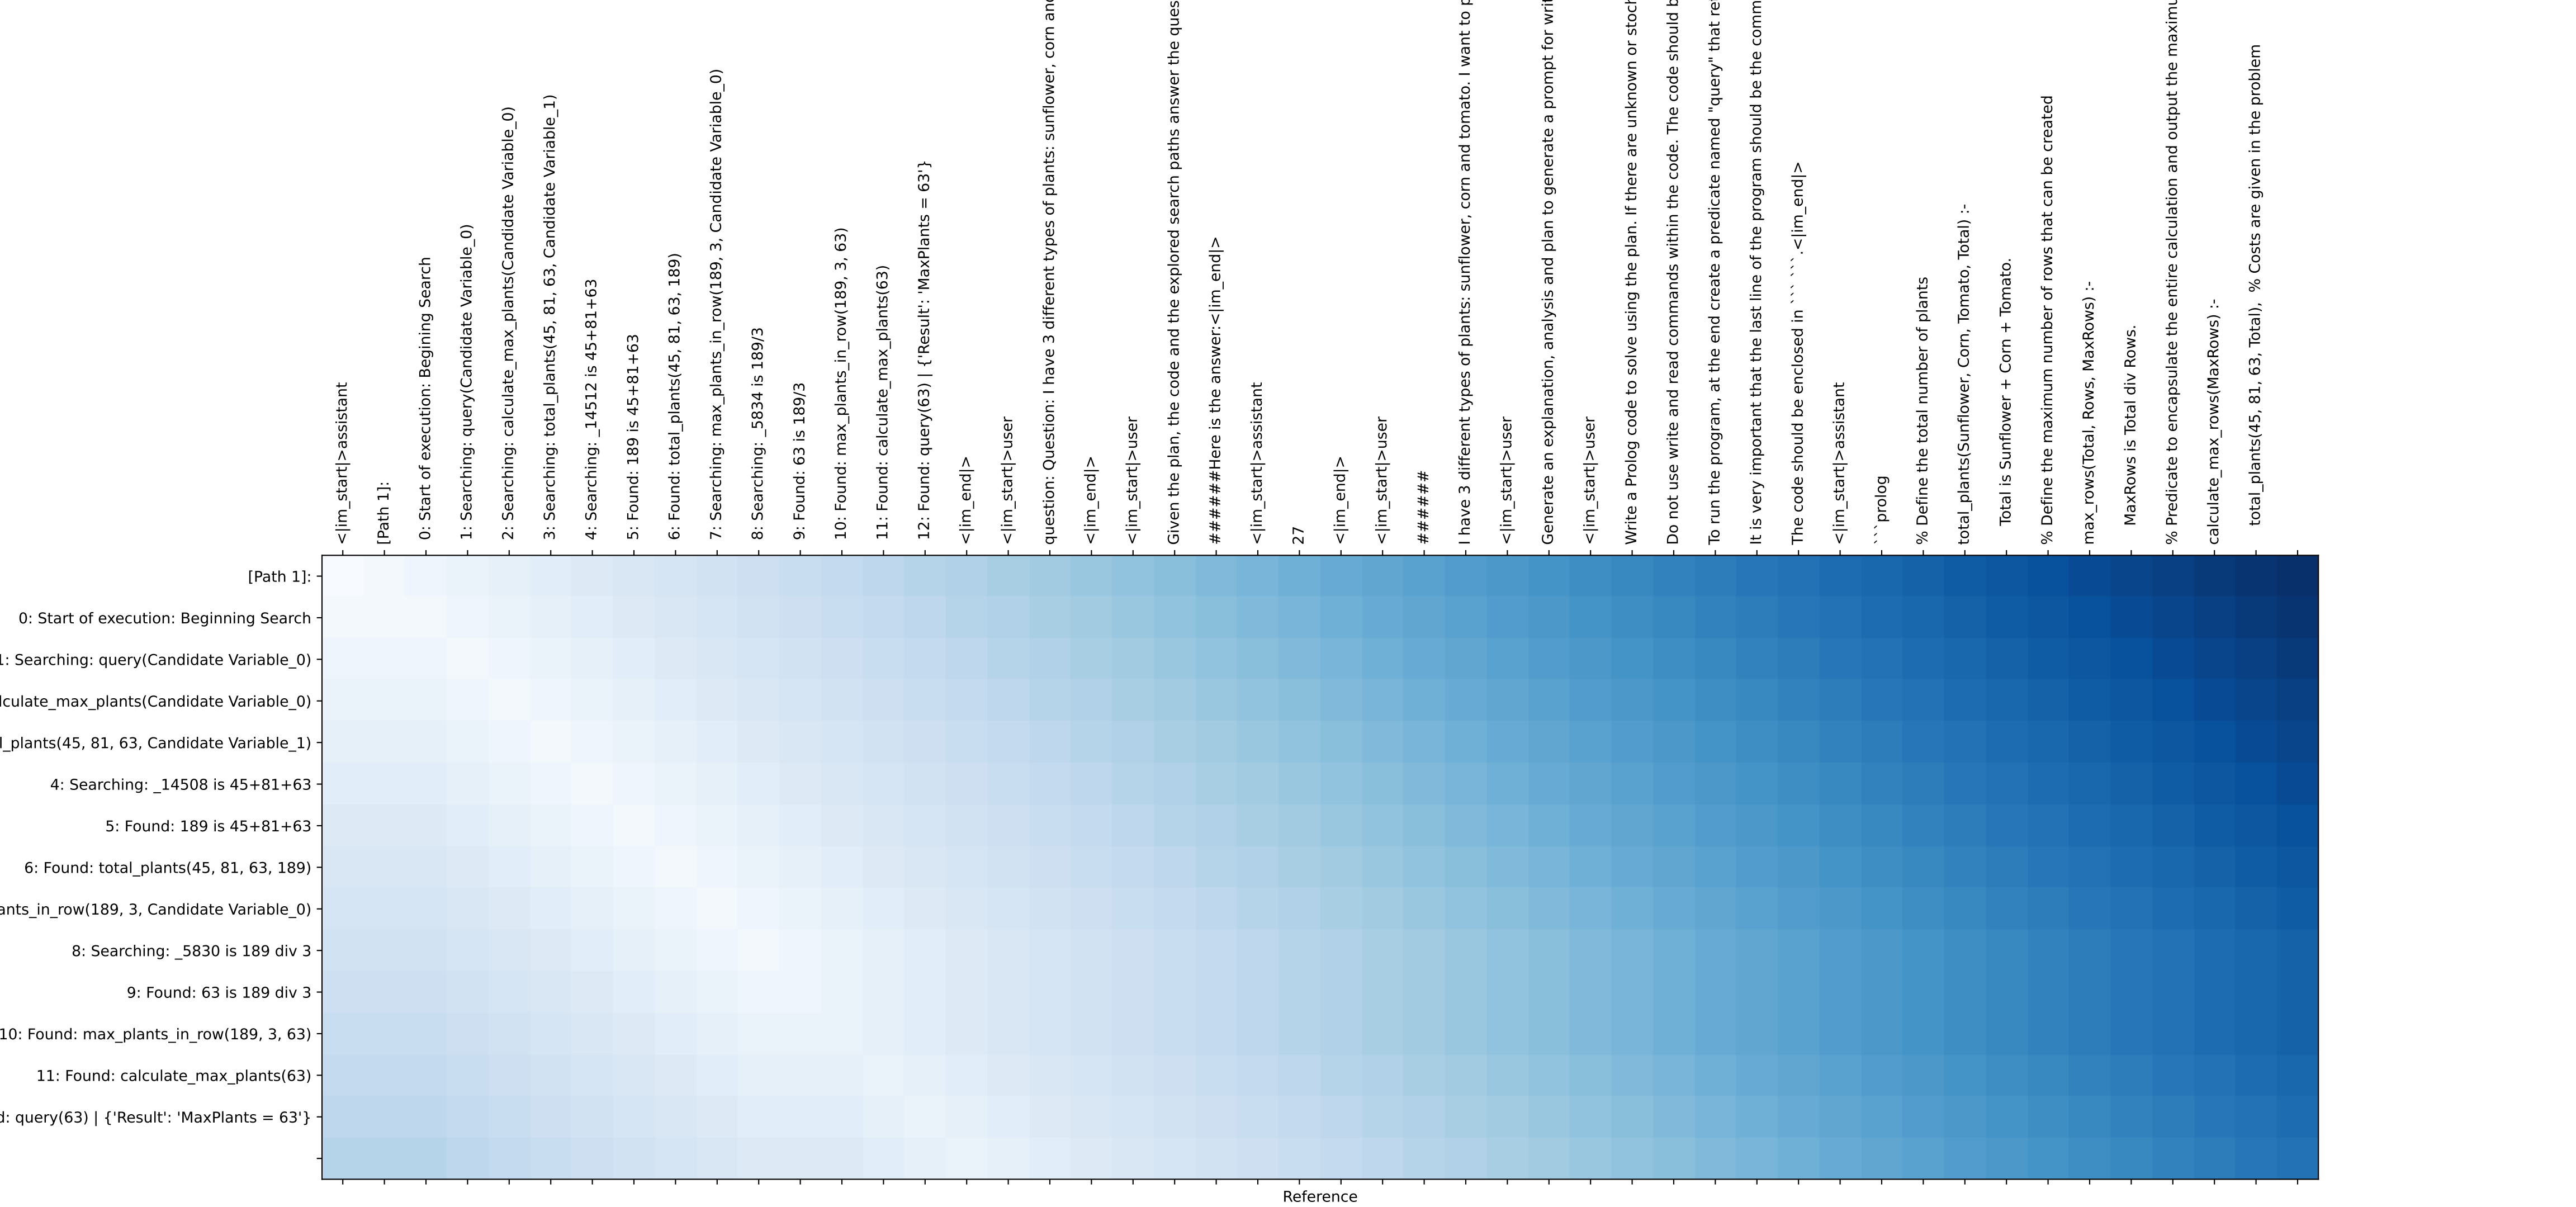

Supplement: supplementary_material [file attachment]

Hypothesis

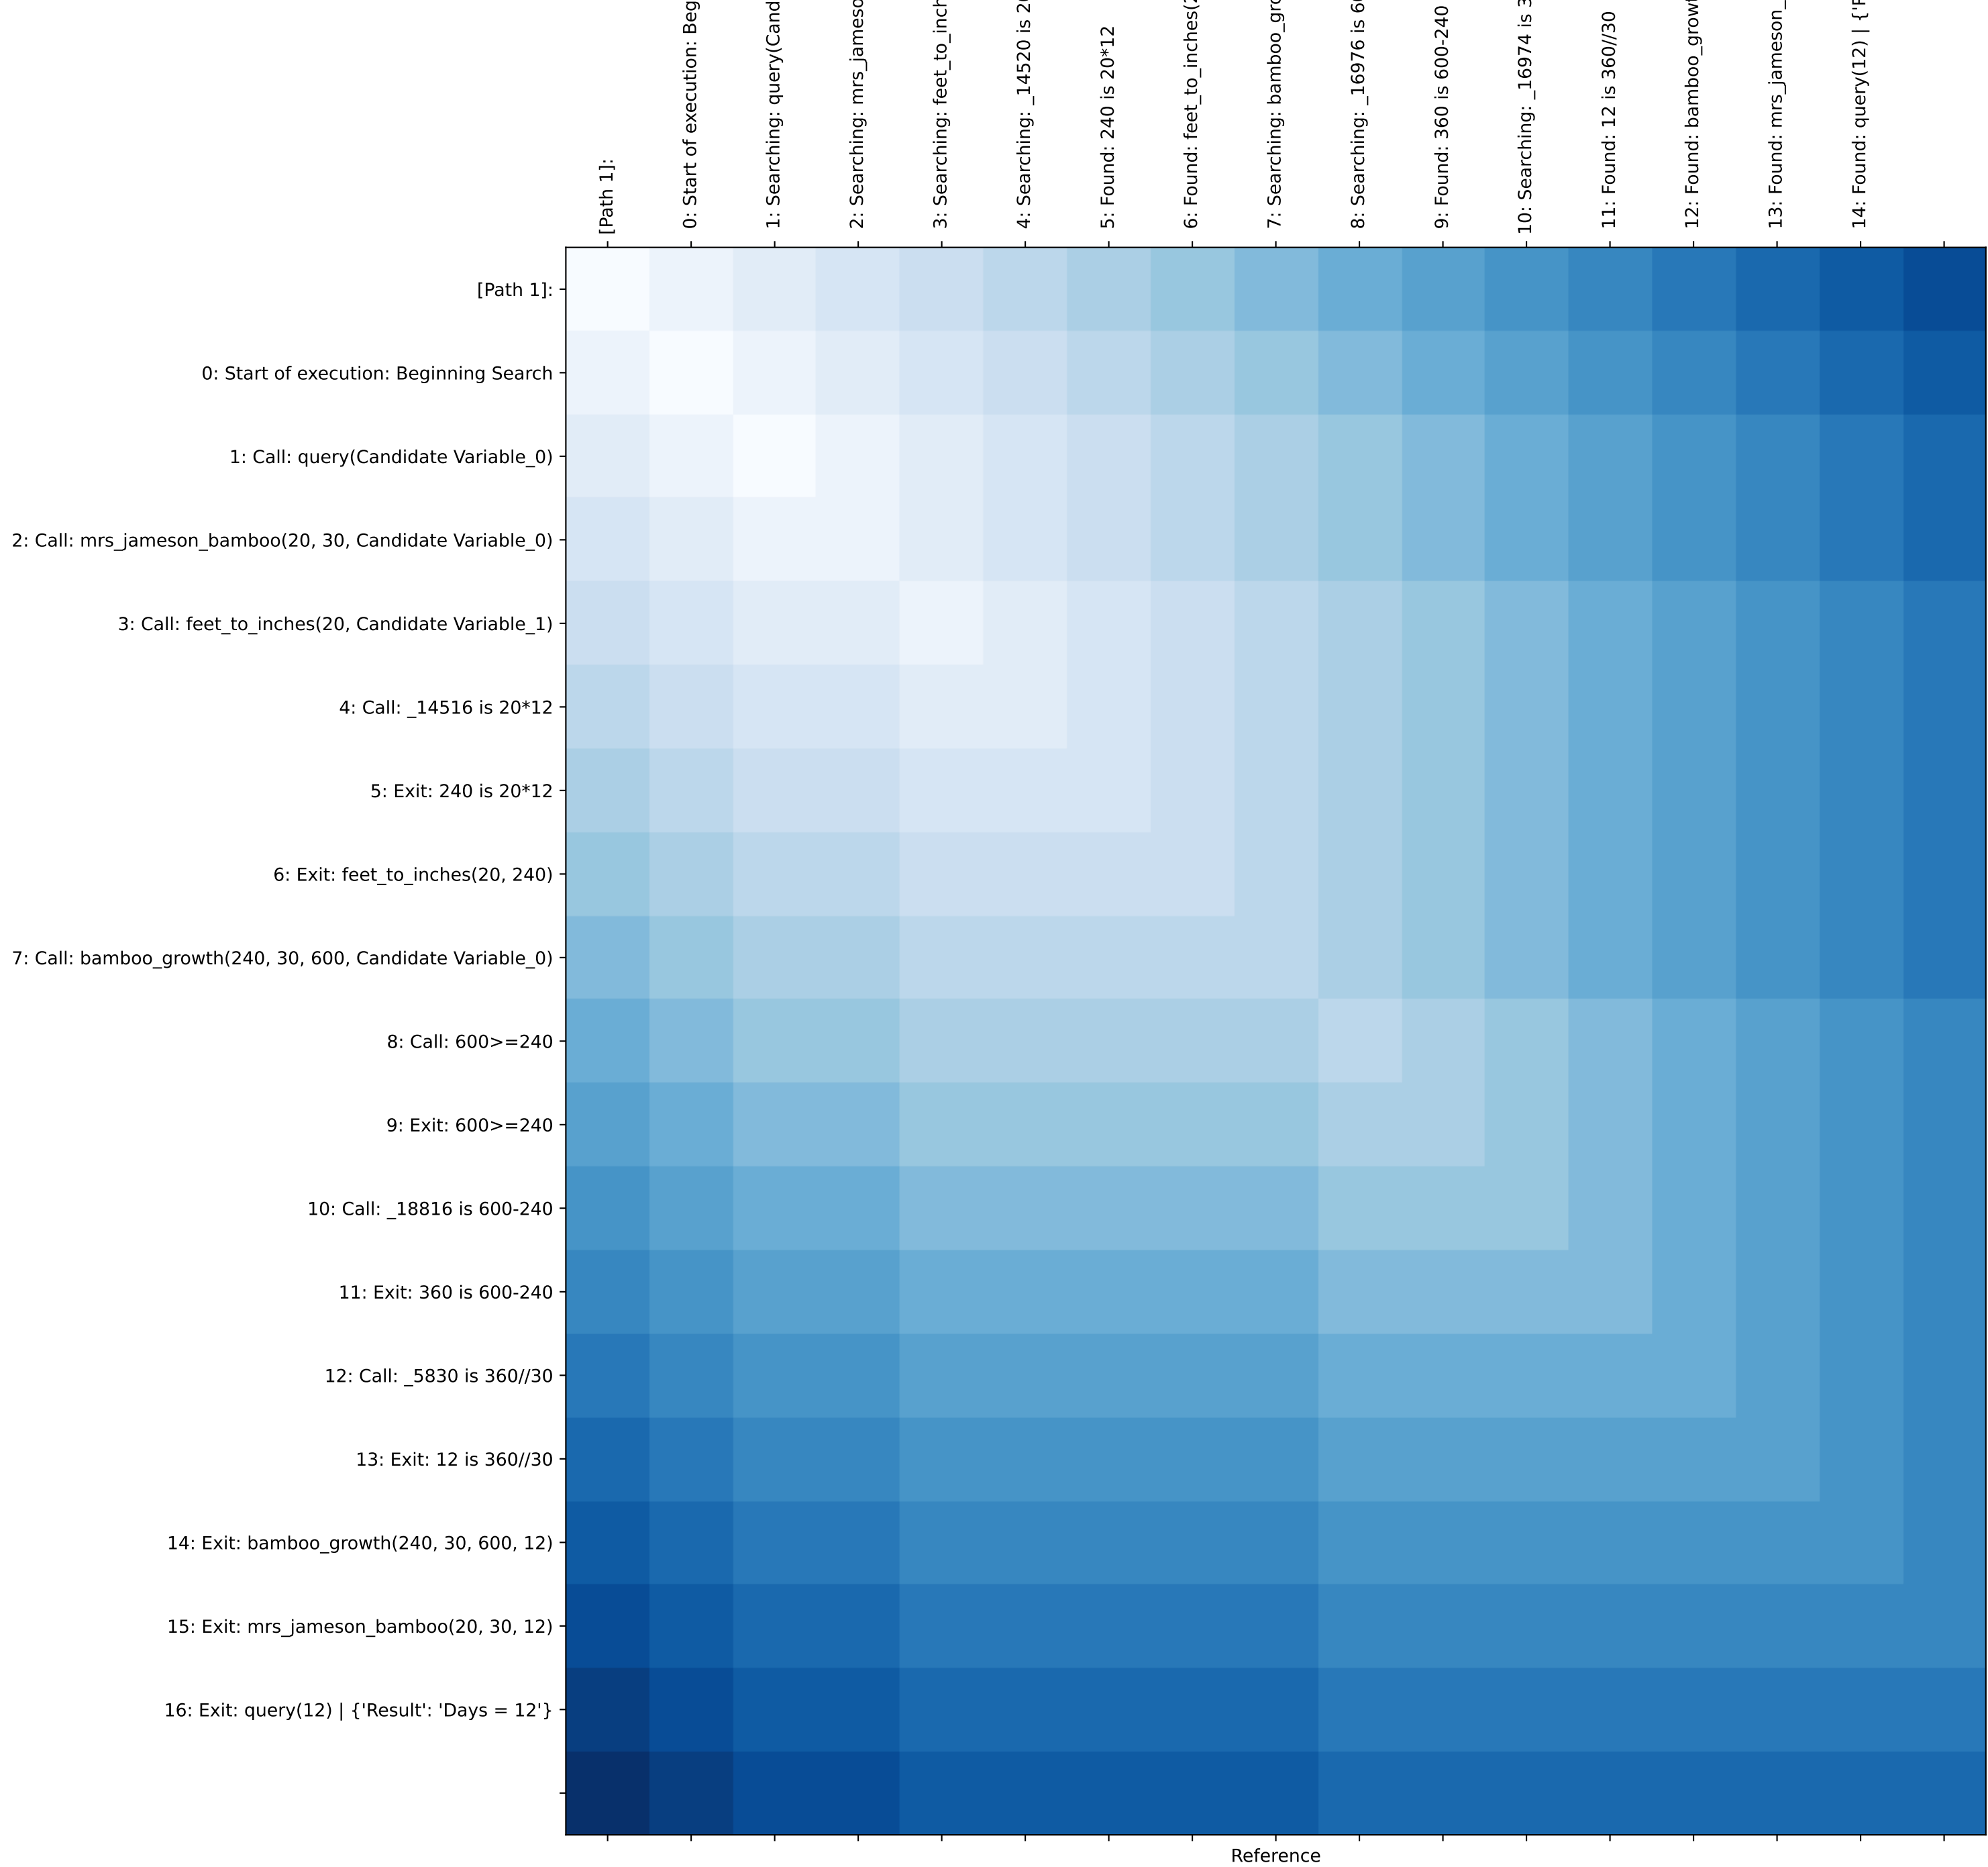

Supplement: supplementary_material [file attachment]

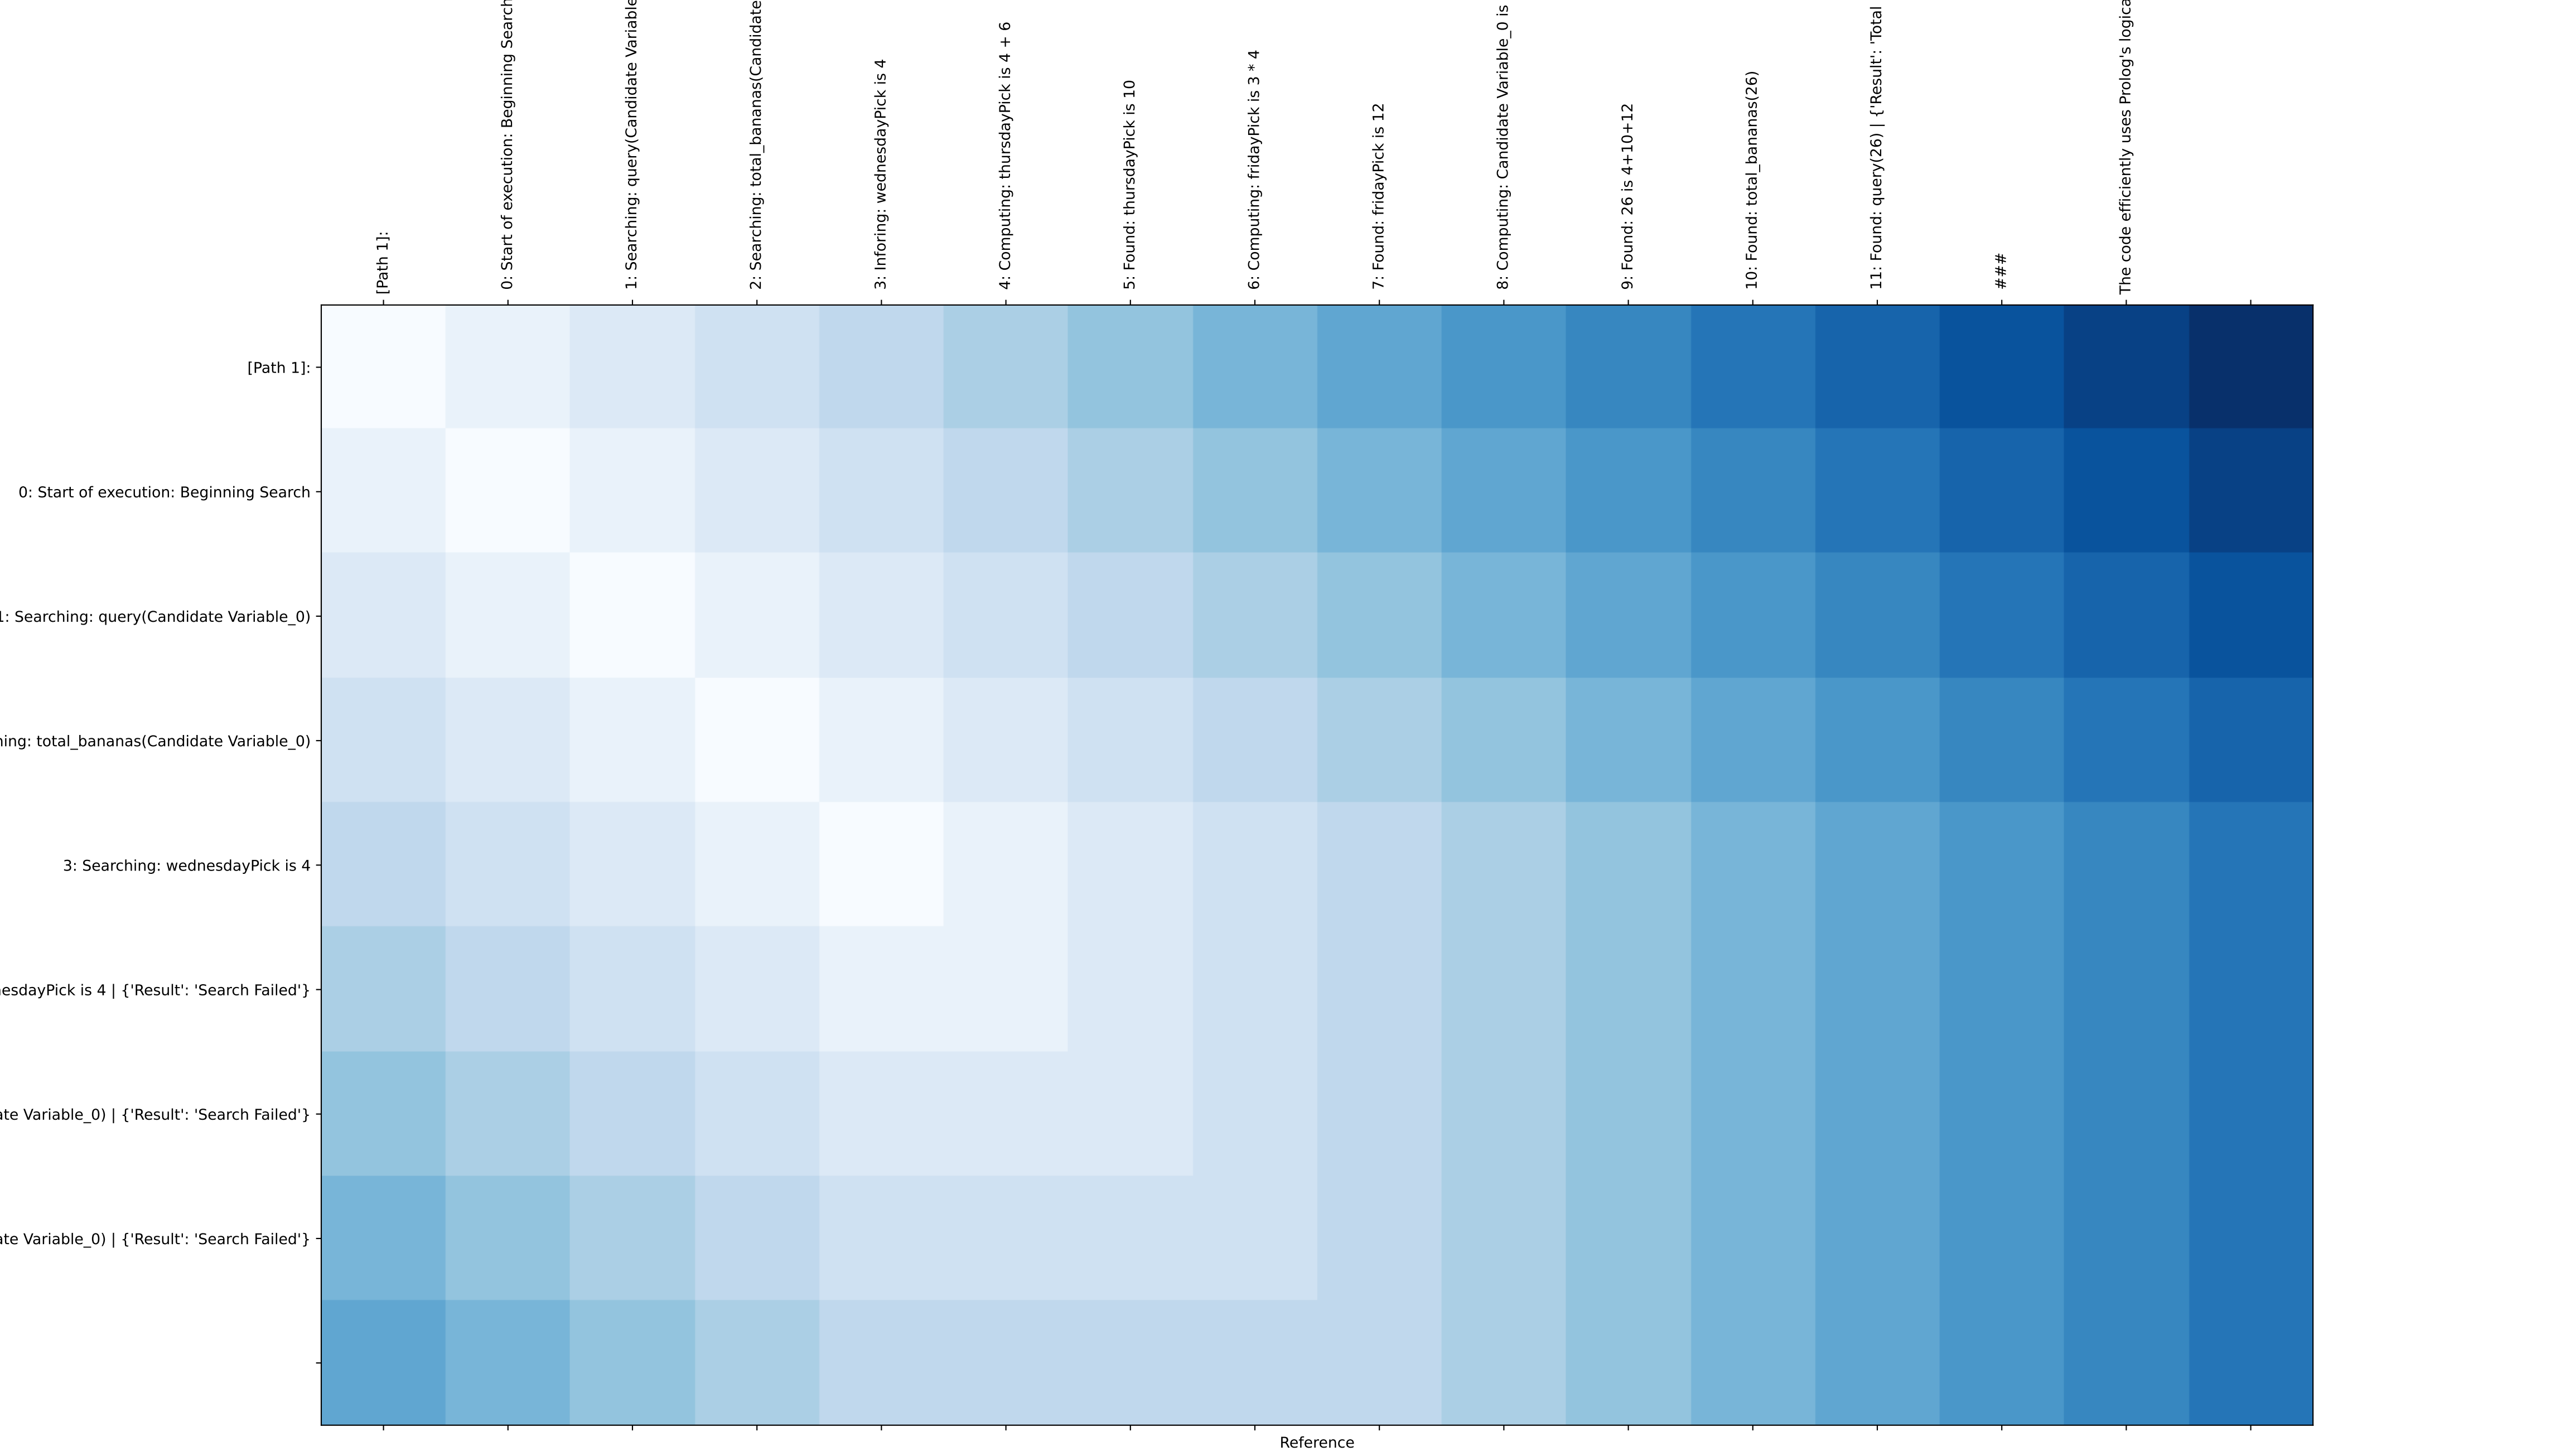

Supplement: supplementary_material [file attachment]

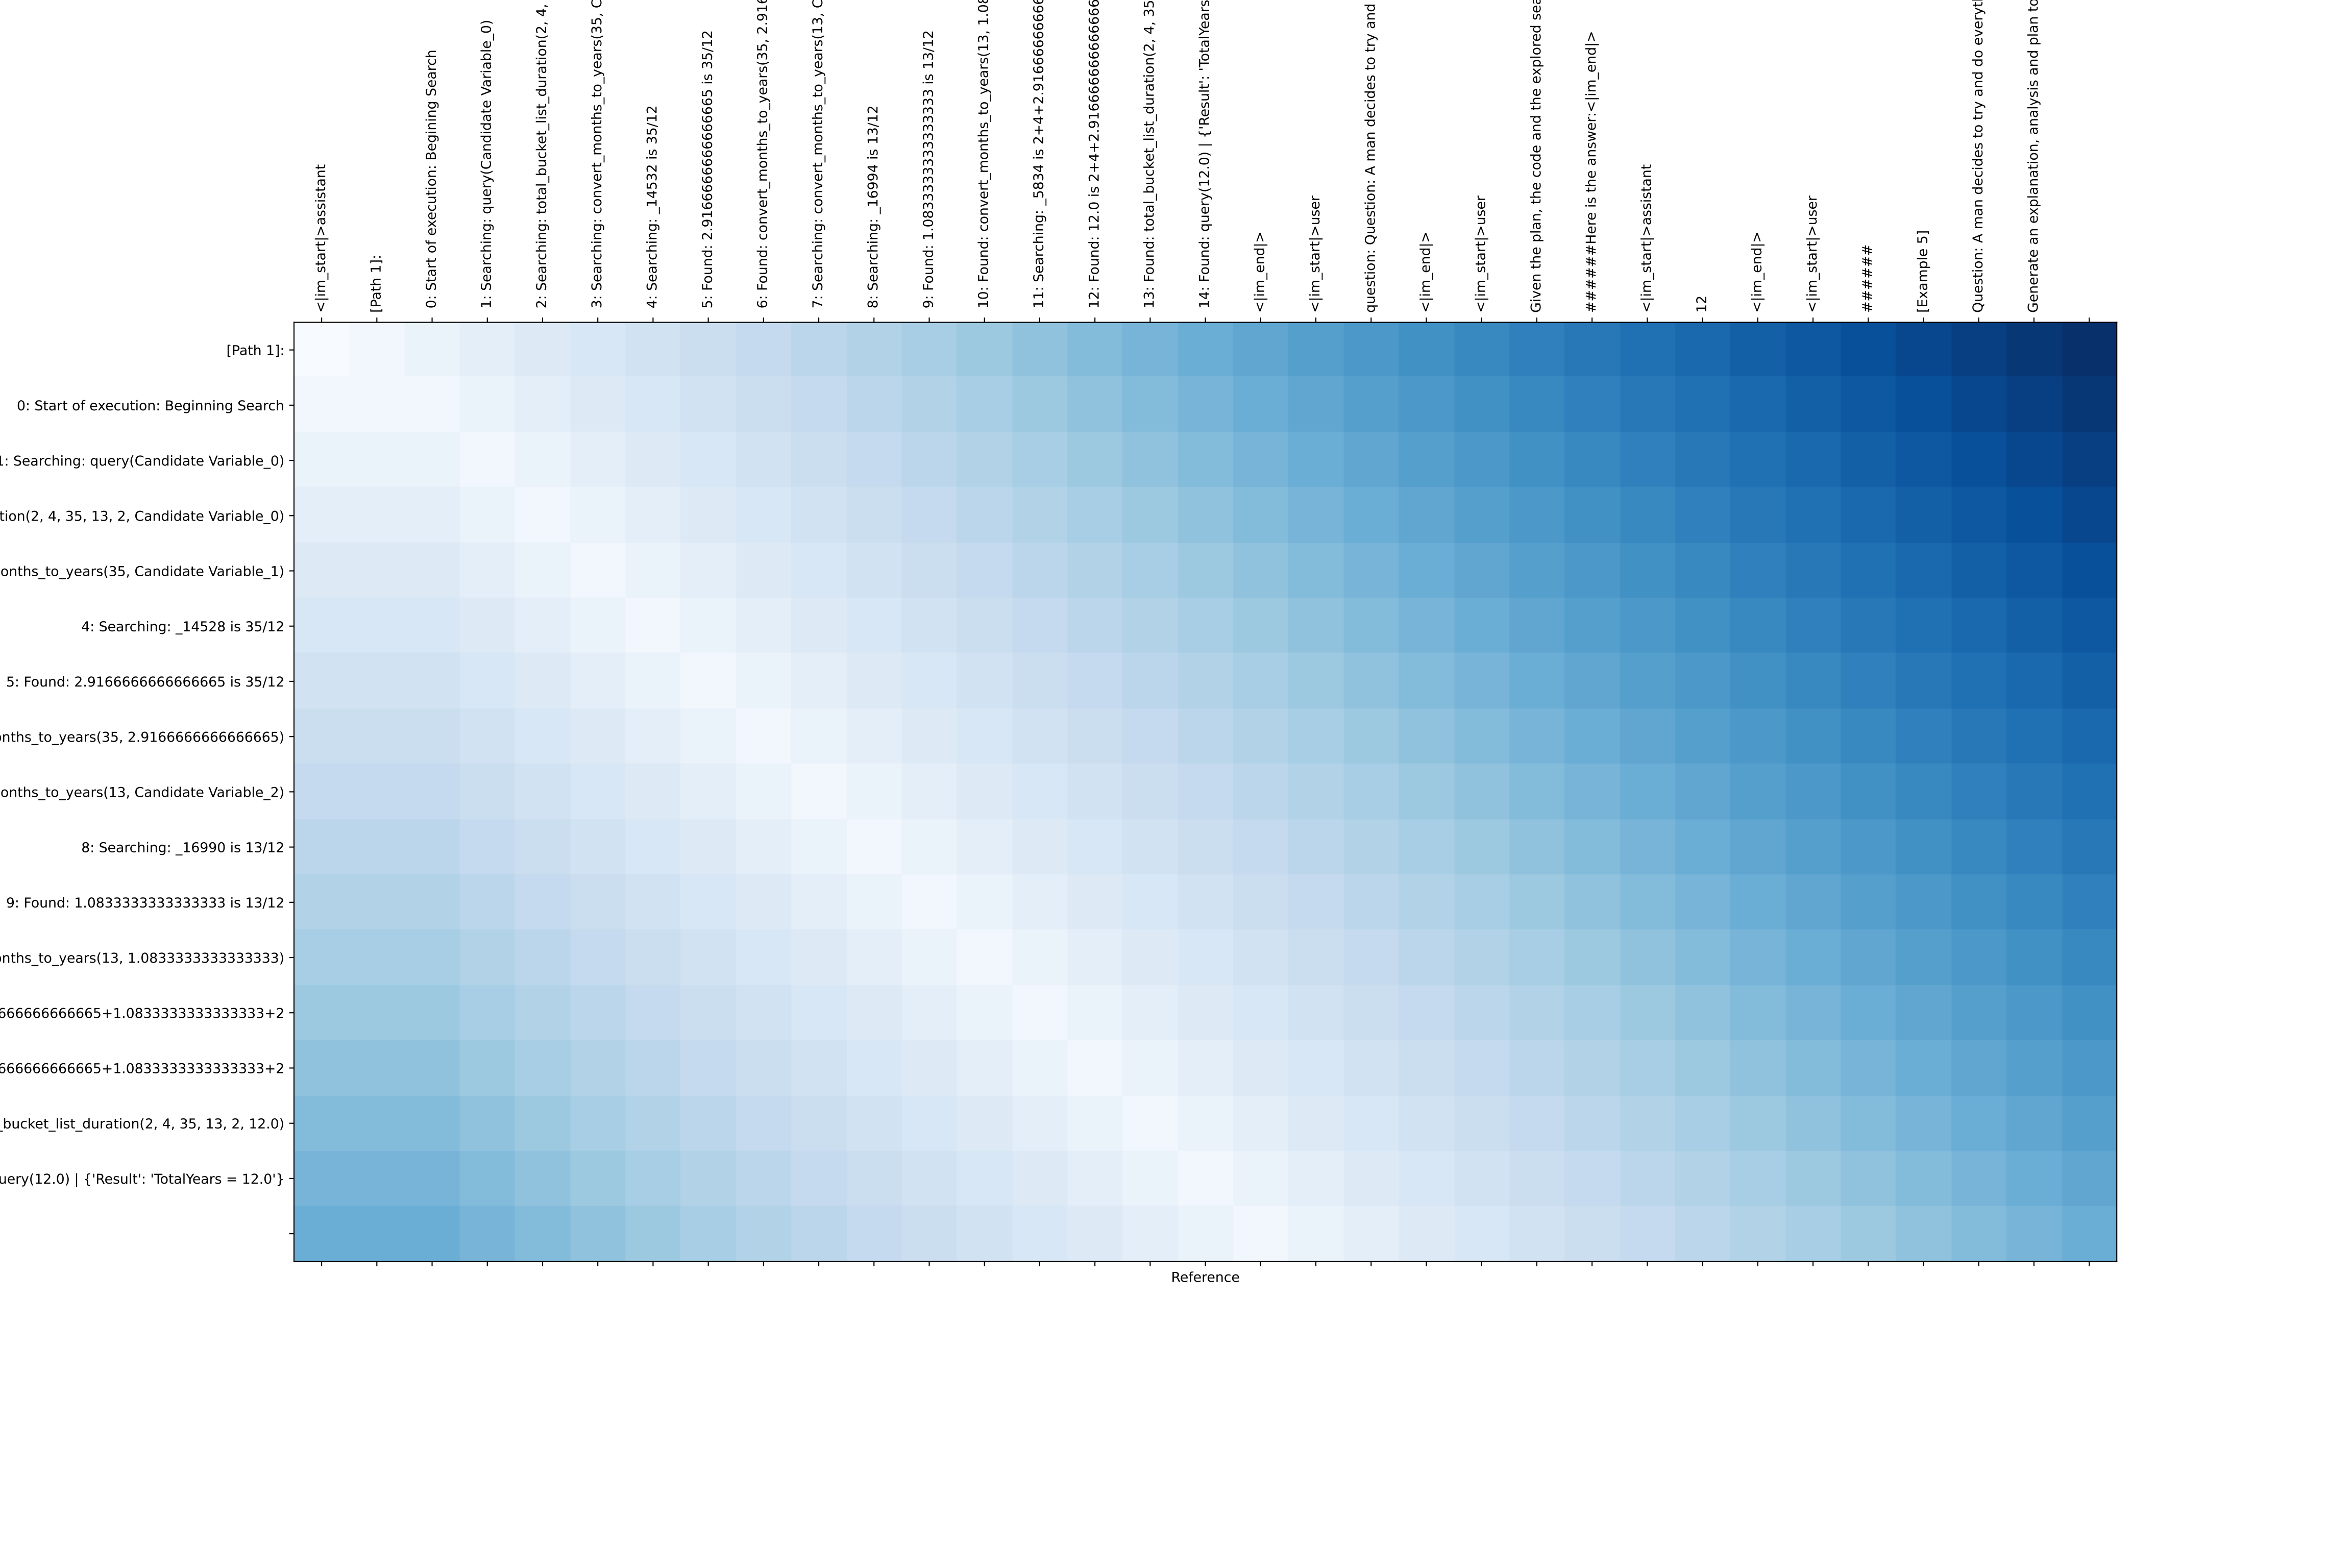

Supplement: supplementary_material [file attachment]

Hypothesis

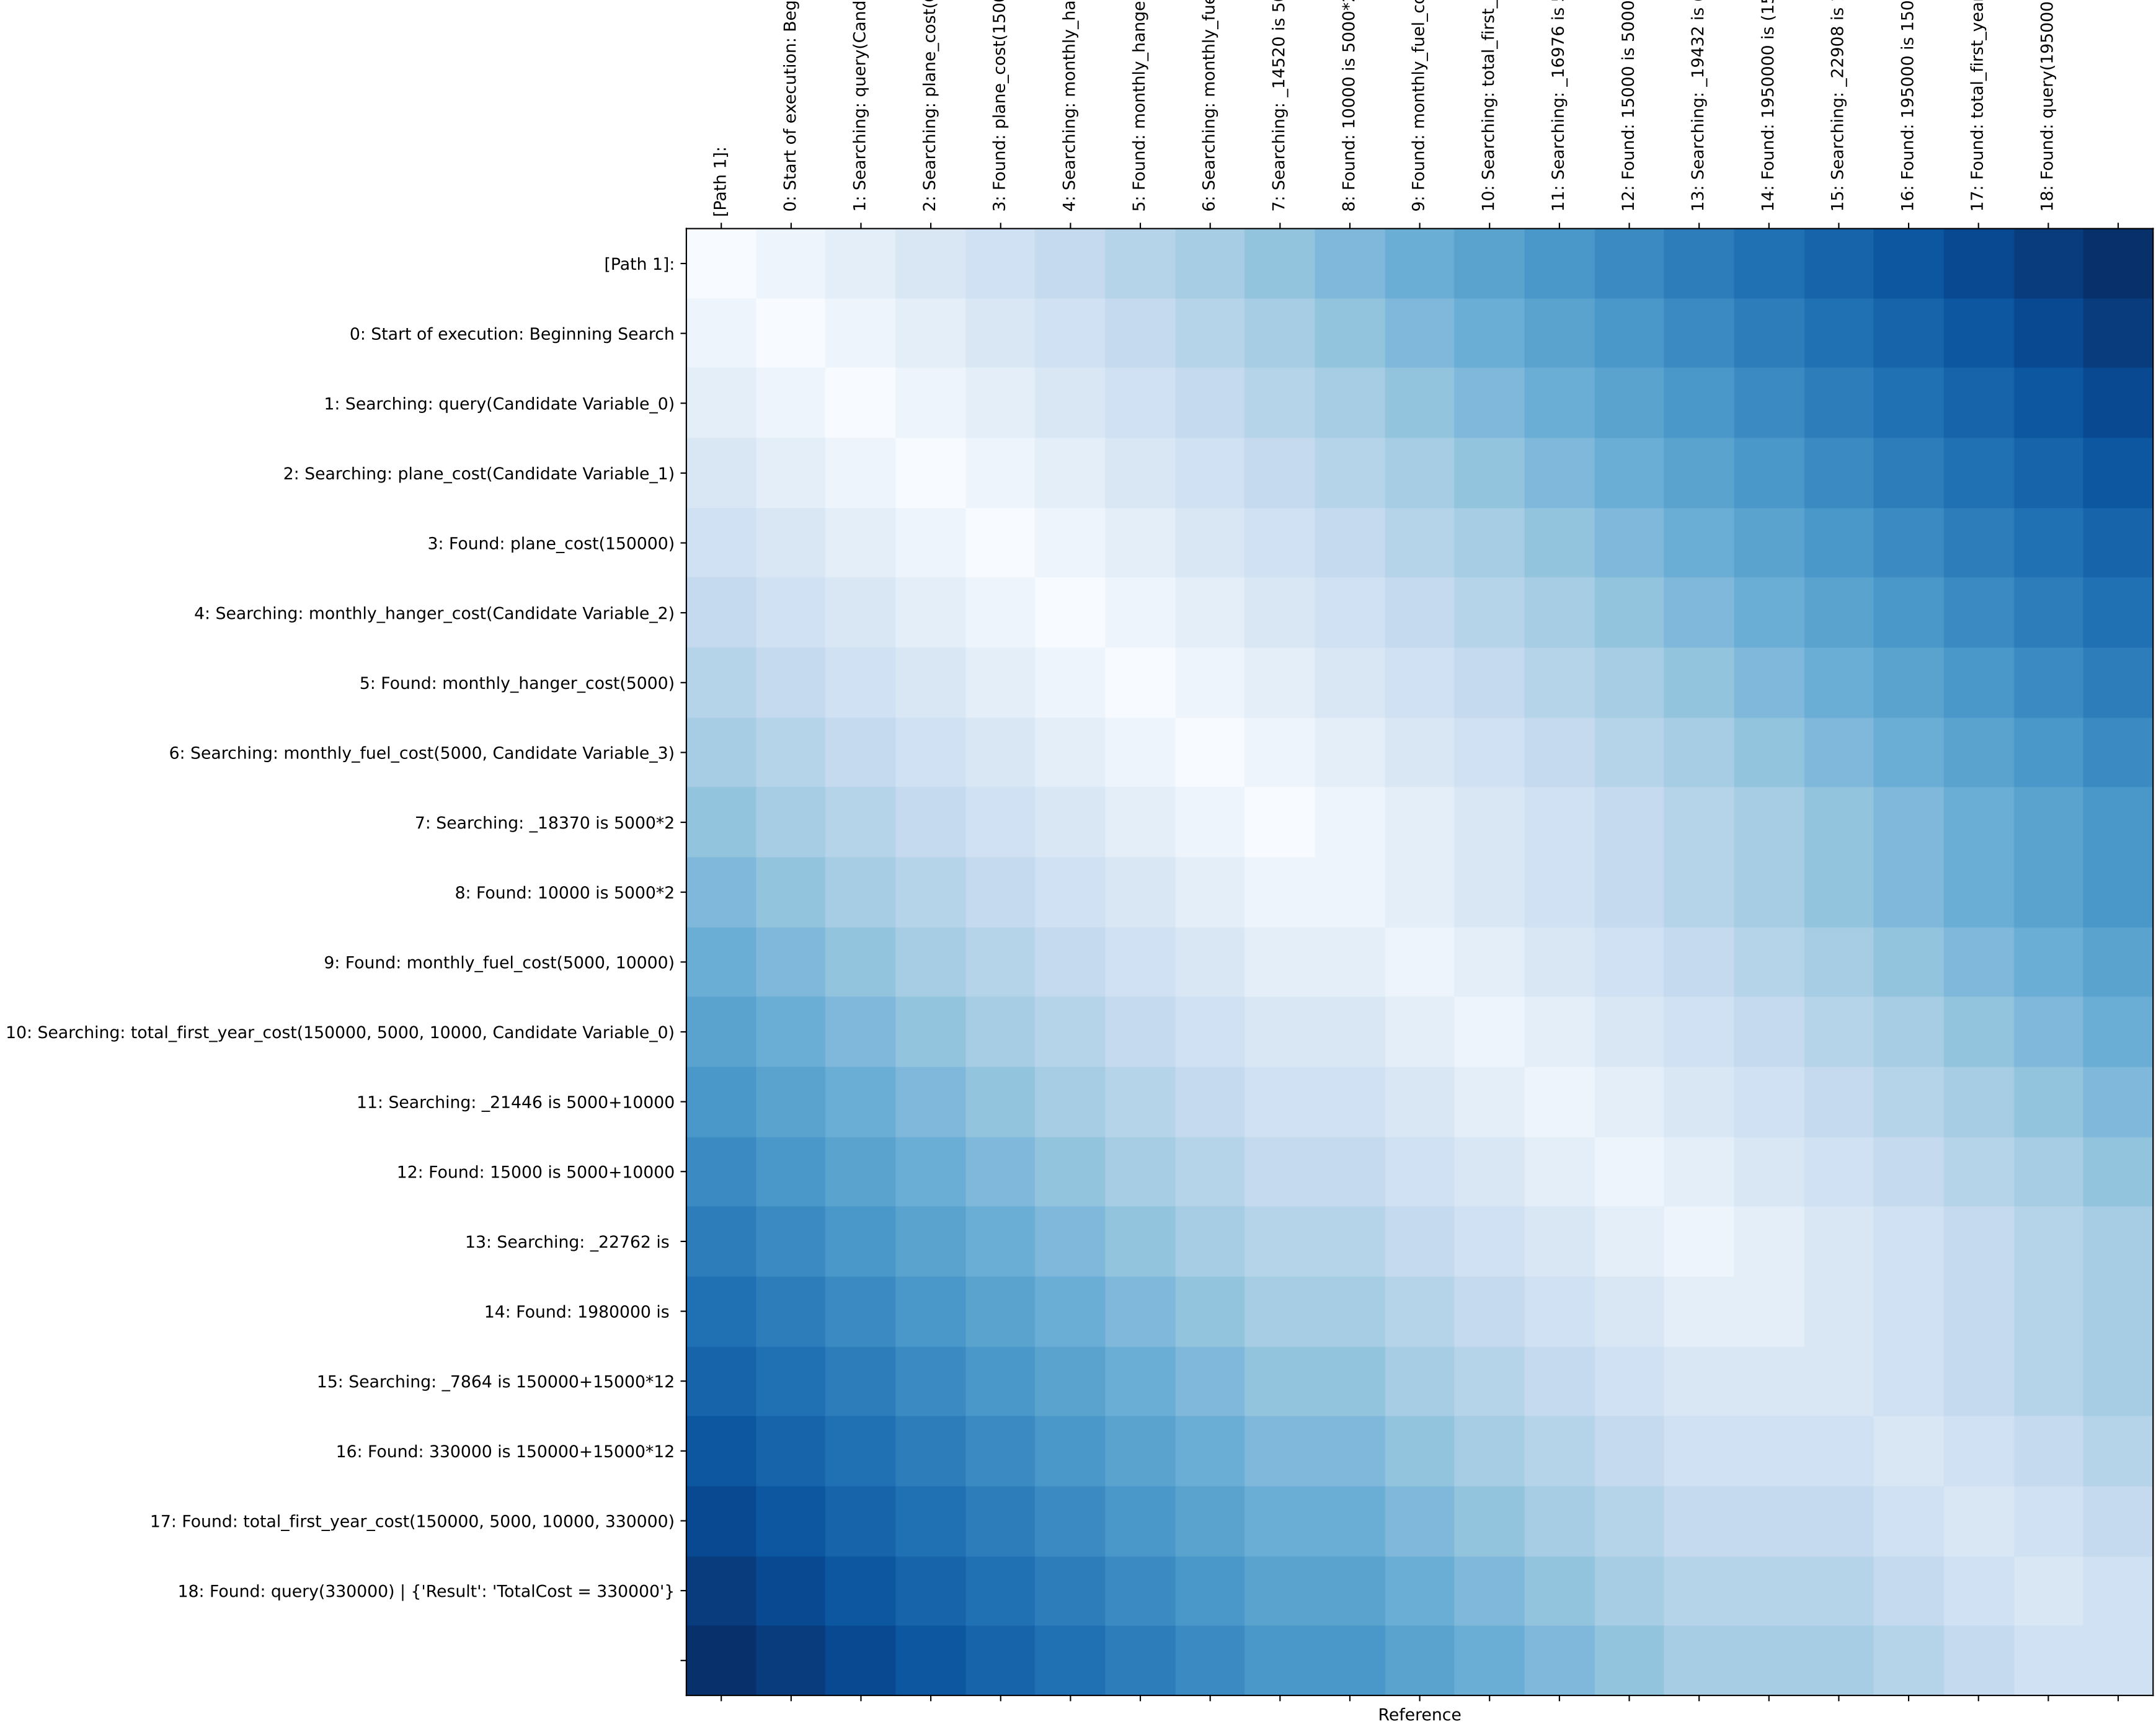

Supplement: supplementary_material [file attachment]

Hypothesis

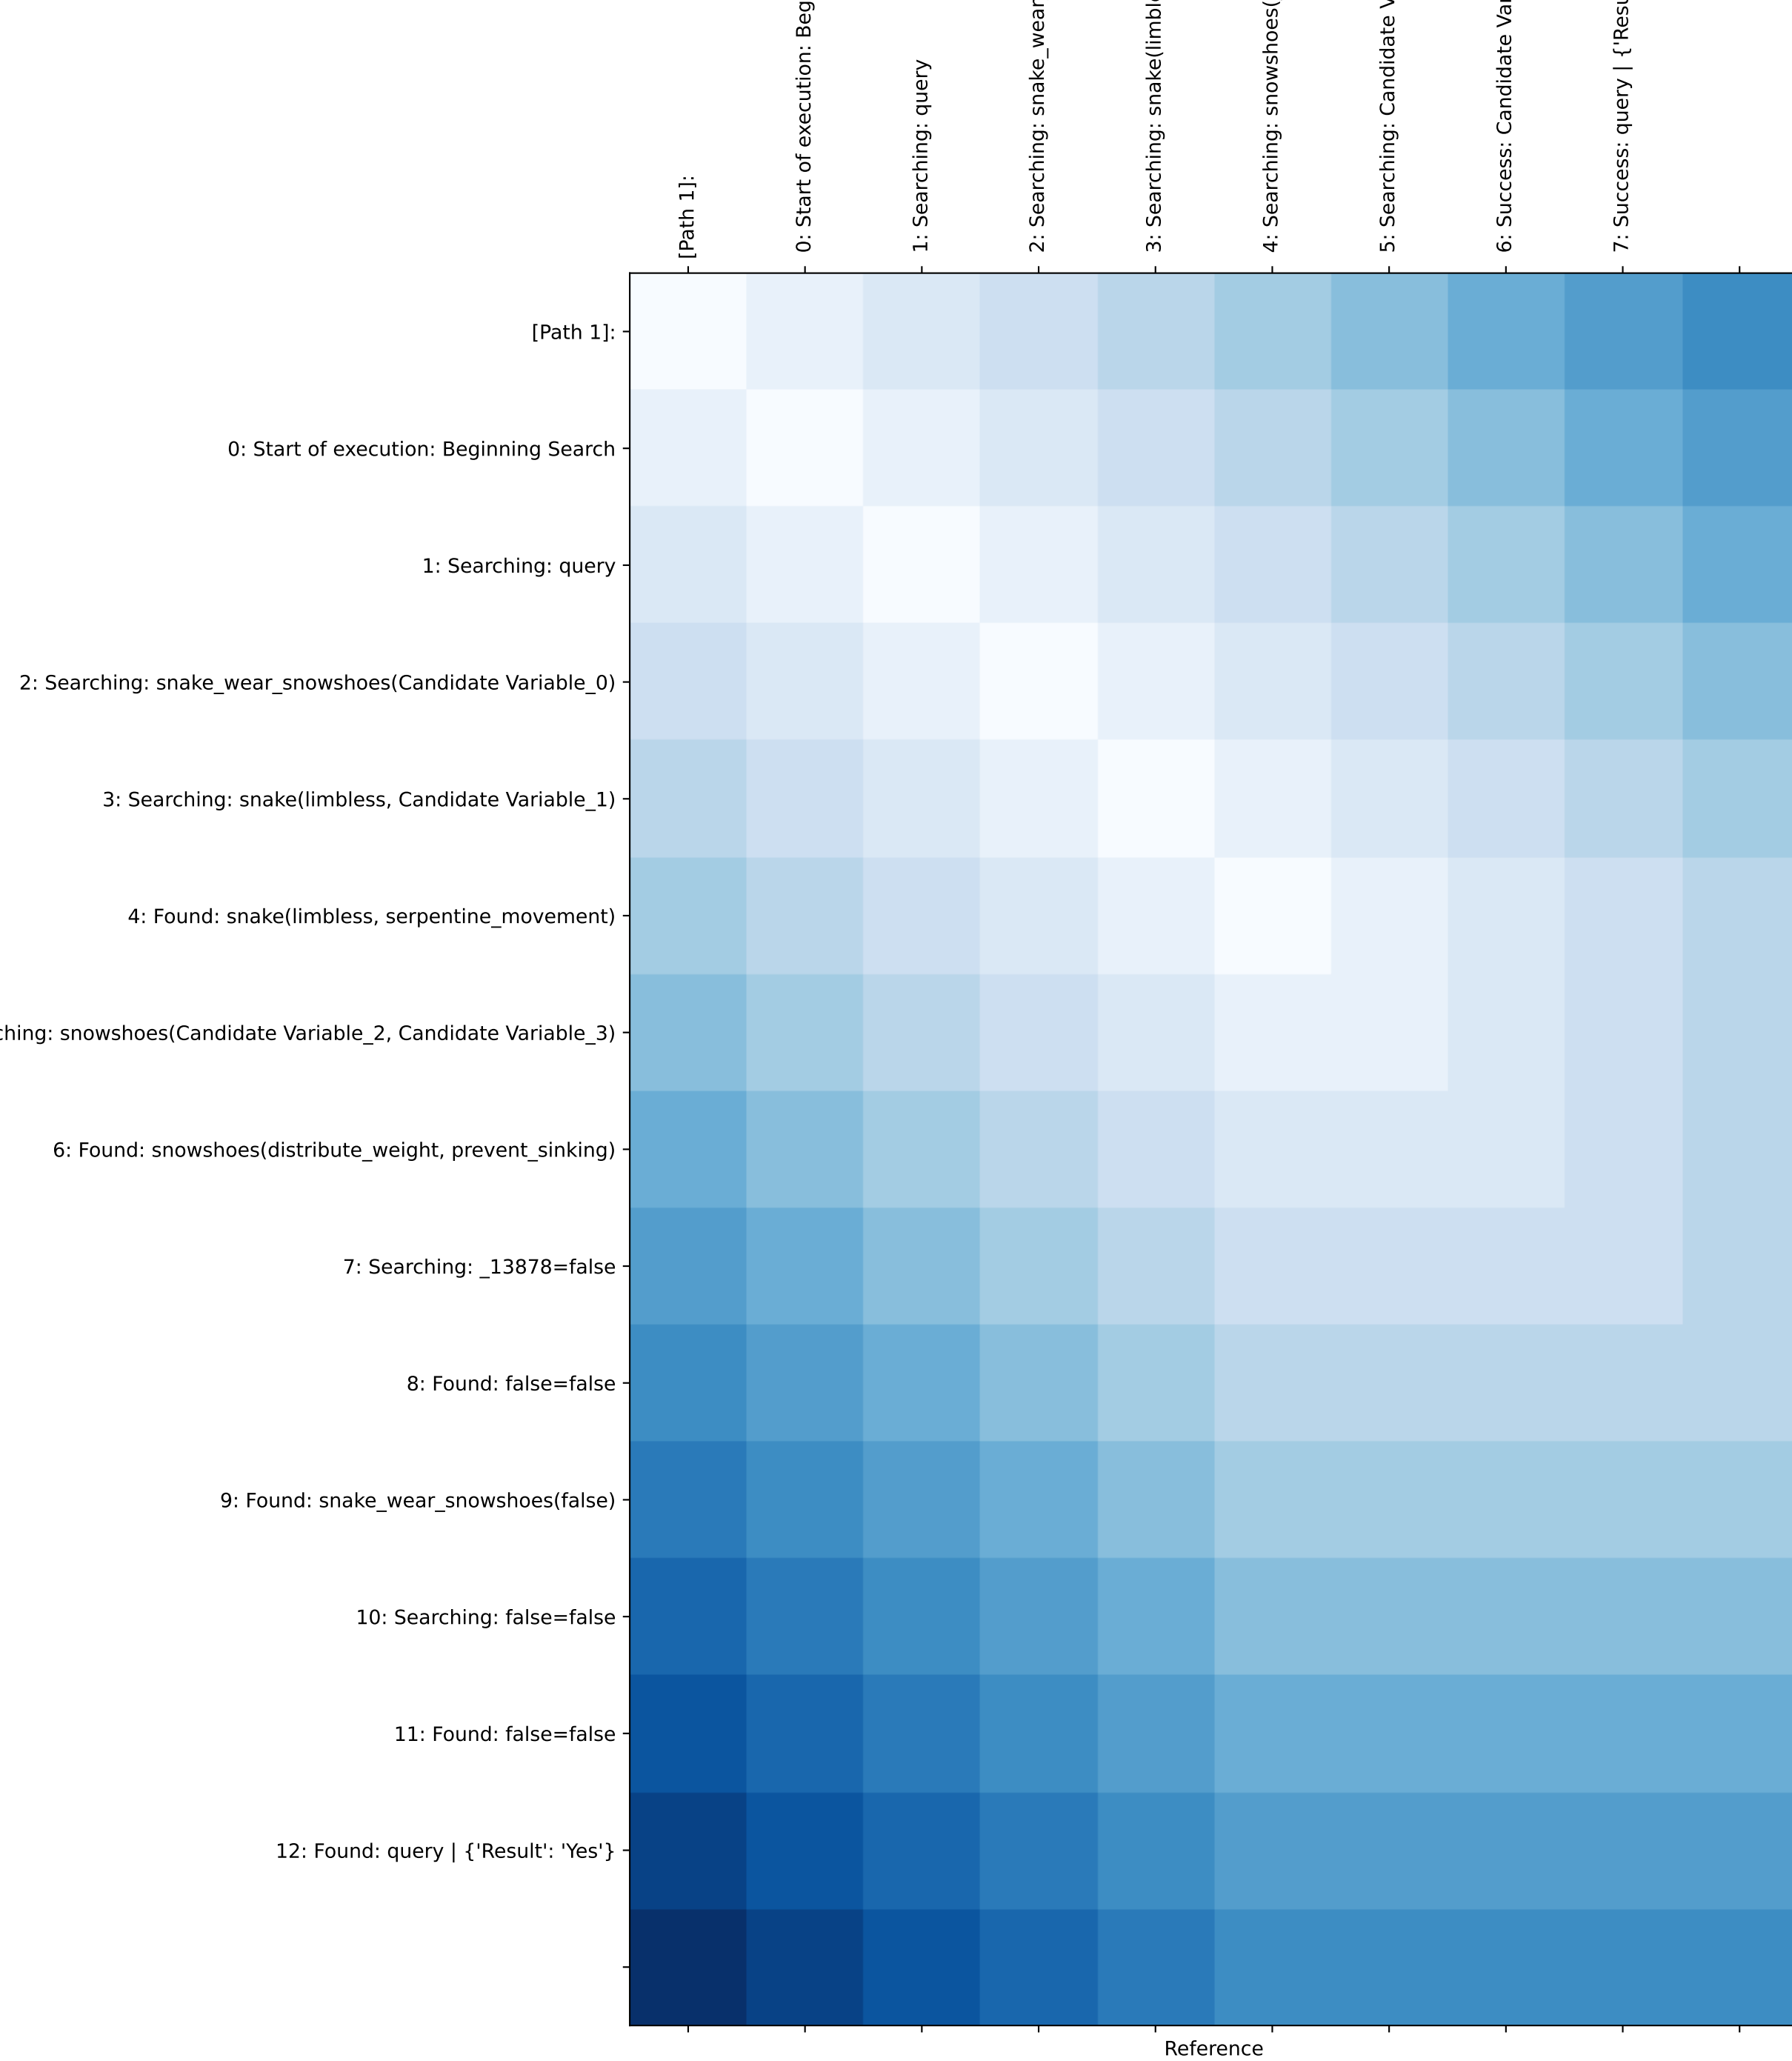

Reference

Supplement: supplementary_material [file attachment]

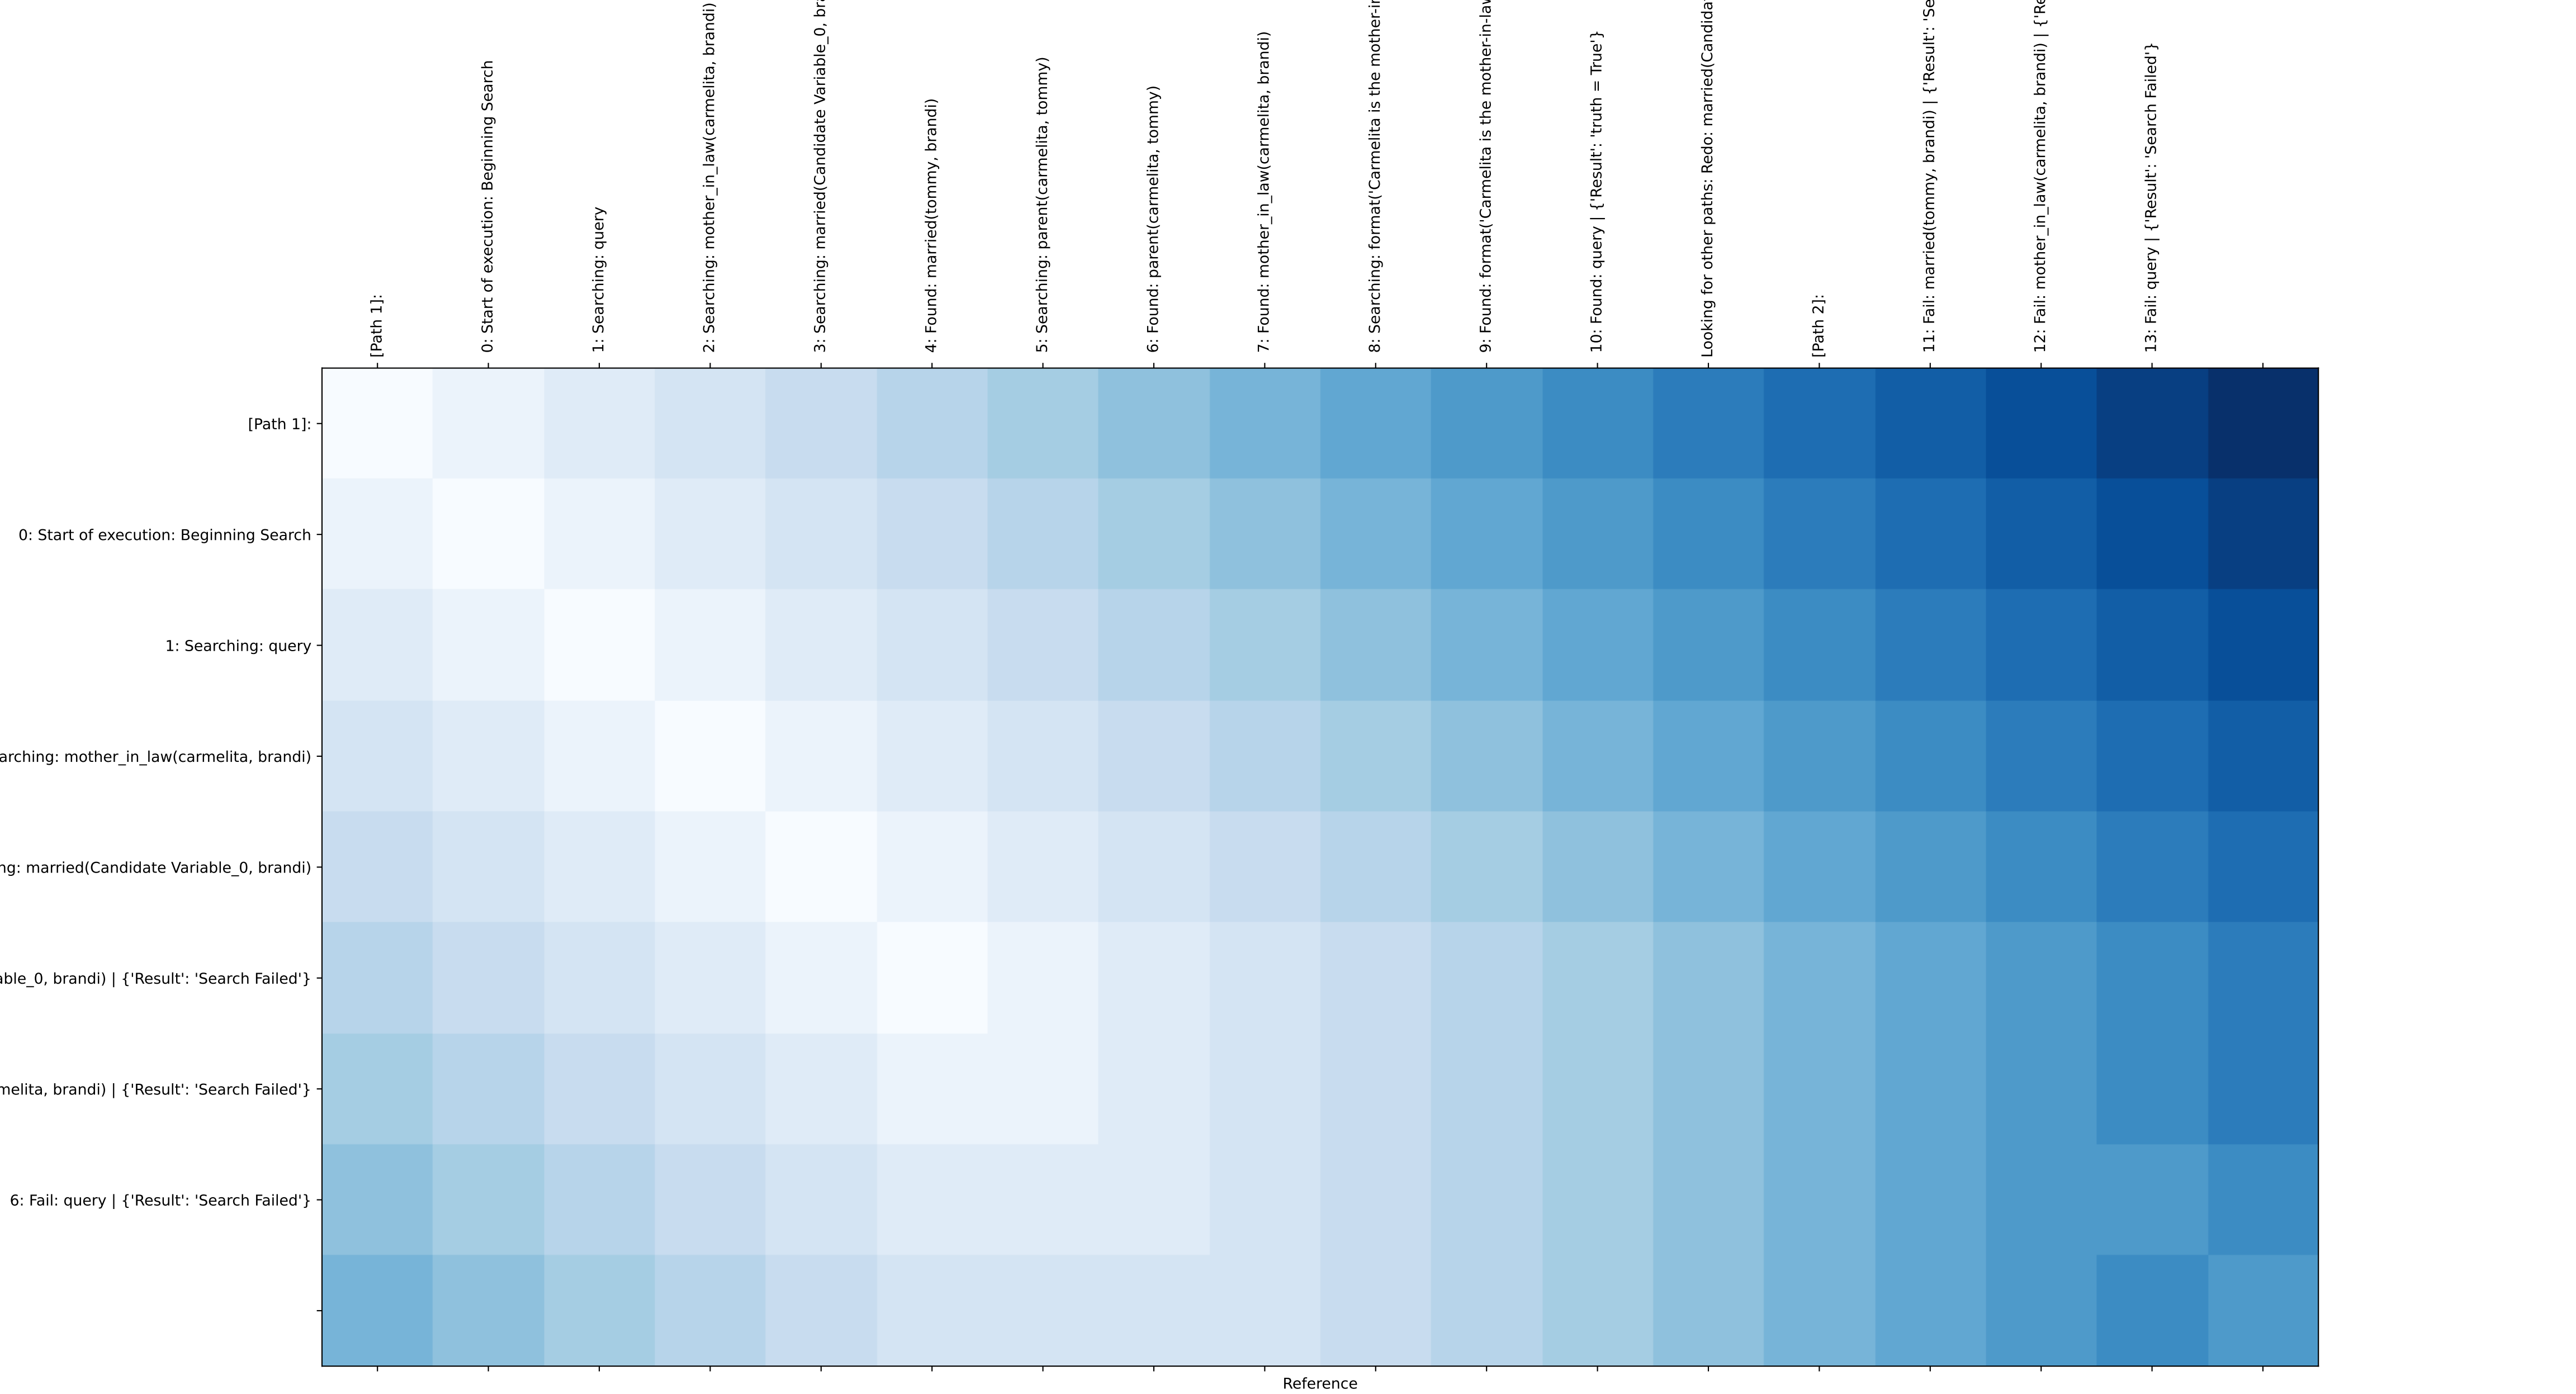

Supplement: supplementary_material [file attachment]

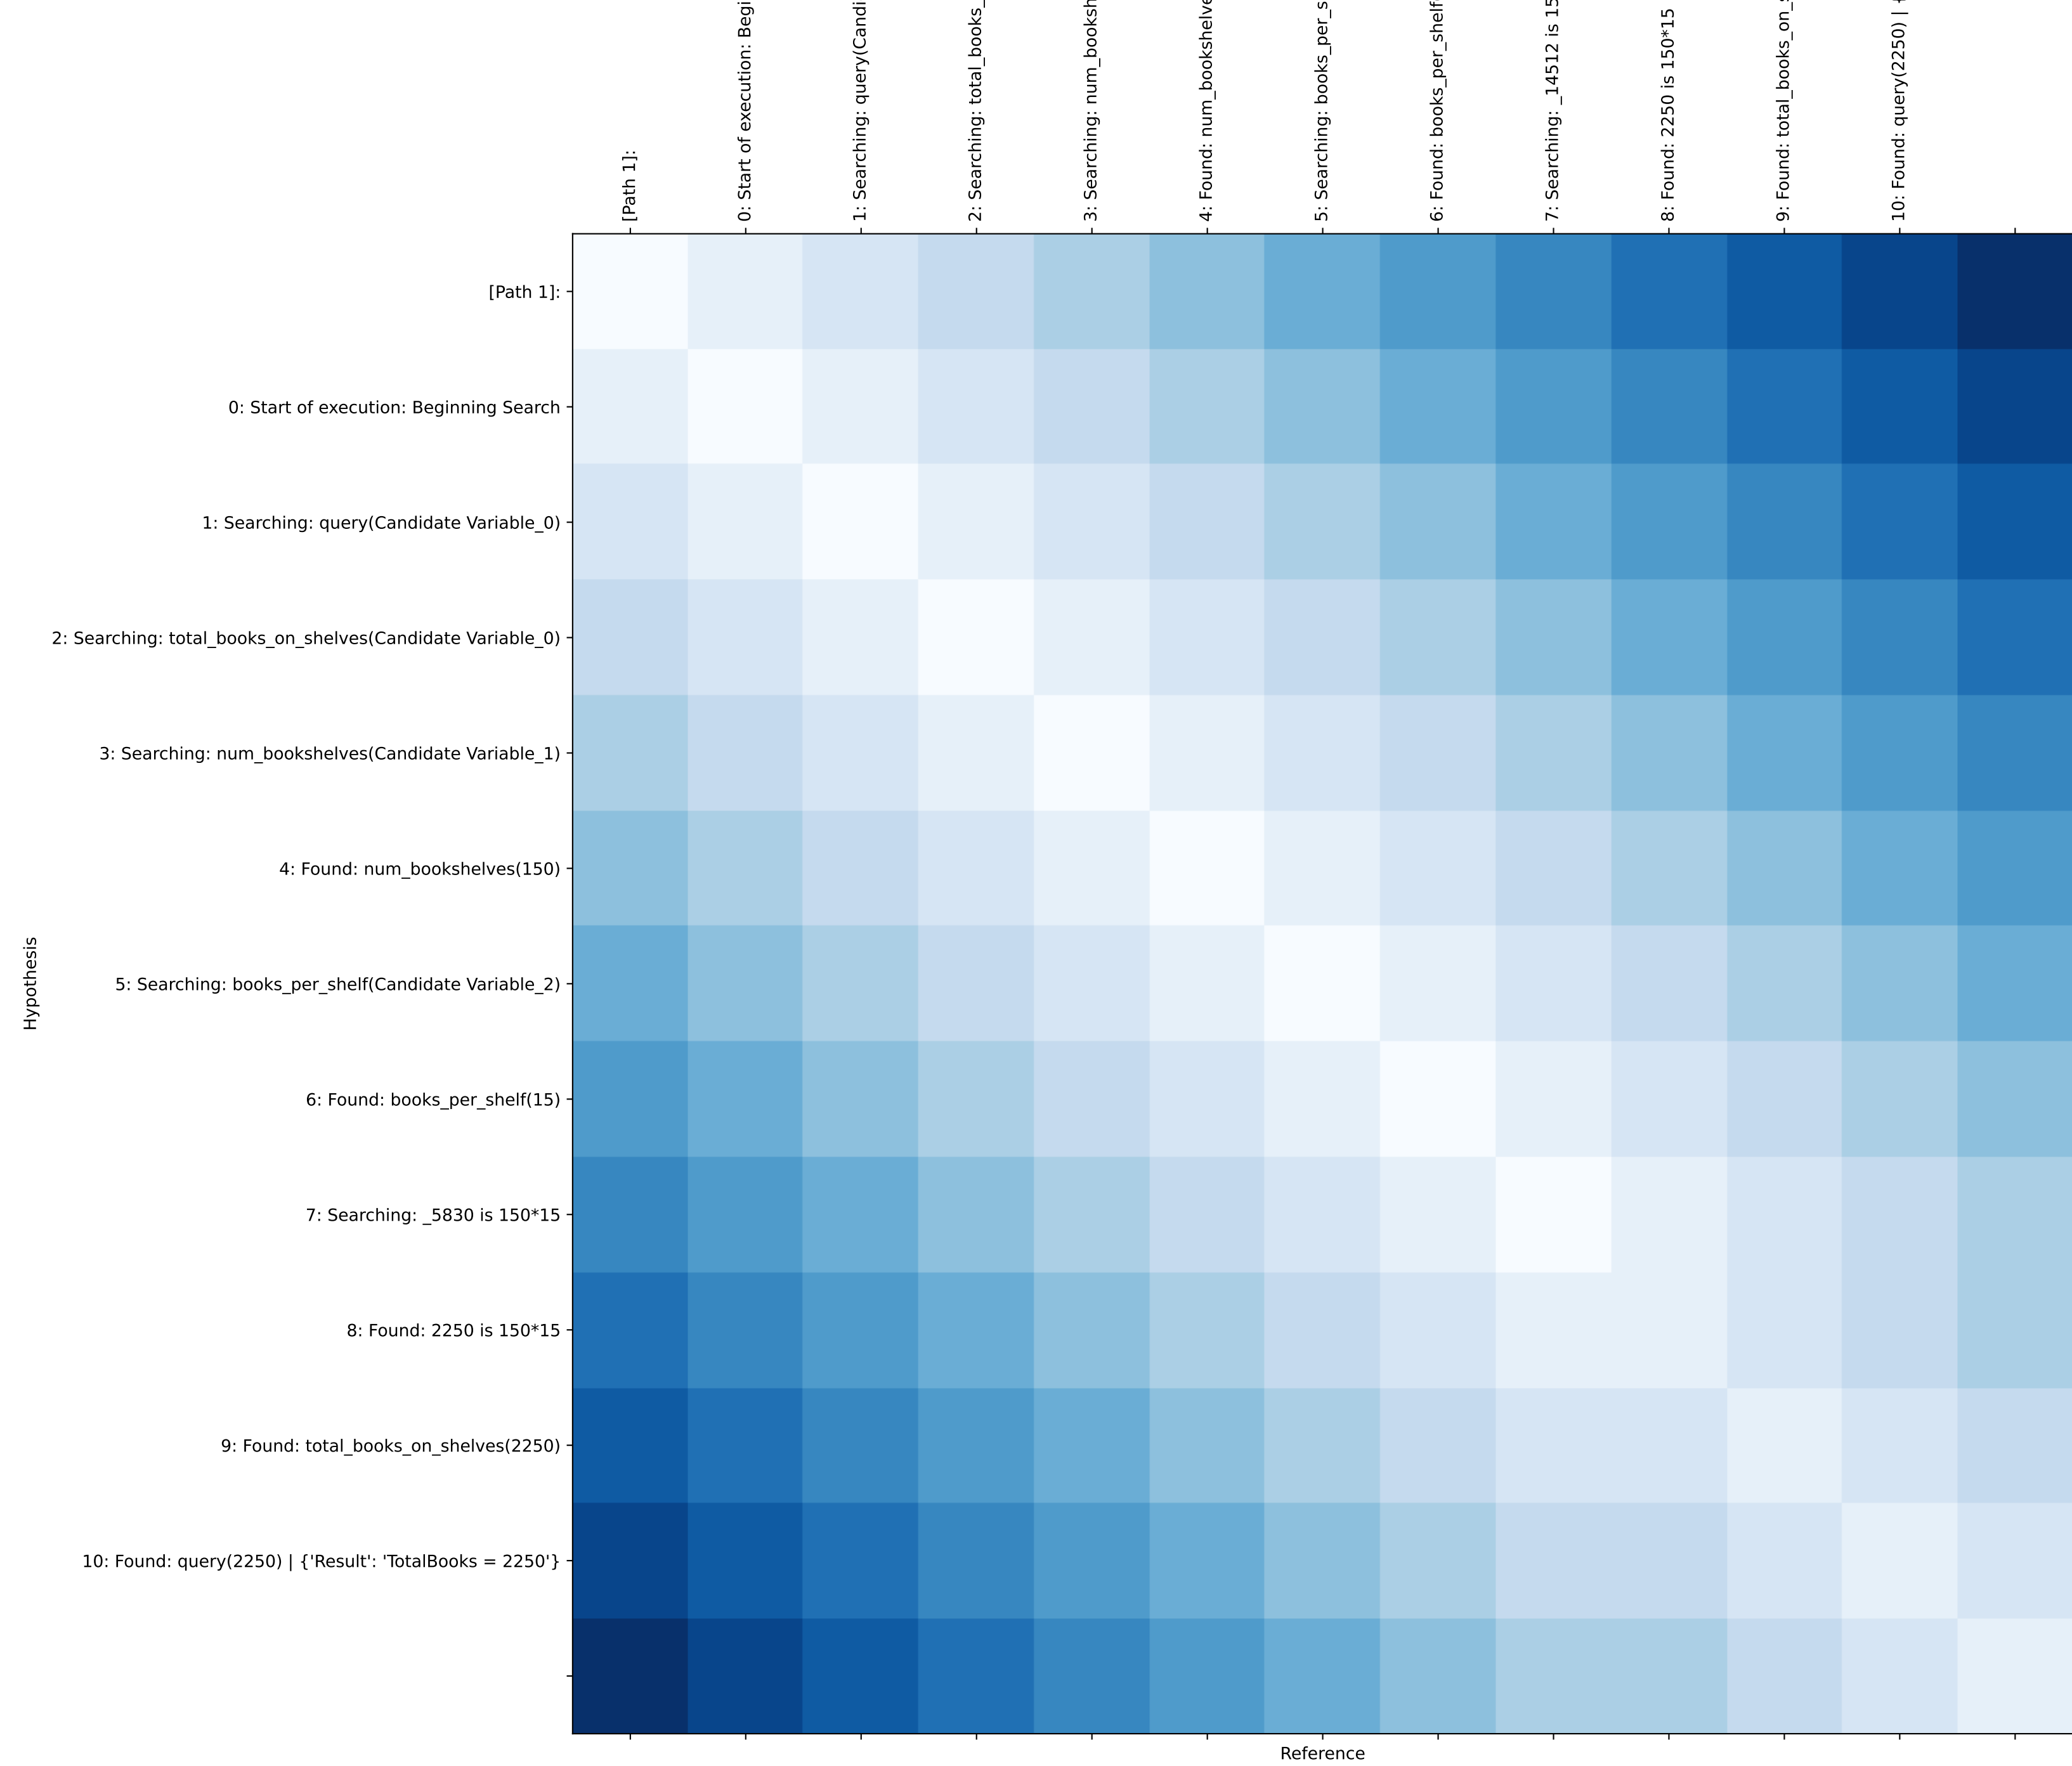

Supplement: supplementary_material [file attachment]

Hypothesis

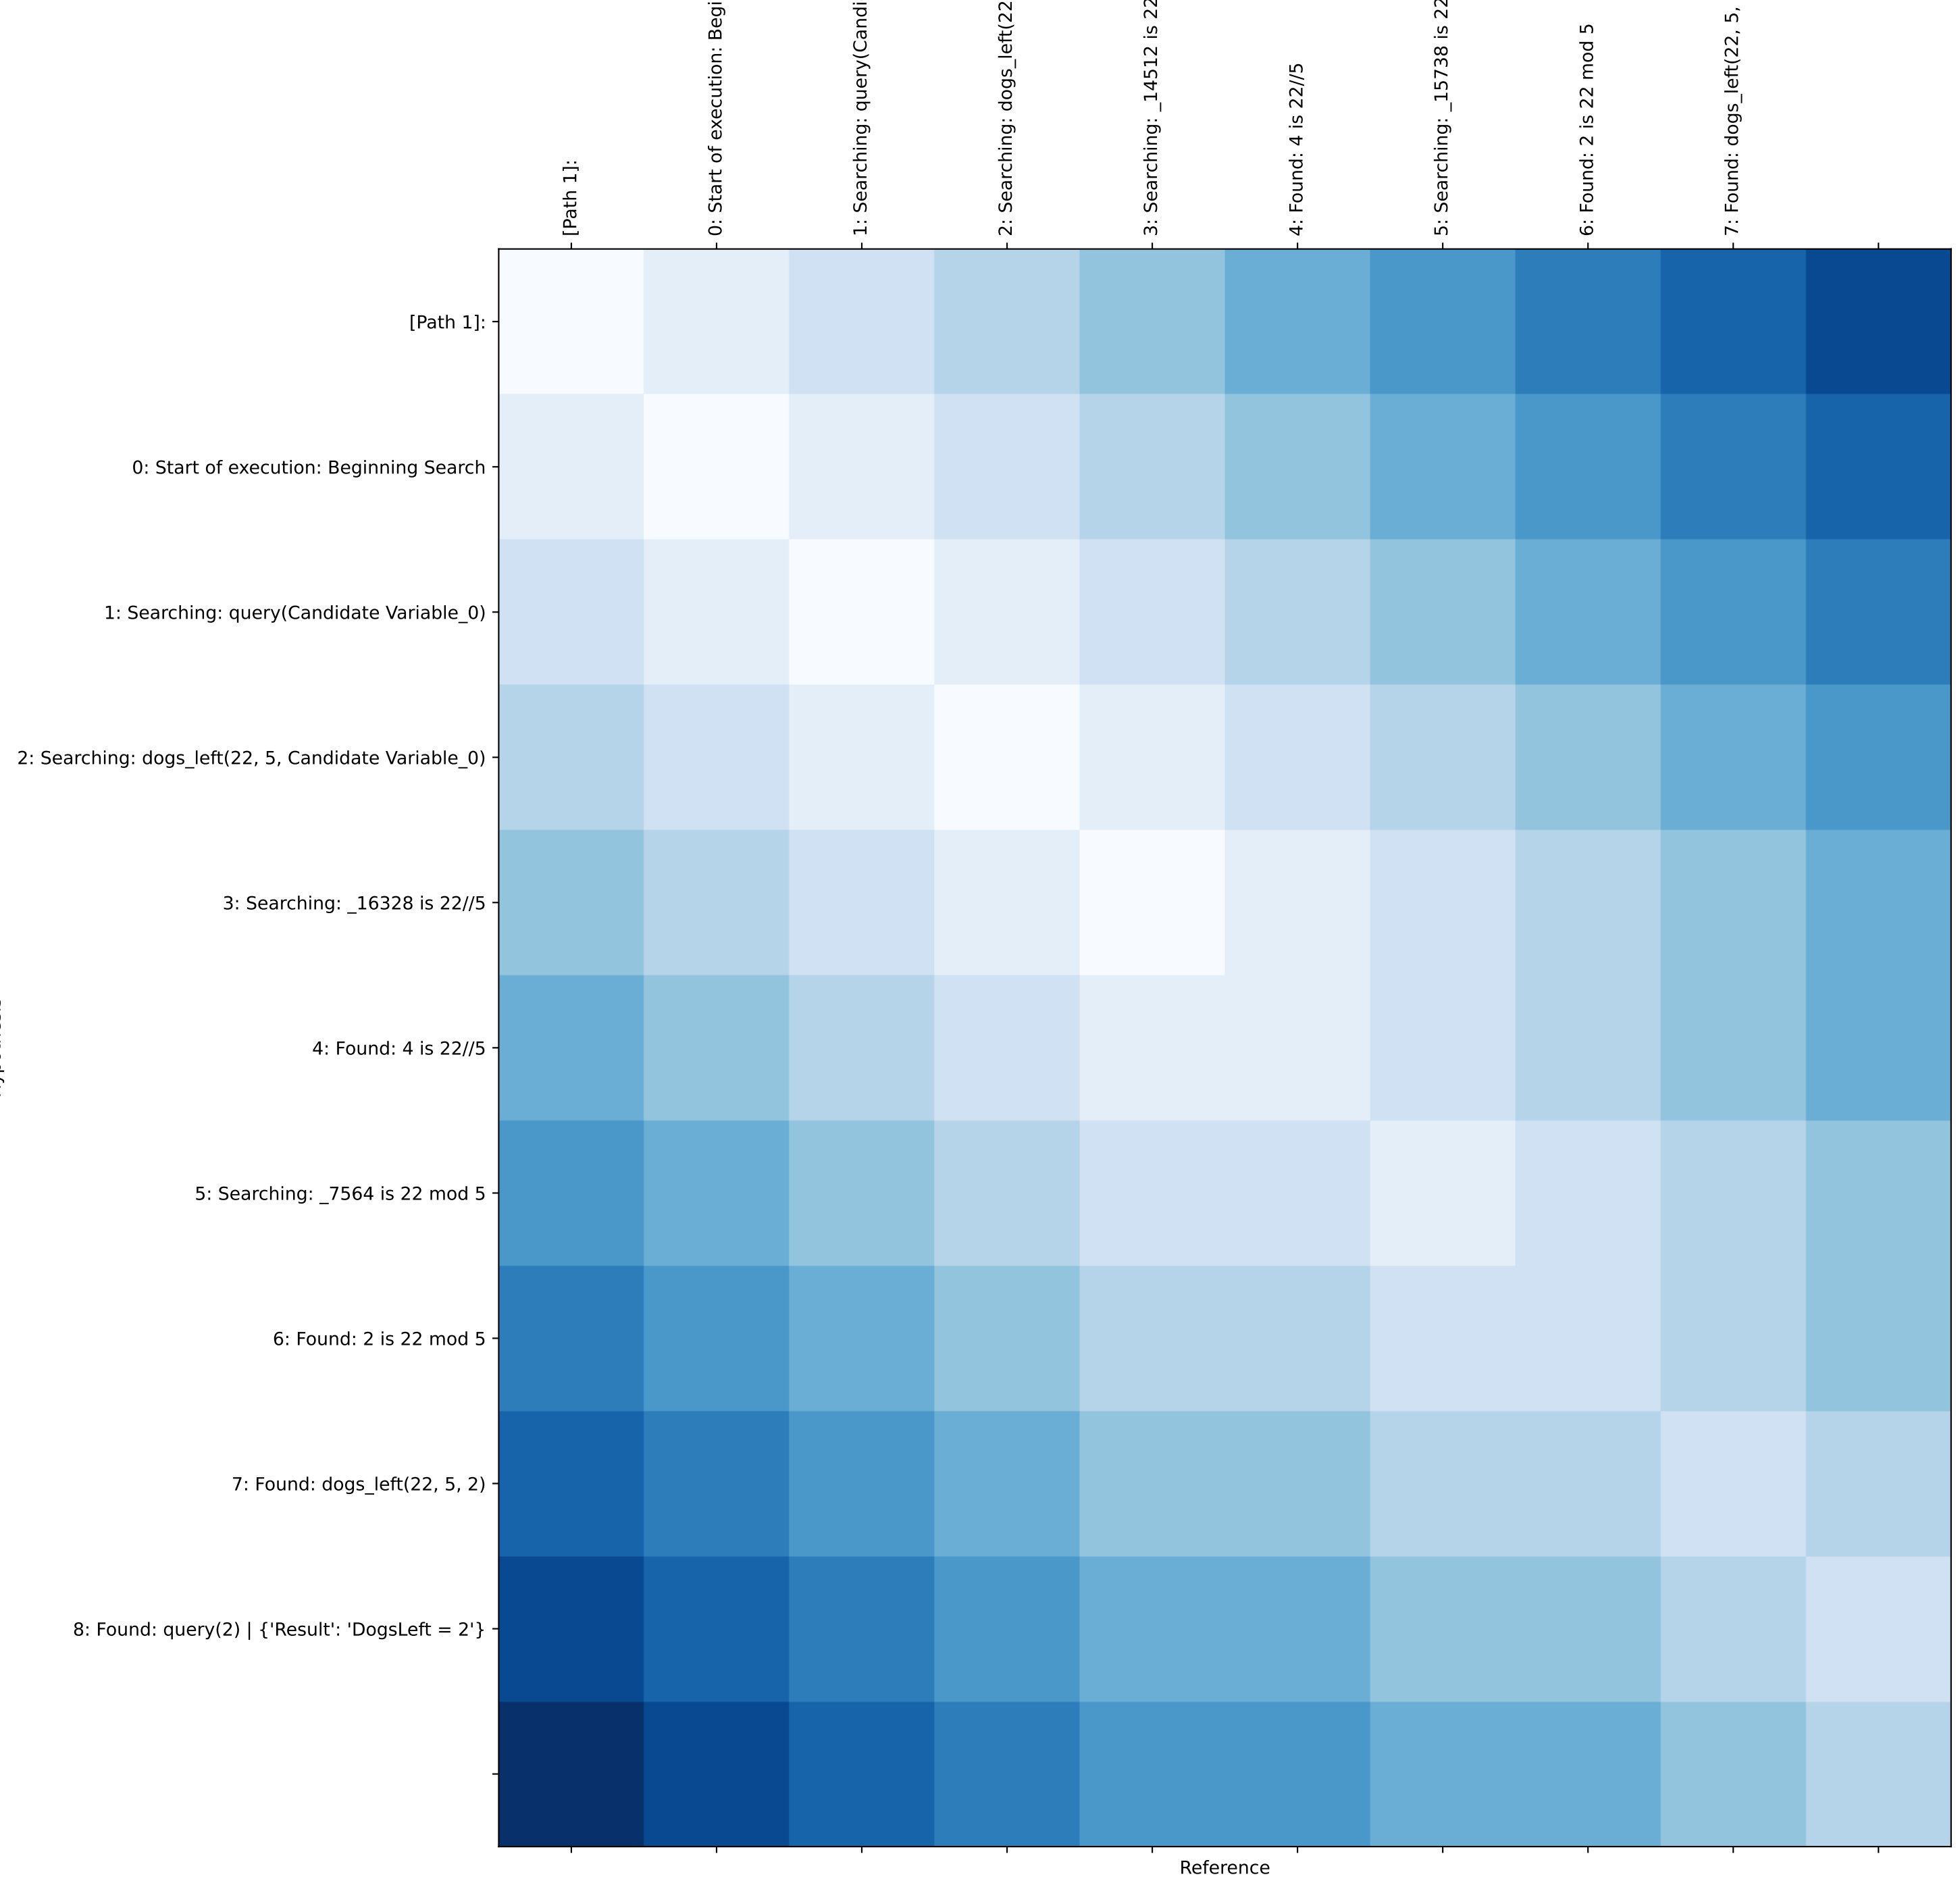

Supplement: supplementary_material [file attachment]

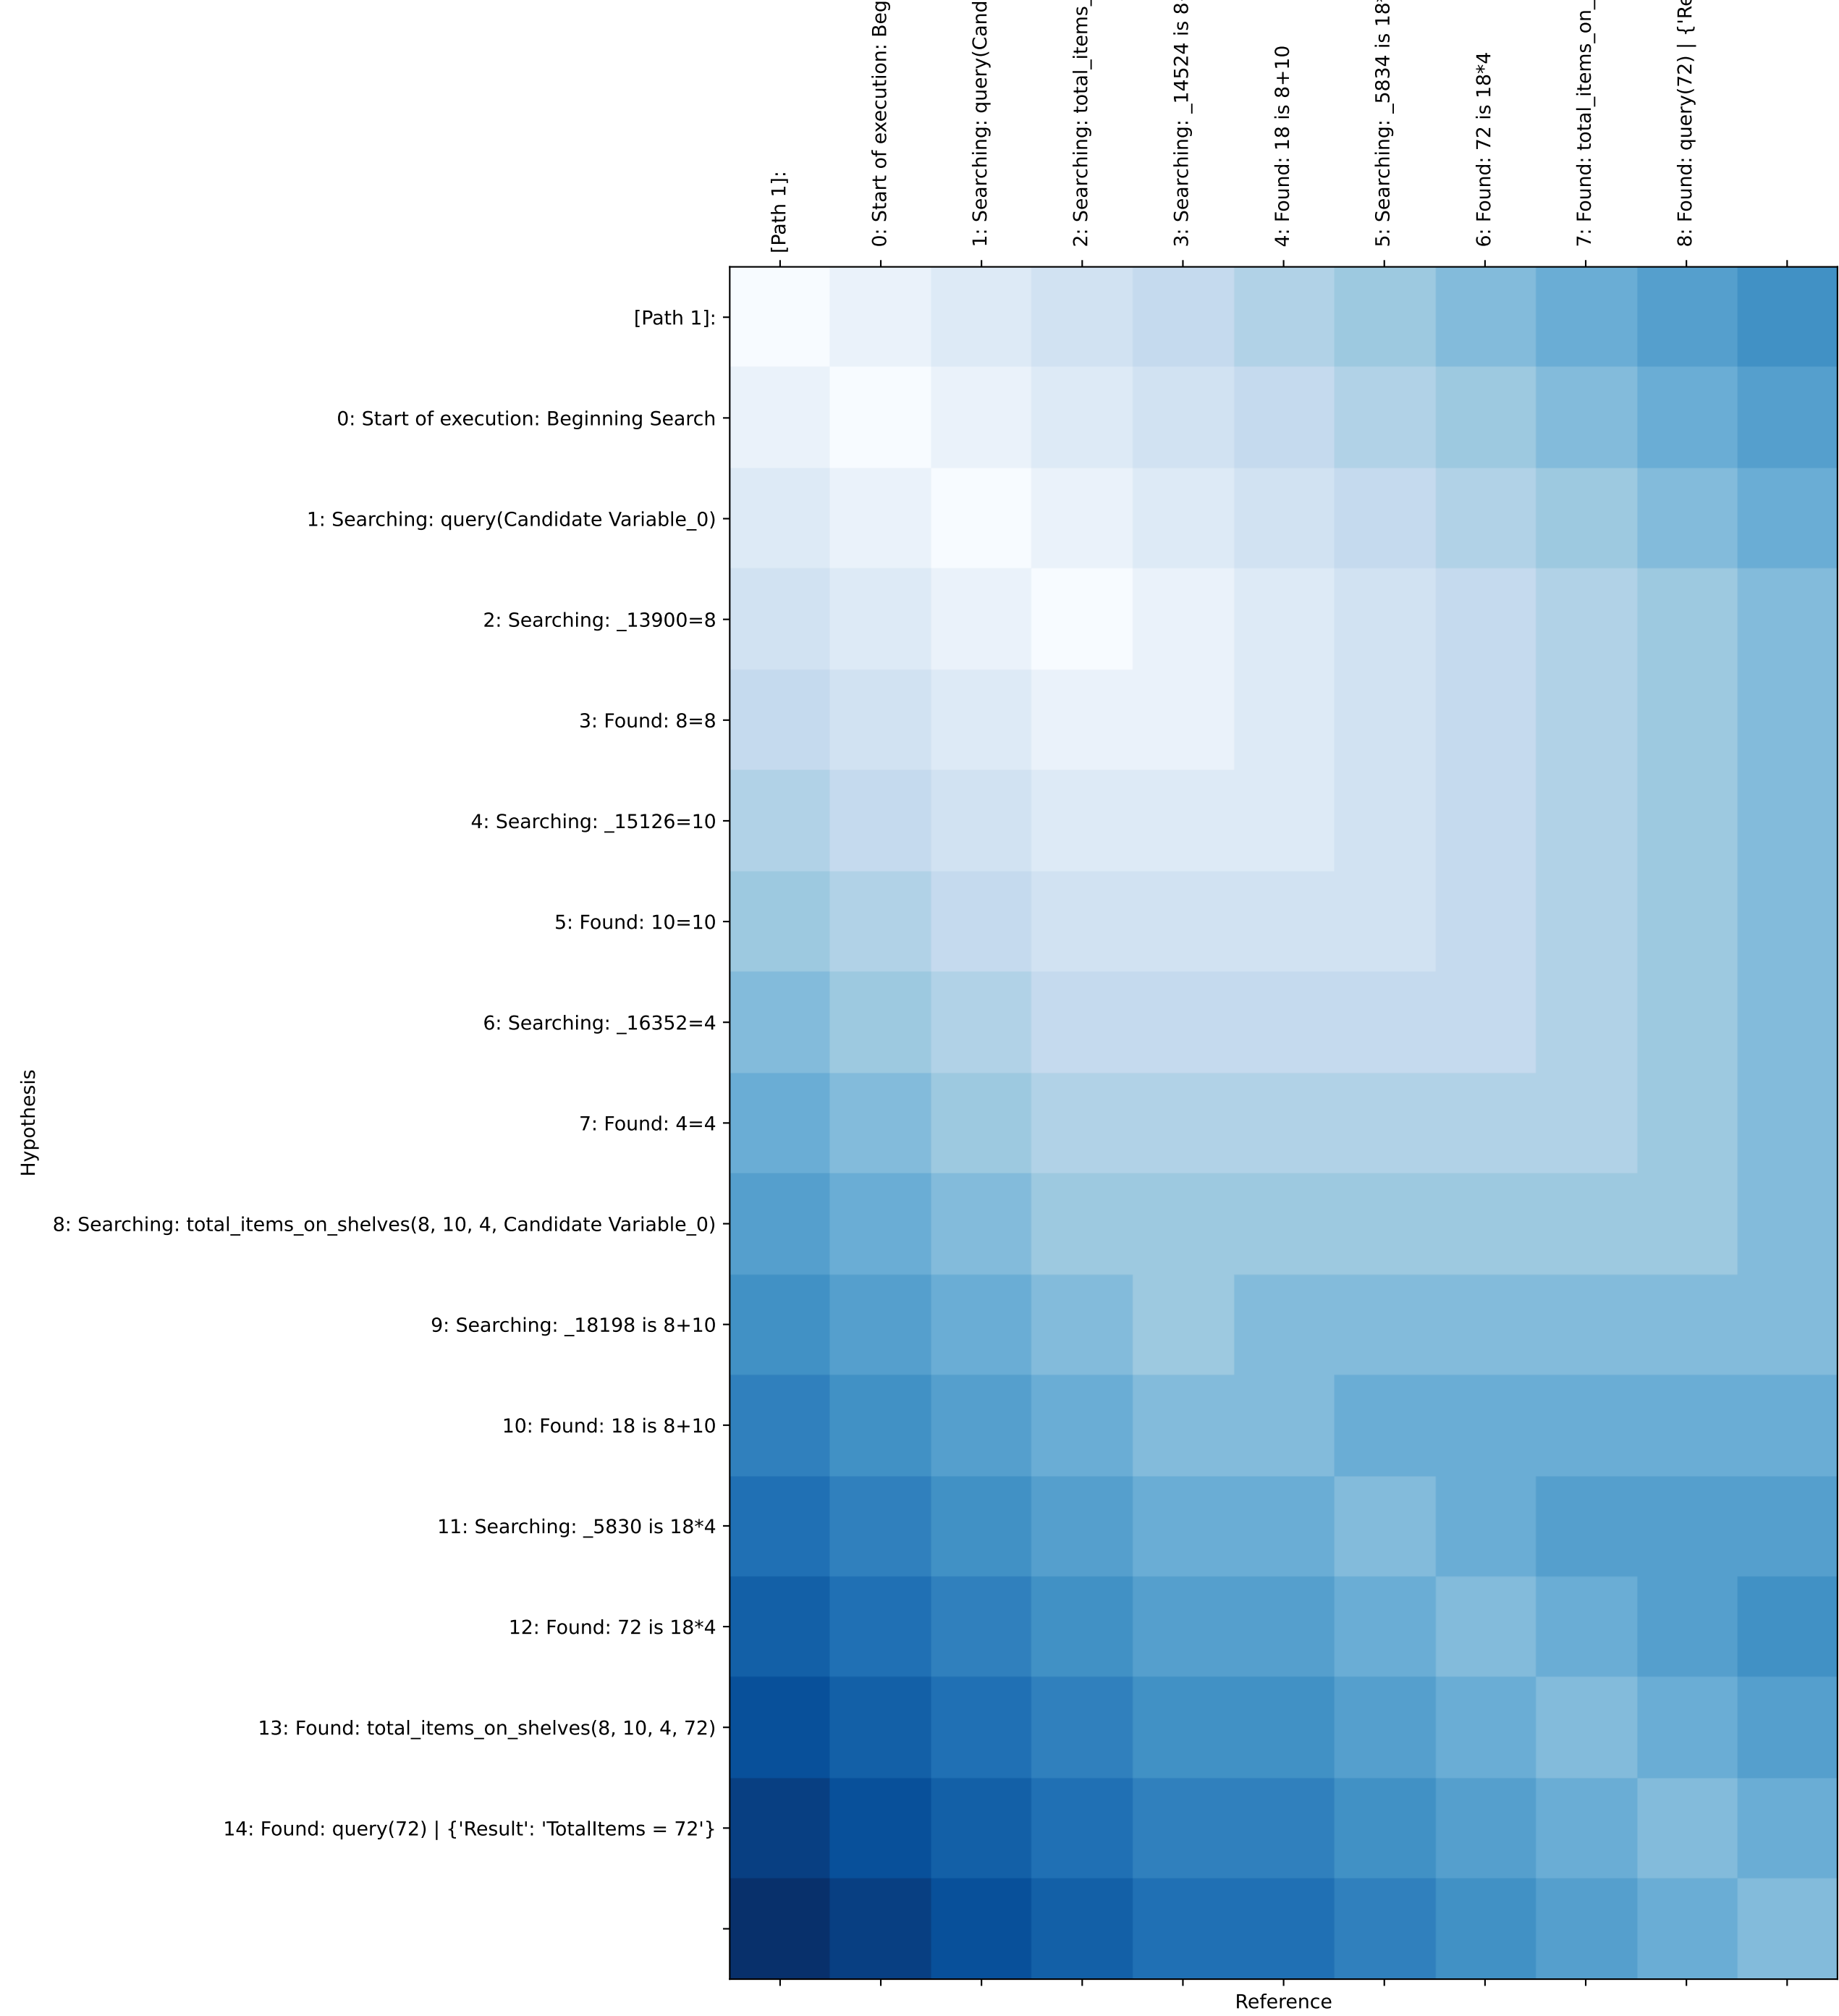

Supplement: supplementary_material [file attachment]

Hypothesis

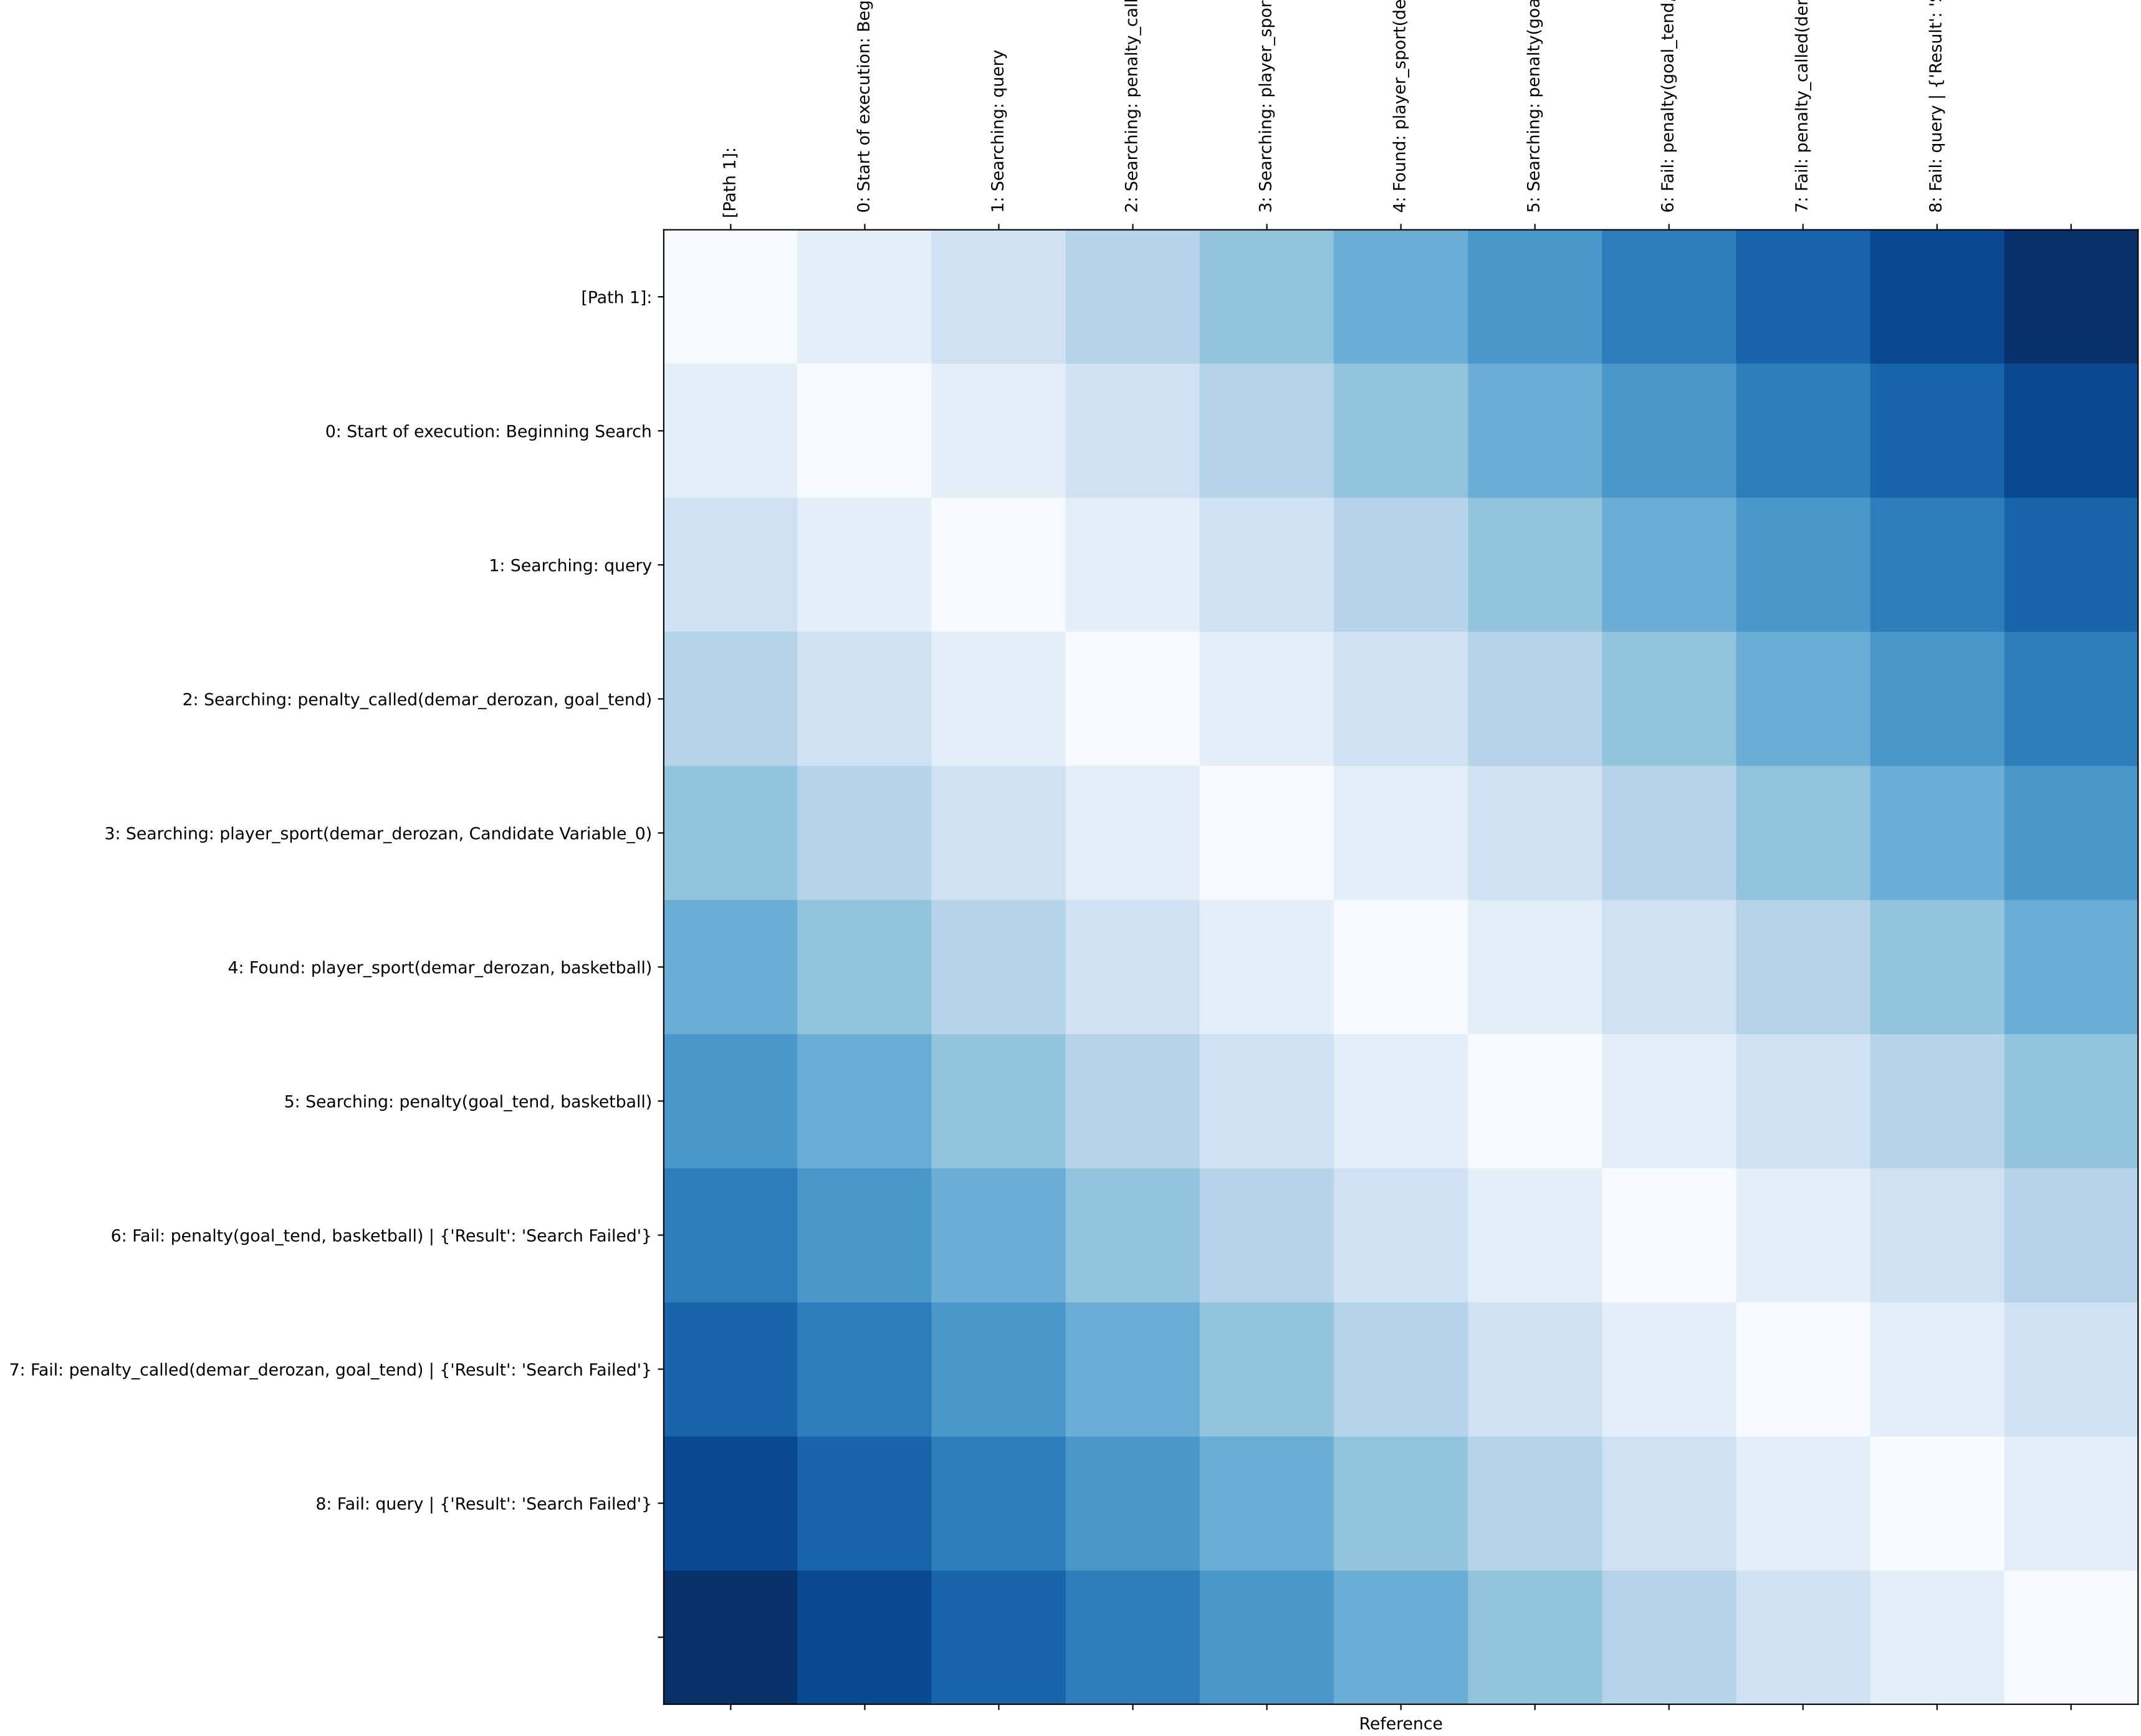

Reference

Supplement: supplementary_material [file attachment]

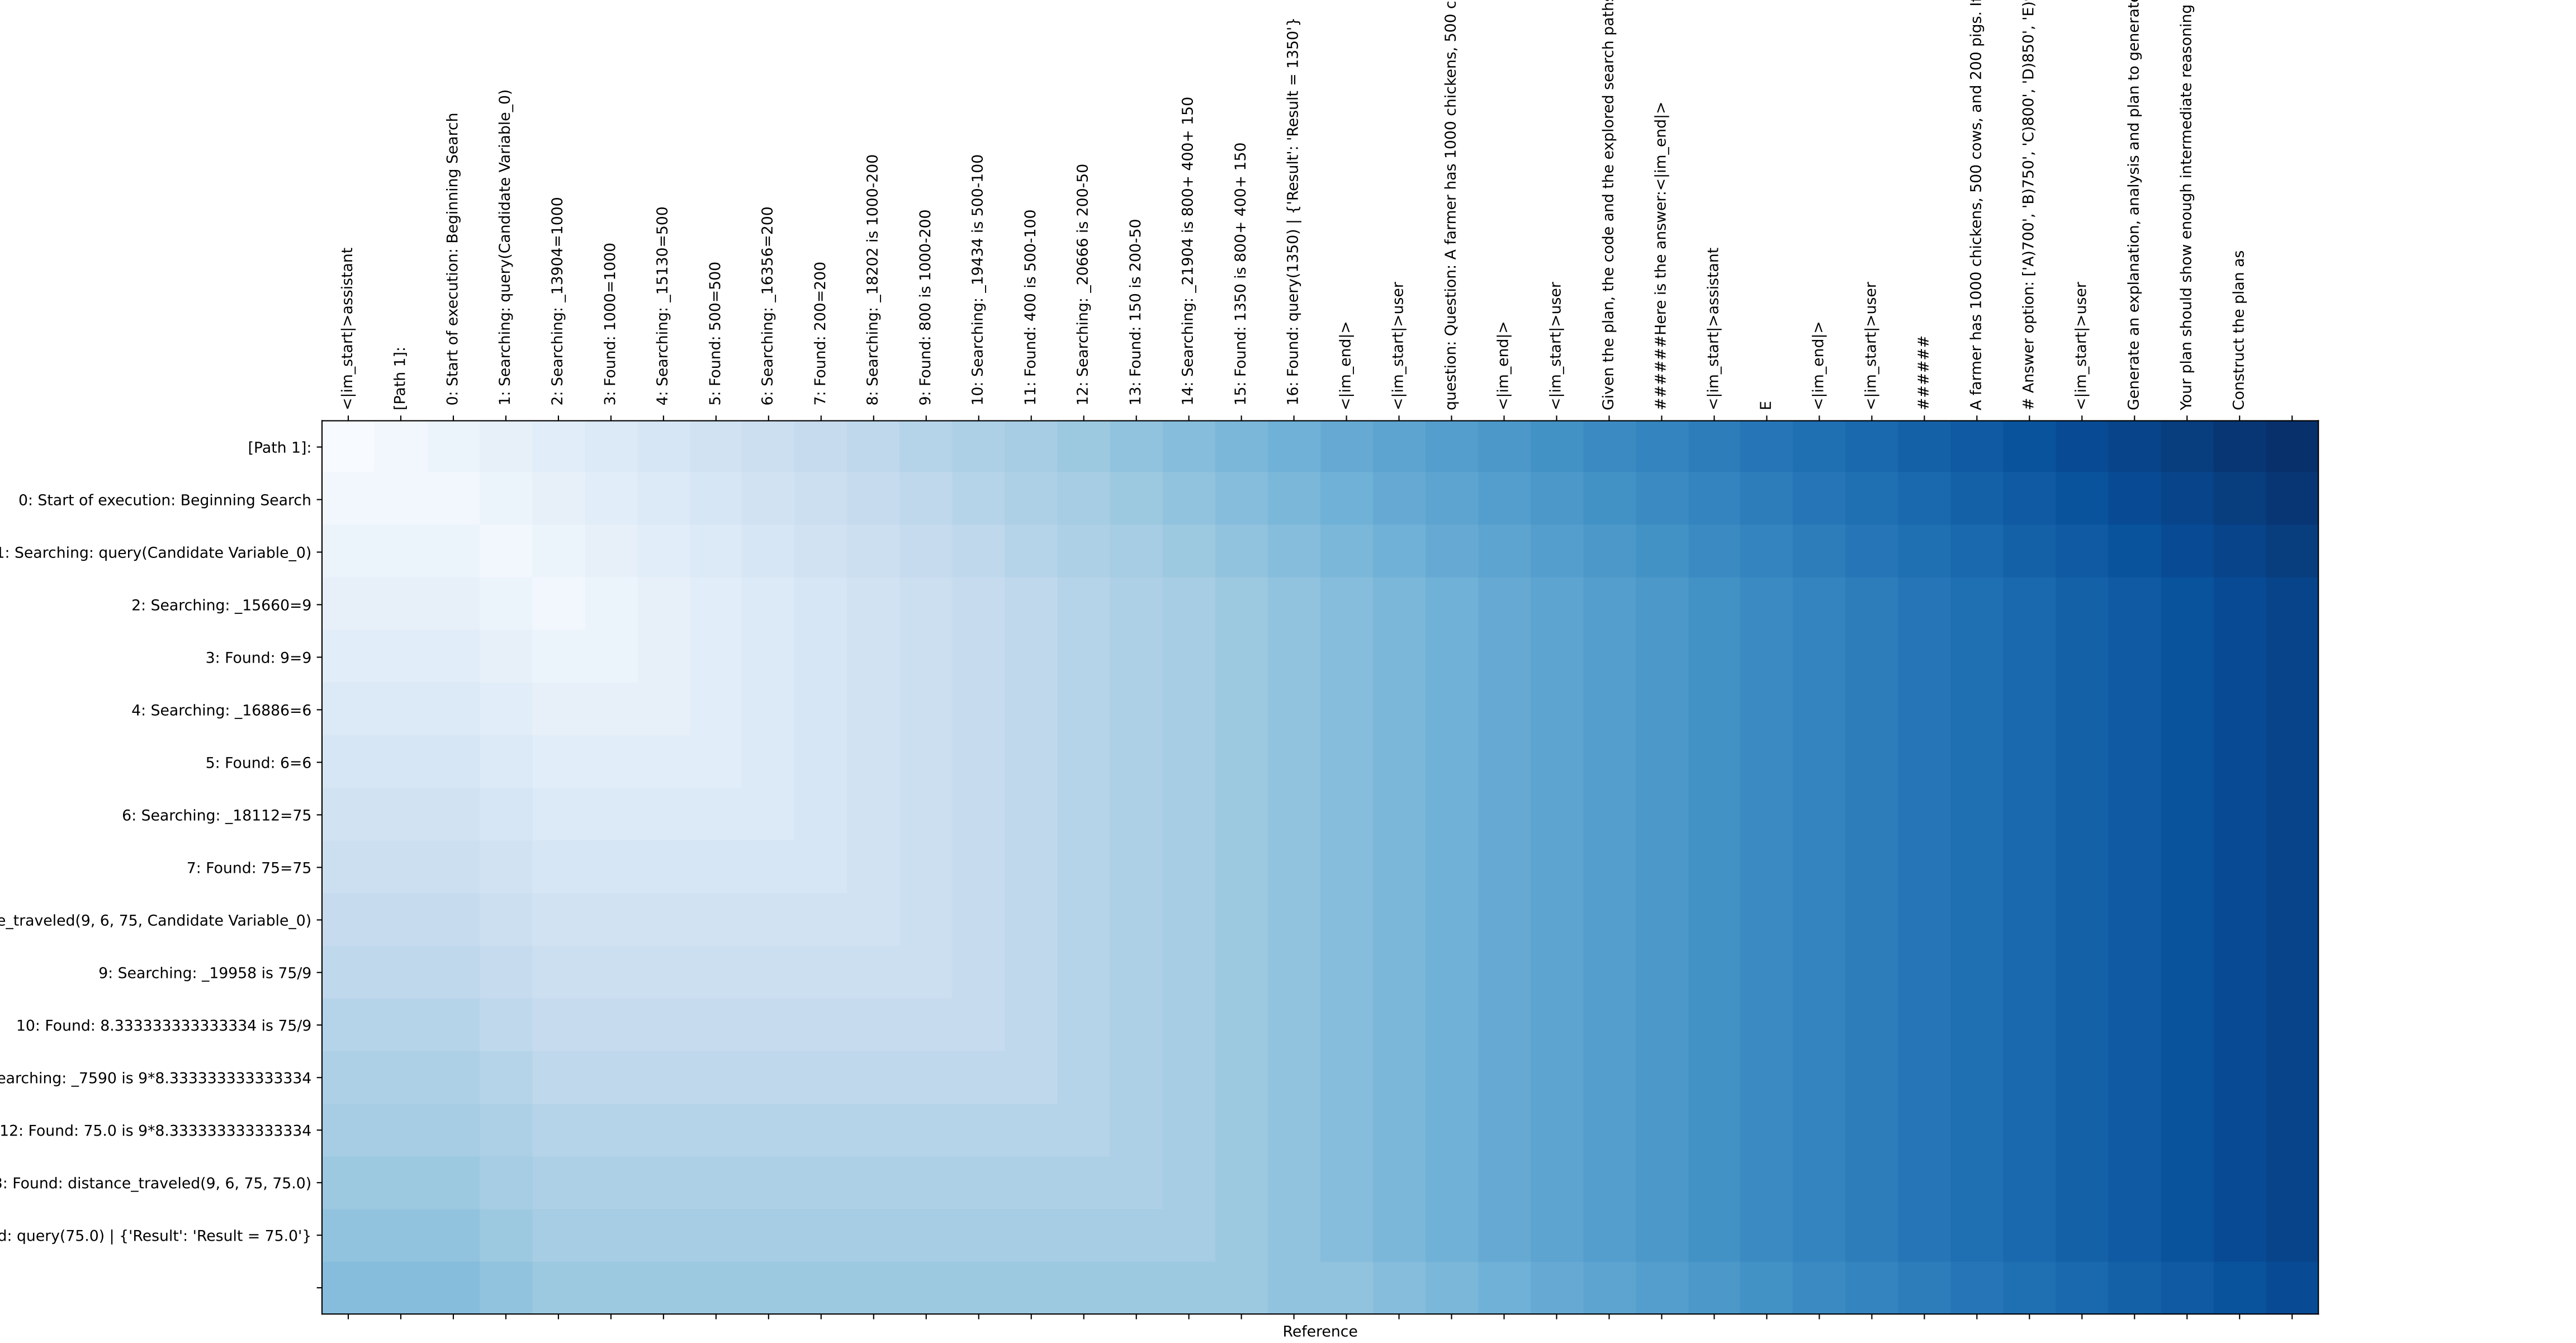

Supplement: supplementary_material [file attachment]

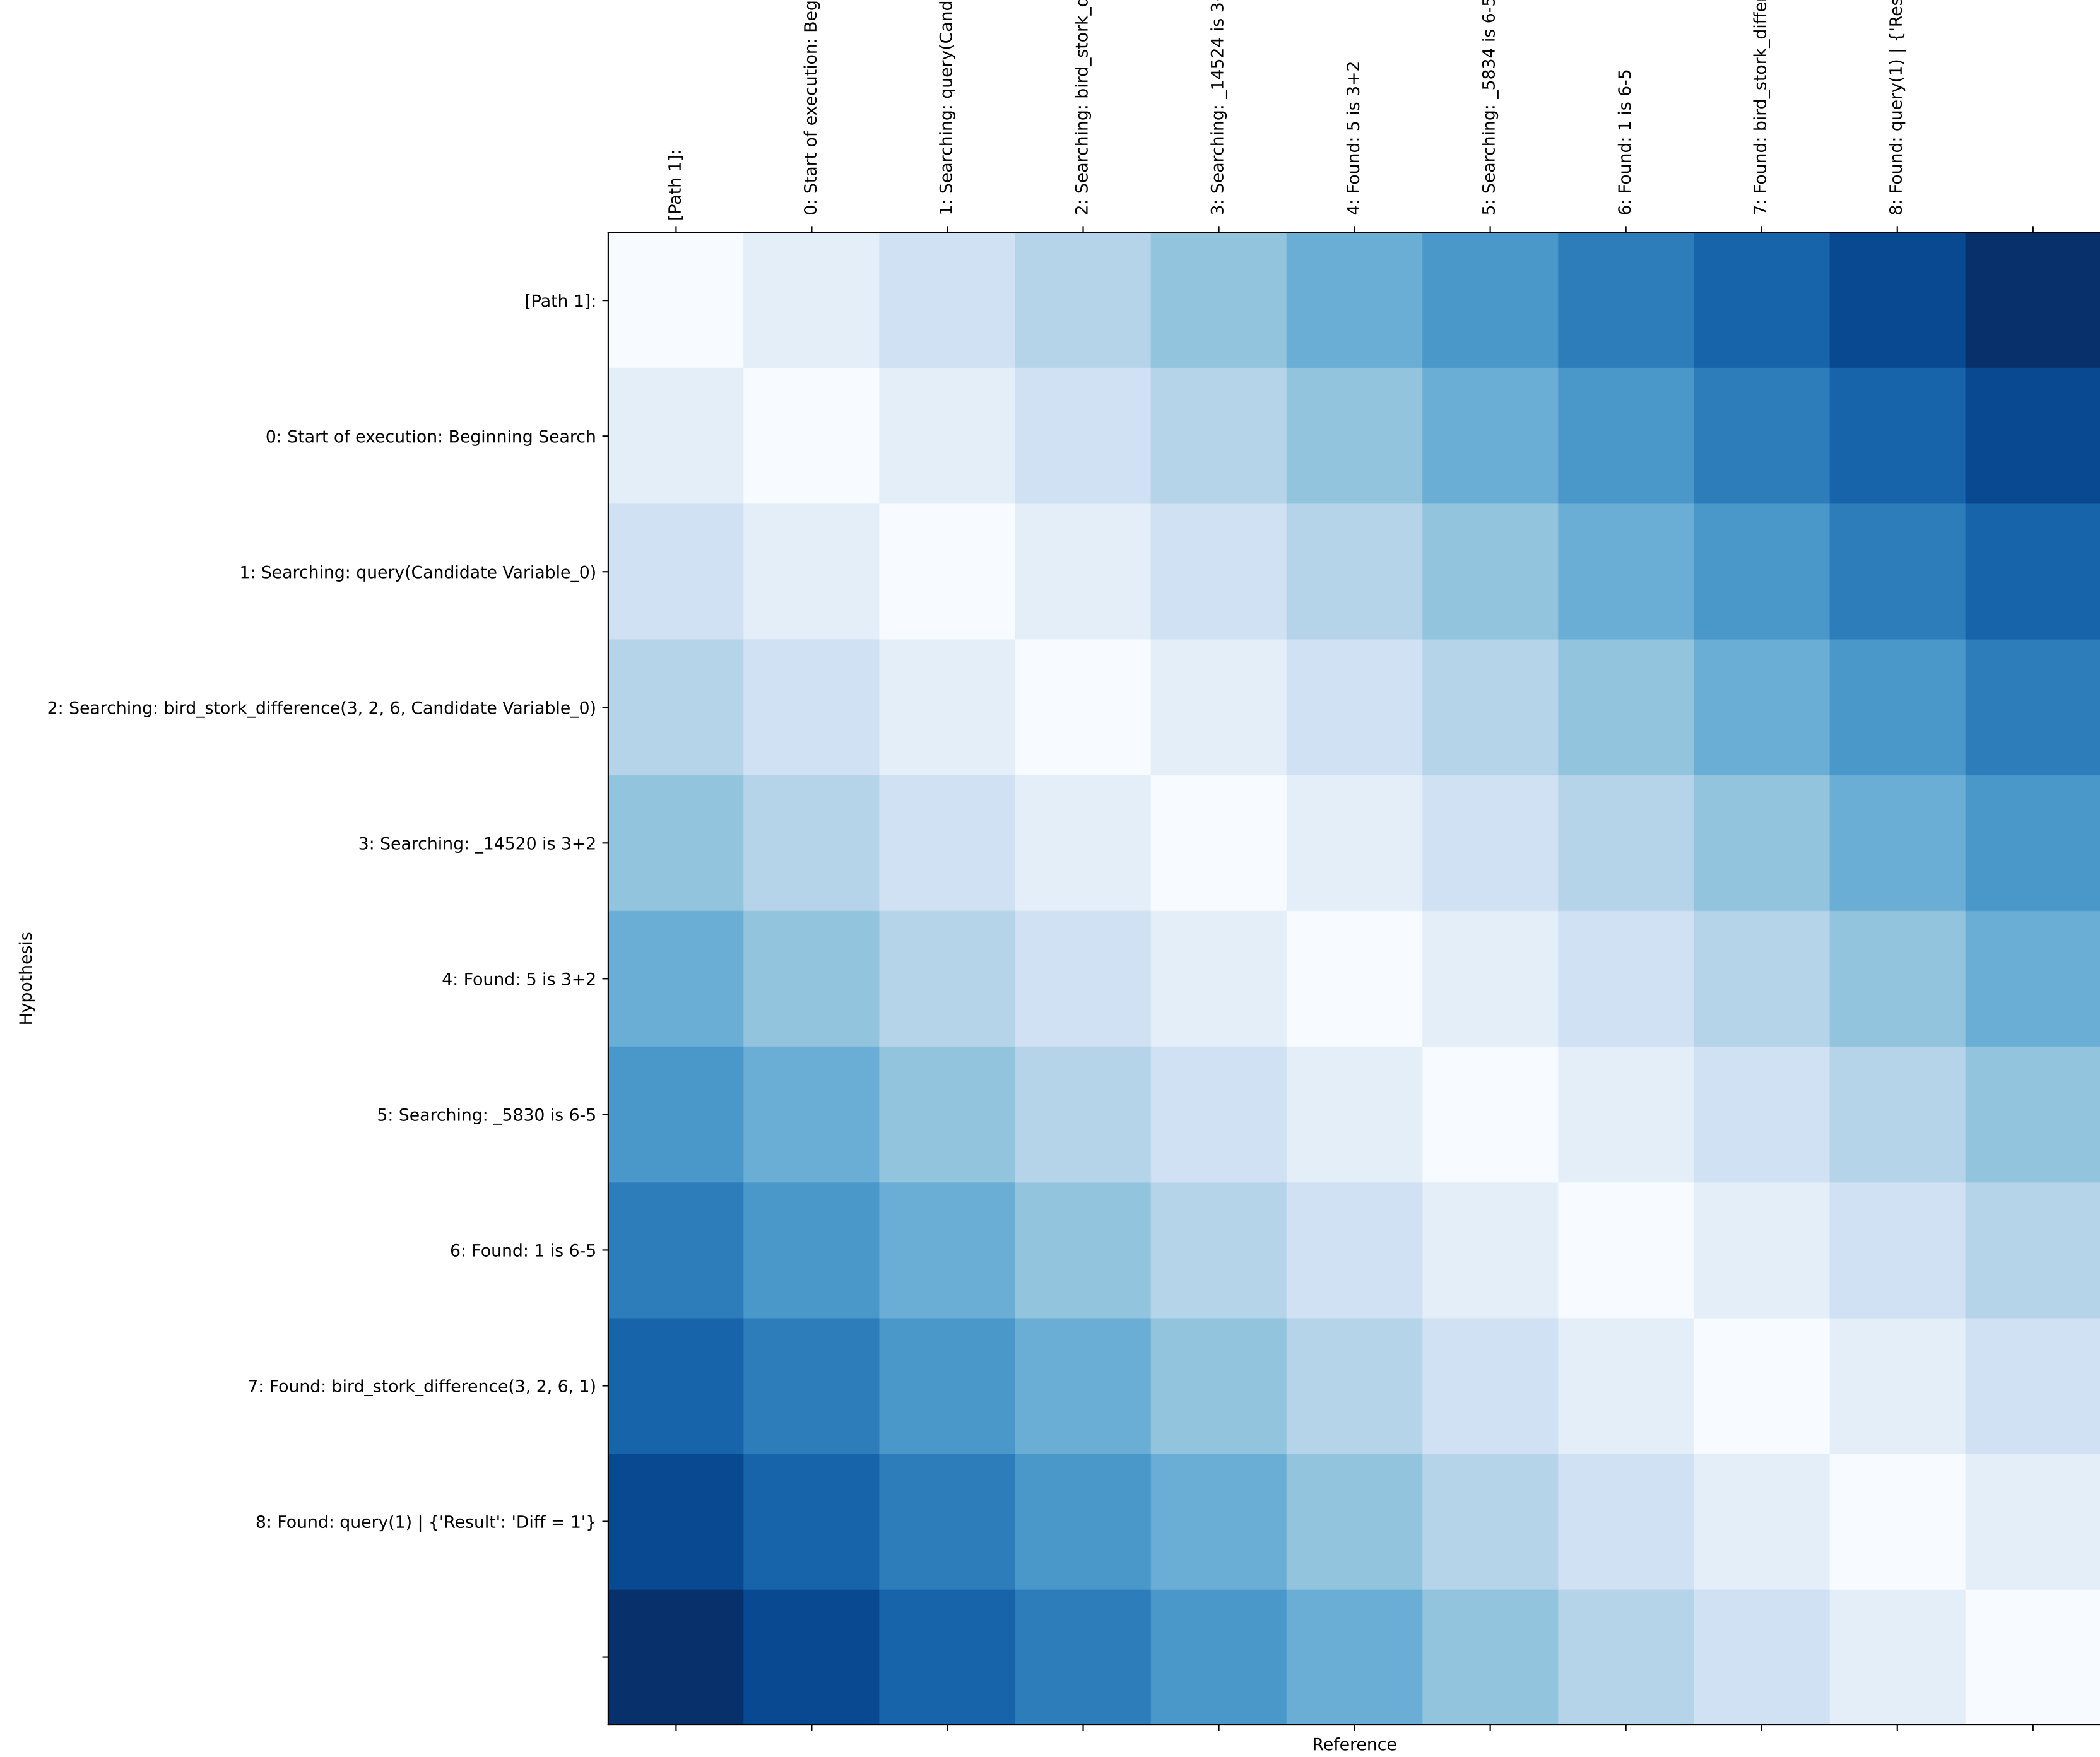

Supplement: supplementary_material [file attachment]

Hypothesis

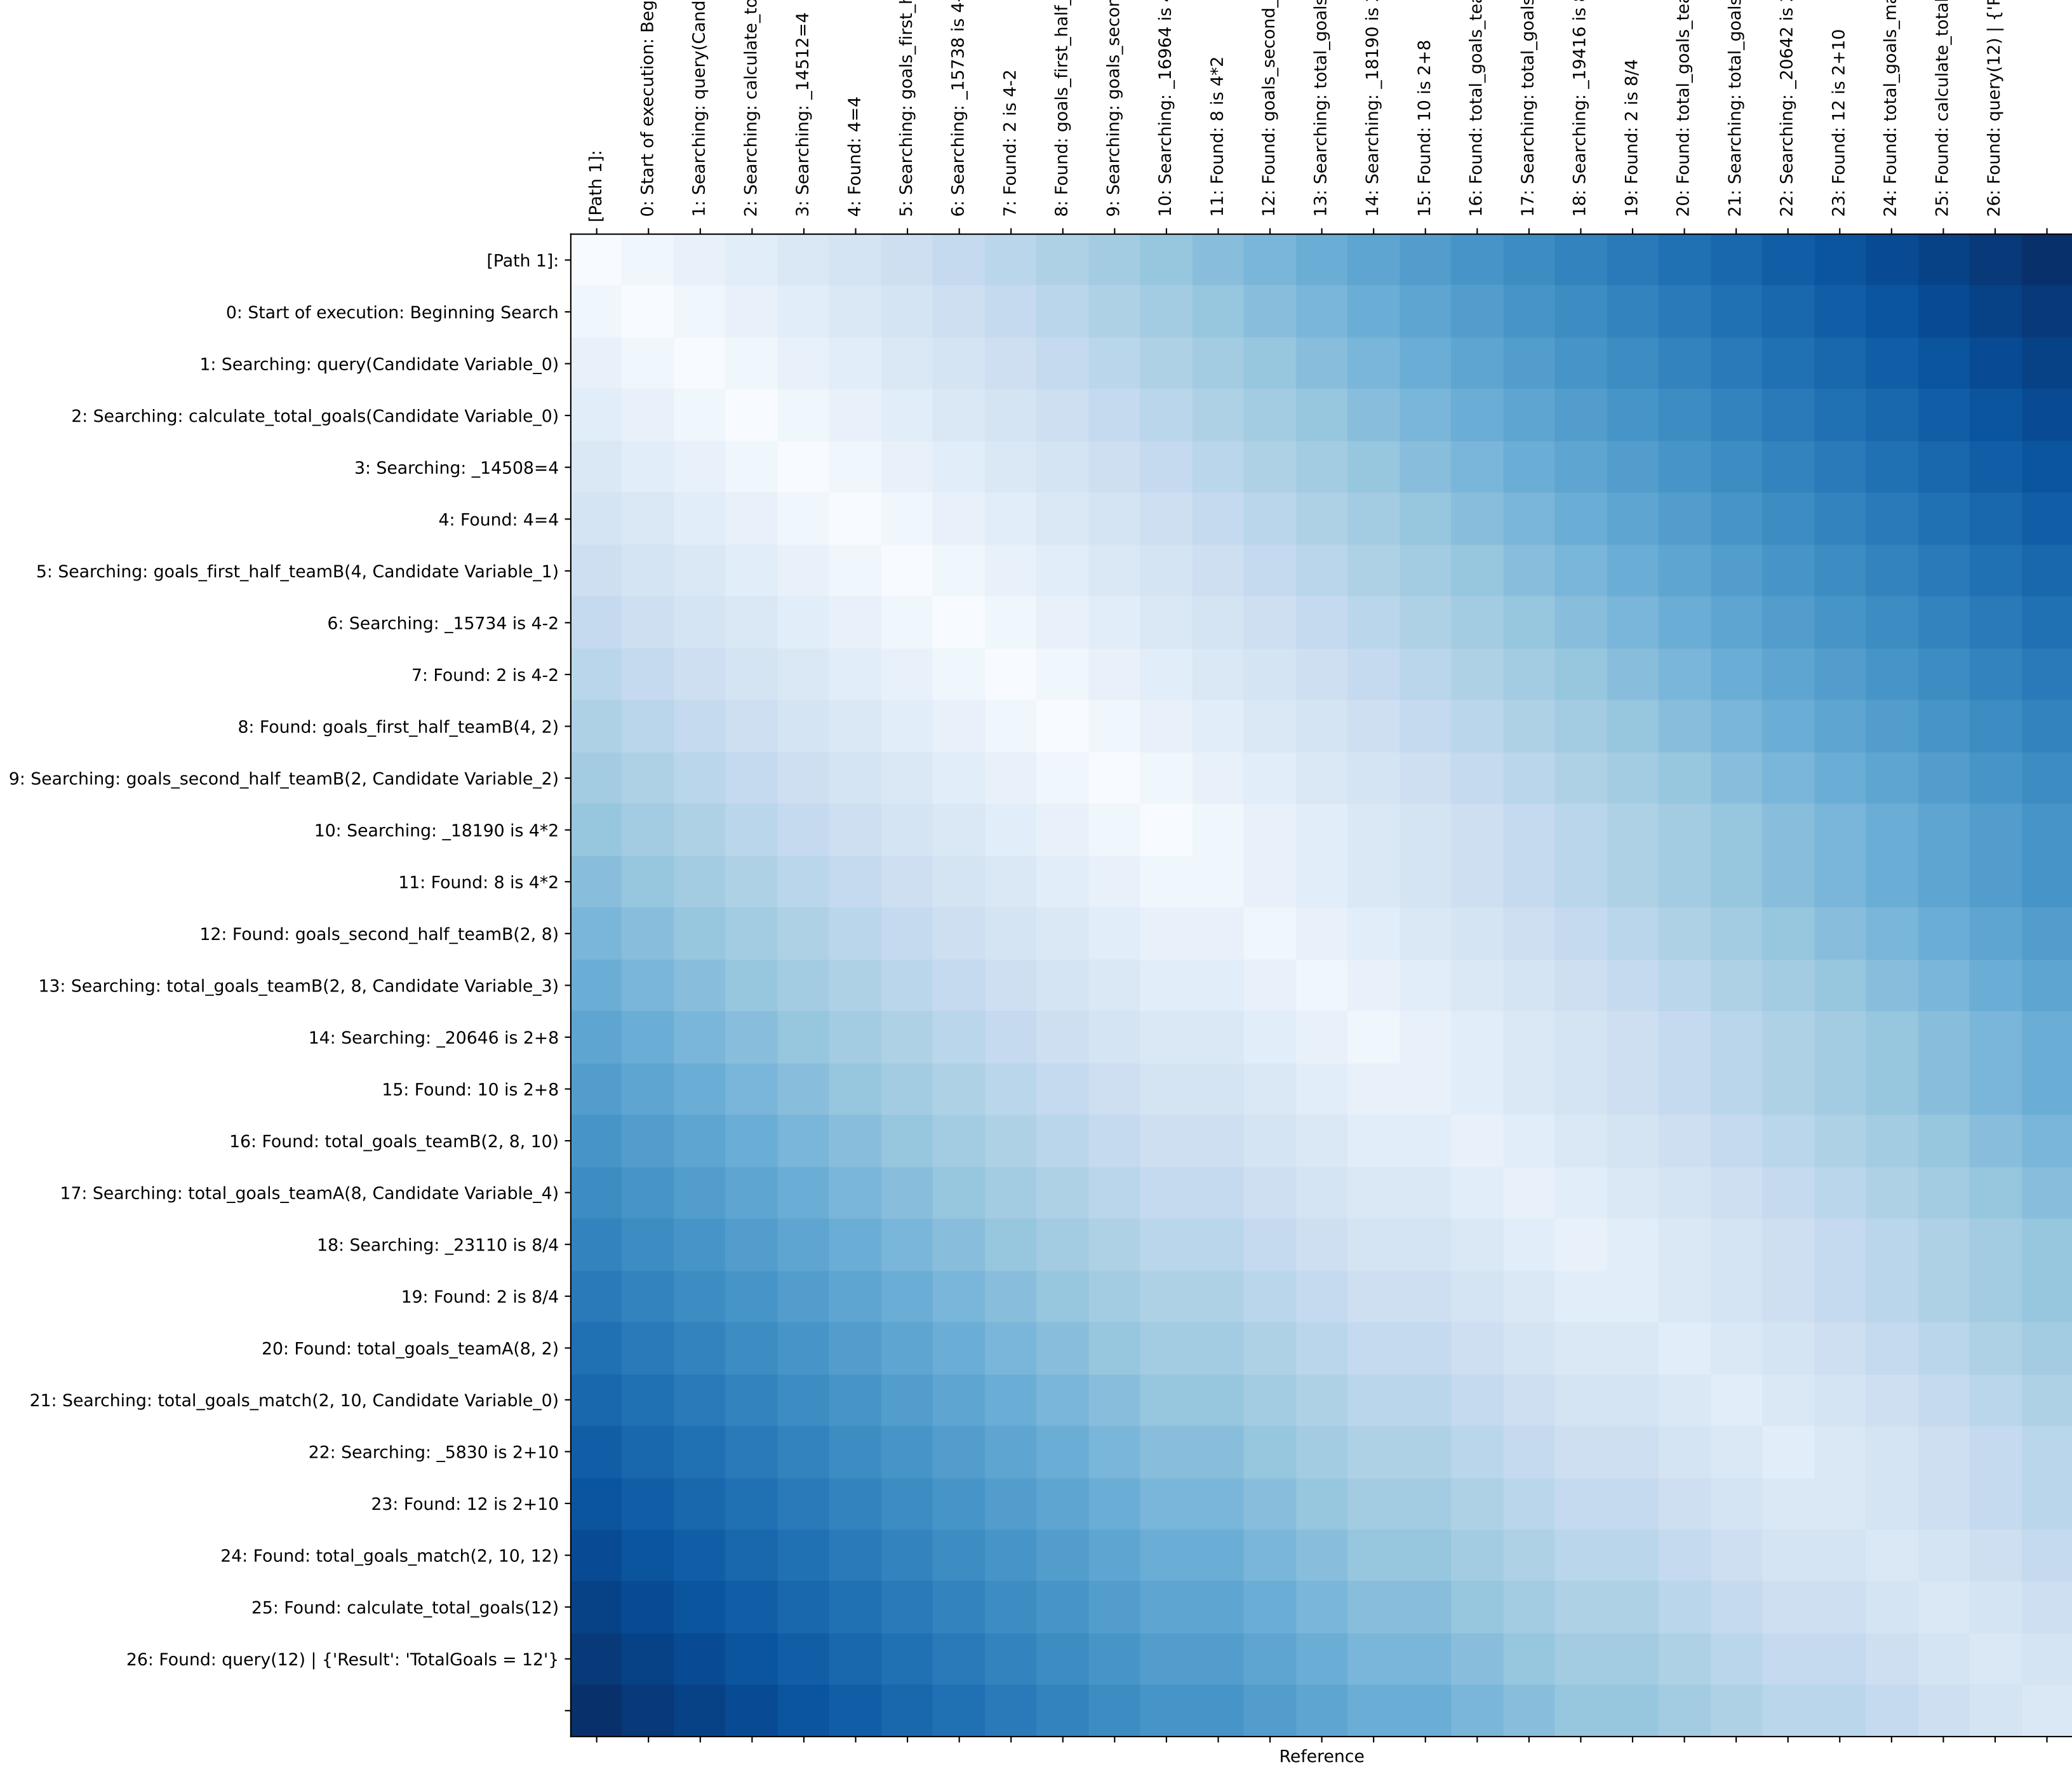

Supplement: supplementary_material [file attachment]

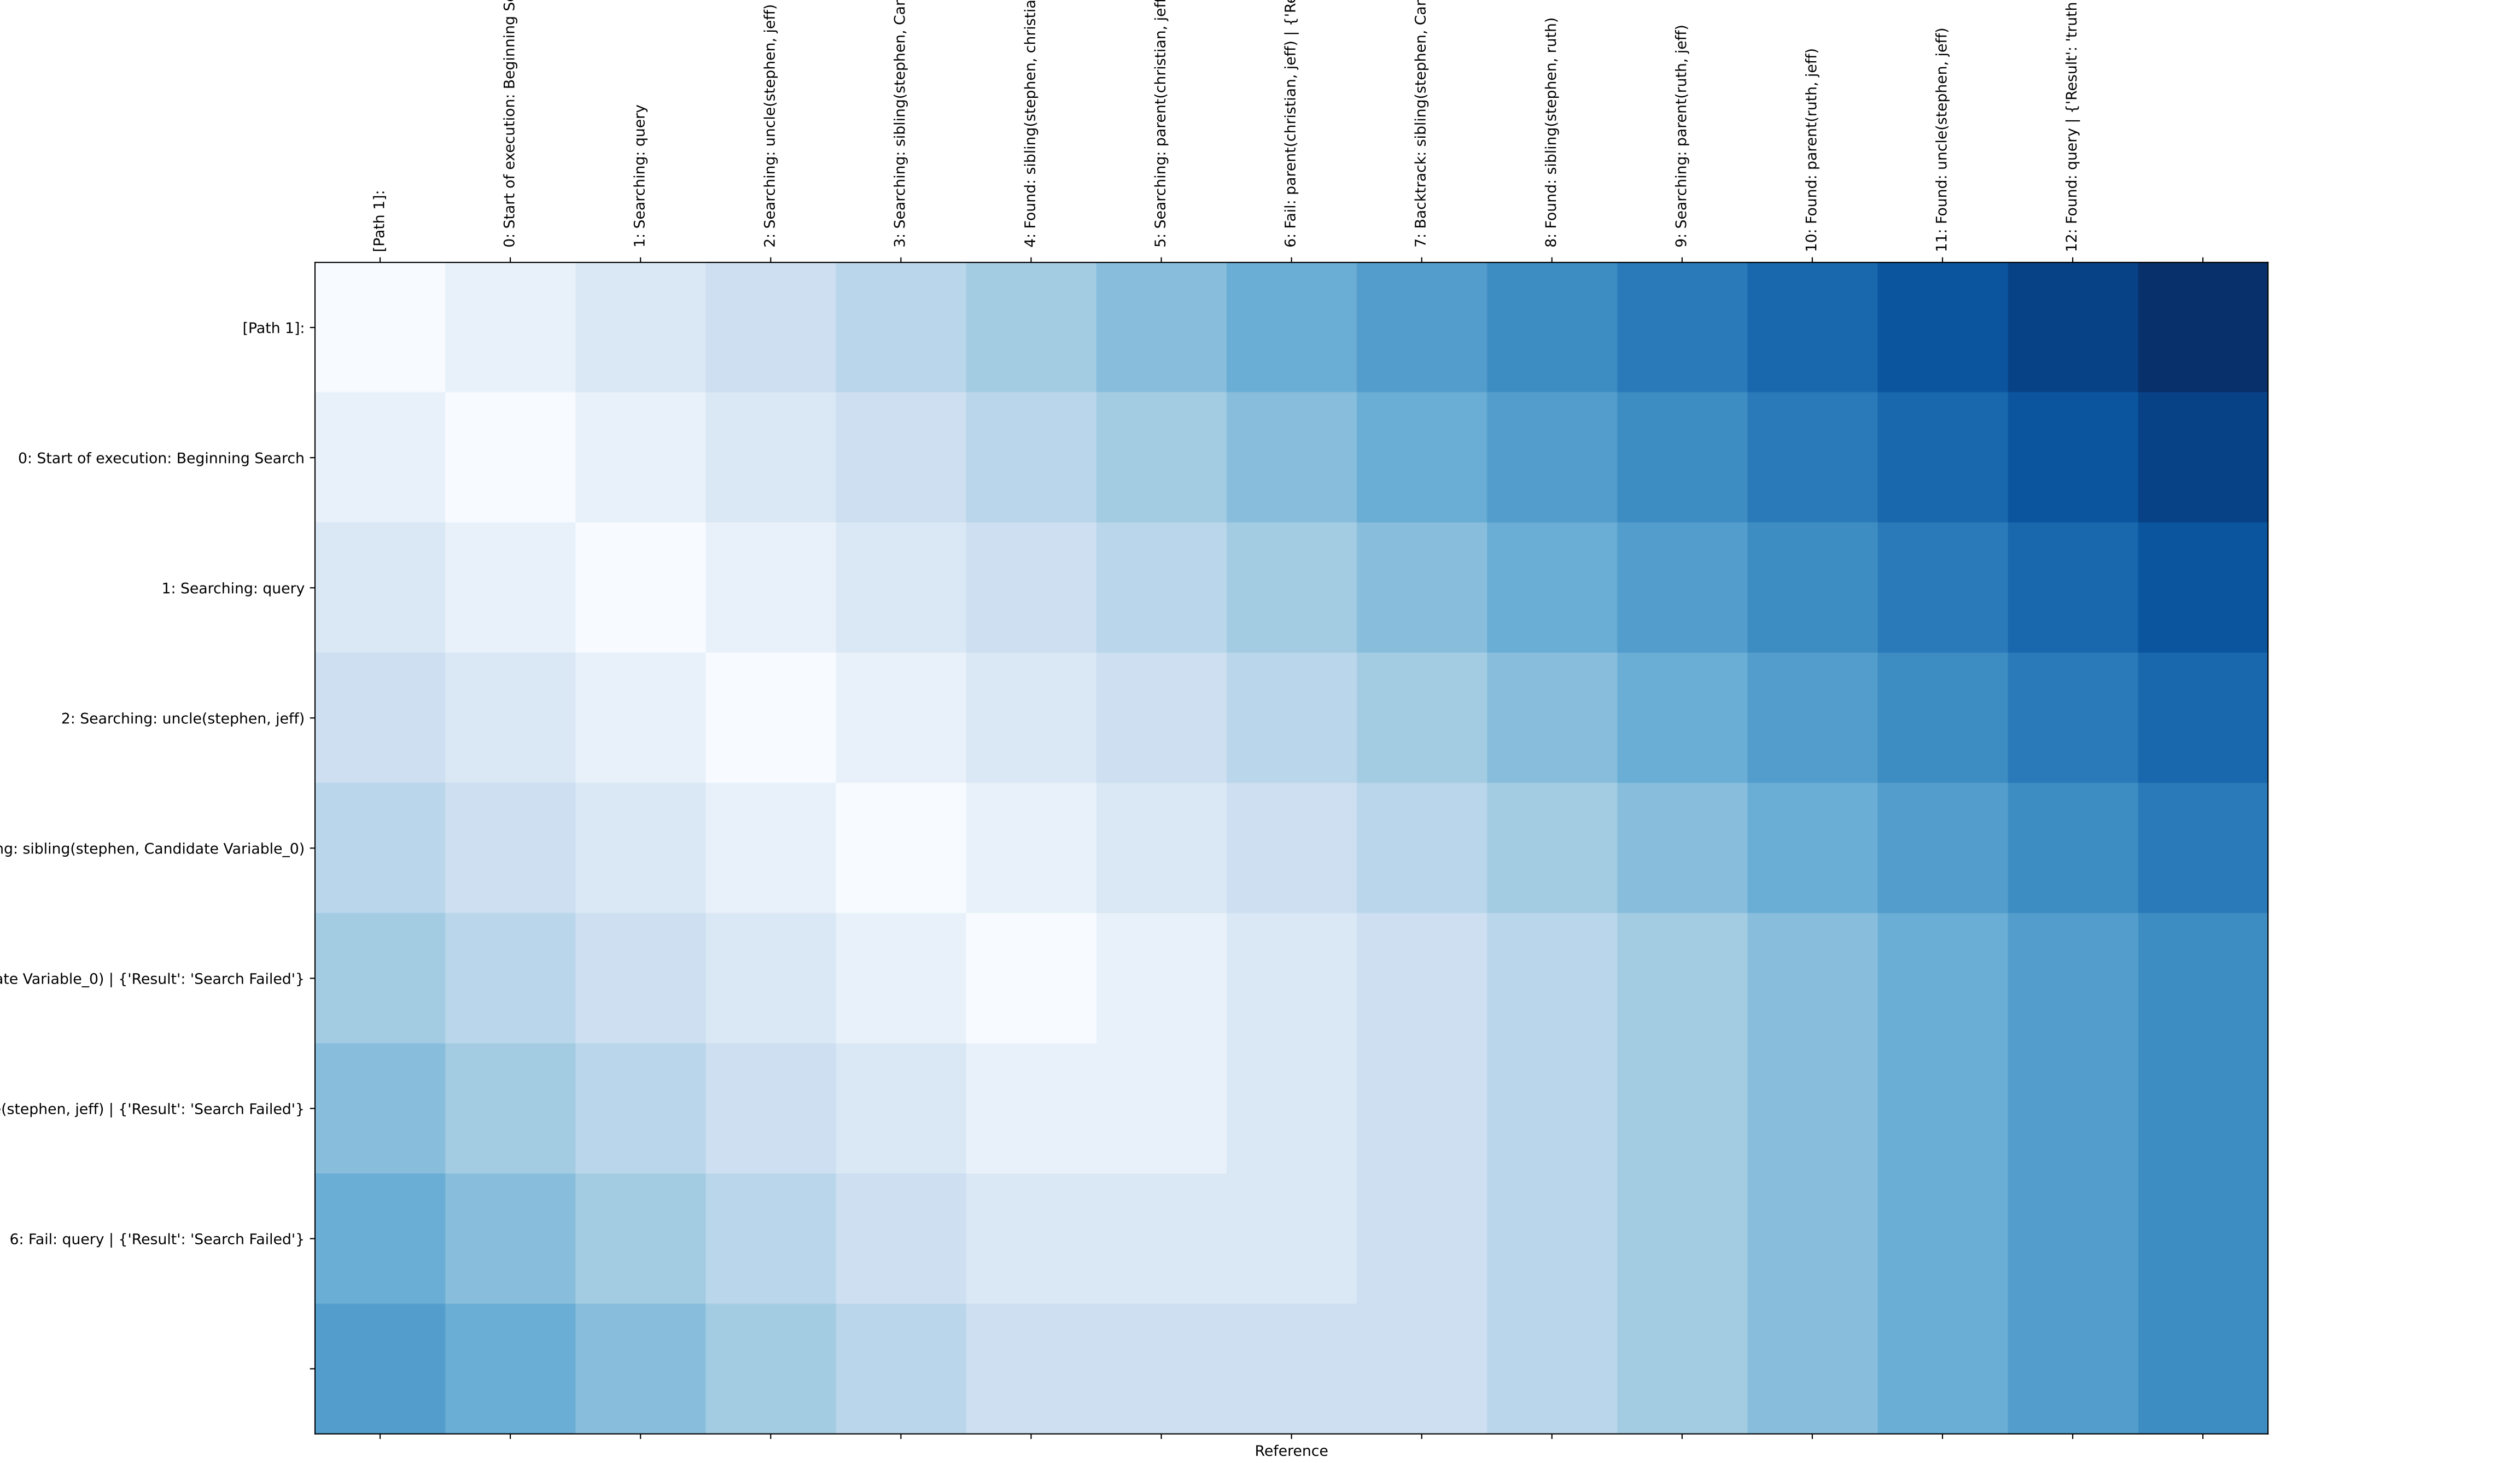

Supplement: supplementary_material [file attachment]

Hypothesis

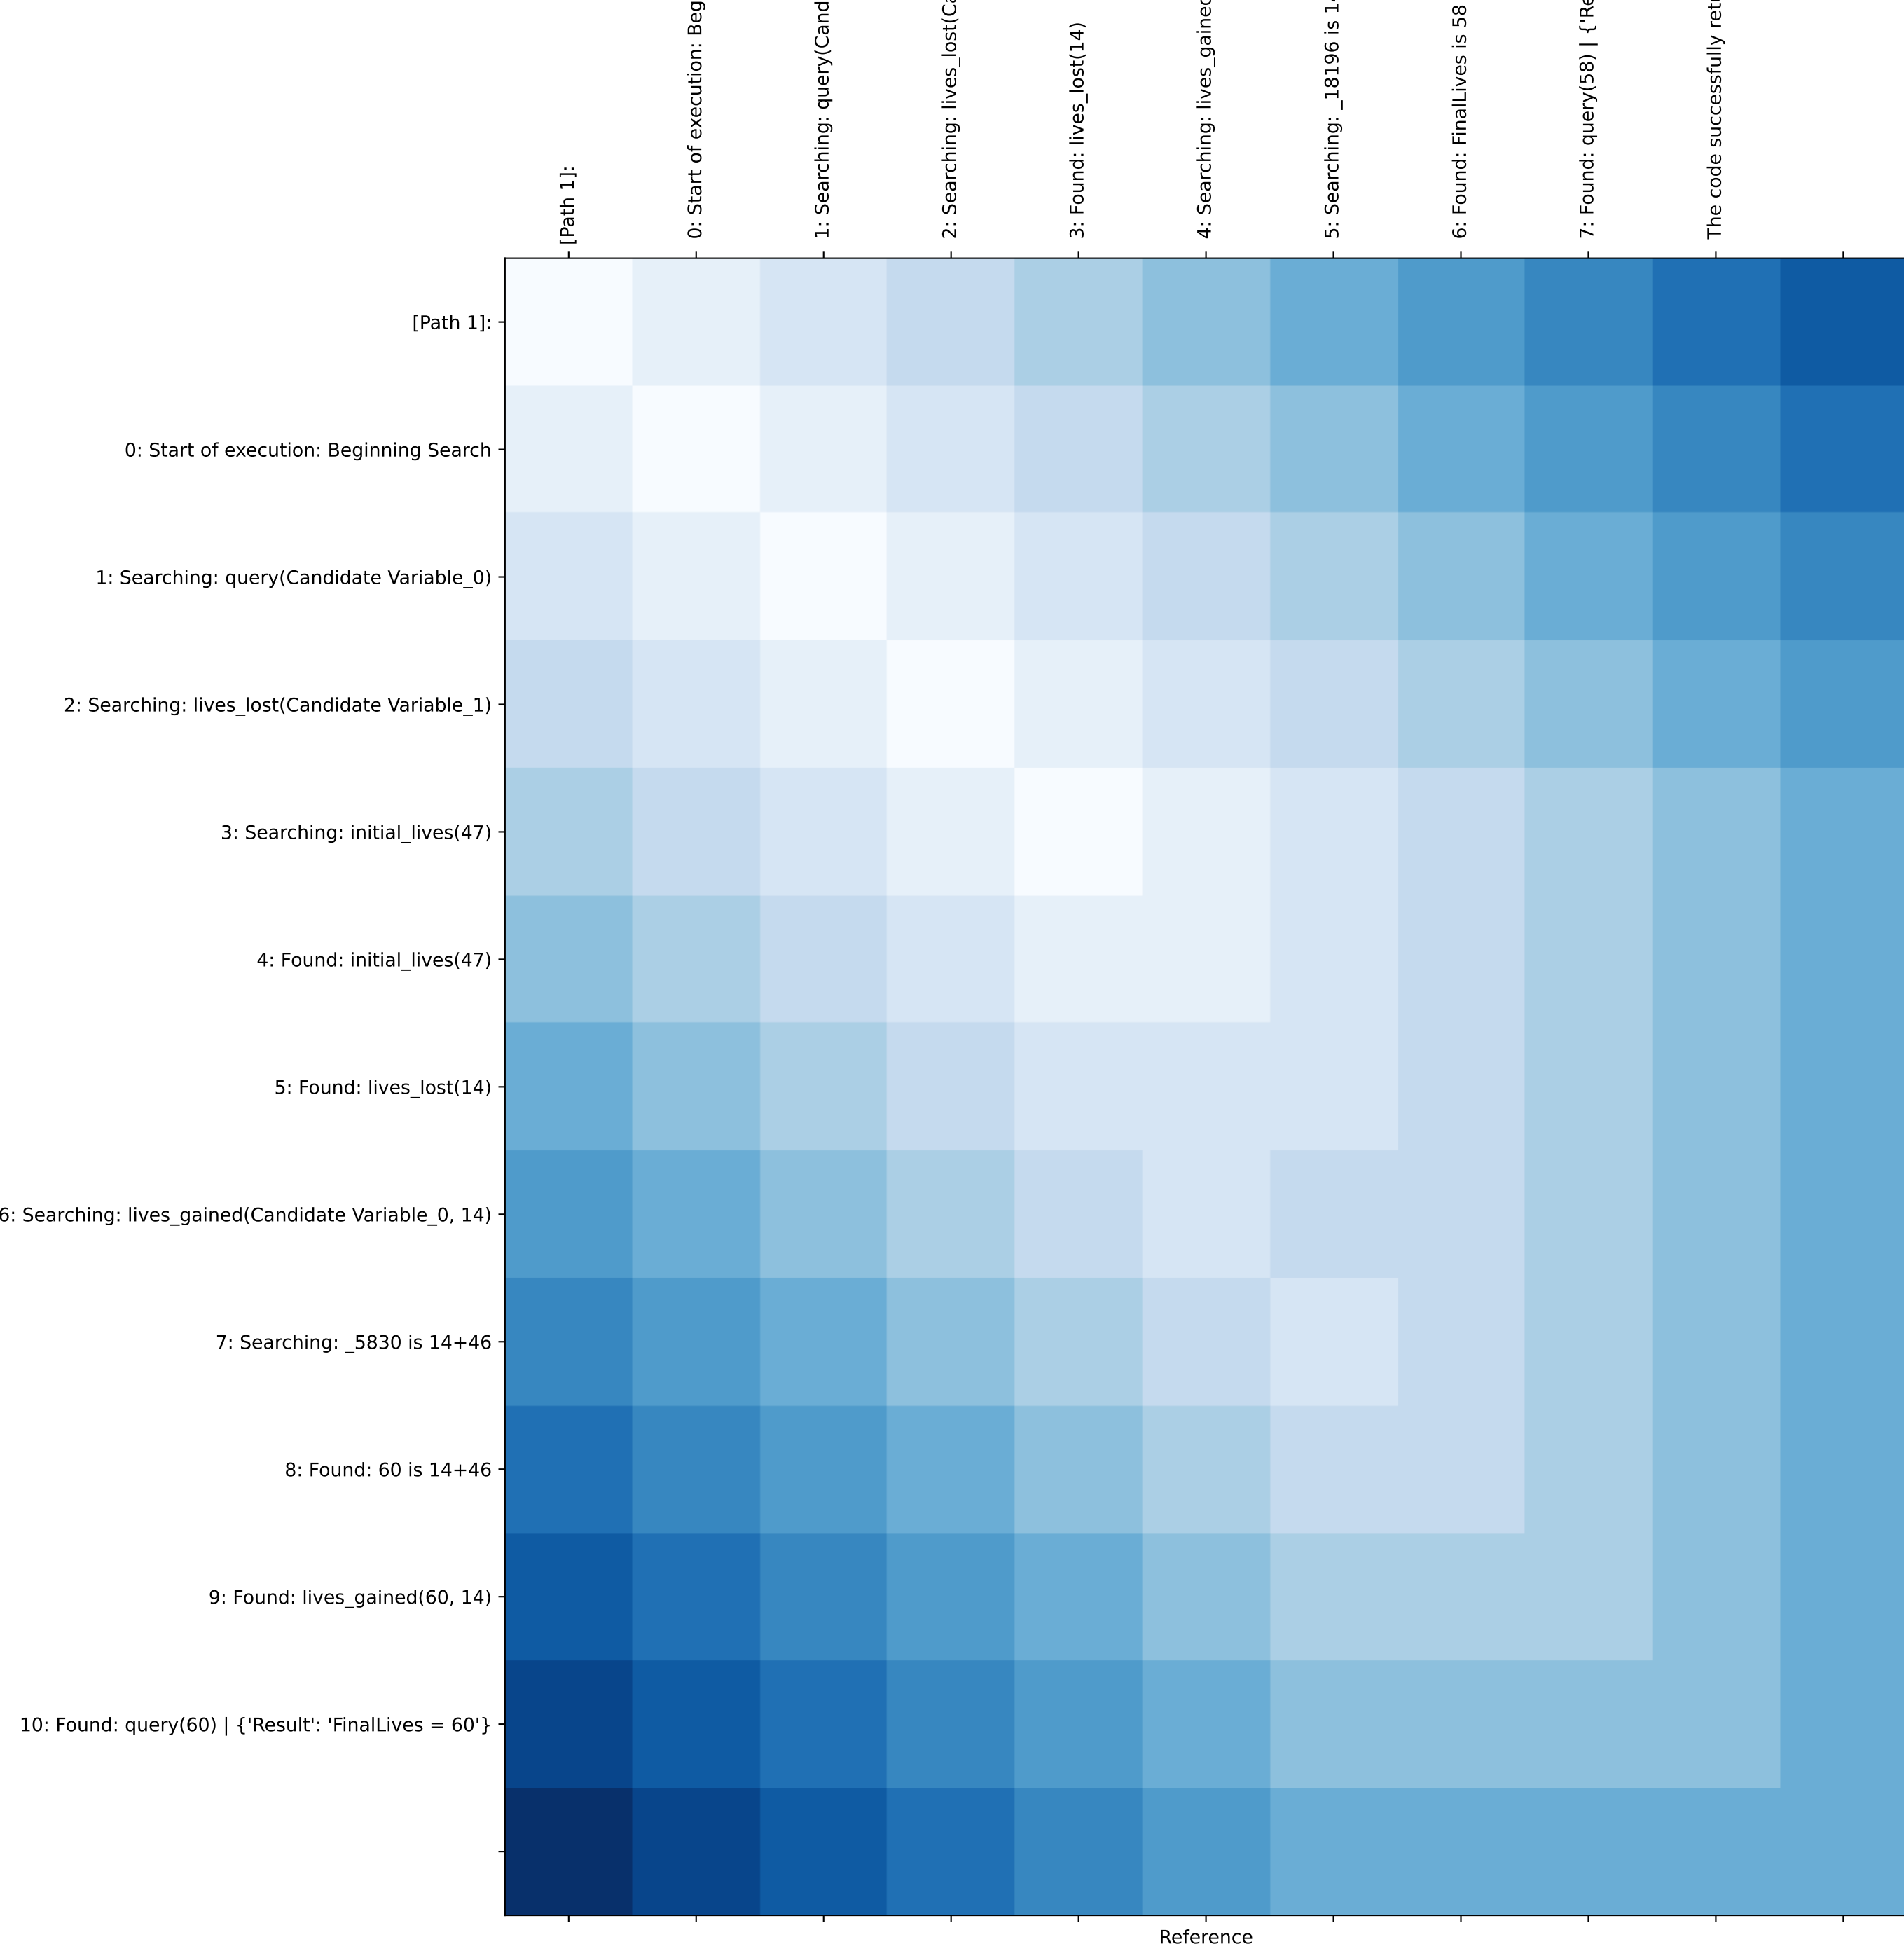

Supplement: supplementary_material [file attachment]

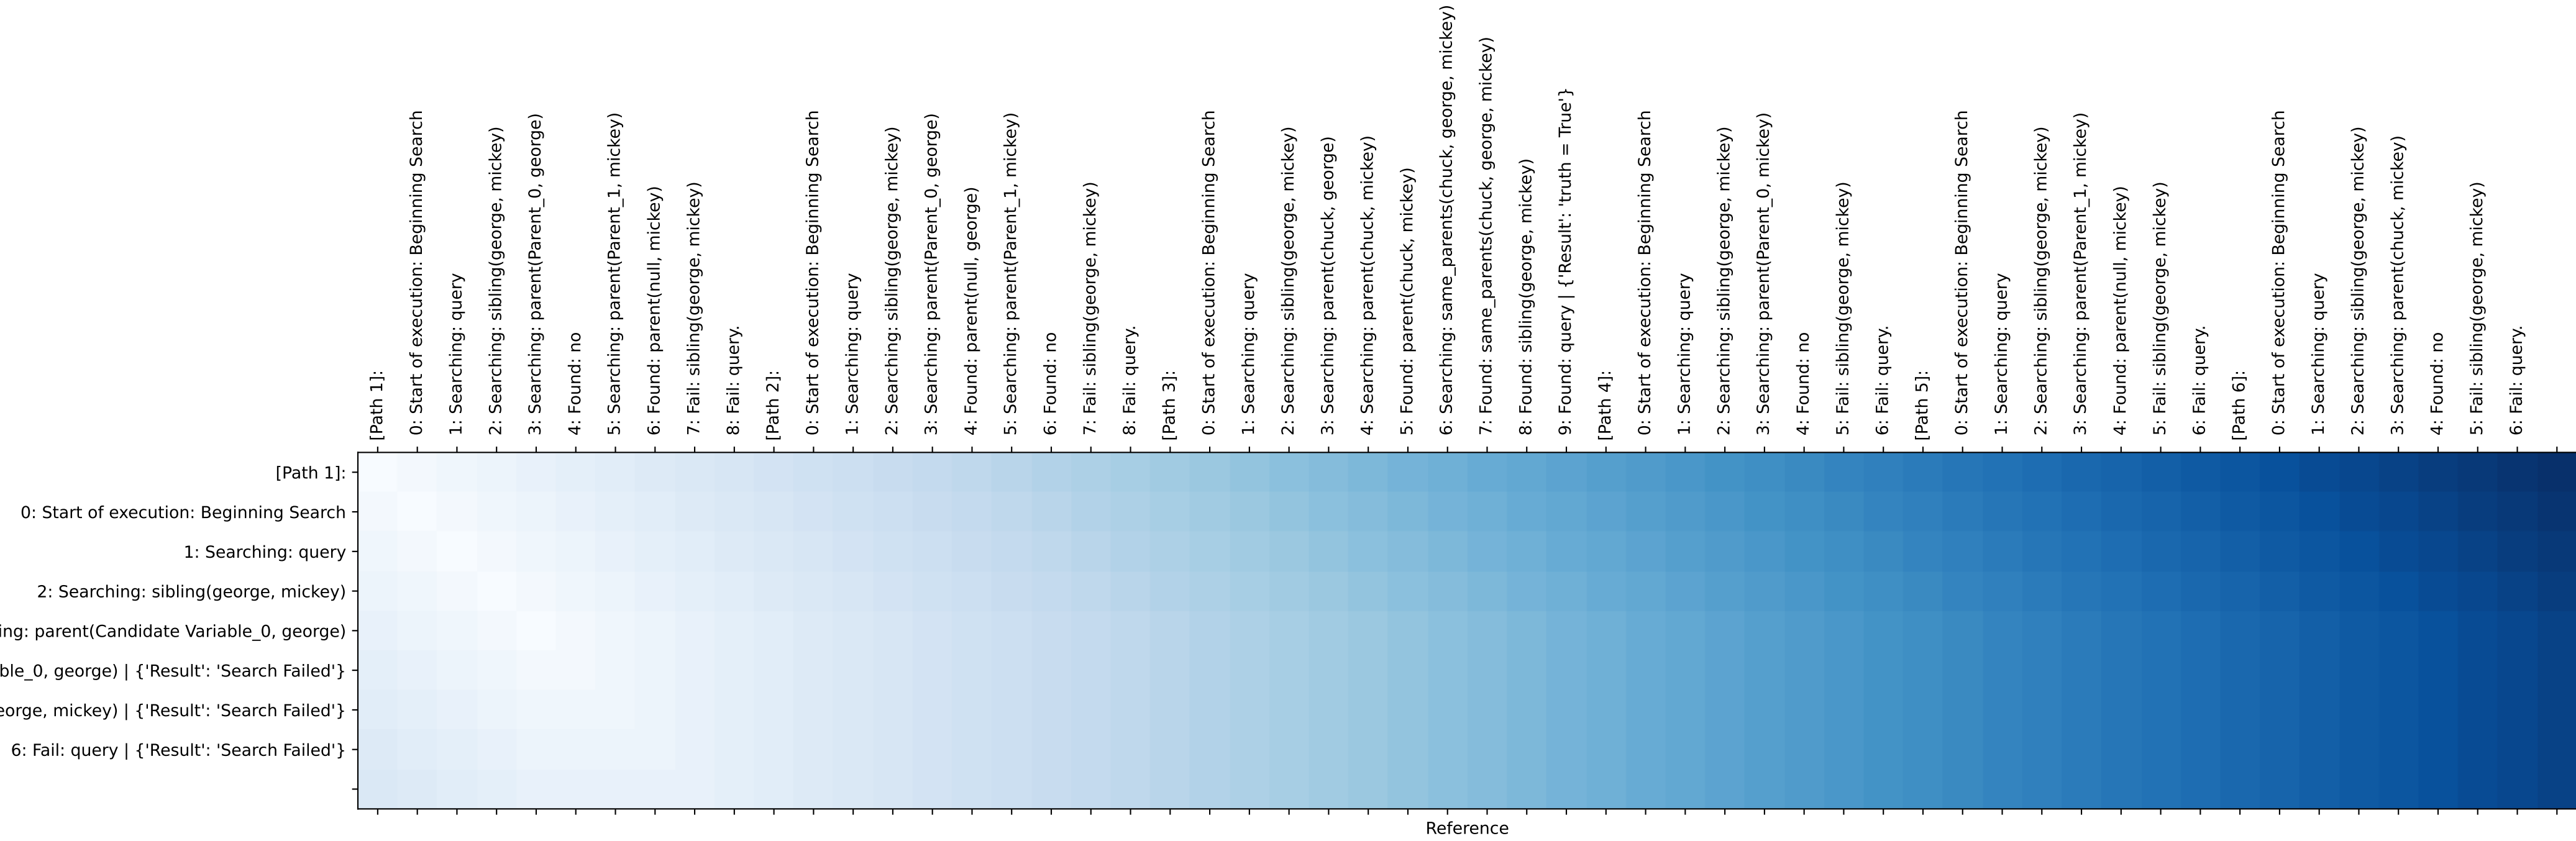

Supplement: supplementary_material [file attachment]

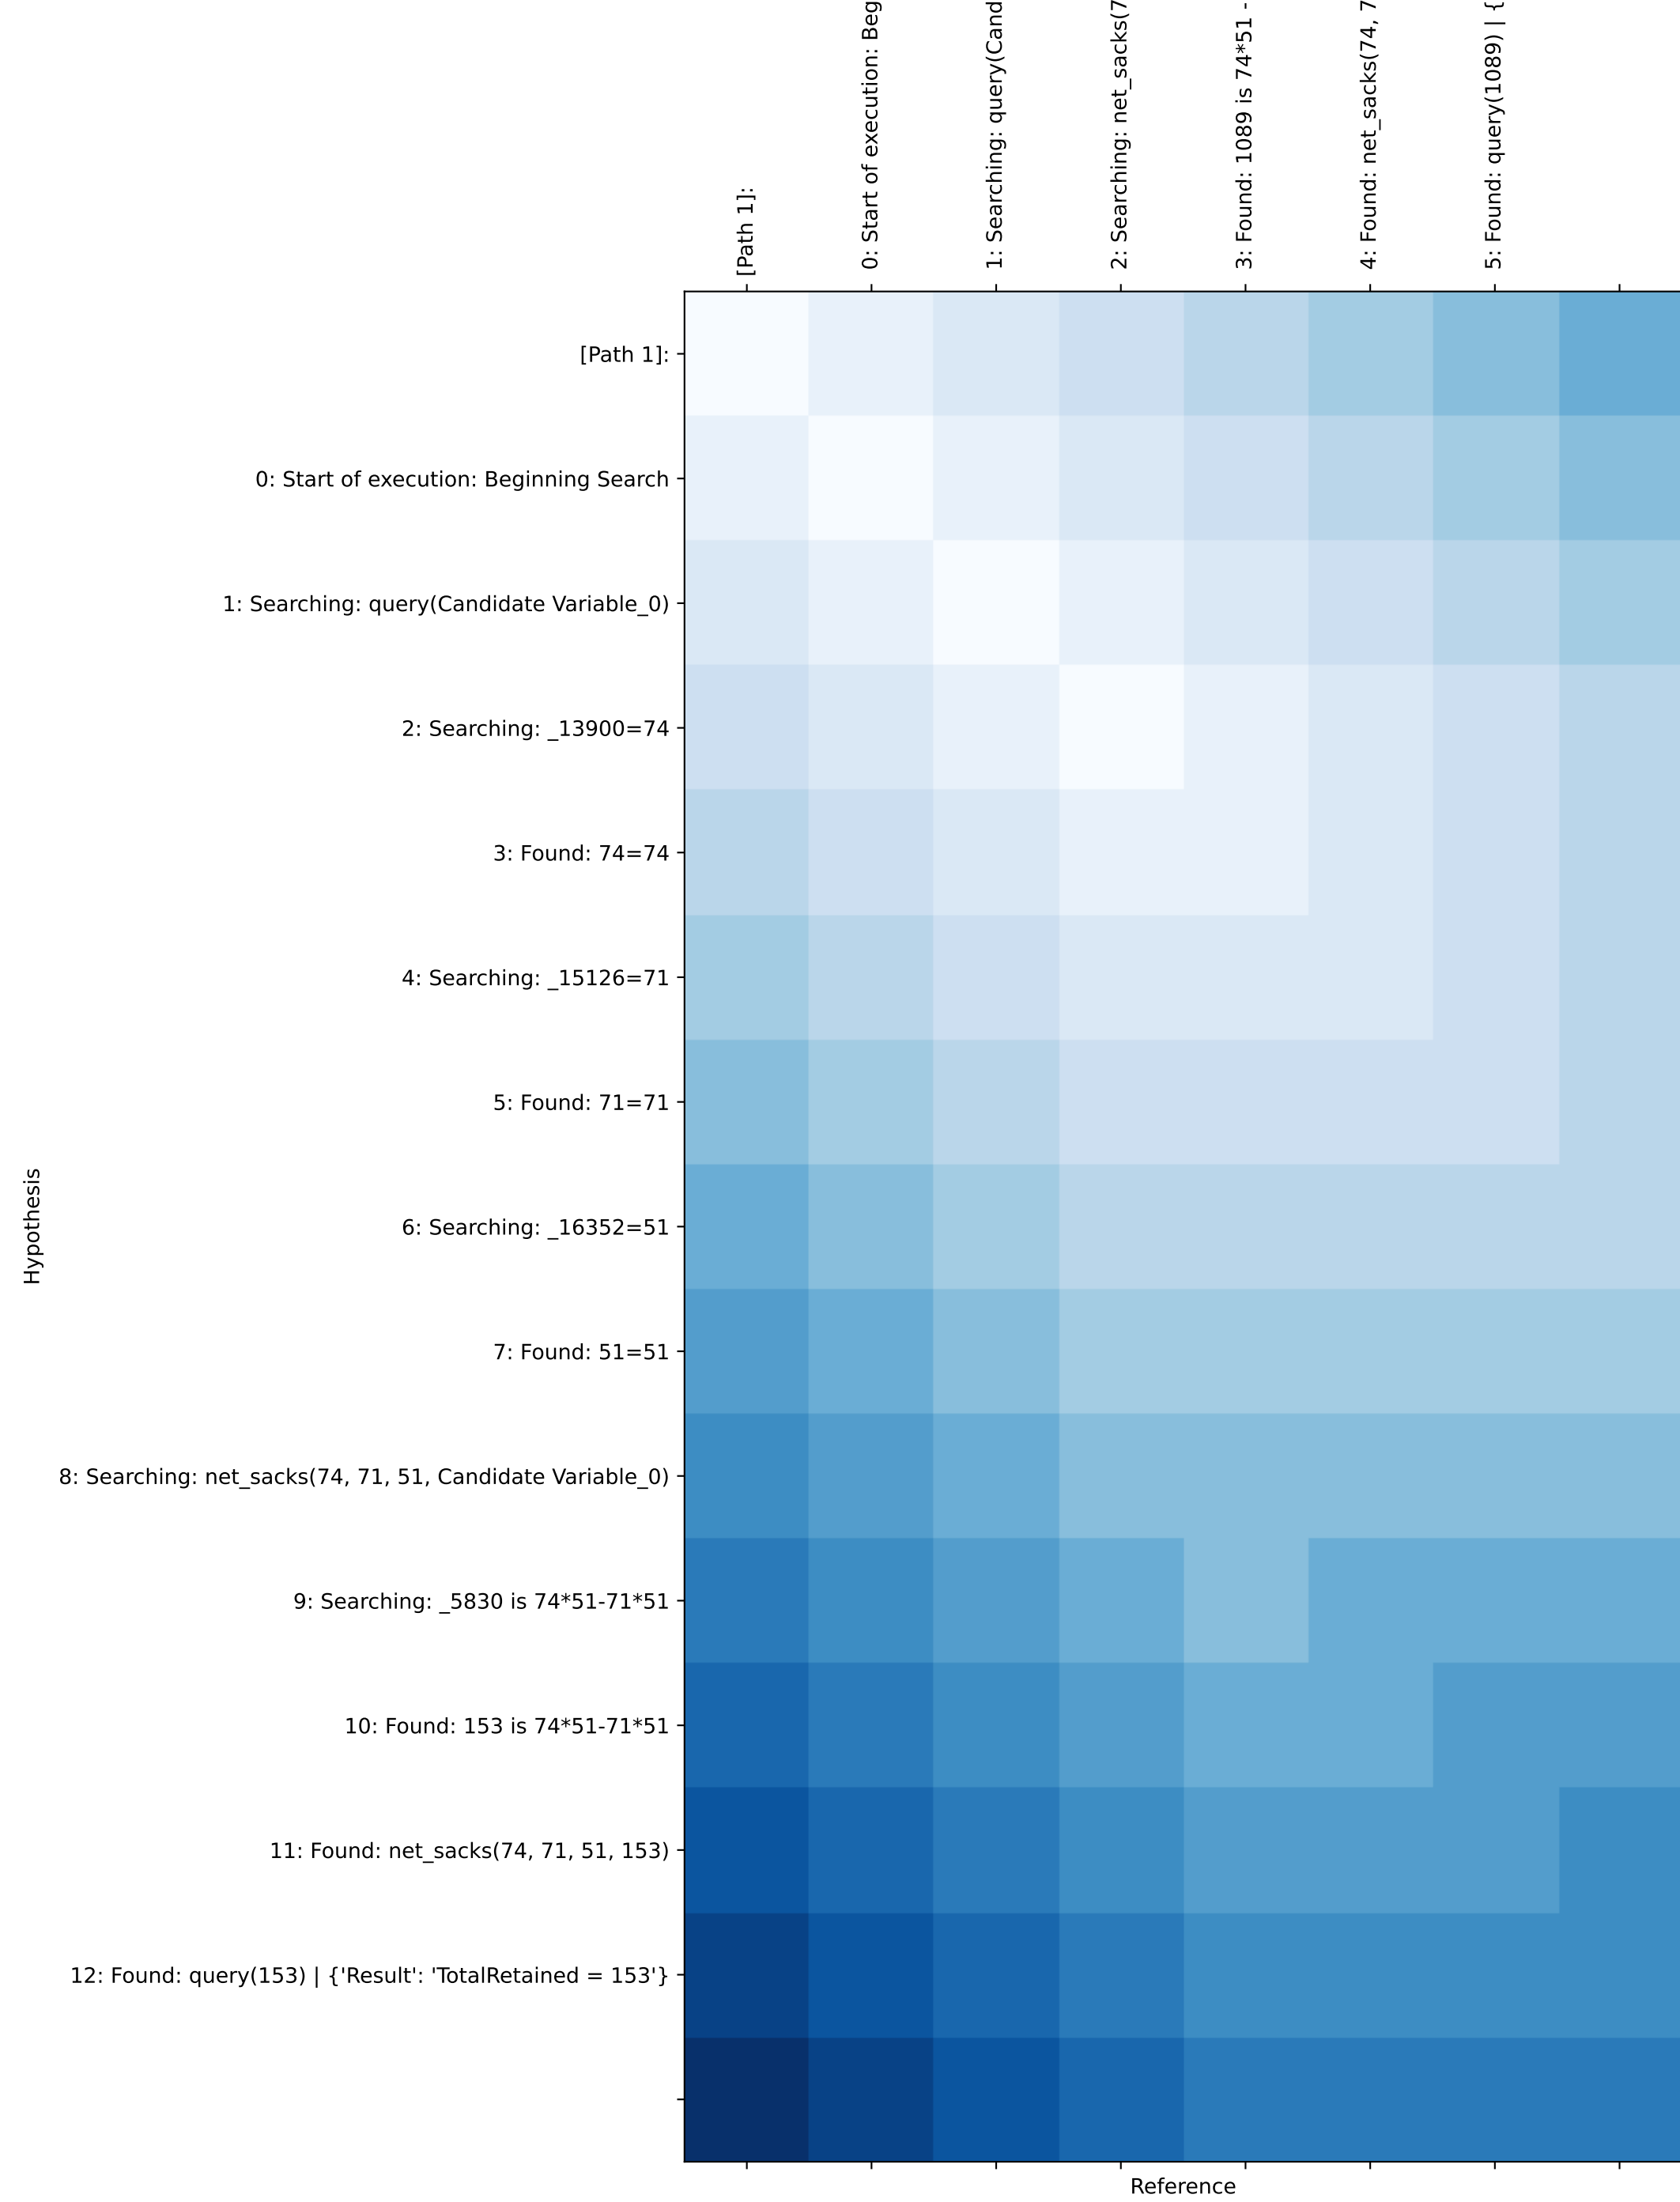

Supplement: supplementary_material [file attachment]

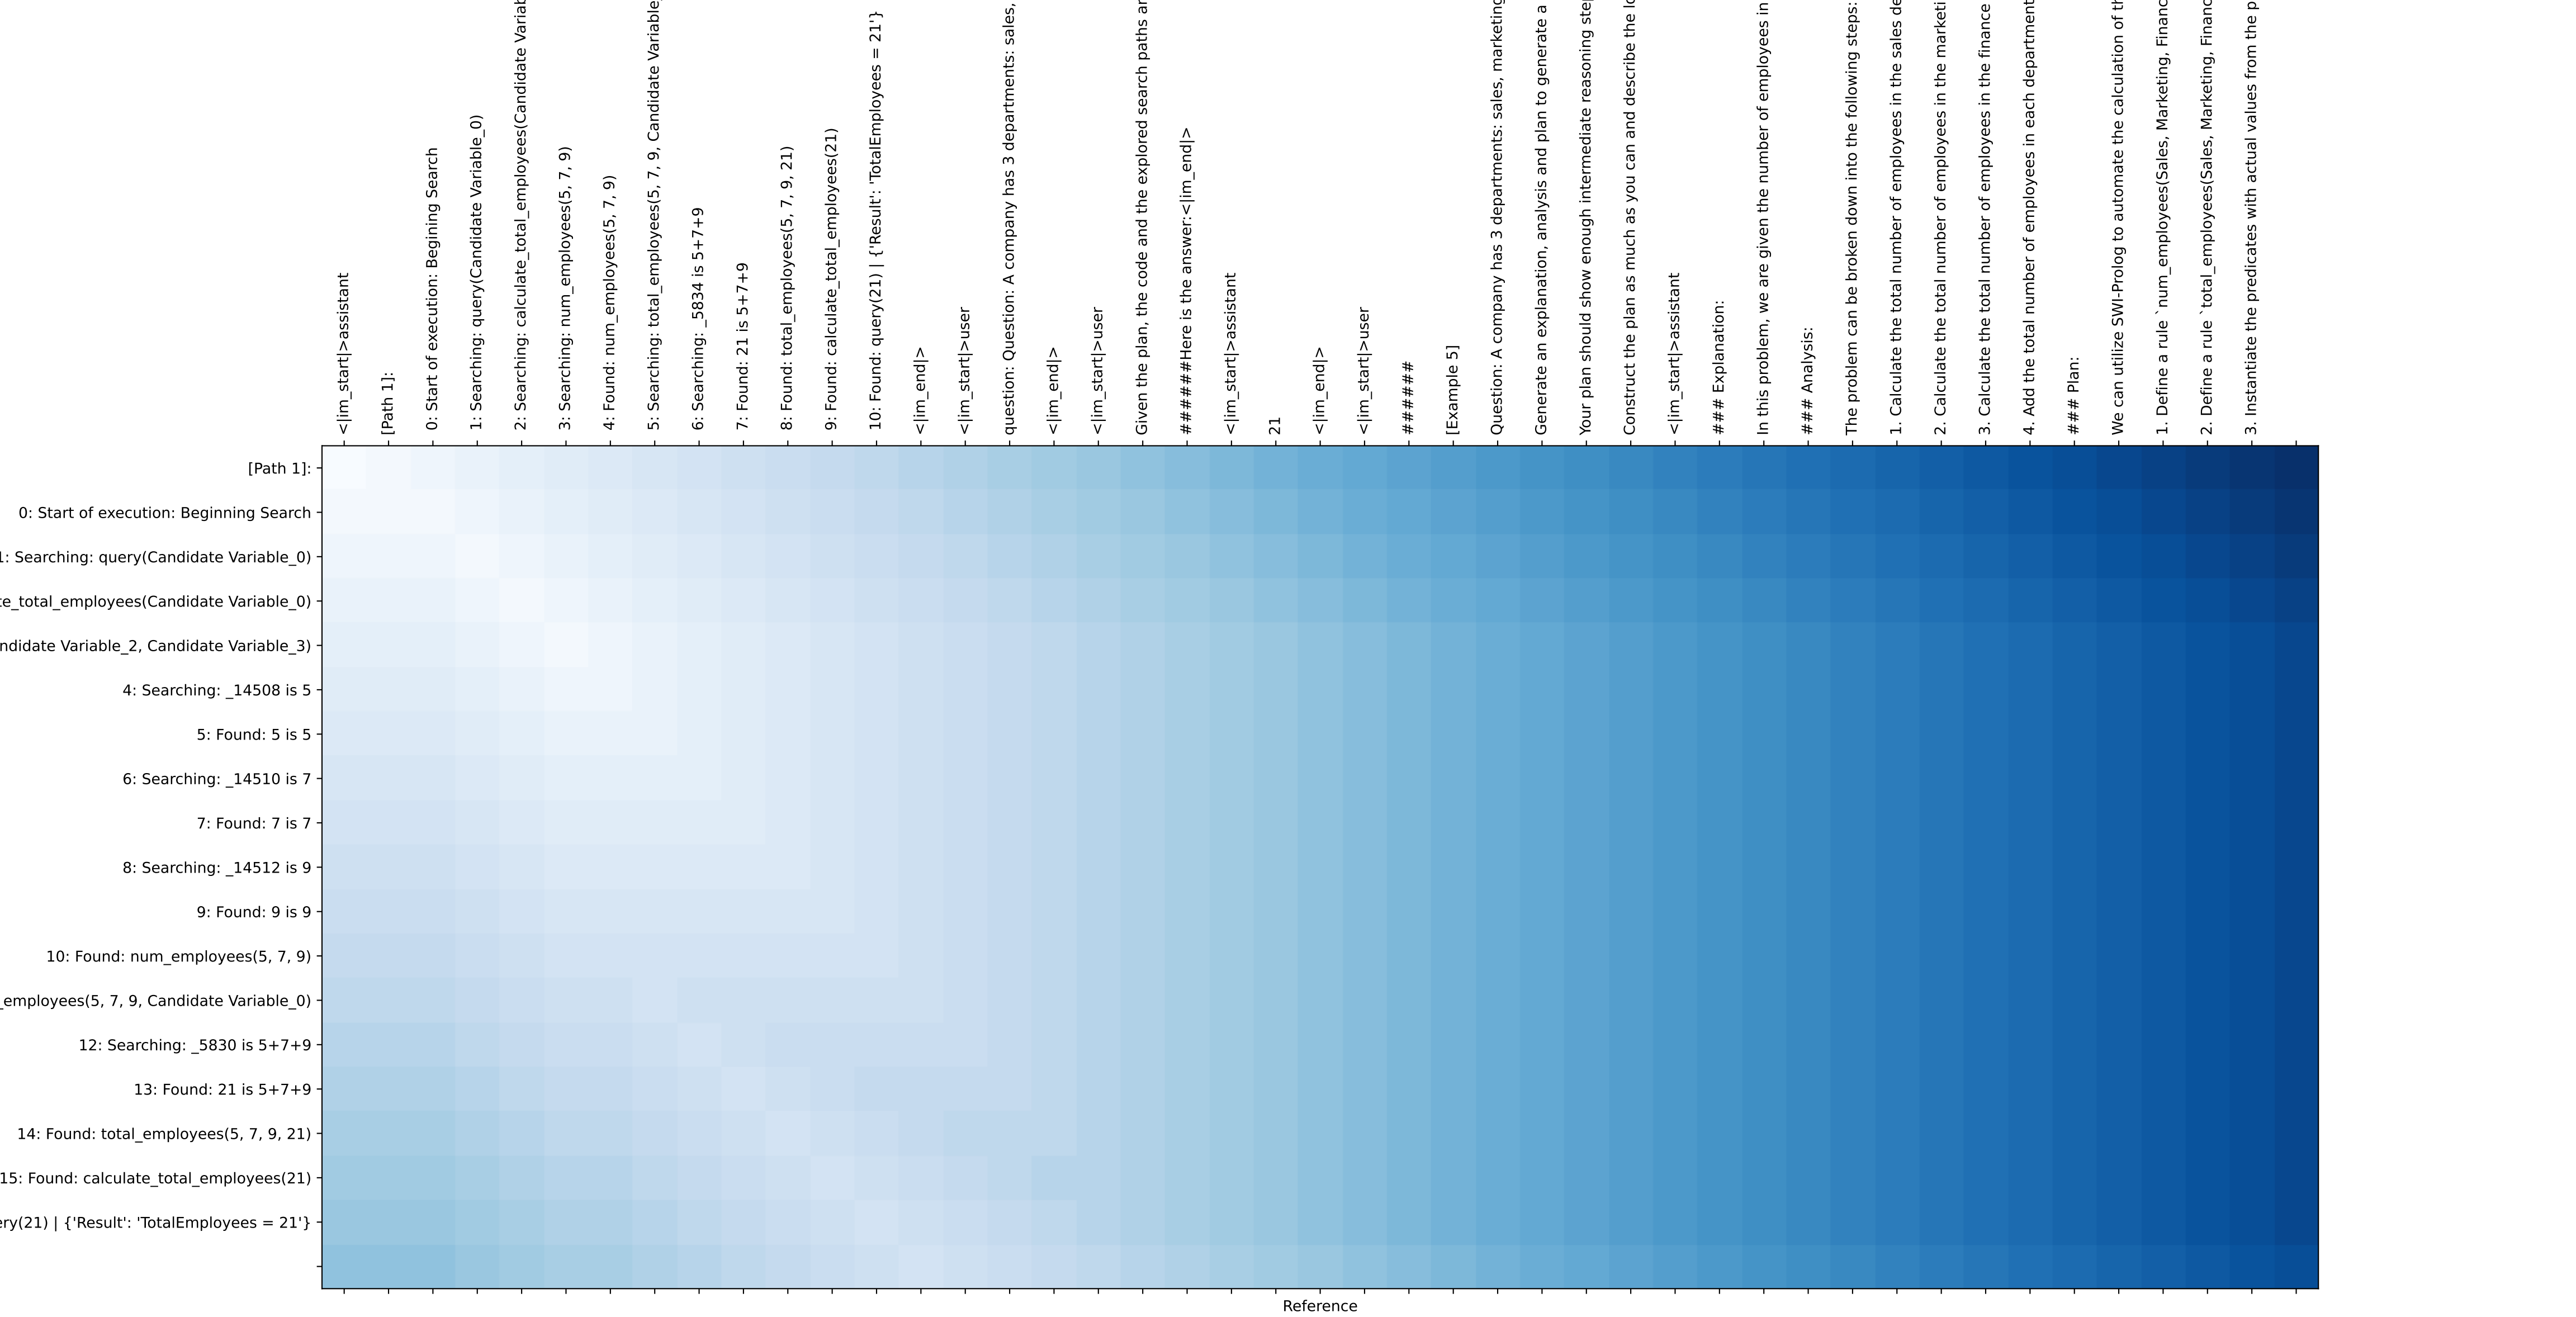

Supplement: supplementary_material [file attachment]

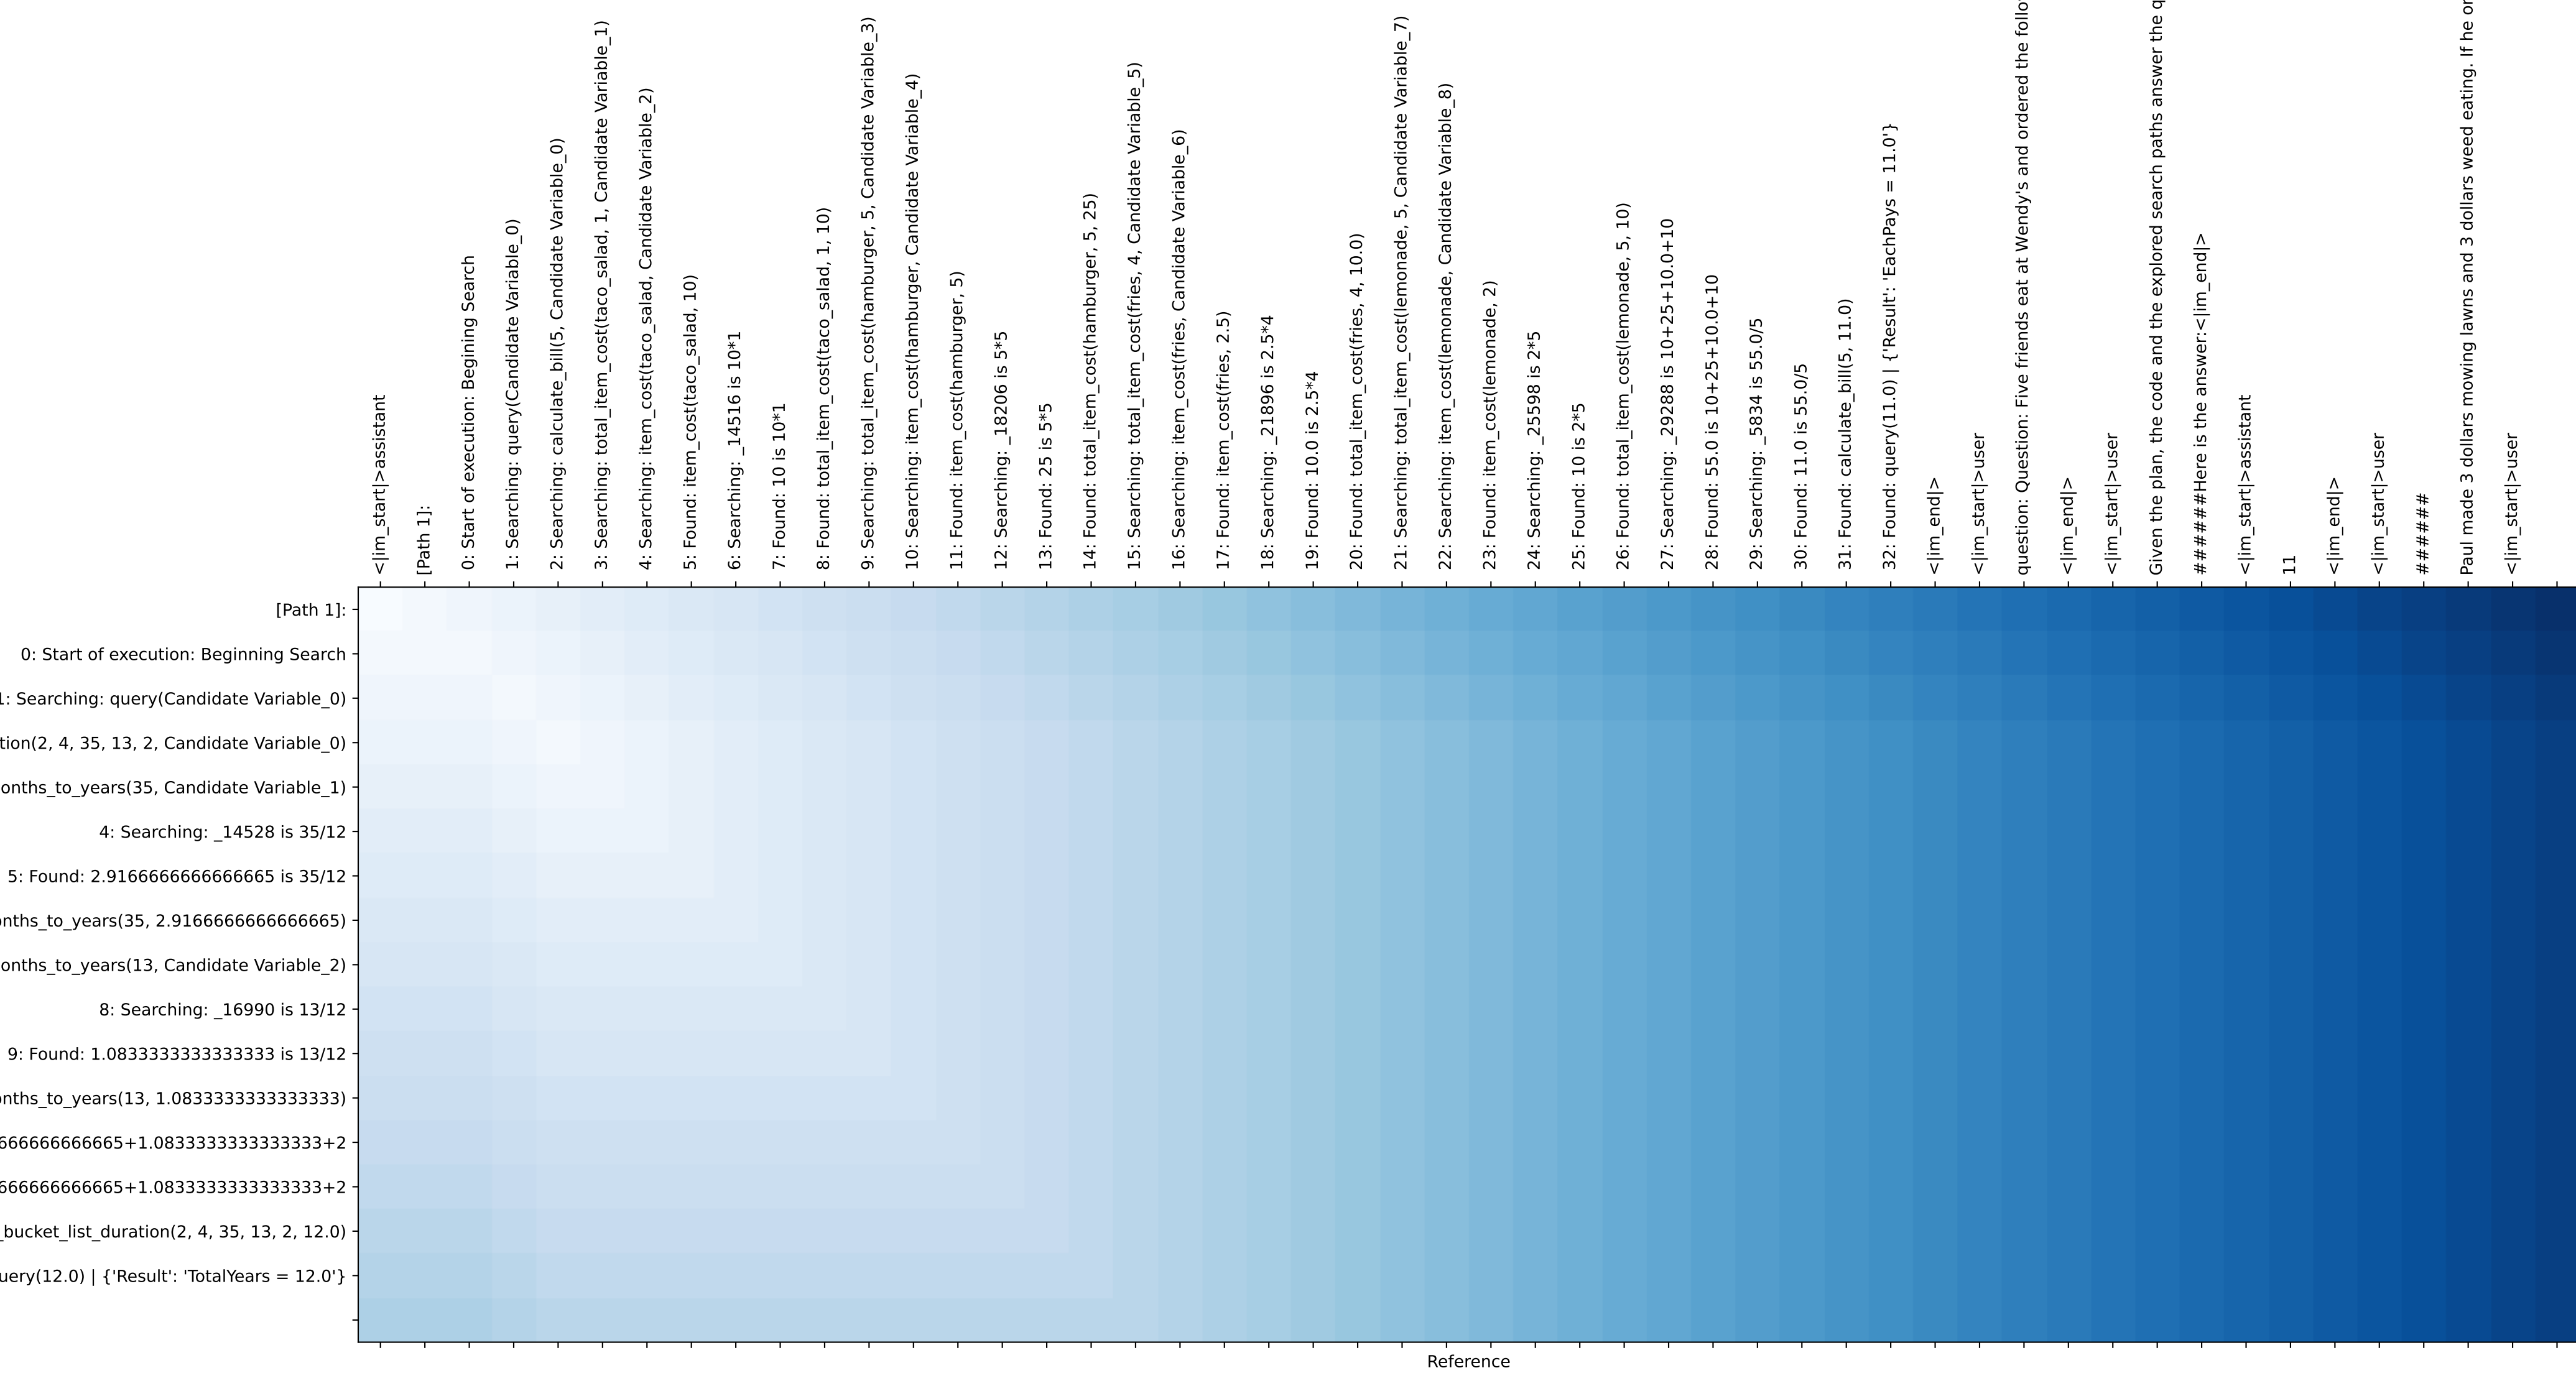

Supplement: supplementary_material [file attachment]

Hypothesis

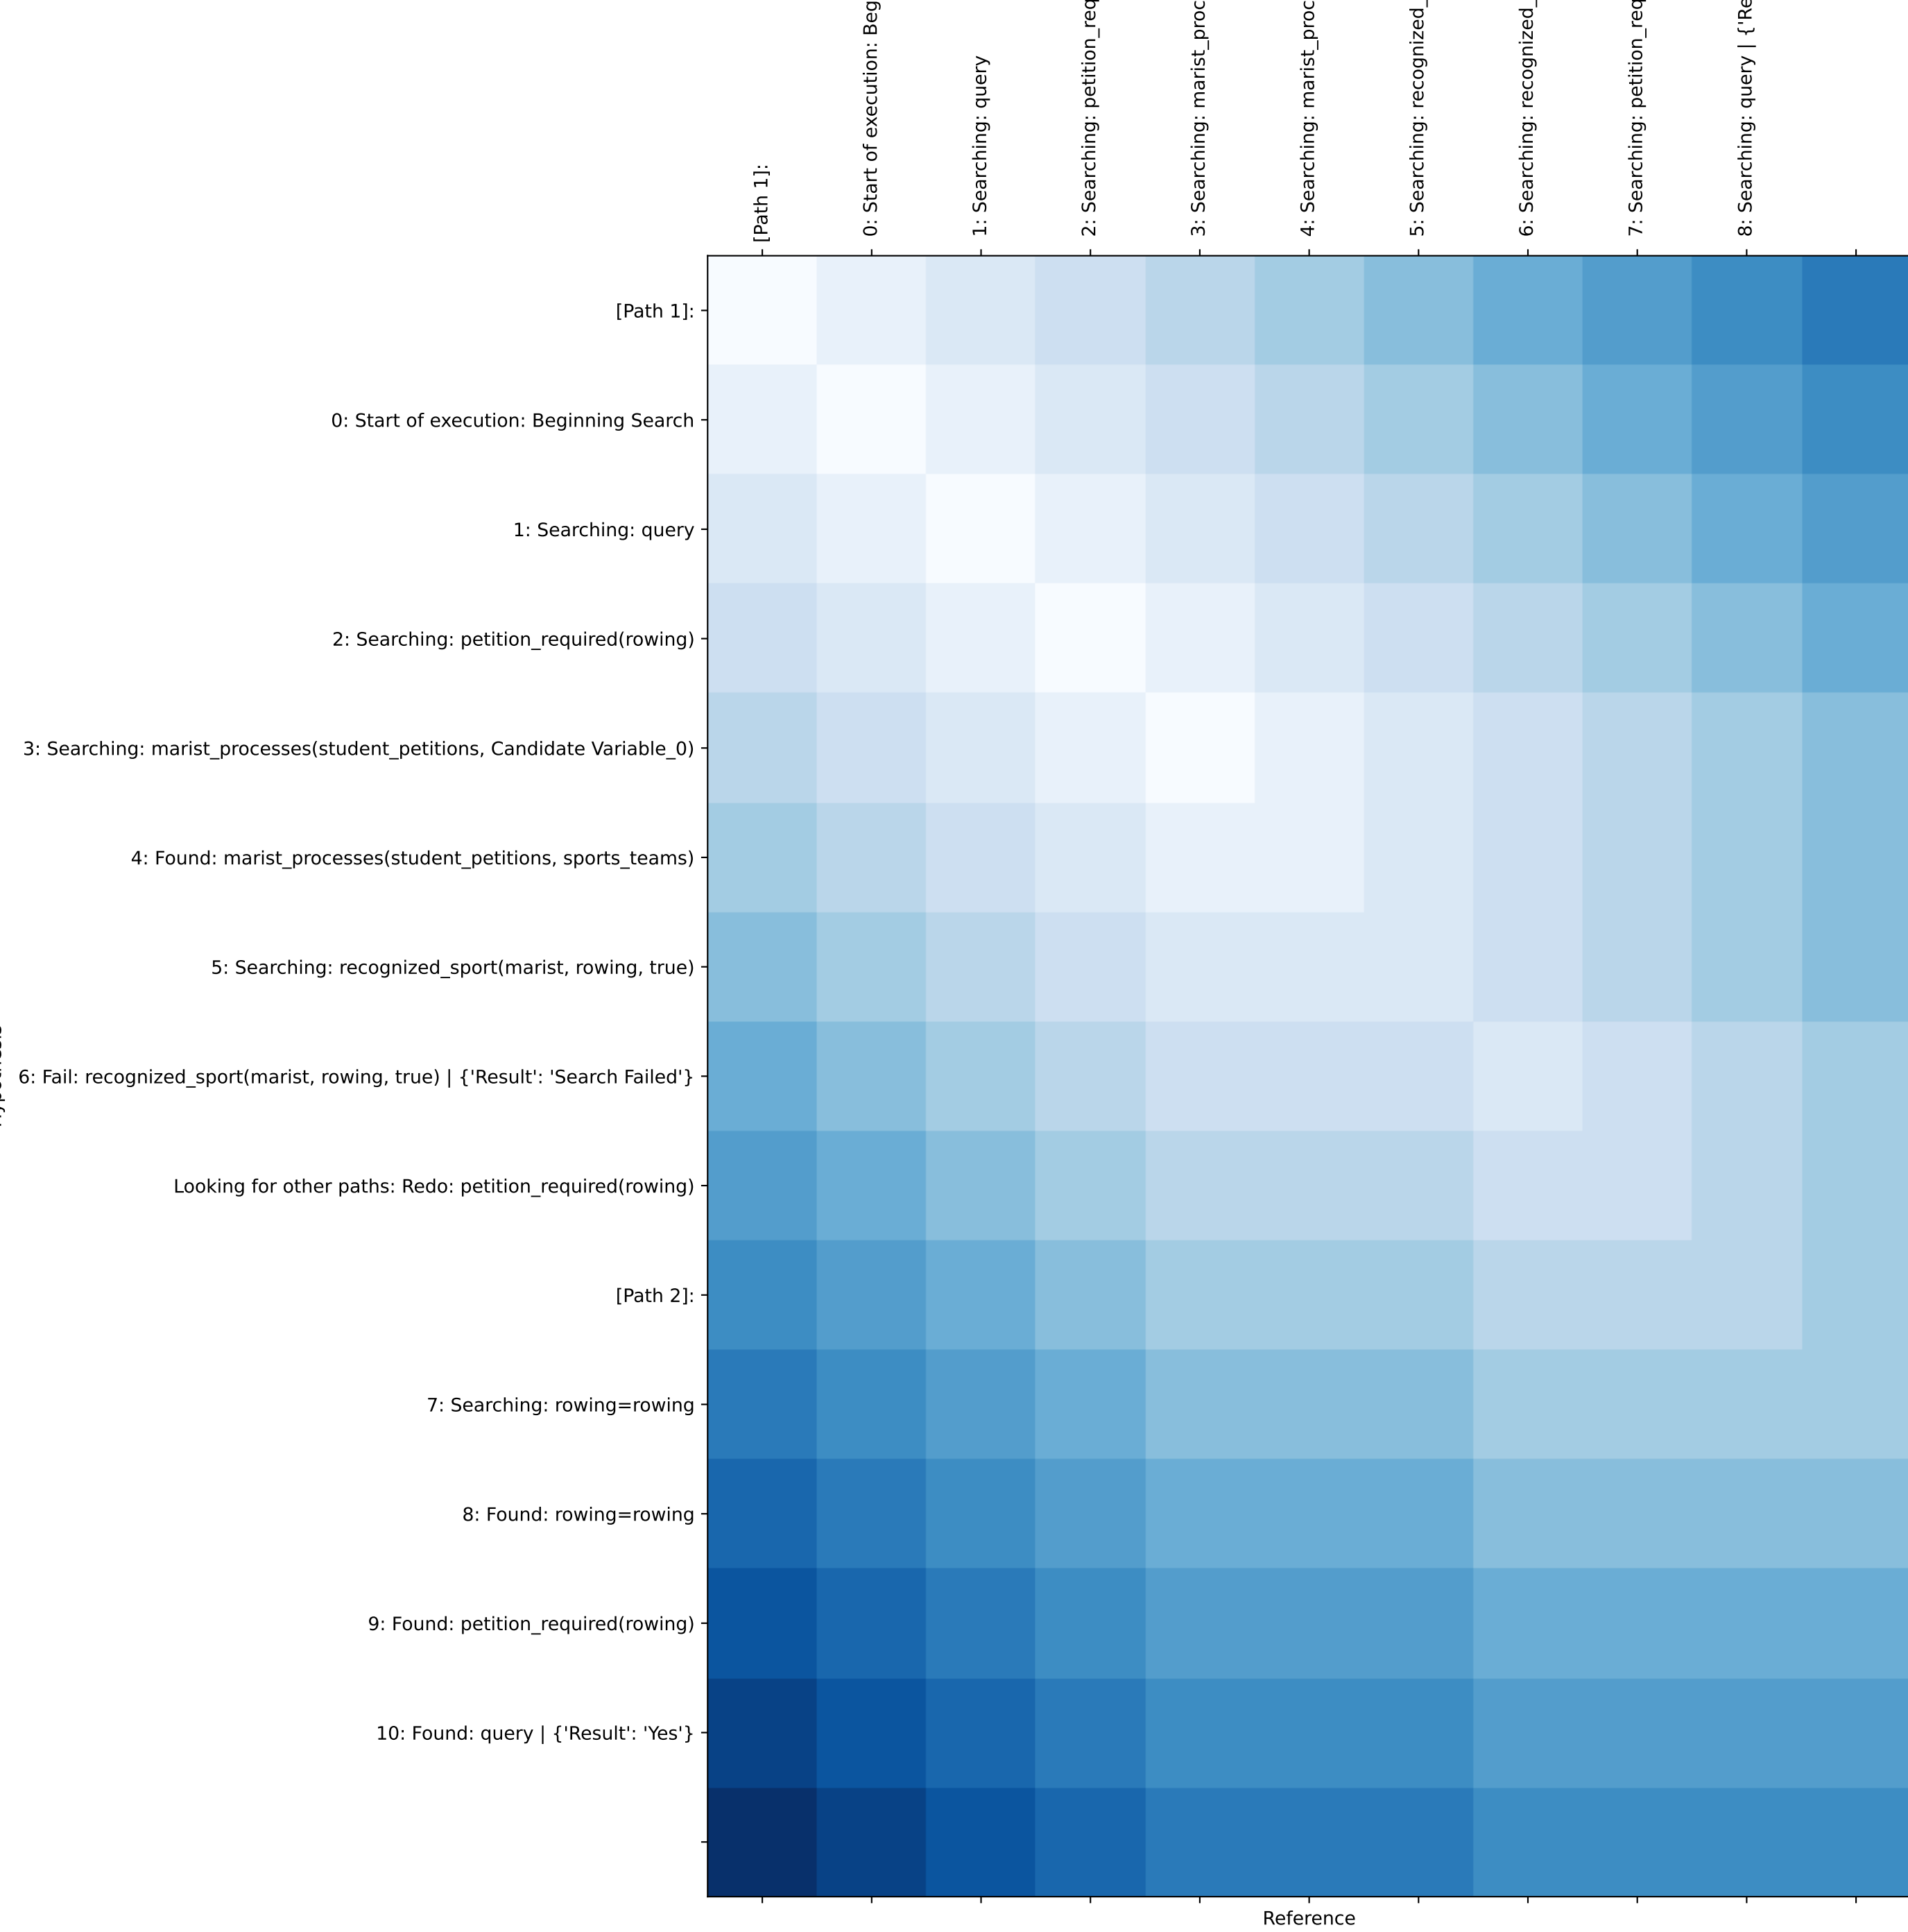

Reference

Supplement: supplementary_material [file attachment]

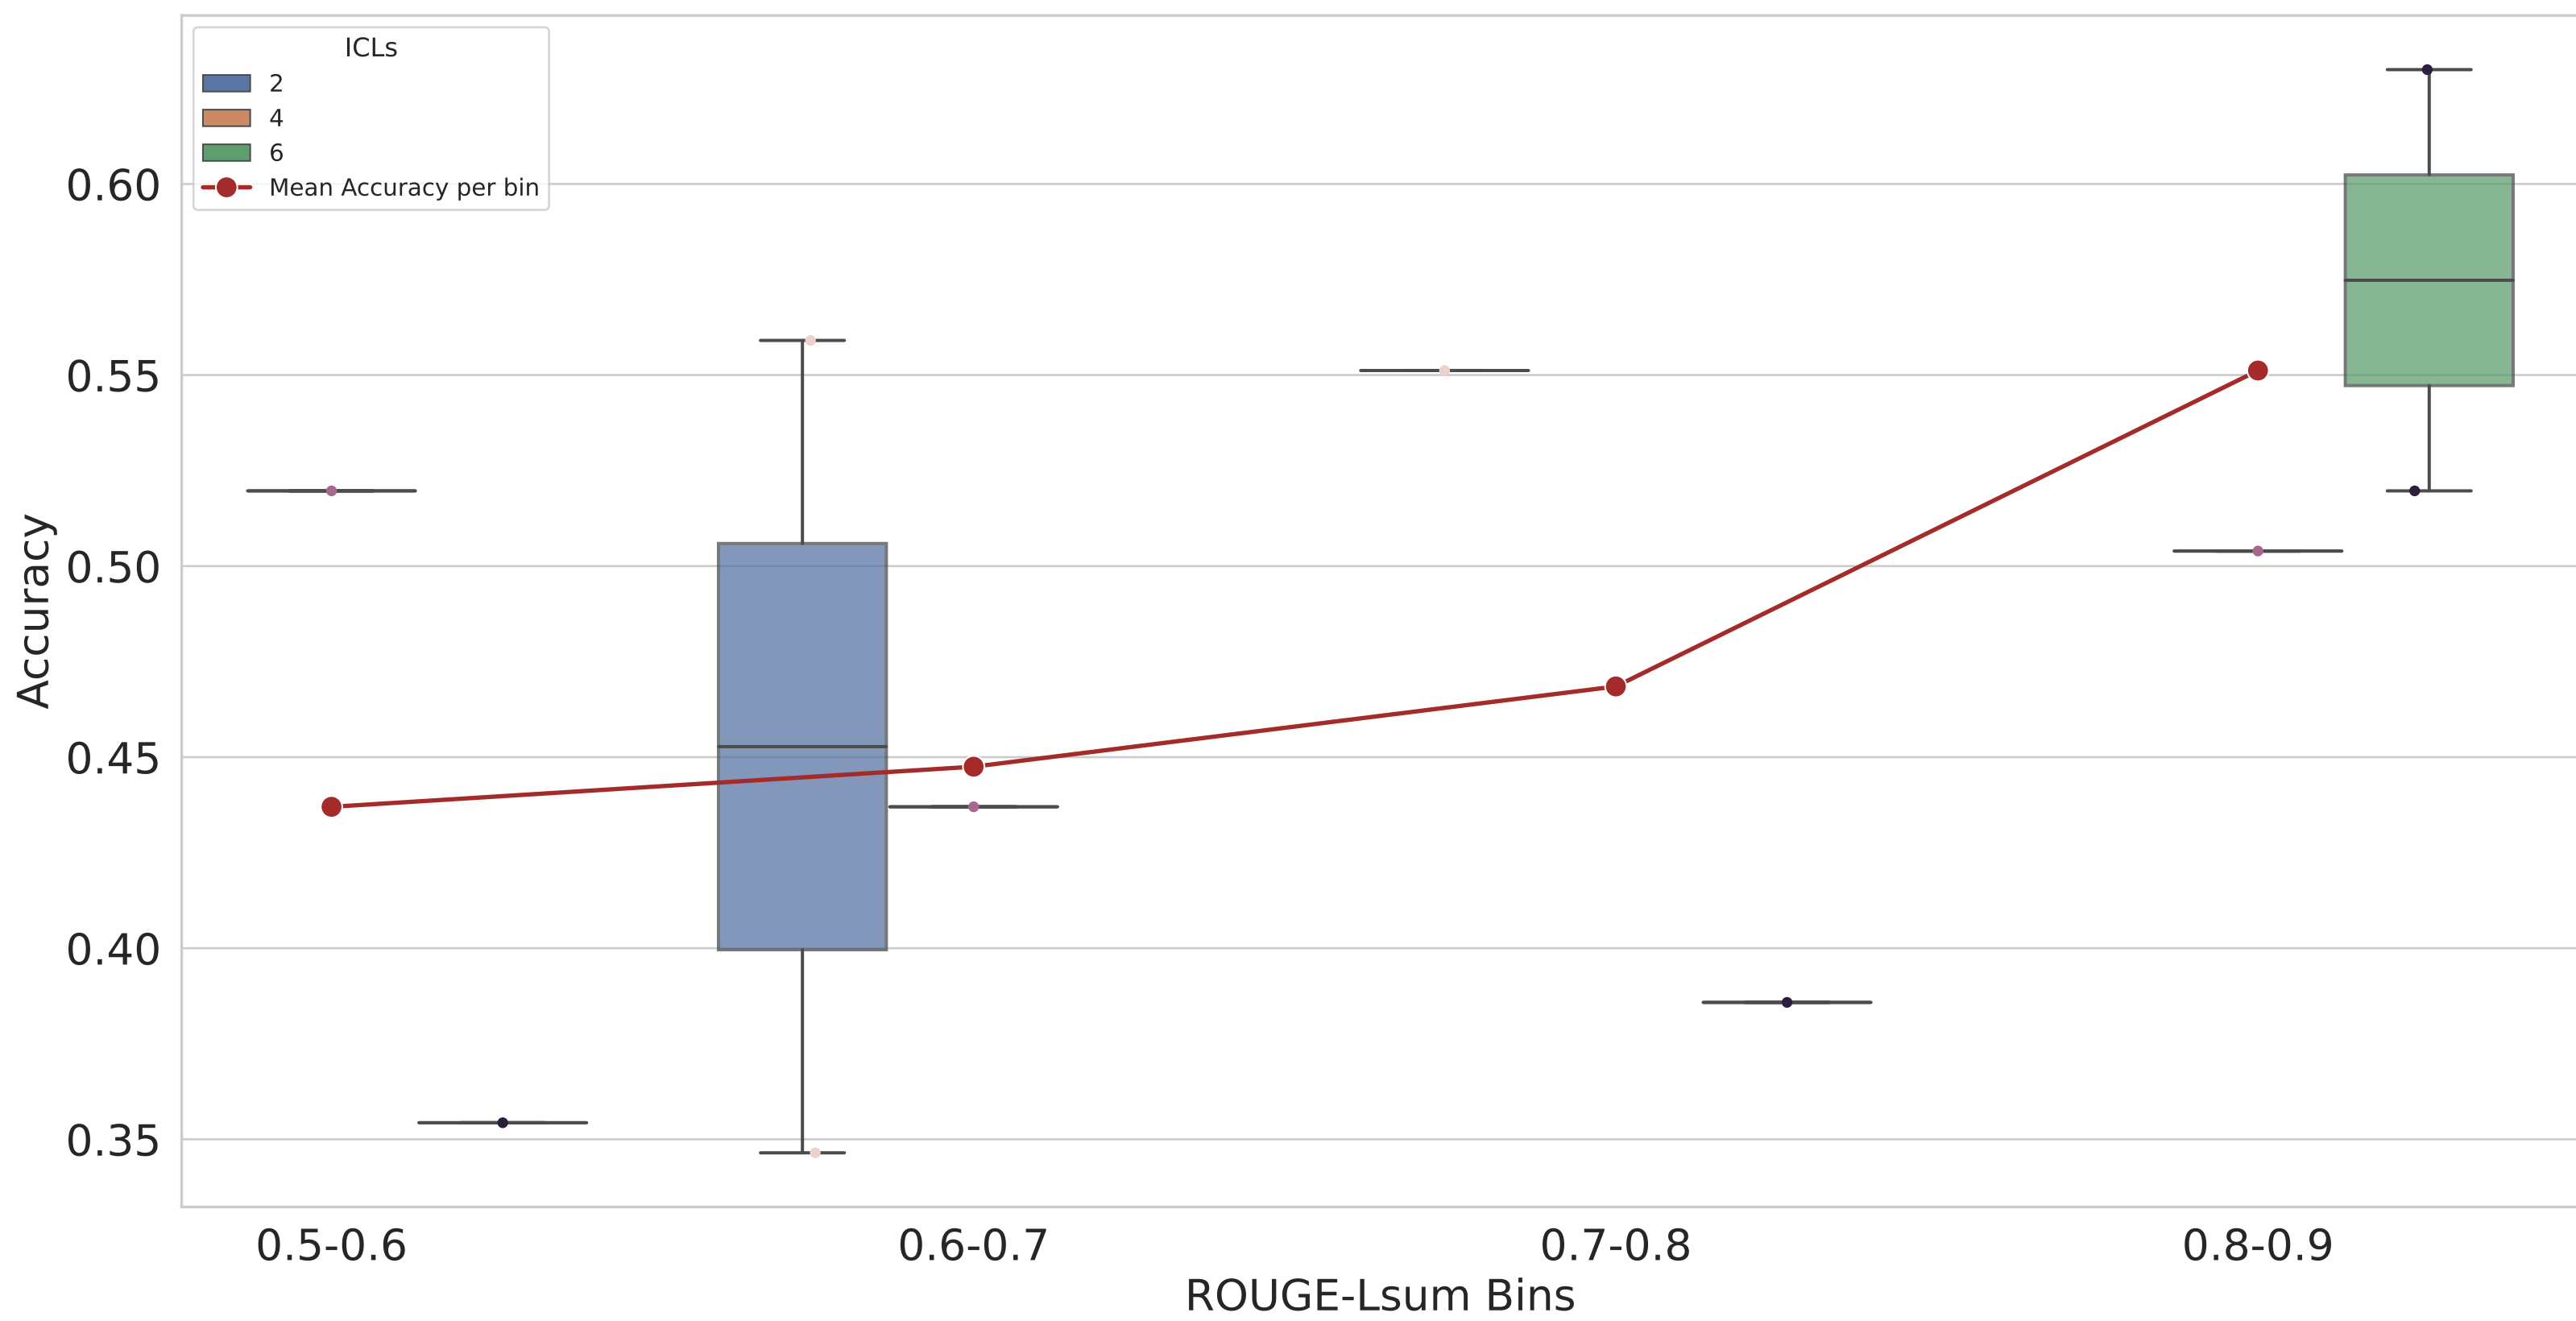

Supplement: supplementary_material [file attachment]

Hypothesis

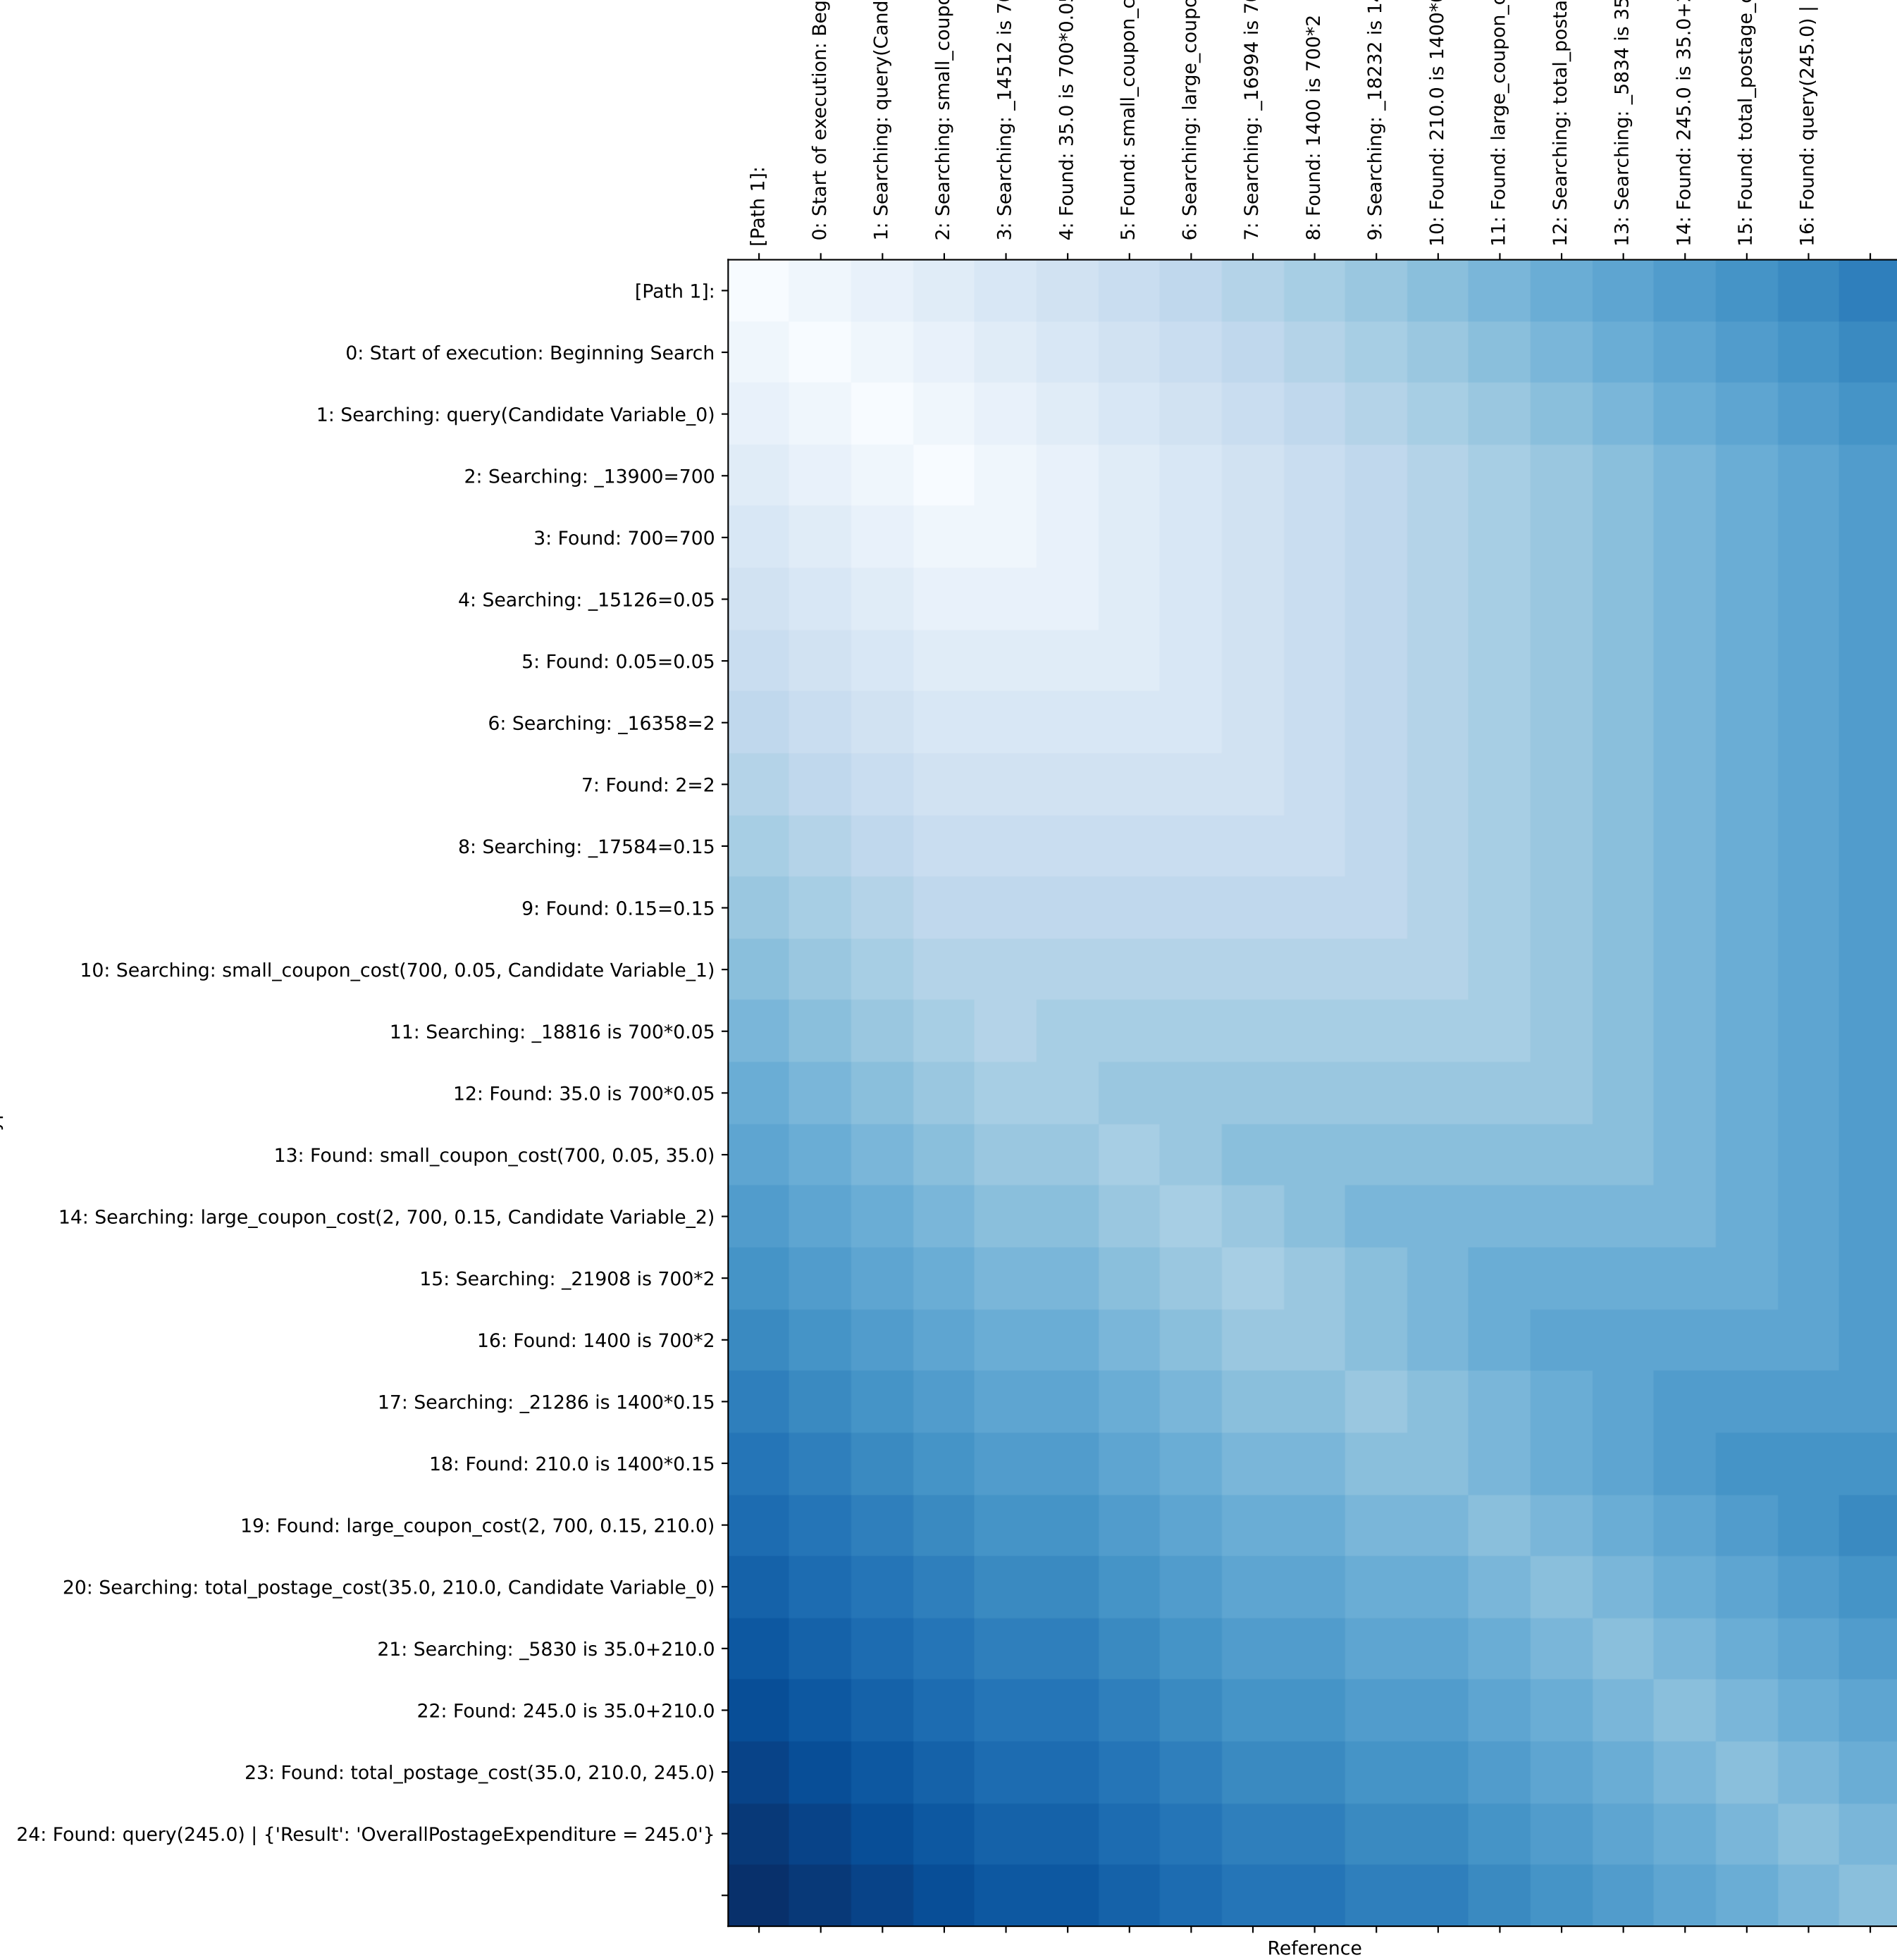

Supplement: supplementary_material [file attachment]

Hypothesis

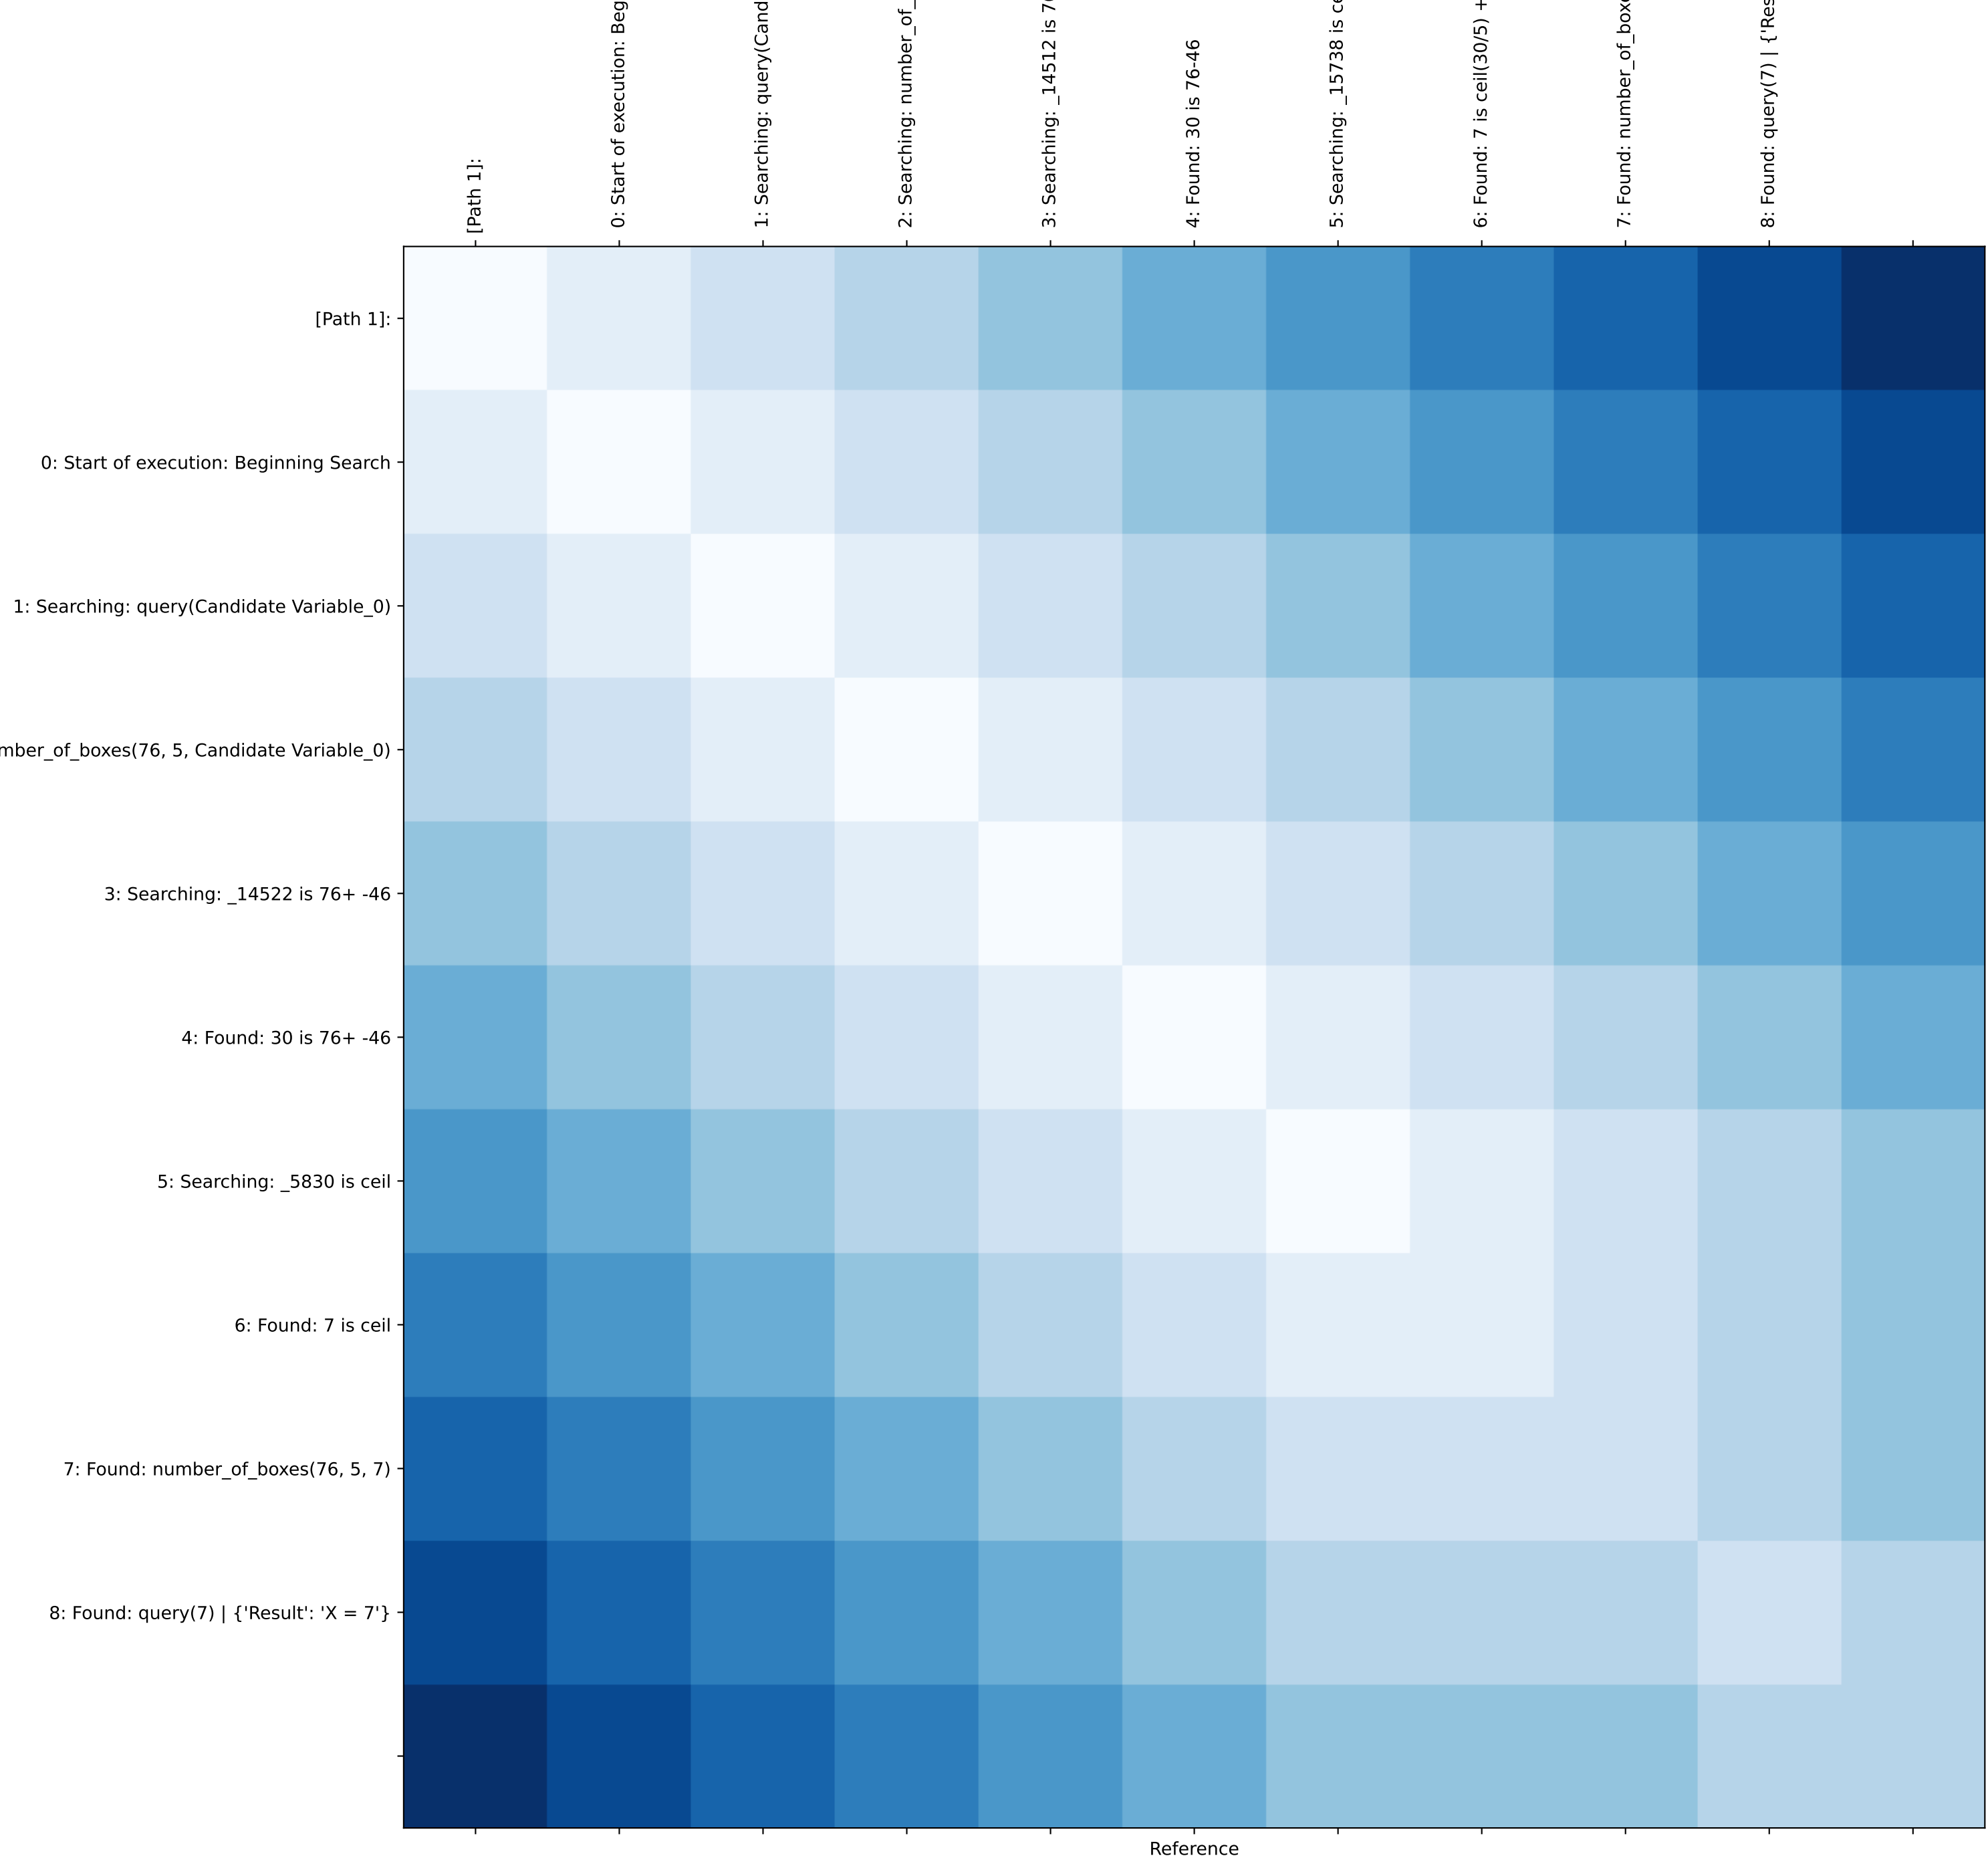

Reference

Supplement: supplementary_material [file attachment]

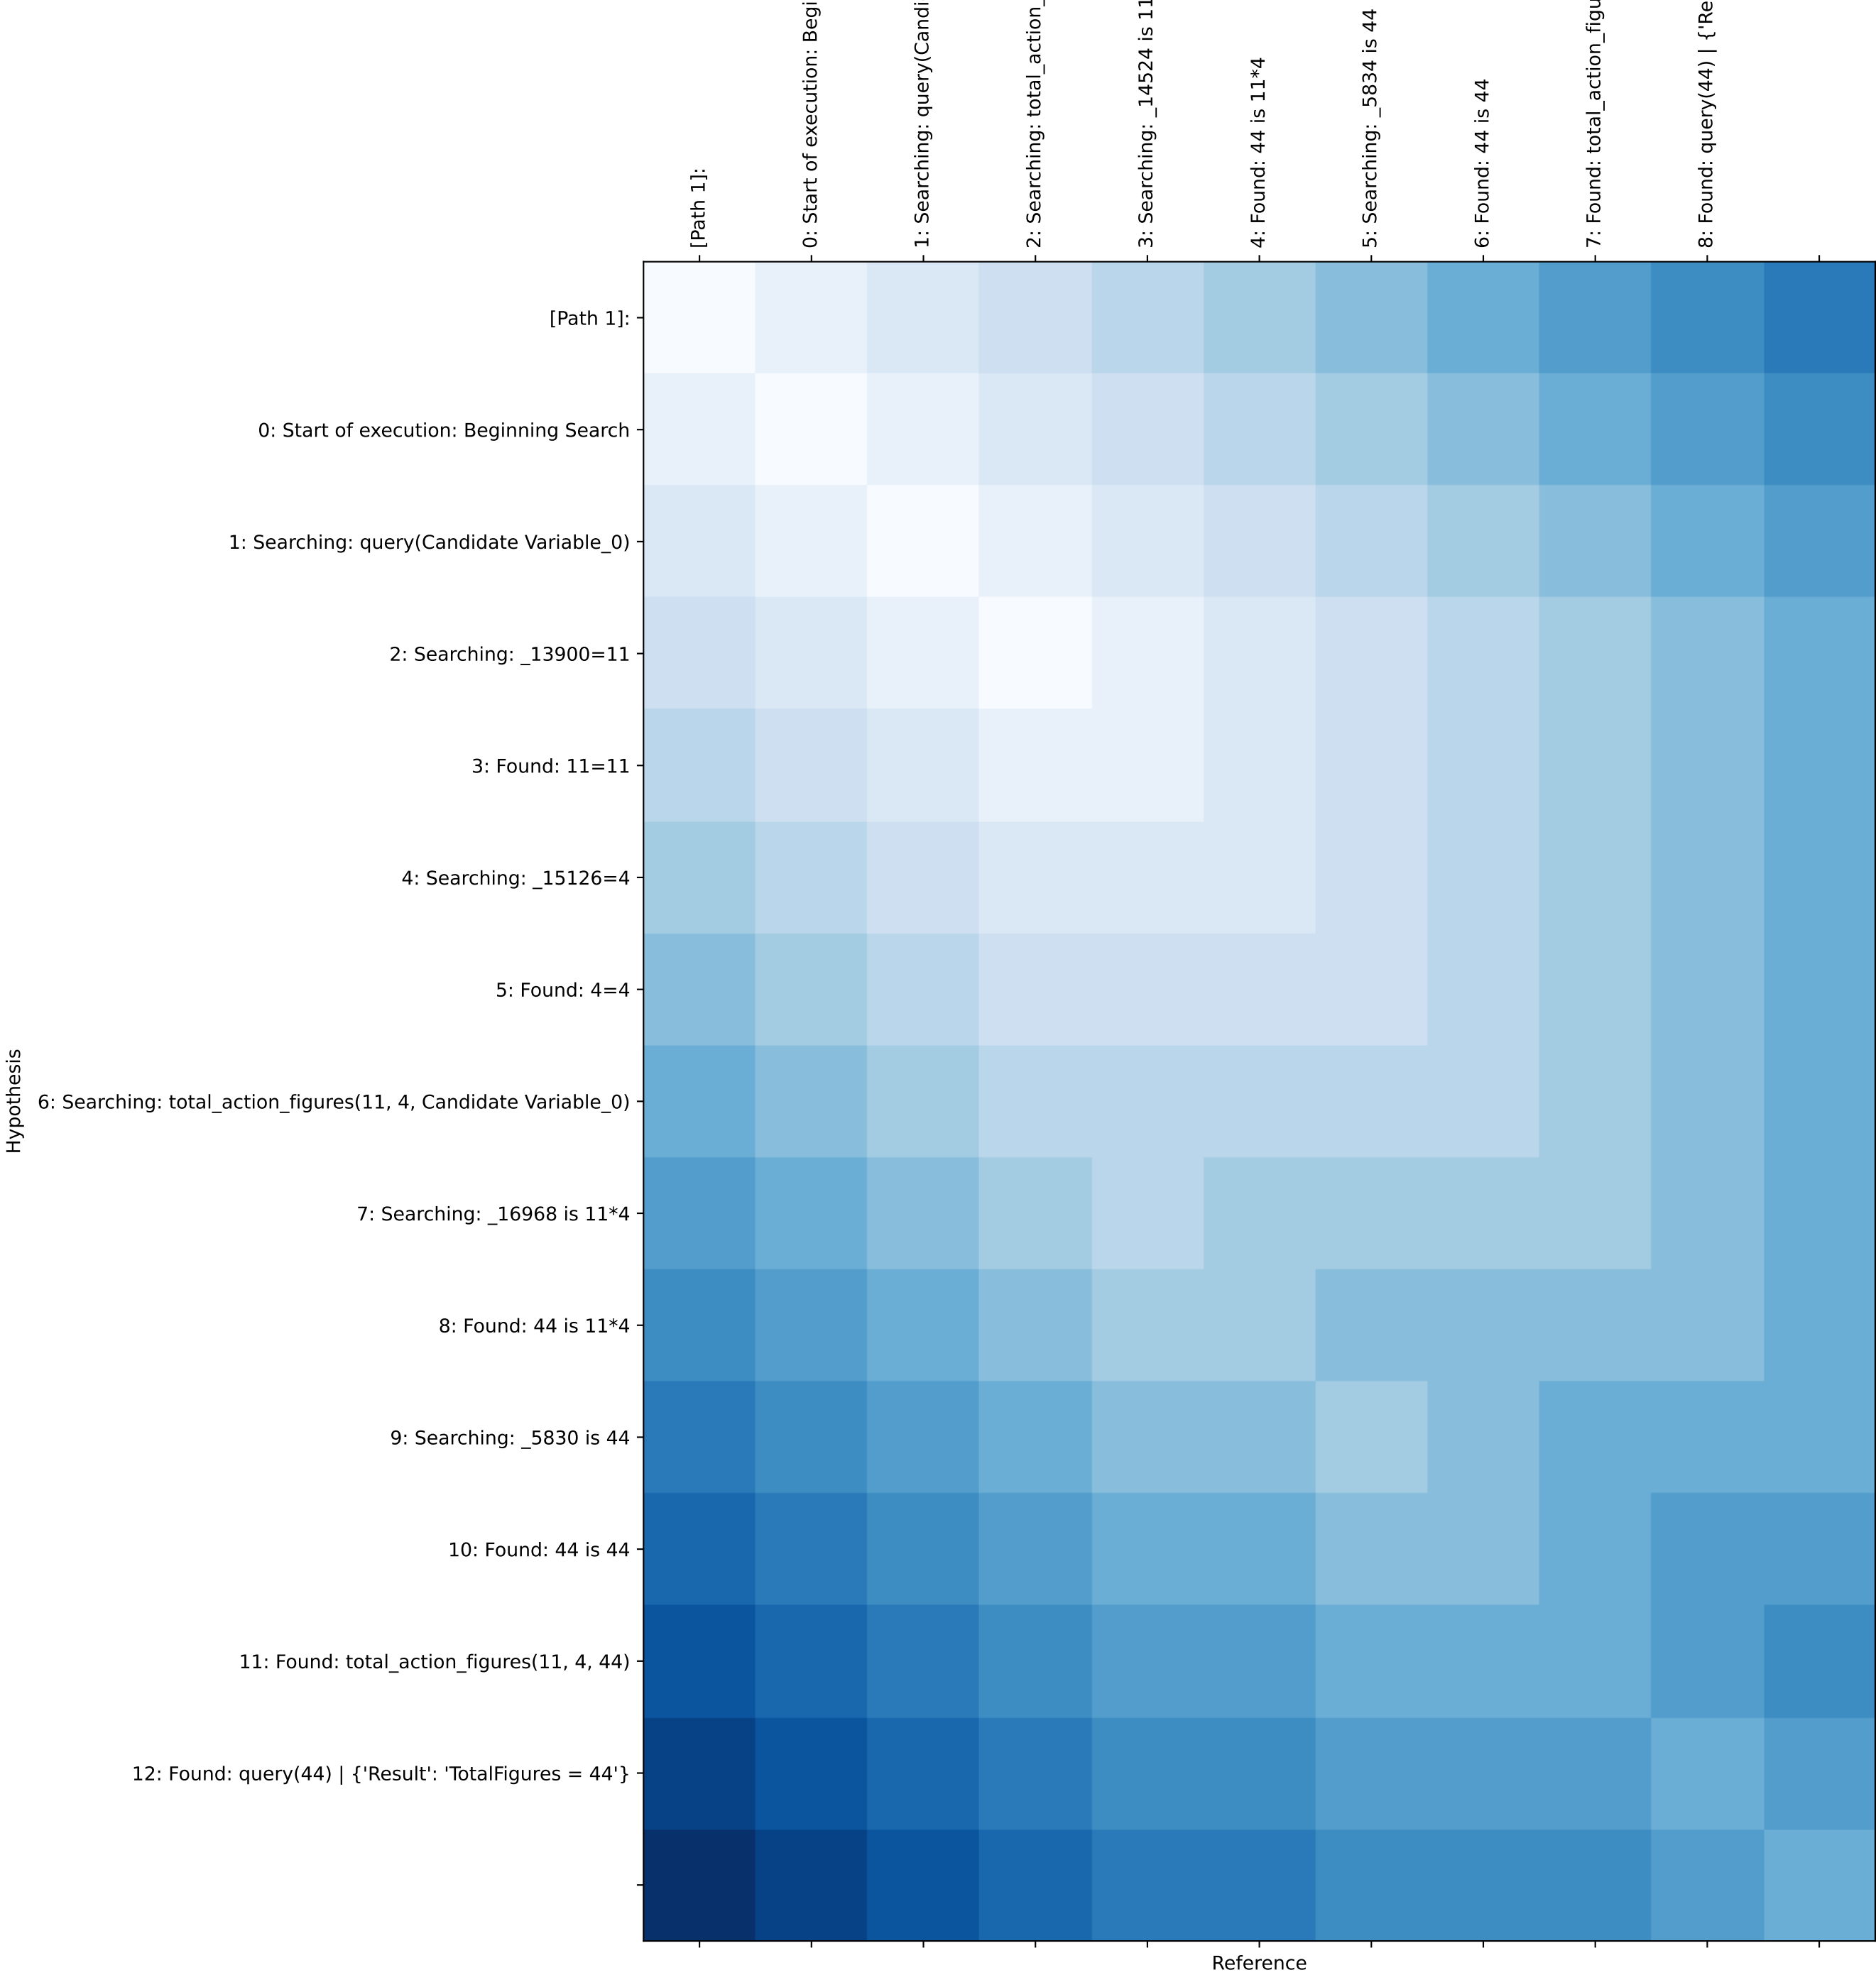

Supplement: supplementary_material [file attachment]

Hypothesis

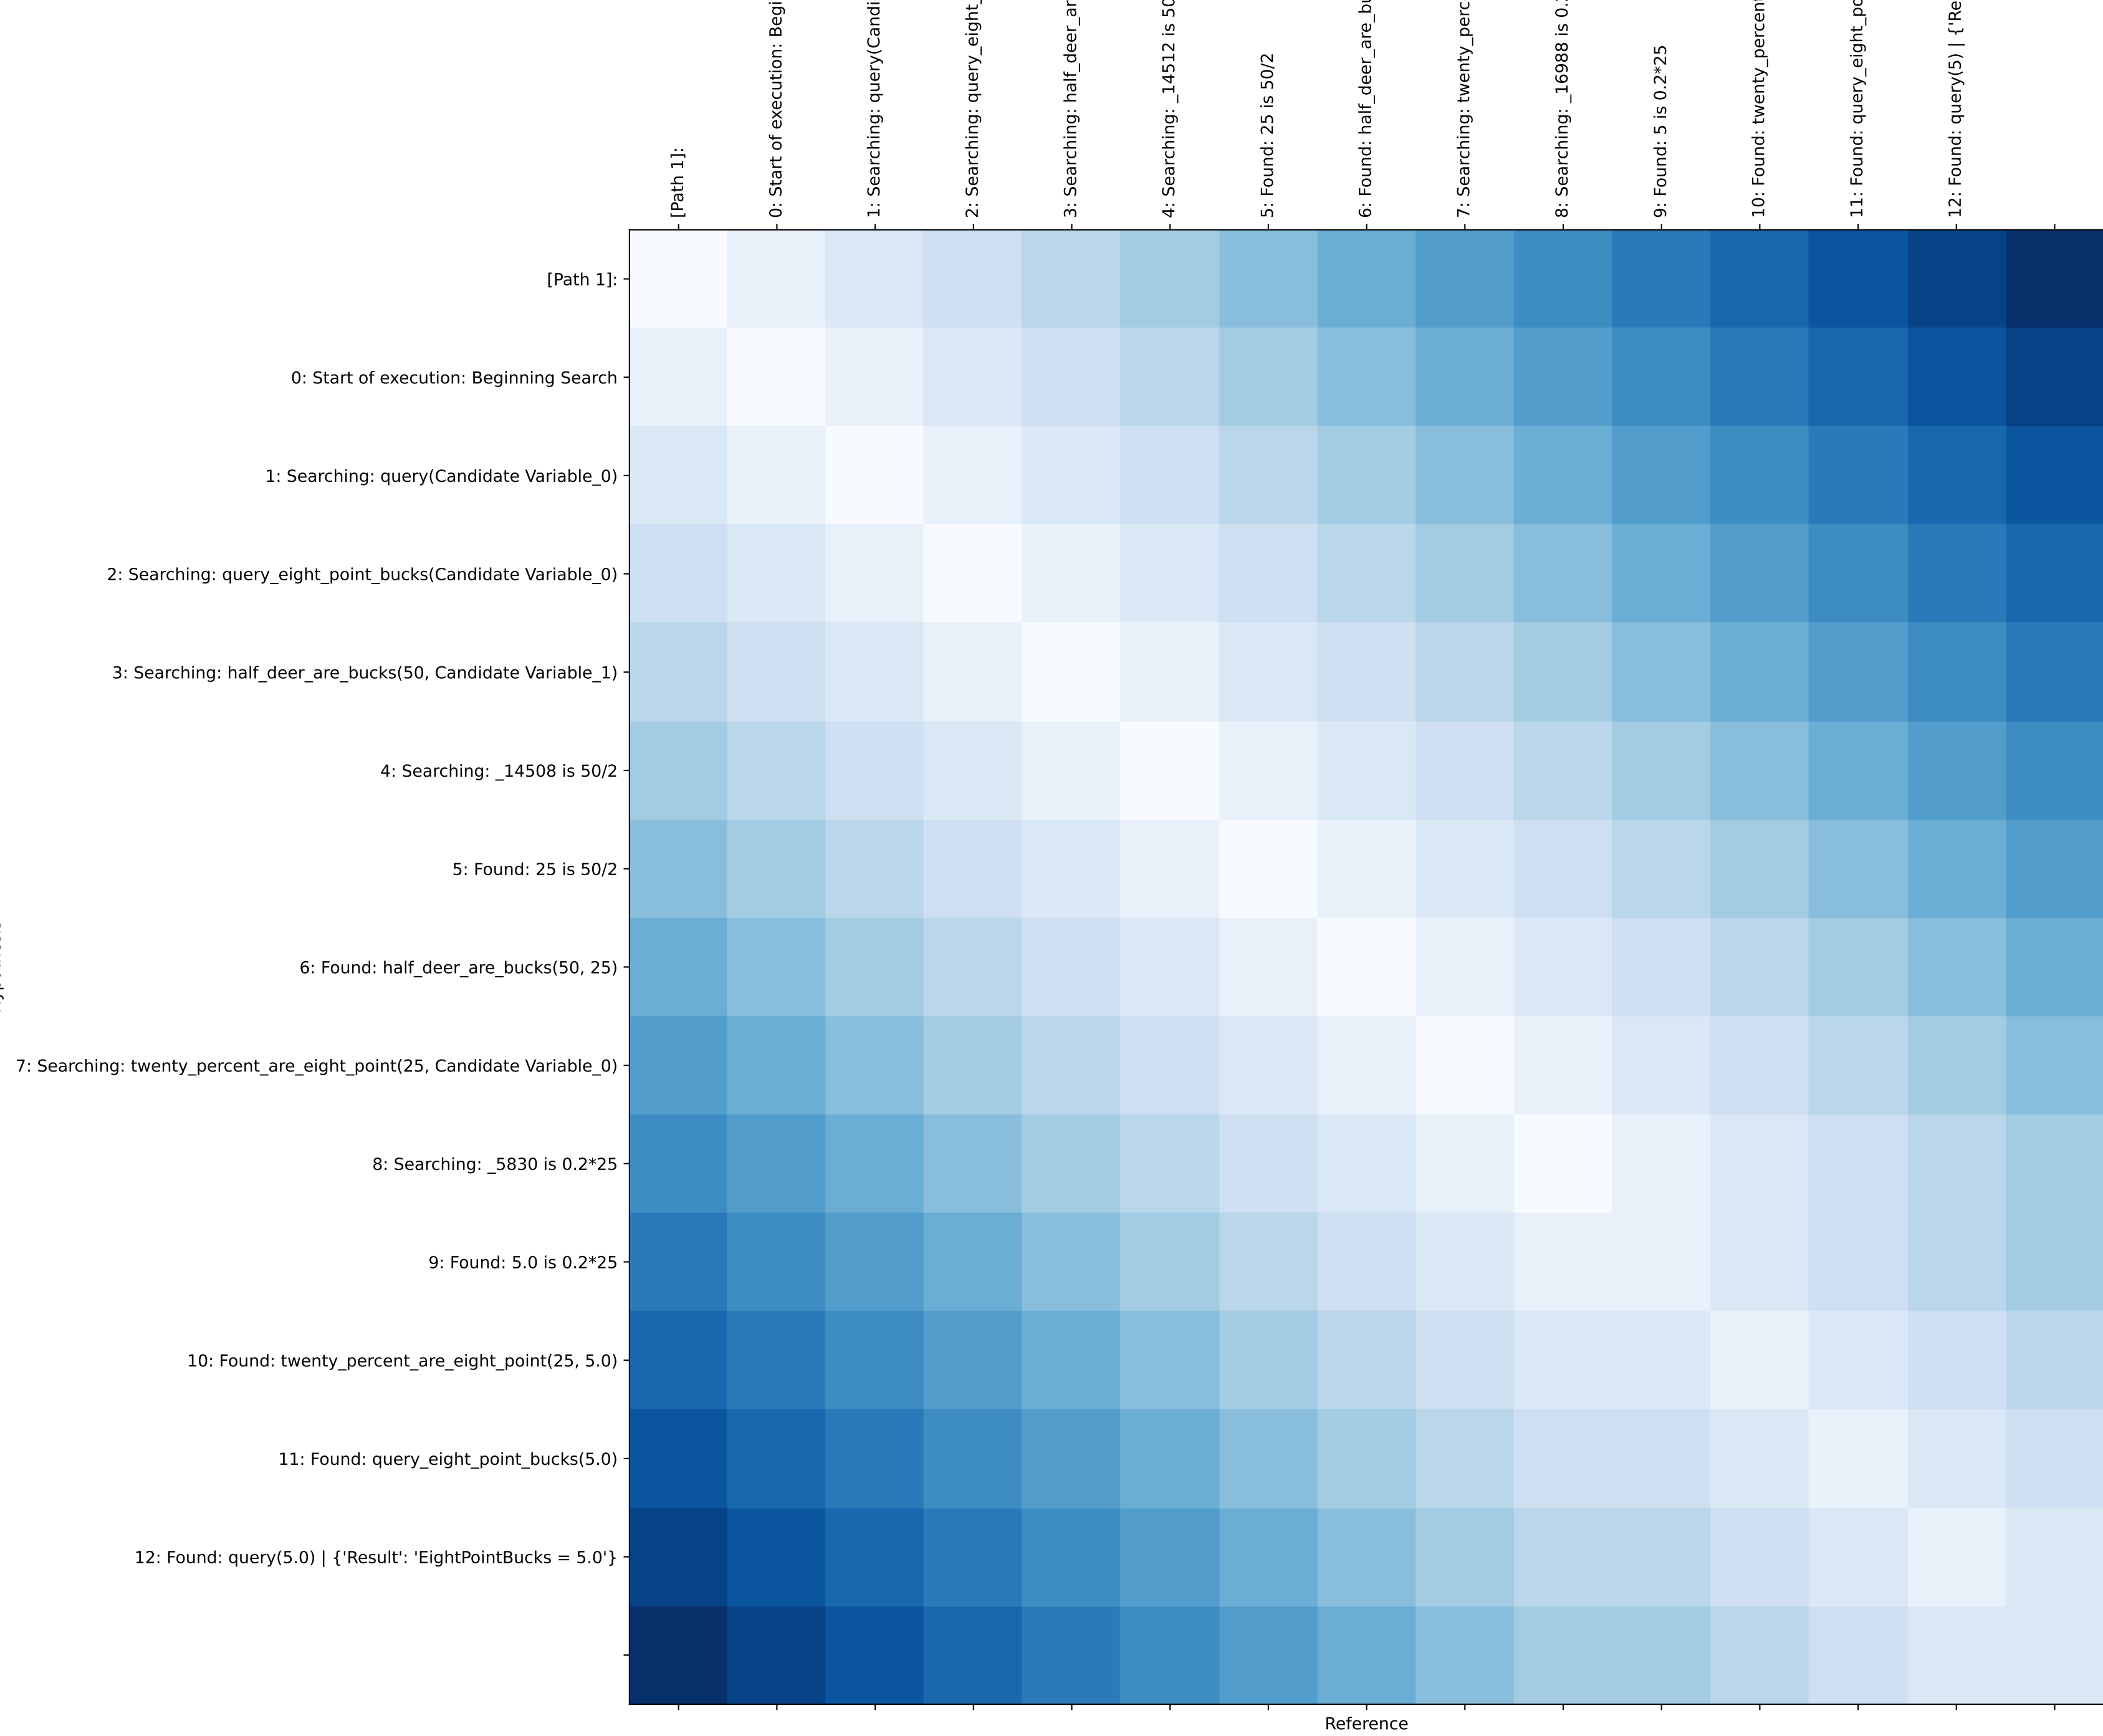

Supplement: supplementary_material [file attachment]

Hypothesis

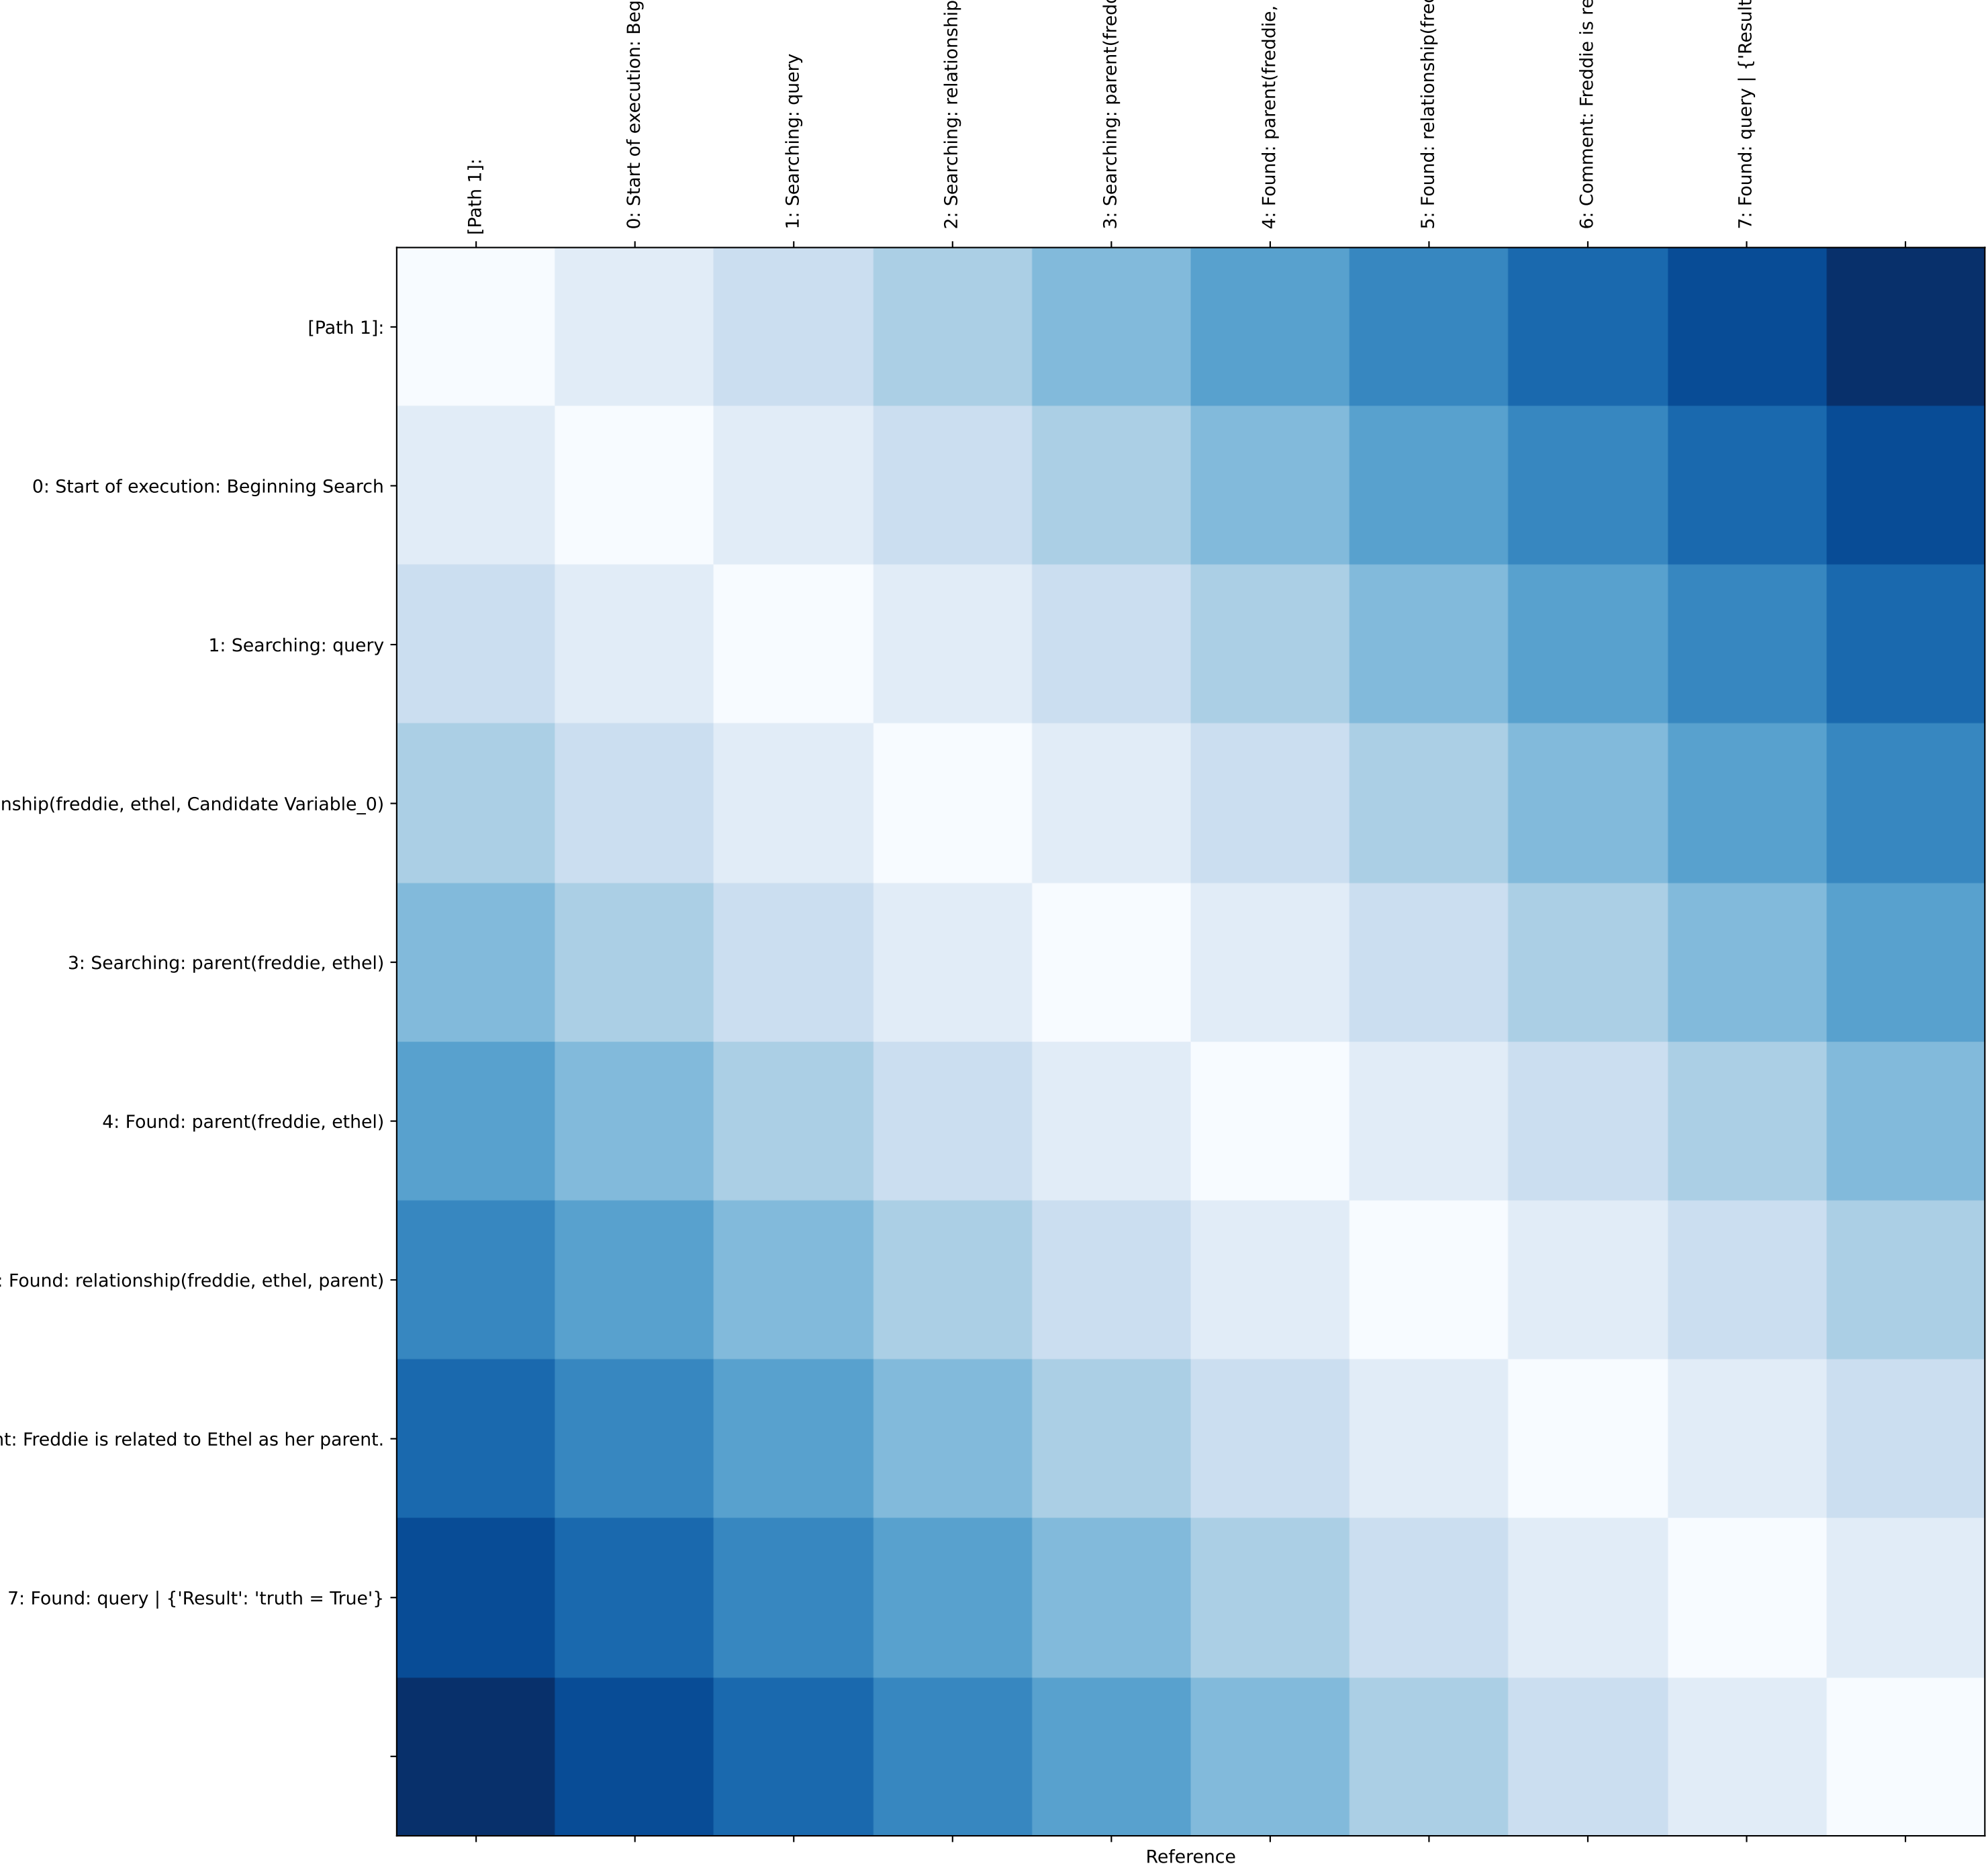

Reference

Supplement: supplementary_material [file attachment]

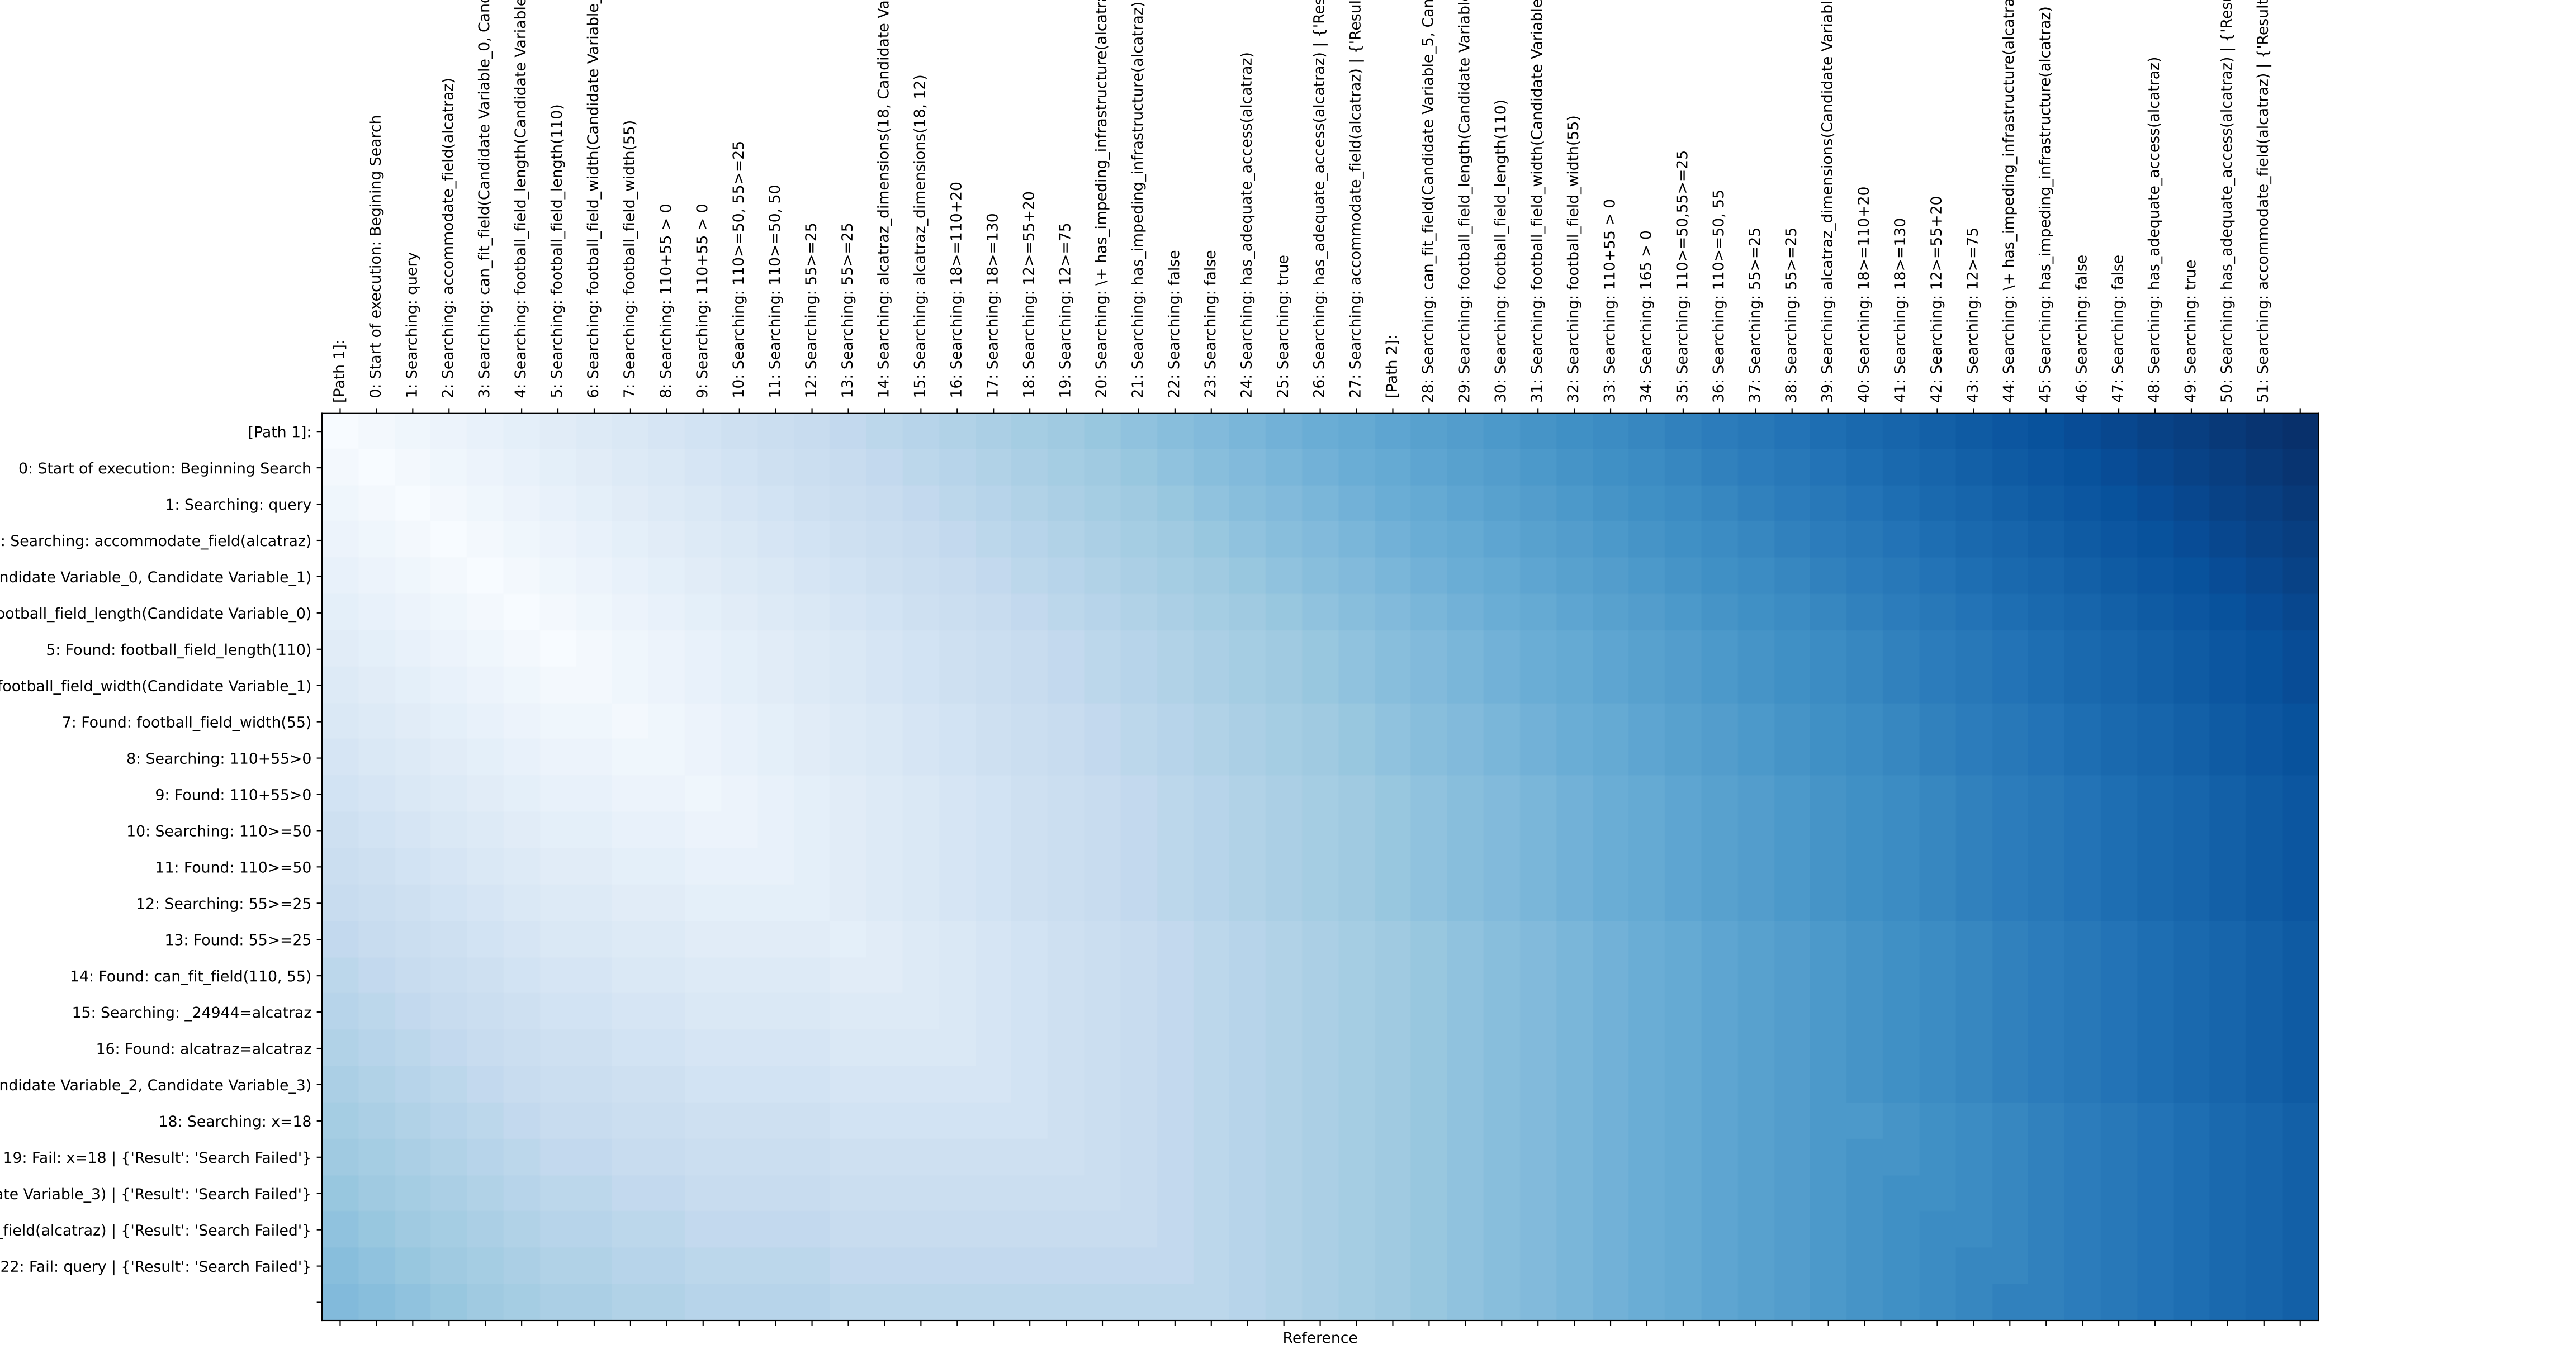

Supplement: supplementary_material [file attachment]

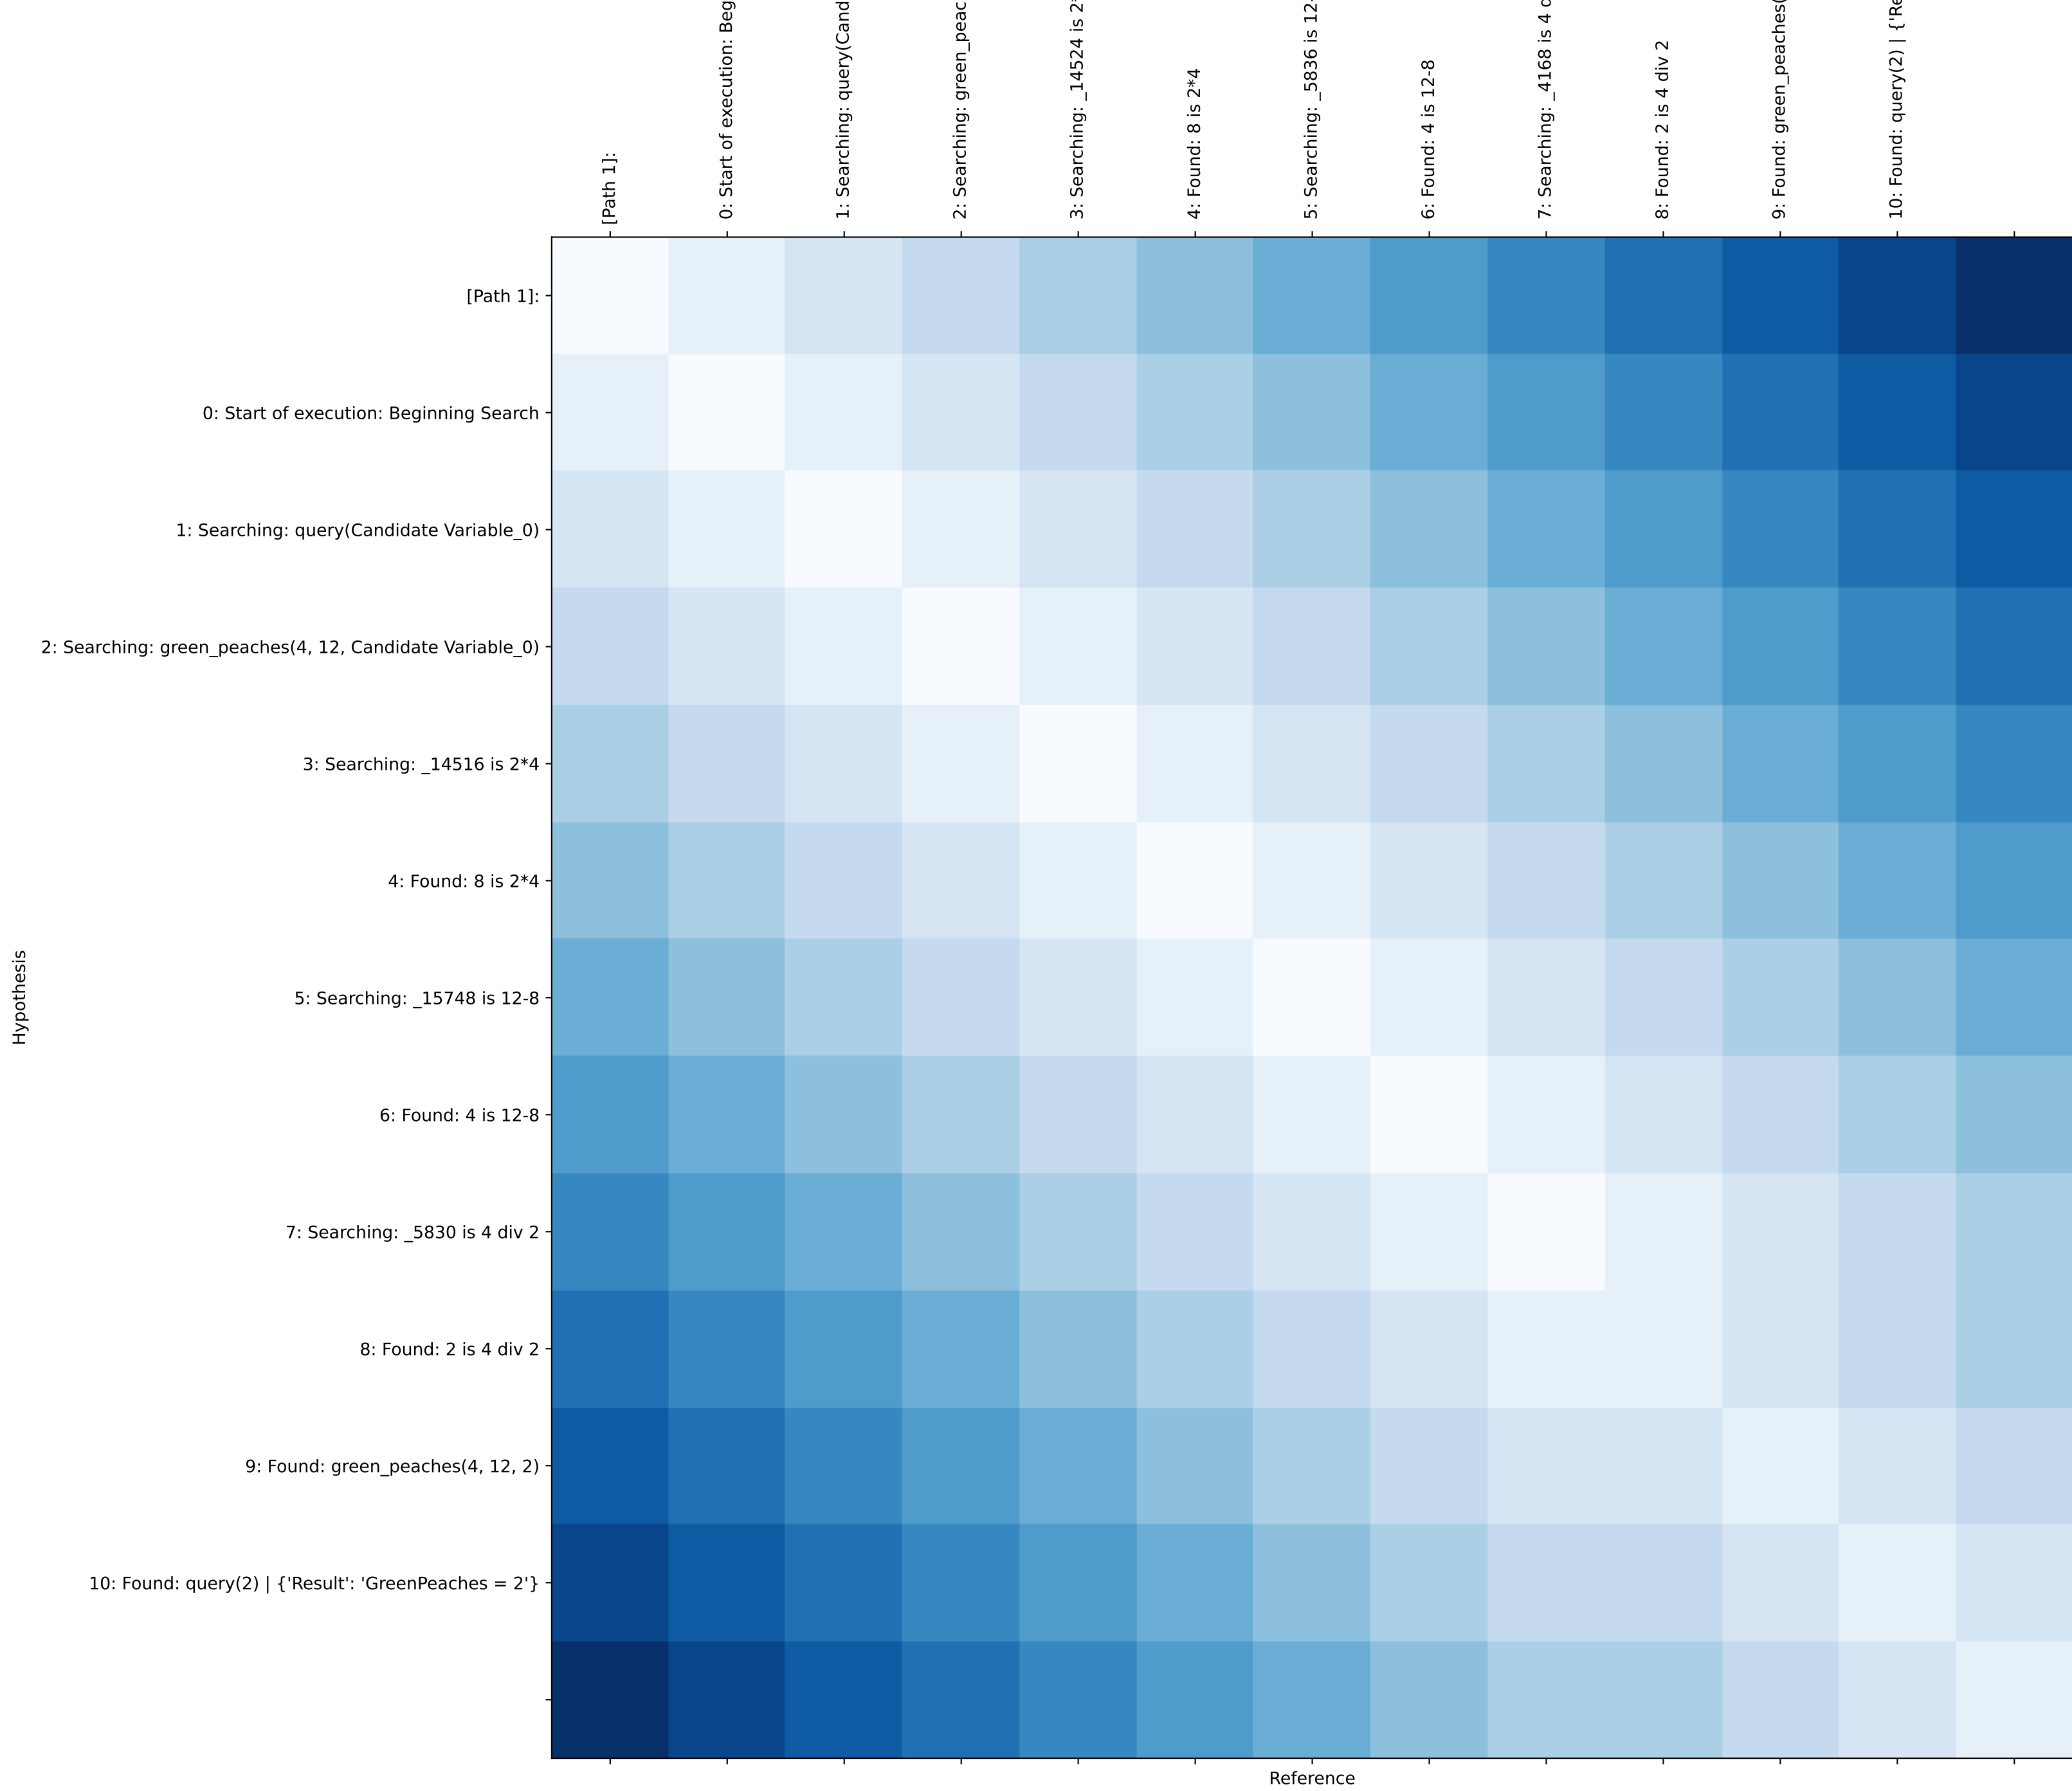

Supplement: supplementary_material [file attachment]

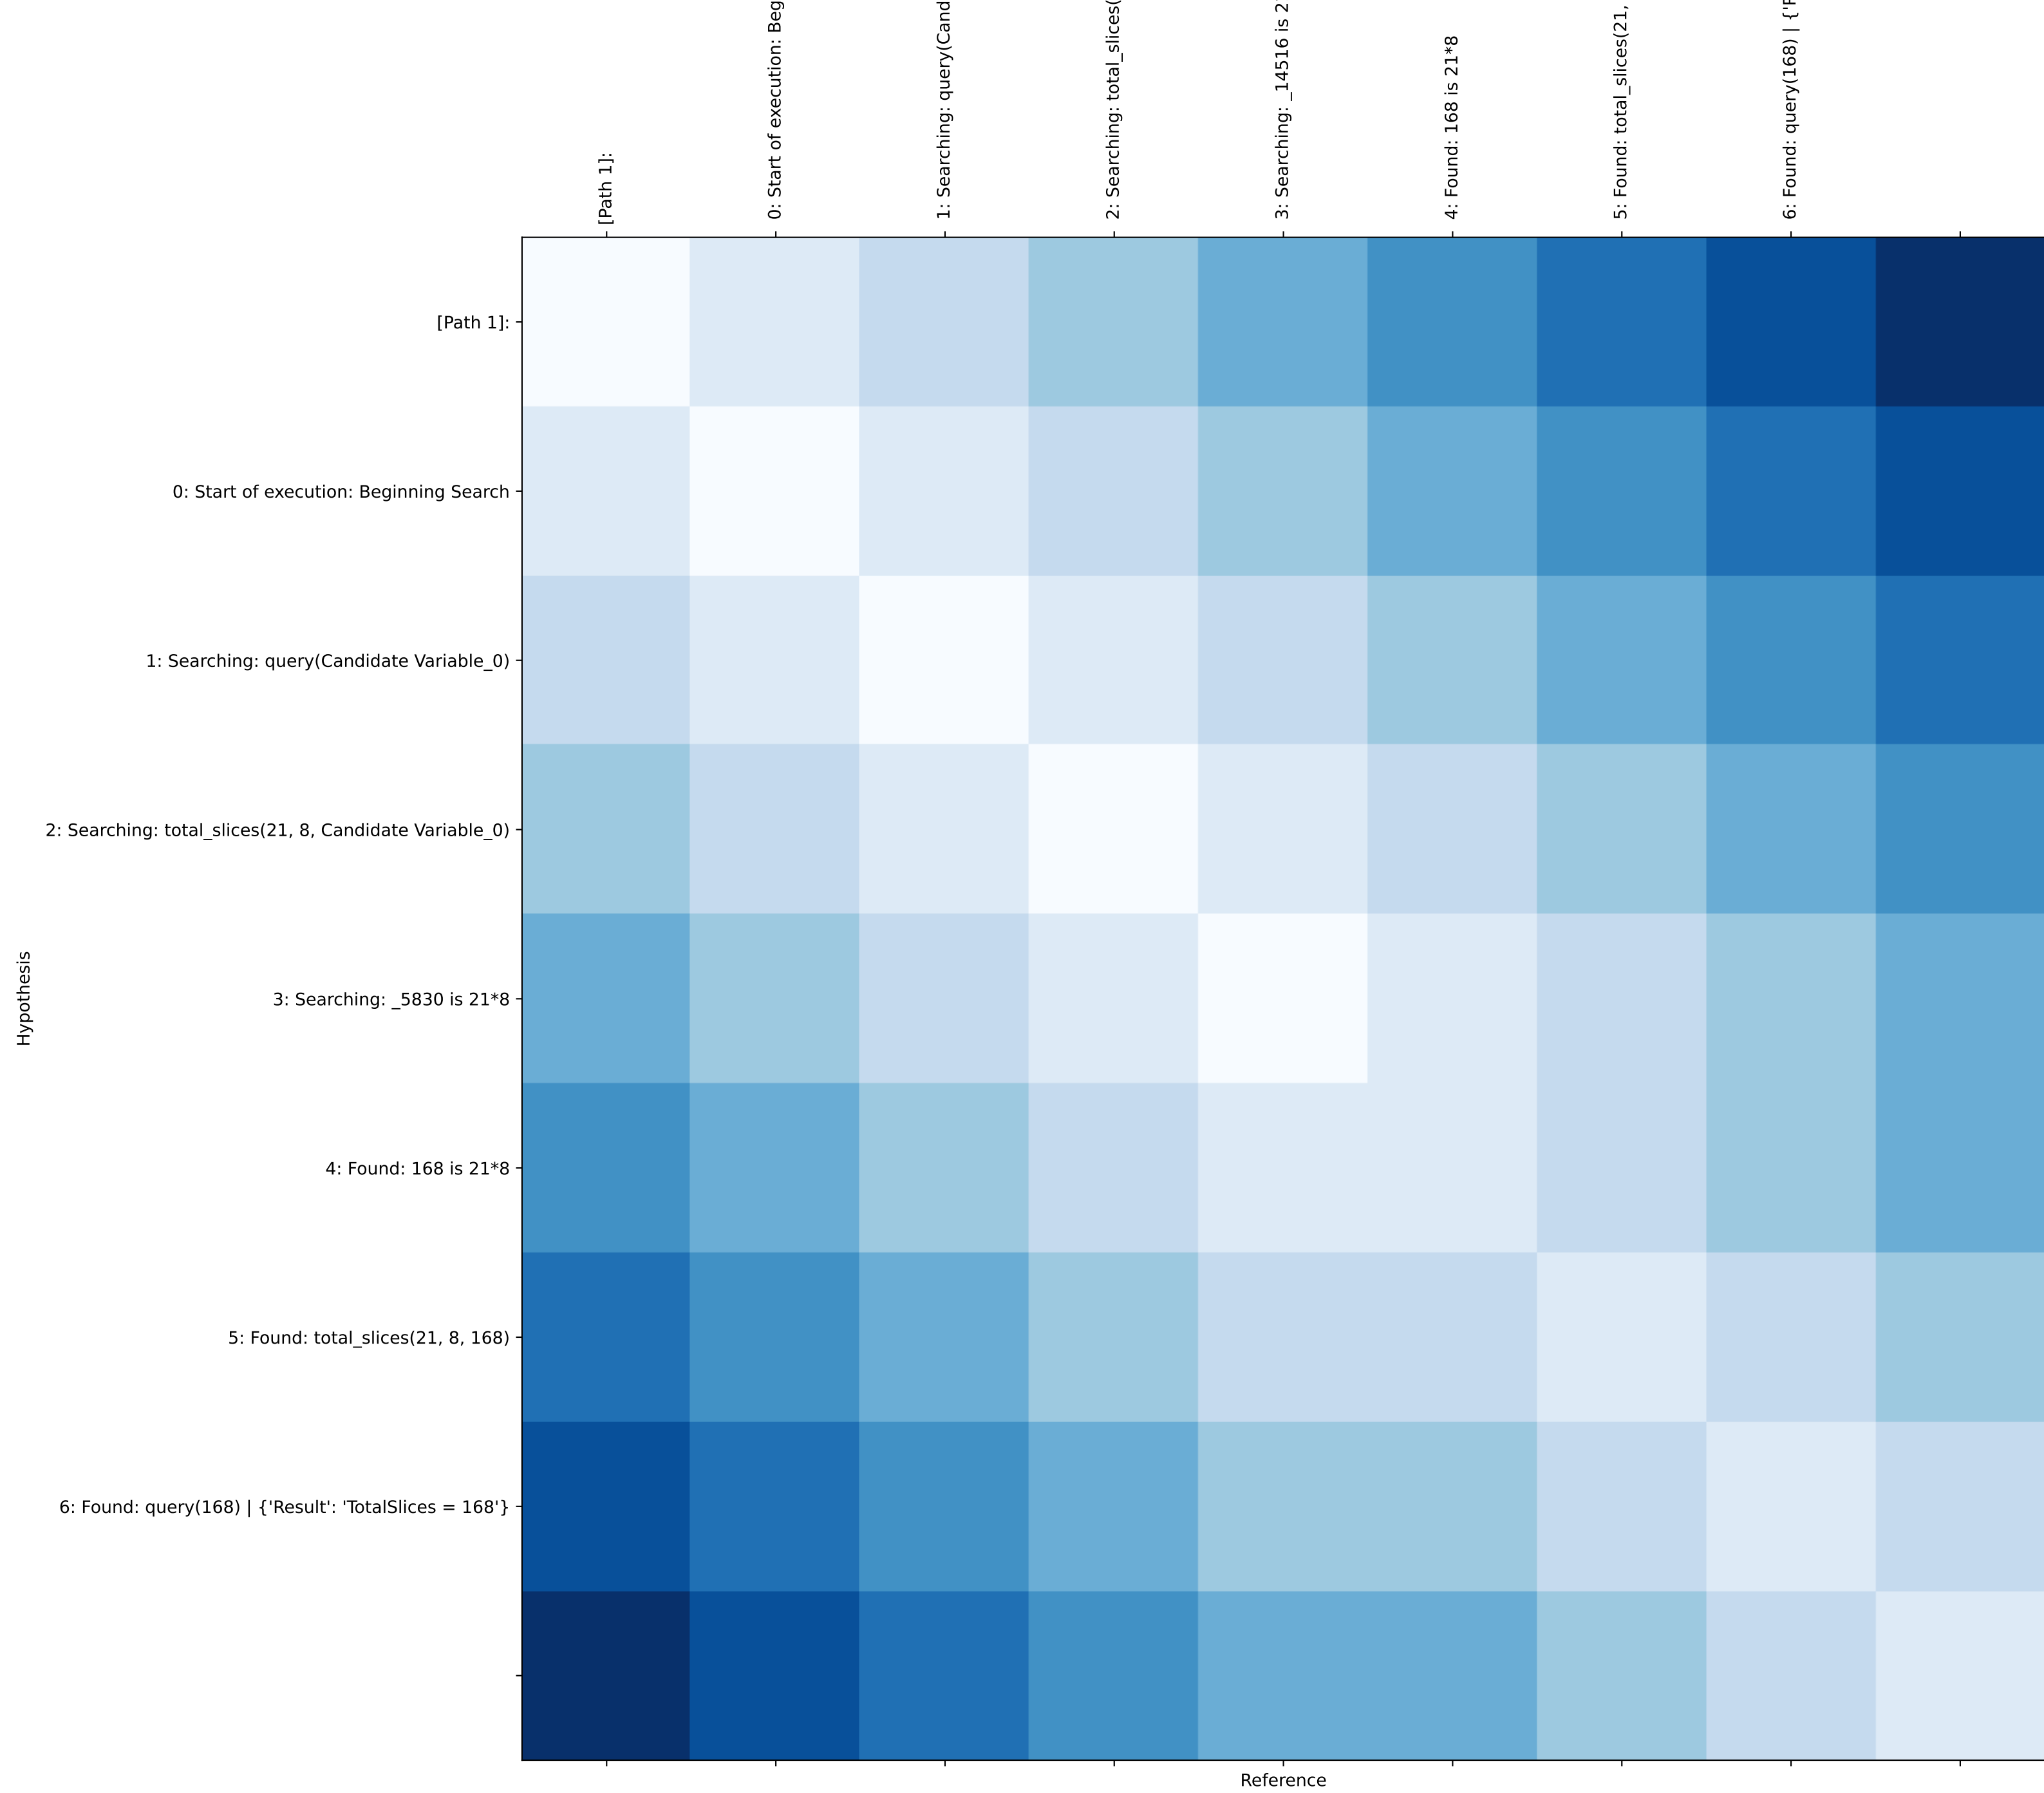

Supplement: supplementary_material [file attachment]

Hypothesis

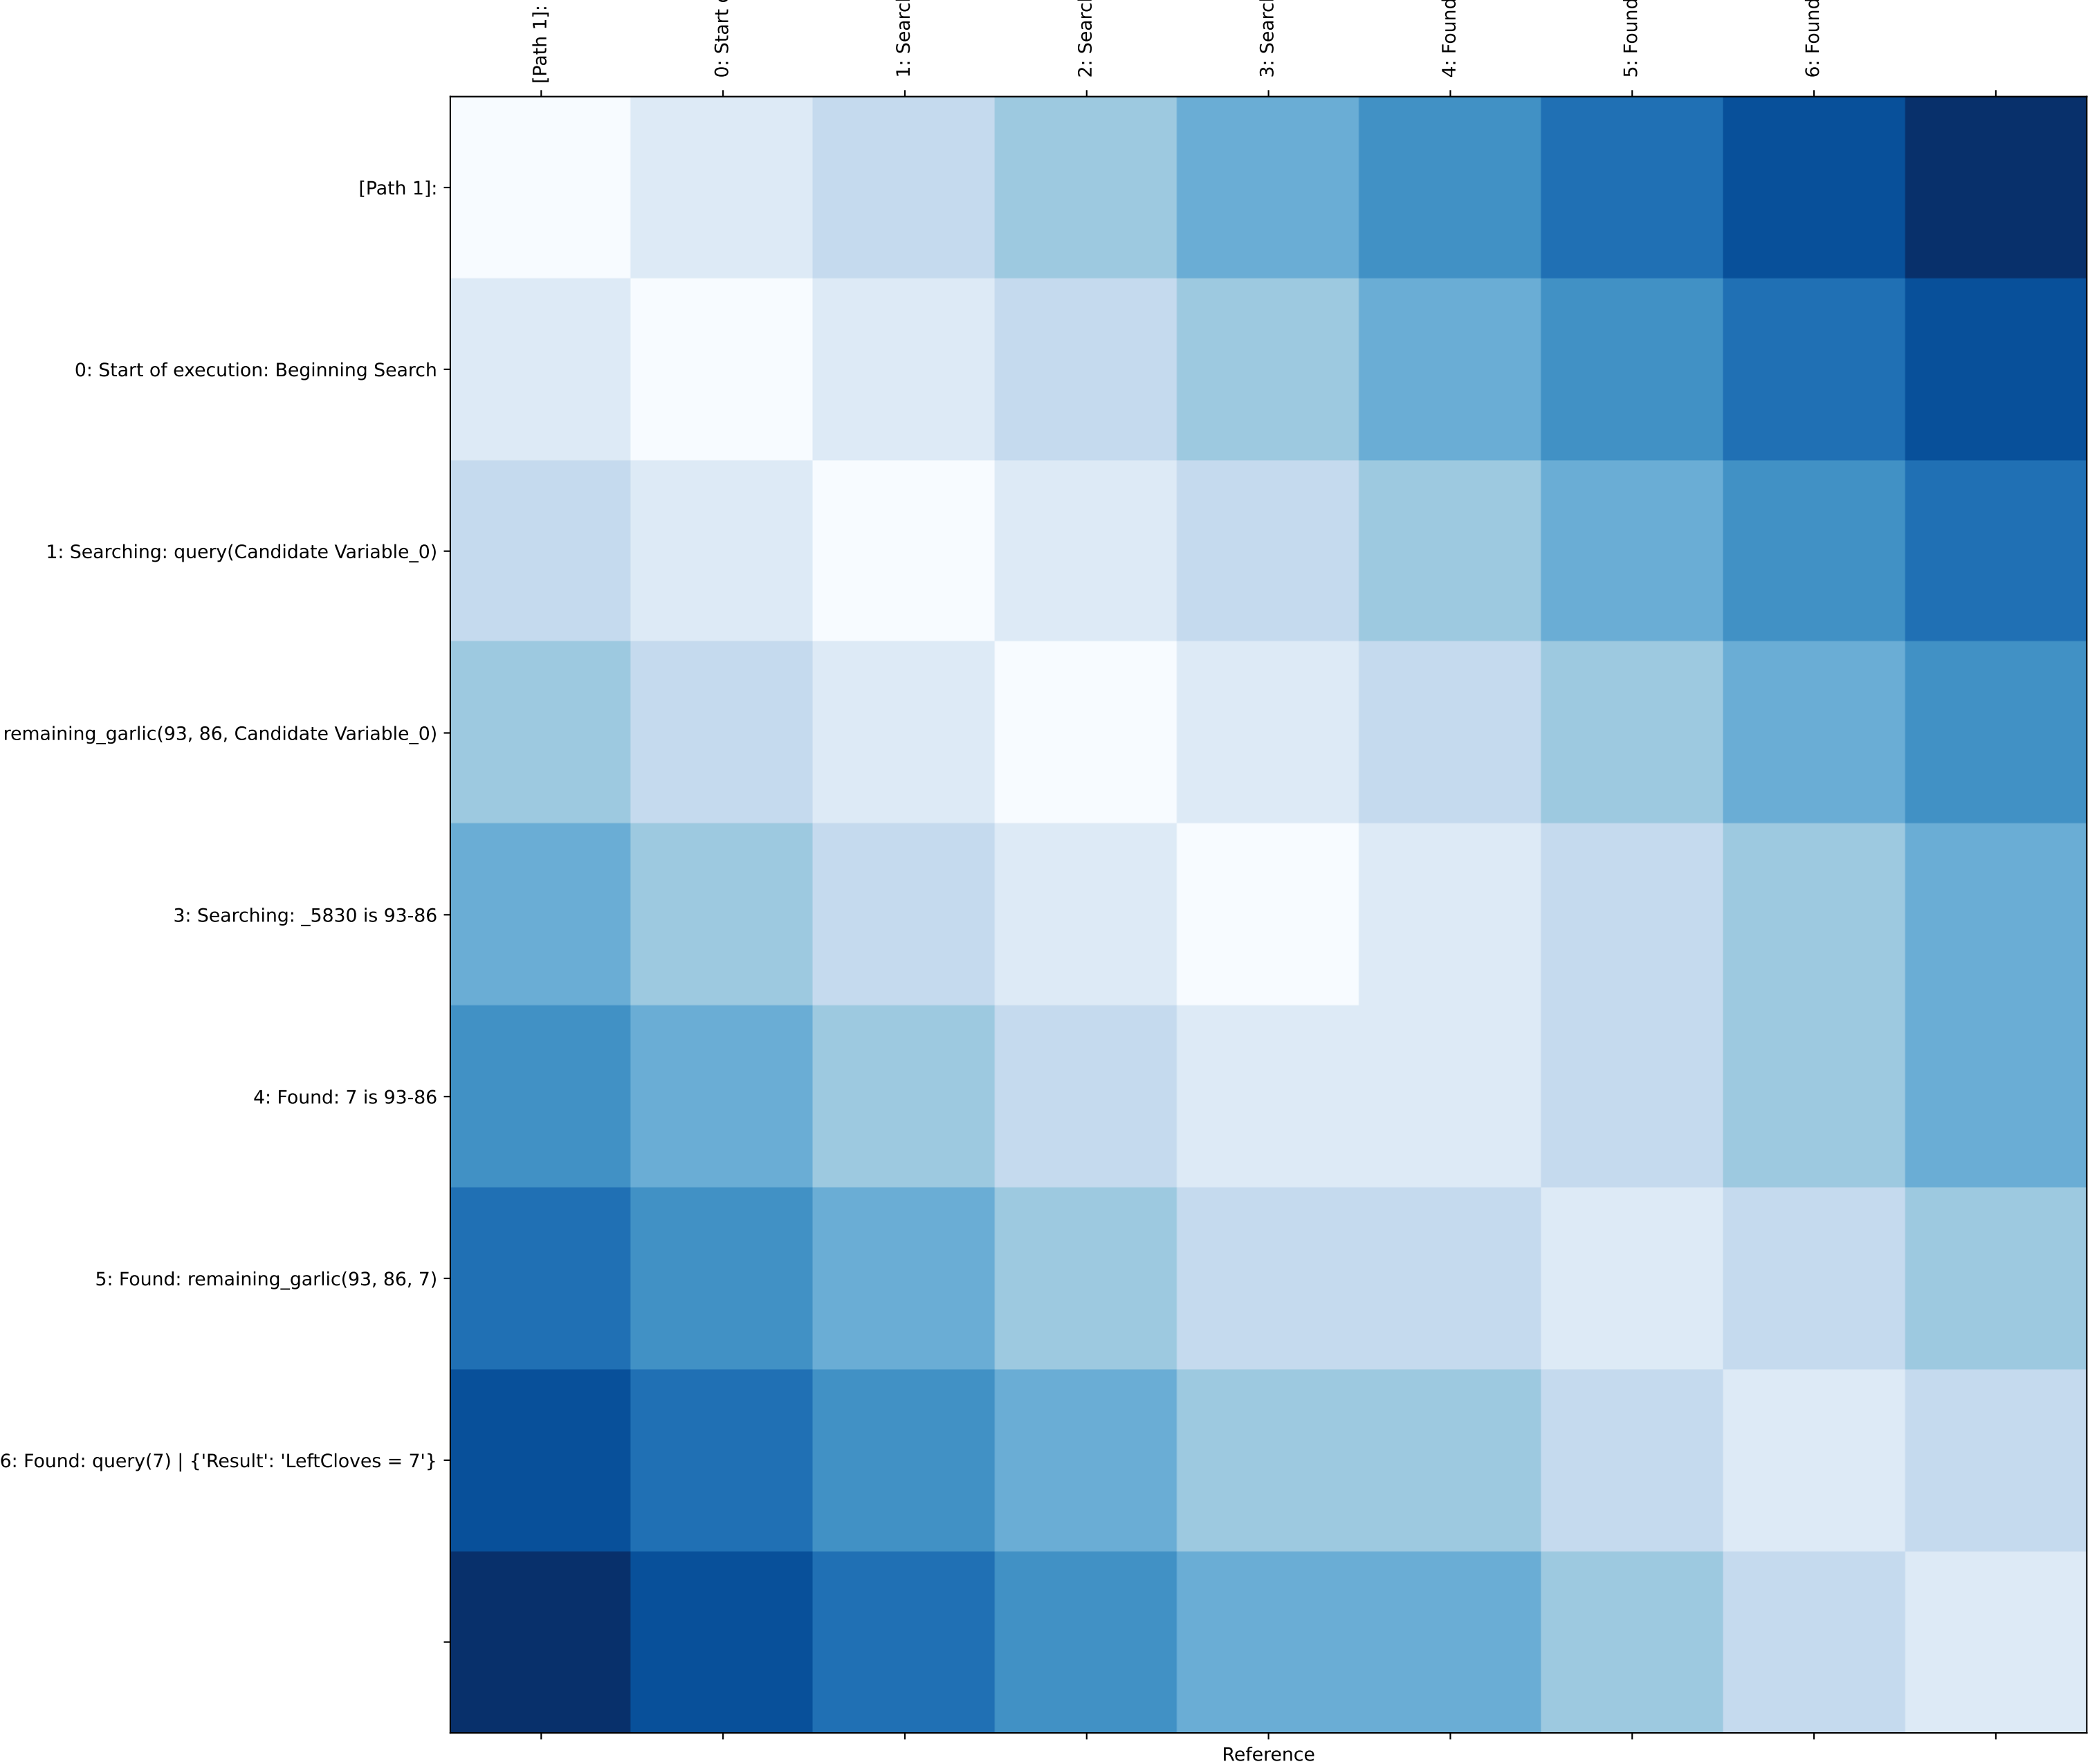

Reference

Supplement: supplementary_material [file attachment]

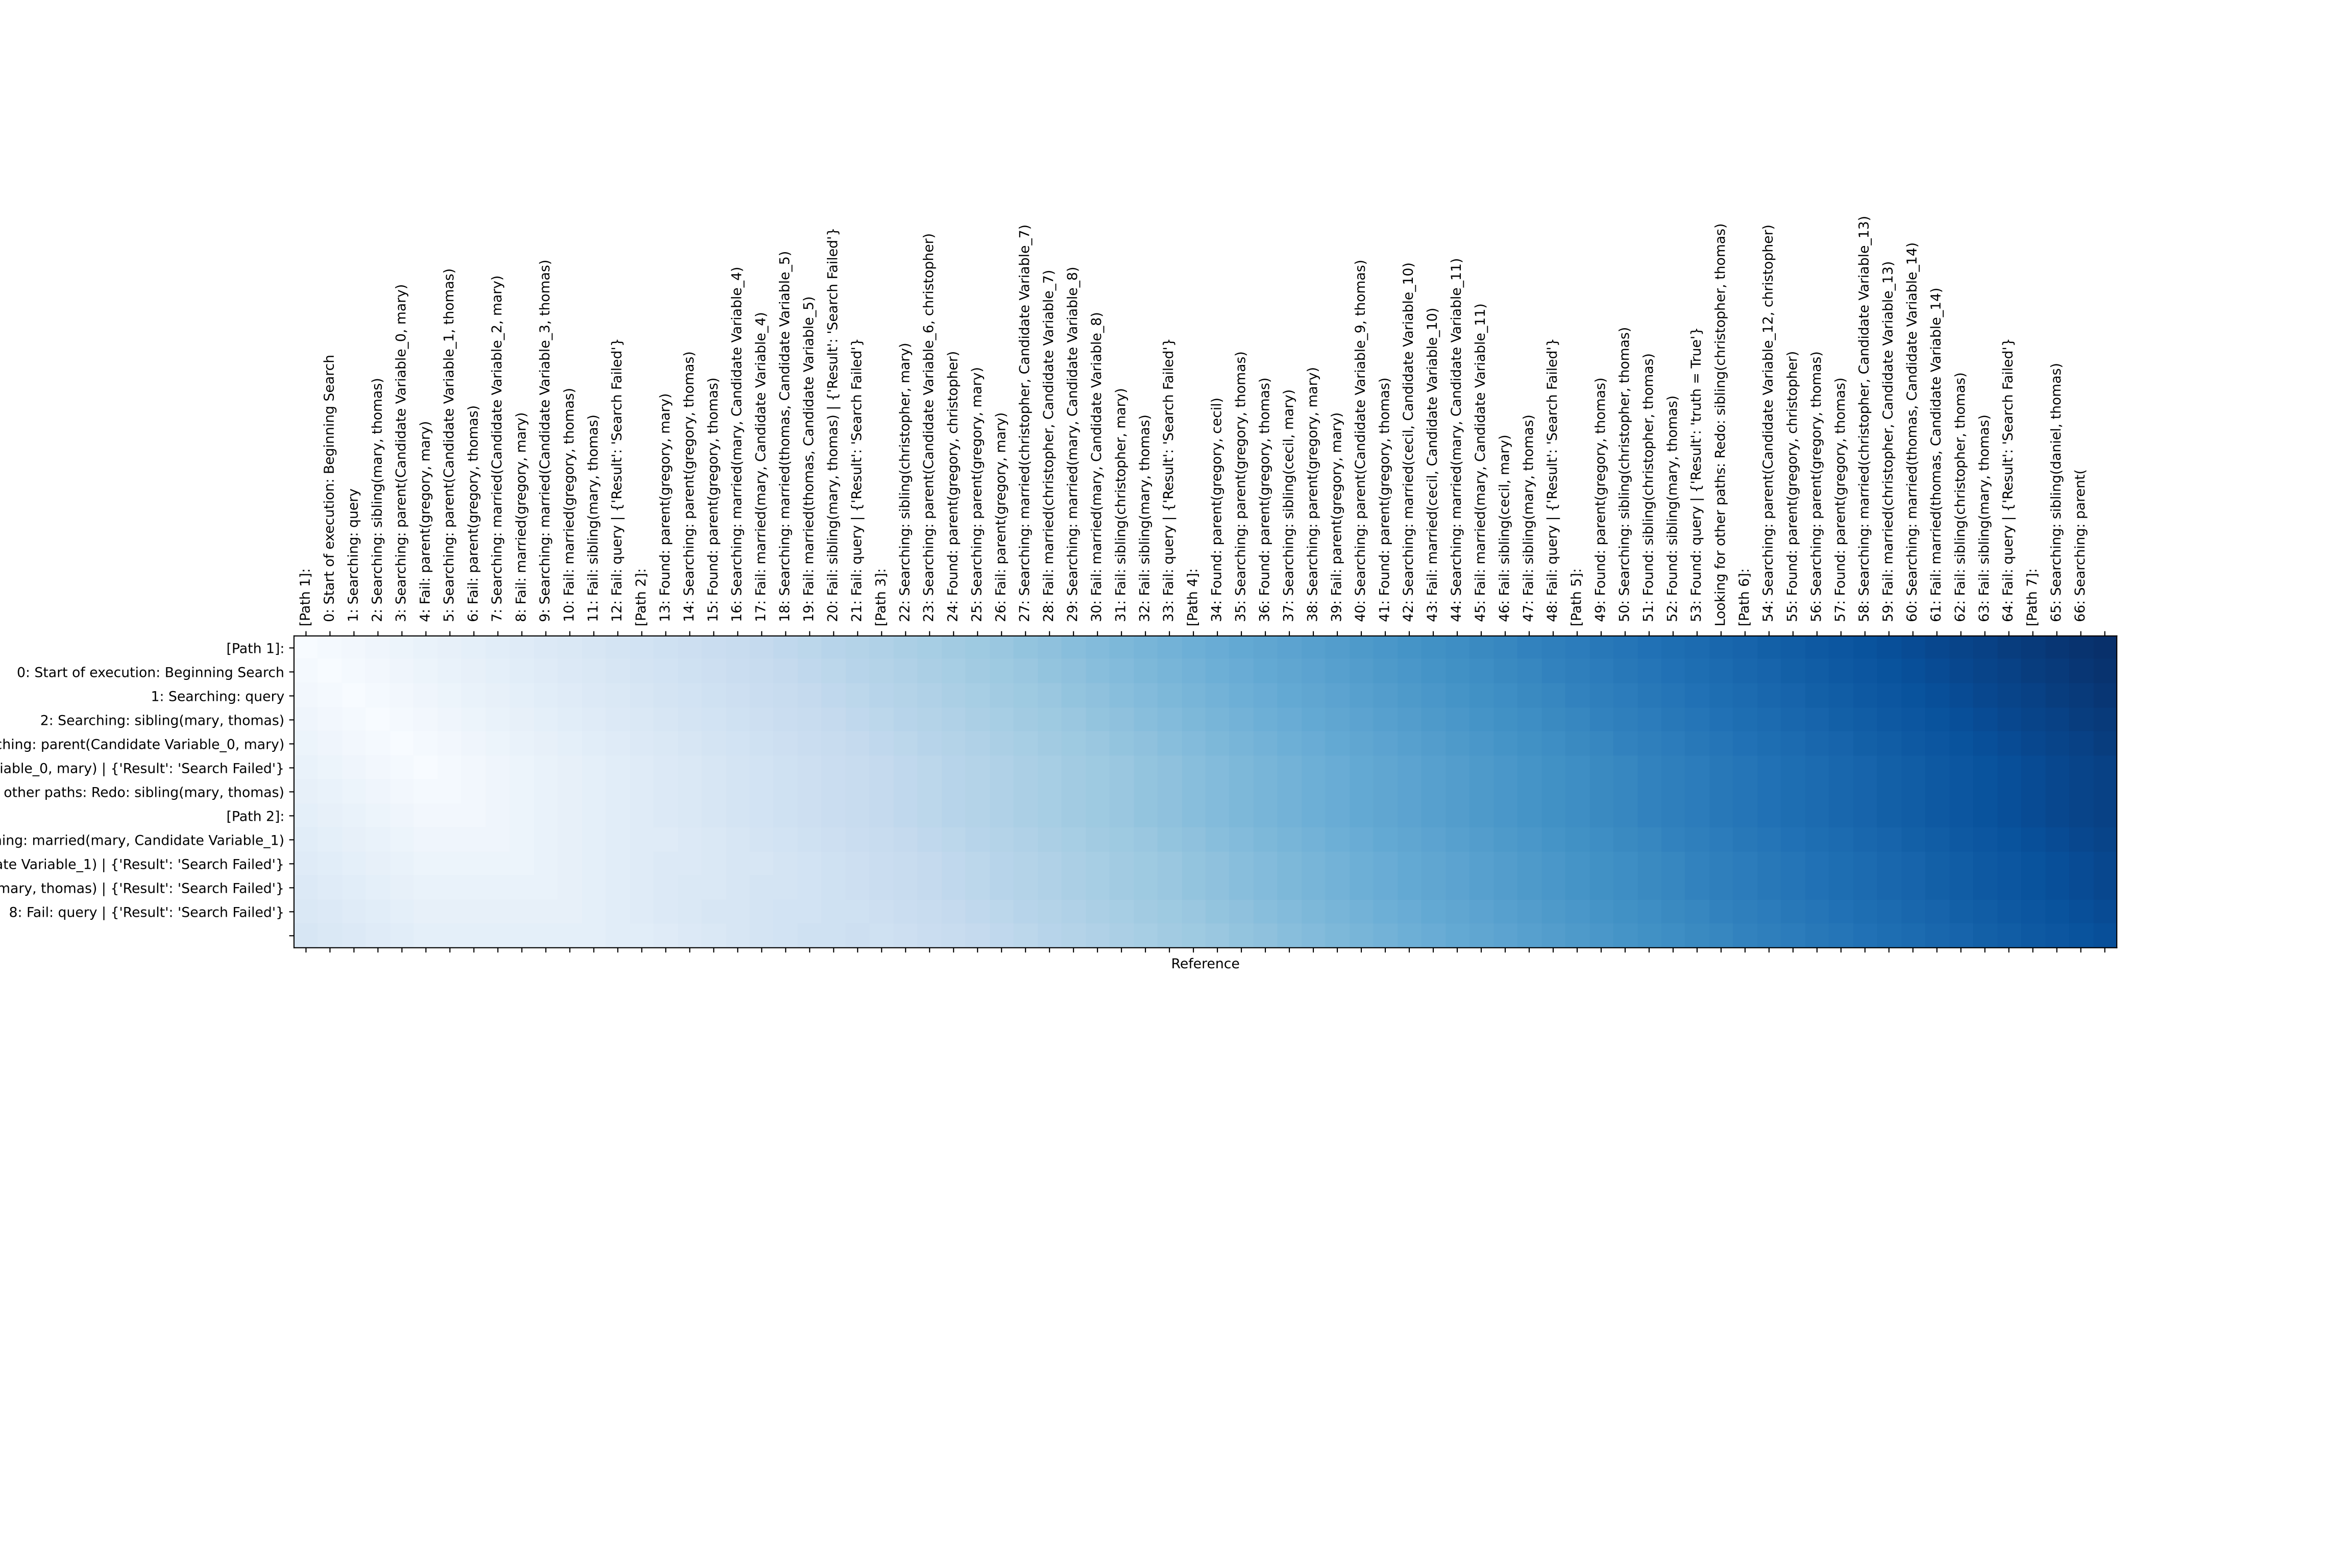

Supplement: supplementary_material [file attachment]

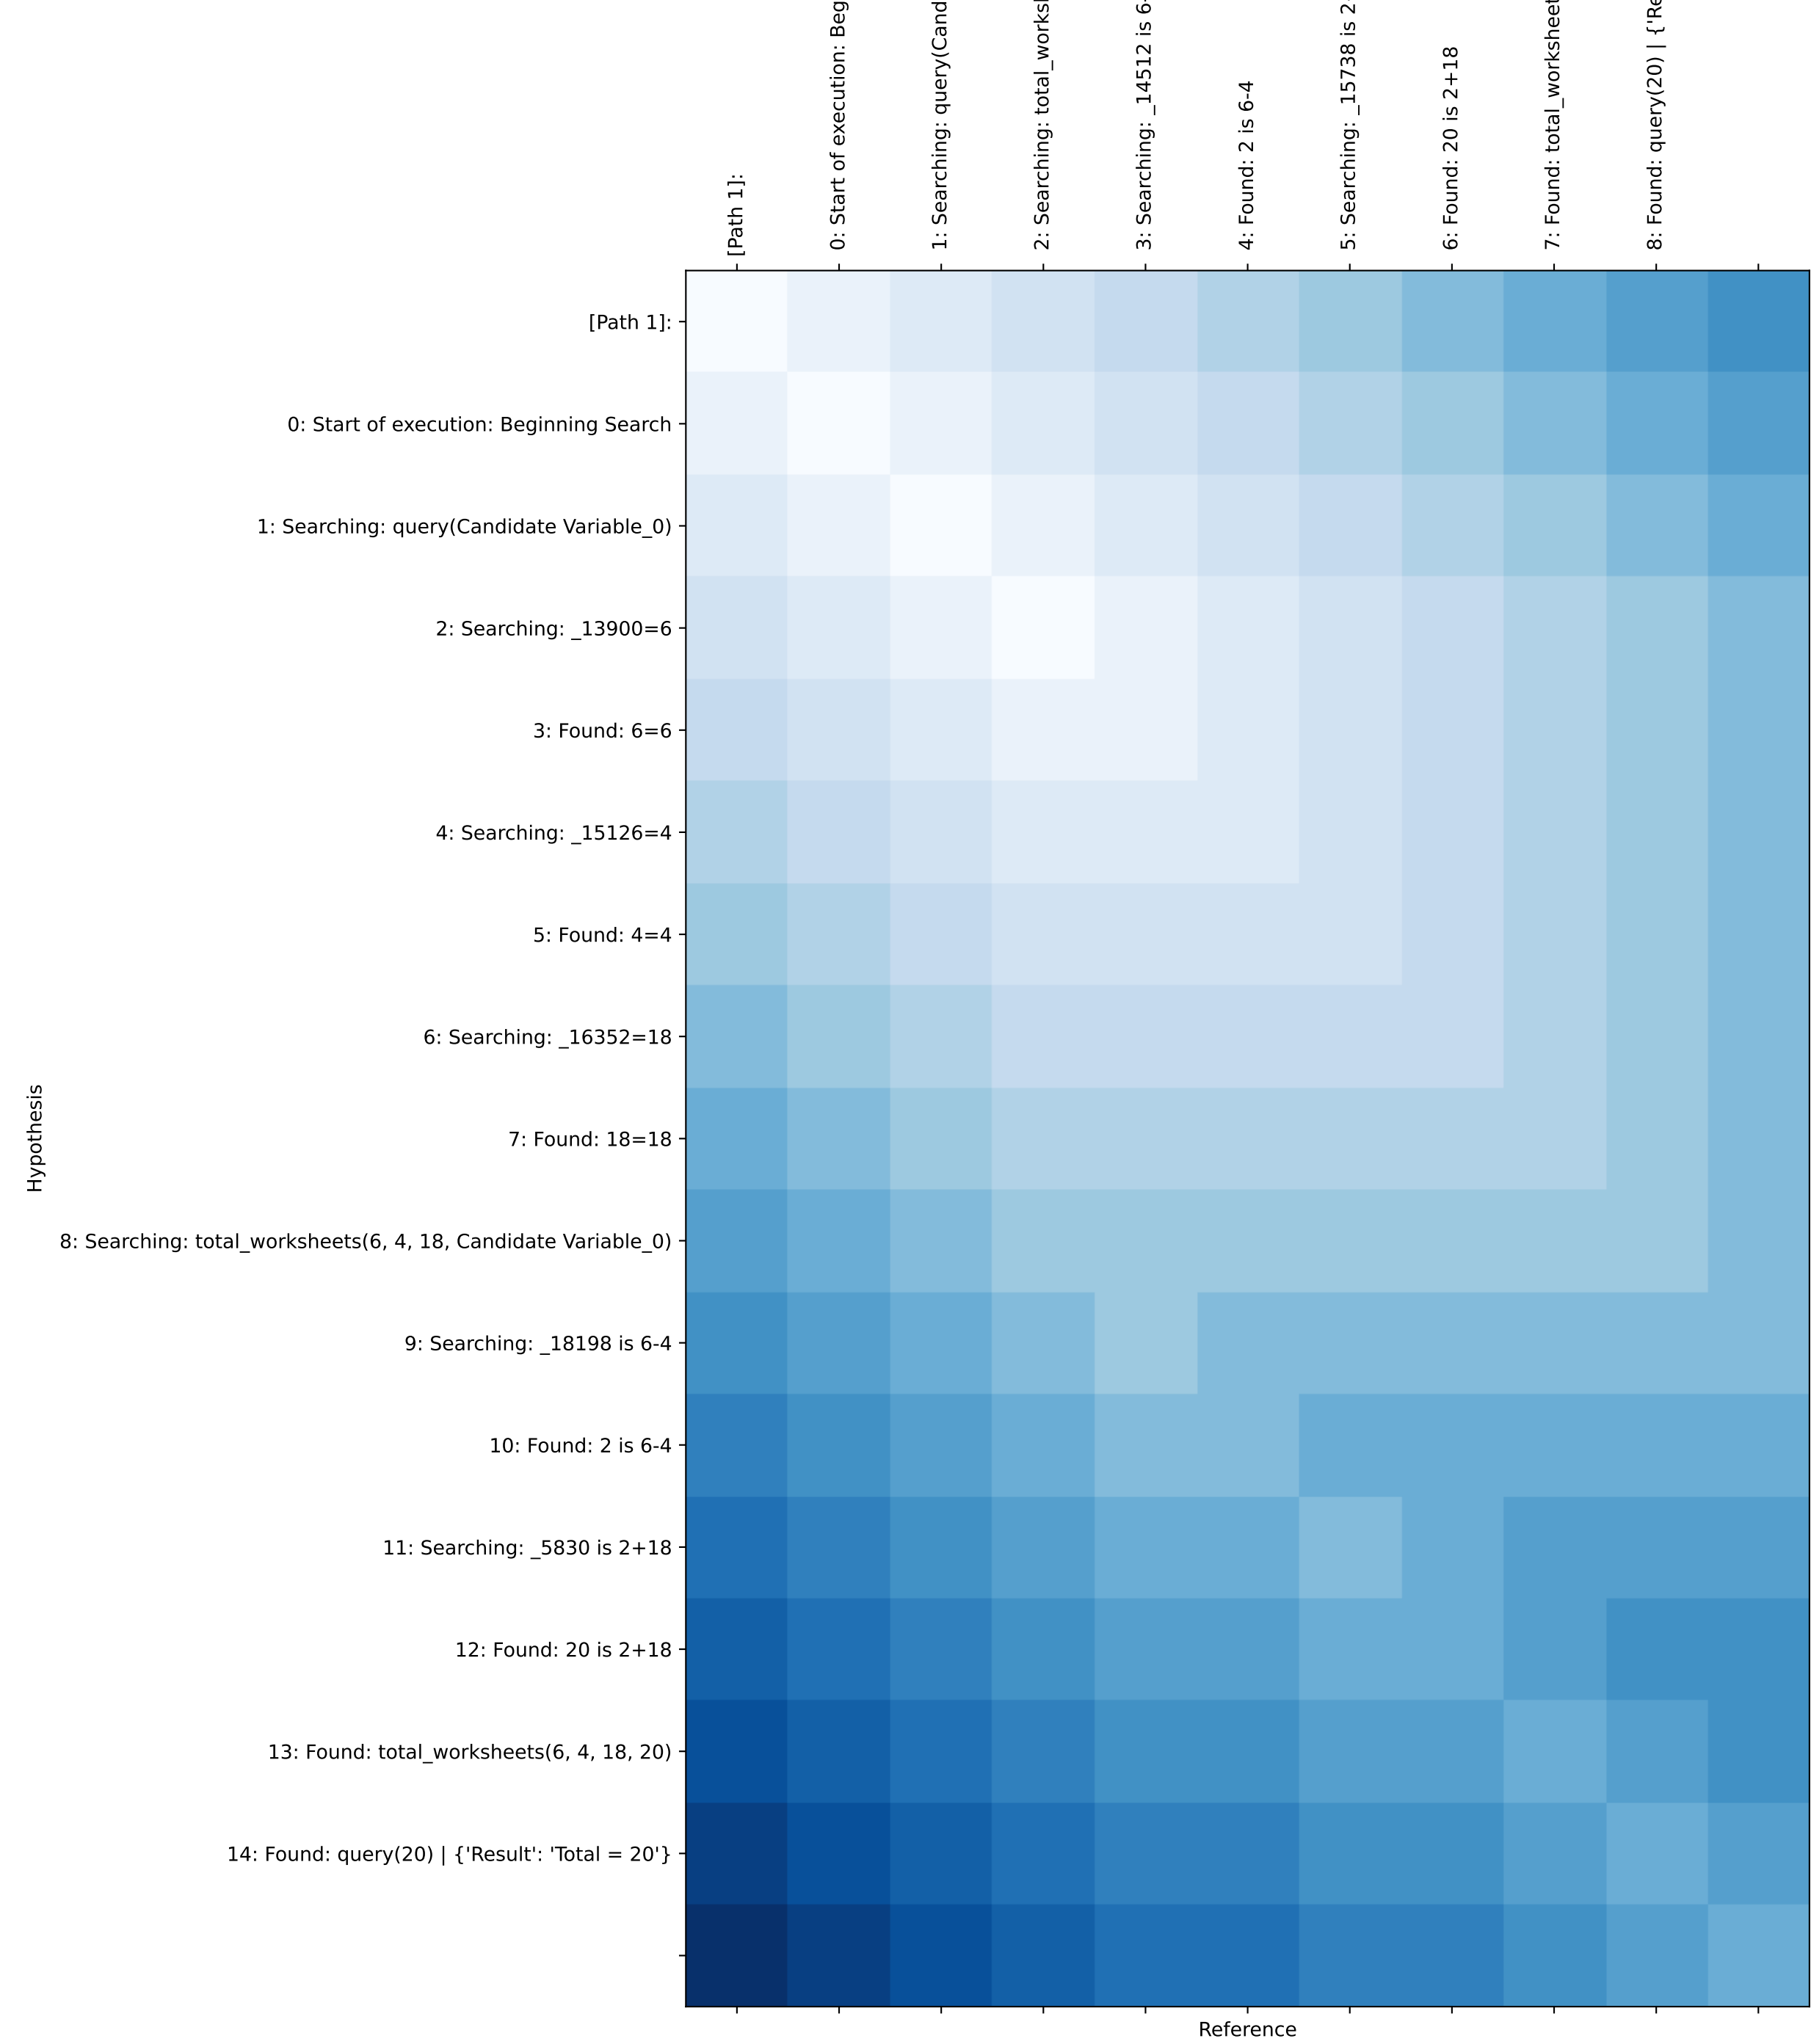

Supplement: supplementary_material [file attachment]

Model Accuracy vs Faithfulness

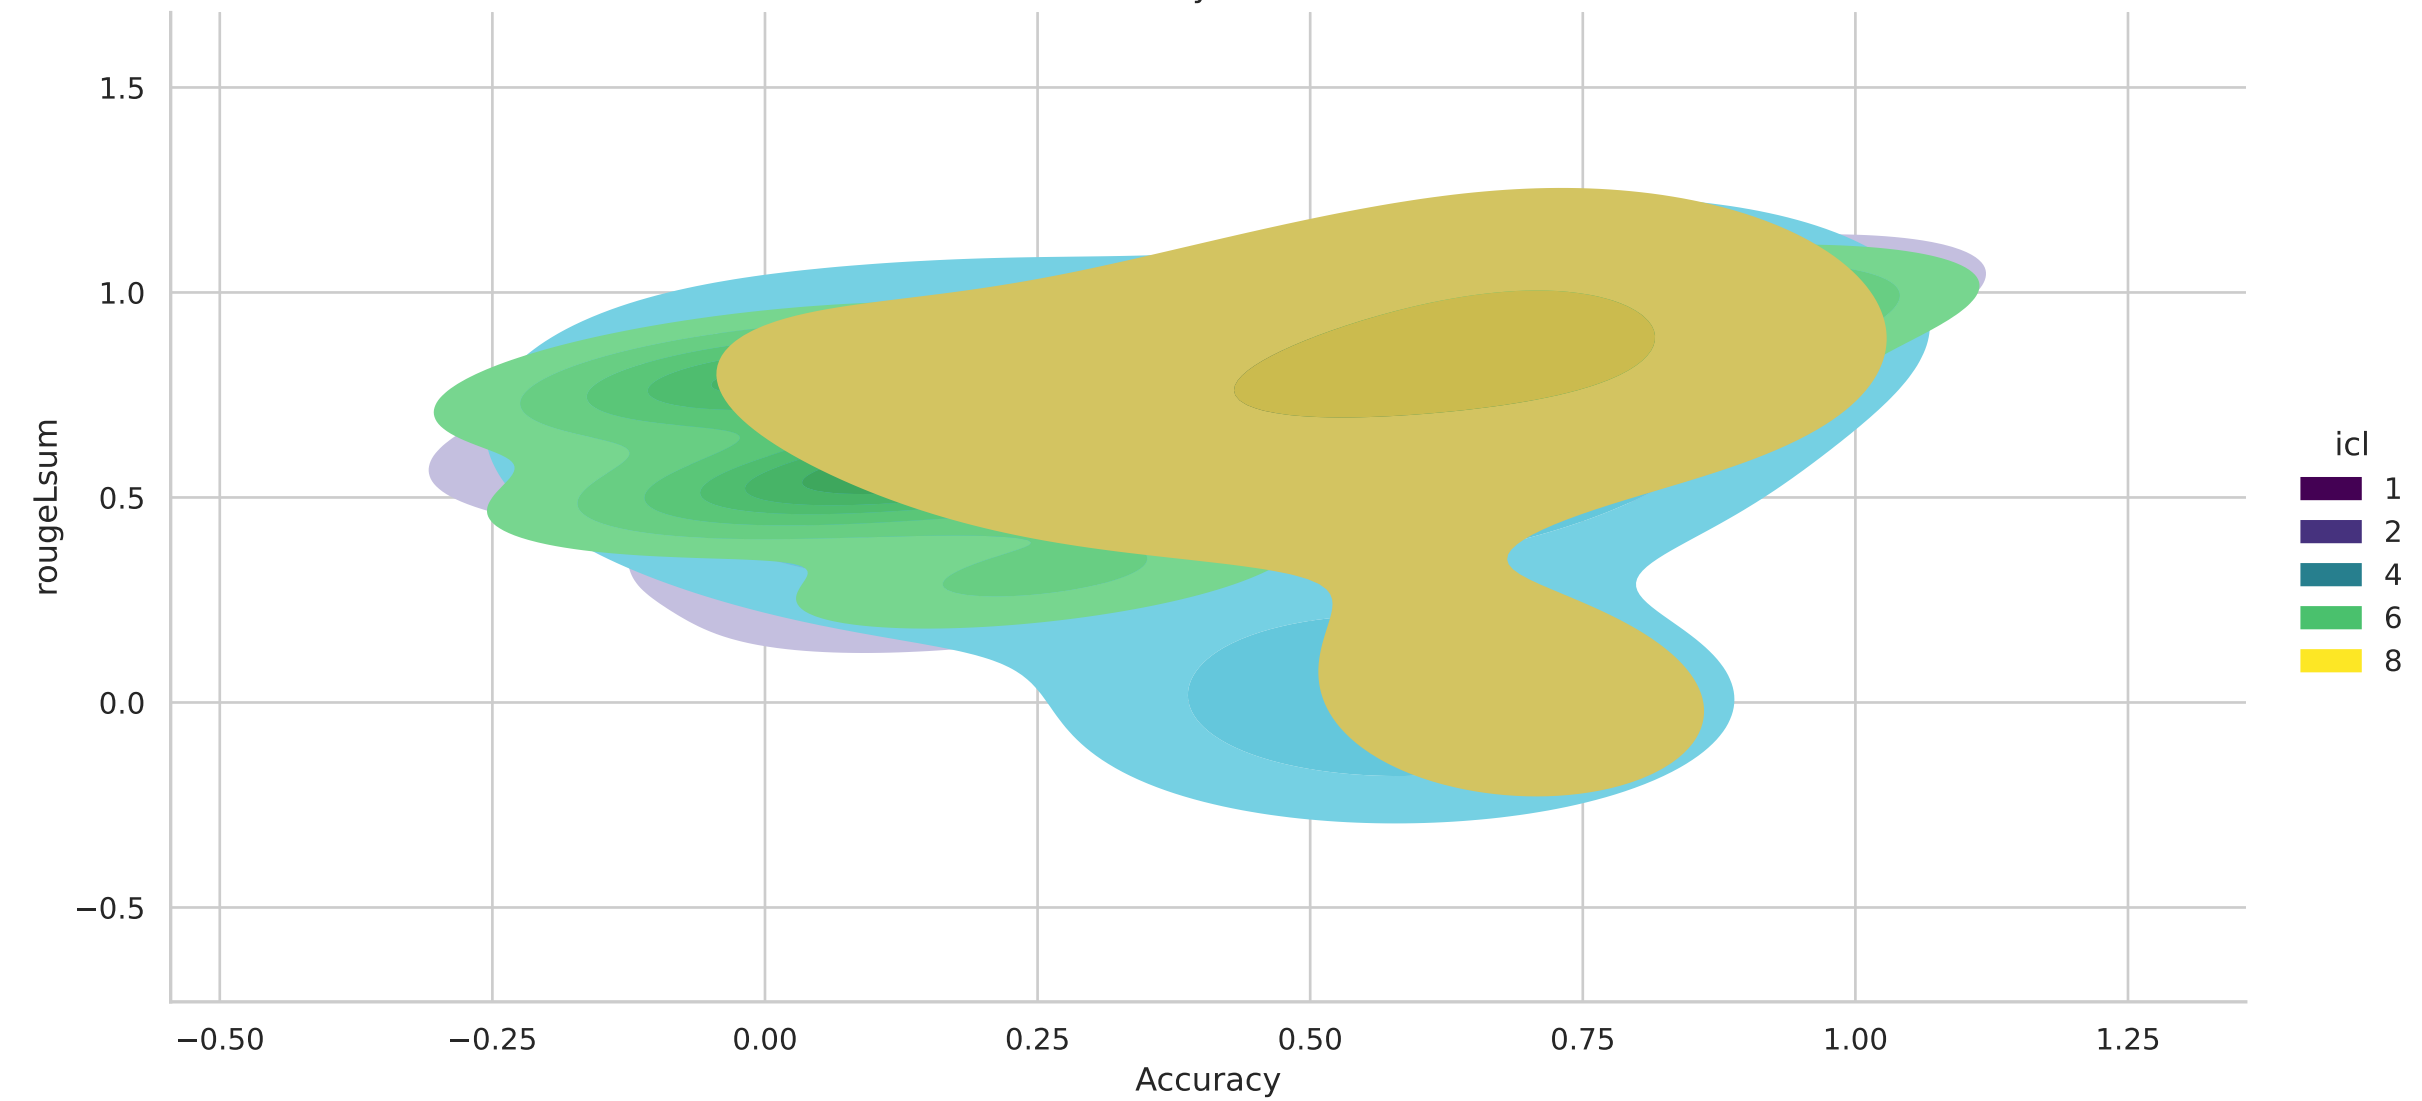

Supplement: supplementary_material [file attachment]

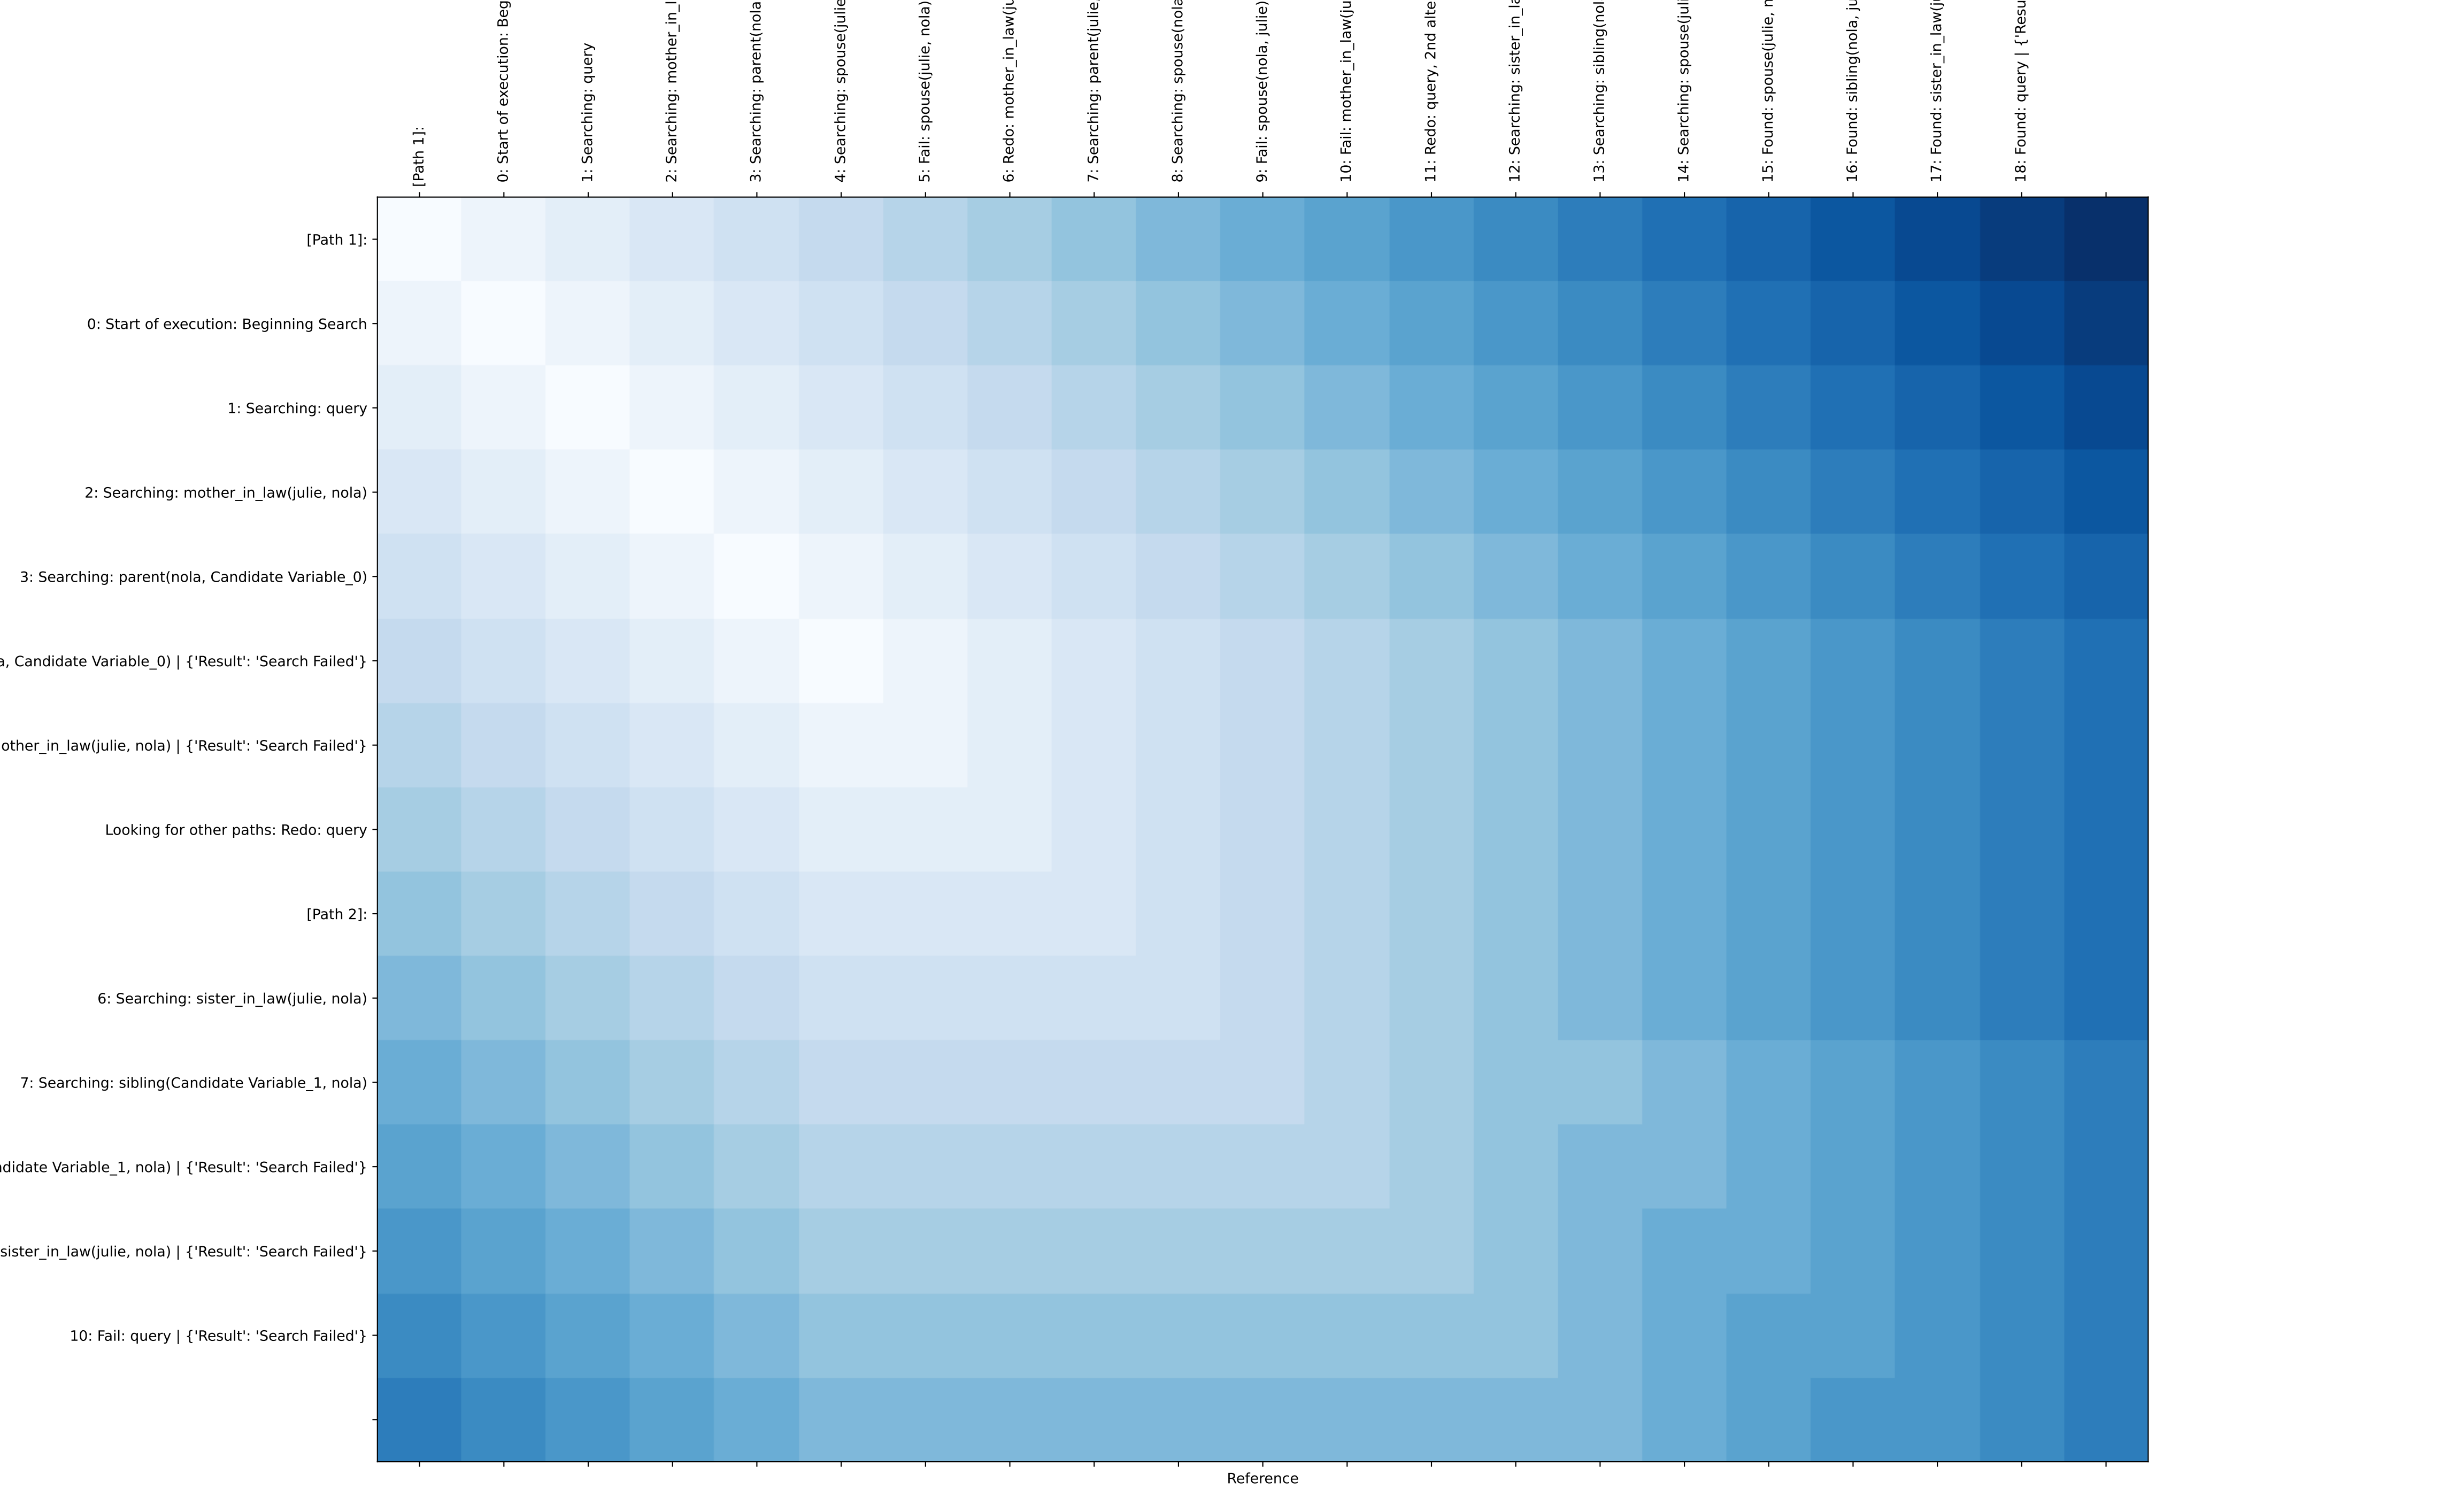

Supplement: supplementary_material [file attachment]

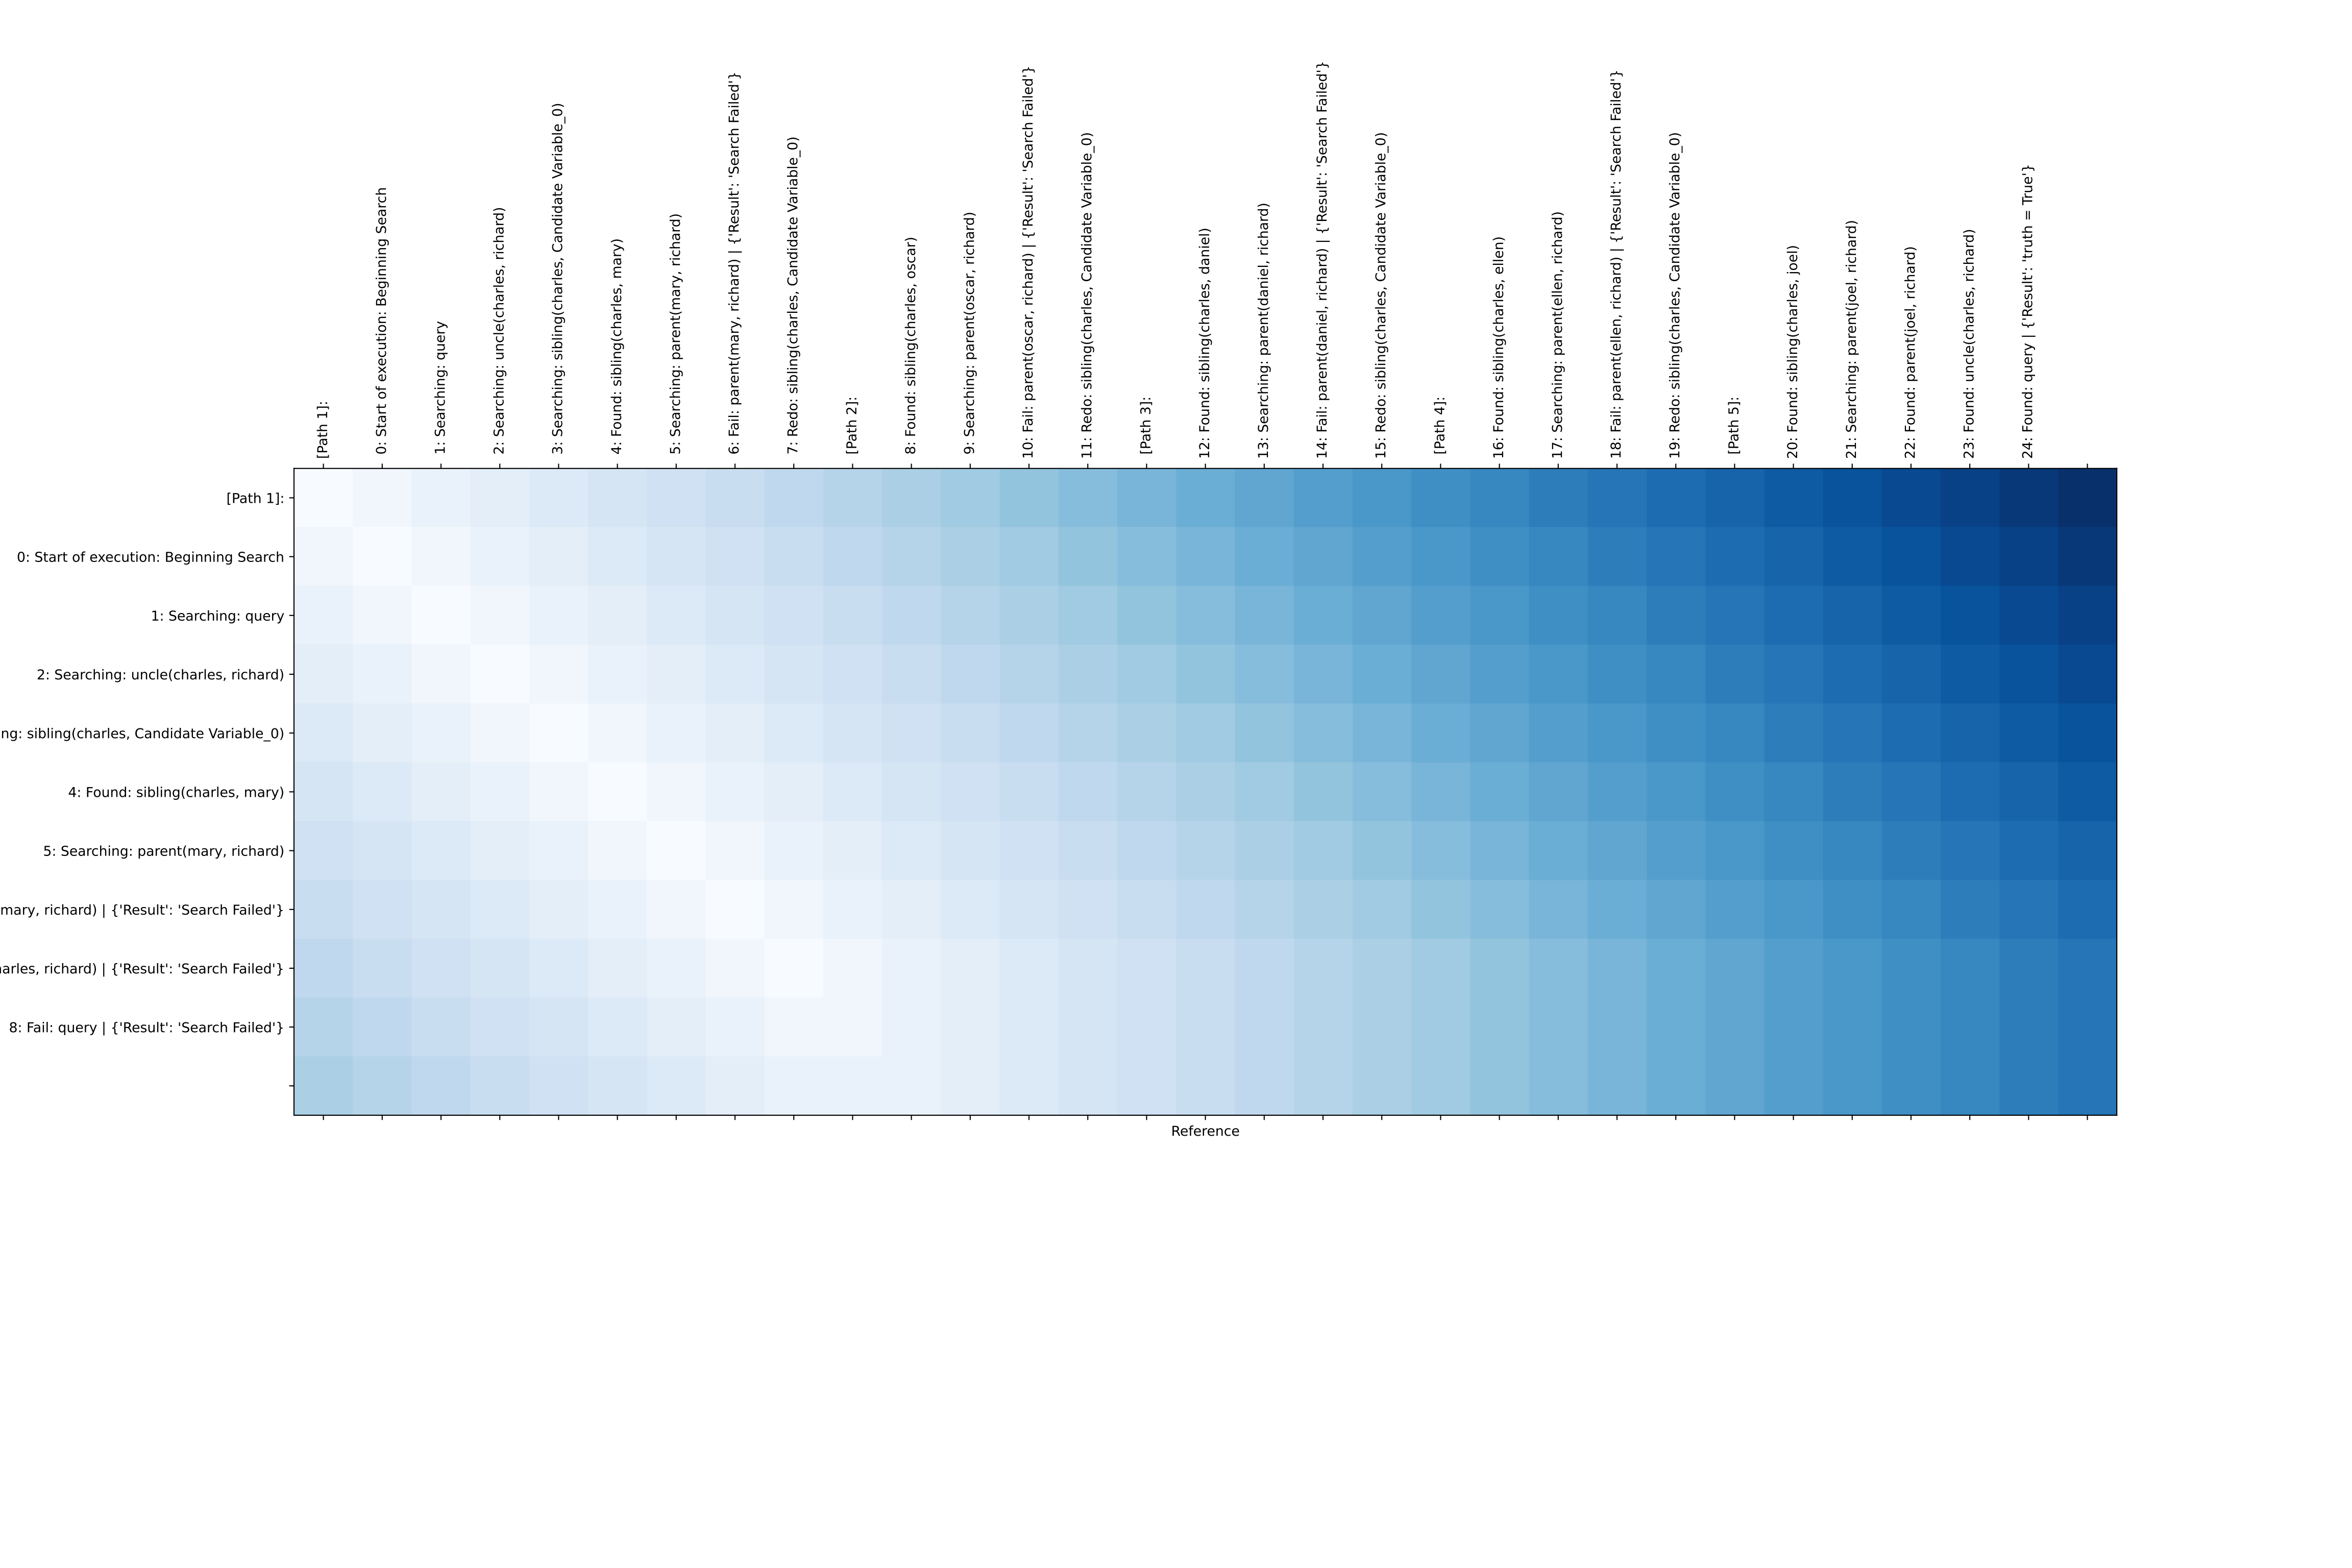

Supplement: supplementary_material [file attachment]

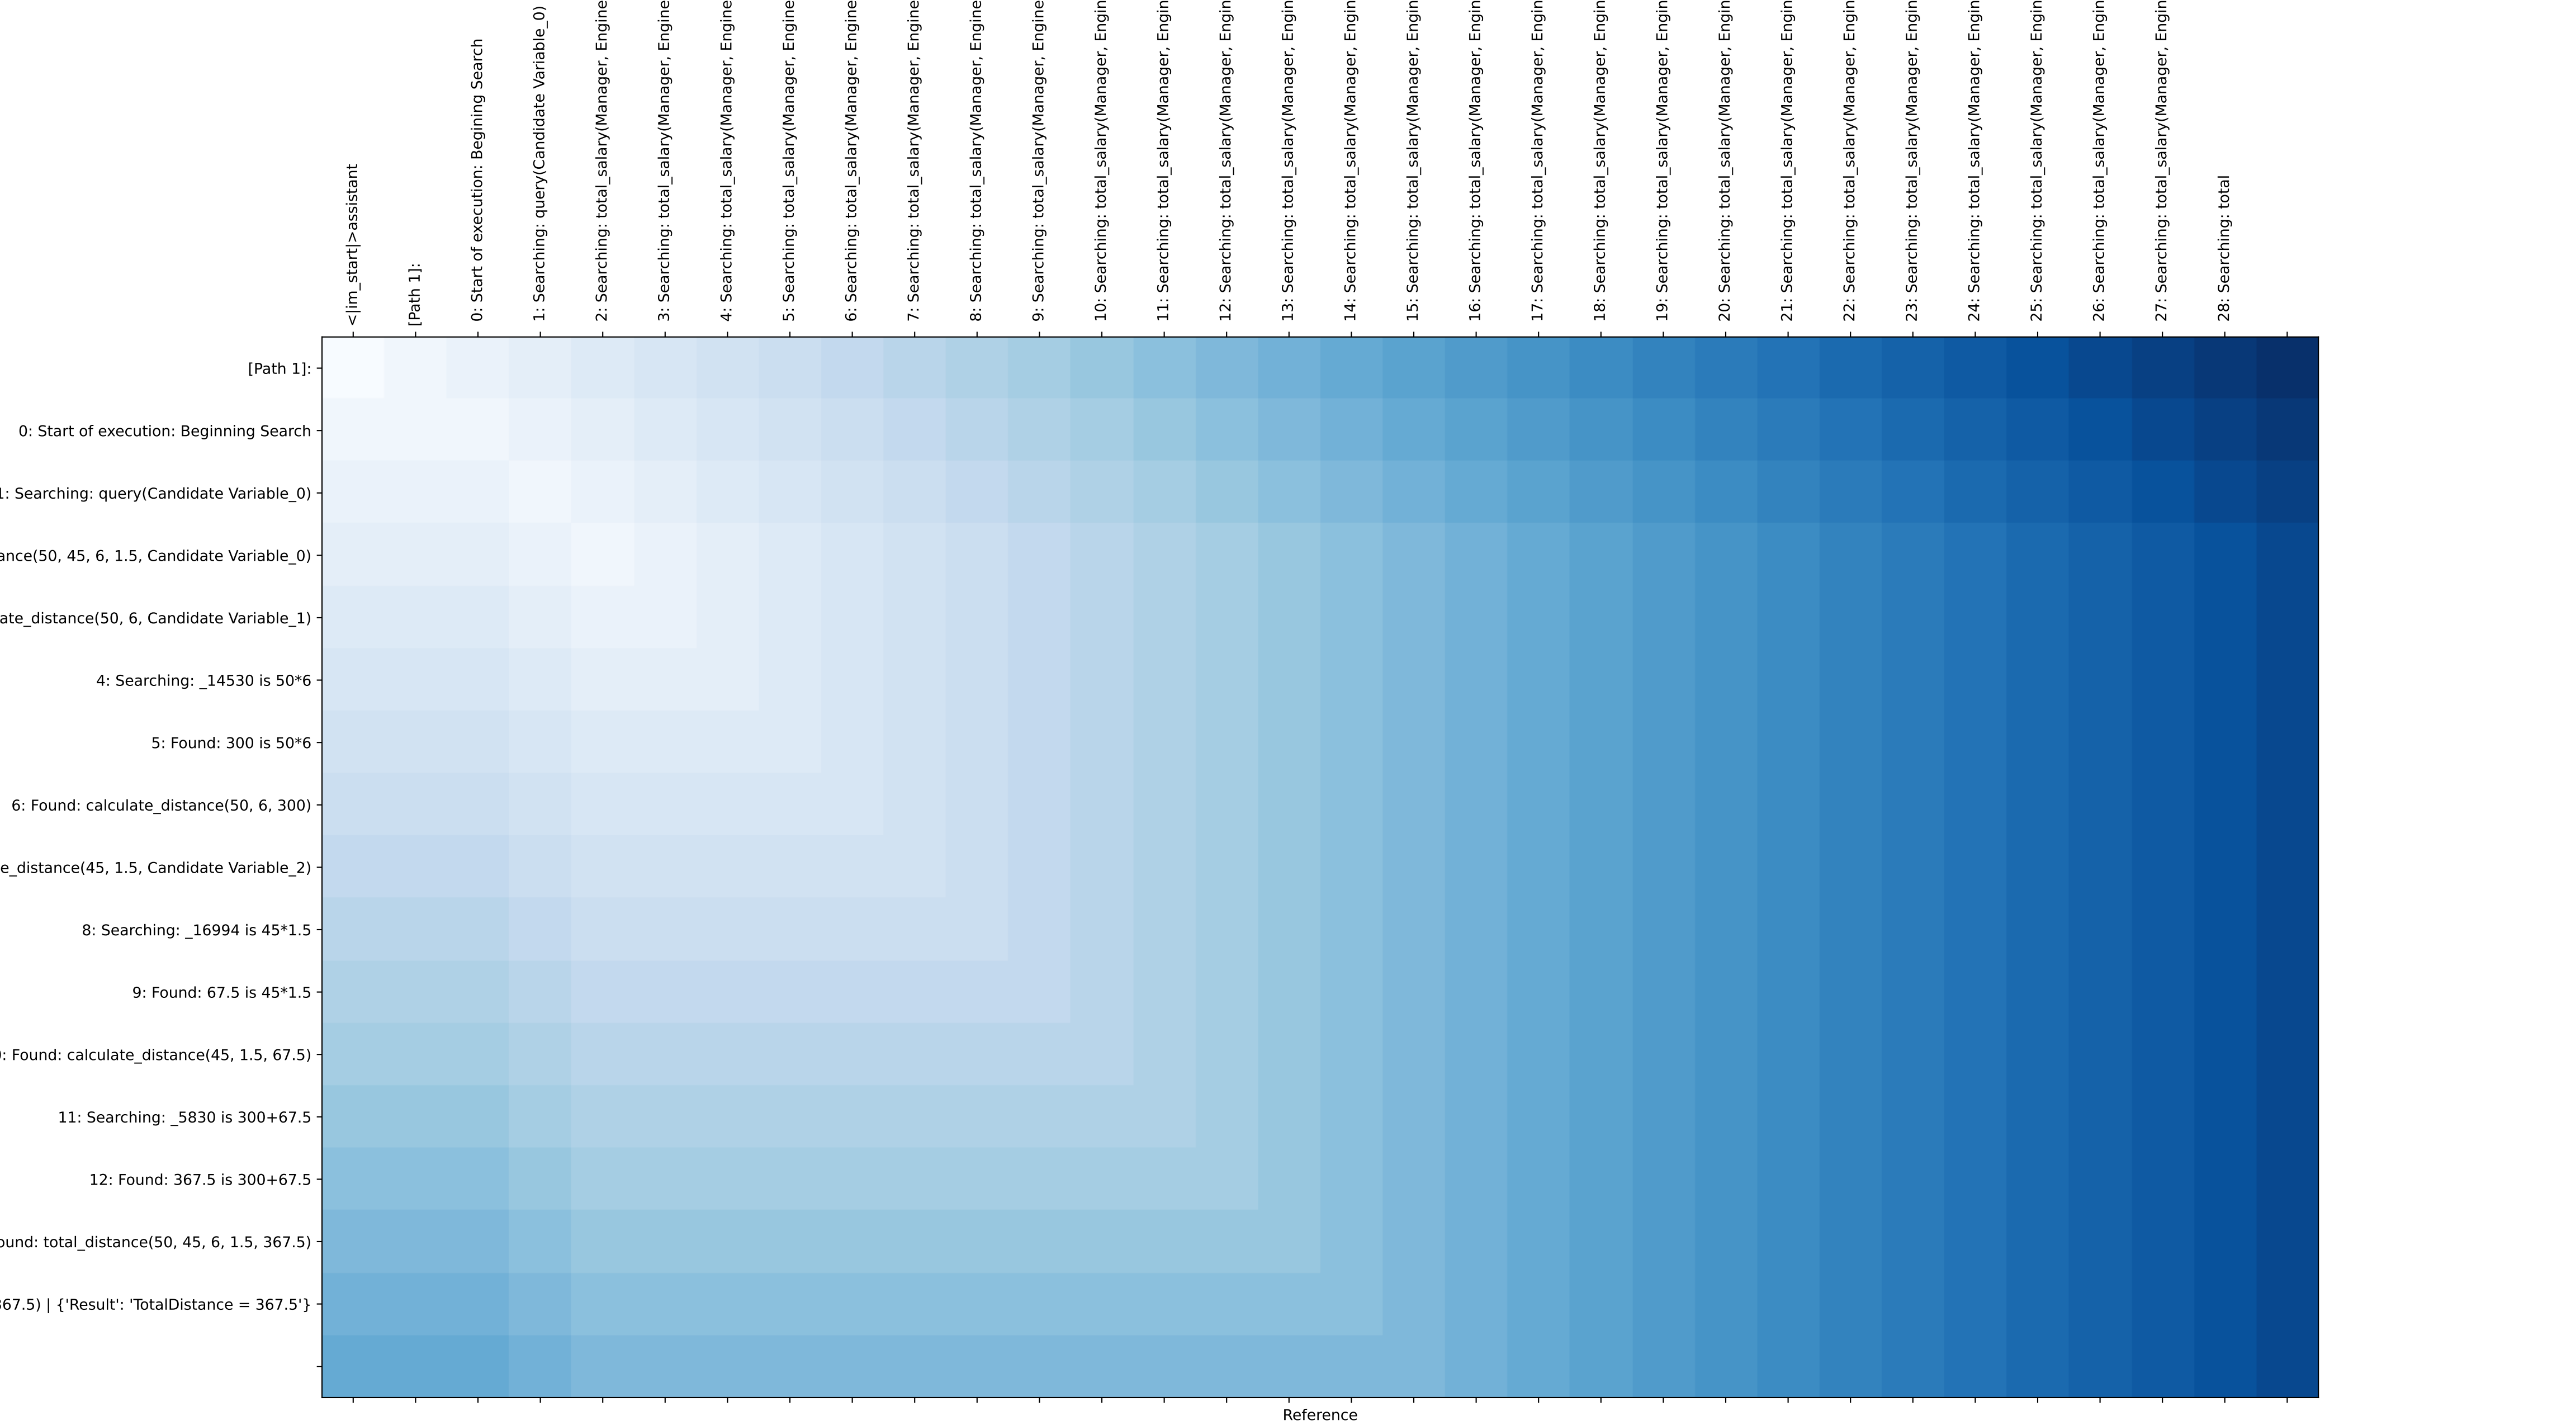

Supplement: supplementary_material [file attachment]

Hypothesis

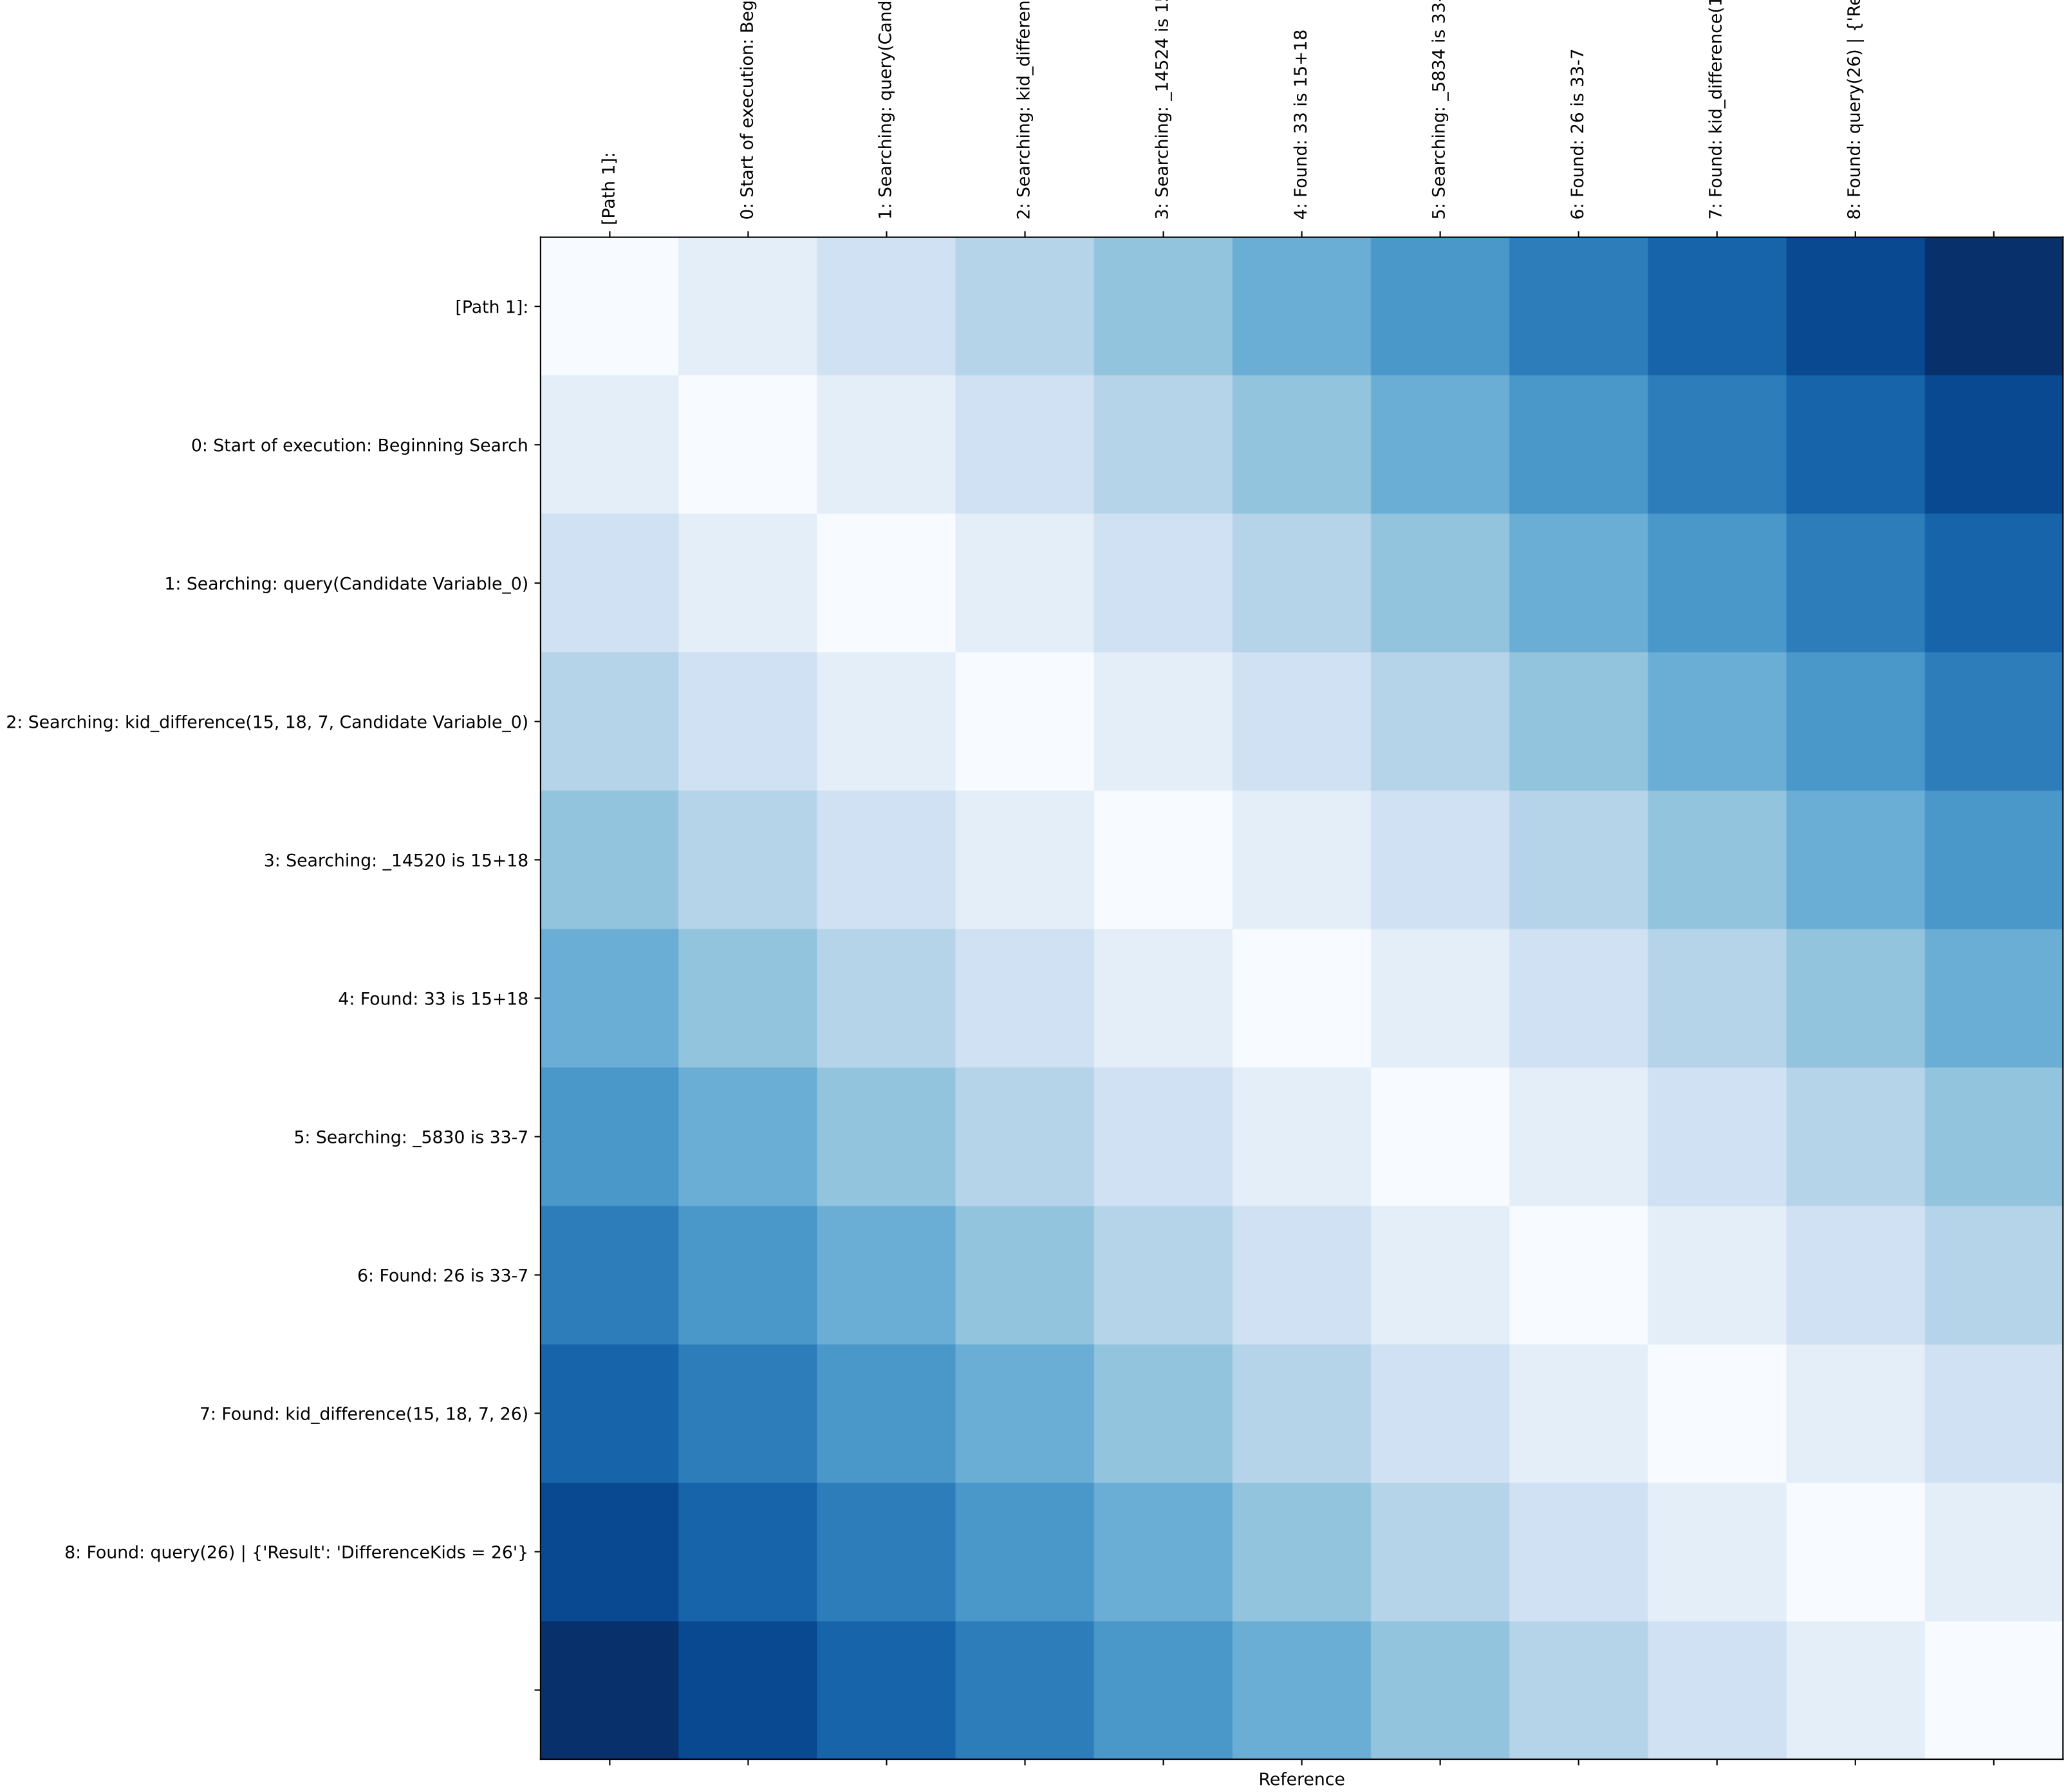

Supplement: supplementary_material [file attachment]

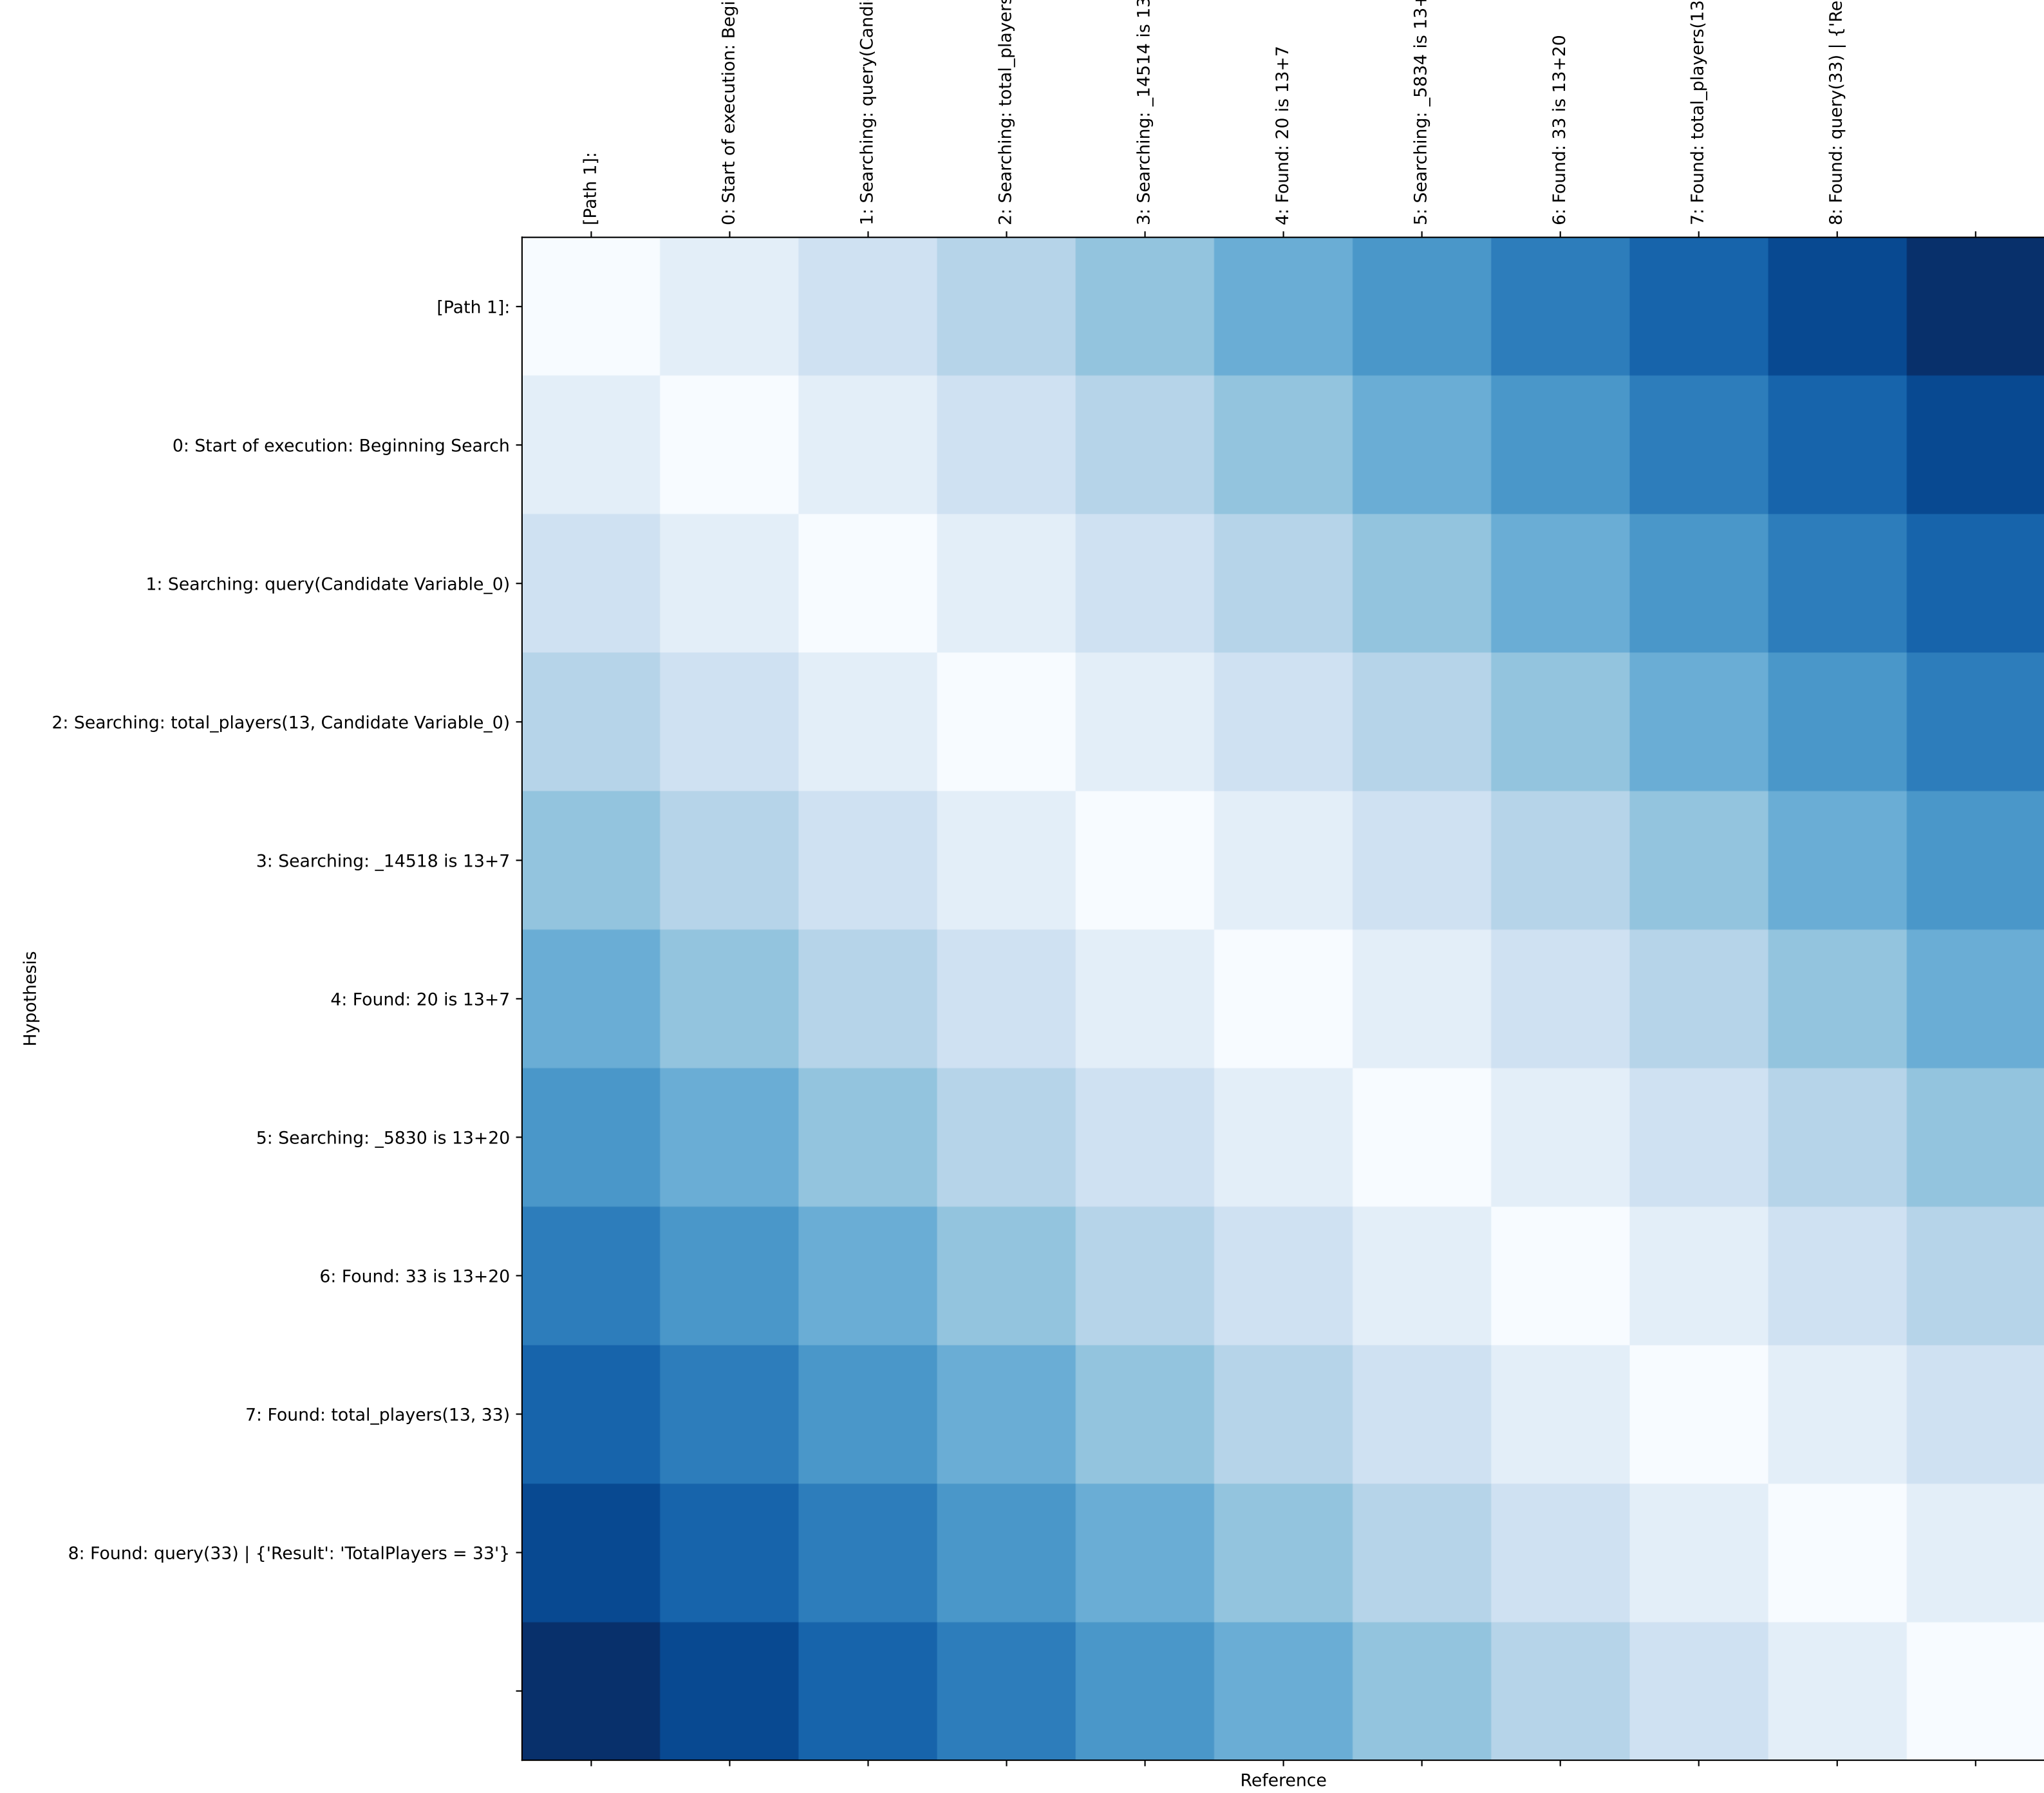

Supplement: supplementary_material [file attachment]

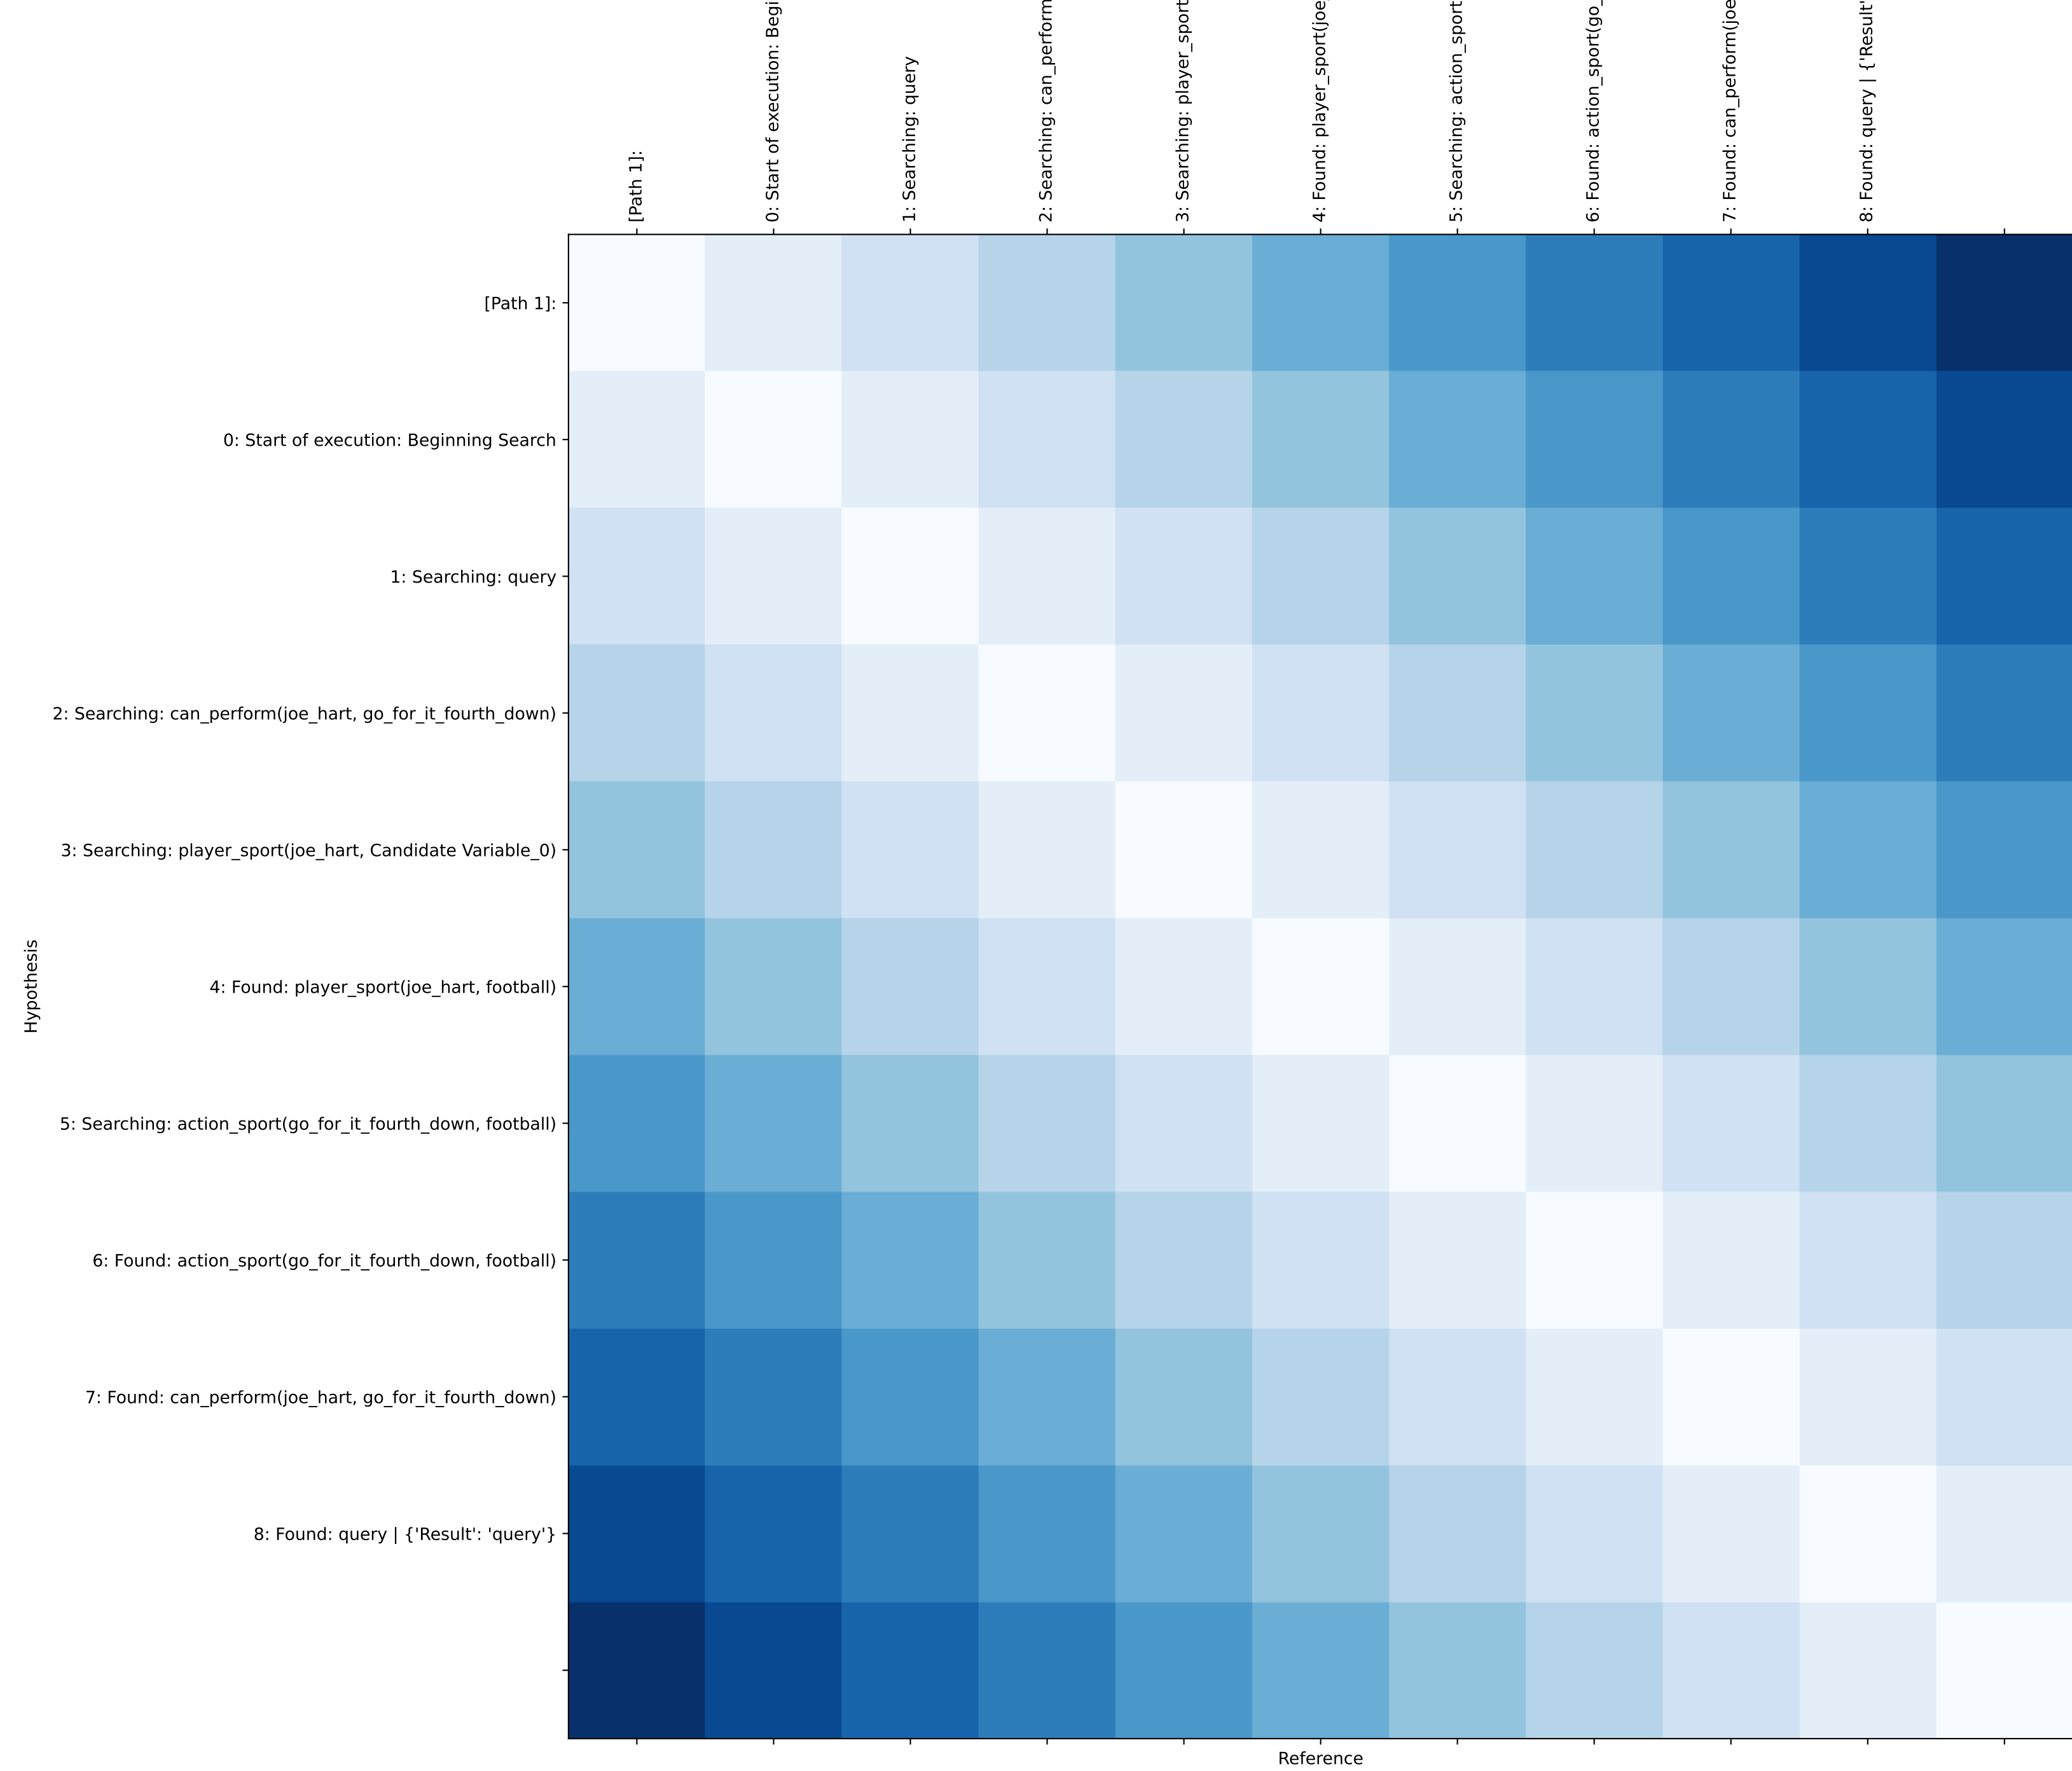

Supplement: supplementary_material [file attachment]

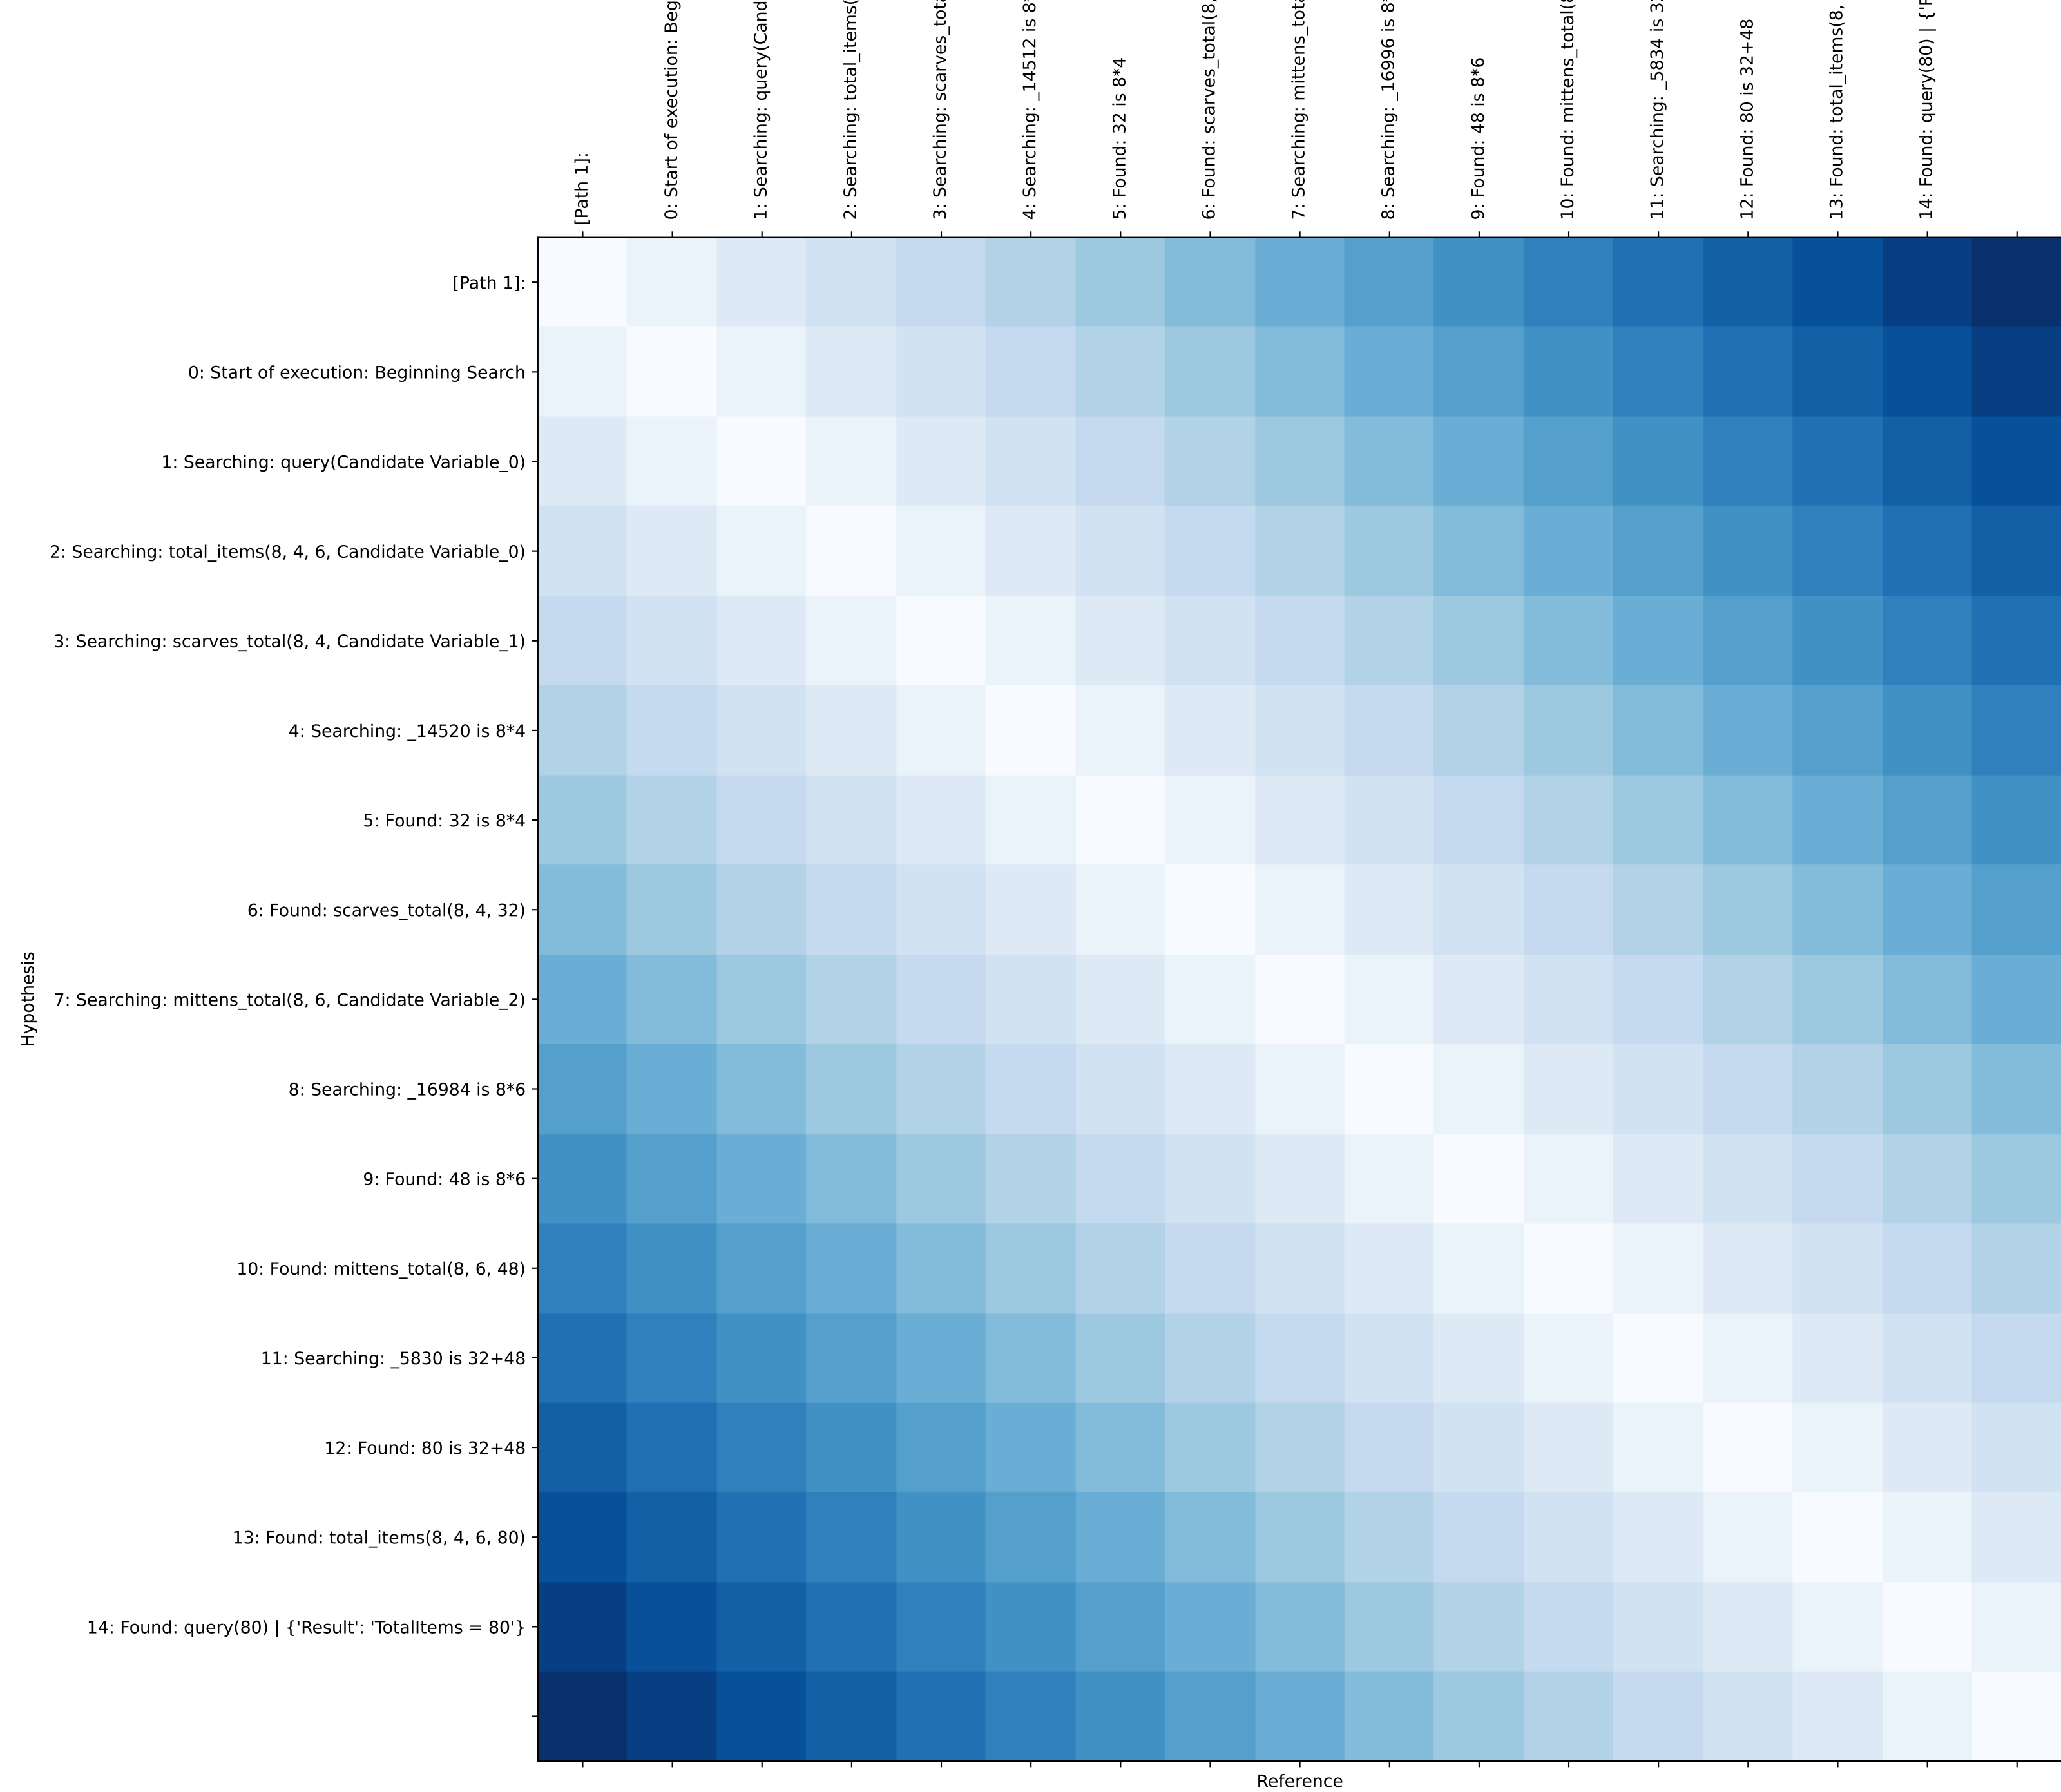

Supplement: supplementary_material [file attachment]

Hypothesis

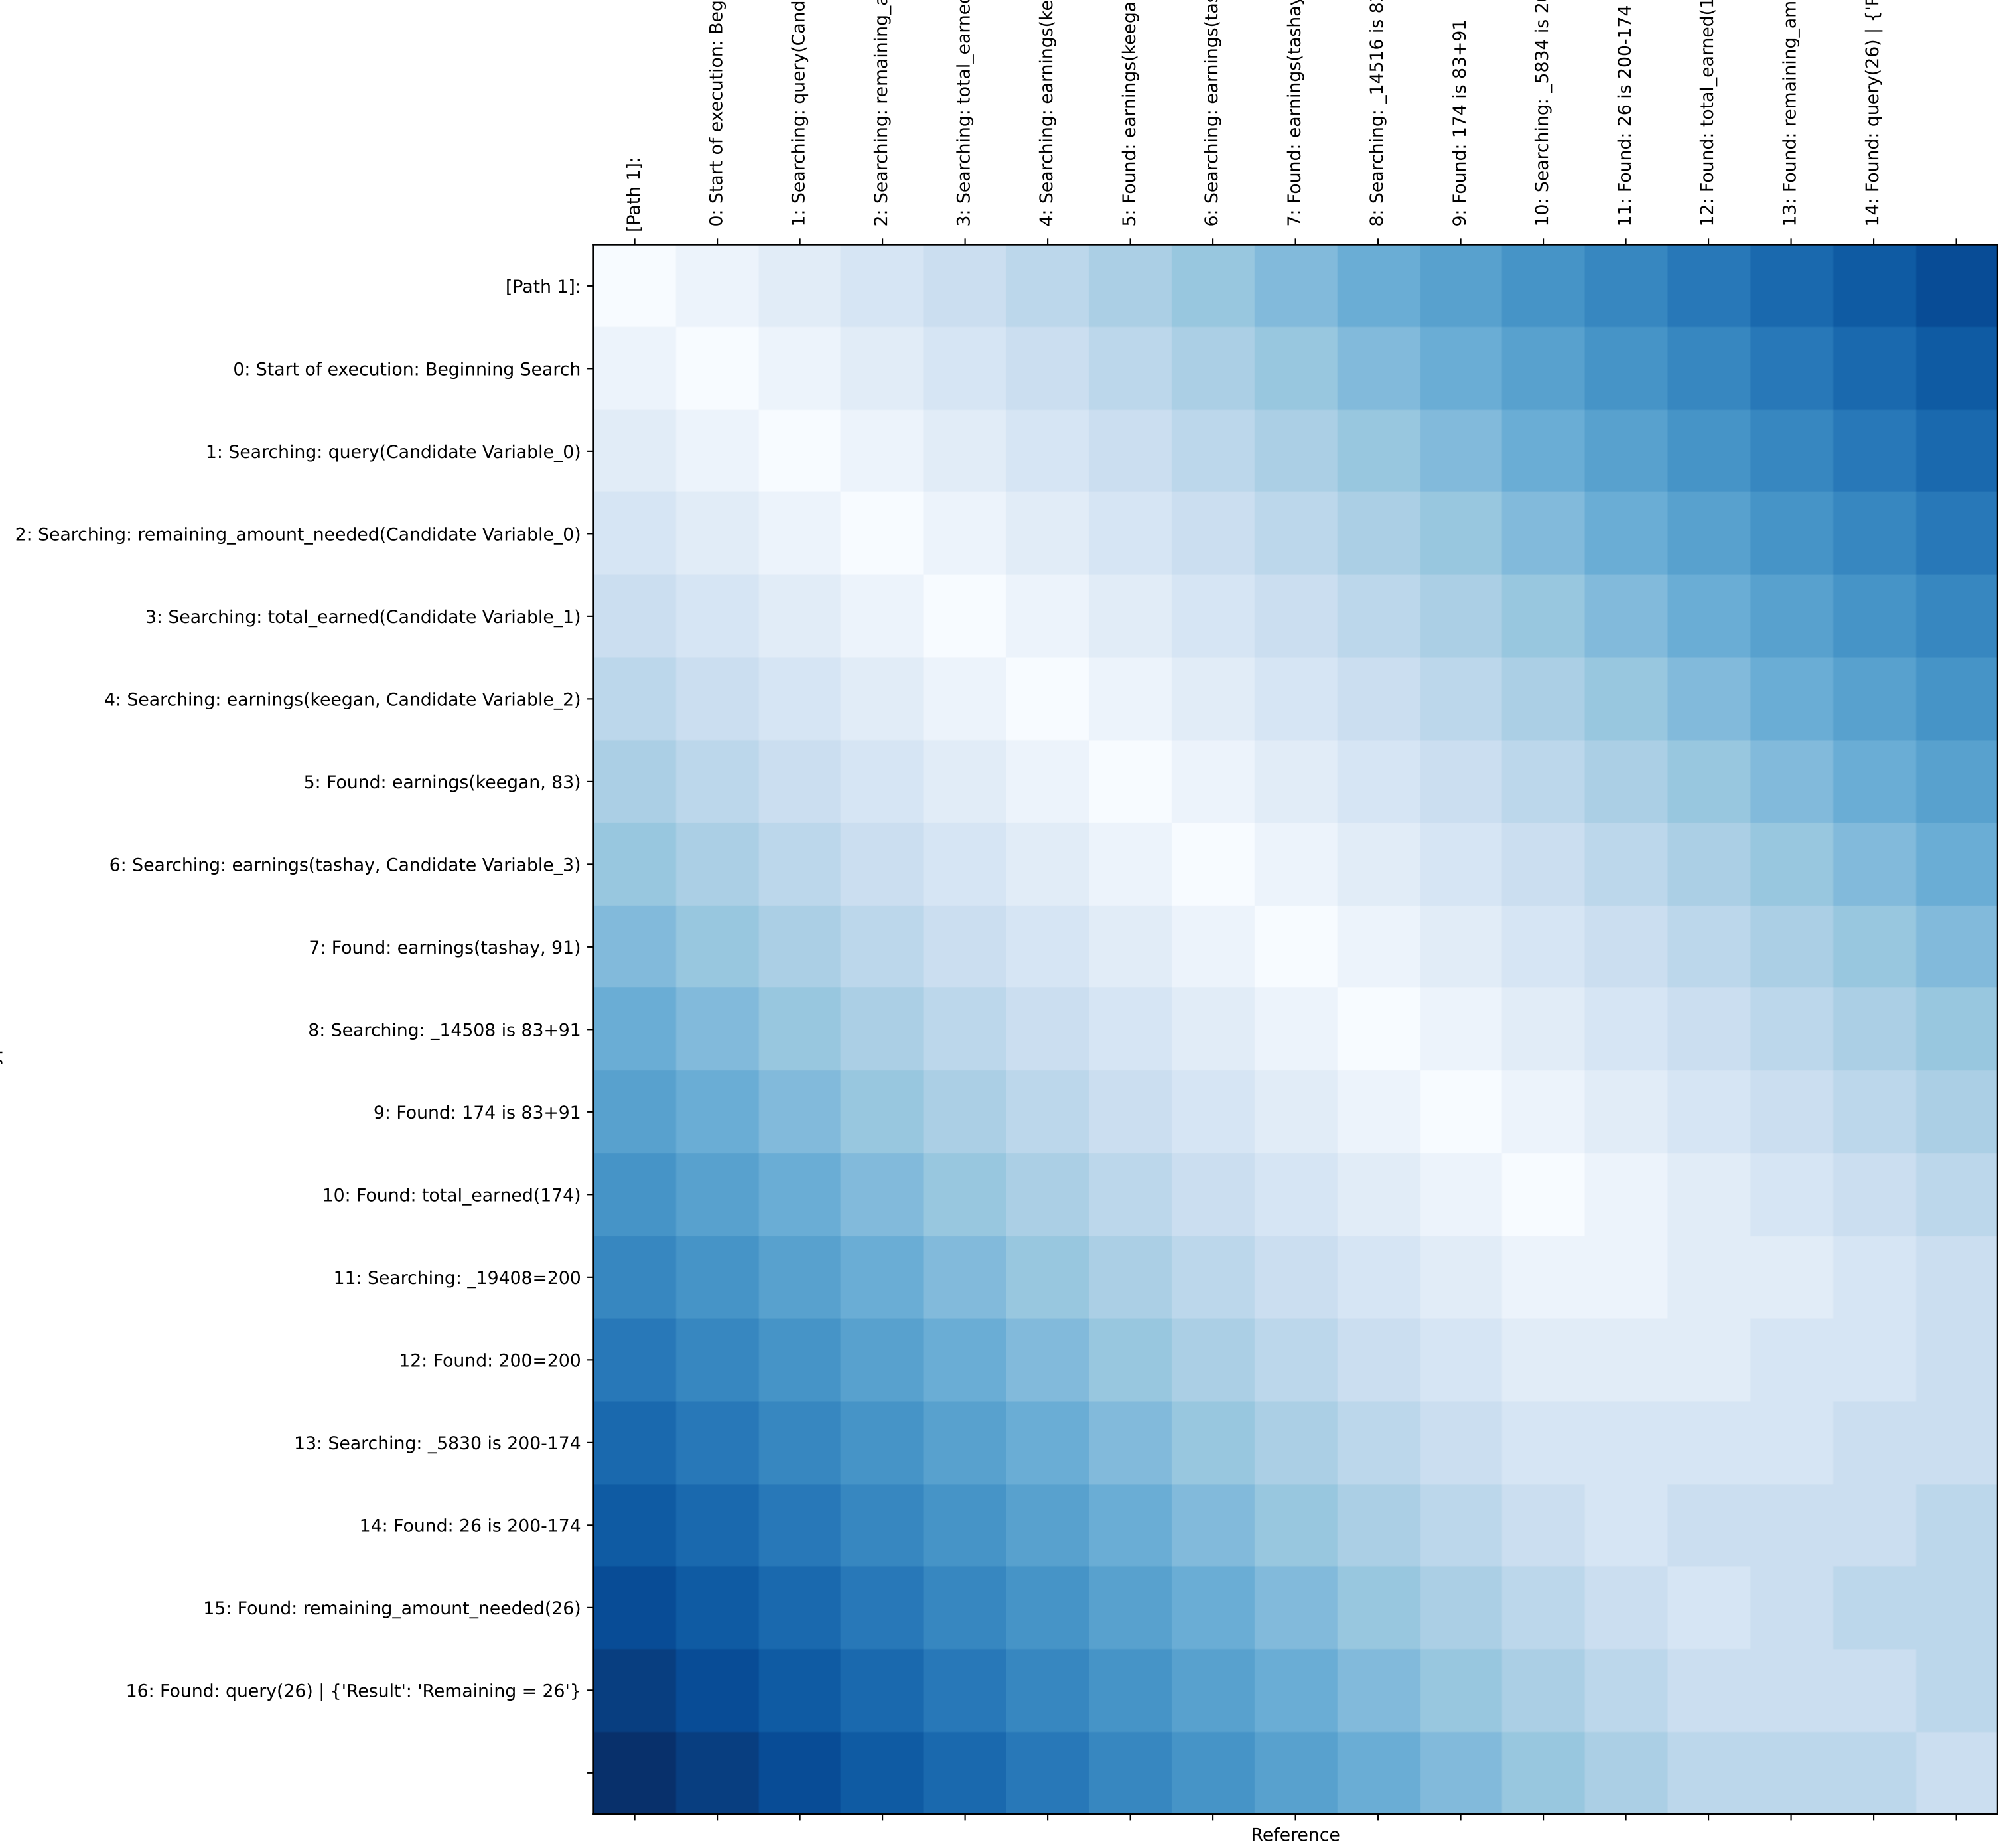

Supplement: supplementary_material [file attachment]

Hypothesis

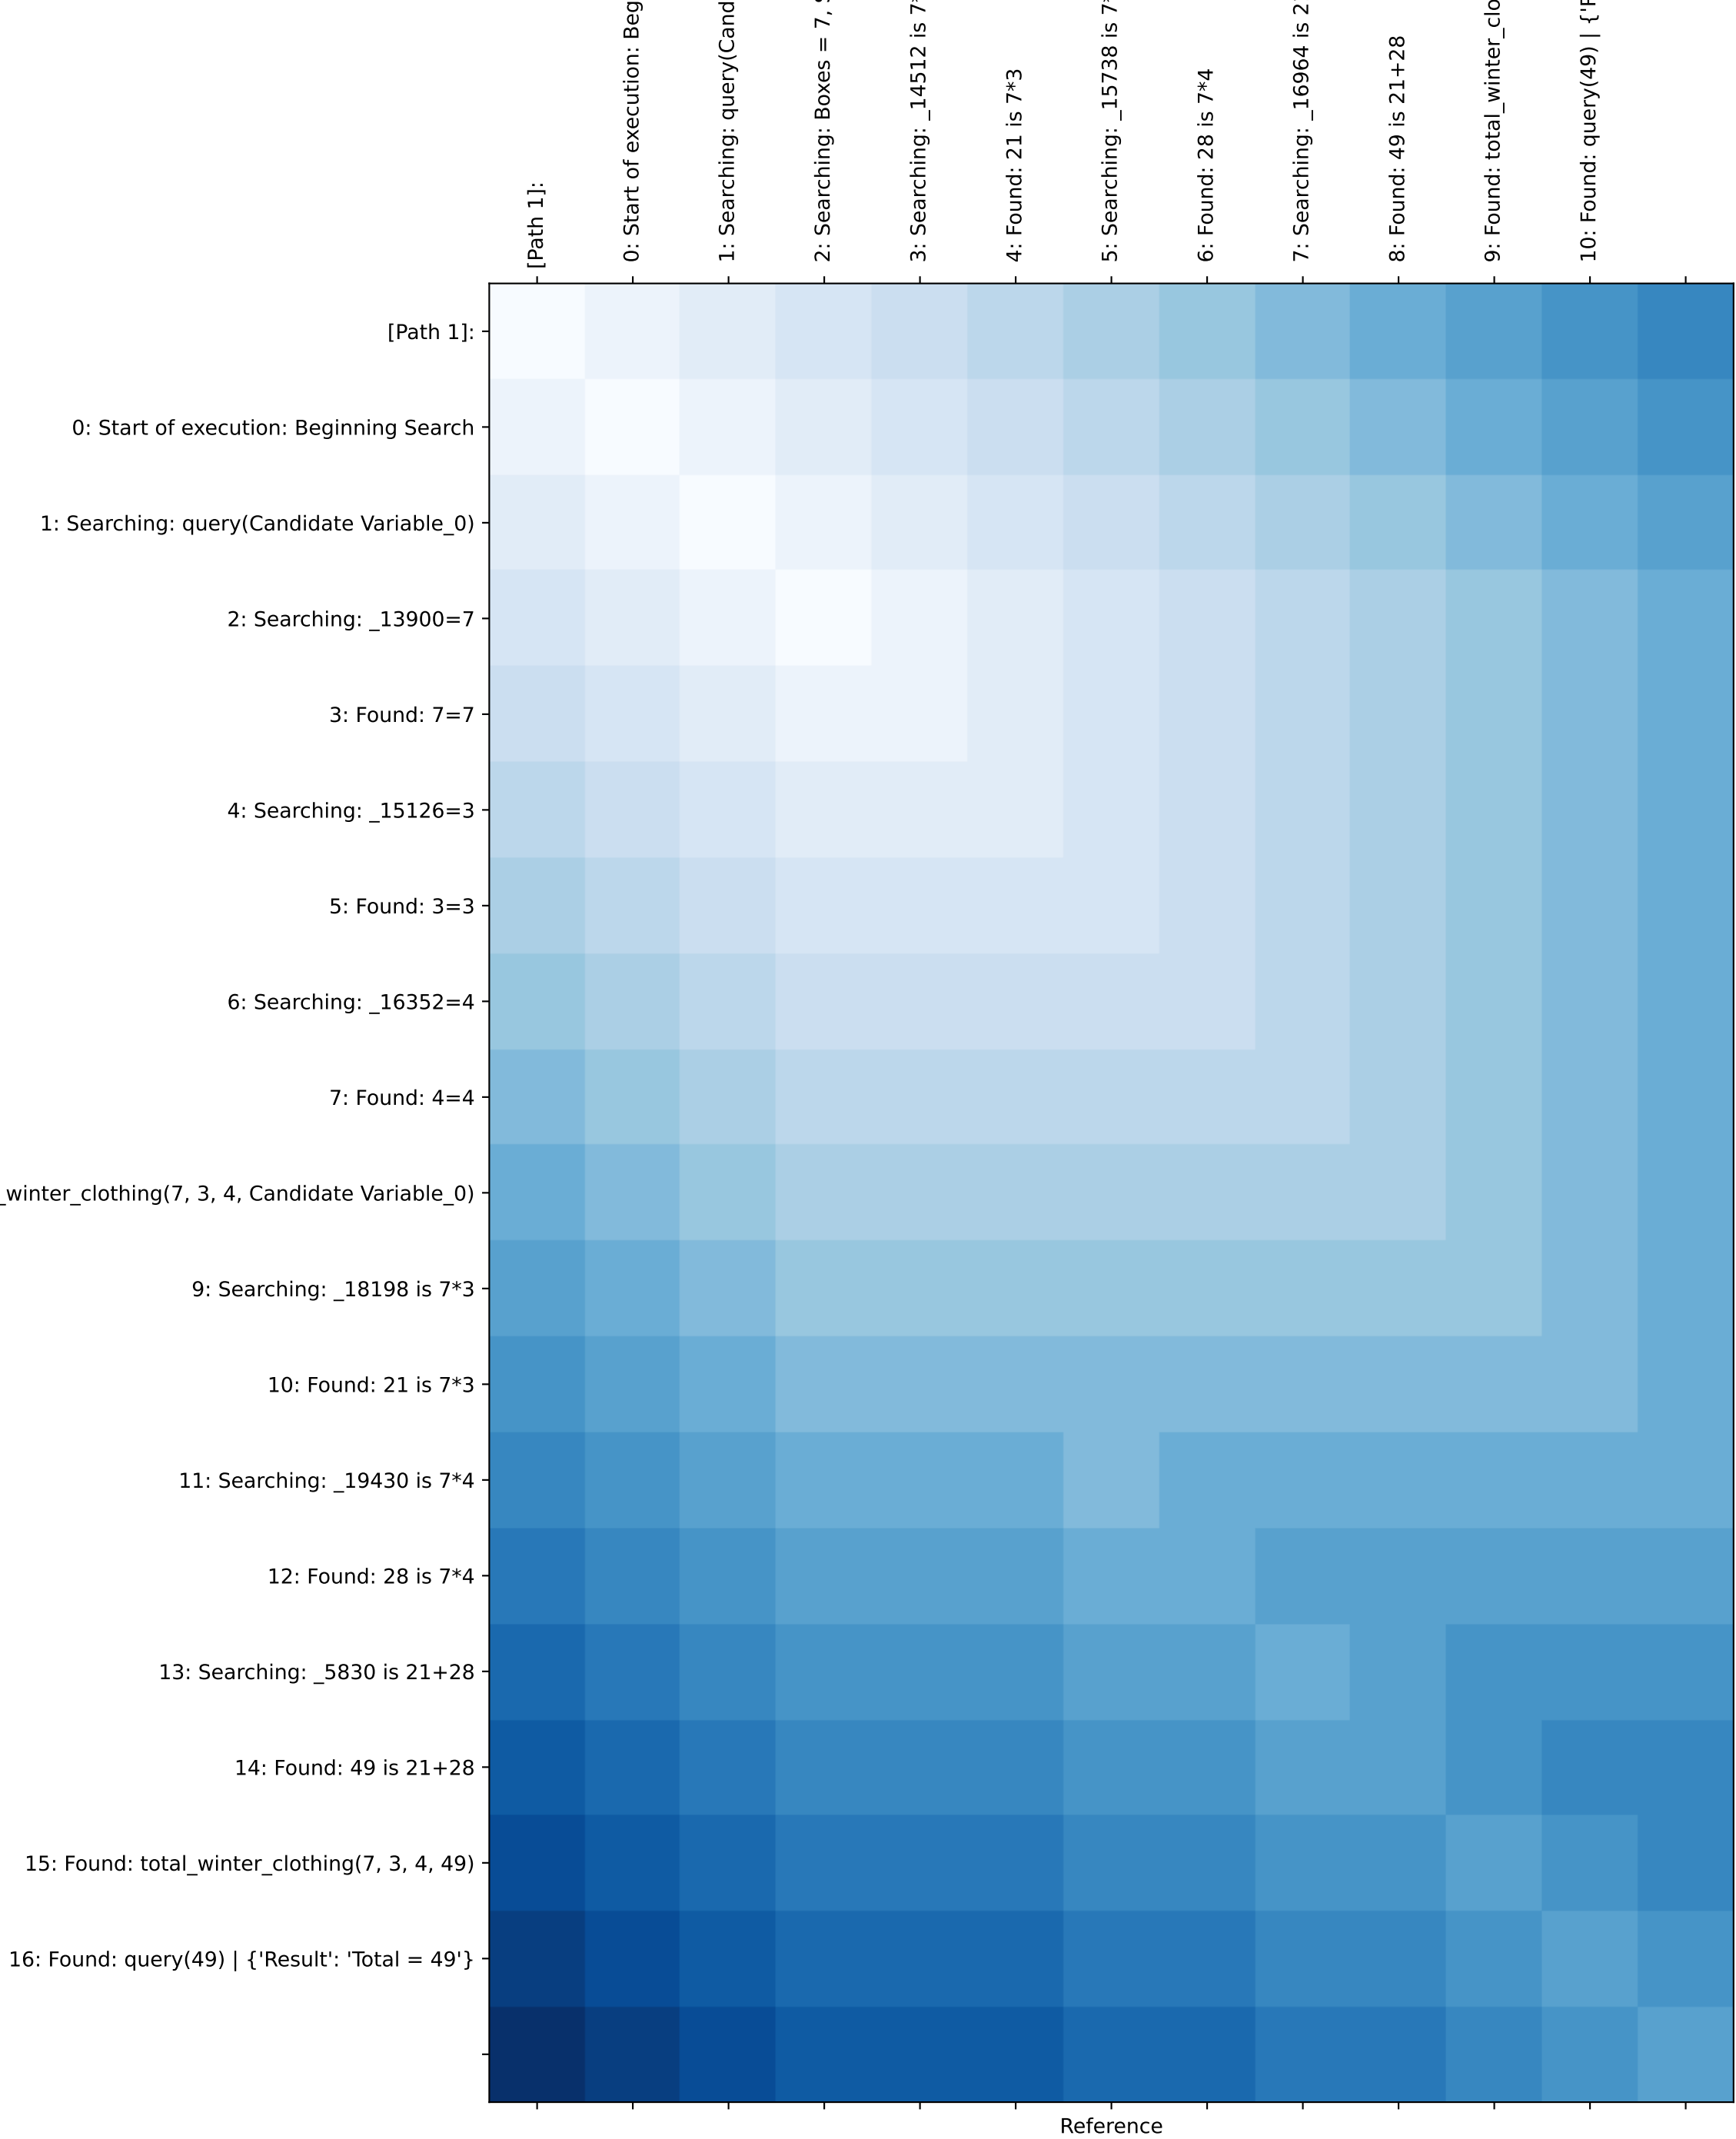

Reference

Supplement: supplementary_material [file attachment]

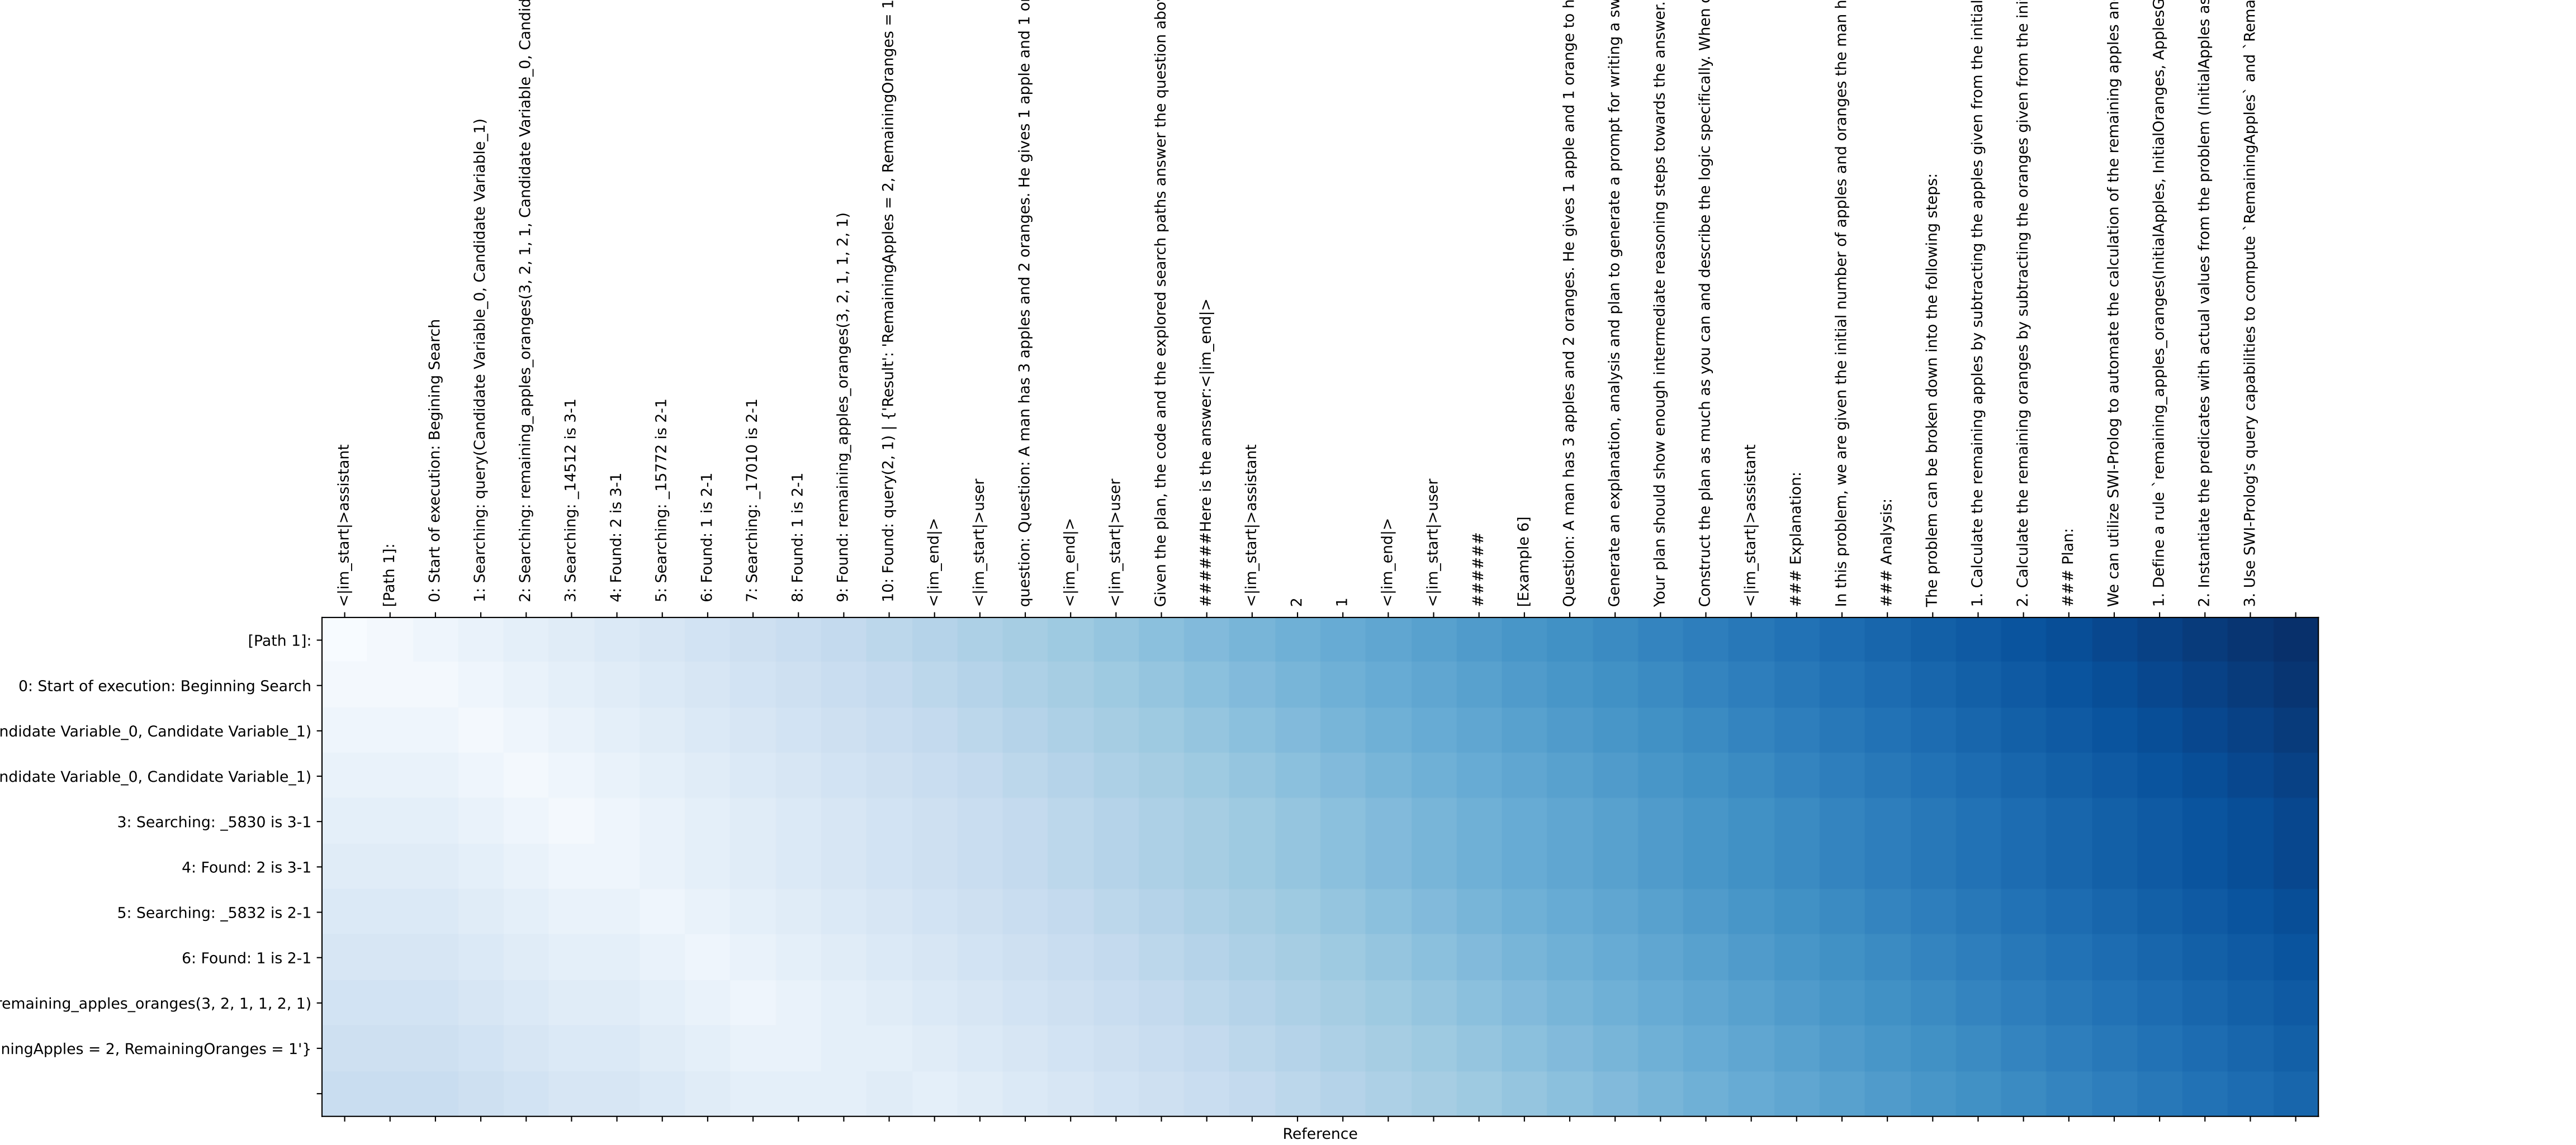

Supplement: supplementary_material [file attachment]

Hypothesis

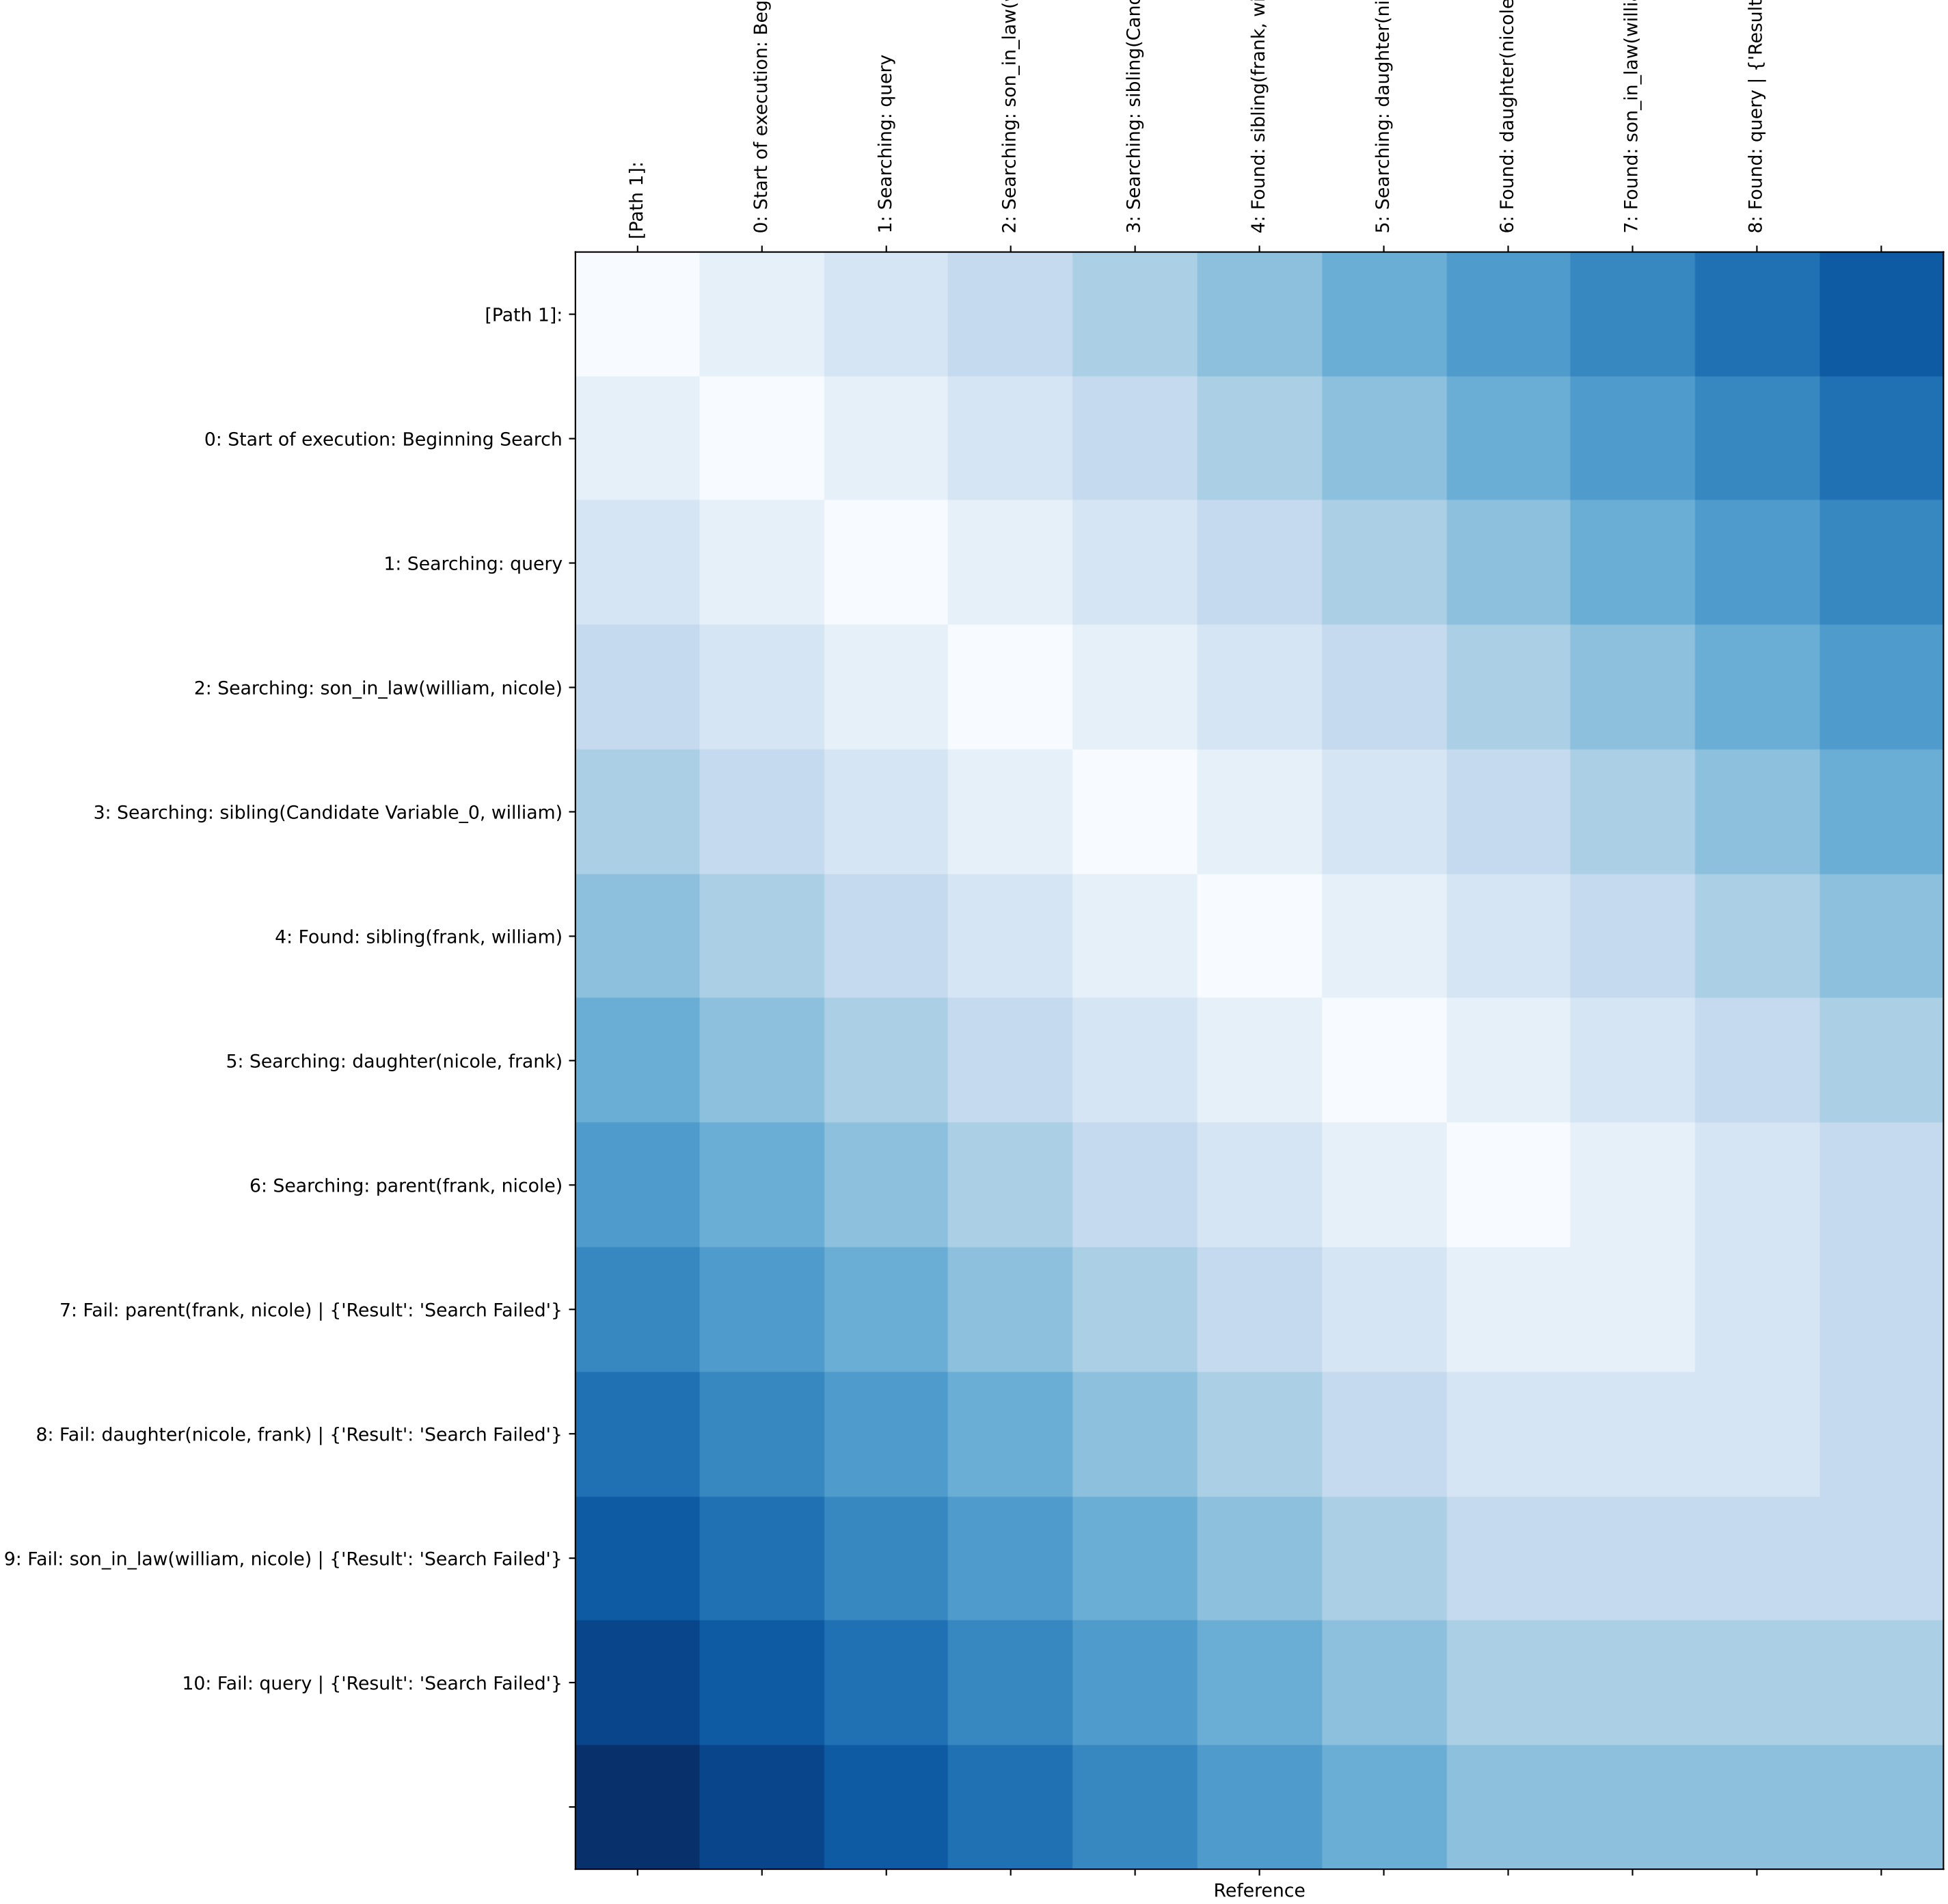

Reference

Supplement: supplementary_material [file attachment]

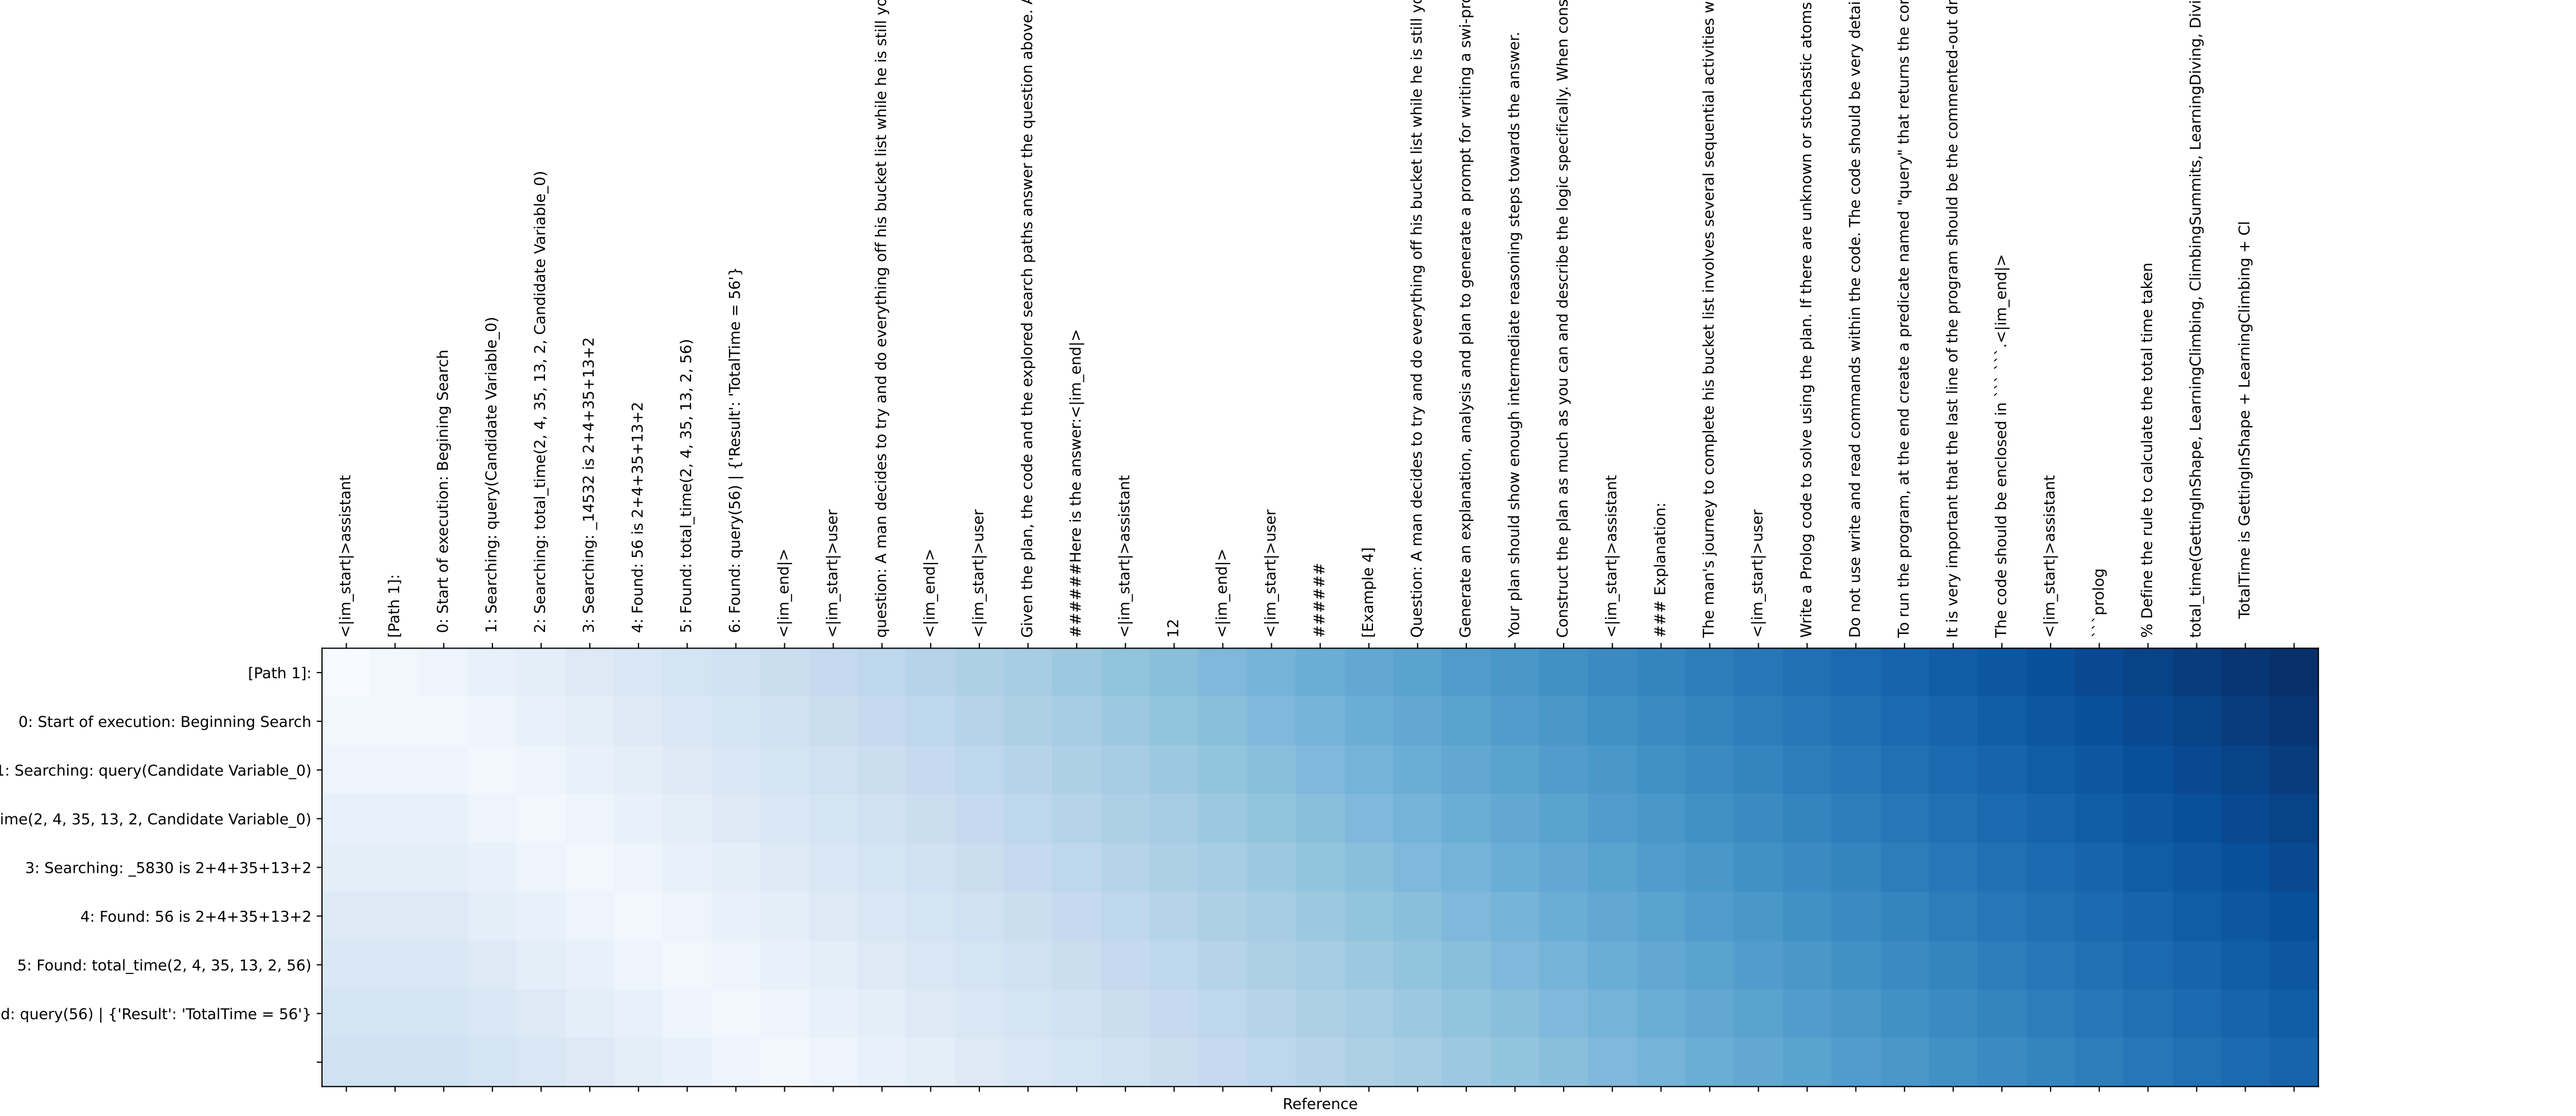

Supplement: supplementary_material [file attachment]

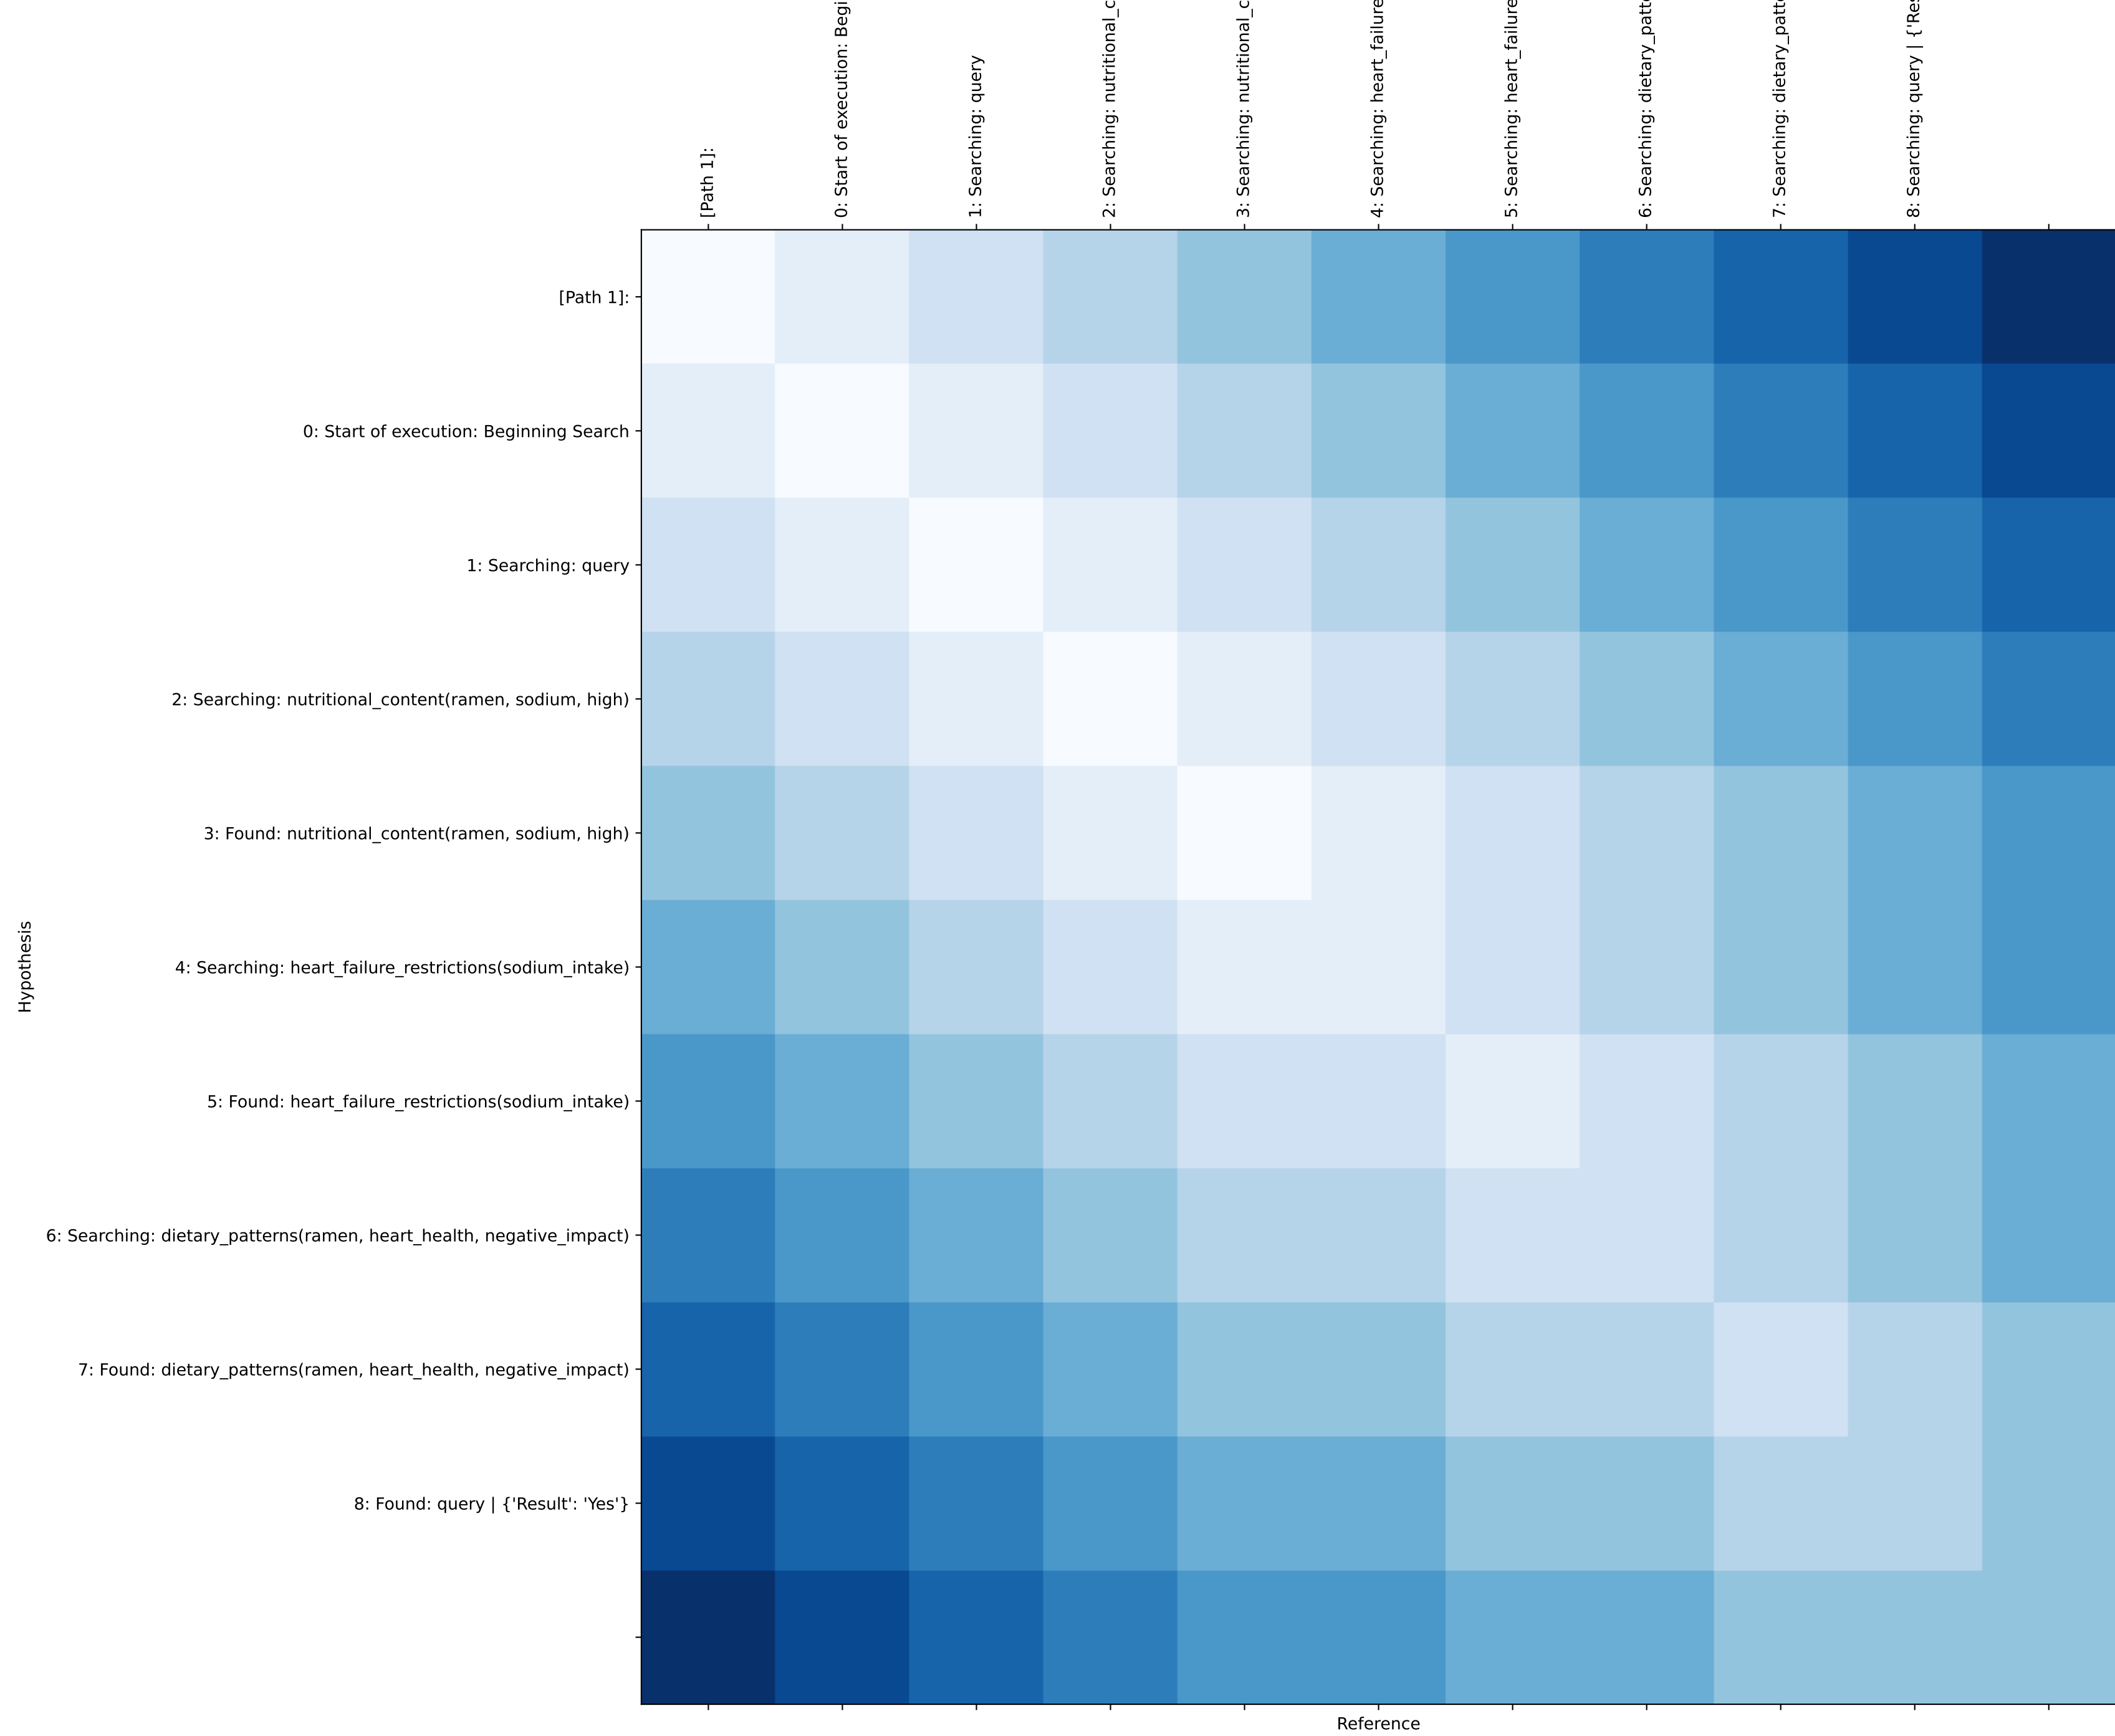

Supplement: supplementary_material [file attachment]

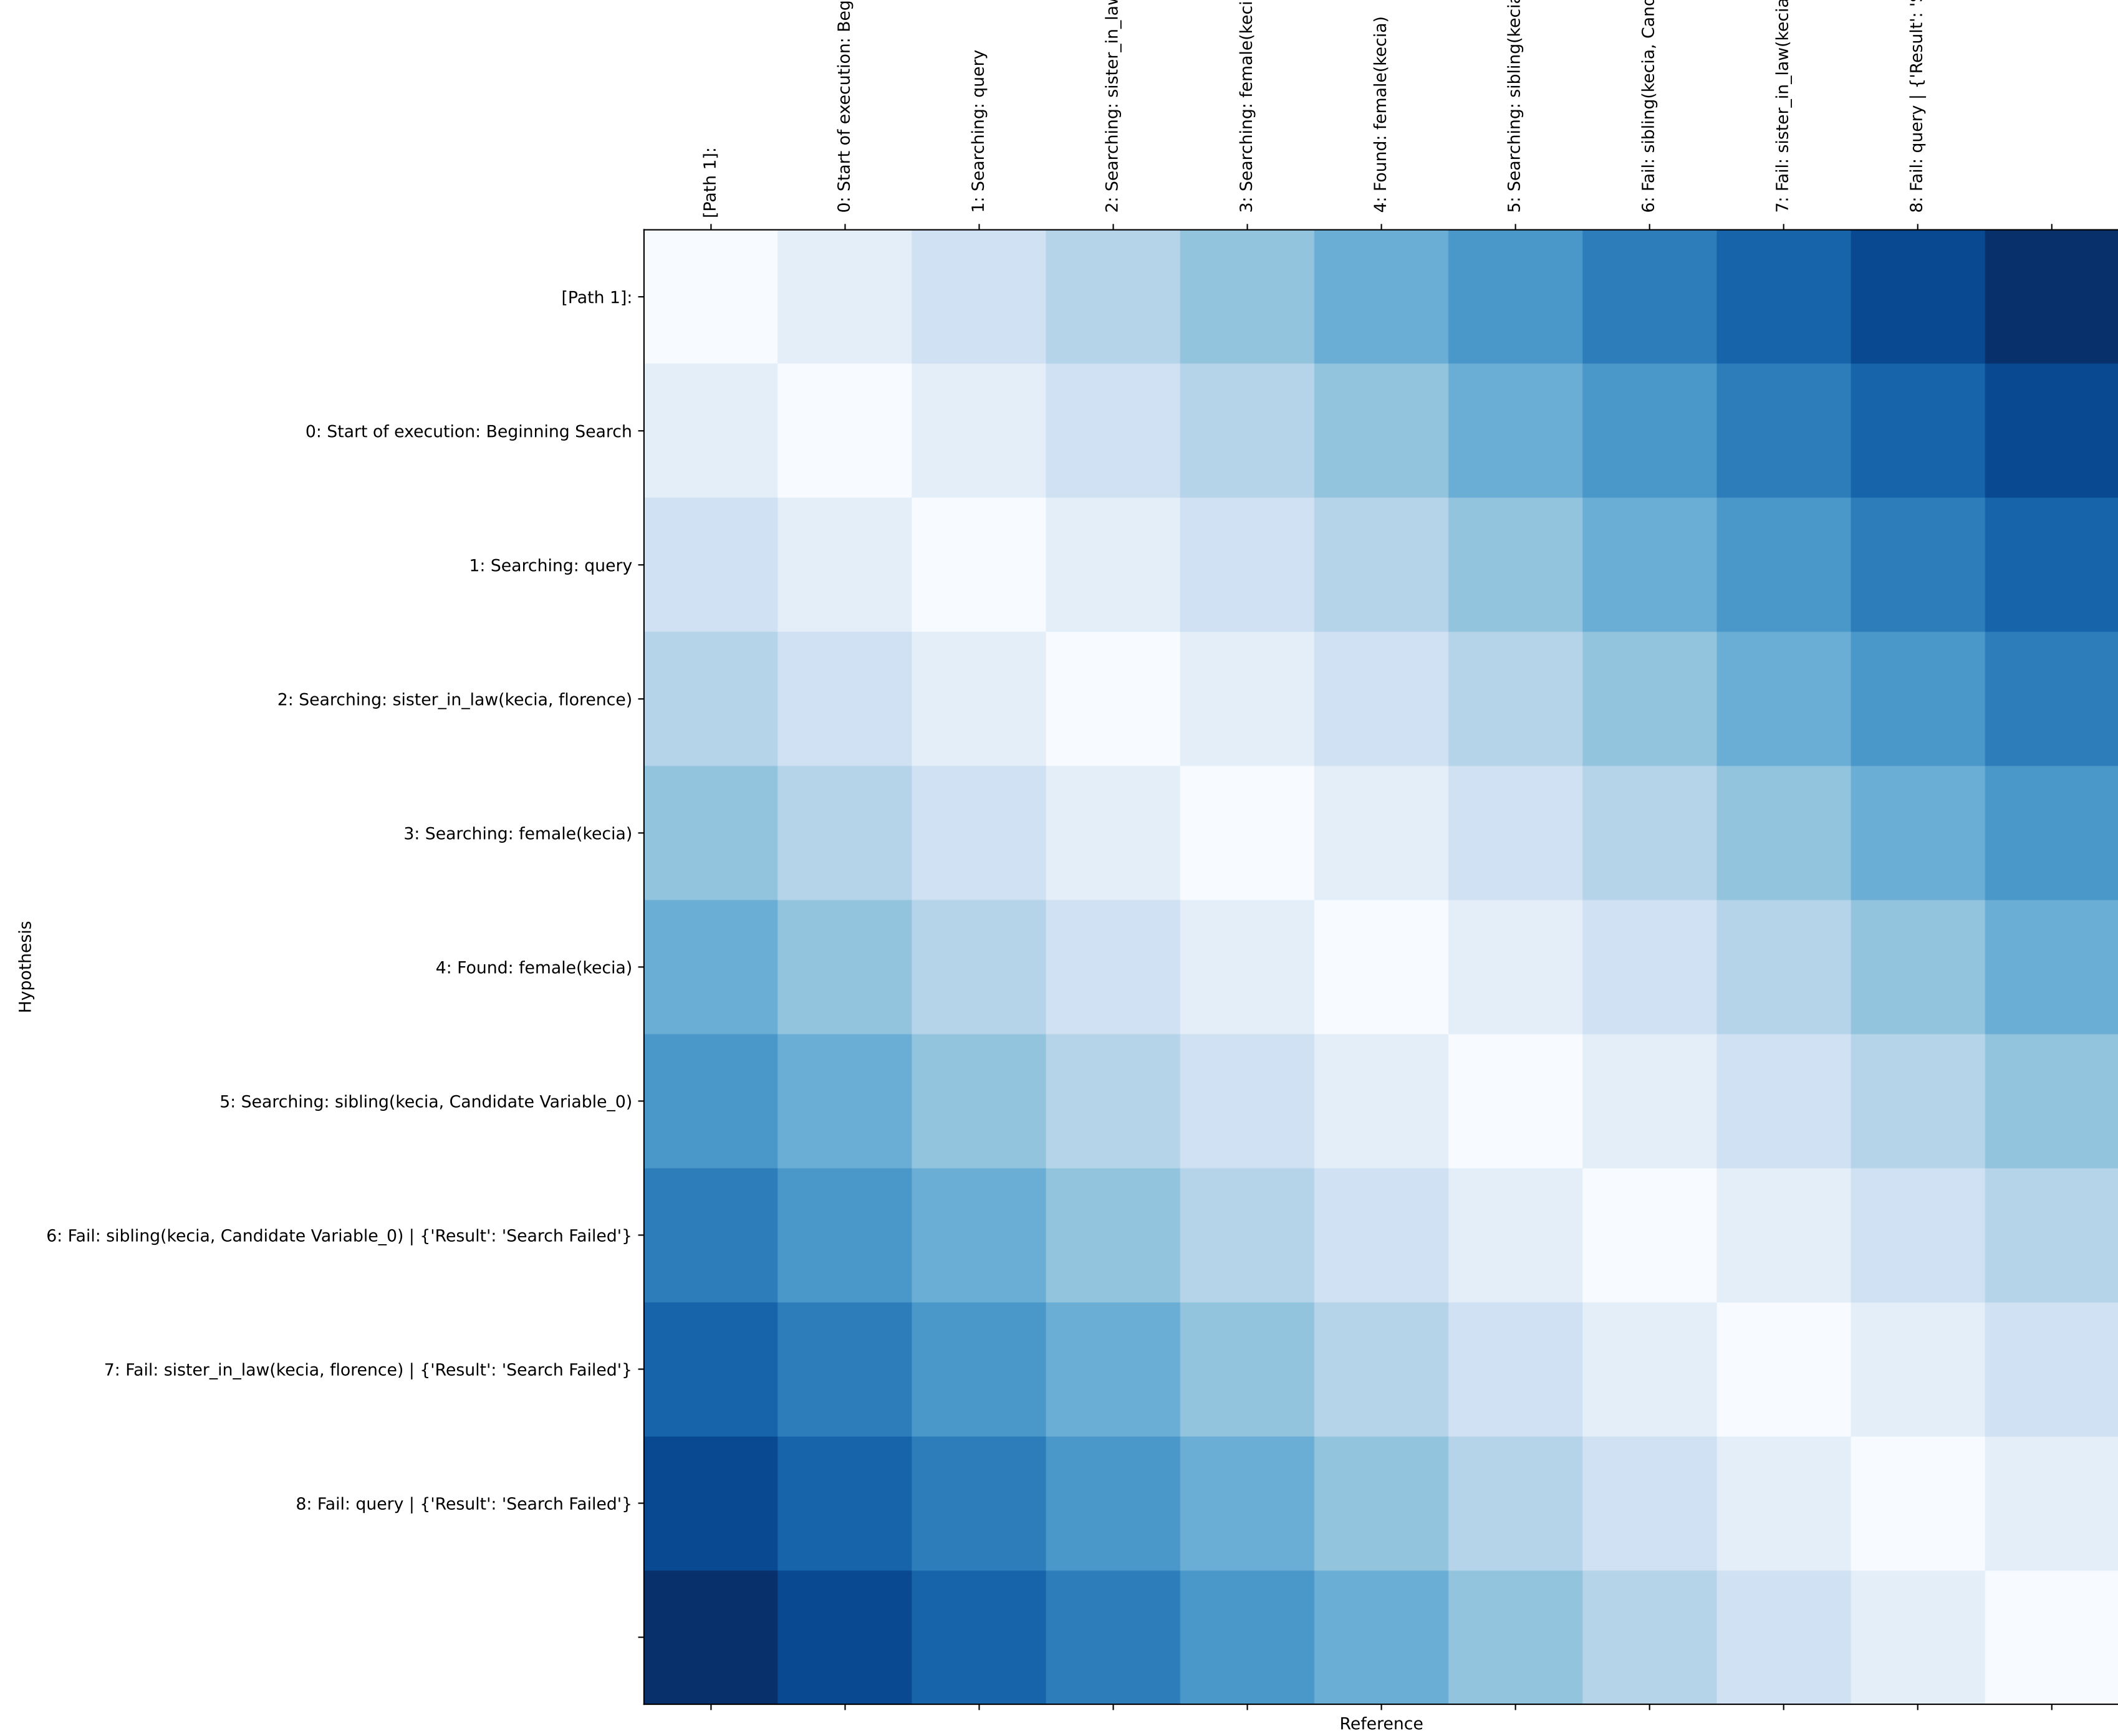

Supplement: supplementary_material [file attachment]

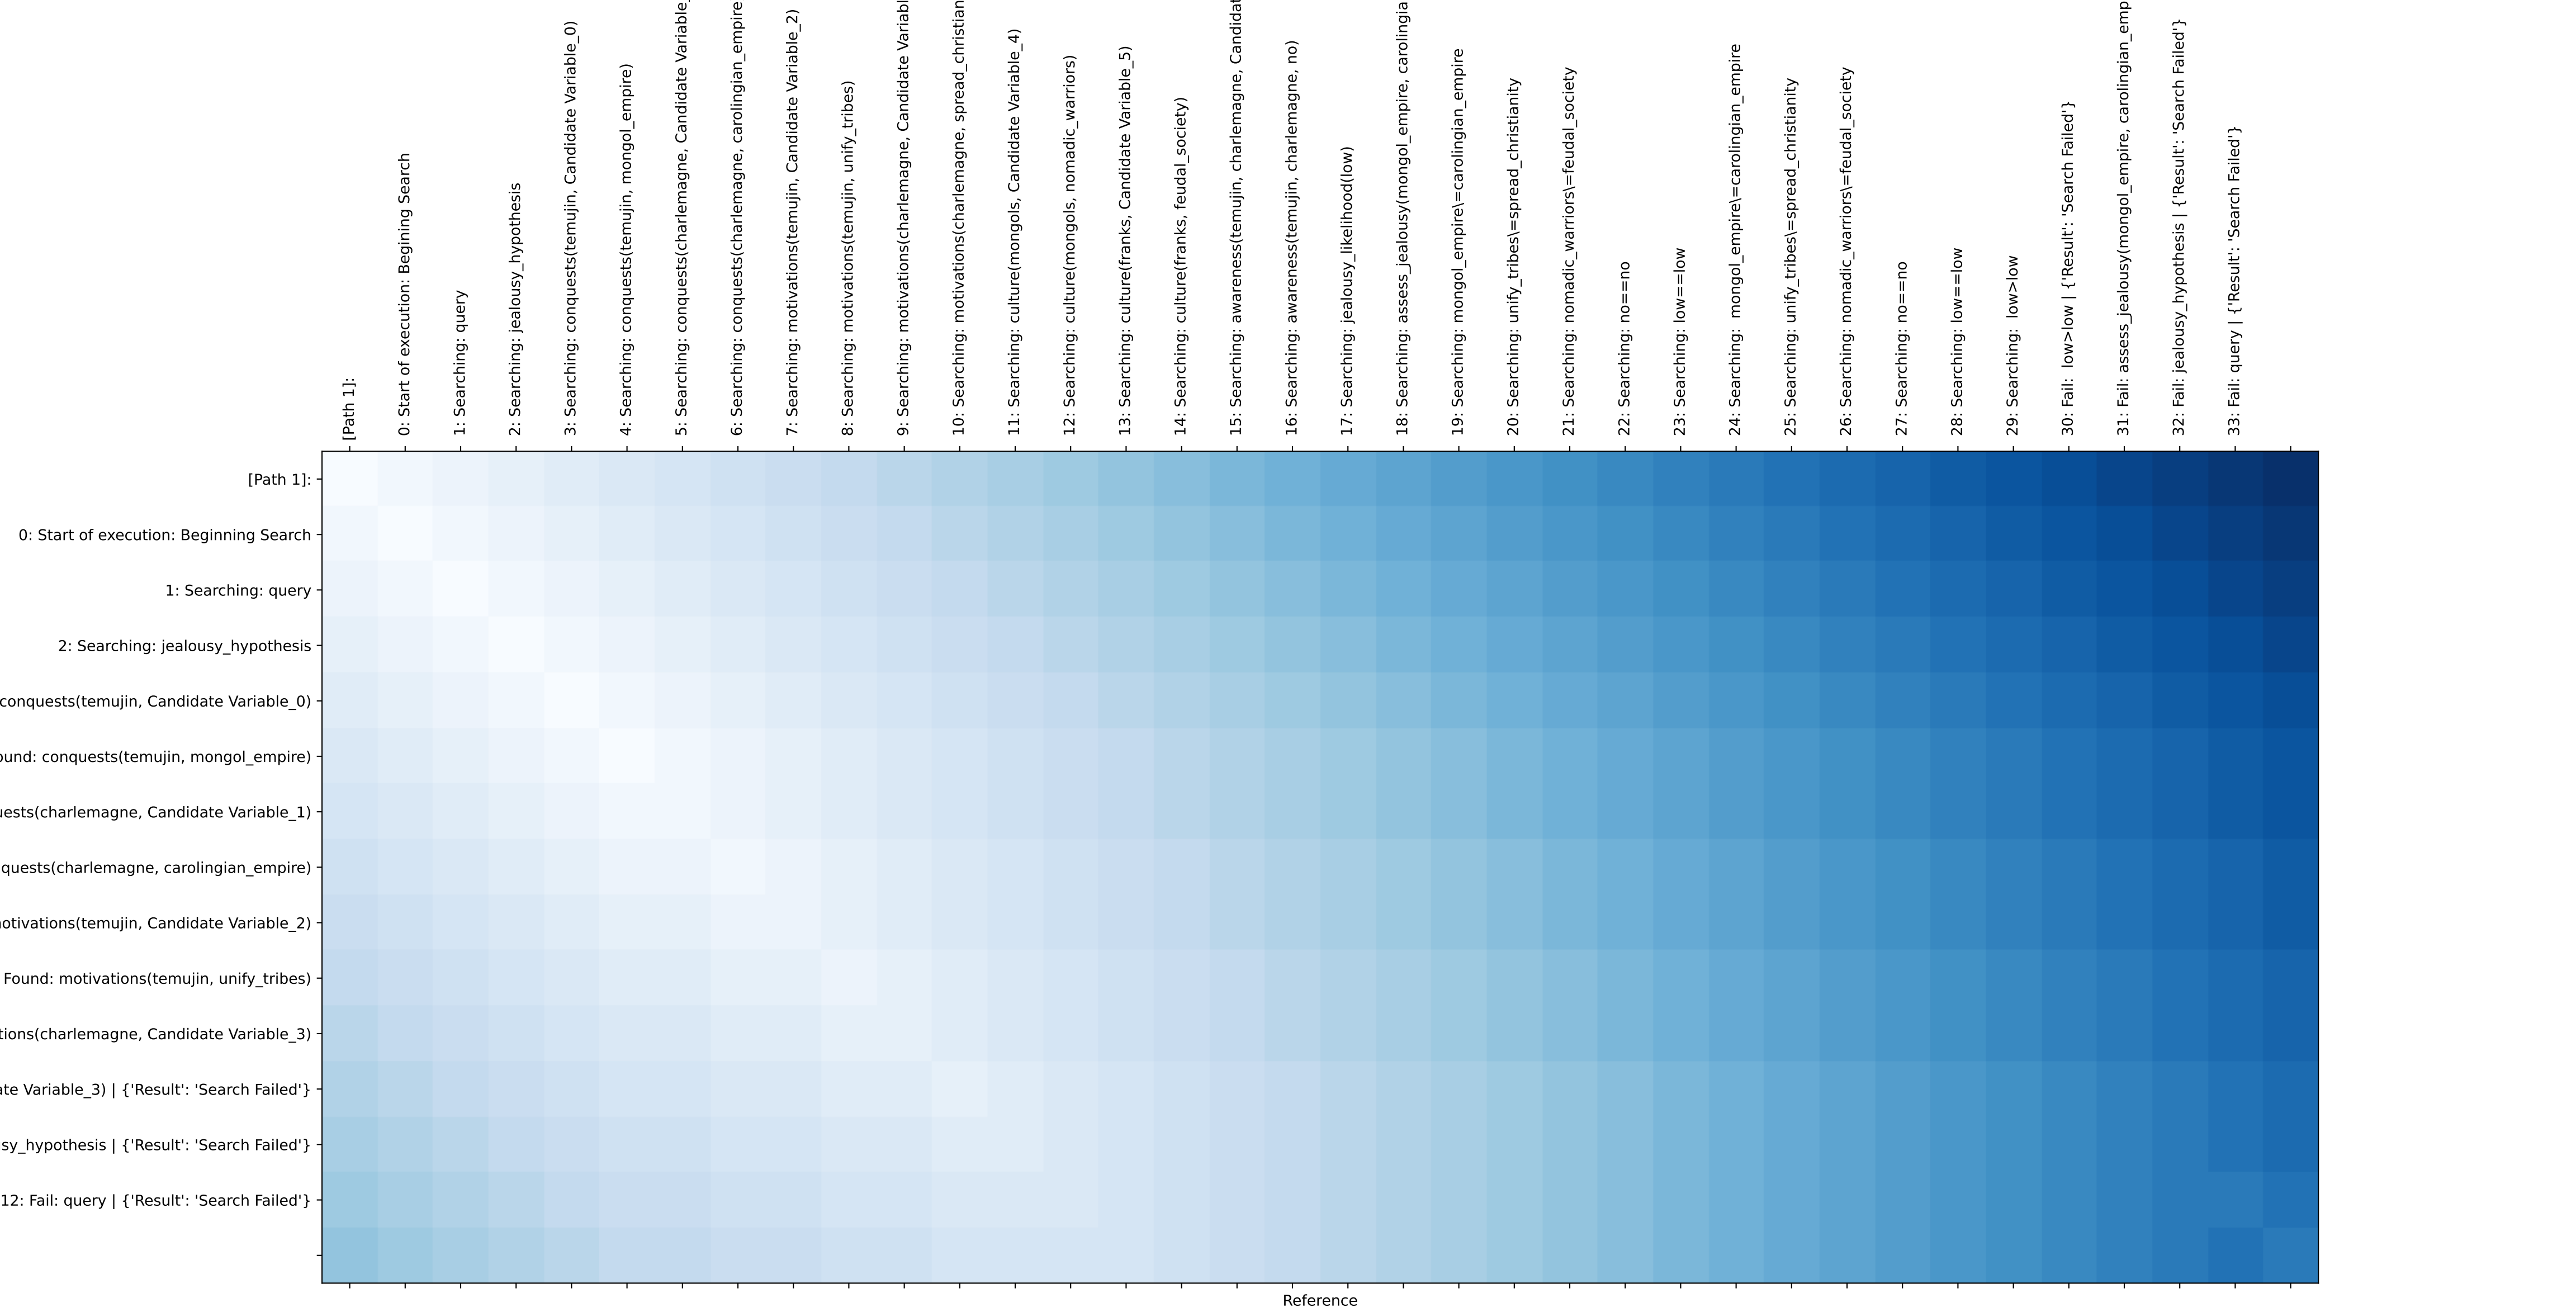

Supplement: supplementary_material [file attachment]

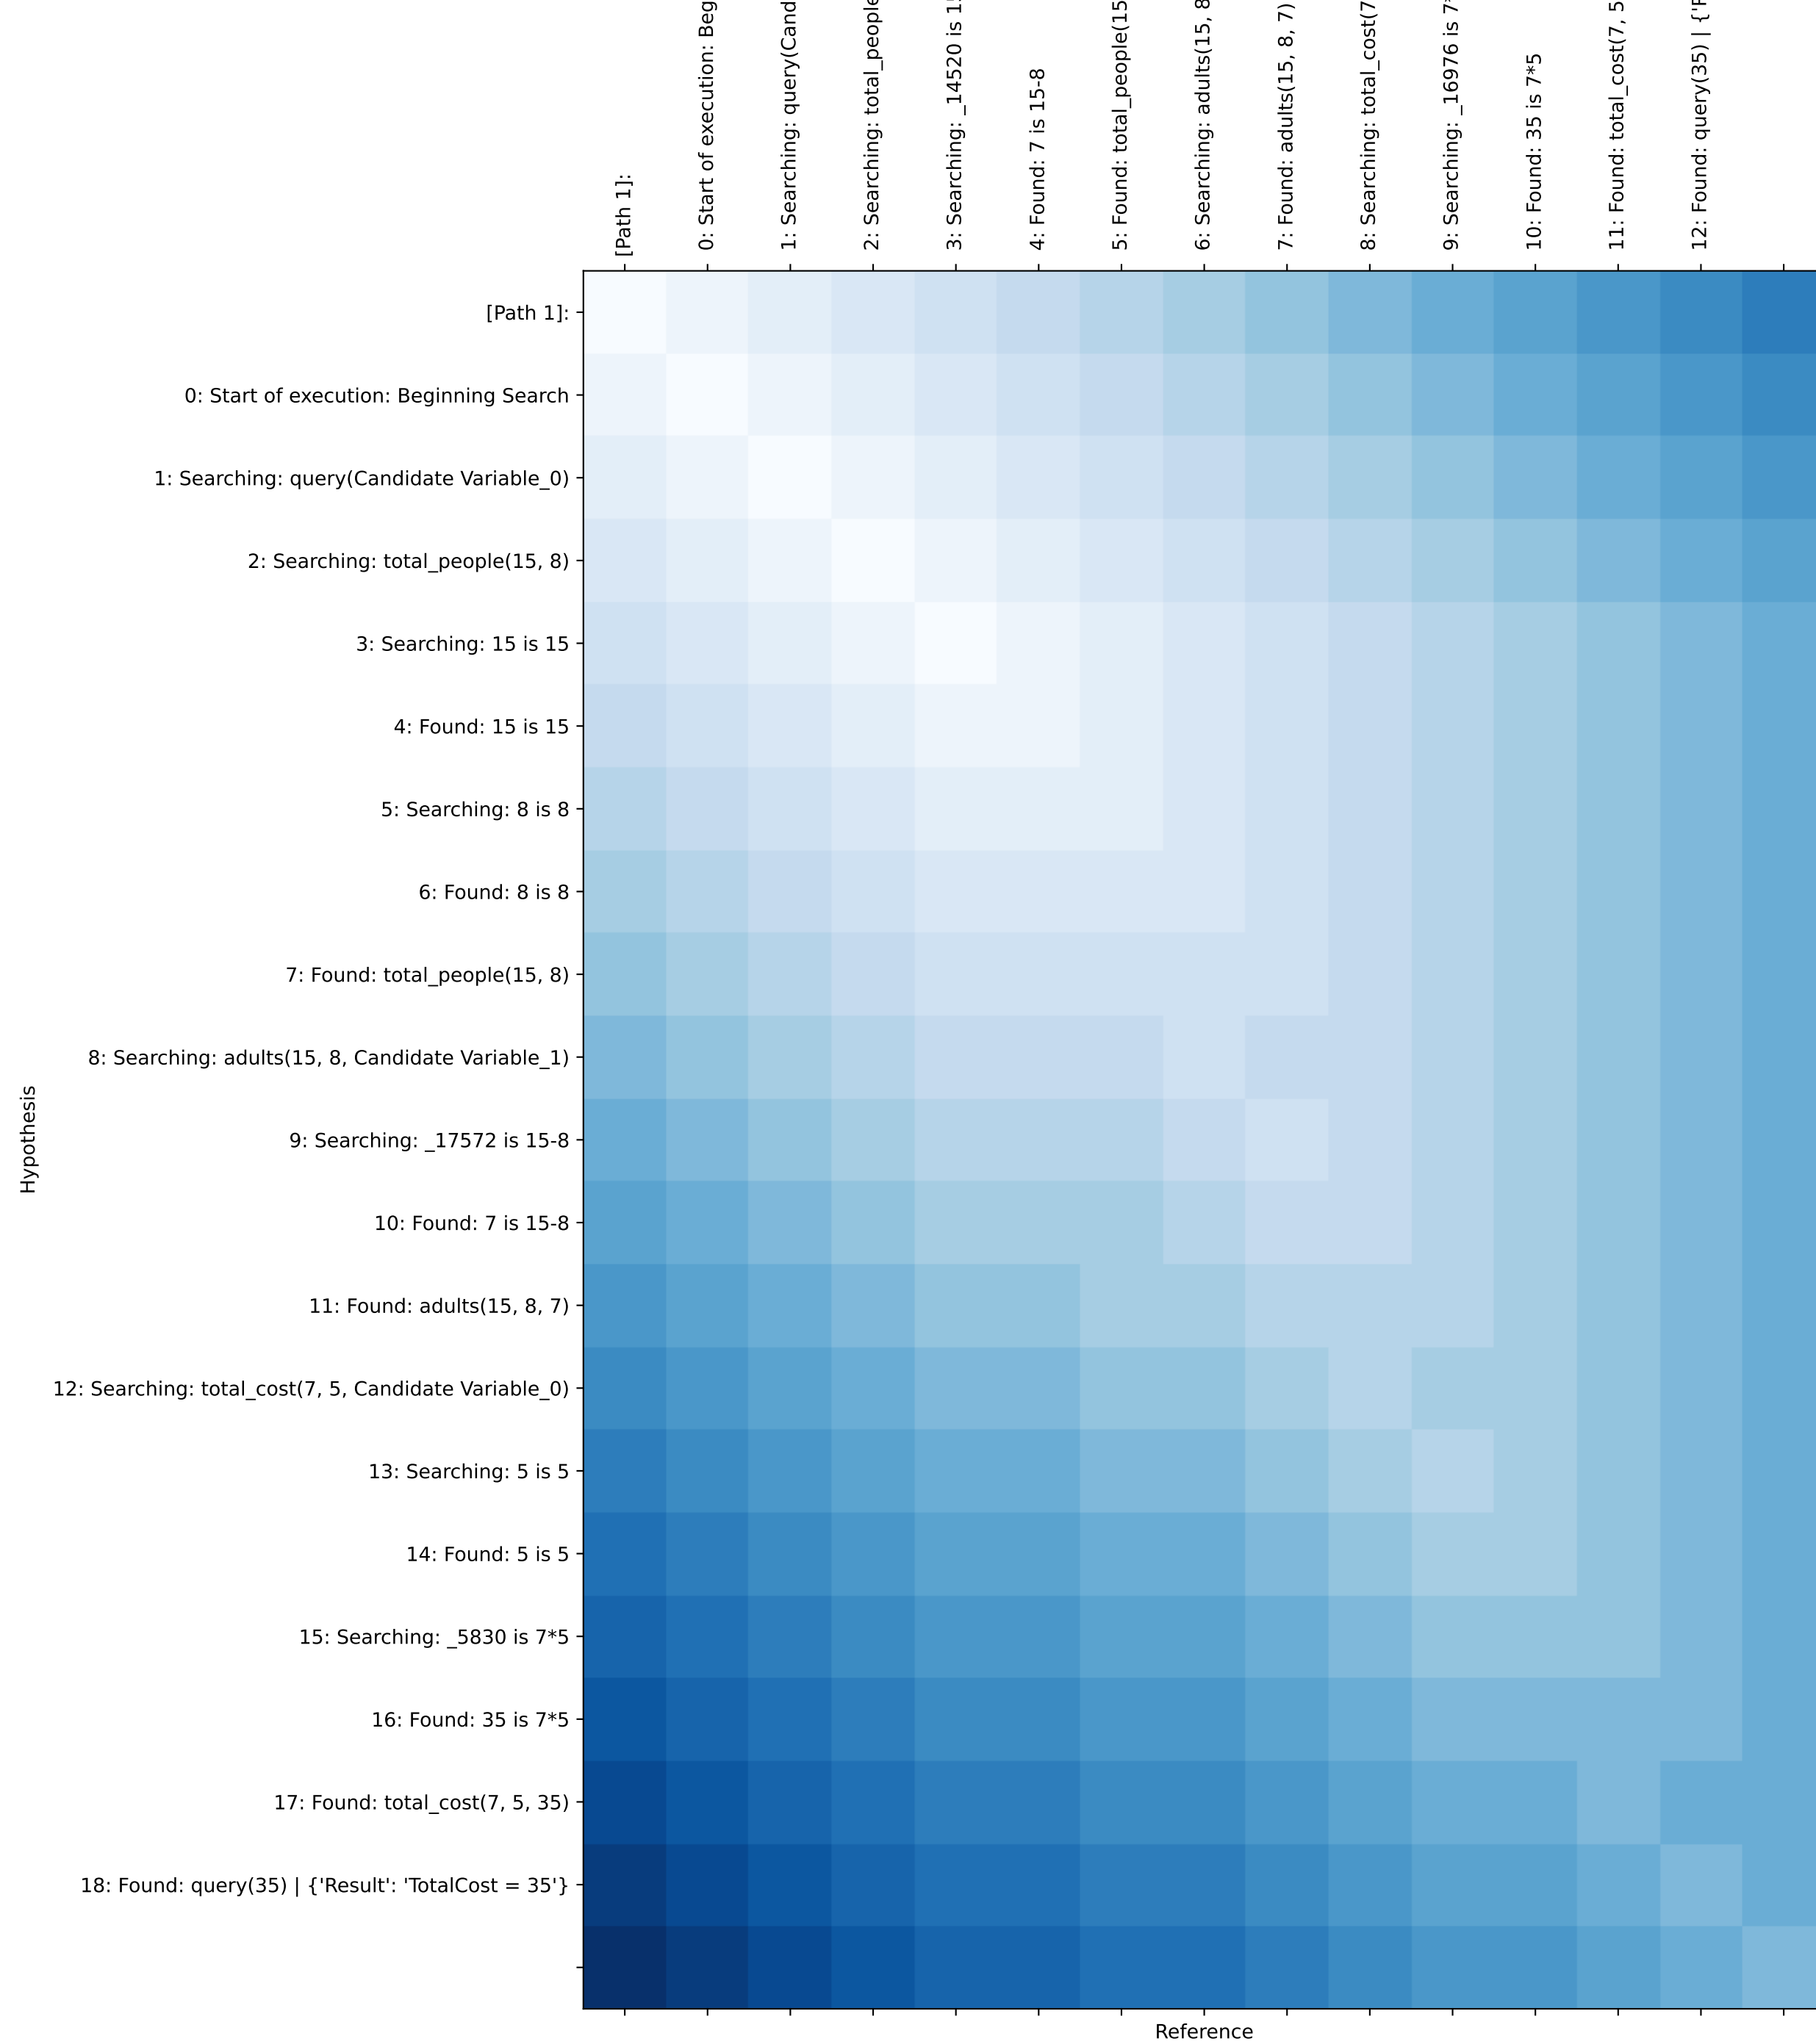

Supplement: supplementary_material [file attachment]

Hypothesis

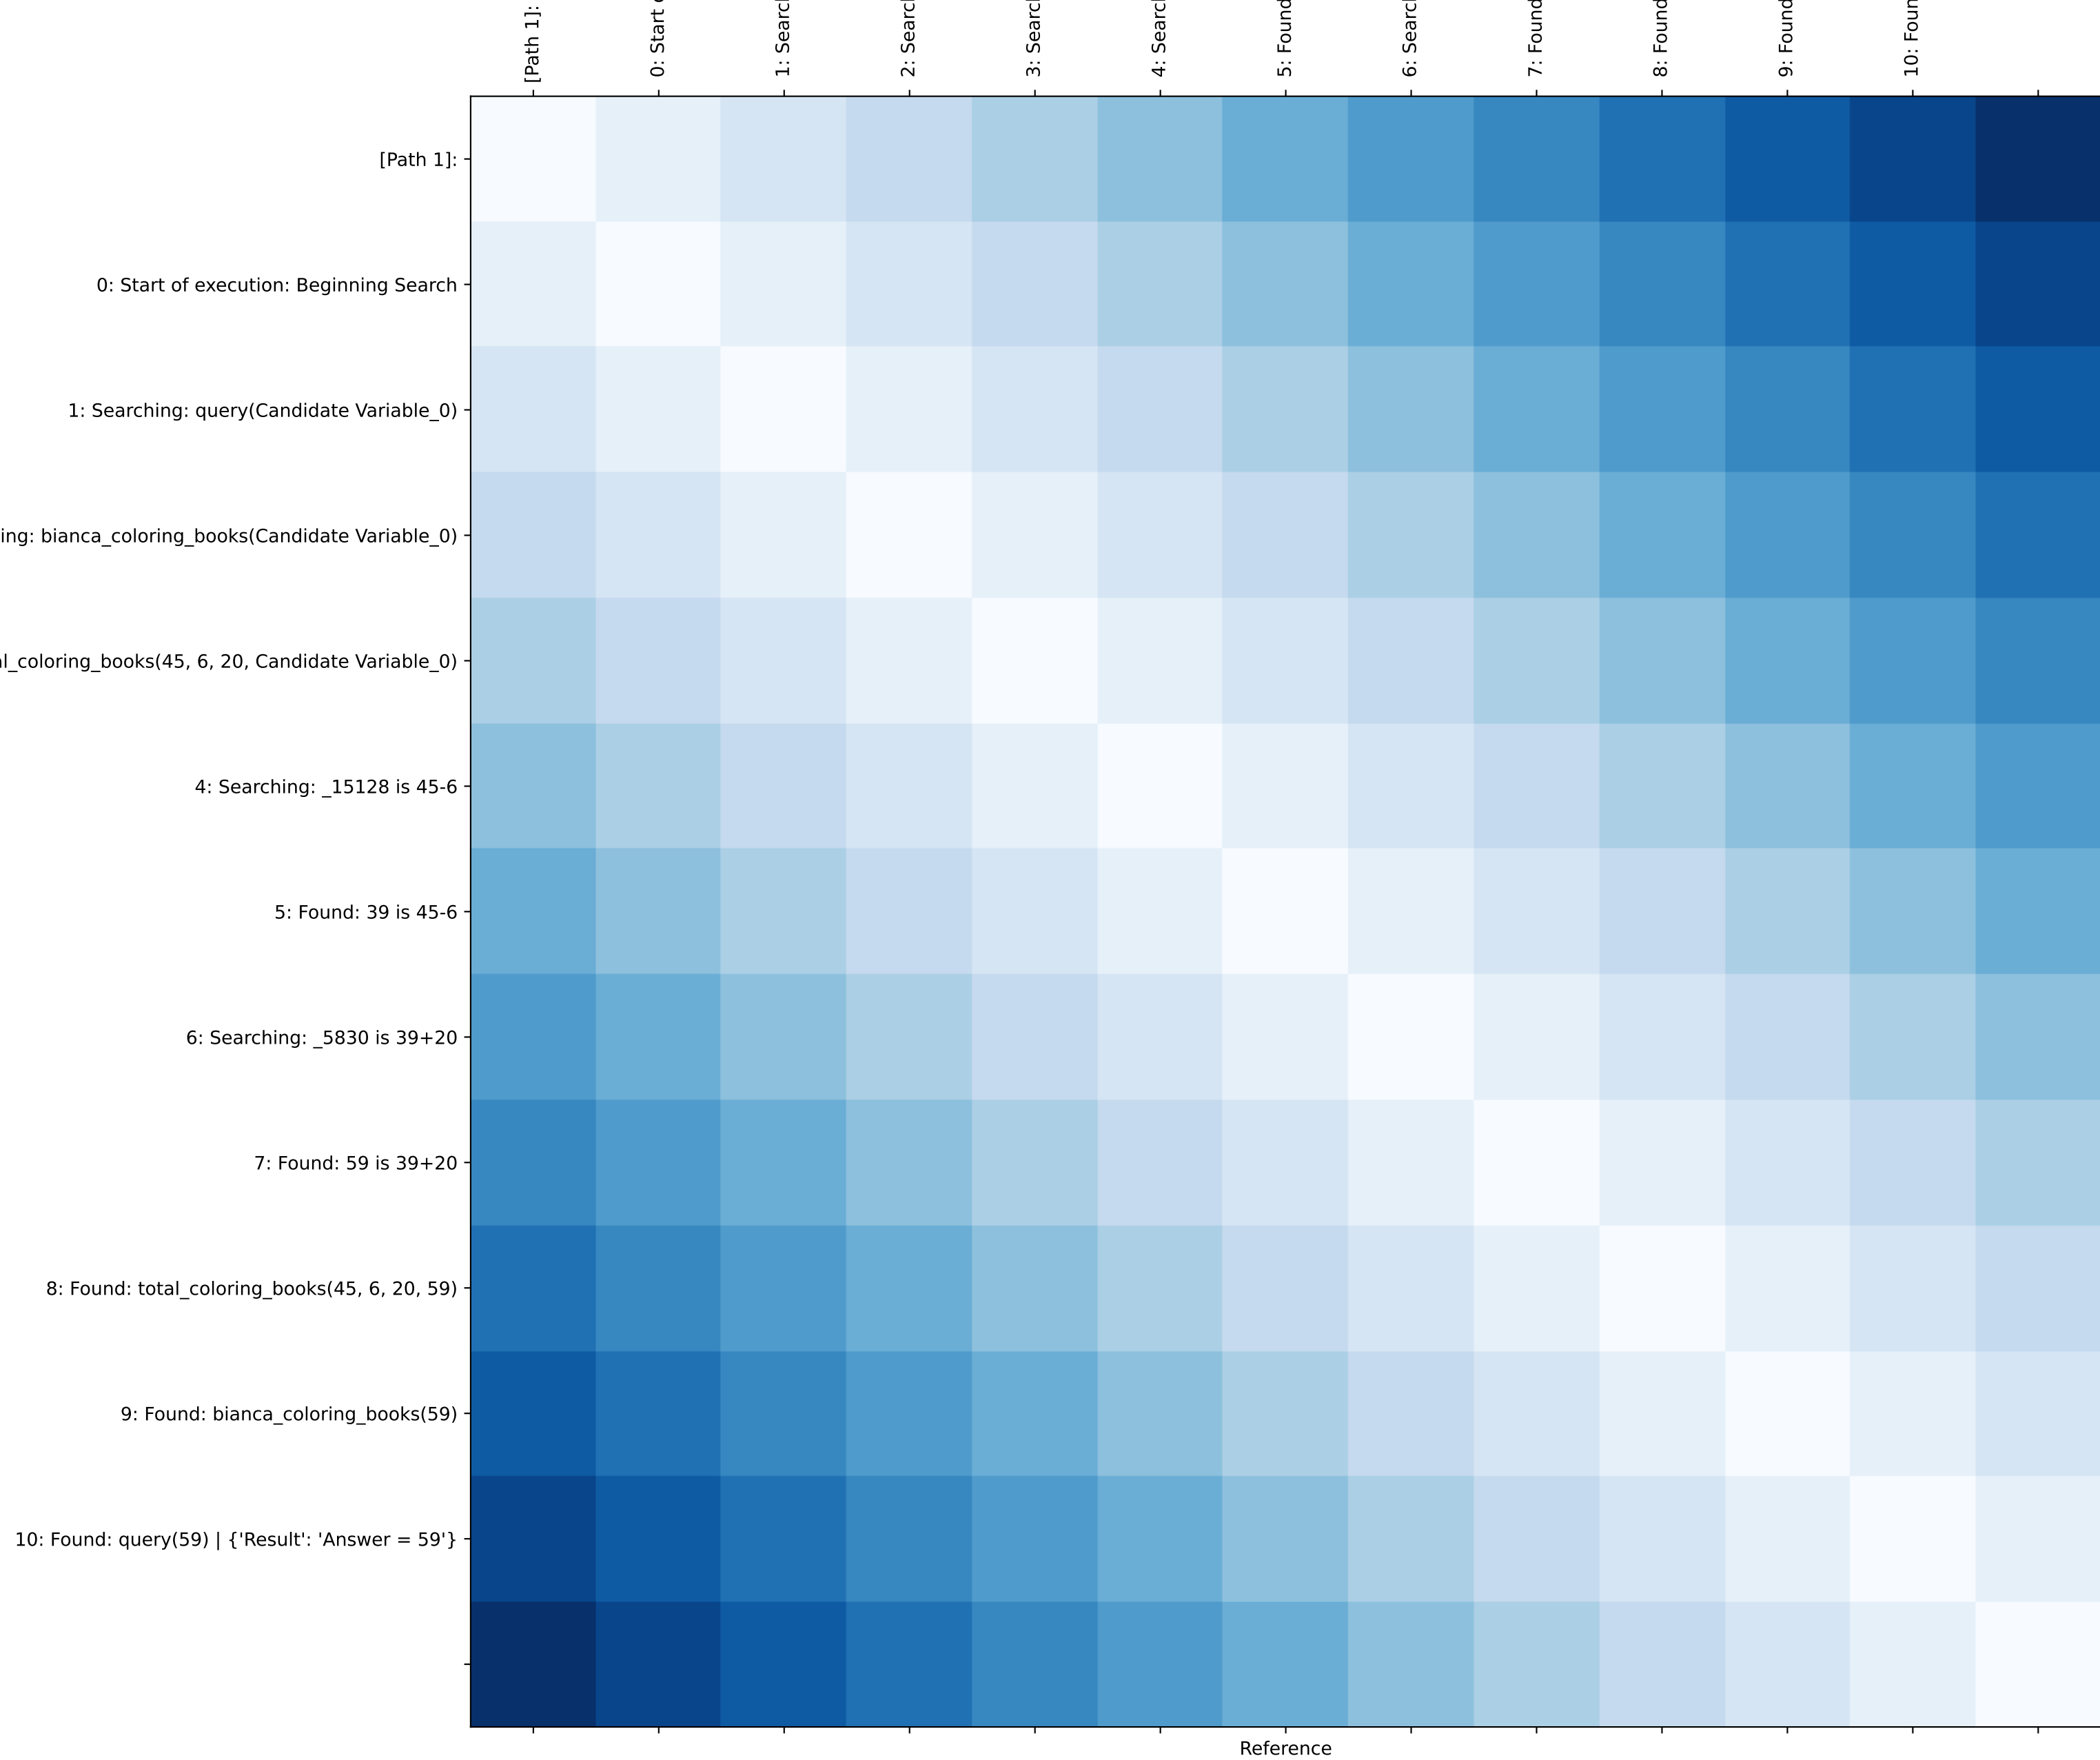

Reference

Supplement: supplementary_material [file attachment]

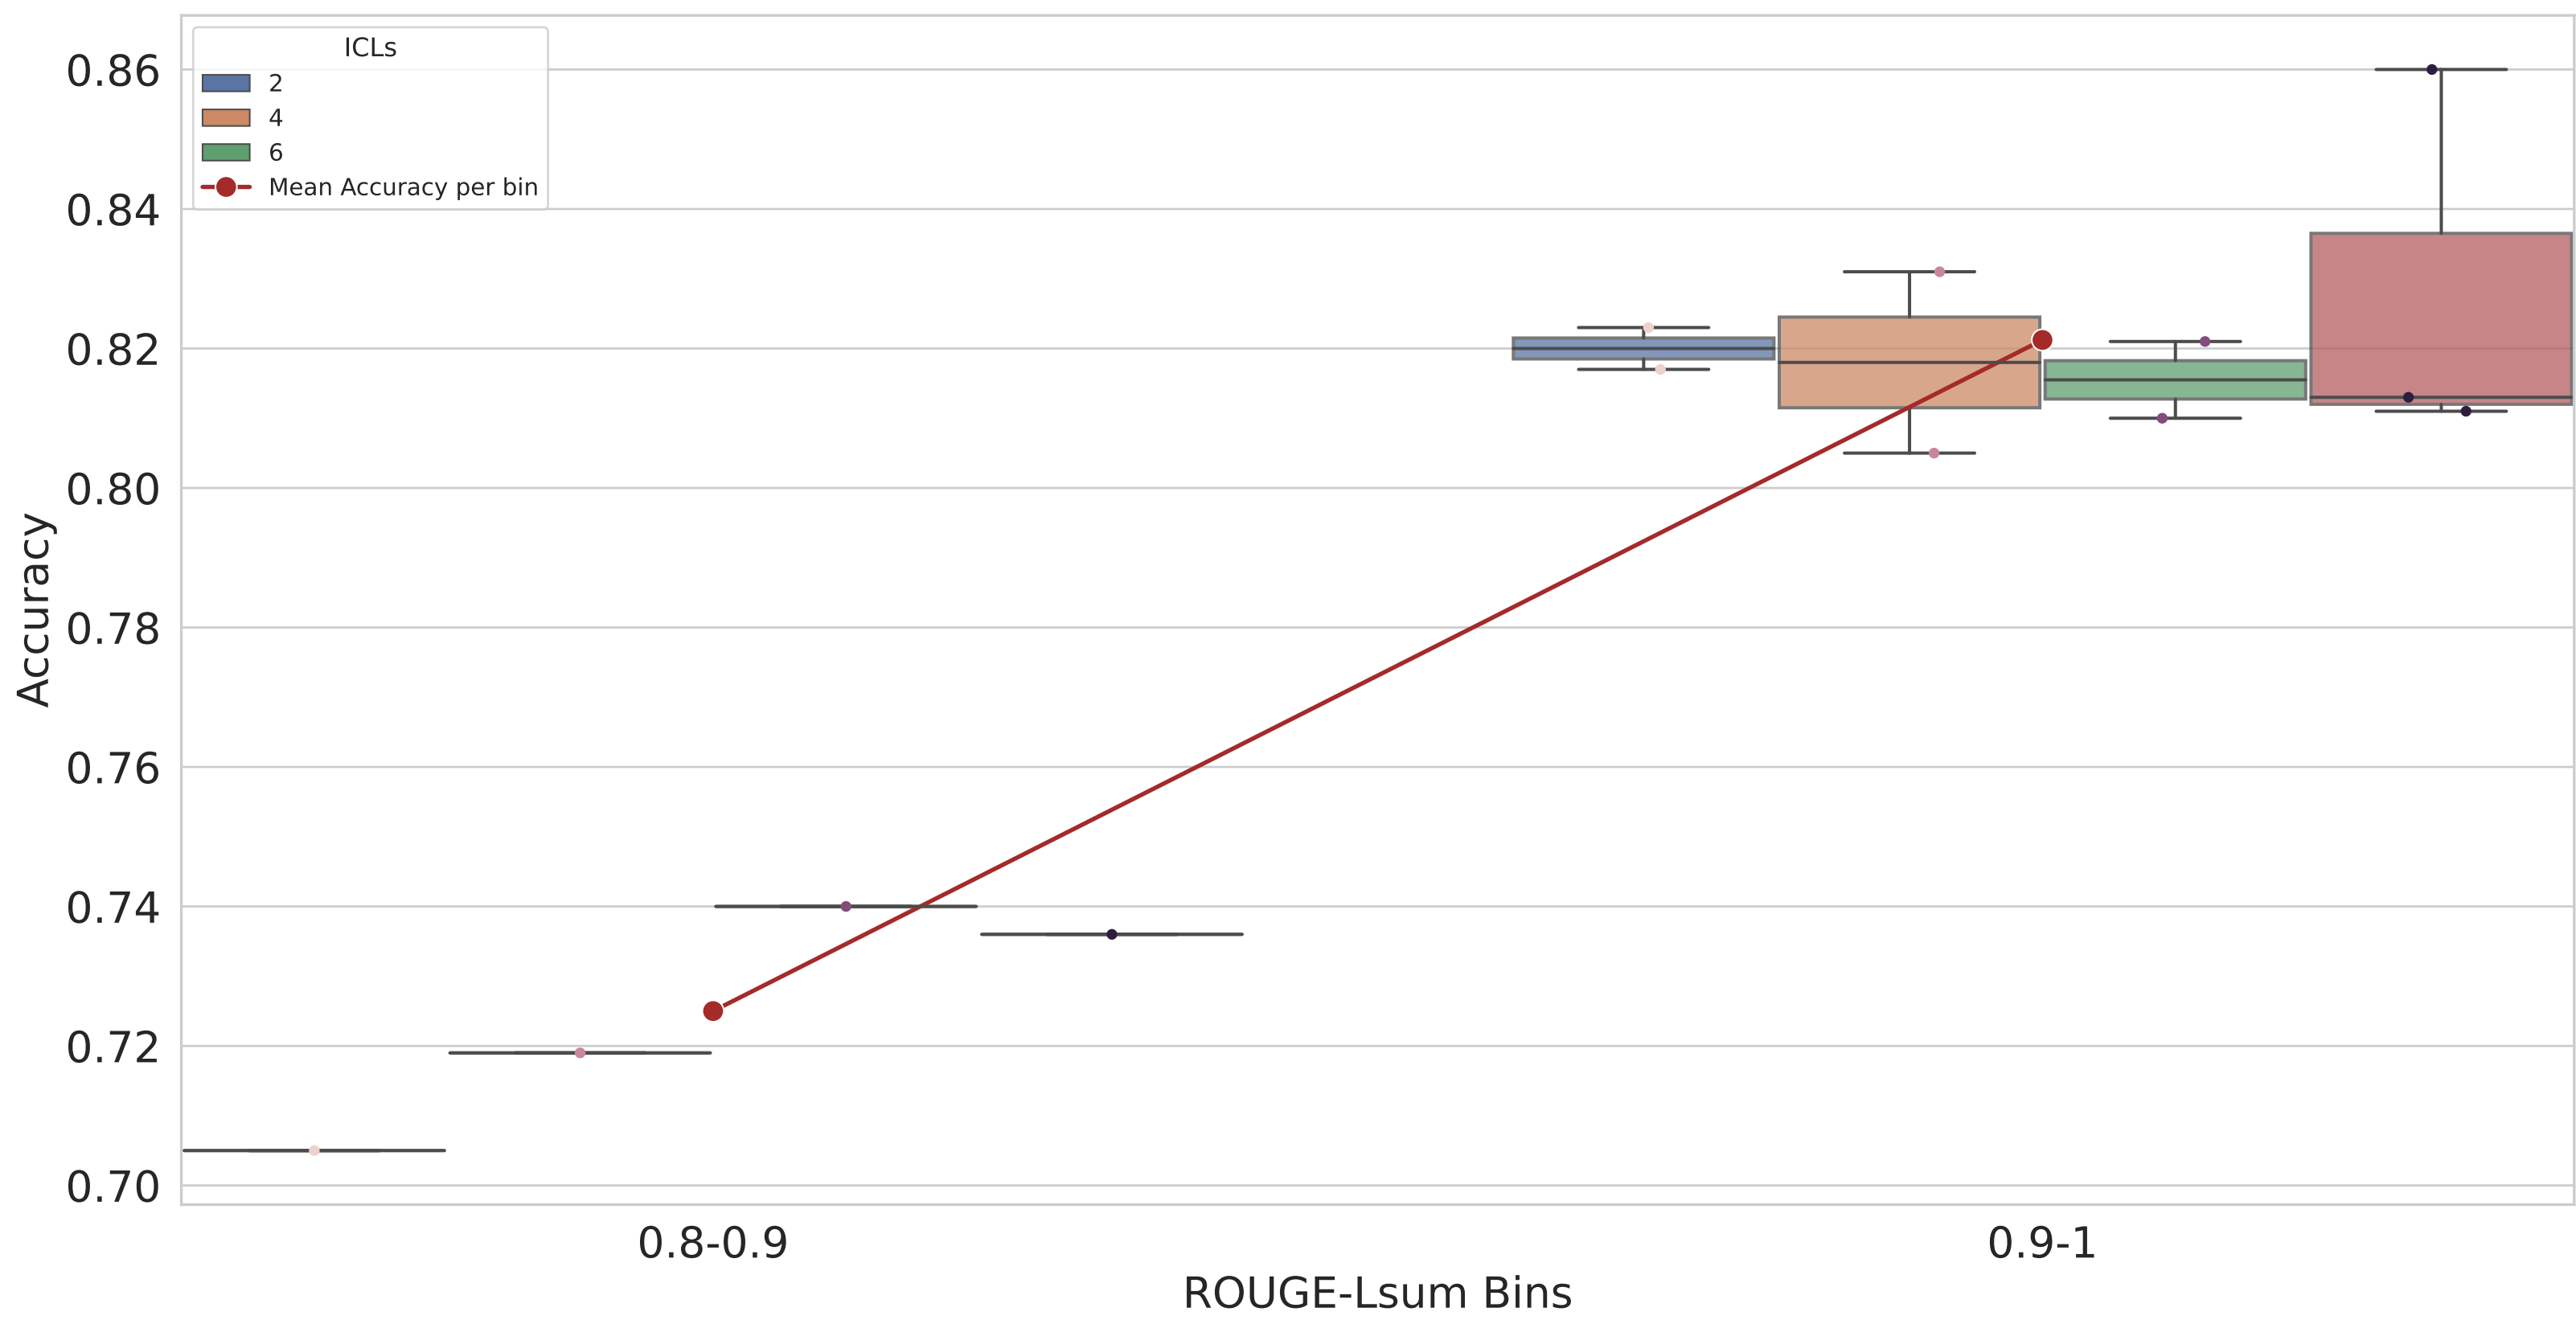

Supplement: supplementary_material [file attachment]

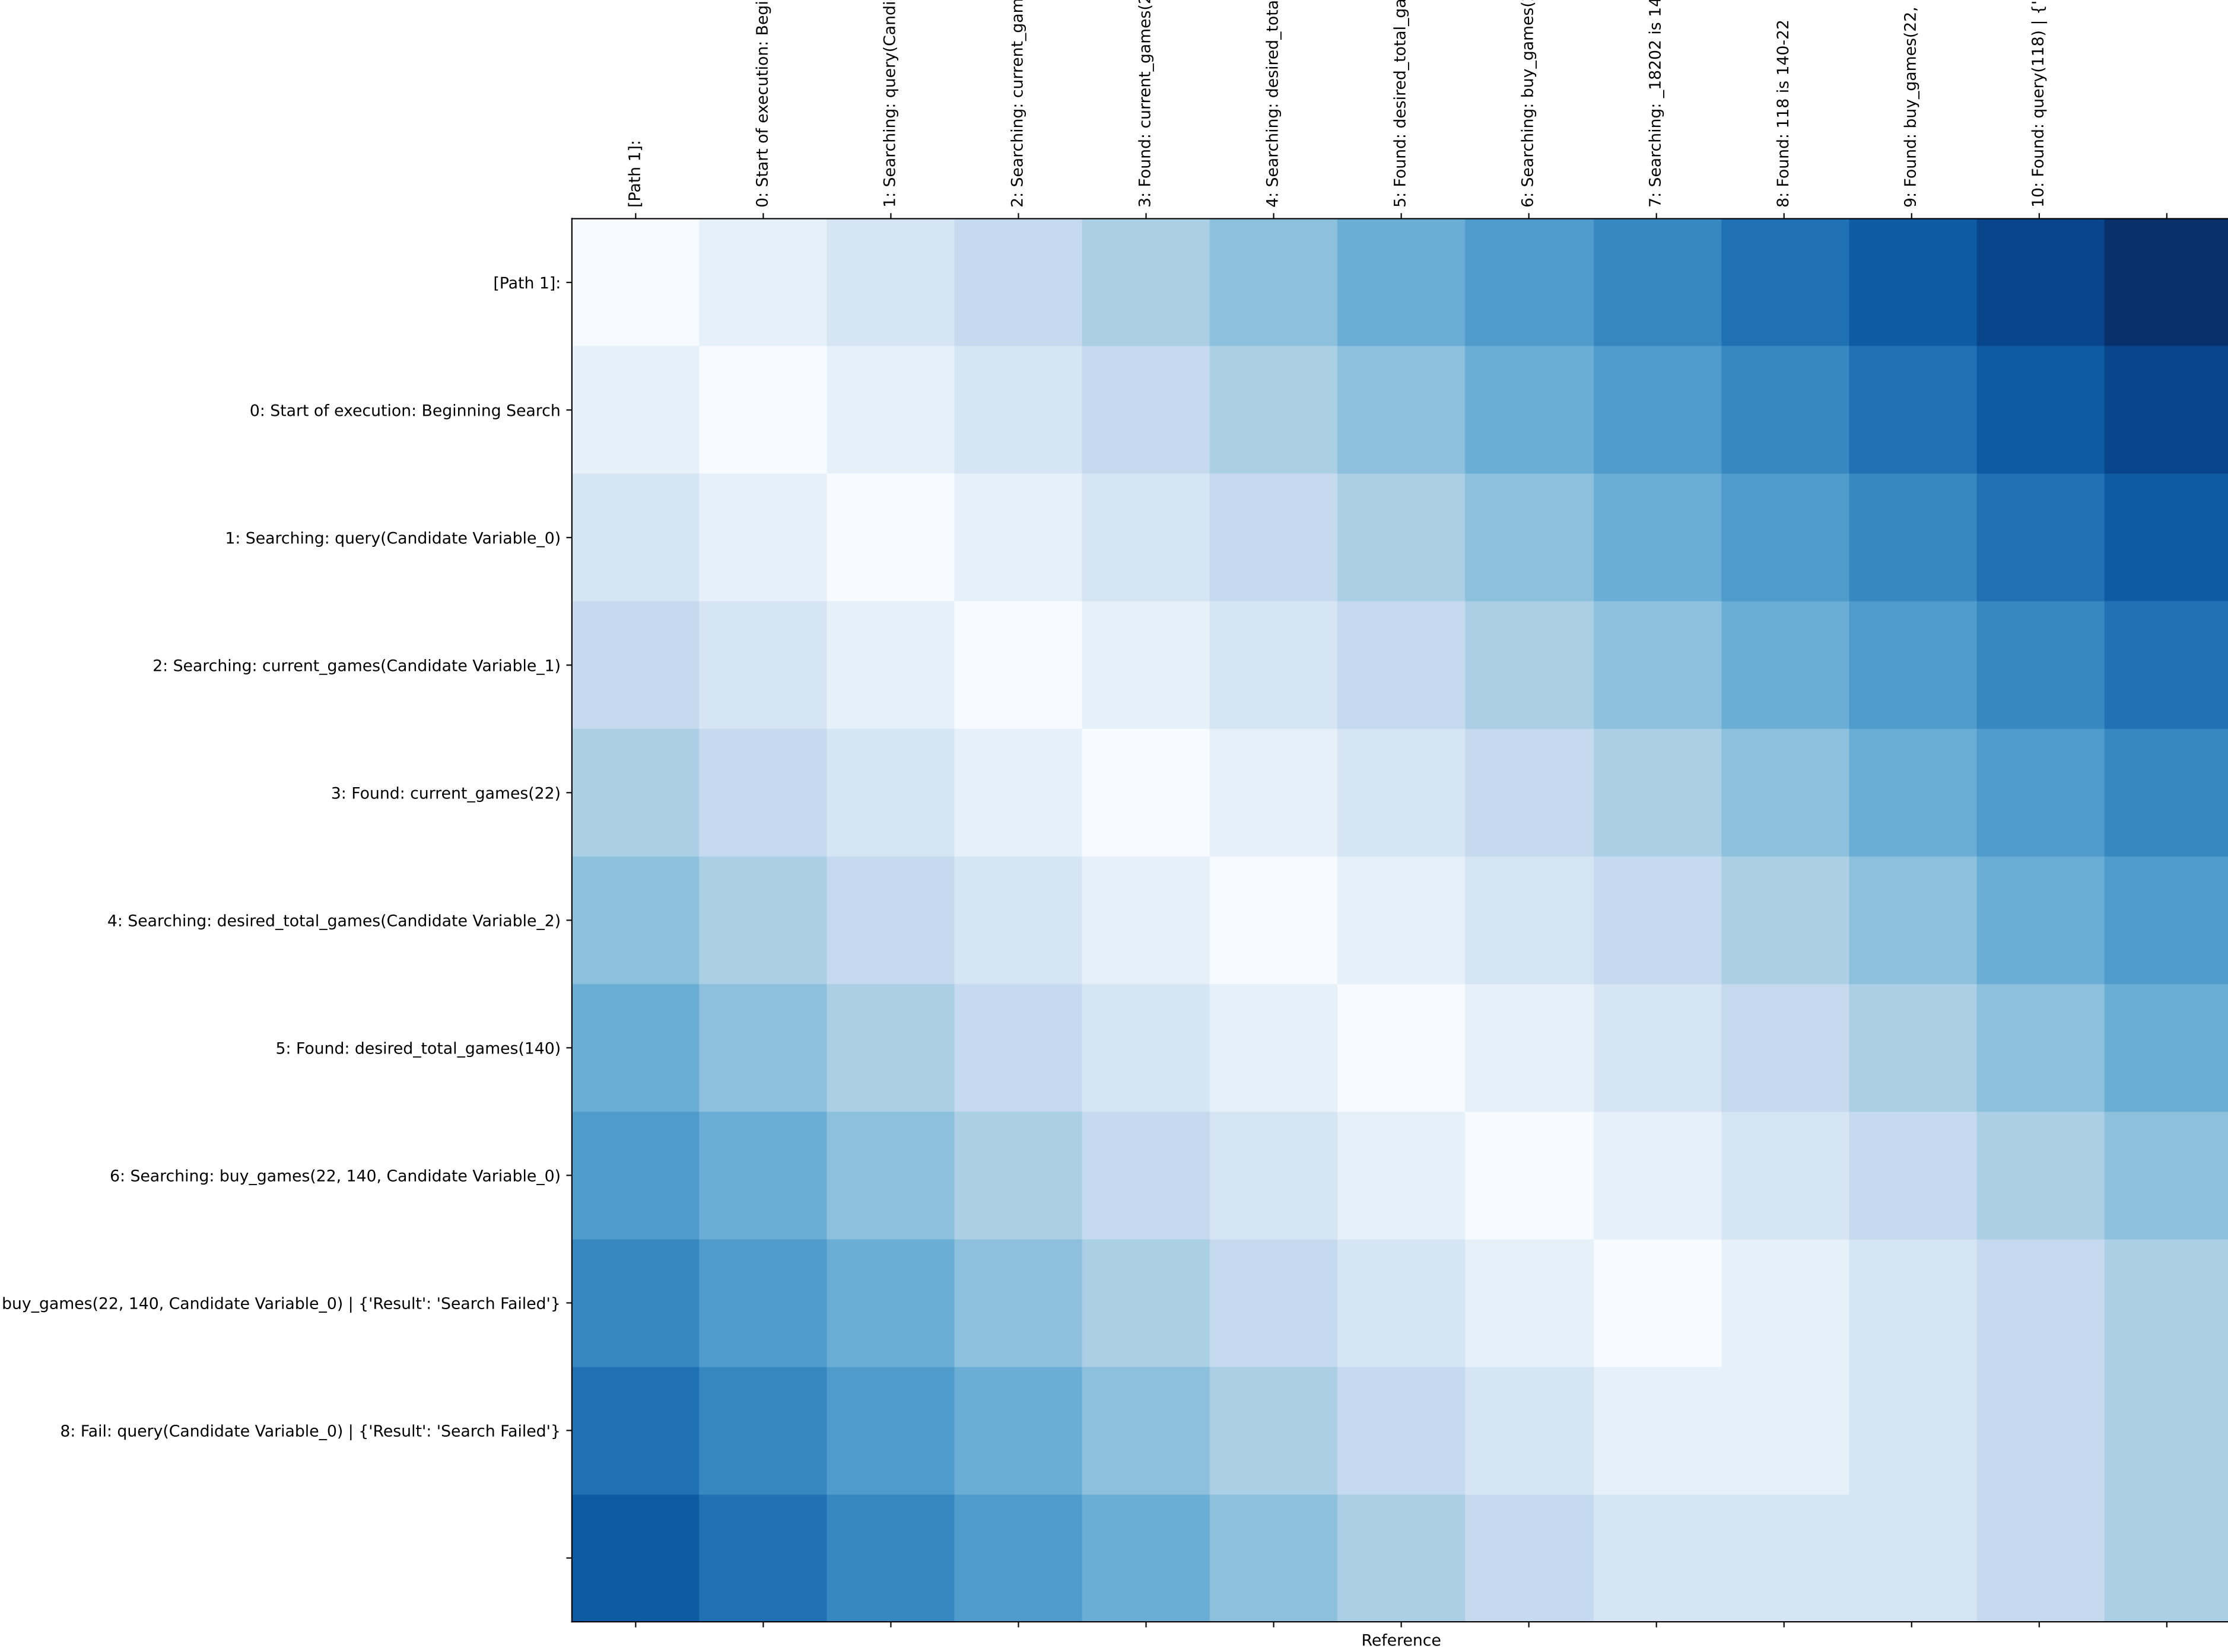

Supplement: supplementary_material [file attachment]

Hypothesis

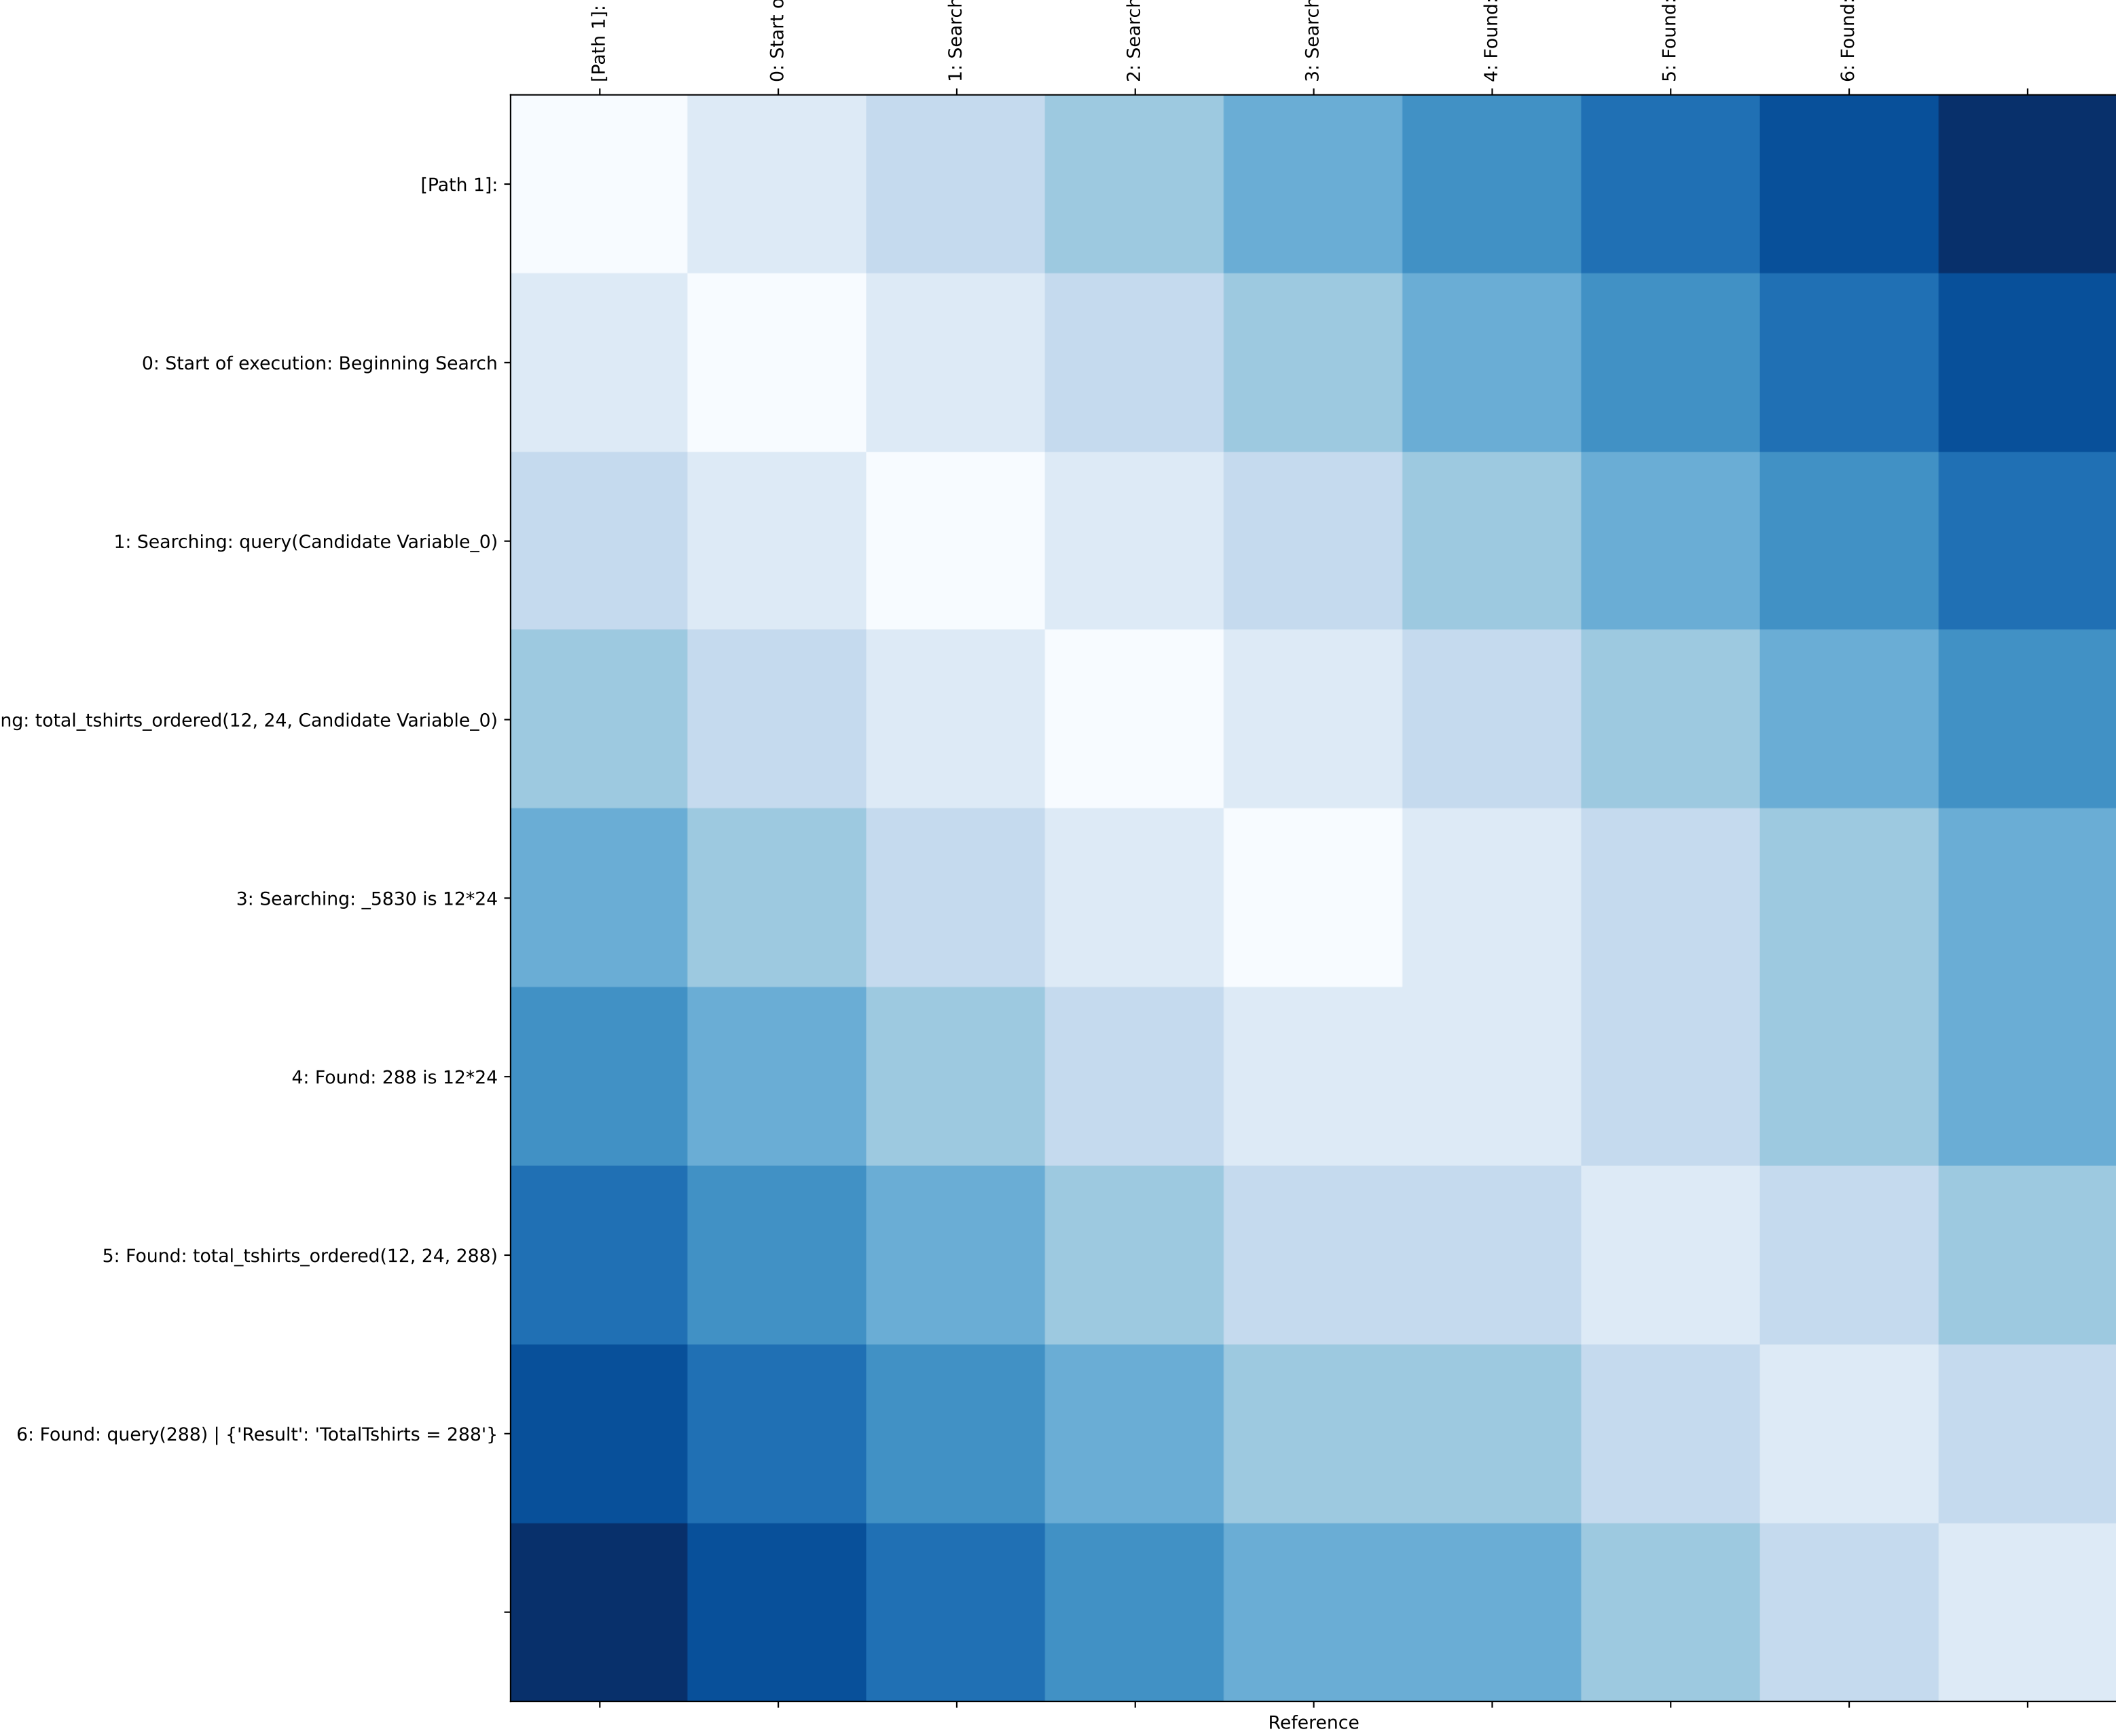

Reference

Supplement: supplementary_material [file attachment]

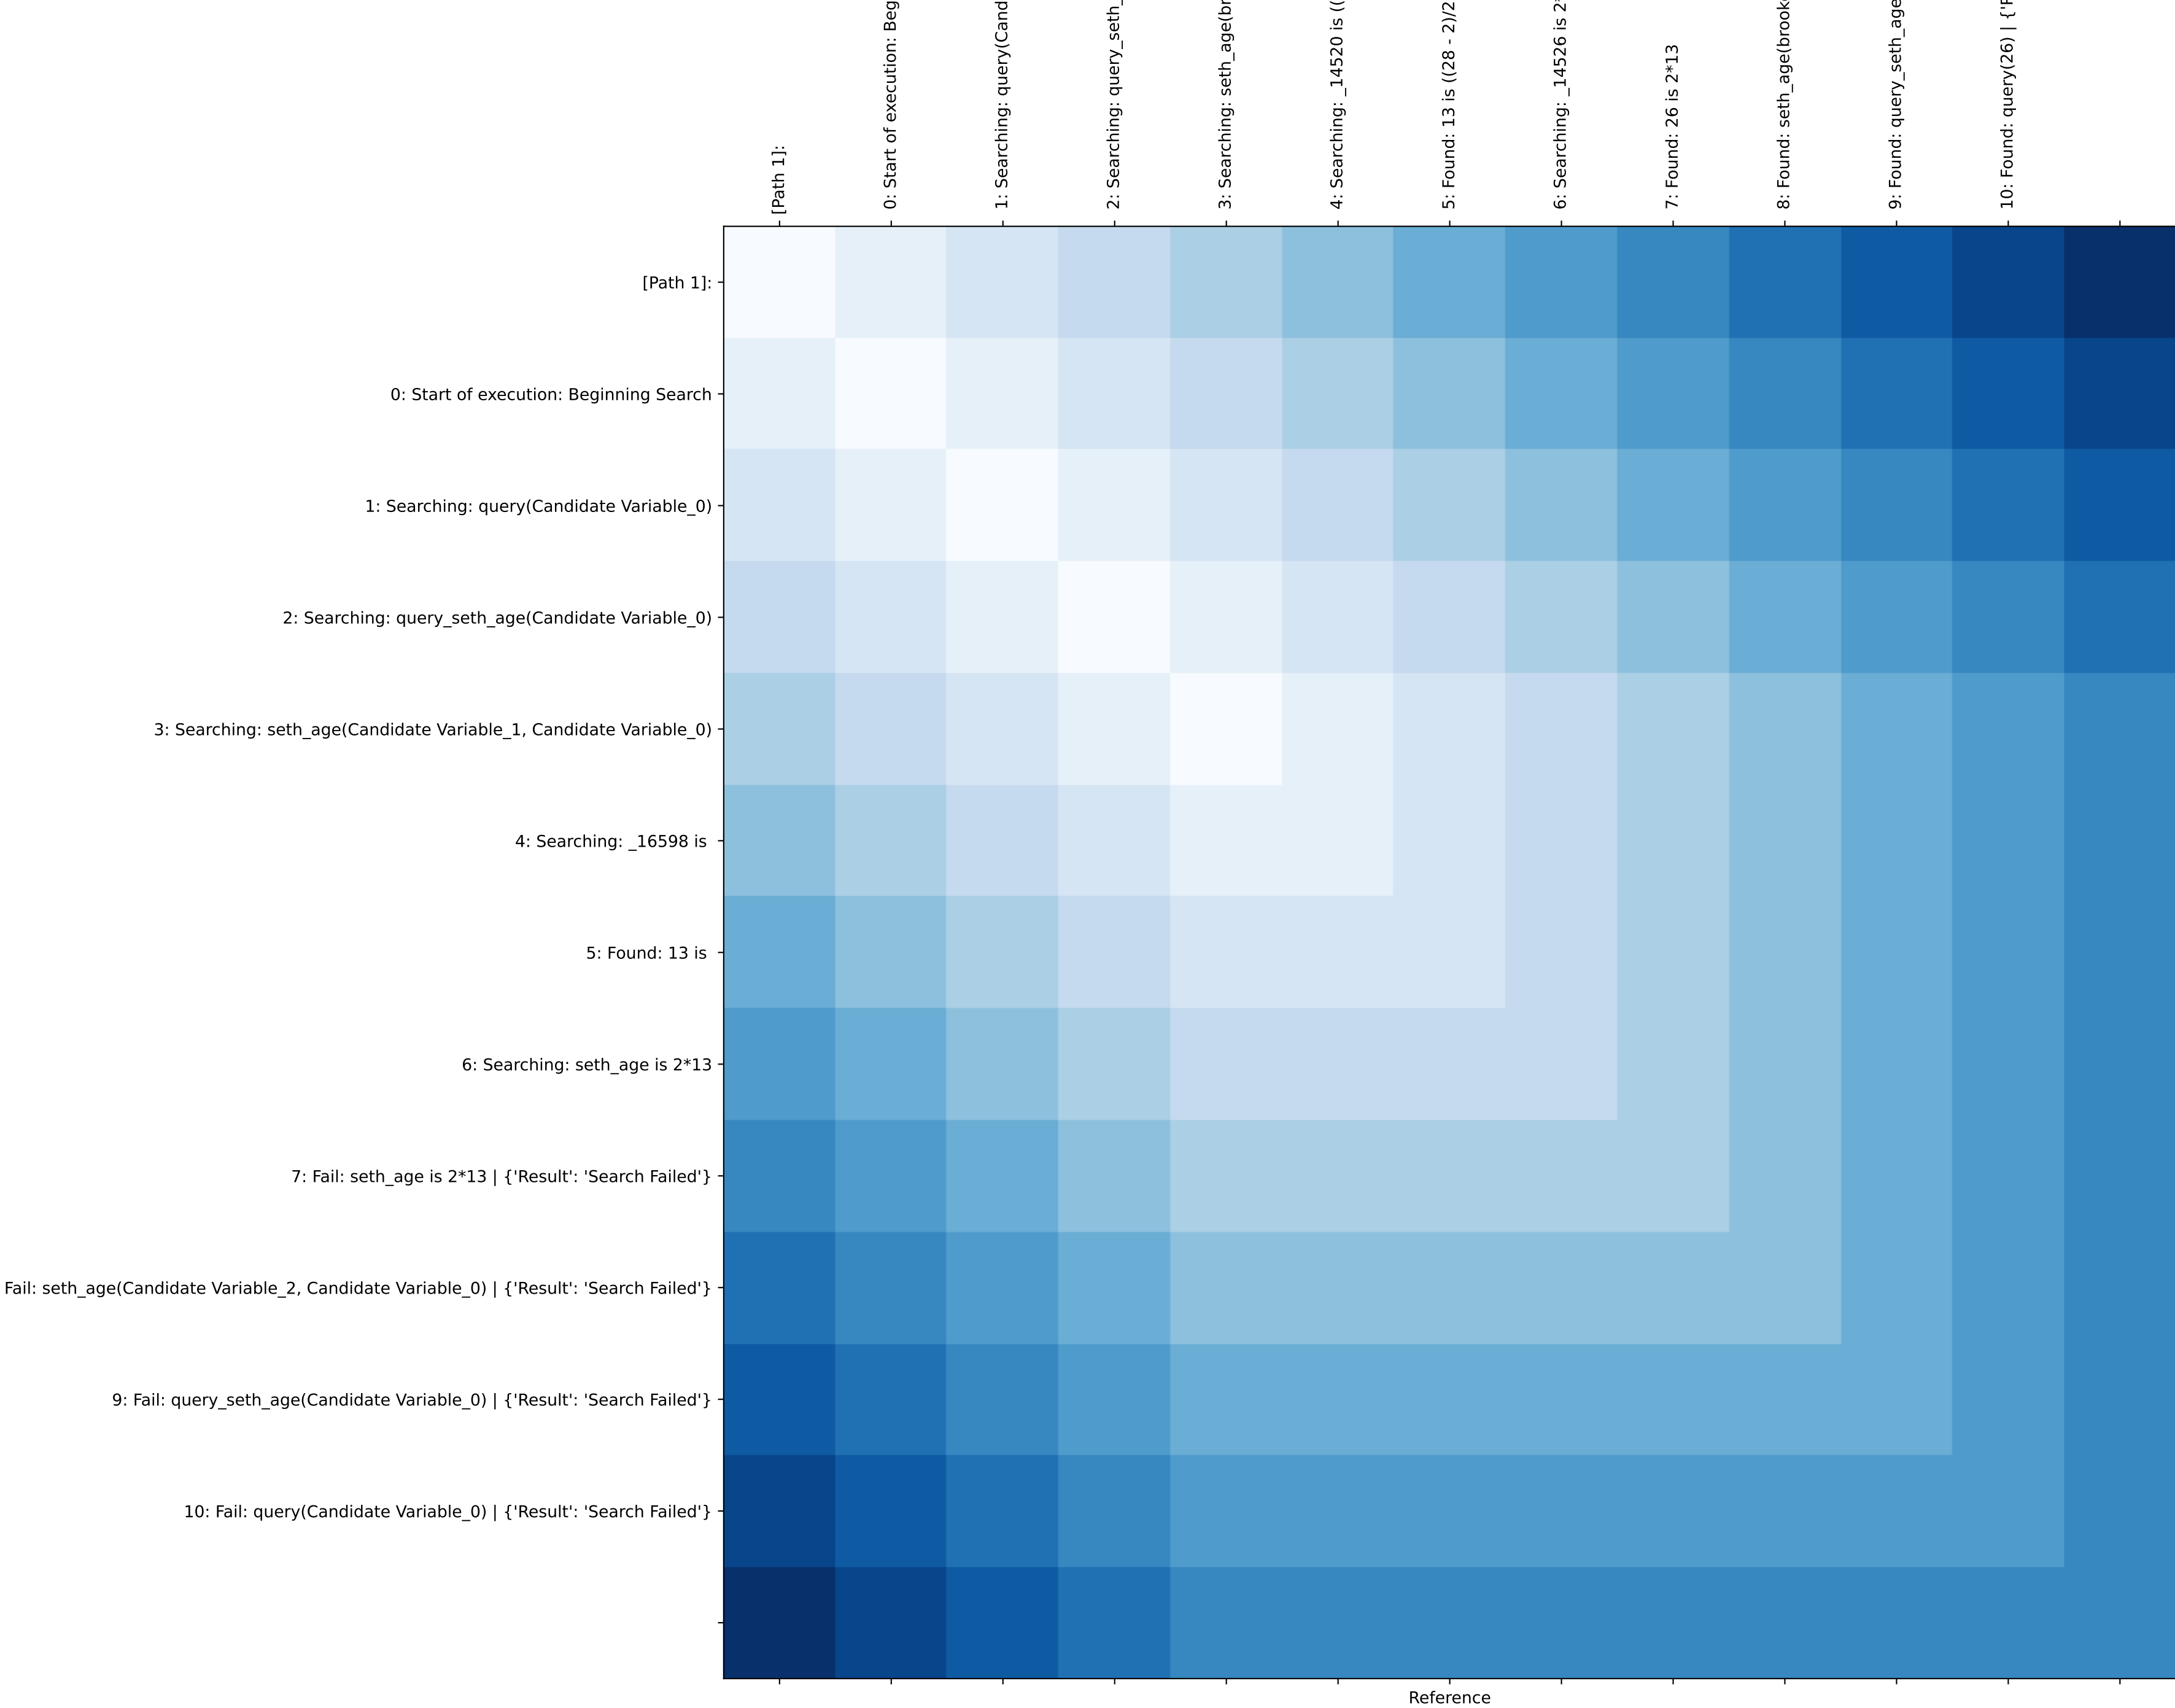

Supplement: supplementary_material [file attachment]

Hypothesis

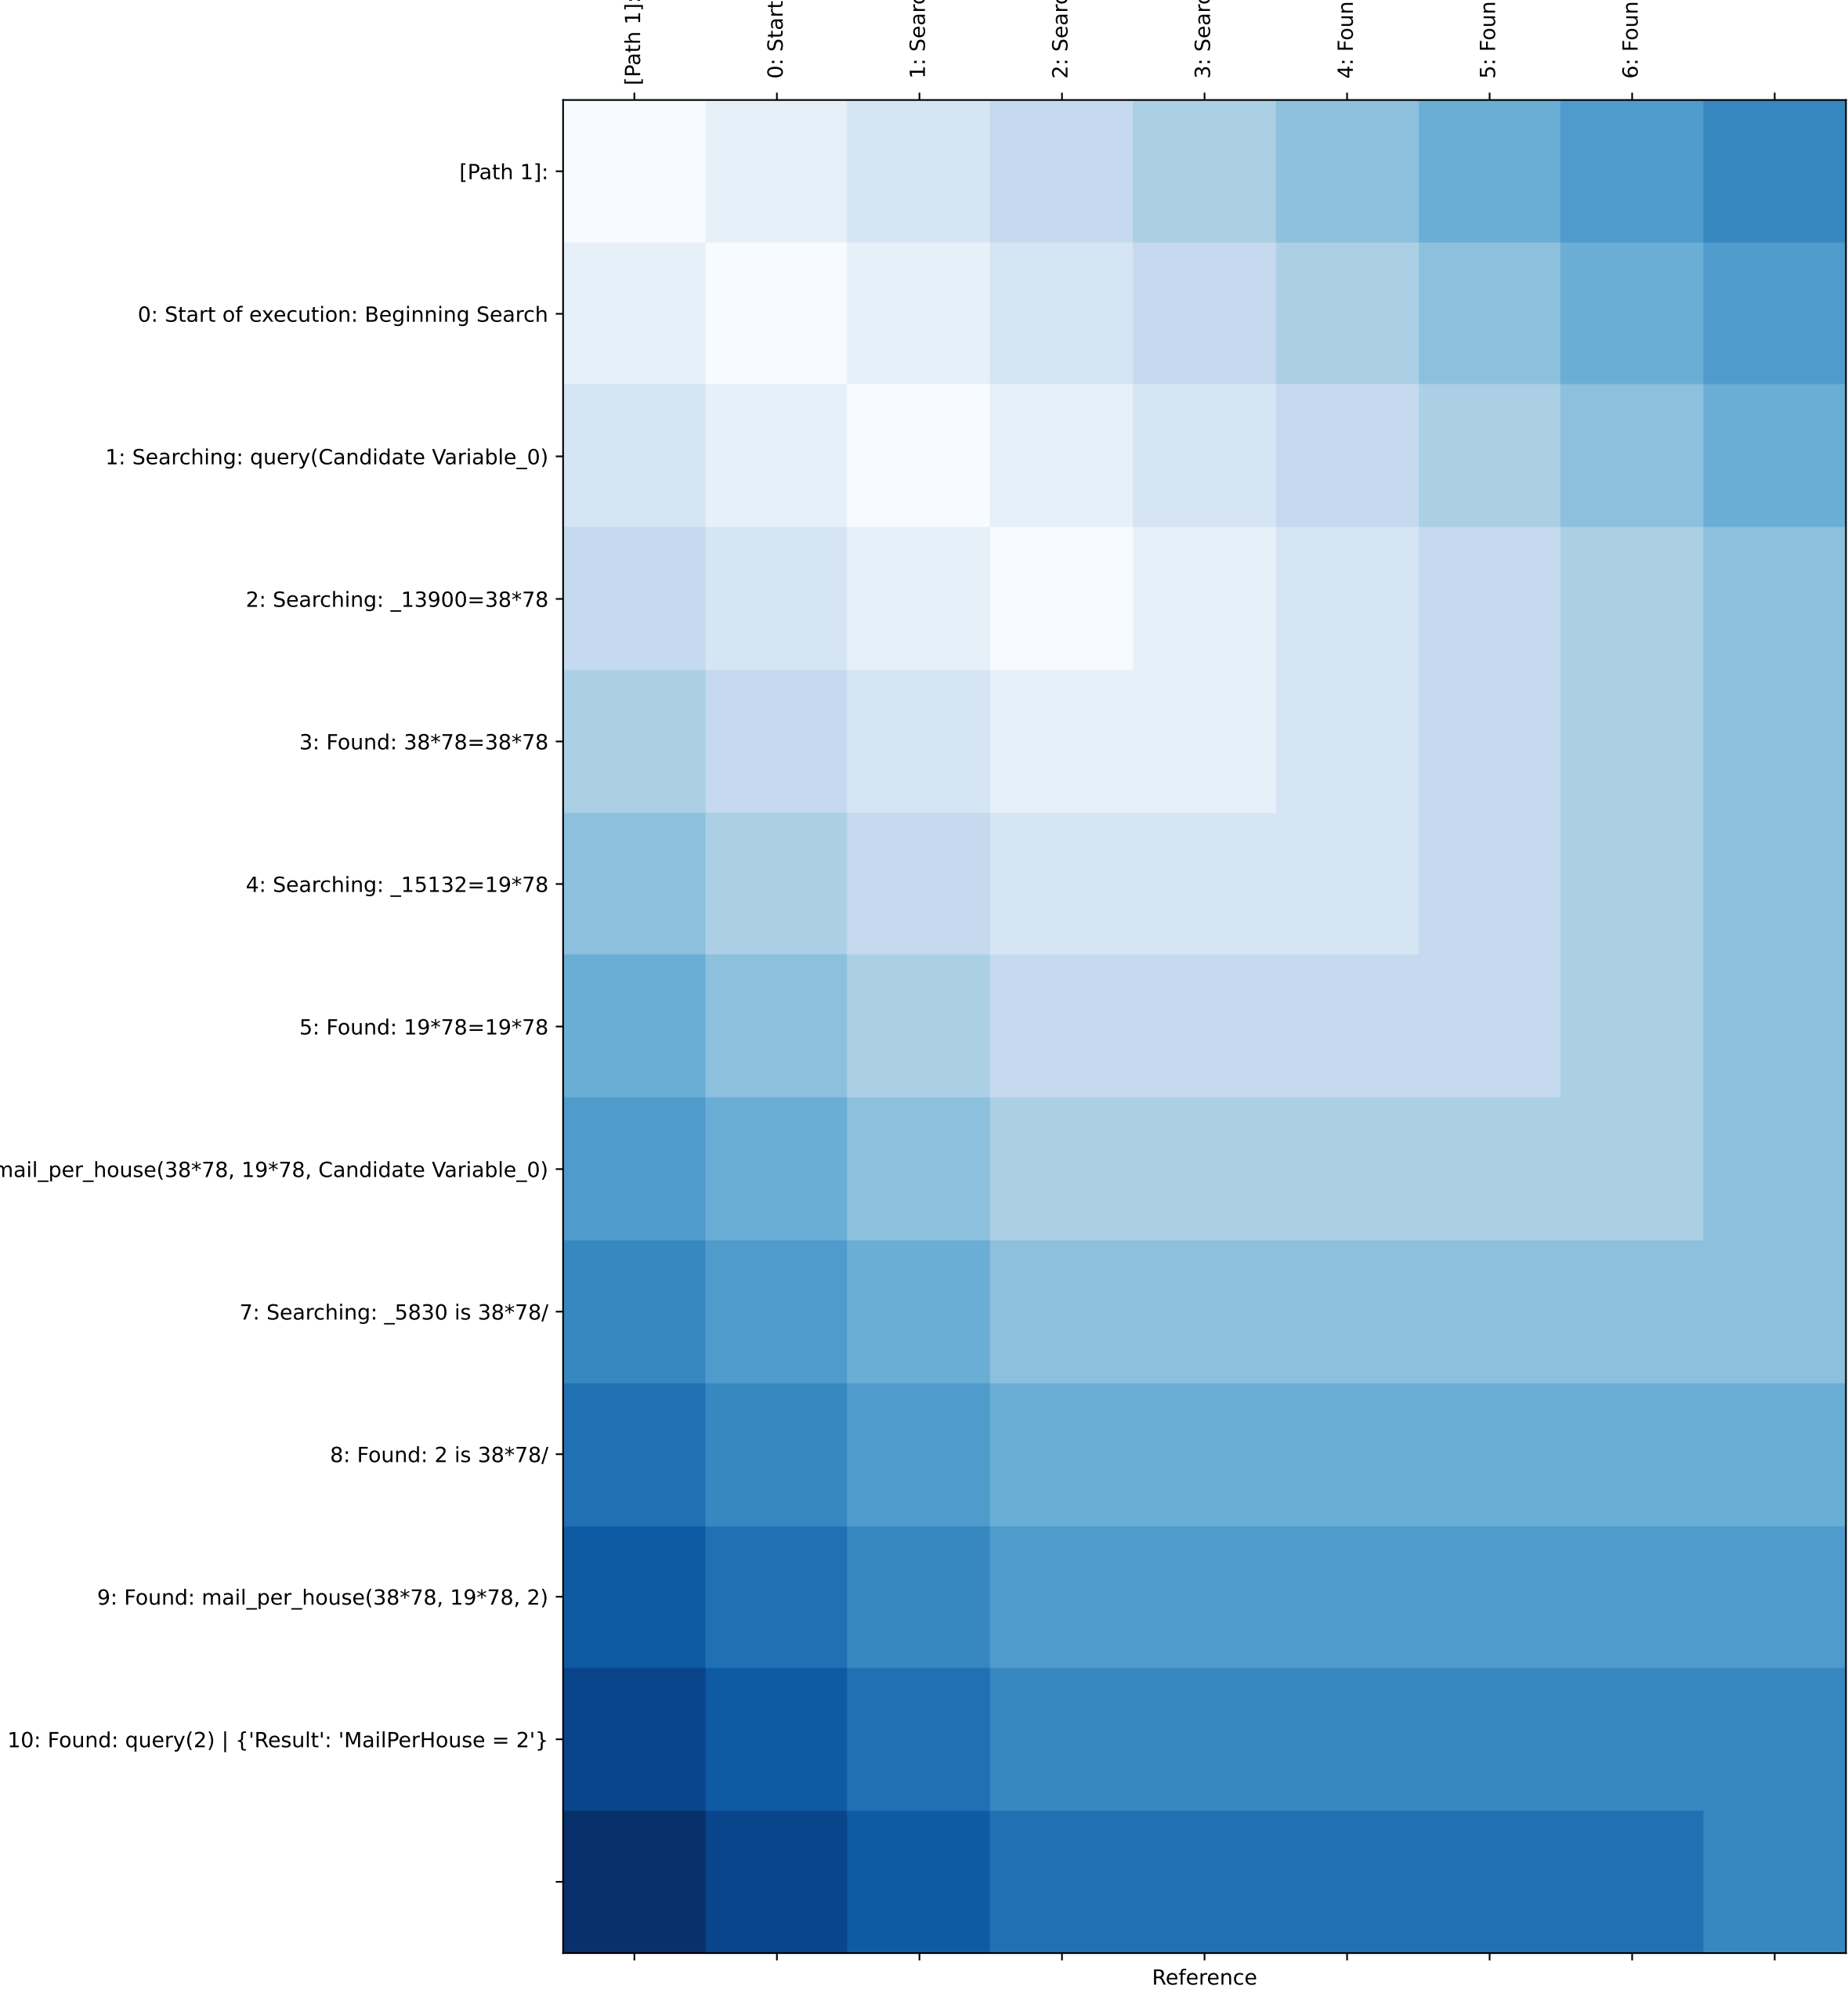

Reference

Supplement: supplementary_material [file attachment]

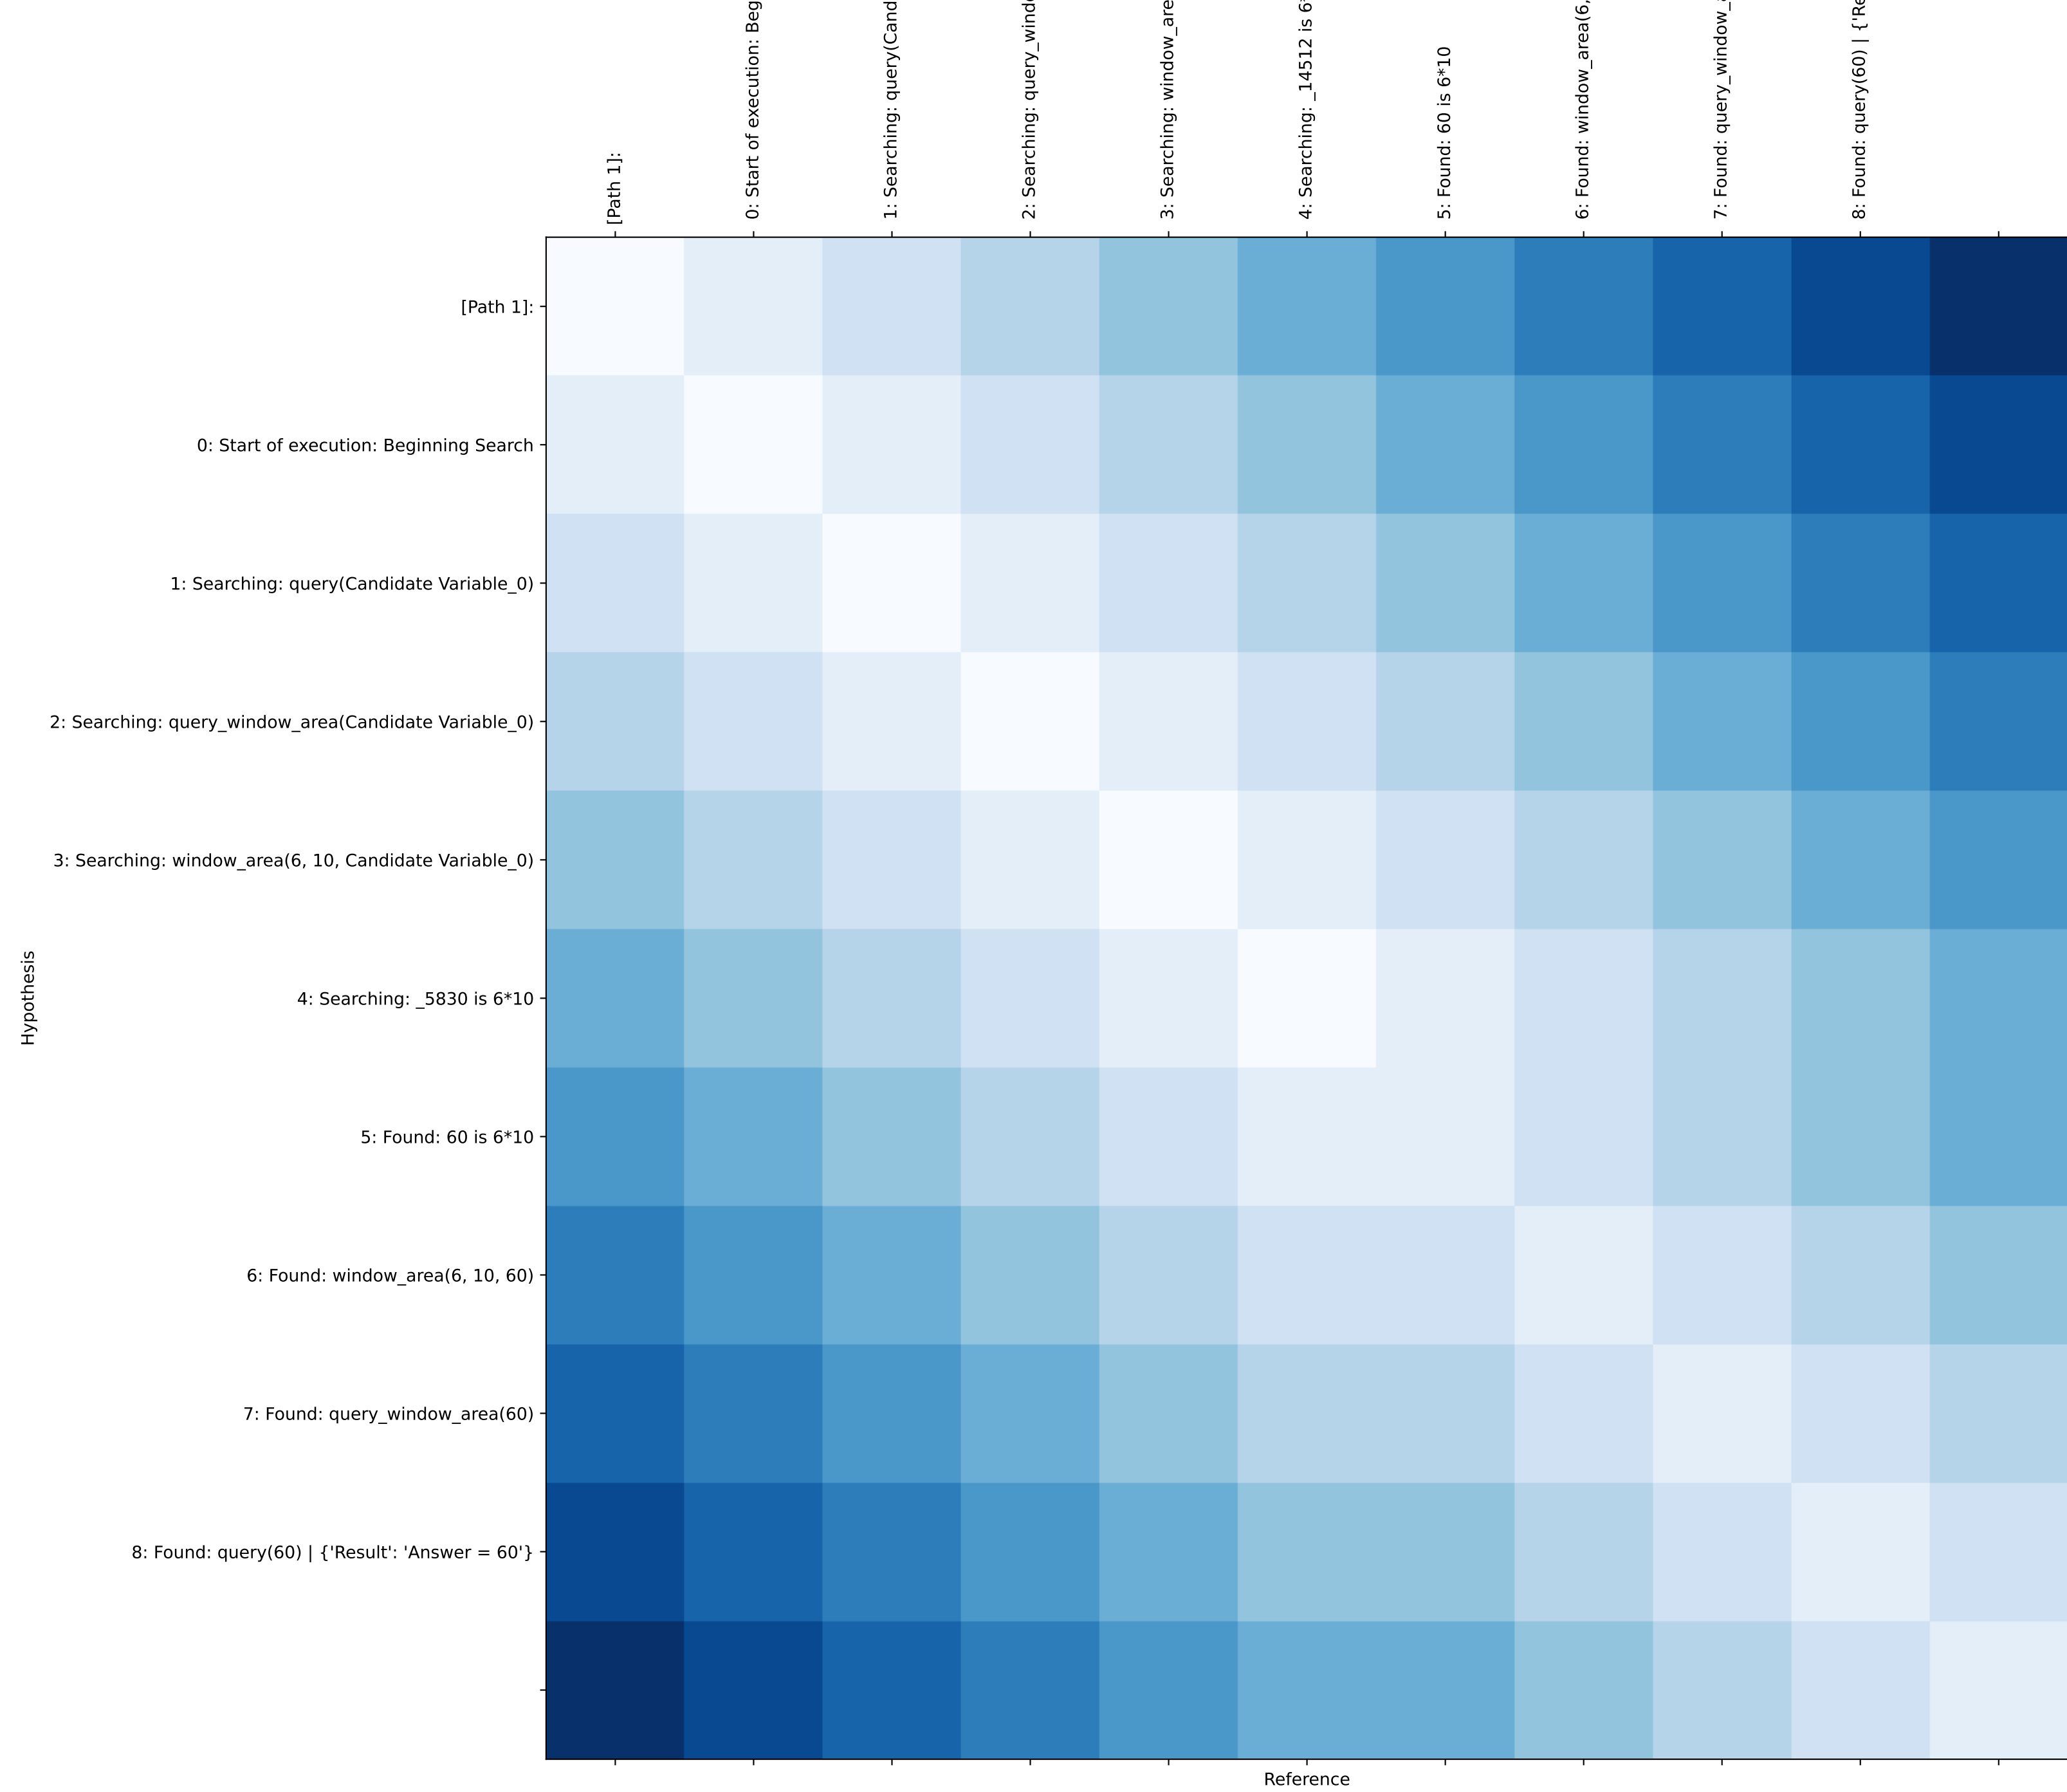

Supplement: supplementary_material [file attachment]

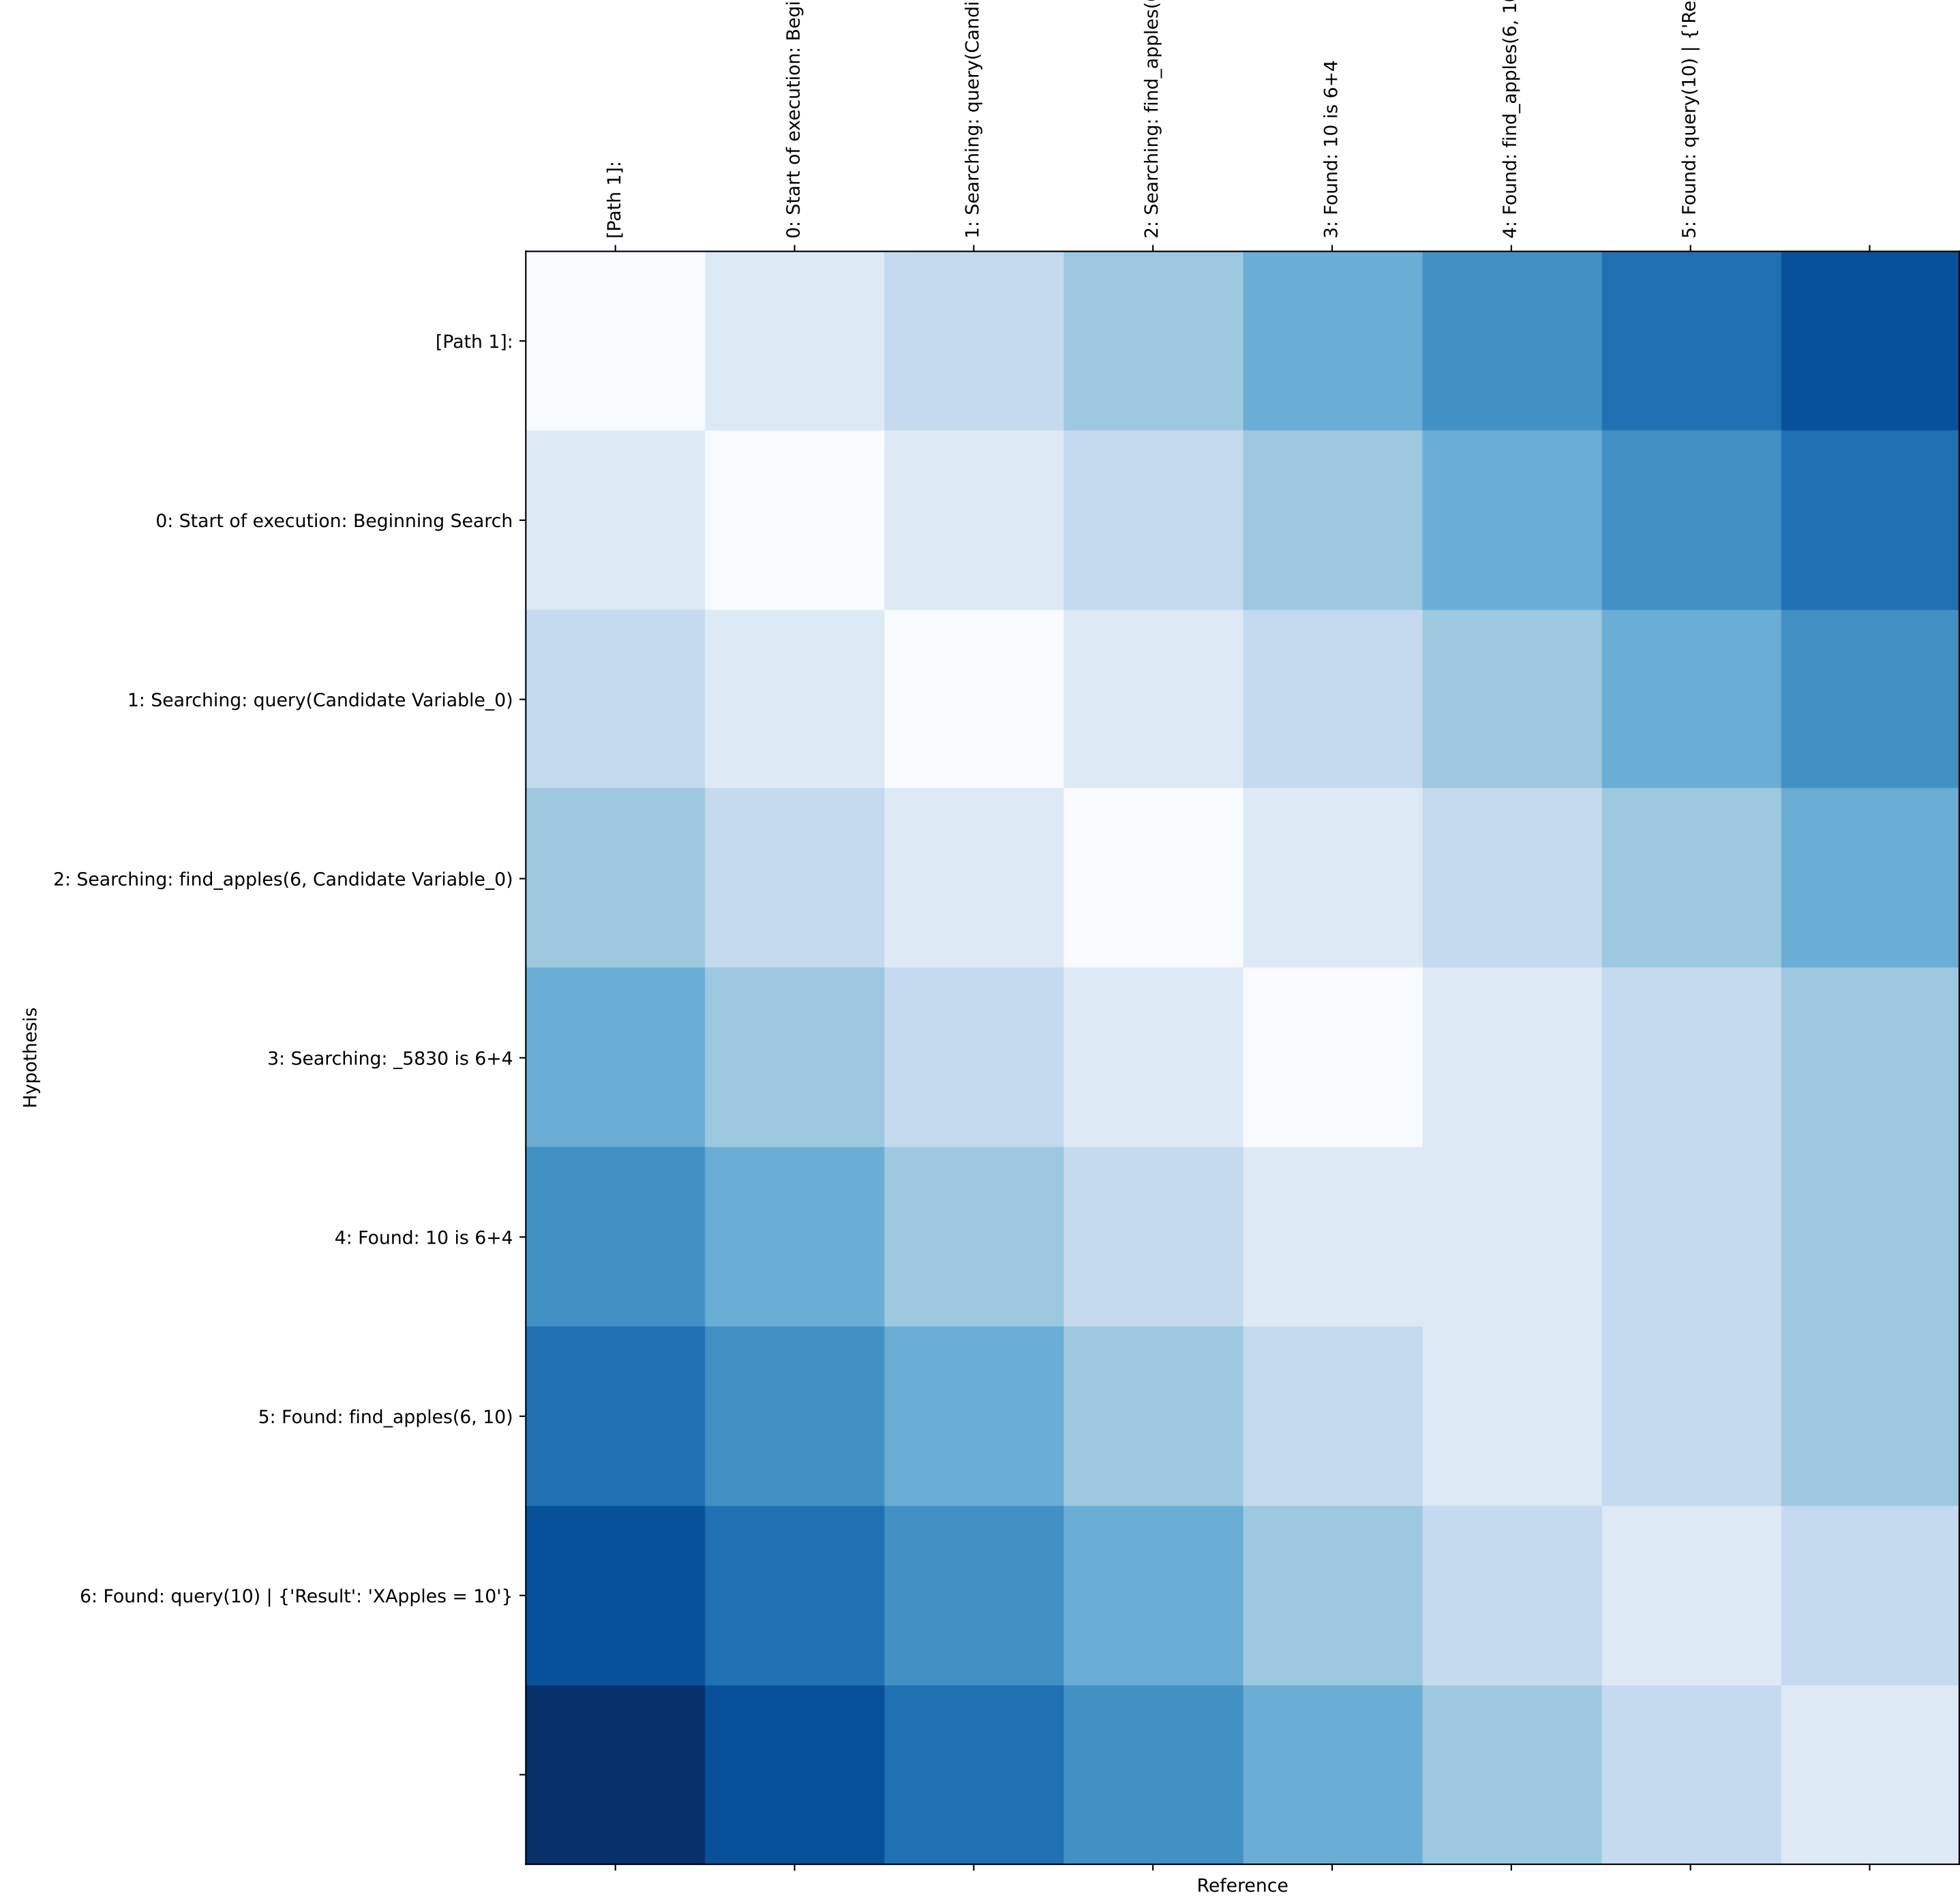

Supplement: supplementary_material [file attachment]

Hypothesis

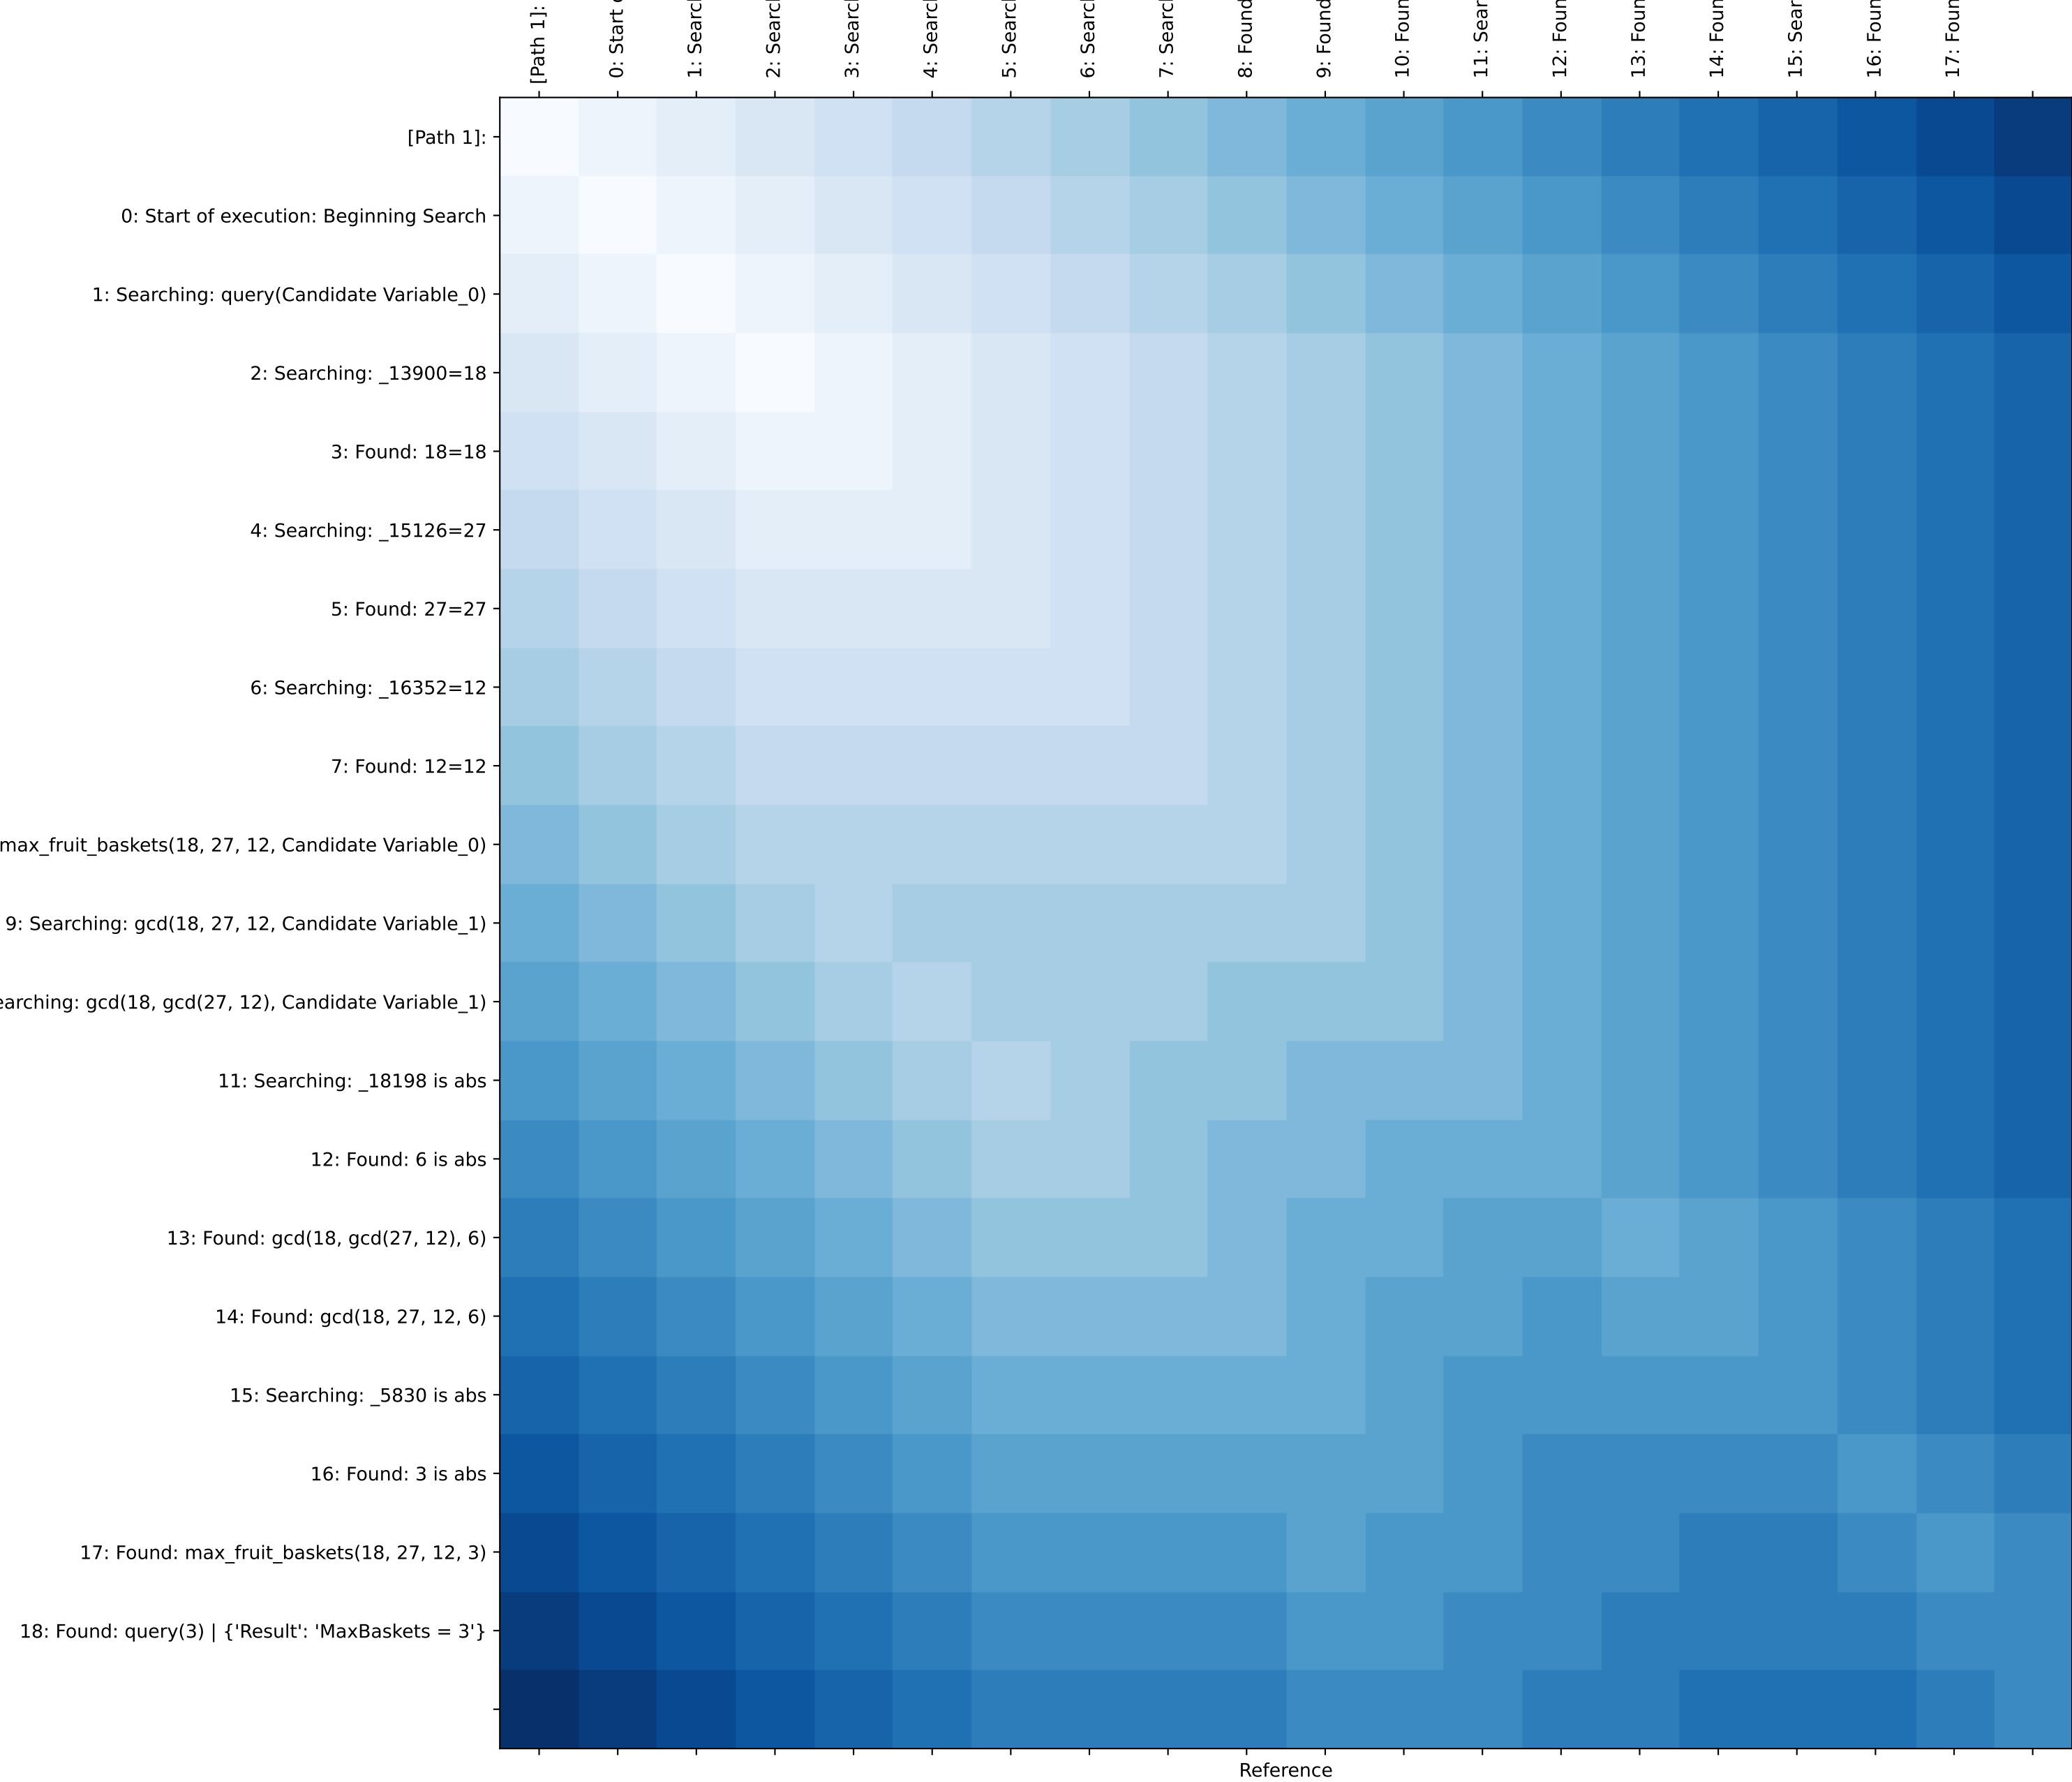

Reference

Supplement: supplementary_material [file attachment]

Hypothesis

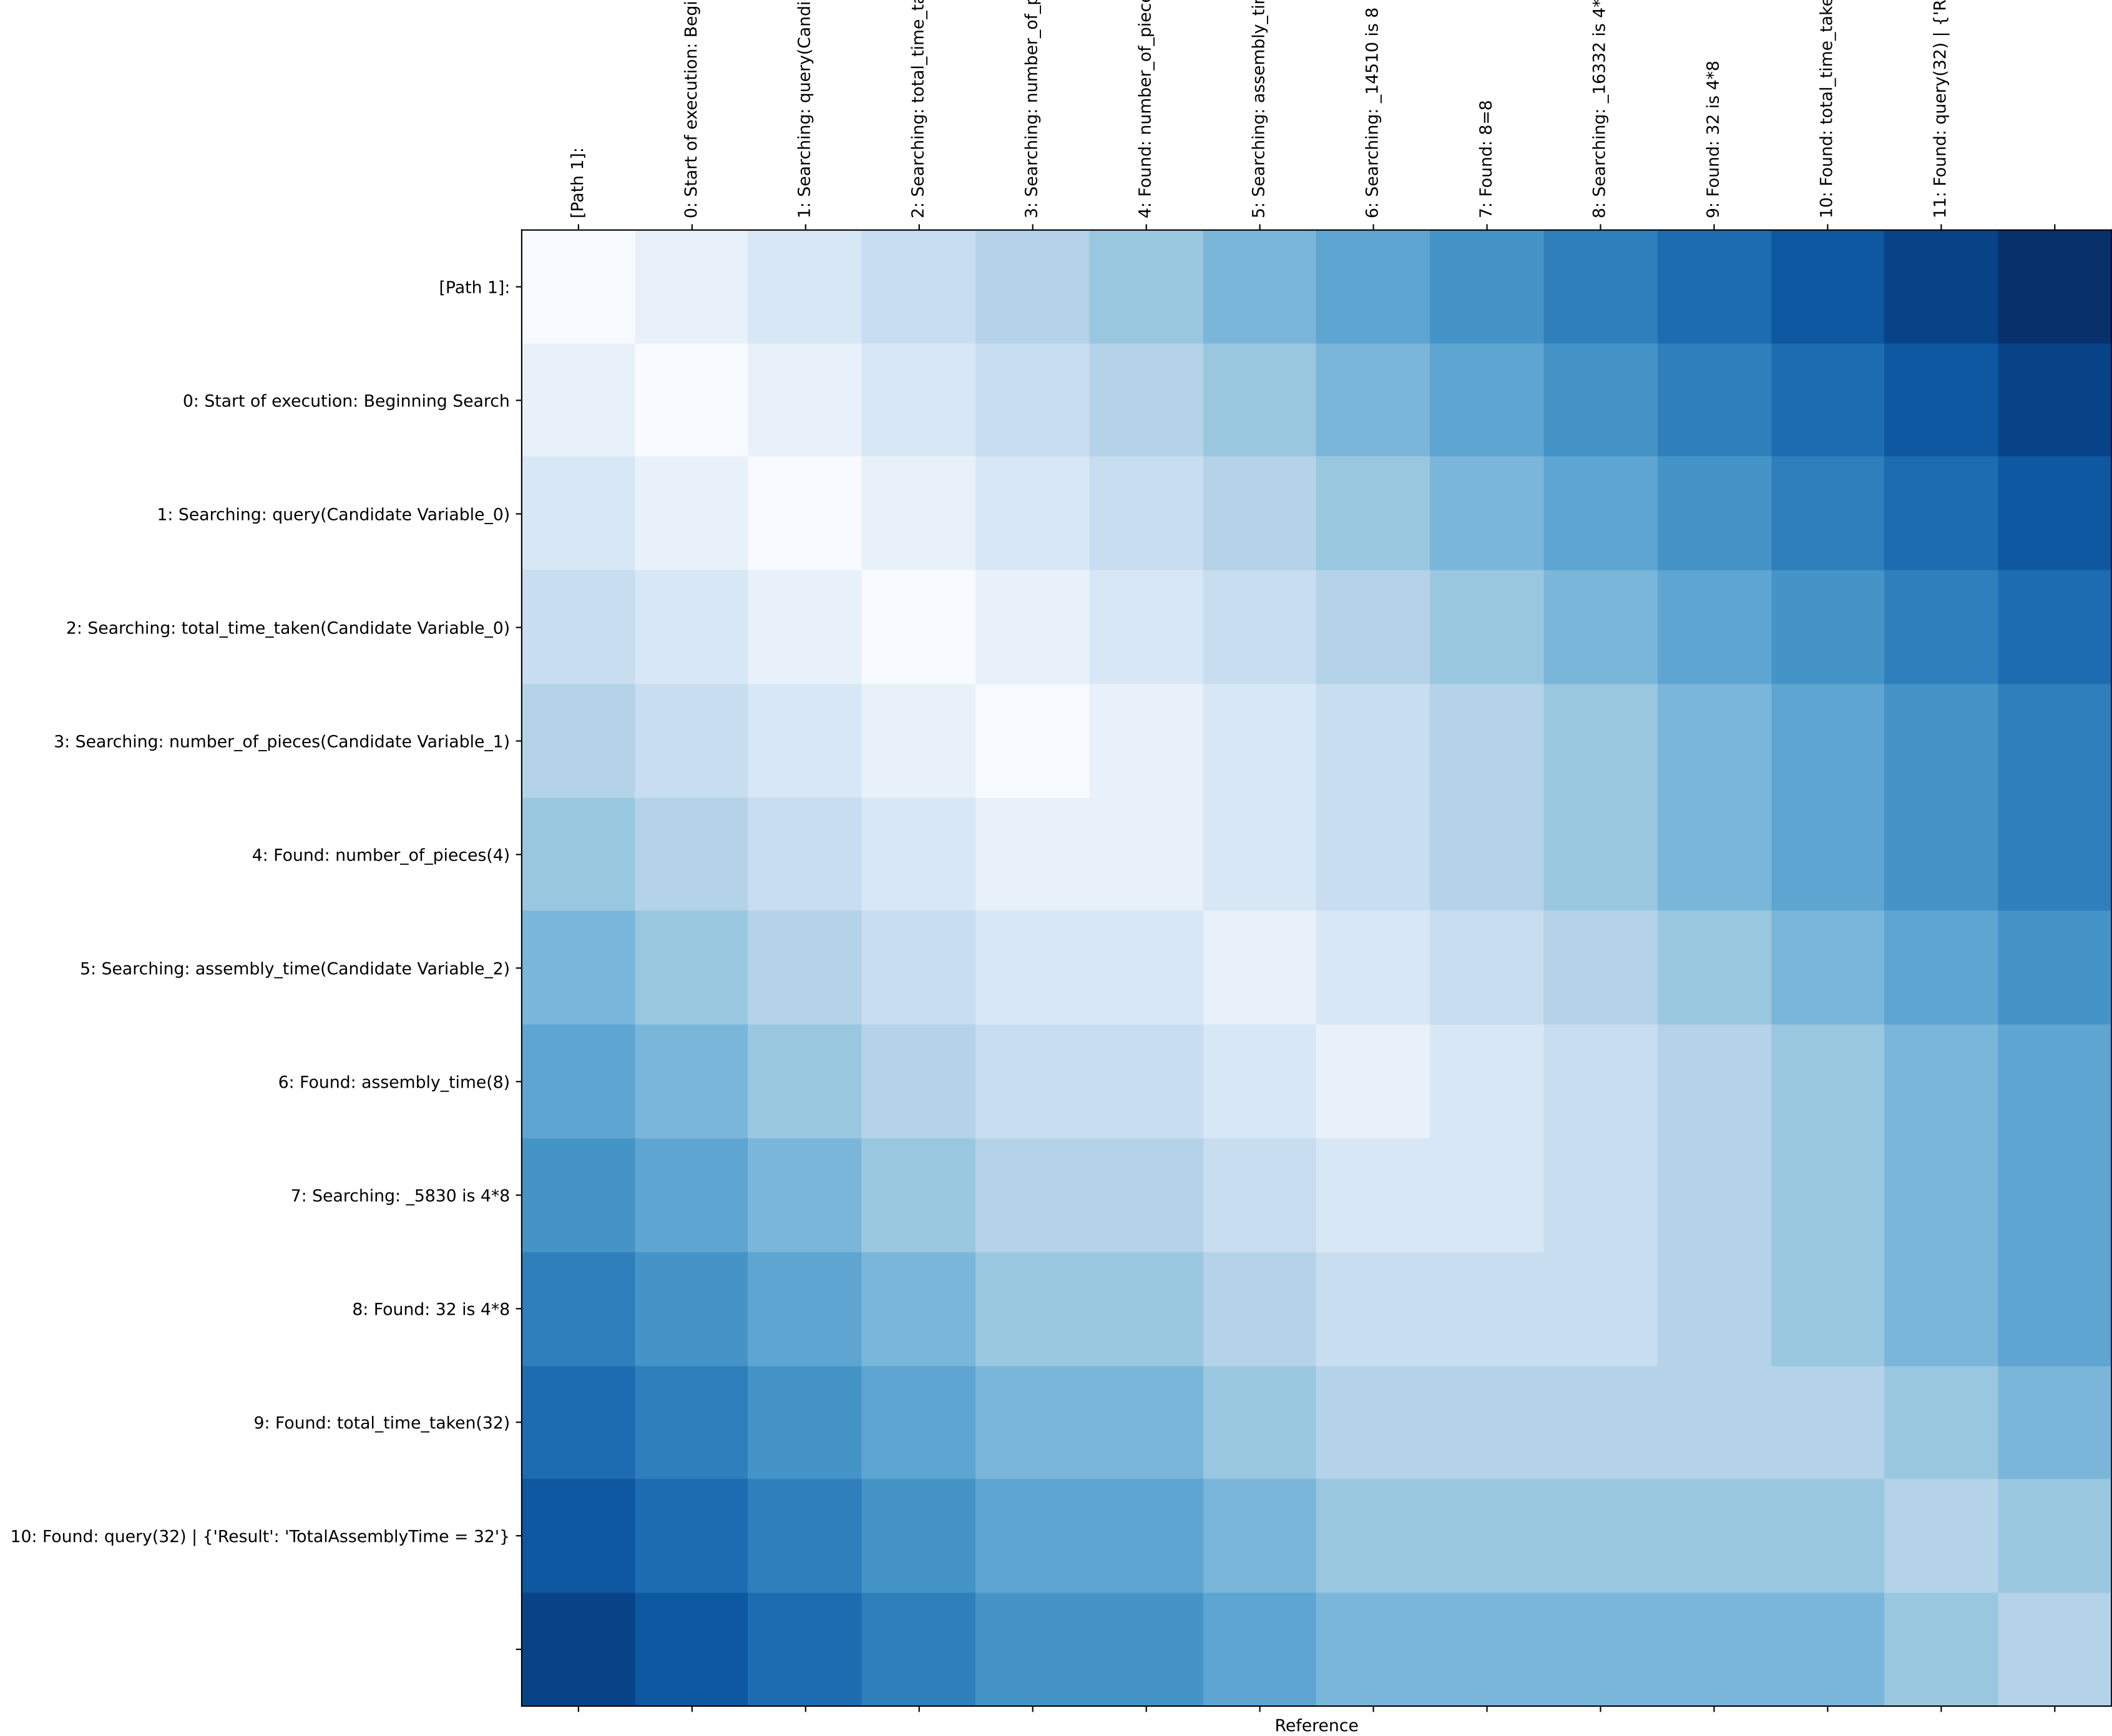

Supplement: supplementary_material [file attachment]
